# Supplementary material for: Small RNA and degradome profiling involved in seed development and oil synthesis of Brassica napus
Source: PubMed Central journal article supplement (PMC6192625; doi:10.1371/journal.pone.0204998), 2018-10-17

**nconservative\_chrCnn\_random\_3238853 slicing GSRNA2T00009903001 at**

alignment score=6 , category=0 , p=0.0277486594399965

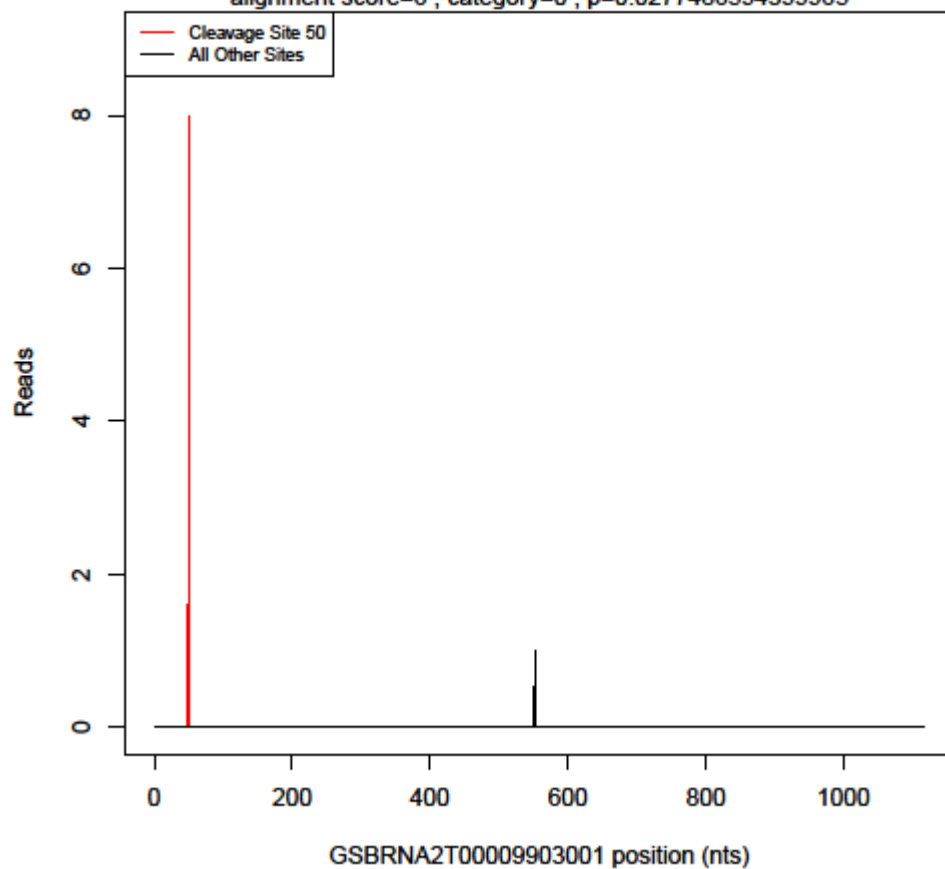

**unconservative\_chrC08\_2435096 slicing GSRNA2T00004433001 at nt 22**

alignment score=4.5 , category=1 , p=0.0273259120077302

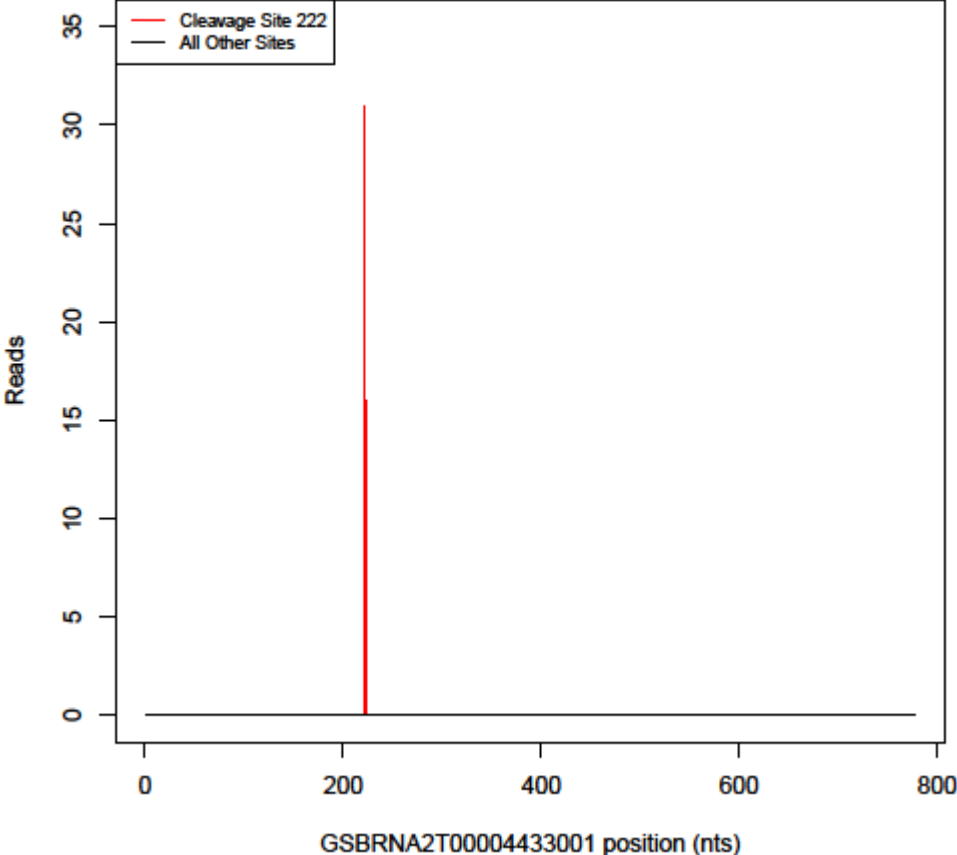

nonconservative\_chrCnn\_random\_3238853 slicing GSRNA2T00012841001 at

alignment score=5 , category=2 , p=0.0219365089750464

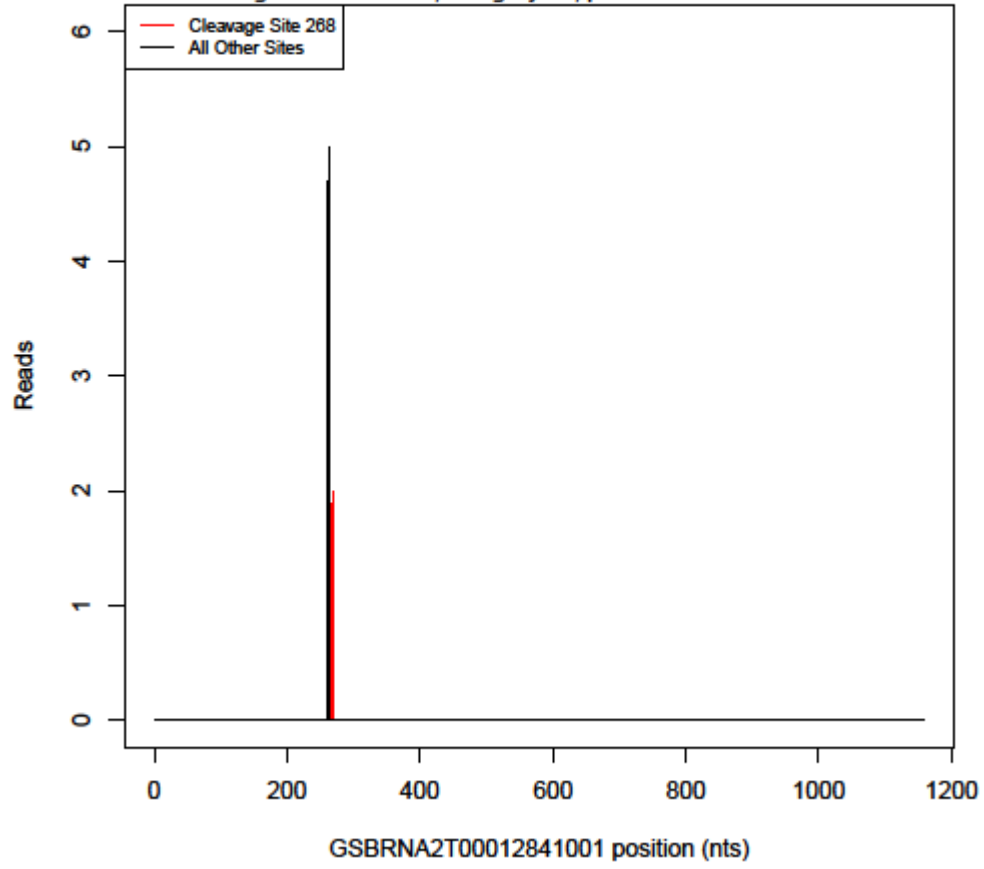

**unconservative\_chrC02\_1179738 slicing GSRNA2T00015974001 at nt 52**

alignment score=6.5 , category=1 , p=0.012846336341889

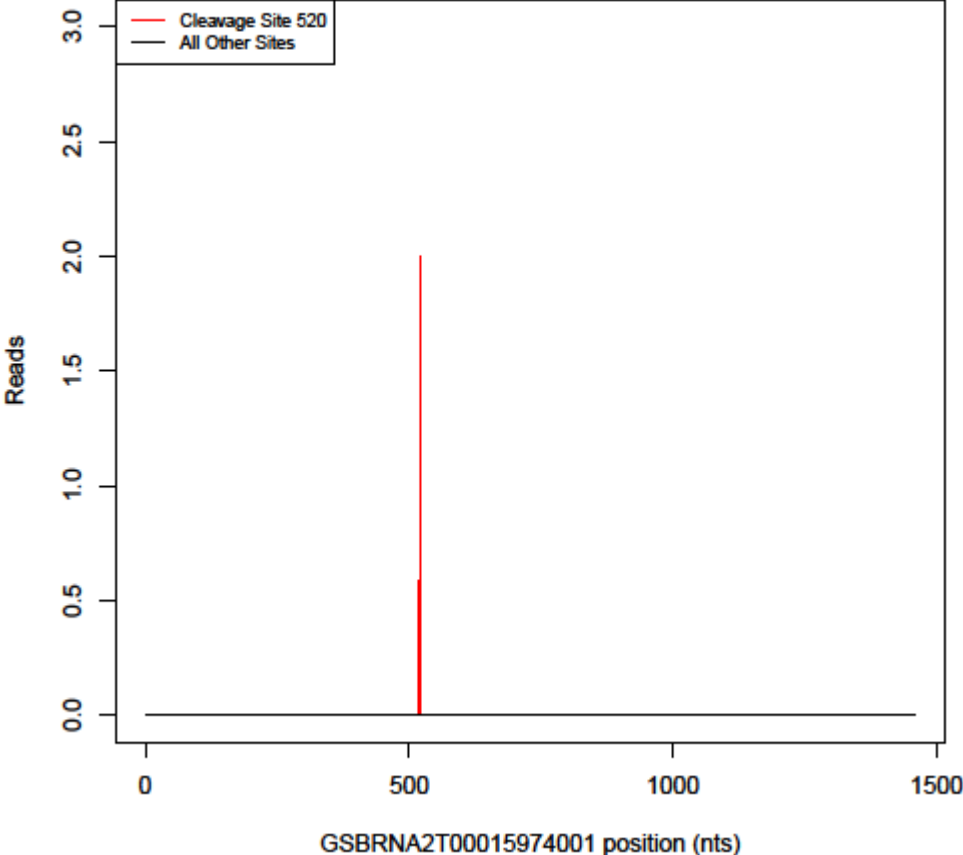

**unconservative\_chrC03\_1367096 slicing GSRNA2T00016770001 at nt 37**

alignment score=6.5 , category=4 , p=0.00234379705002241

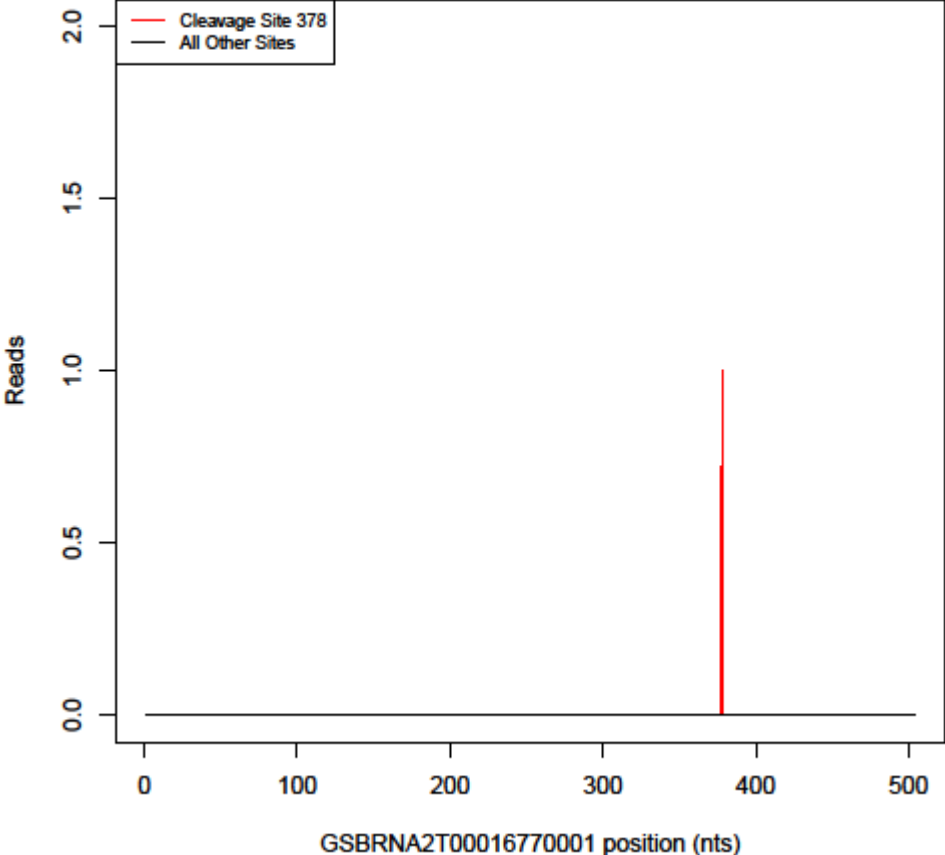

**unconservative\_chrC03\_1420919 slicing GSRNA2T00016770001 at nt 37**

alignment score=6 , category=4 , p=0.007661959414206

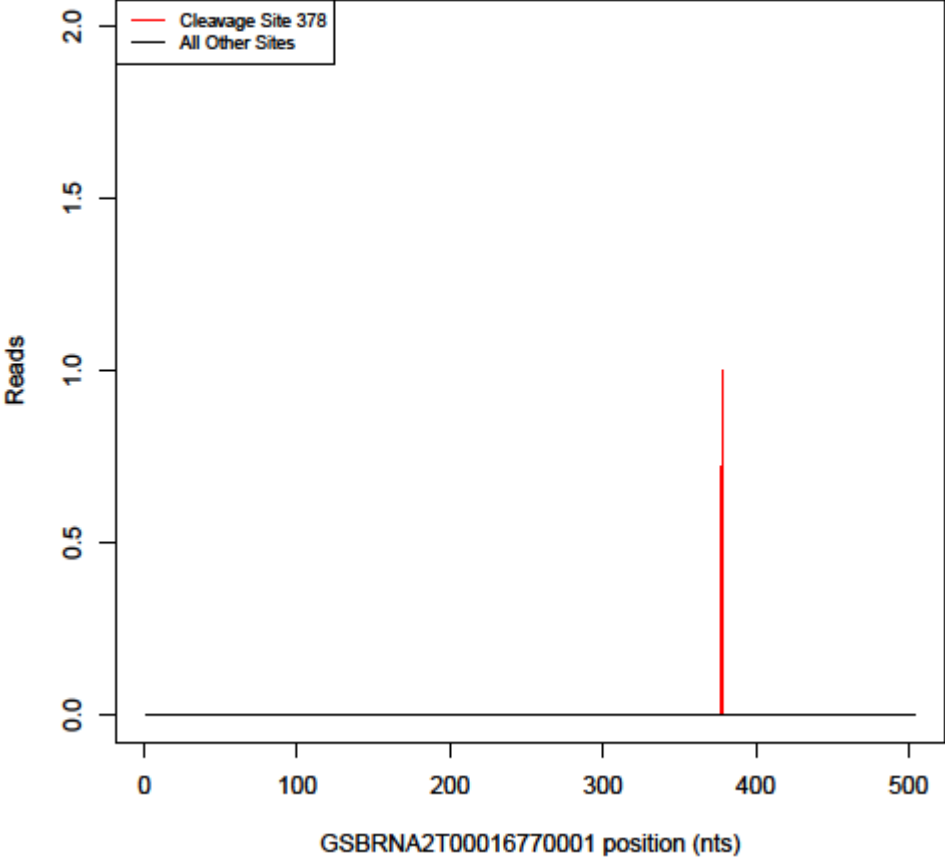

**unconservative\_chrC05\_1799319 slicing GSRNA2T00016770001 at nt 37**

alignment score=5.5 , category=4 , p=0.00641064340111186



nonconservative\_chrCnn\_random\_3338913 slicing GSRNA2T00016770001 at

alignment score=5.5 , category=4 , p=0.00641064340111186

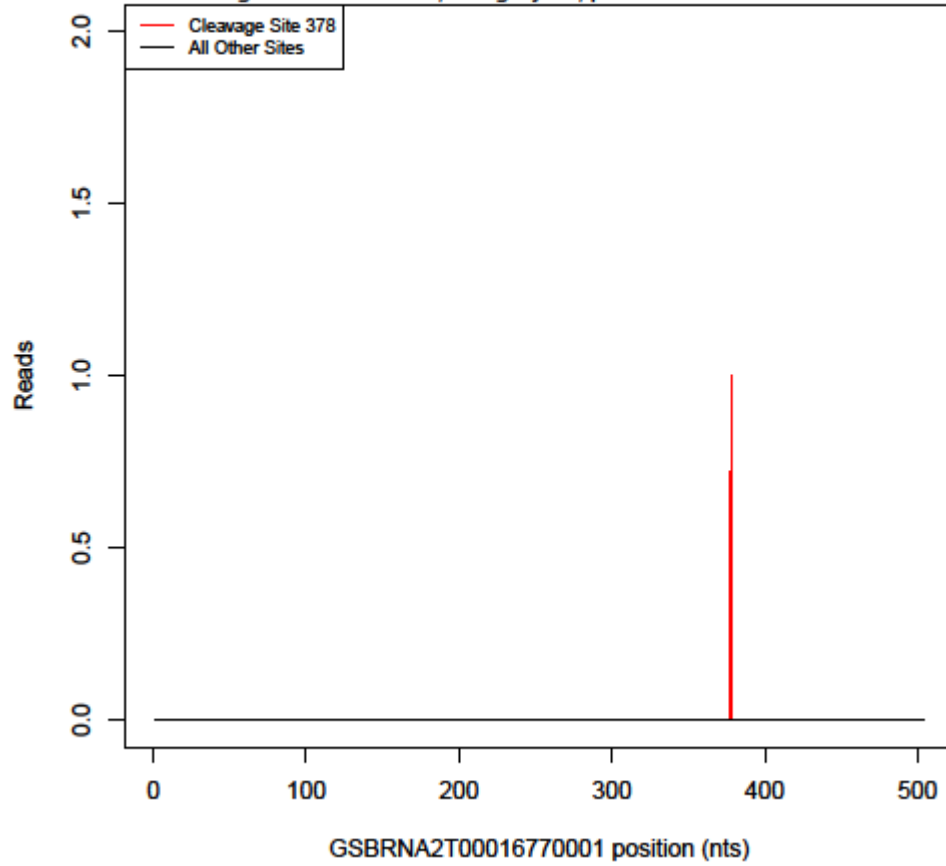



nonconservative\_chromosome\_random\_3575578 slicing GSRNA2T00016770001 at

alignment score=6 , category=4 , p=0.0134663396612509

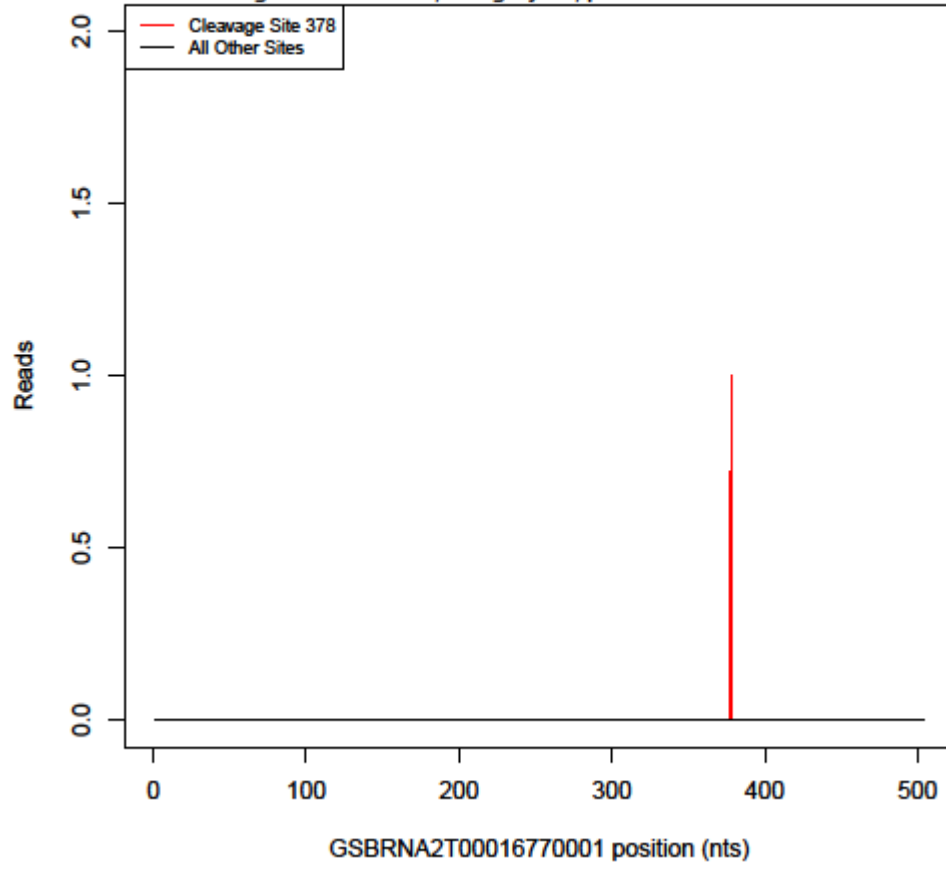

conservative\_chrAnn\_random\_2962078 slicing GSRNA2T00021710001 at

alignment score=7 , category=1 , p=0.00219100442847286

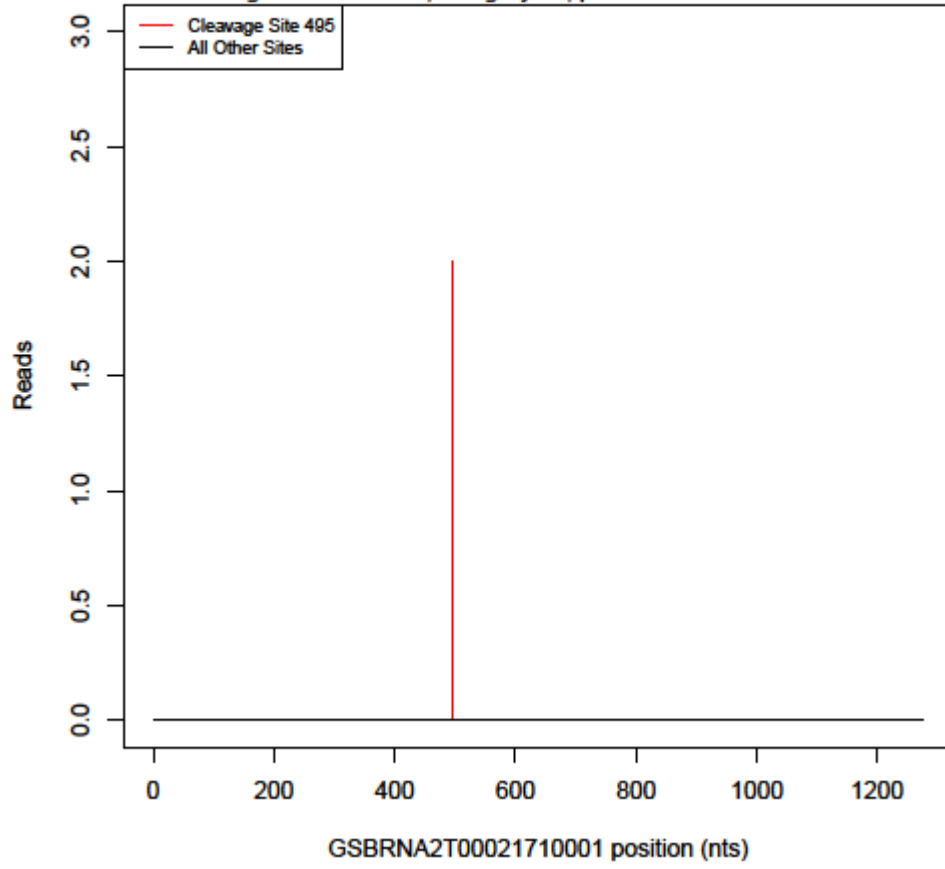

**unconservative\_chrA05\_464962 slicing GSRNA2T00022584001 at nt 21:**

alignment score=6.5 , category=1 , p=0.0176210516306952

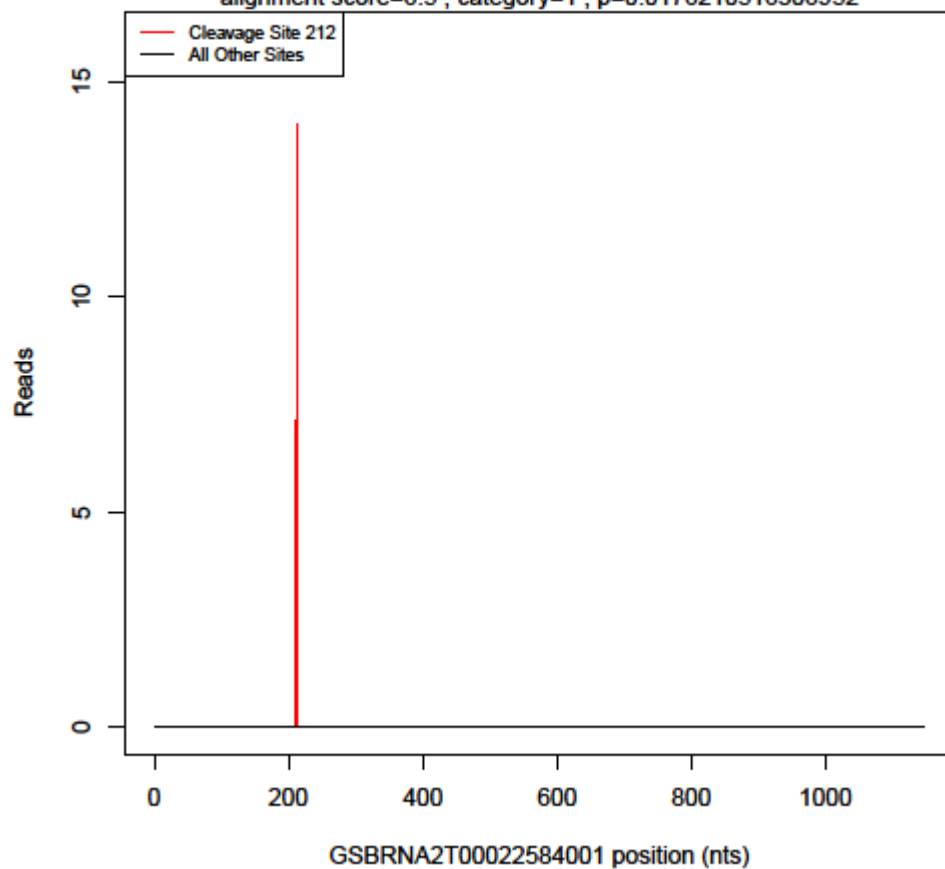

**unconservative\_chrA09\_84088 slicing GSRNA2T00022584001 at nt 21:**

alignment score=7 , category=1 , p=0.00230618738106836

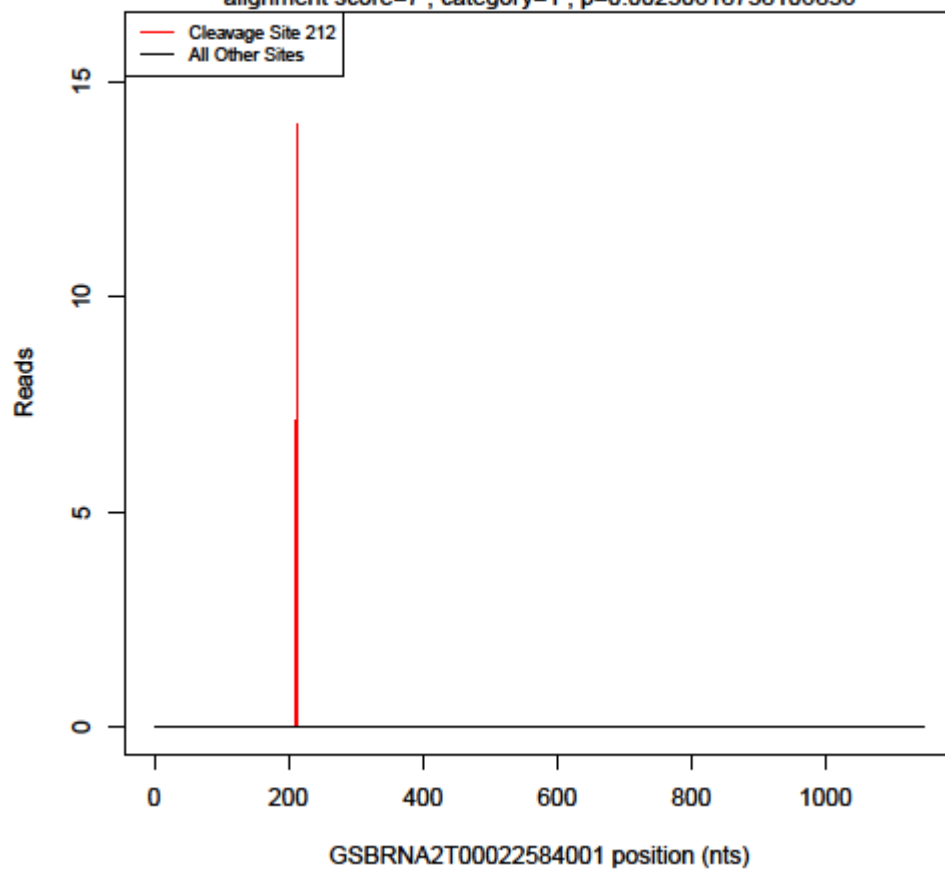

**unconservative\_chrC04\_1604978 slicing GSRNA2T00022584001 at nt 21**

alignment score=7 , category=1 , p=0.00230618738106836

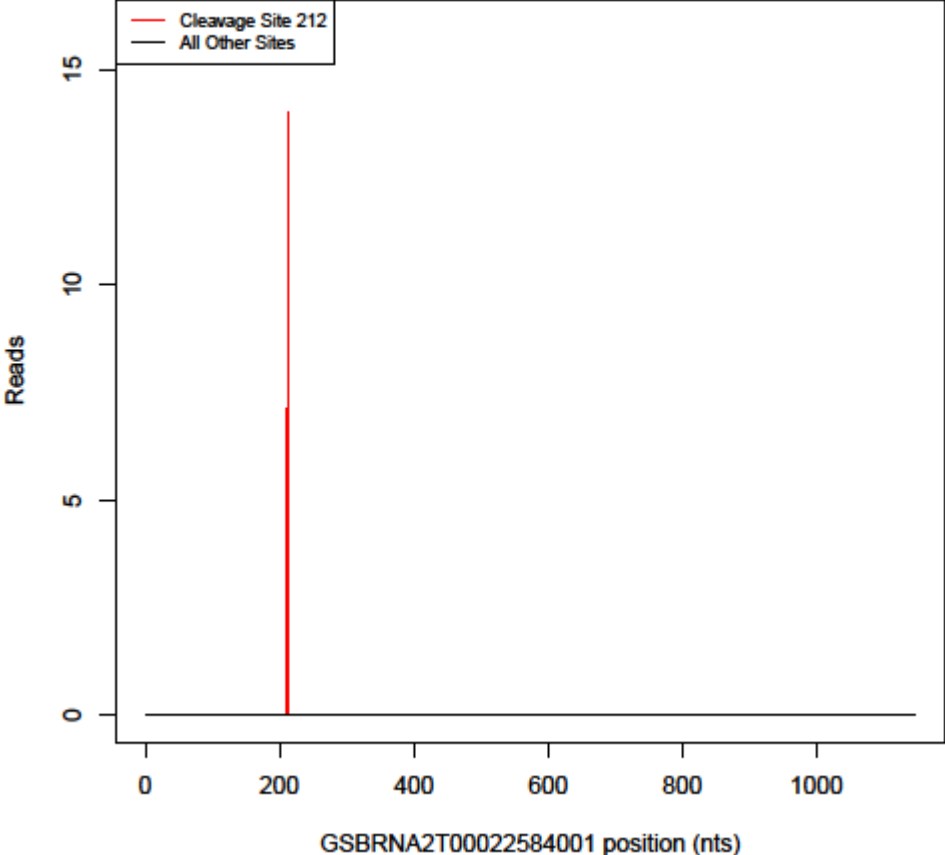

**unconservative\_chrA06\_547631 slicing GSRNA2T00024561001 at nt 58.**

alignment score=4 , category=1 , p=0.0286724346814085

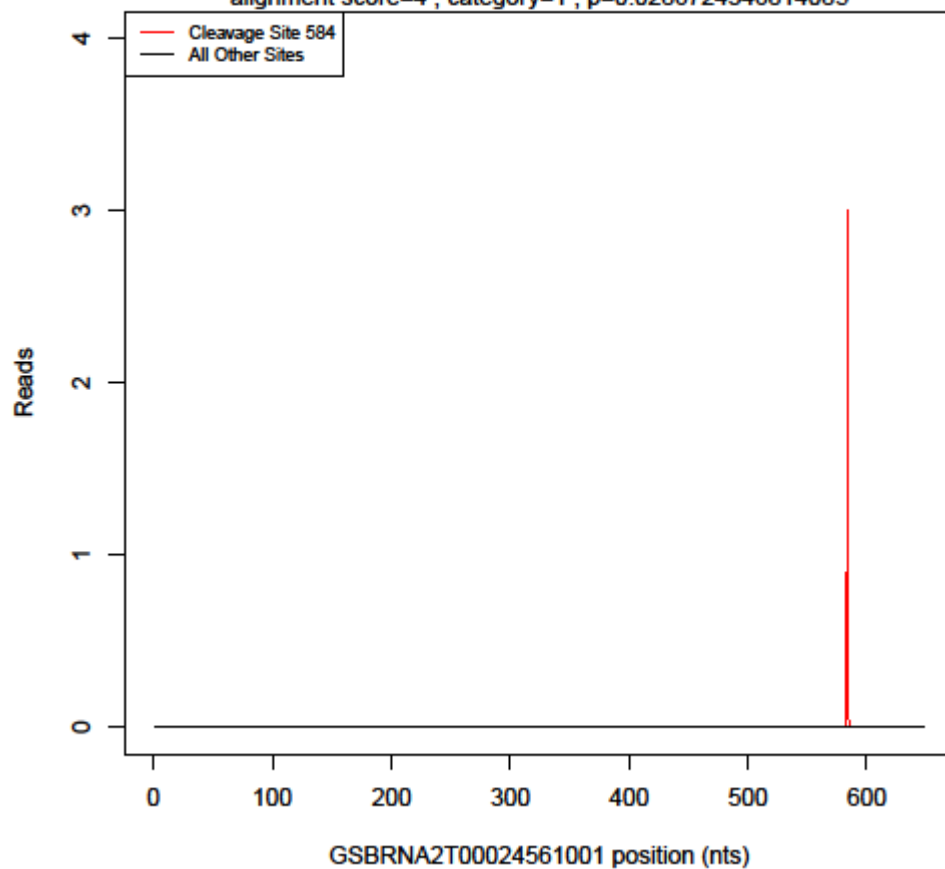

**unconservative\_chrC08\_2356729 slicing GSRNA2T00030795001 at nt 70**

alignment score=6.5 , category=0 , p=0.00168871828123673

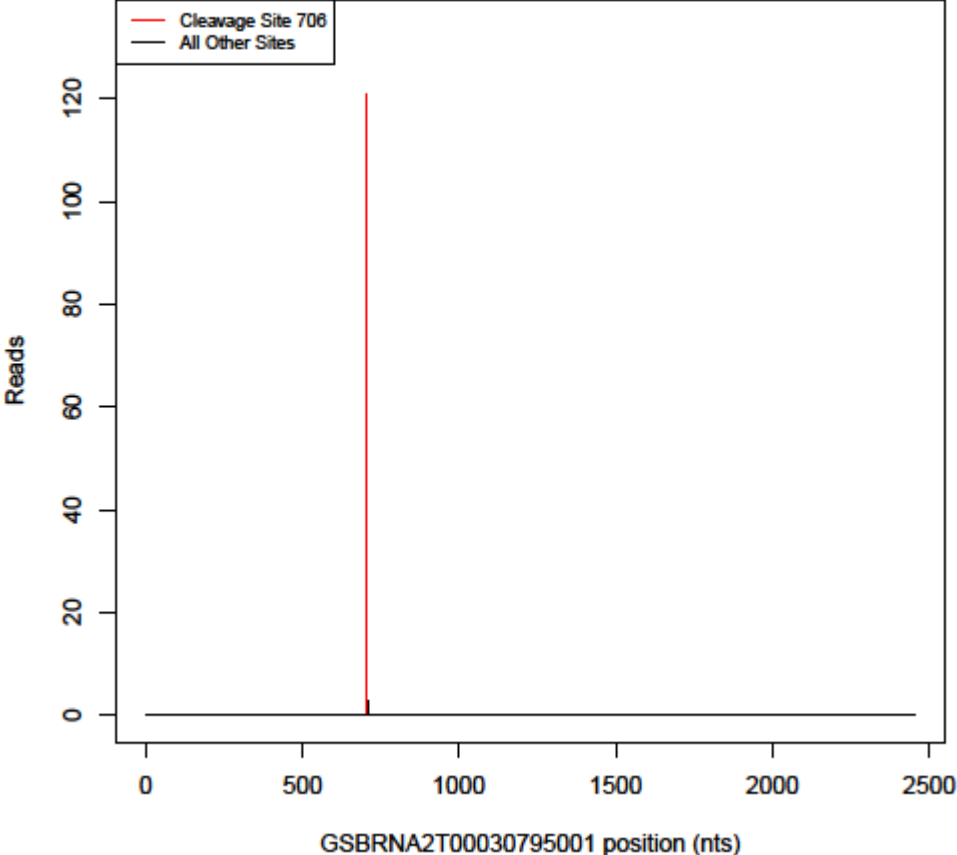

nconservative\_chrCnn\_random\_3238853 slicing GSRNA2T00024574001 at

alignment score=7 , category=1 , p=0.0497456572986954

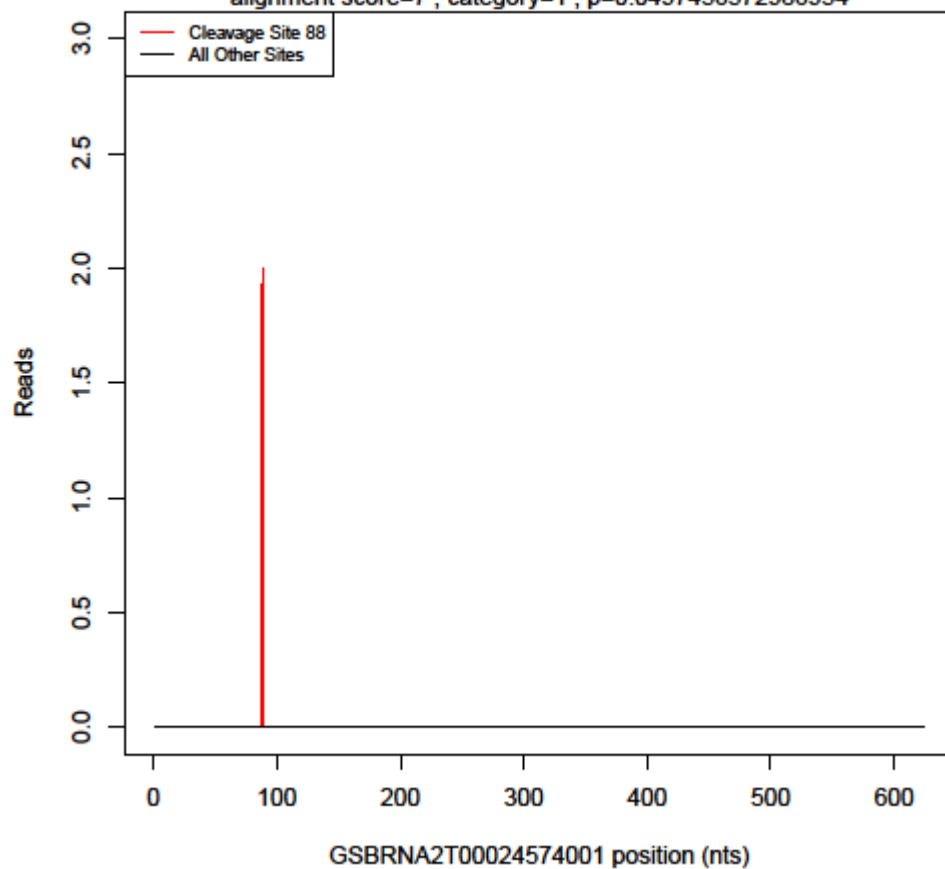



**unconservative\_chrA03\_274816 slicing GSRNA2T00032689001 at nt 173**

alignment score=5 , category=0 , p=0.0160667605580853

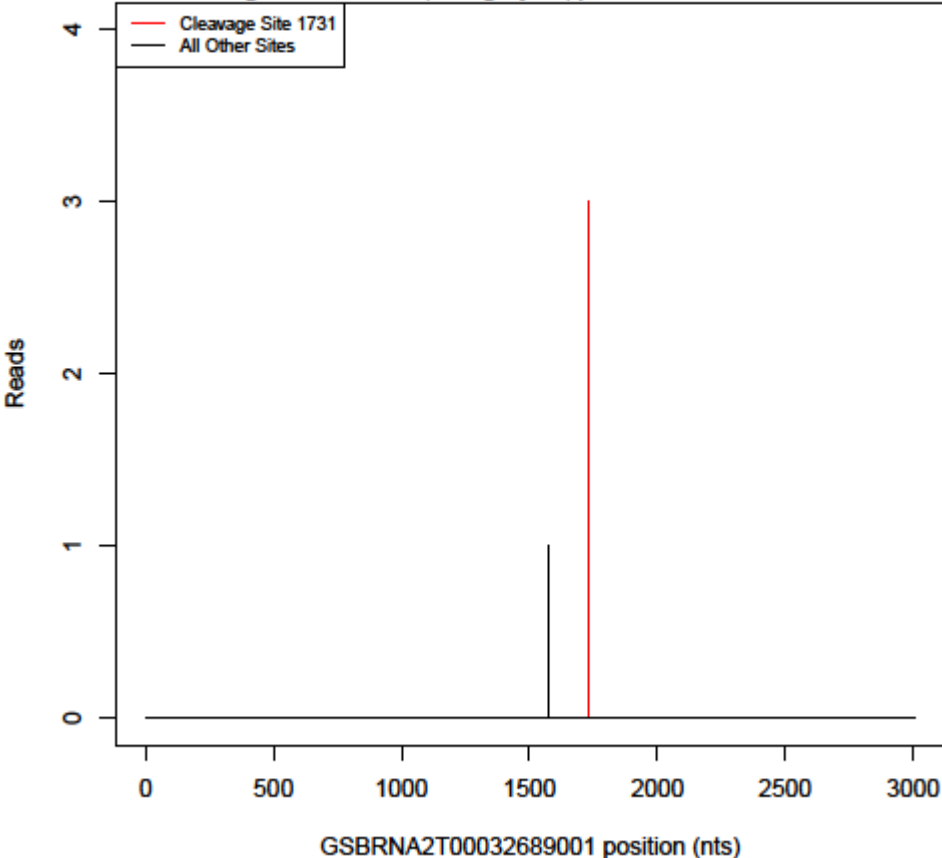

**unconservative\_chrA05\_480212 slicing GSRNA2T00032689001 at nt 1731**

alignment score=5 , category=0 , p=0.0160667605580853

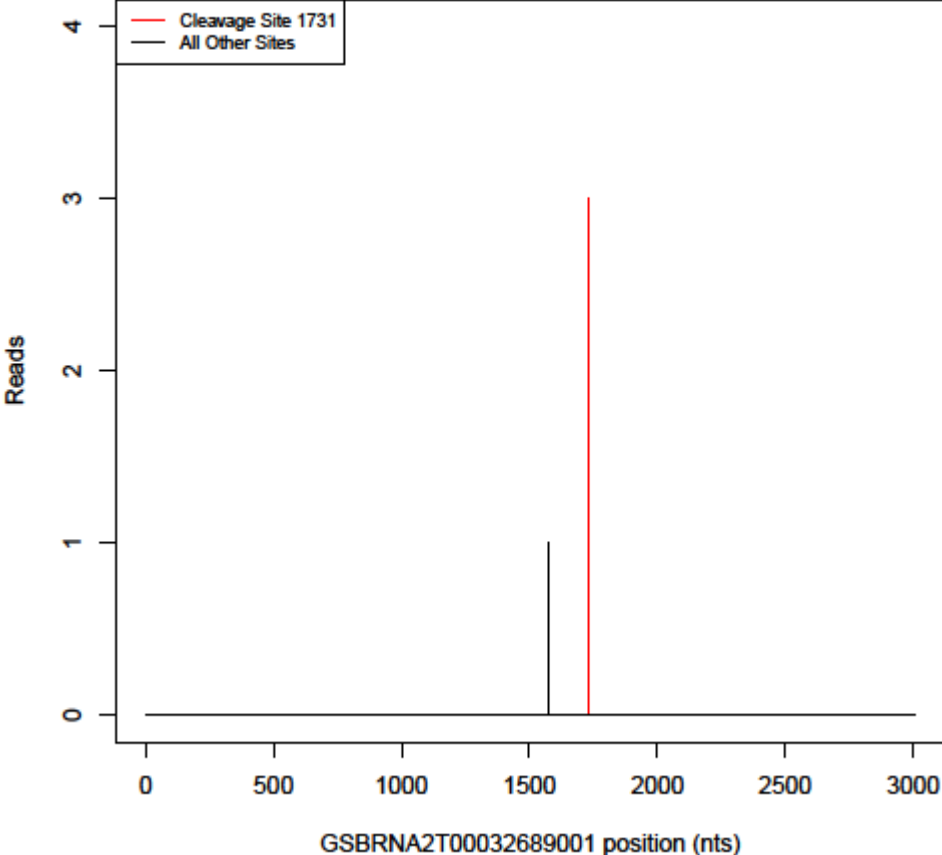

**unconservative\_chrA07\_648408 slicing GSRNA2T00032689001 at nt 1731**

alignment score=5 , category=0 , p=0.0160667605580853



**unconservative\_chrA07\_677856 slicing GSRNA2T00032689001 at nt 1731**

alignment score=5 , category=0 , p=0.0160667605580853



**unconservative\_chrC05\_1900490 slicing GSRNA2T00035153001 at nt 288**

alignment score=6.5 , category=1 , p=0.0115919853308402

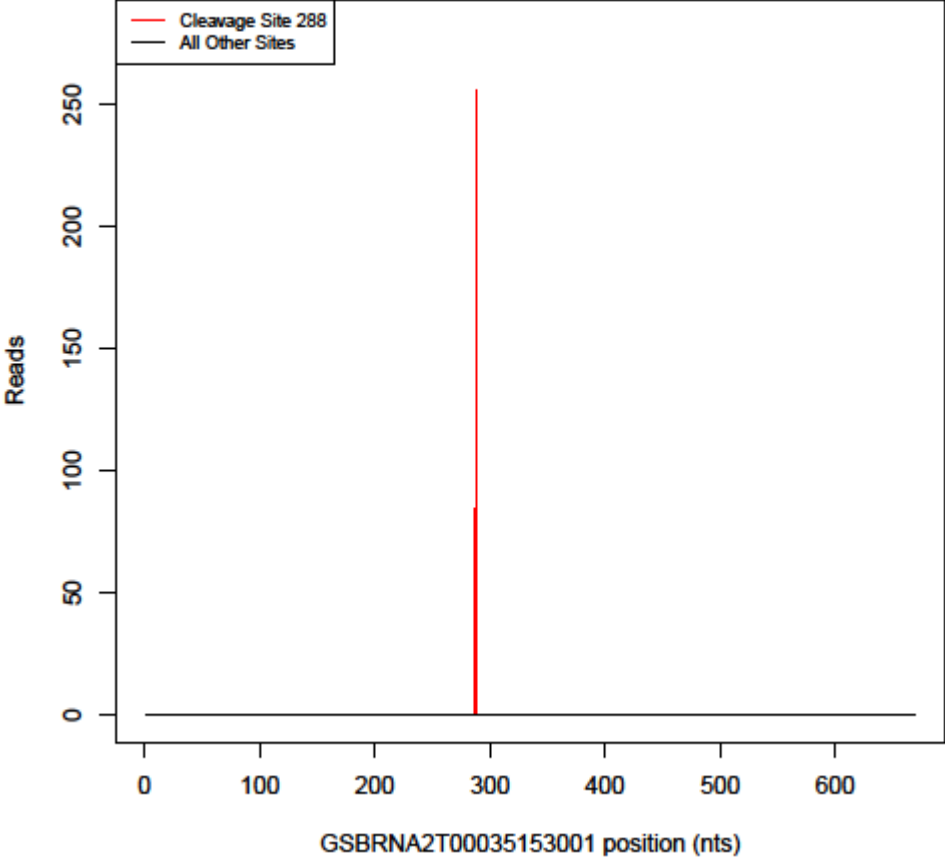

**unconservative\_chrA06\_528202 slicing GSRNA2T00044709001 at nt 56**

alignment score=6 , category=2 , p=0.00188149405217319

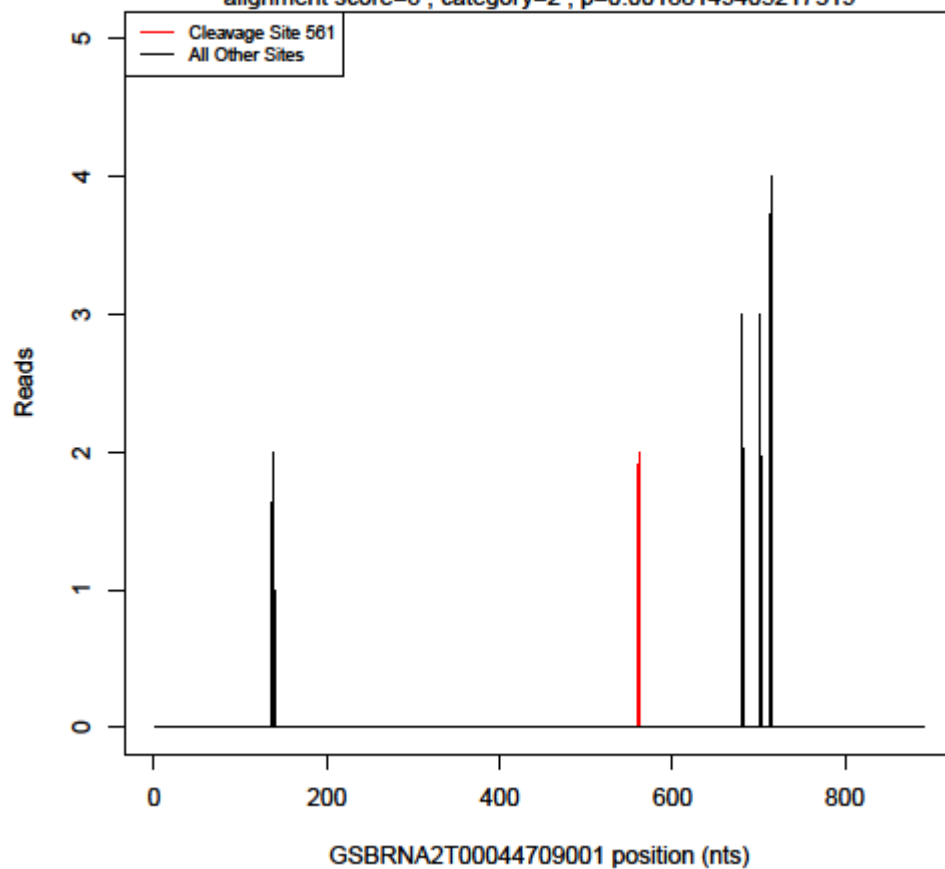

**unconservative\_chrA09\_836359 slicing GSRNA2T00044709001 at nt 56**

alignment score=6 , category=2 , p=0.00188149405217319



**unconservative\_chrC07\_2275757 slicing GSRNA2T00044709001 at nt 56**

alignment score=6 , category=2 , p=0.00188149405217319

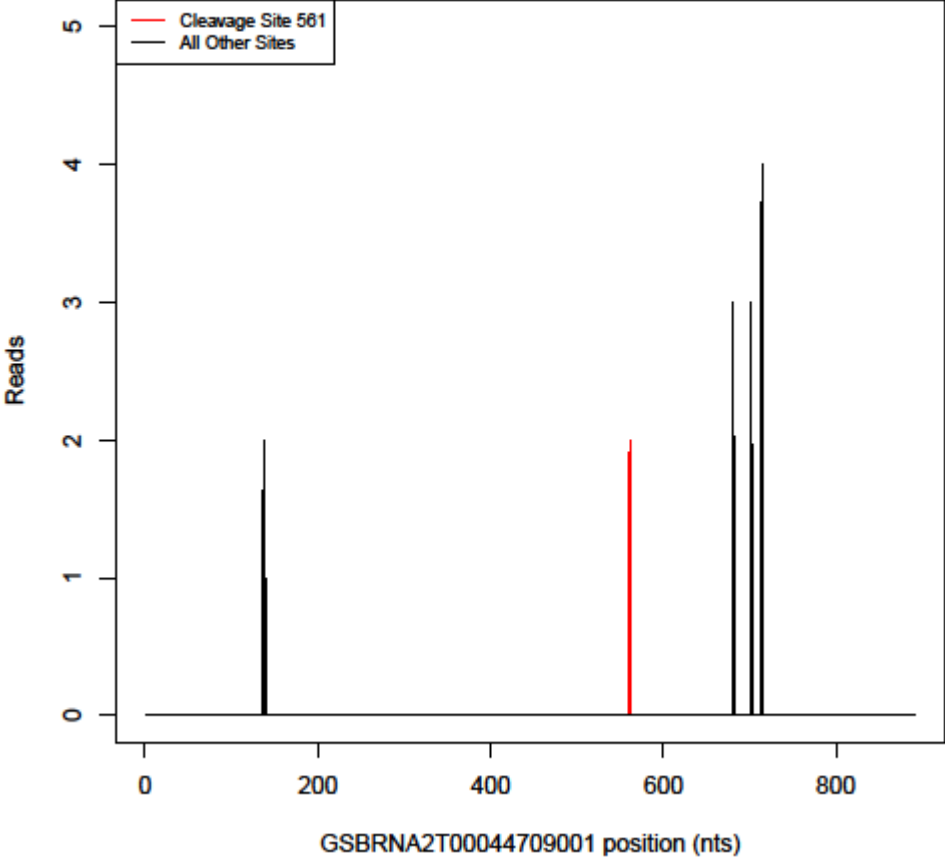



nonconservative\_chrAnn\_random\_3107980 slicing GSRNA2T00047238001 at

alignment score=7 , category=0 , p=0.0129854131158863

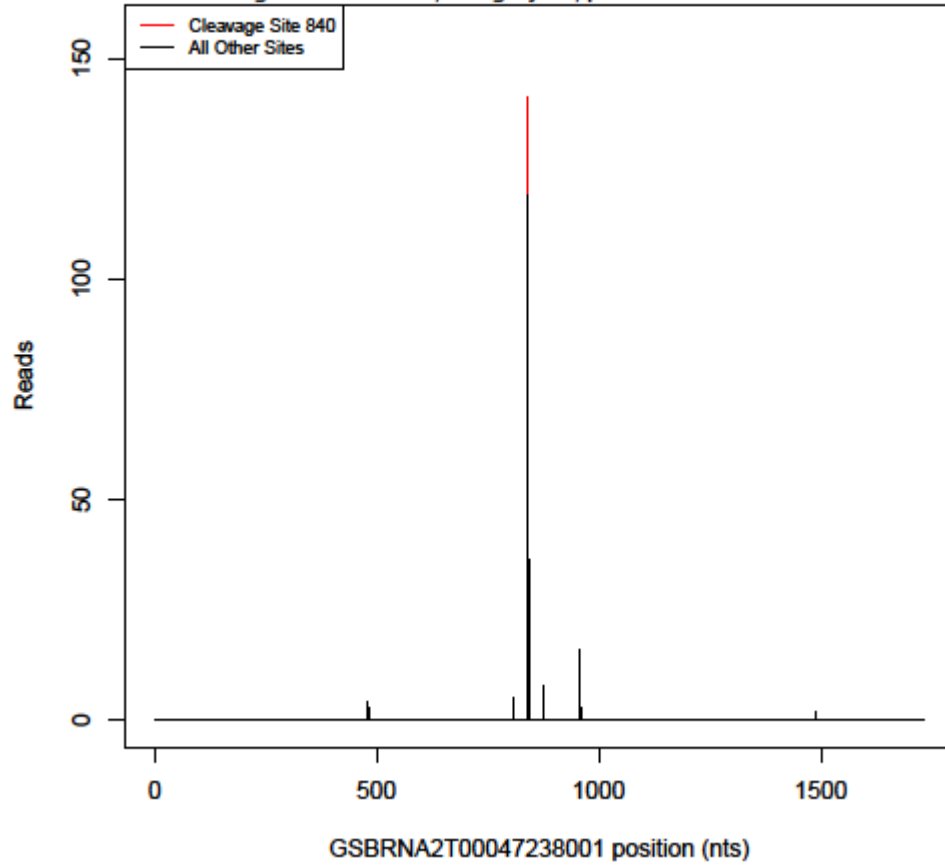

nonconservative\_chrCnn\_random\_3402539 slicing GSRNA2T00044709001 at

alignment score=6 , category=2 , p=0.00188149405217319

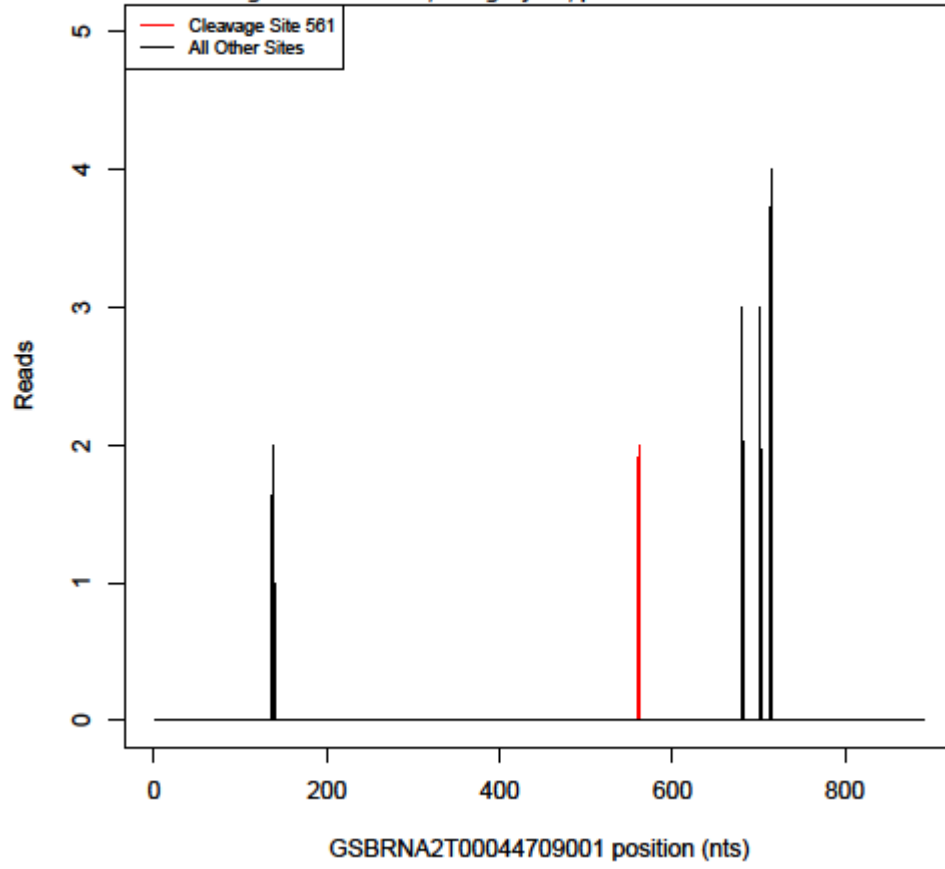

**unconservative\_chrA10\_956355 slicing GSRNA2T00049100001 at nt 111**

alignment score=5.5 , category=4 , p=0.0274277758346682

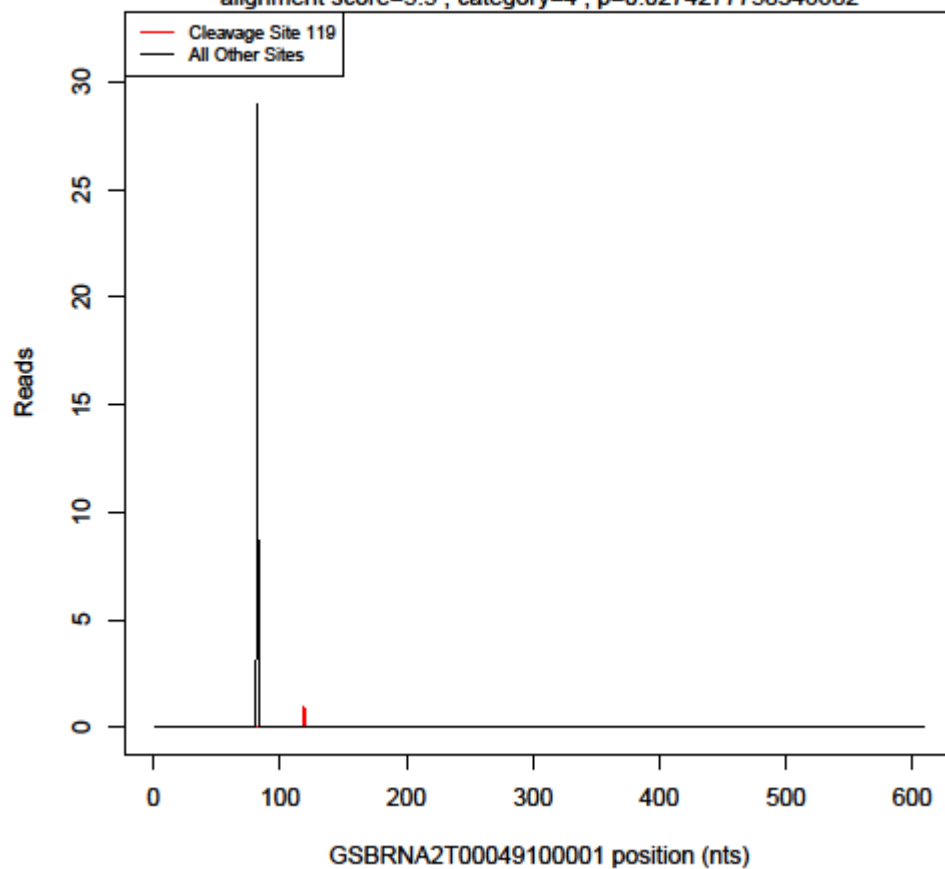

**unconservative\_chrC09\_2538640 slicing GSRNA2T00049100001 at nt 11**

alignment score=5.5 , category=4 , p=0.0274277758346682

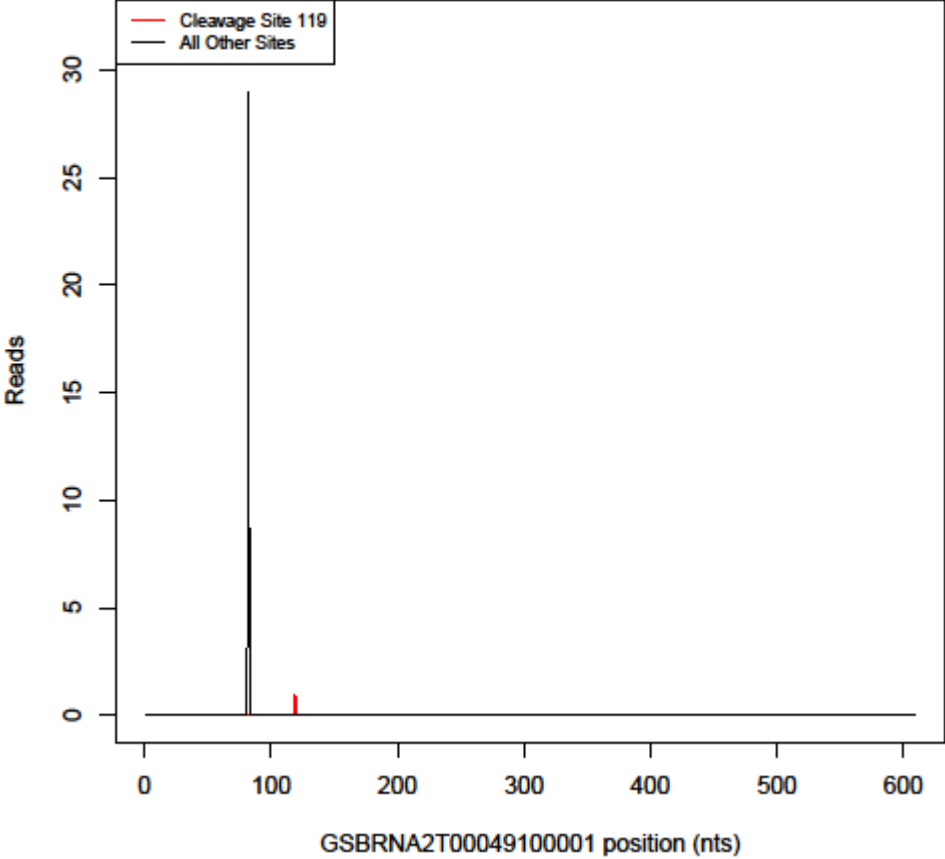

**nconservative\_chrAnn\_random\_3061750 slicing GSRNA2T00049791001 at**

alignment score=6.5 , category=0 , p=0.00584204054073001

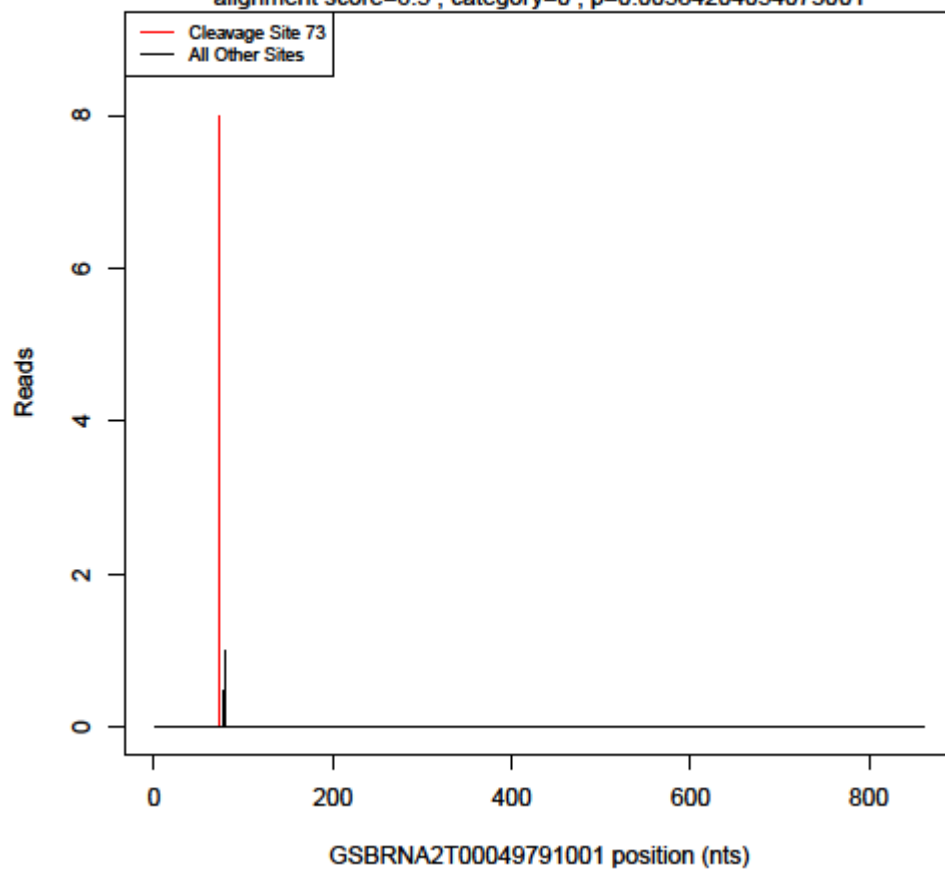

**unconservative\_chrC08\_2379444 slicing GSRNA2T00061116001 at nt 8:**

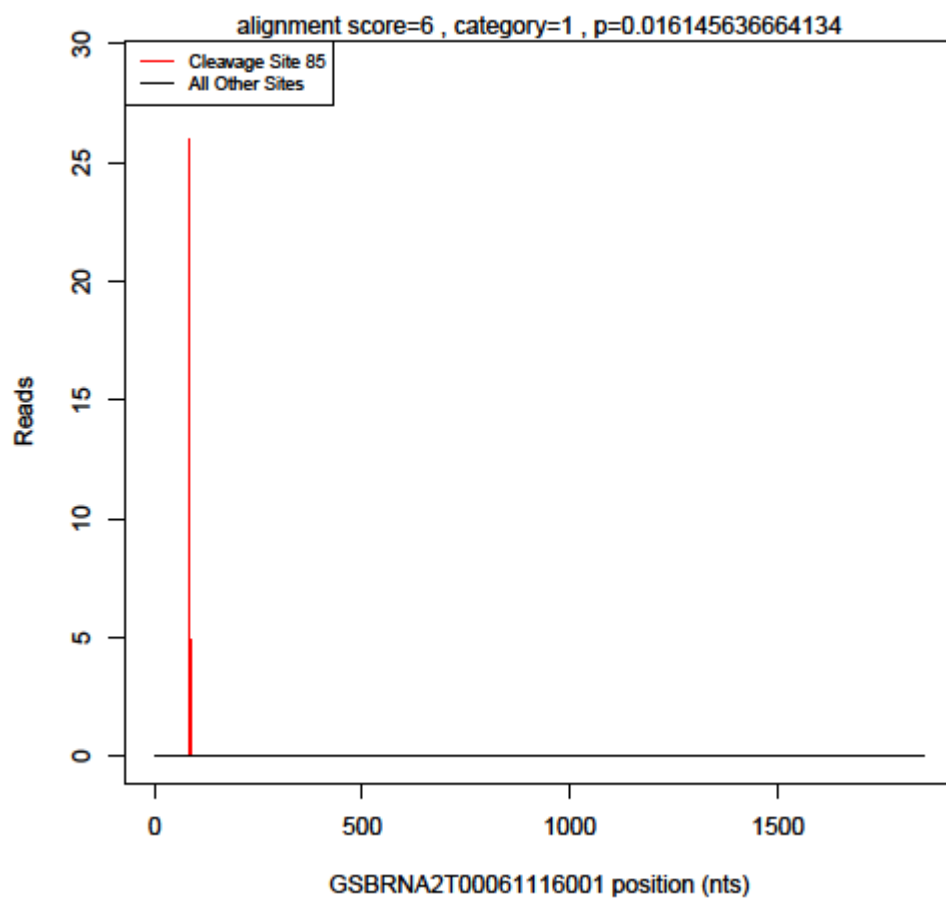

**unconservative\_chrA03\_274816 slicing GSRNA2T00063083001 at nt 61**

alignment score=7 , category=0 , p=0.025582642368013

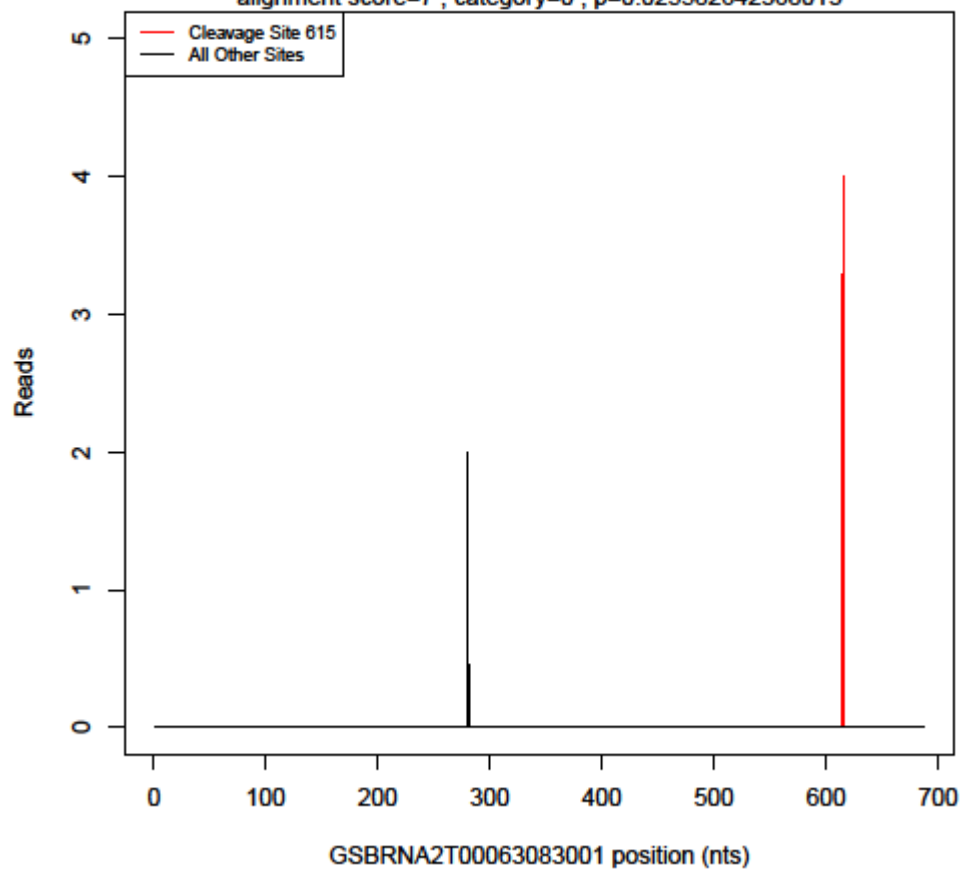

**unconservative\_chrA05\_480212 slicing GSRNA2T00063083001 at nt 61**

alignment score=7 , category=0 , p=0.025582642368013





**unconservative\_chrA07\_648408 slicing GSRNA2T00063083001 at nt 61**

alignment score=7 , category=0 , p=0.025582642368013



**unconservative\_chrA07\_677856 slicing GSRNA2T00063083001 at nt 61**

alignment score=7 , category=0 , p=0.025582642368013



**unconservative\_chrA03\_274816 slicing GSRNA2T00070350001 at nt 40**

alignment score=6 , category=4 , p=0.0459711096567242

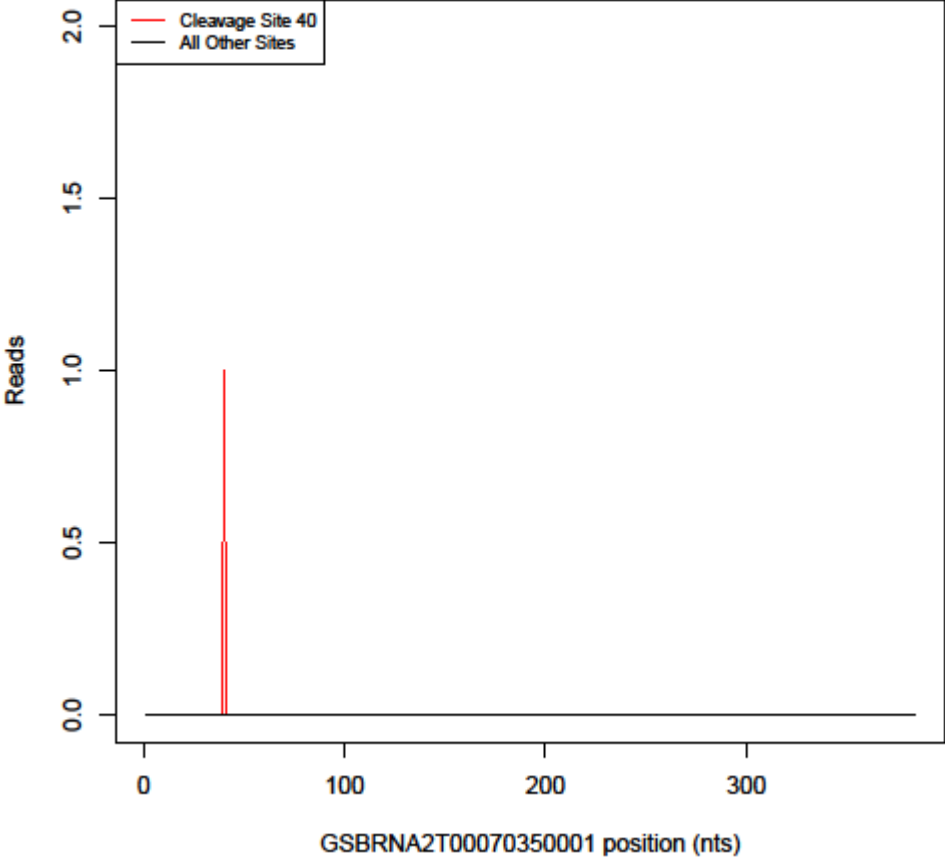

**unconservative\_chrA05\_480212 slicing GSRNA2T00070350001 at nt 40**

alignment score=6 , category=4 , p=0.0459711096567242

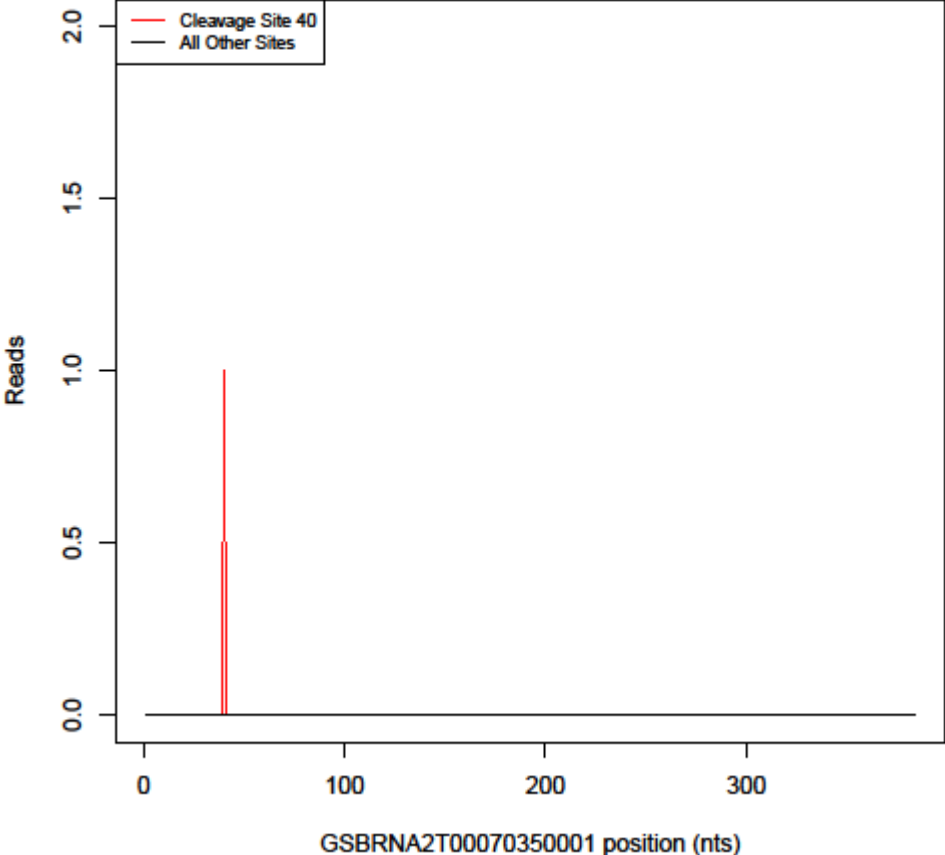

**unconservative\_chrA07\_648408 slicing GSRNA2T00070350001 at nt 40**

alignment score=6 , category=4 , p=0.0459711096567242



**unconservative\_chrA07\_677856 slicing GSRNA2T00070350001 at nt 40**

alignment score=6 , category=4 , p=0.0459711096567242



**unconservative\_chrC05\_1900490 slicing GSRNA2T00071654001 at nt 8**

alignment score=6.5 , category=1 , p=0.0115919853308402

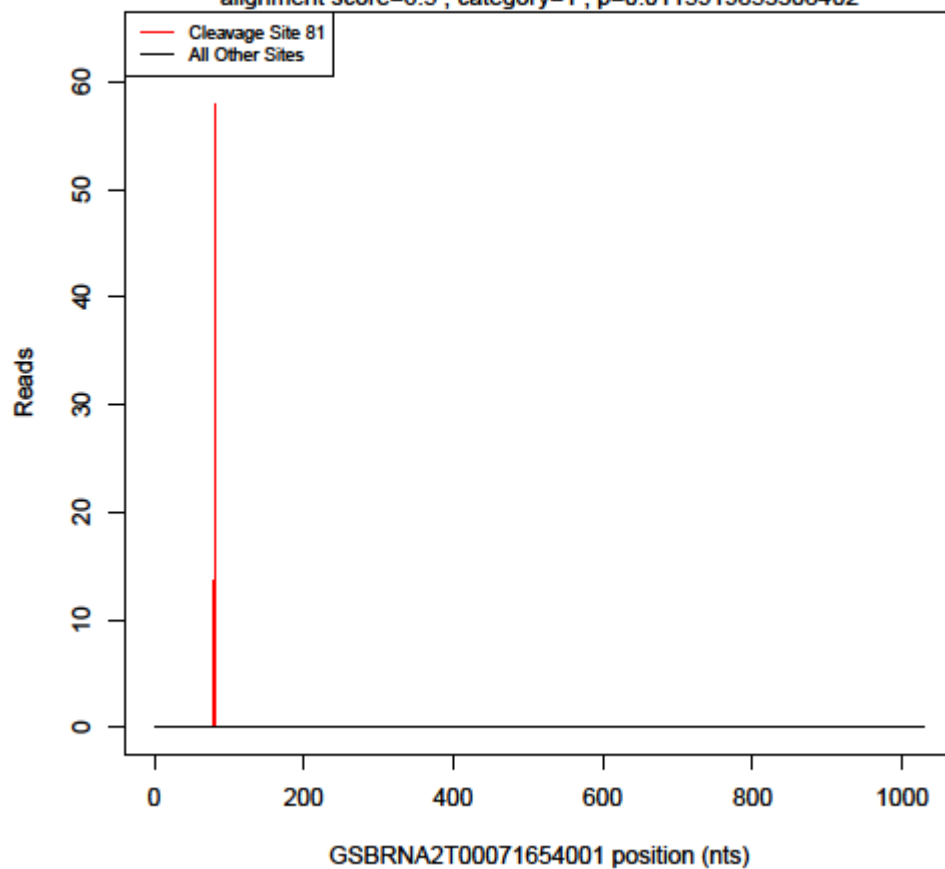

nonconservative\_chrCnn\_random\_3473360 slicing GSRNA2T00071328001 at

alignment score=6.5 , category=4 , p=0.0157785743441008

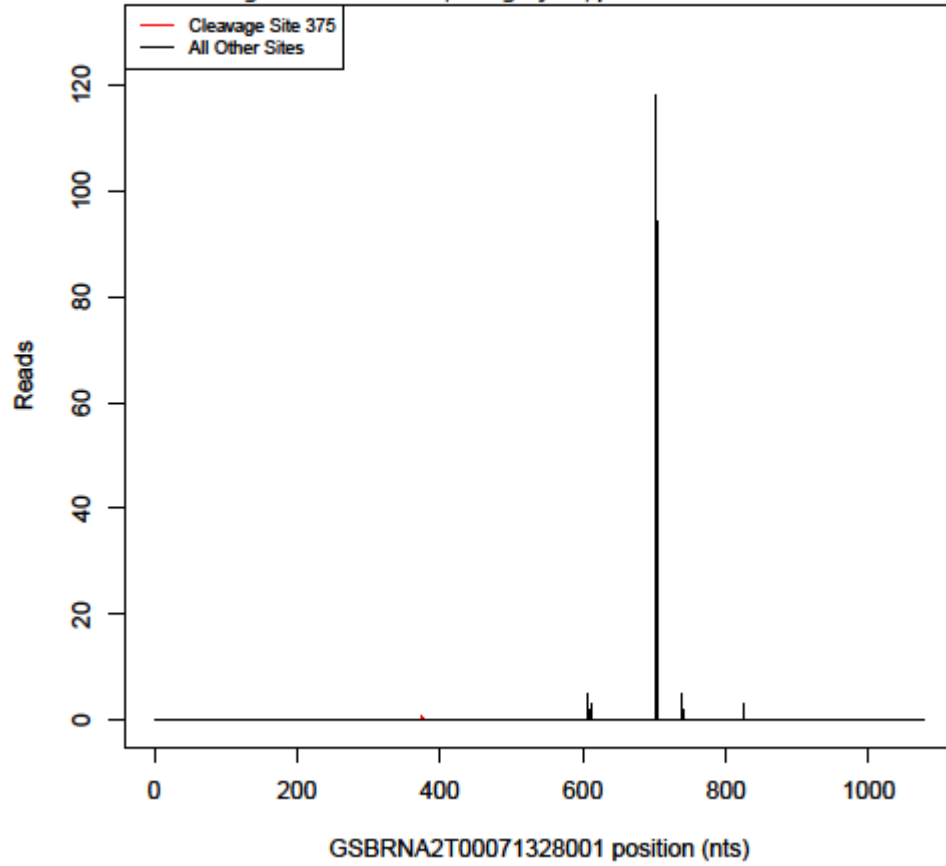



**unconservative\_chrC01\_975061 slicing GSRNA2T00074284001 at nt 16'**

alignment score=7 , category=0 , p=0.000169000295167754

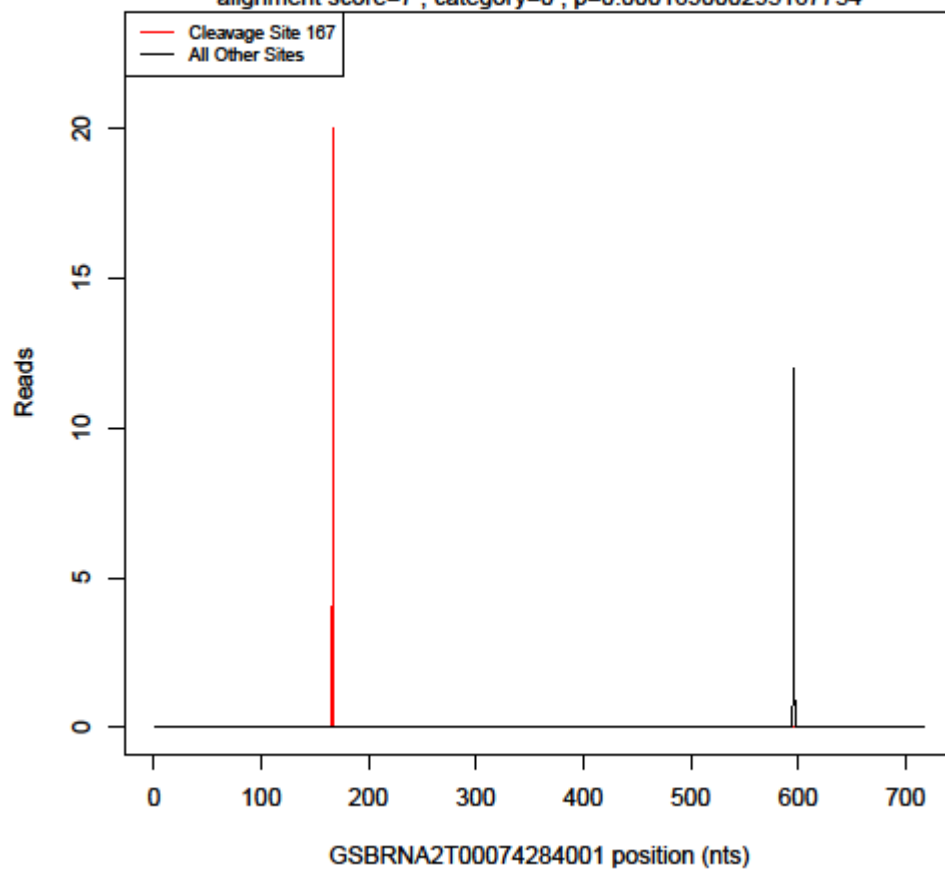

nonconservative\_chrCnn\_random\_3249217 slicing GSRNA2T00077207001 at

alignment score=4.5 , category=4 , p=0.00130278843430398

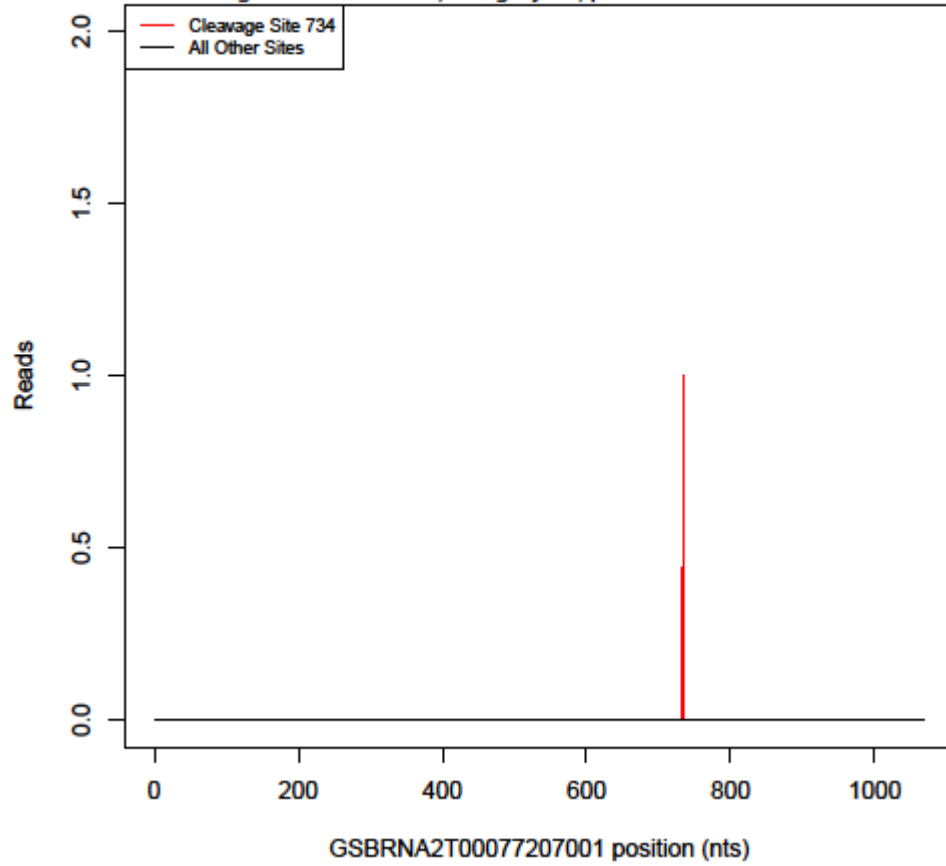

**unconservative\_chrC04\_1583187 slicing GSRNA2T00079541001 at nt 77**

alignment score=5.5 , category=0 , p=0.0287614668835552

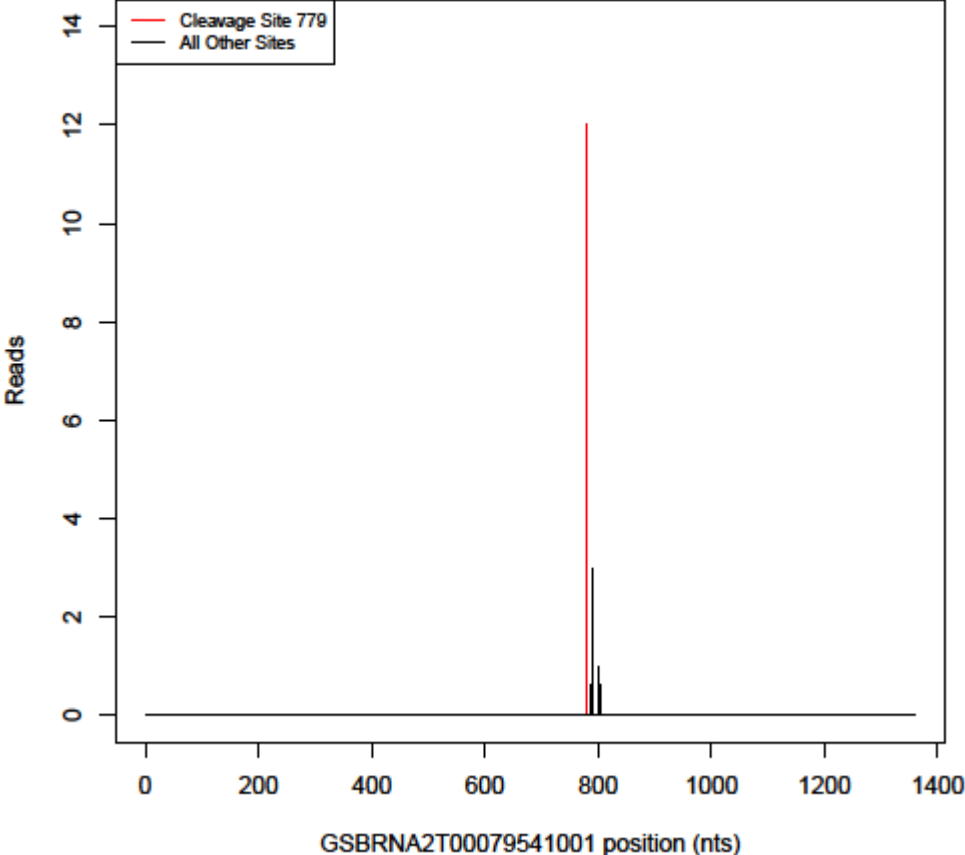

**unconservative\_chrC05\_1900490 slicing GSRNA2T00080762001 at nt 8**

alignment score=6.5 , category=4 , p=0.00873941520404209

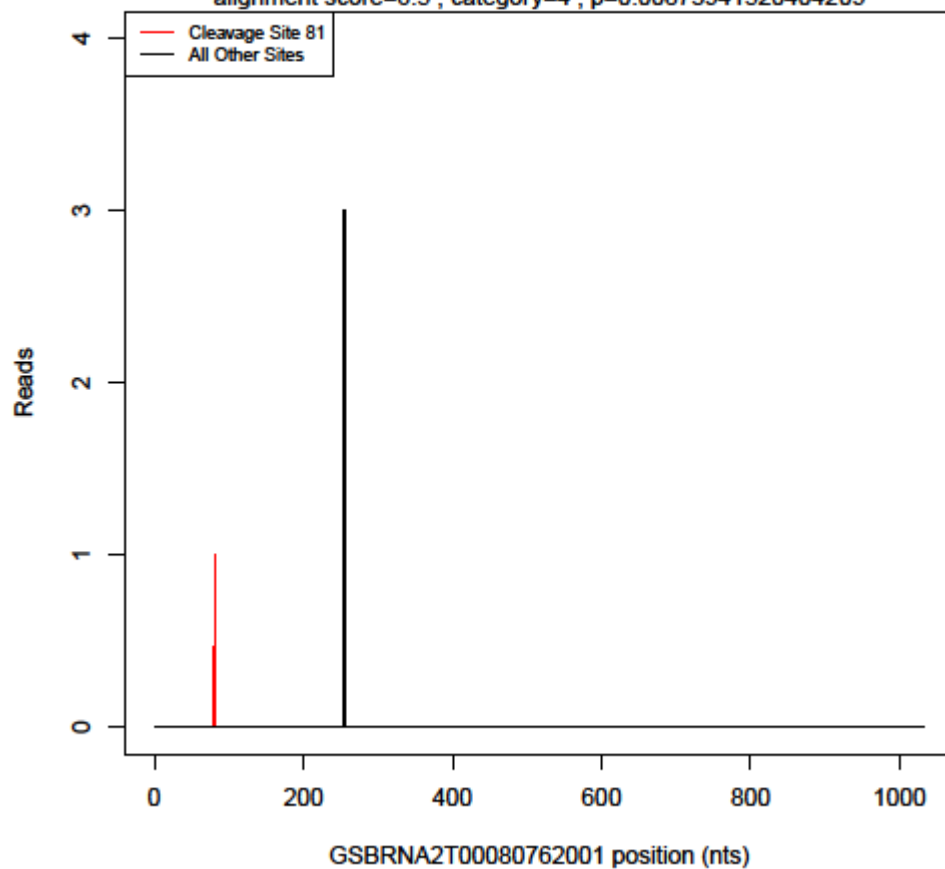

**unconservative\_chrC09\_2629961 slicing GSRNA2T00083668001 at nt 22**

alignment score=6.5 , category=2 , p=0.0042596388066134

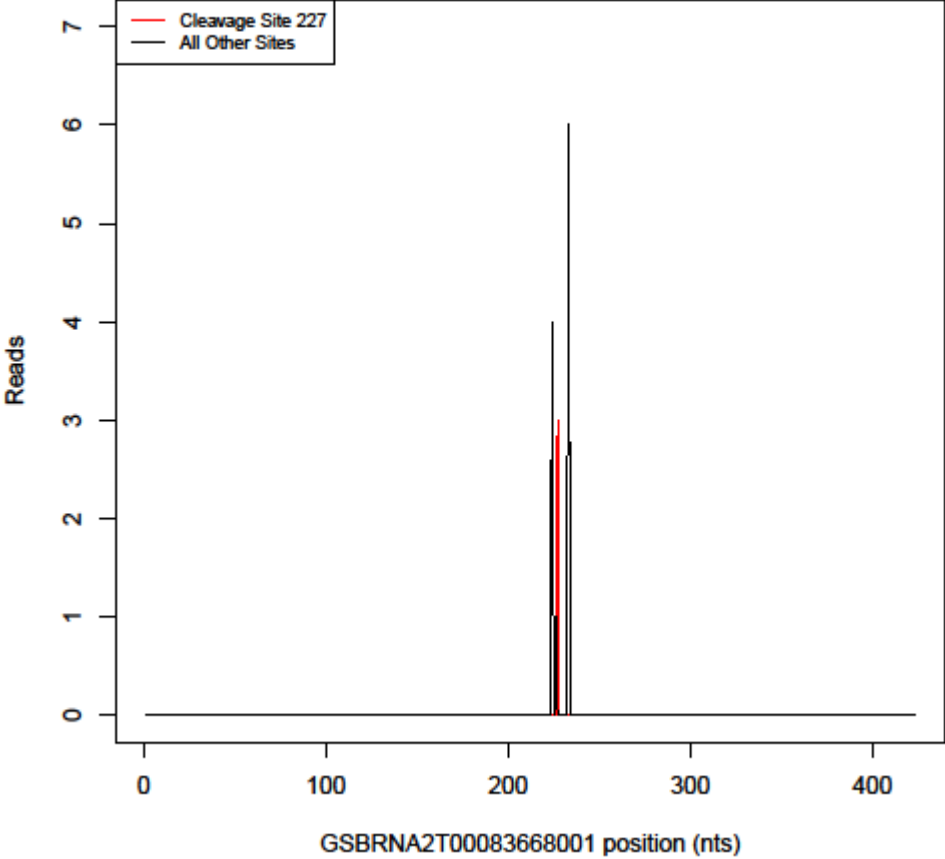

nonconservative\_chrAnn\_random\_3090809 slicing GSRNA2T00085933001 at

alignment score=7 , category=1 , p=0.00587027158071429

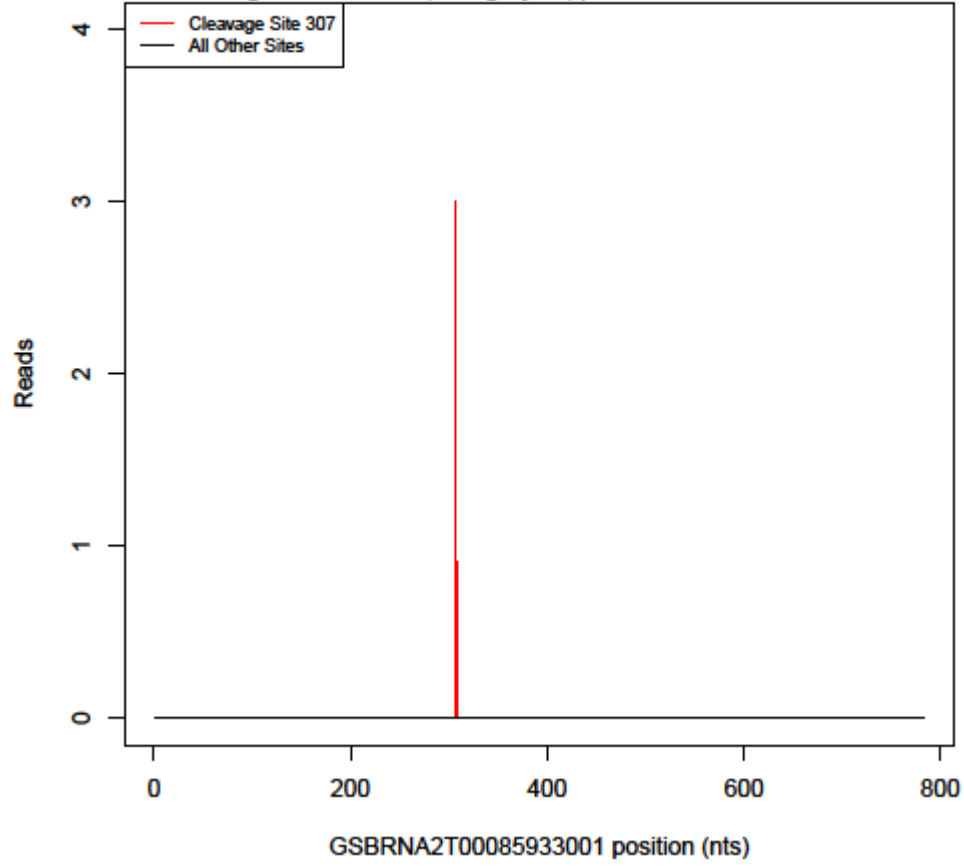

nonconservative\_chrAnn\_random\_3104496 slicing GSRNA2T00085933001 at

alignment score=7 , category=1 , p=0.00587027158071429



**unconservative\_chrC02\_1164903 slicing GSRNA2T00085933001 at nt 30**

alignment score=7 , category=1 , p=0.00587027158071429

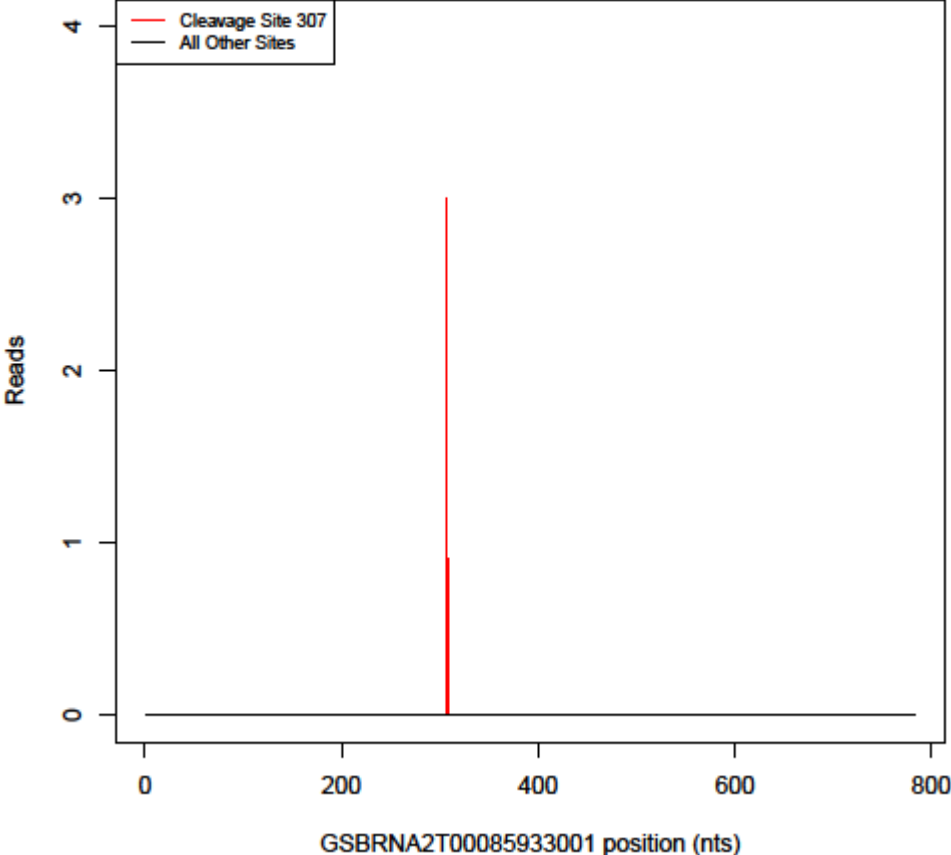



**unconservative\_chrC02\_1238925 slicing GSRNA2T00085933001 at nt 30**

alignment score=7 , category=1 , p=0.00587027158071429

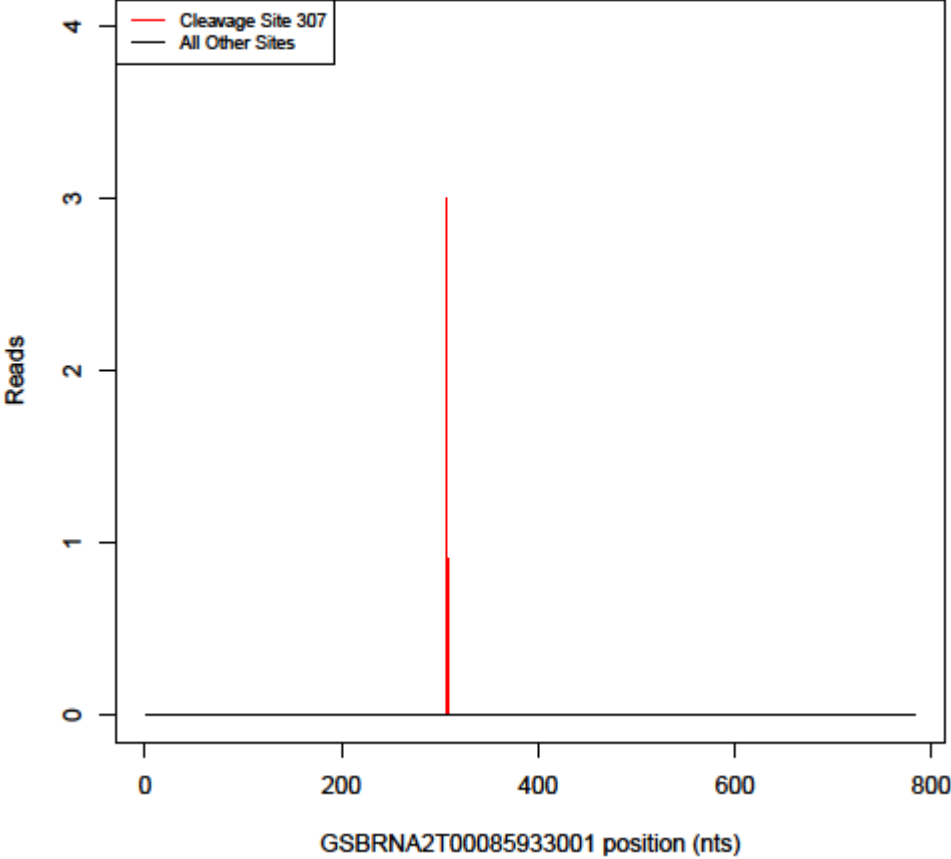

**unconservative\_chrC05\_1792327 slicing GSRNA2T00085933001 at nt 30**

alignment score=7 , category=1 , p=0.00587027158071429



nconservative\_chrC03\_random\_2851464 slicing GSRNA2T00085933001 at

alignment score=7 , category=1 , p=0.00587027158071429

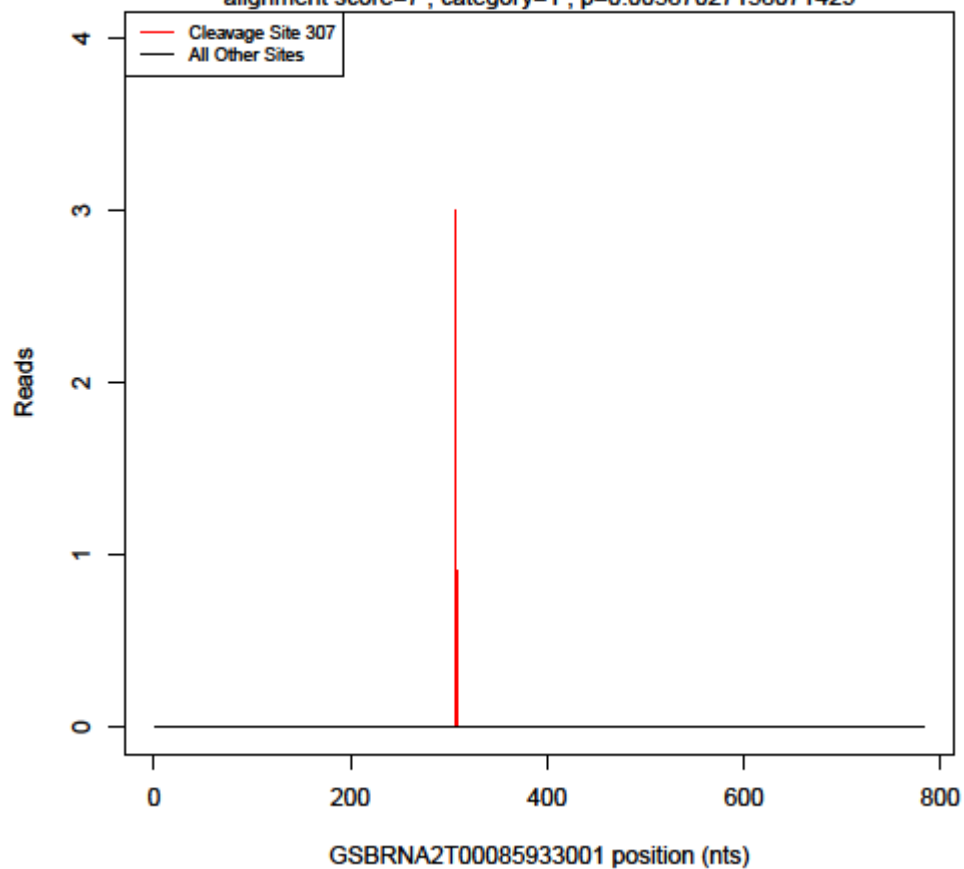

**unconservative\_chrC05\_1827956 slicing GSRNA2T00085933001 at nt 300**

alignment score=7 , category=1 , p=0.00587027158071429



**unconservative\_chrC06\_1984130 slicing GSRNA2T00085933001 at nt 30**

alignment score=7 , category=1 , p=0.00587027158071429



**unconservative\_chrC08\_2426362 slicing GSRNA2T00085933001 at nt 30**

alignment score=7 , category=1 , p=0.00587027158071429



**unconservative\_chrC09\_2597152 slicing GSRNA2T00085933001 at nt 30**

alignment score=7 , category=1 , p=0.00587027158071429



nonconservative\_chrCnn\_random\_3208488 slicing GSRNA2T00085933001 at

alignment score=7 , category=1 , p=0.00587027158071429





nonconservative\_chrCnn\_random\_3204206 slicing GSRNA2T00085933001 at

alignment score=7 , category=1 , p=0.00587027158071429



nonconservative\_chrCnn\_random\_3319893 slicing GSRNA2T00085933001 at

alignment score=7 , category=1 , p=0.00587027158071429



nonconservative\_chrCnn\_random\_3334747 slicing GSRNA2T00085933001 at

alignment score=7 , category=1 , p=0.00587027158071429



nonconservative\_chrCnn\_random\_3384748 slicing GSRNA2T00085933001 at

alignment score=7 , category=1 , p=0.00587027158071429



nonconservative\_chrCnn\_random\_3392140 slicing GSRNA2T00085933001 at

alignment score=7 , category=1 , p=0.00587027158071429



nonconservative\_chrCnn\_random\_3446945 slicing GSRNA2T00085933001 at

alignment score=7 , category=1 , p=0.00587027158071429

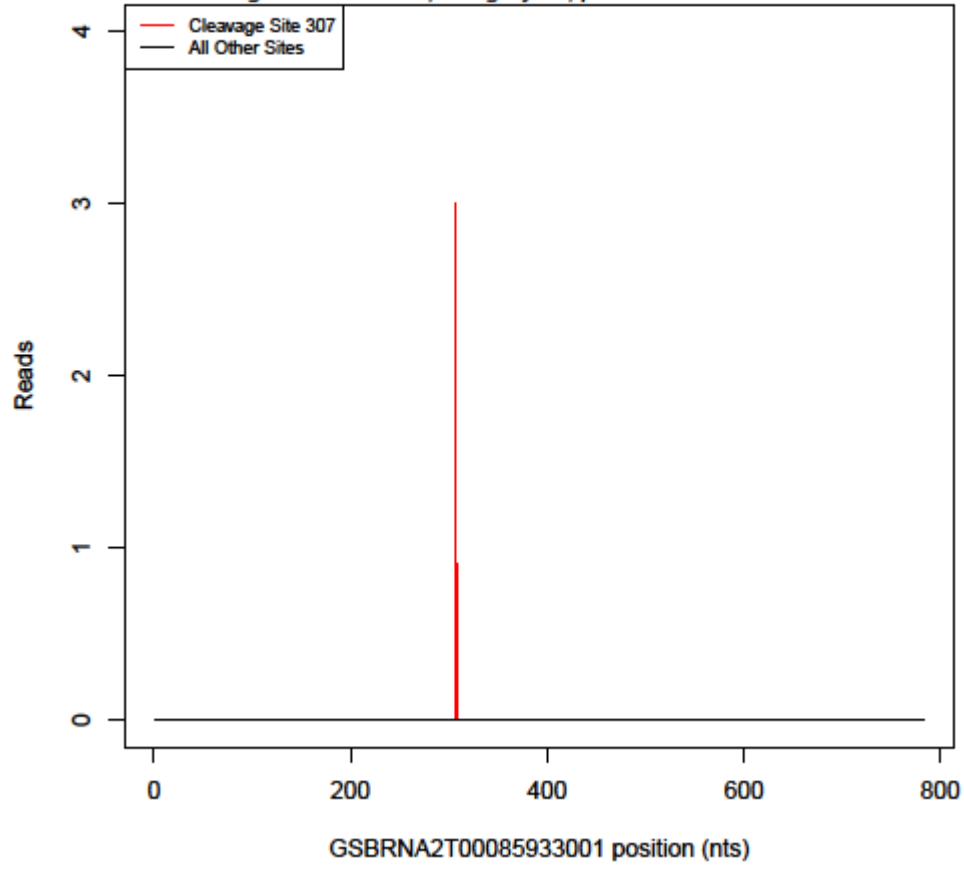

**unconservative\_chrA03\_204968 slicing GSRNA2T00095461001 at nt 31:**

alignment score=6.5 , category=0 , p=0.0475641625072505

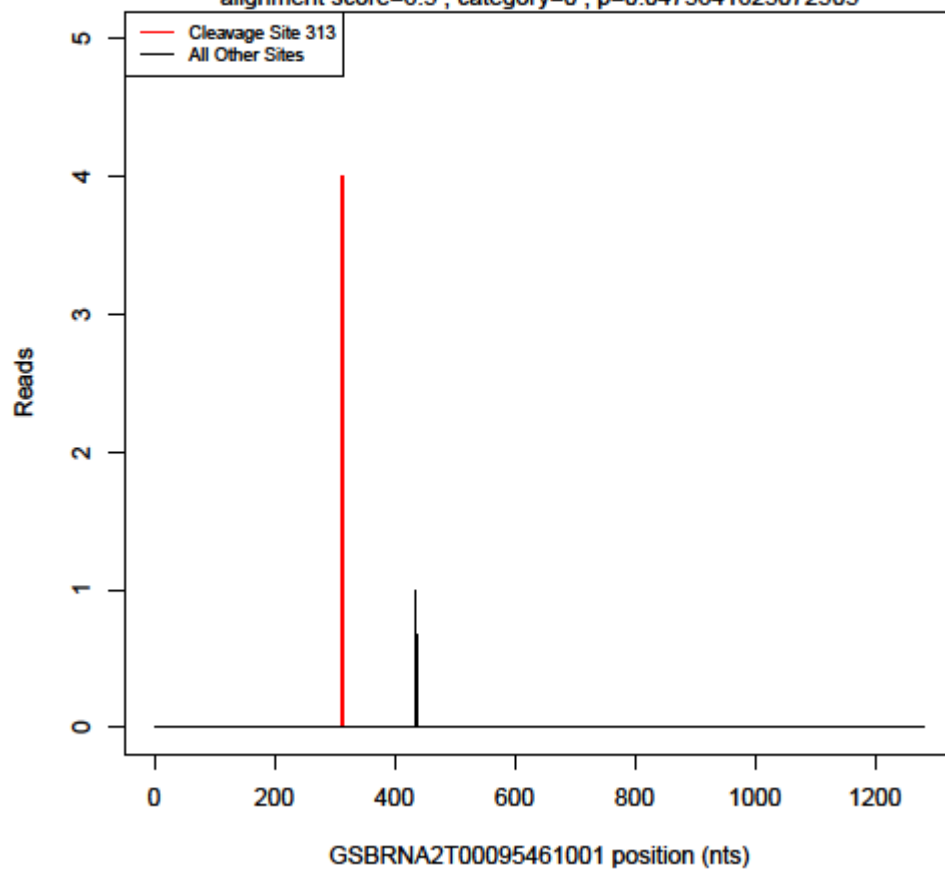

**unconservative\_chrC03\_1303408 slicing GSRNA2T00095461001 at nt 31**

alignment score=6.5 , category=0 , p=0.0476178195092687

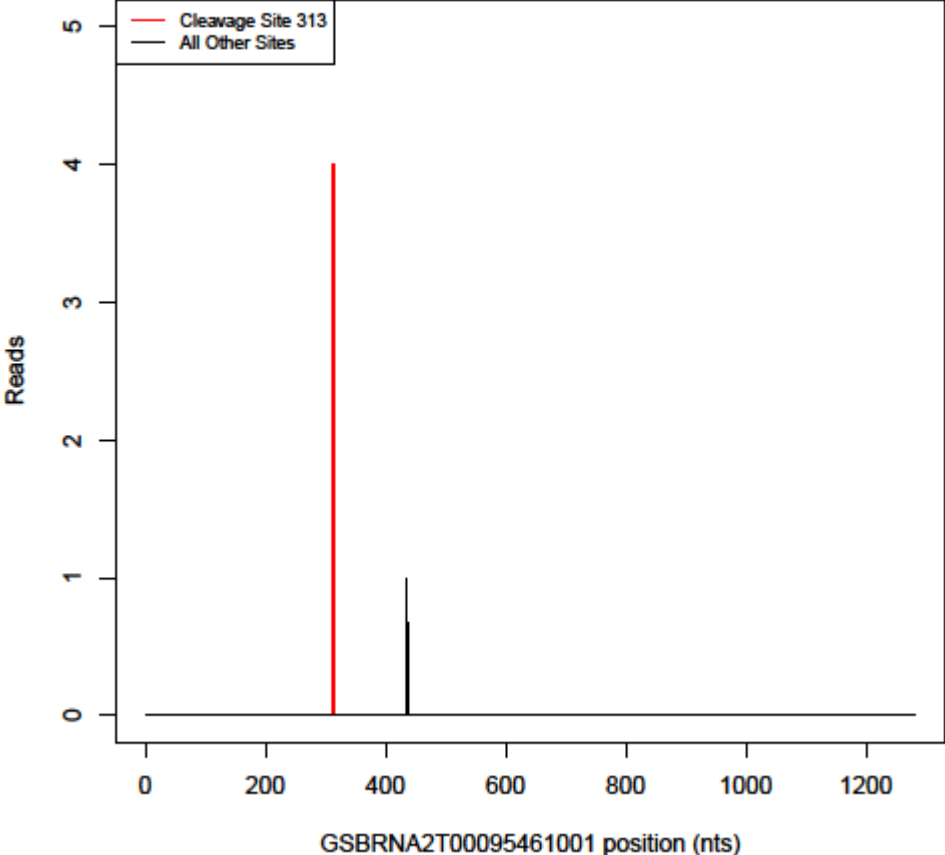



**unconservative\_chrA03\_274816 slicing GSRNA2T00097782001 at nt 25**

alignment score=4 , category=0 , p=0.00570200802339271

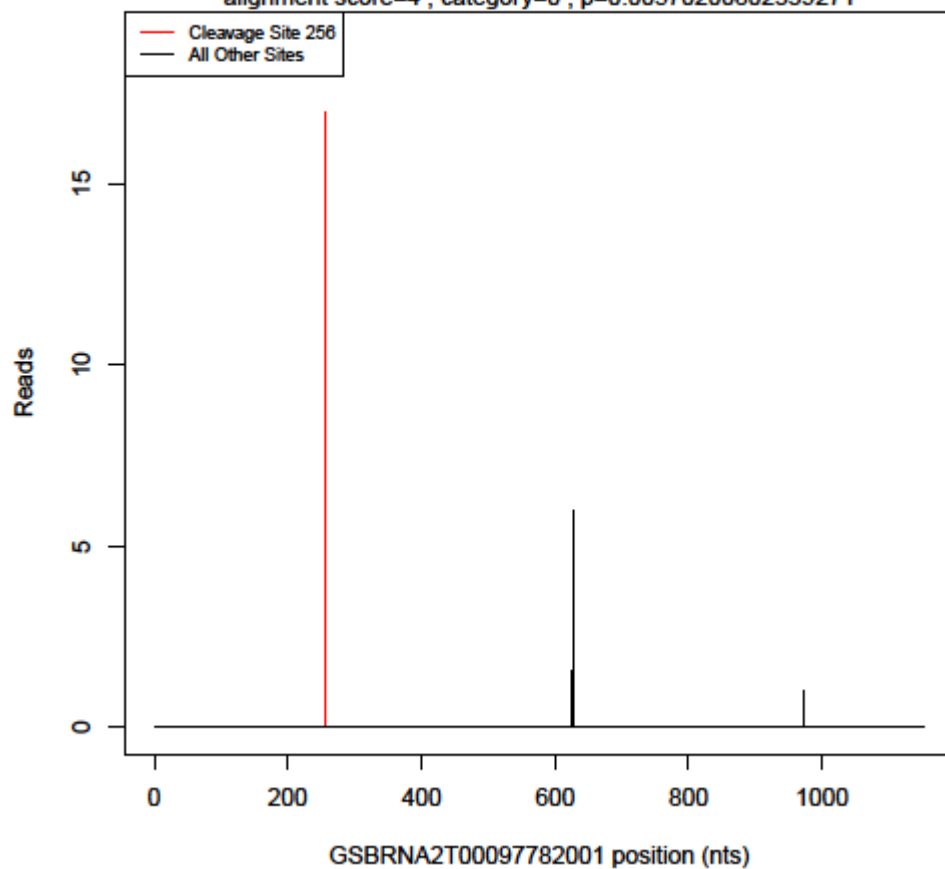

**unconservative\_chrA05\_480212 slicing GSRNA2T00097782001 at nt 25**

alignment score=4 , category=0 , p=0.00570200802339271



**unconservative\_chrA07\_648408 slicing GSRNA2T00097782001 at nt 25**

alignment score=4 , category=0 , p=0.00570200802339271



**nconservative\_chrCnn\_random\_3238853 slicing GSRNA2T00101180001 at**

alignment score=7 , category=1 , p=0.0497456572986954

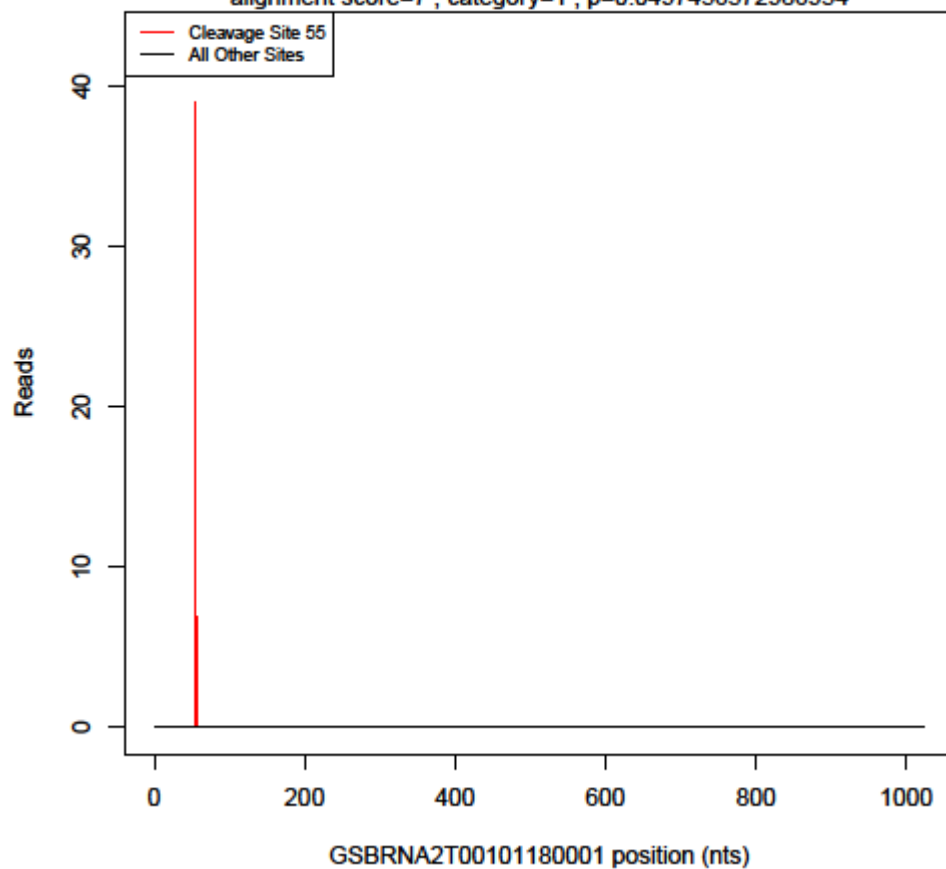

**unconservative\_chrA06\_539714 slicing GSRNA2T00102521001 at nt 22:**

alignment score=6.5 , category=4 , p=0.00121598870006601

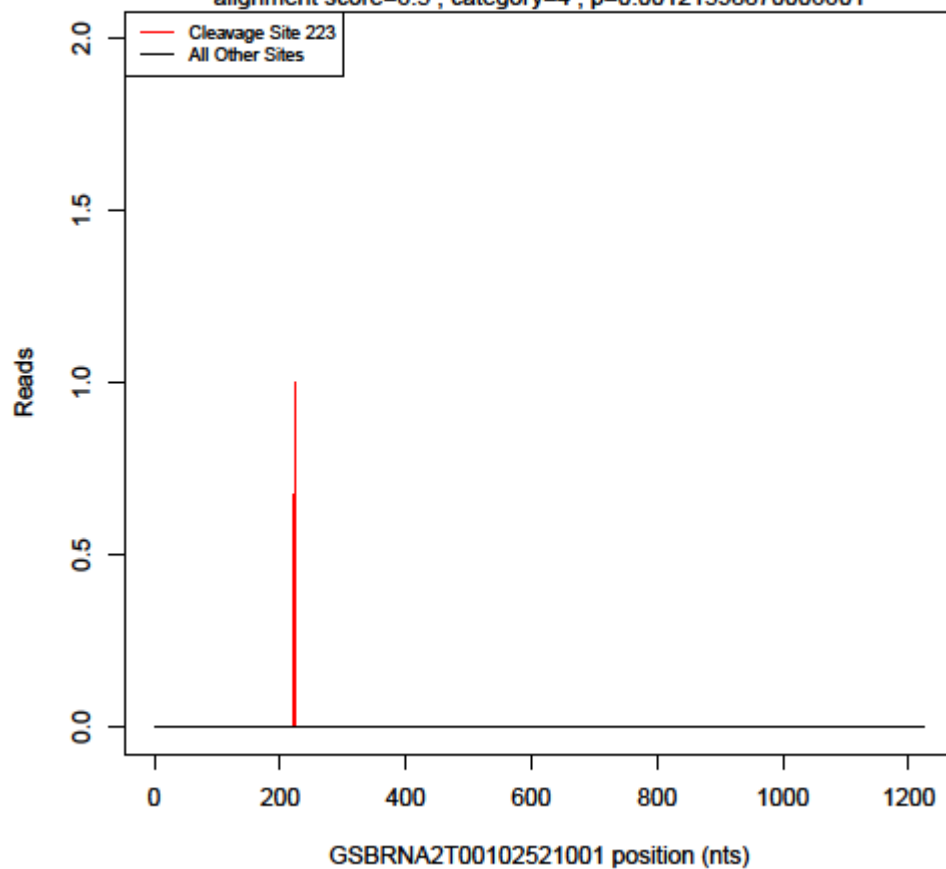

**conservative\_chrAnn\_random\_3104496 slicing GSRNA2T00104433001 at r**

alignment score=6.5 , category=4 , p=0.00511451810183794

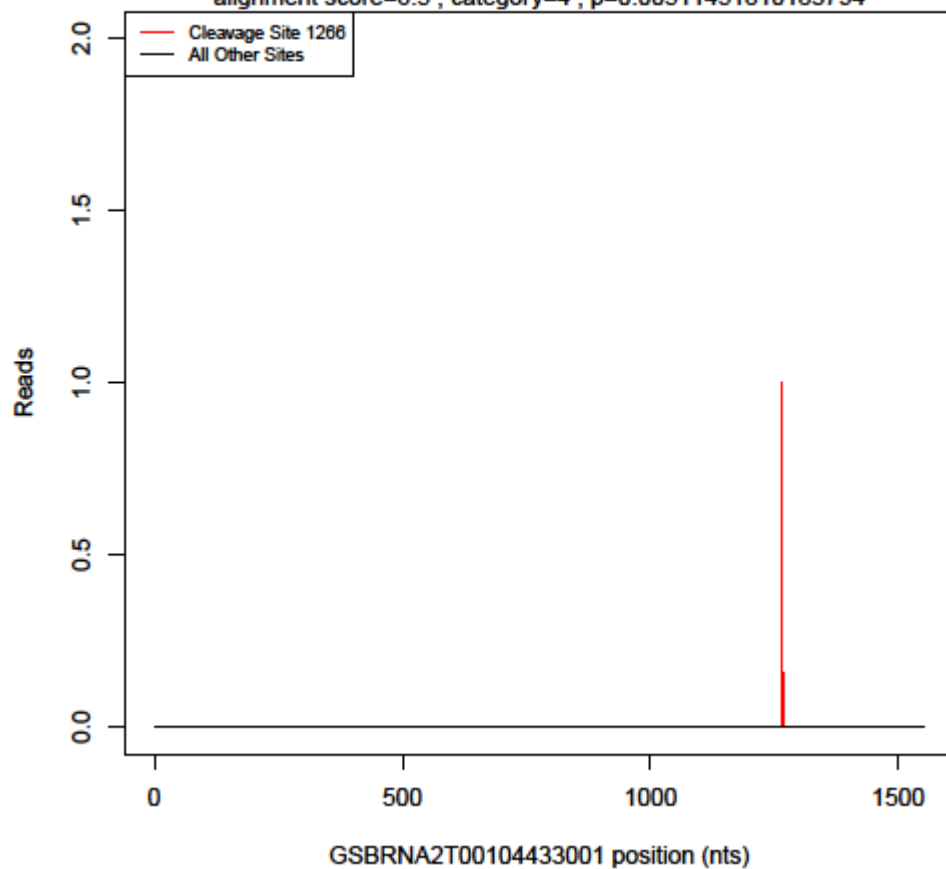

**conservative\_chrAnn\_random\_3090809 slicing GSRNA2T00104433001 at r**

alignment score=6.5 , category=4 , p=0.00511451810183794

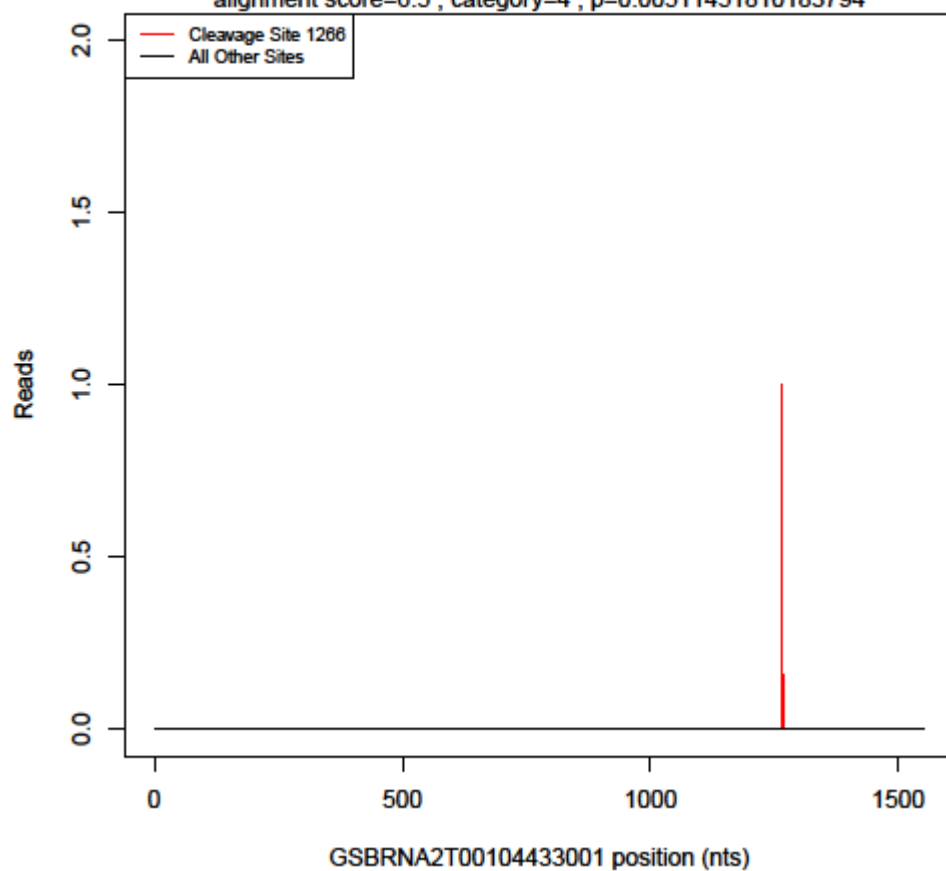

**unconservative\_chrC02\_1164903 slicing GSRNA2T00104433001 at nt 12**

alignment score=6.5 , category=4 , p=0.00511451810183794

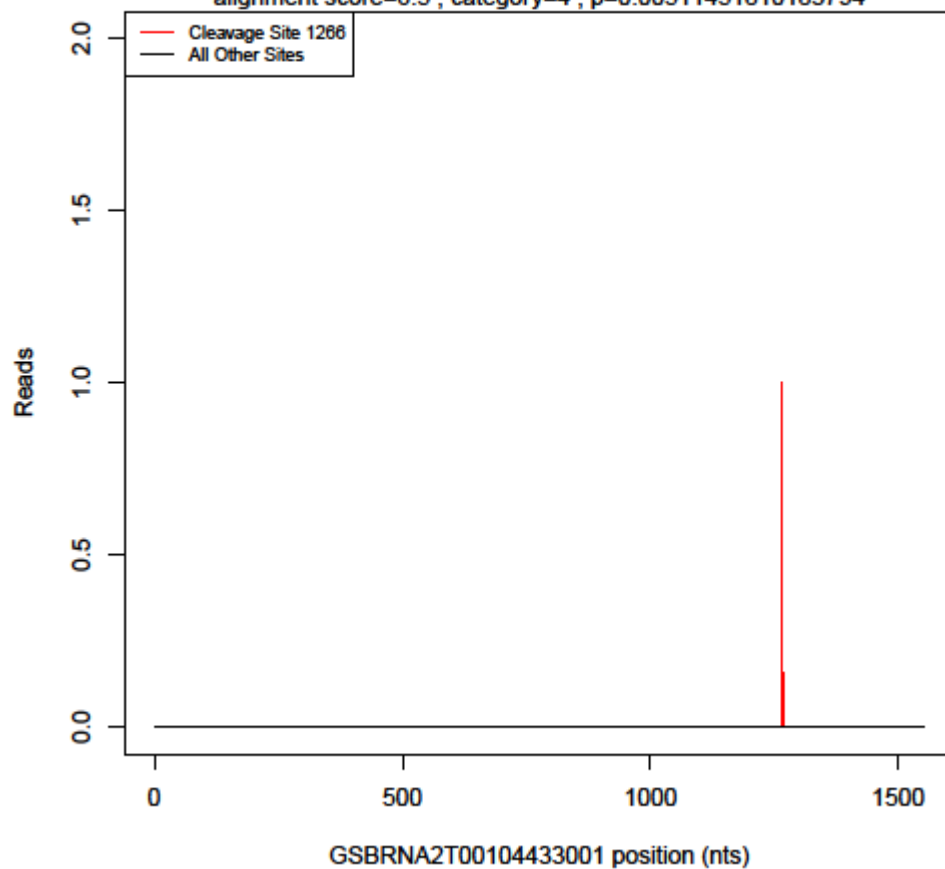



**unconservative\_chrC01\_979632 slicing GSRNA2T00104433001 at nt 126**

alignment score=6.5 , category=4 , p=0.00511451810183794

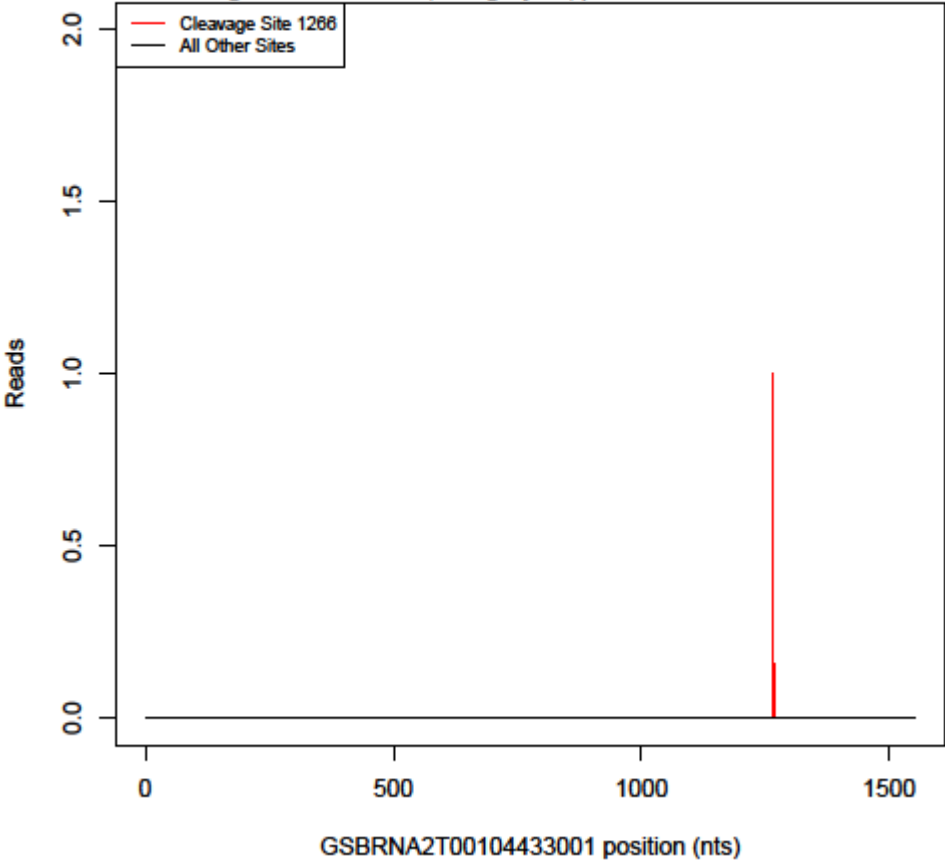

**unconservative\_chrC02\_1238925 slicing GSRNA2T00104433001 at nt 12**

alignment score=6.5 , category=4 , p=0.00511451810183794



**conservative\_chrC03\_random\_2851464 slicing GSRNA2T00104433001 at r**

alignment score=6.5 , category=4 , p=0.00511451810183794

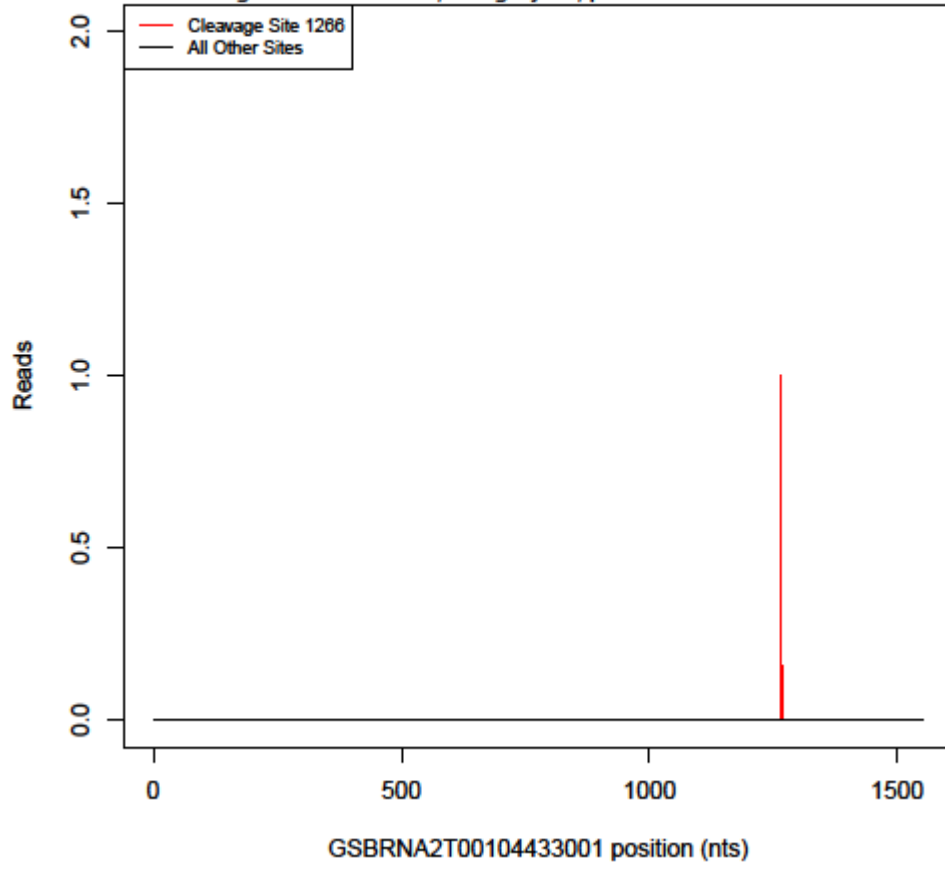

**unconservative\_chrC05\_1827956 slicing GSRNA2T00104433001 at nt 12**

alignment score=6.5 , category=4 , p=0.00511451810183794



**unconservative\_chrC06\_1984130 slicing GSRNA2T00104433001 at nt 12**

alignment score=6.5 , category=4 , p=0.00511451810183794



**unconservative\_chrC08\_2330634 slicing GSRNA2T00104433001 at nt 12**

alignment score=6.5 , category=4 , p=0.0111486728377372

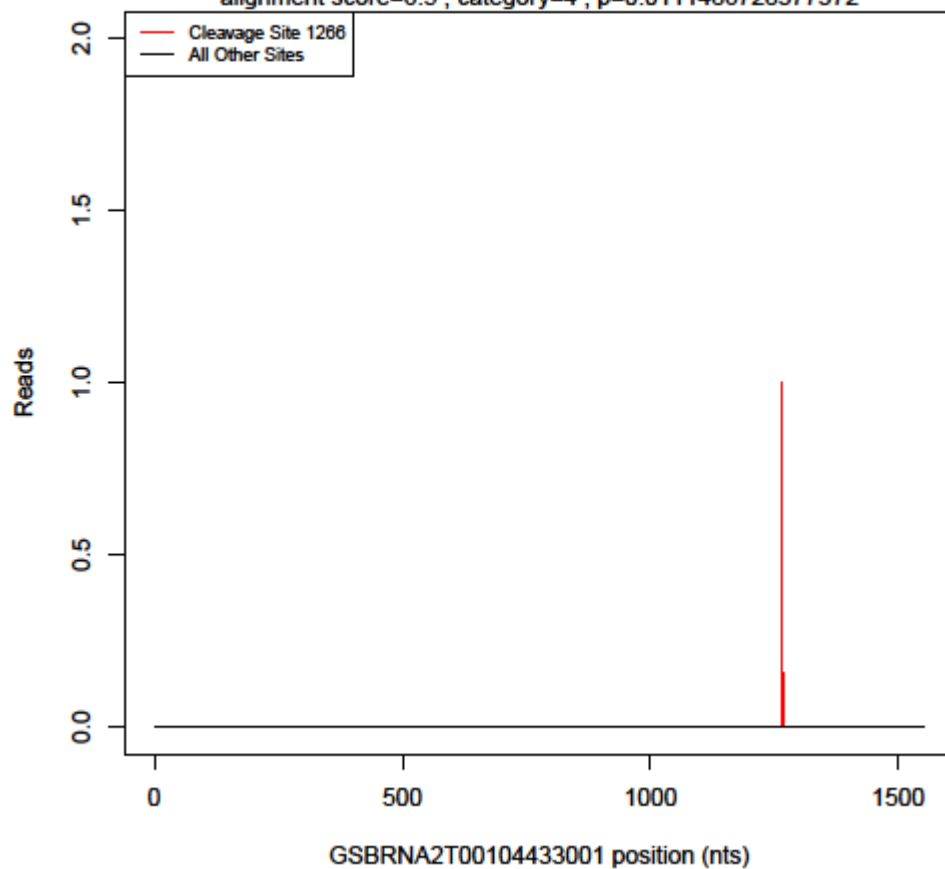

**unconservative\_chrC08\_2426362 slicing GSRNA2T00104433001 at nt 12**

alignment score=6.5 , category=4 , p=0.00511451810183794



**unconservative\_chrC09\_2597152 slicing GSRNA2T00104433001 at nt 12**

alignment score=6.5 , category=4 , p=0.00511451810183794





**conservative\_chrC09\_random\_2953705 slicing GSRNA2T00104433001 at r**

alignment score=6.5 , category=4 , p=0.00511451810183794



**unconservative\_chrC09\_2666373 slicing GSRNA2T00104433001 at nt 12**

alignment score=6.5 , category=4 , p=0.00511451810183794

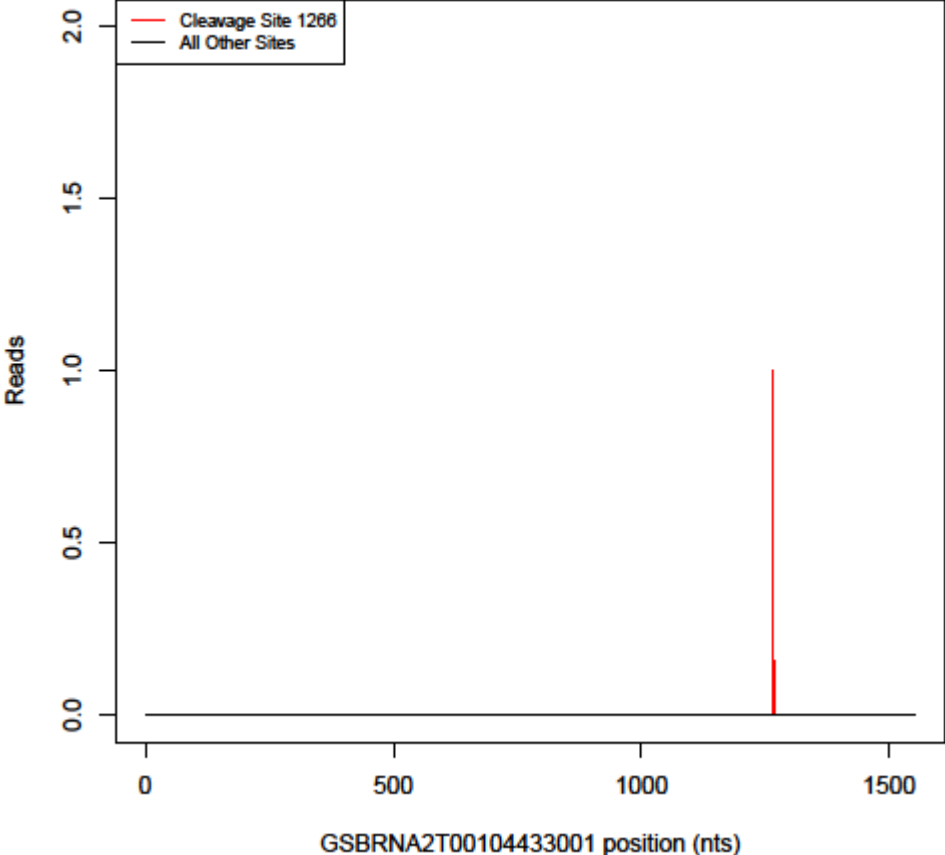

**conservative\_chrCnn\_random\_3204206 slicing GSRNA2T00104433001 at r**

alignment score=6.5 , category=4 , p=0.00511451810183794



**conservative\_chrCnn\_random\_3208488 slicing GSRNA2T00104433001 at r**

alignment score=6.5 , category=4 , p=0.00511451810183794



**conservative\_chrCnn\_random\_3238853 slicing GSRNA2T00104433001 at r**

alignment score=7 , category=4 , p=0.0376854055651397

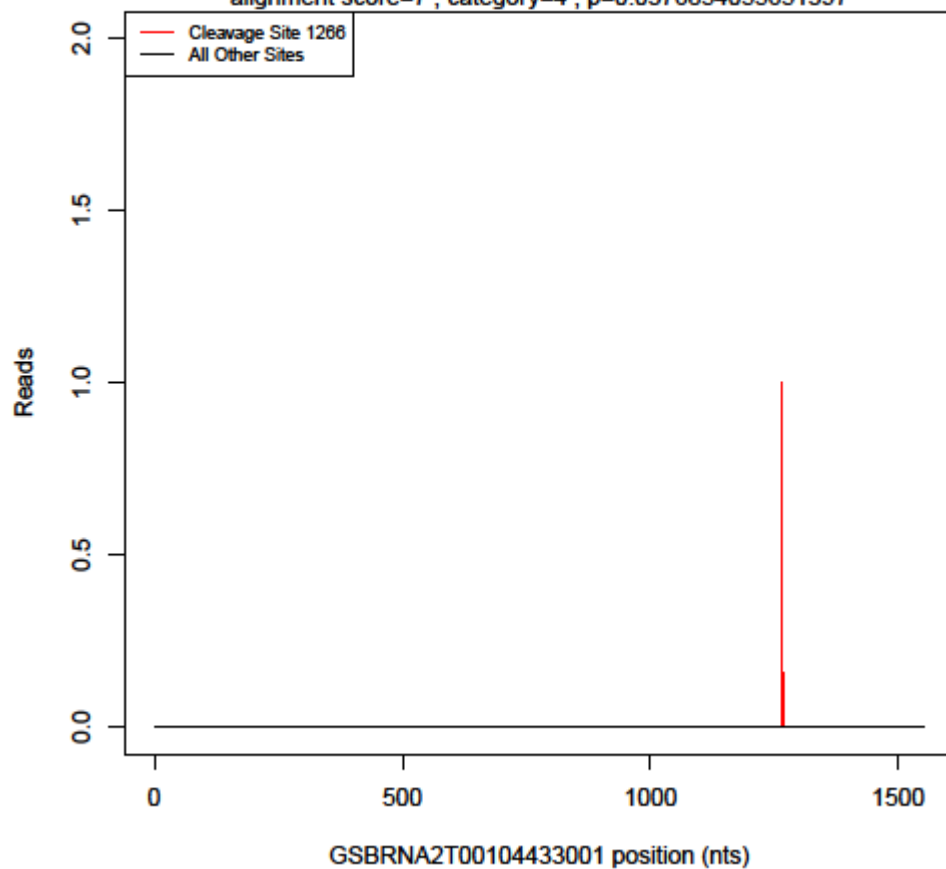

**conservative\_chrCnn\_random\_3319893 slicing GSRNA2T00104433001 at r**

alignment score=6.5 , category=4 , p=0.00511451810183794



**conservative\_chrCnn\_random\_3334747 slicing GSRNA2T00104433001 at r**

alignment score=6.5 , category=4 , p=0.00511451810183794



**conservative\_chrCnn\_random\_3384748 slicing GSRNA2T00104433001 at r**

alignment score=6.5 , category=4 , p=0.00511451810183794





**conservative\_chrCnn\_random\_3446945 slicing GSRNA2T00104433001 at r**

alignment score=6.5 , category=4 , p=0.00511451810183794



**unconservative\_chrA03\_204968 slicing GSRNA2T00106018001 at nt 42**

alignment score=5 , category=1 , p=0.0351543959671605

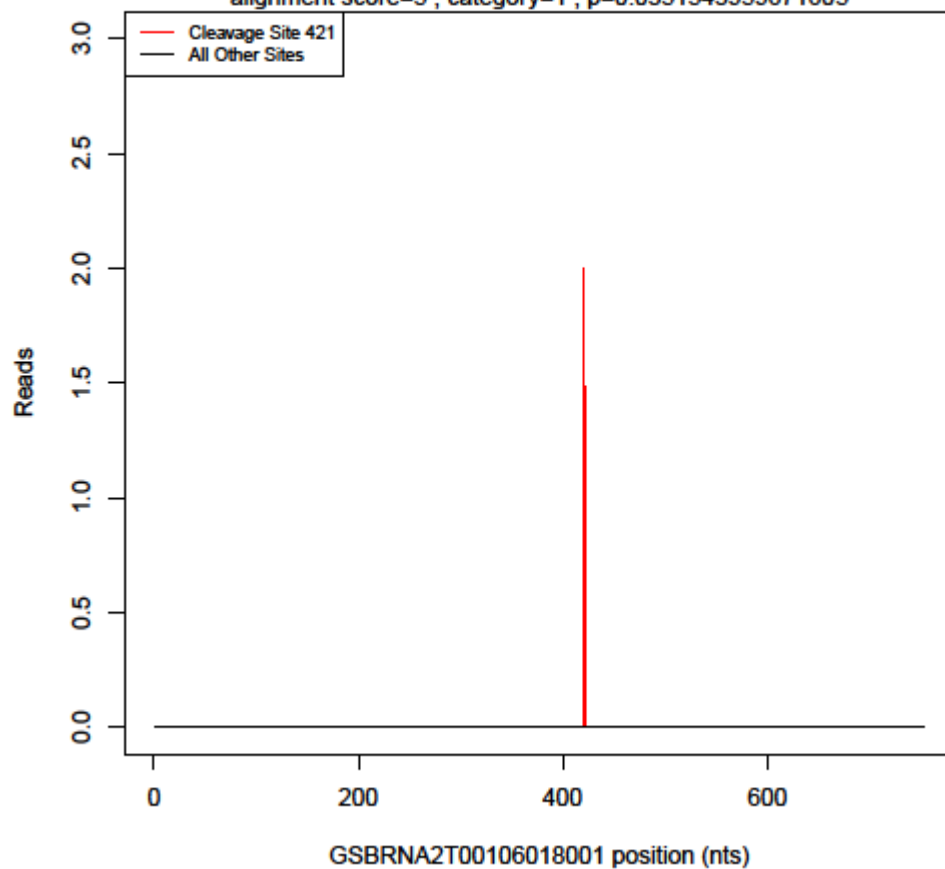

**unconservative\_chrC03\_1303408 slicing GSRNA2T00106018001 at nt 42**

alignment score=5 , category=1 , p=0.0354328163475444

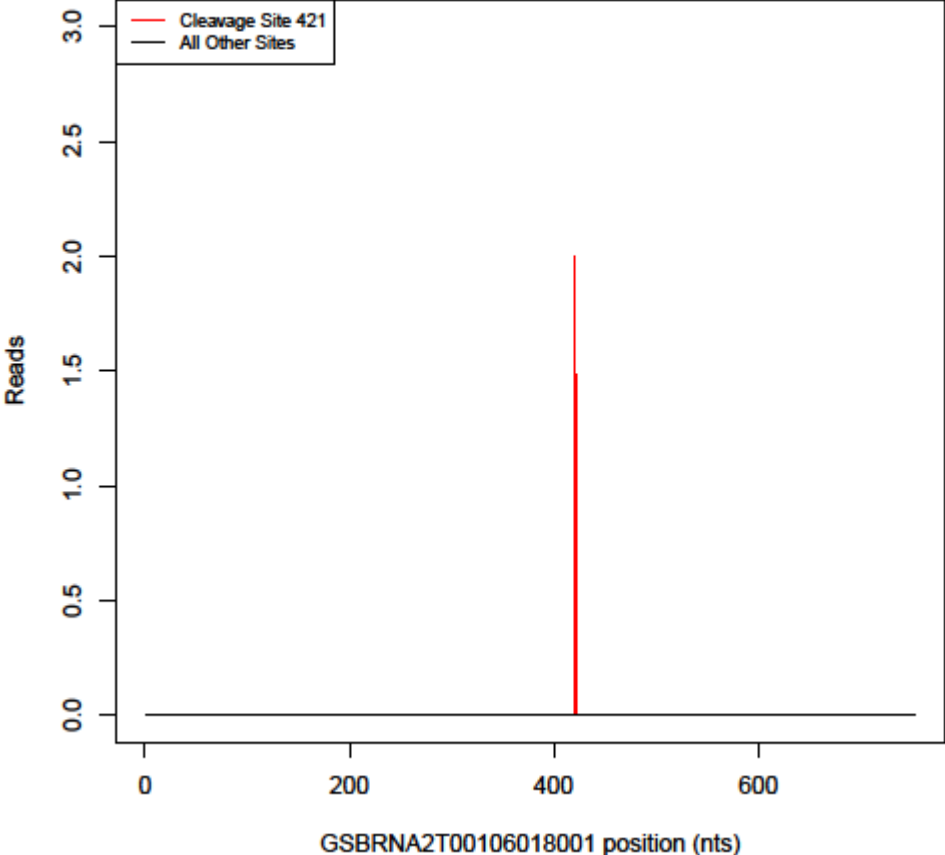

**unconservative\_chrA05\_480212 slicing GSRNA2T00108889001 at nt 21**

alignment score=4 , category=0 , p=0.00570200802339271

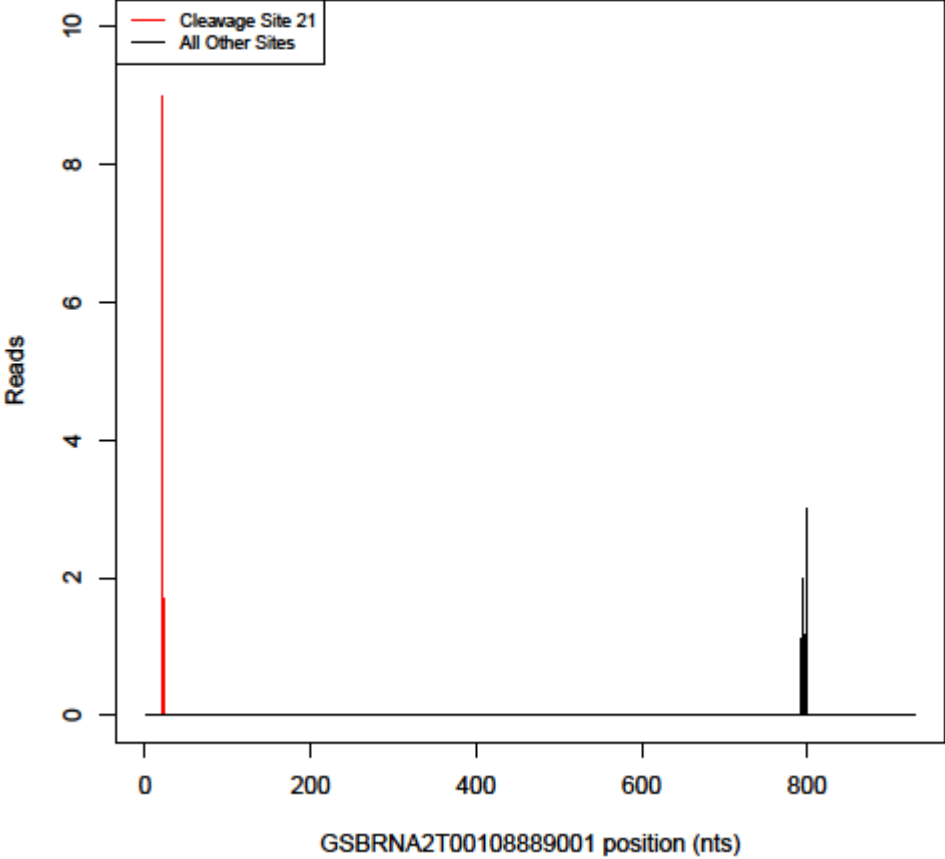

**unconservative\_chrA03\_274816 slicing GSRNA2T00108889001 at nt 21**

alignment score=4 , category=0 , p=0.00570200802339271



**unconservative\_chrA07\_648408 slicing GSRNA2T00108889001 at nt 21**

alignment score=4 , category=0 , p=0.00570200802339271



**bna-miR394a slicing GSRNA2T00110103001 at nt 307**

alignment score=7 , category=4 , p=0.0245496599635258

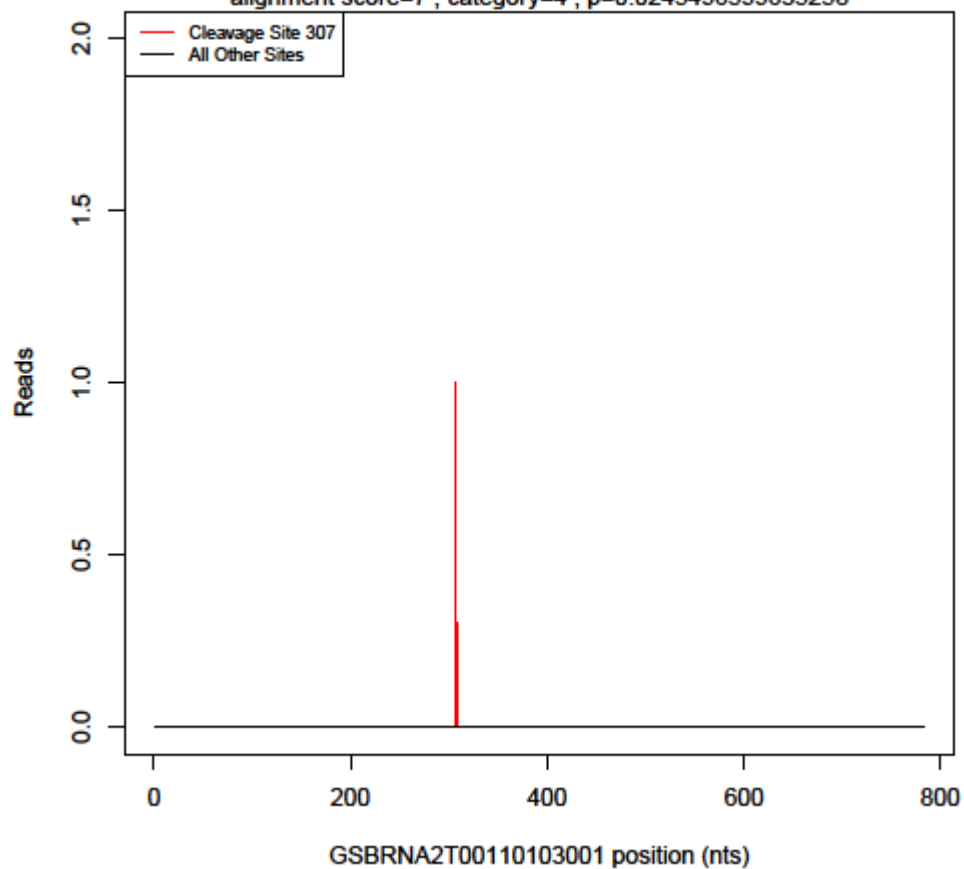

**unconservative\_chrA07\_677856 slicing GSRNA2T00108889001 at nt 21**

alignment score=4 , category=0 , p=0.00570200802339271





**conservative\_chrAnn\_random\_3007215 slicing GSRNA2T00110162001 at r**

alignment score=6 , category=1 , p=0.00999323313668787

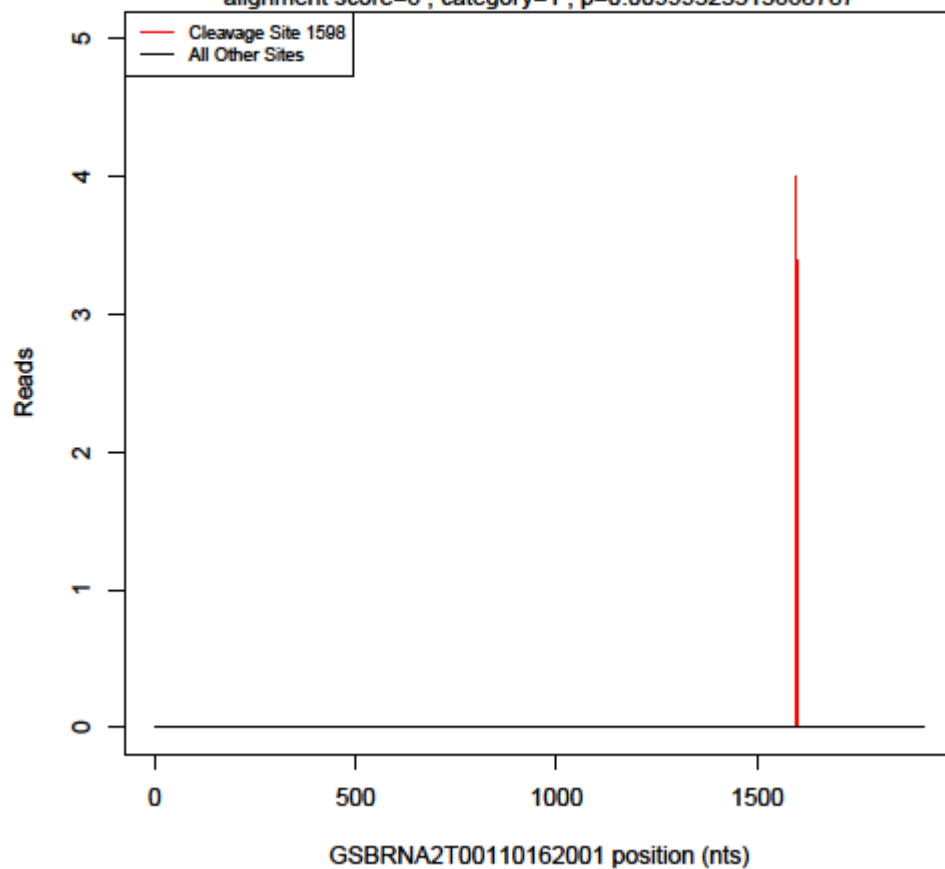

nonconservative\_chrAnn\_random\_3000993 slicing GSRNA2T00111014001 at

alignment score=6 , category=0 , p=0.0296365575902489

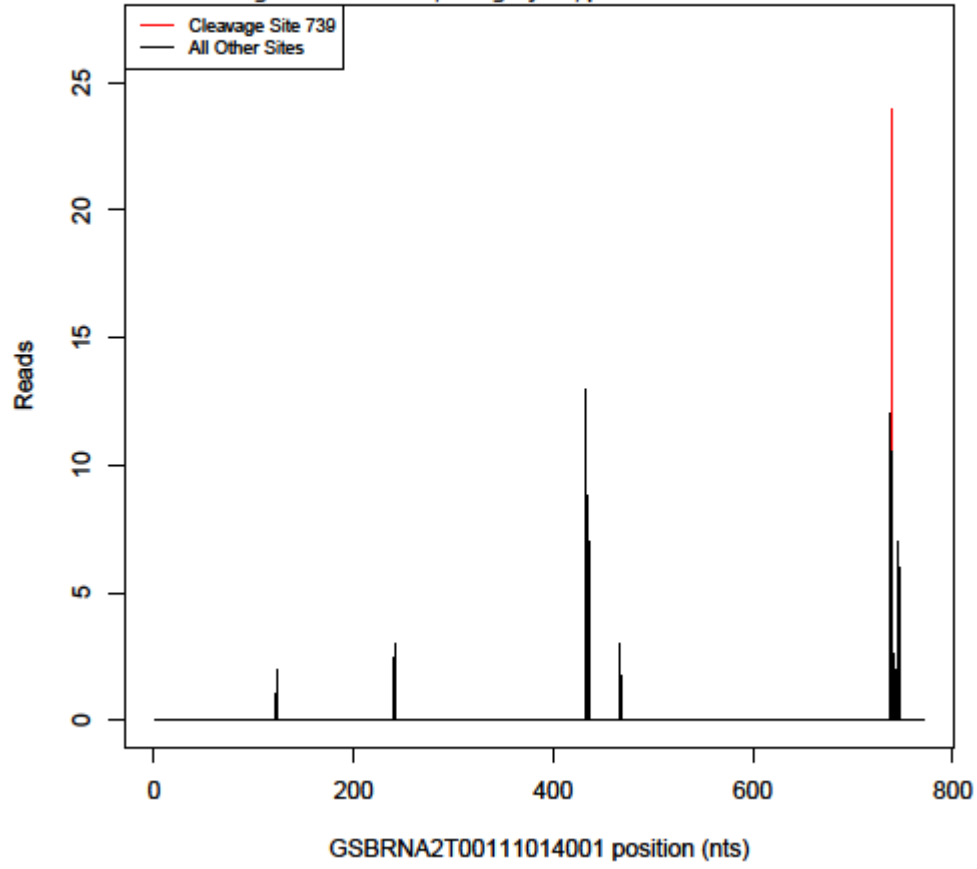

**bna-miR169n slicing GSRNA2T00110653001 at nt 82**

alignment score=7 , category=4 , p=0.00576279196120932

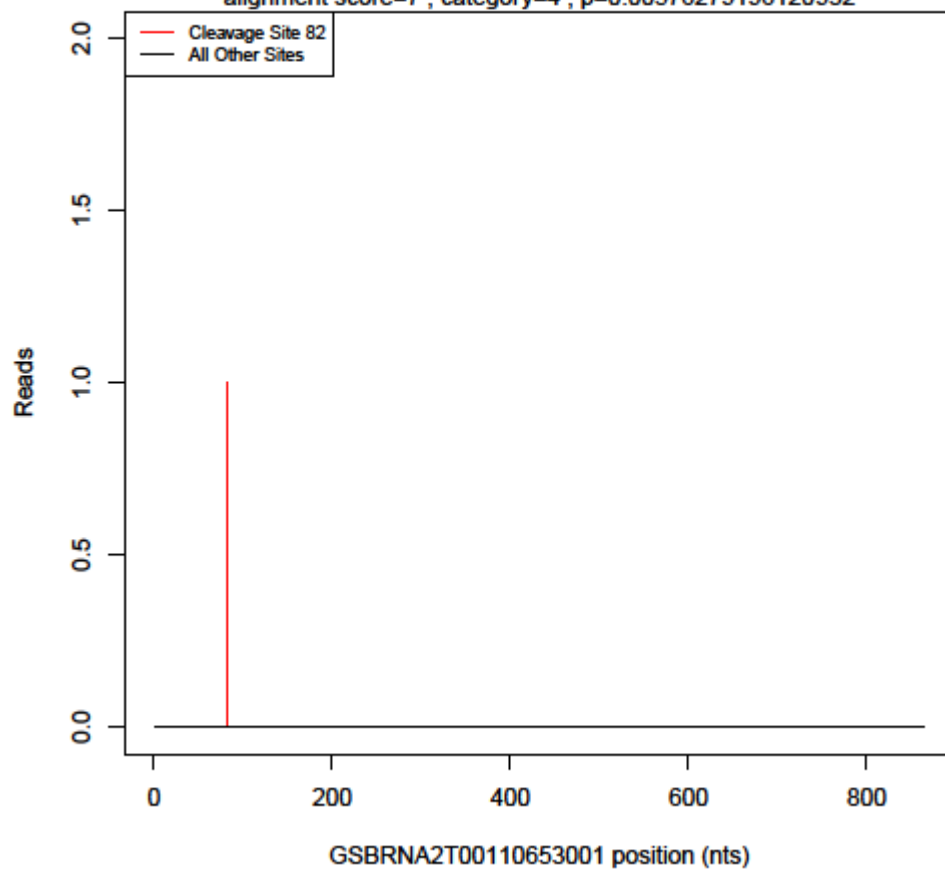

nonconservative\_chrAnn\_random\_3000993 slicing GSRNA2T00111014001 at

alignment score=6 , category=0 , p=0.0296365575902489



conservative\_chrAnn\_random\_3000995 slicing GSRNA2T00111014001 at

alignment score=6 , category=0 , p=0.0296365575902489



conservative\_chrAnn\_random\_3000993 slicing GSRNA2T00114316001 at

alignment score=7 , category=0 , p=0.0260765893445914

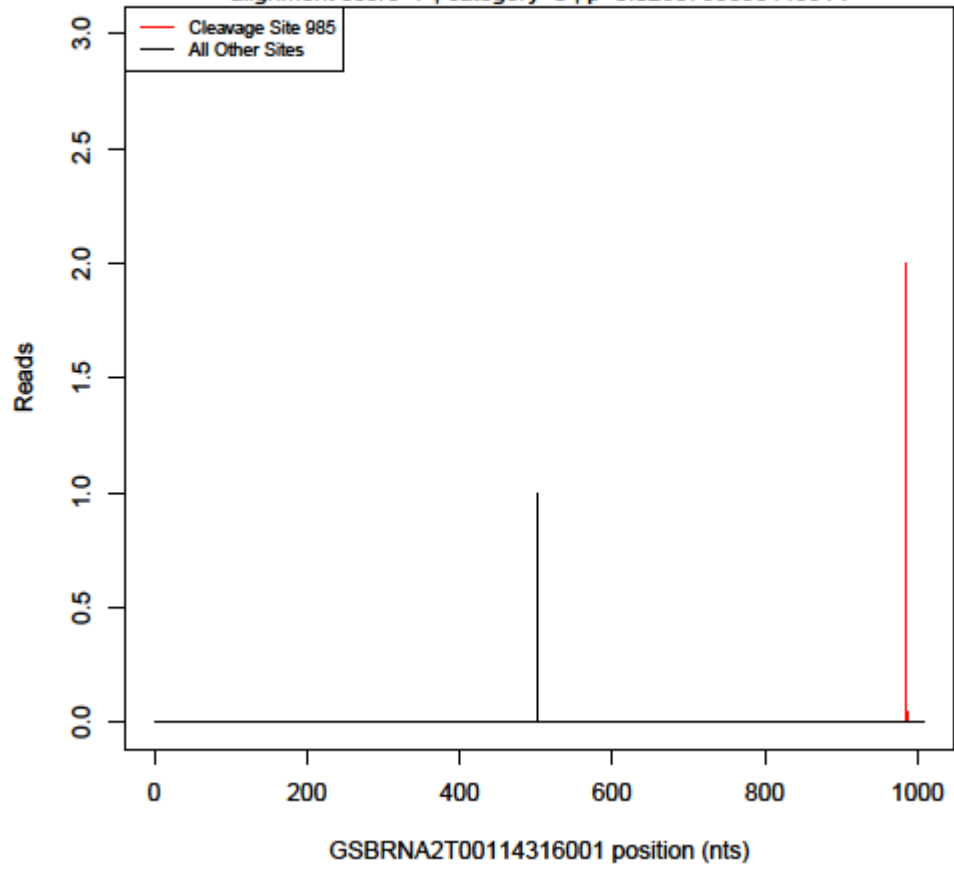

conservative\_chrAnn\_random\_3000995 slicing GSRNA2T00114316001 at

alignment score=7 , category=0 , p=0.0260765893445914

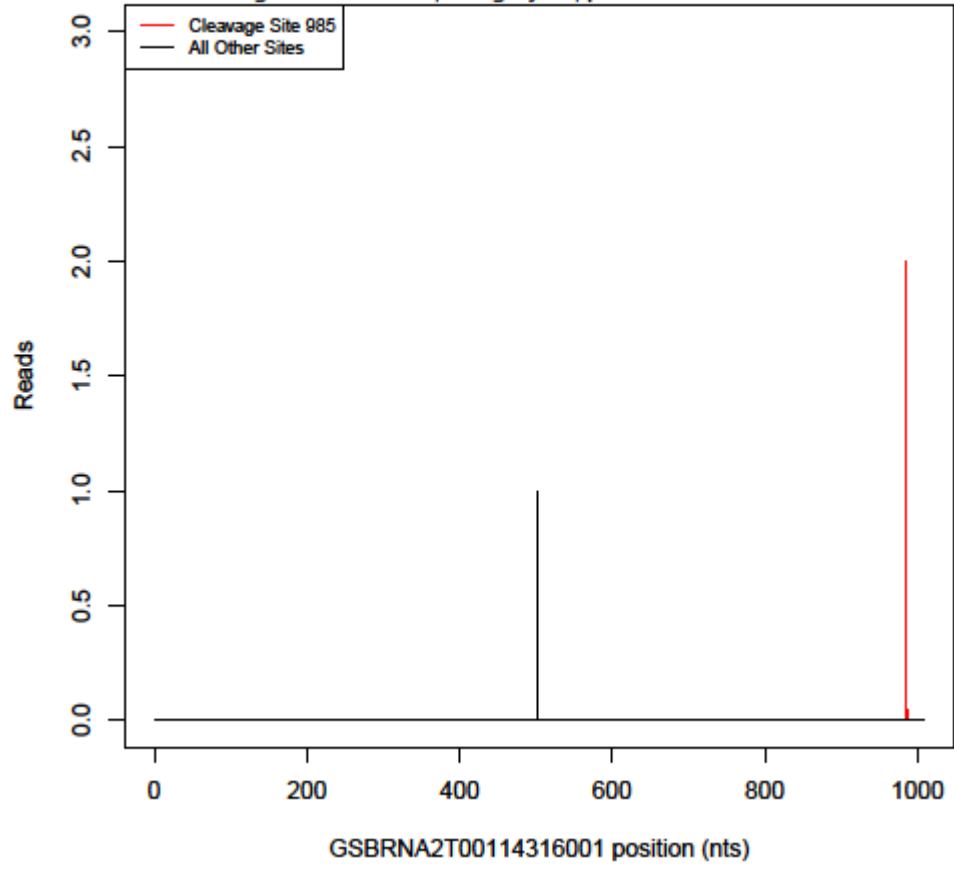

nconservative\_chrC04\_random\_2867761 slicing GSRNA2T00121922001 at

alignment score=6 , category=1 , p=0.00380235636505533

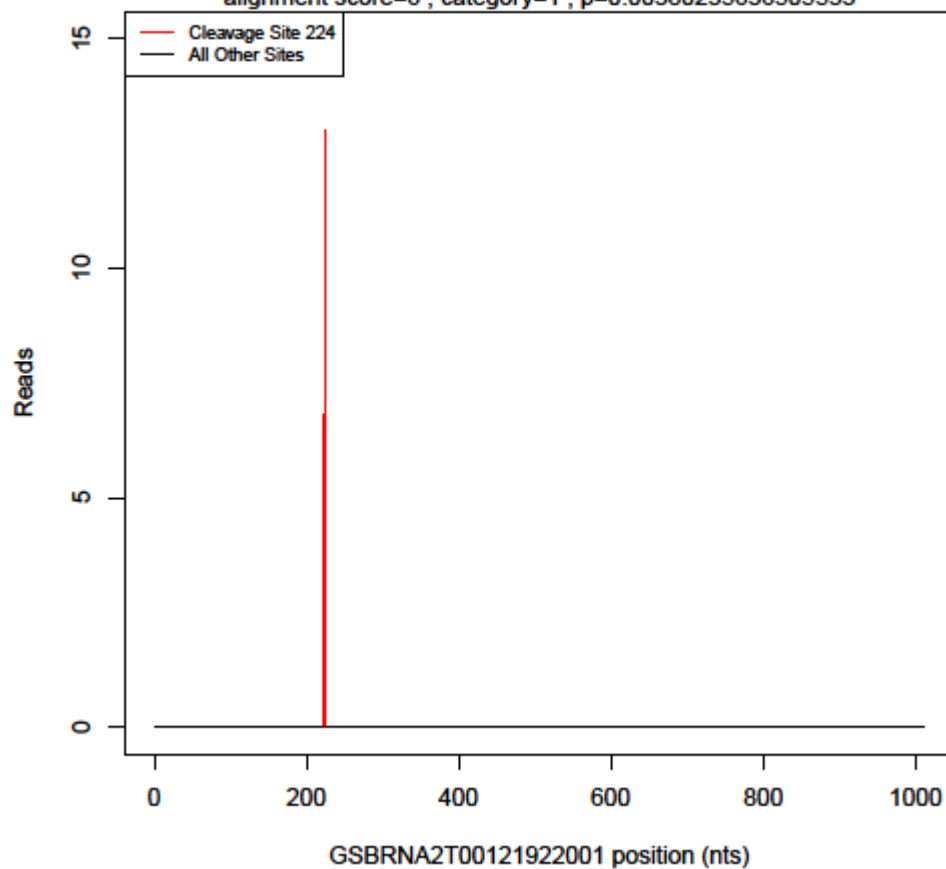



**unconservative\_chrC07\_2202684 slicing GSRNA2T00121922001 at nt 22**

alignment score=6 , category=1 , p=0.00380235636505533

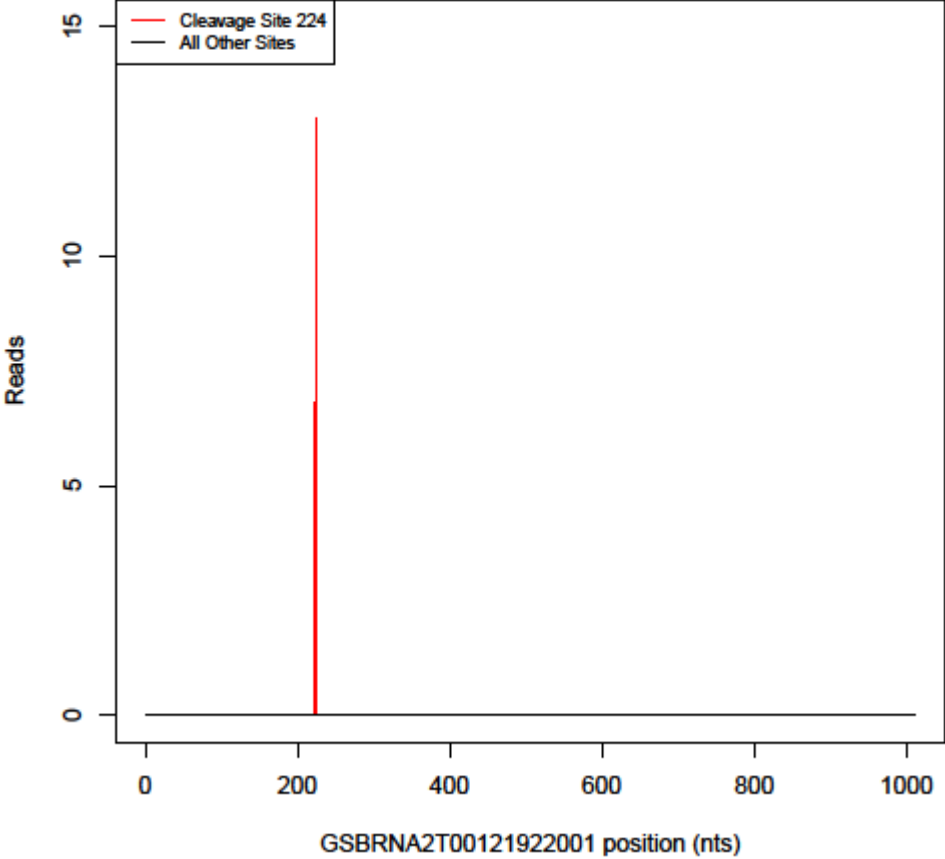

**unconservative\_chrA05\_480212 slicing GSRNA2T00122827001 at nt 70:**

alignment score=6.5 , category=3 , p=0.0117949964792858

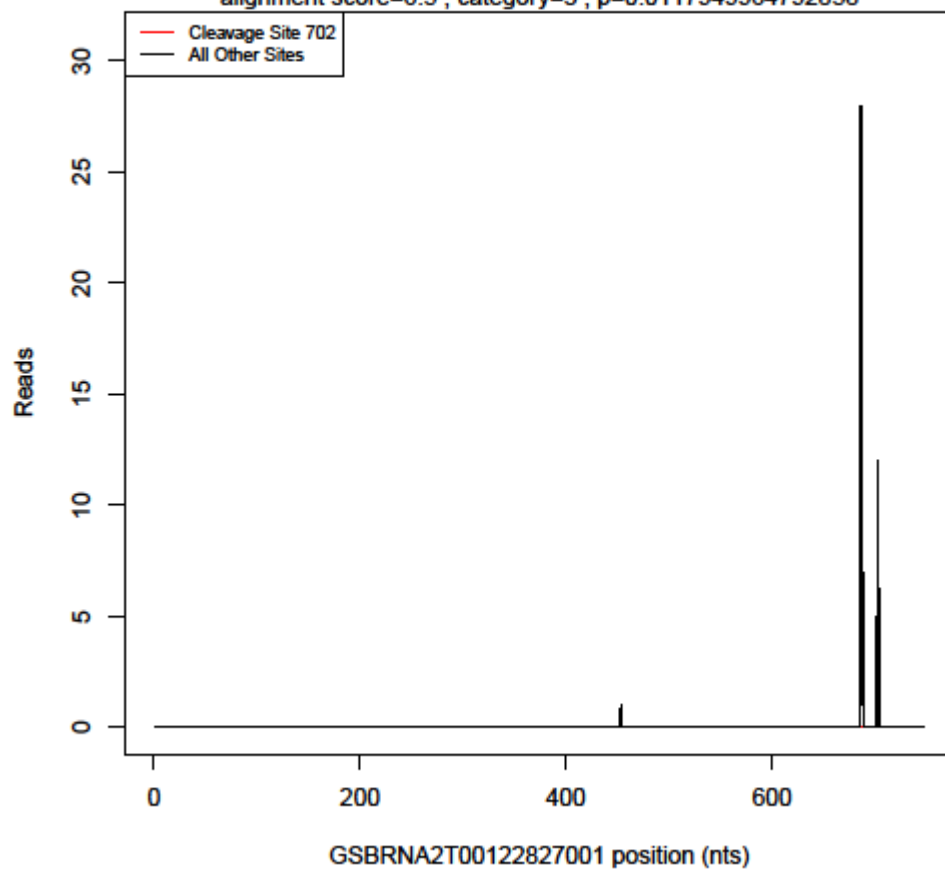

**unconservative\_chrA07\_648408 slicing GSRNA2T00122827001 at nt 70:**

alignment score=6.5 , category=3 , p=0.0117949964792858



**unconservative\_chrA07\_677856 slicing GSRNA2T00122827001 at nt 70:**

alignment score=6.5 , category=3 , p=0.0117949964792858



nonconservative\_chrCnn\_random\_3238853 slicing GSRNA2T00122970001 at

alignment score=6 , category=4 , p=0.042482363495455

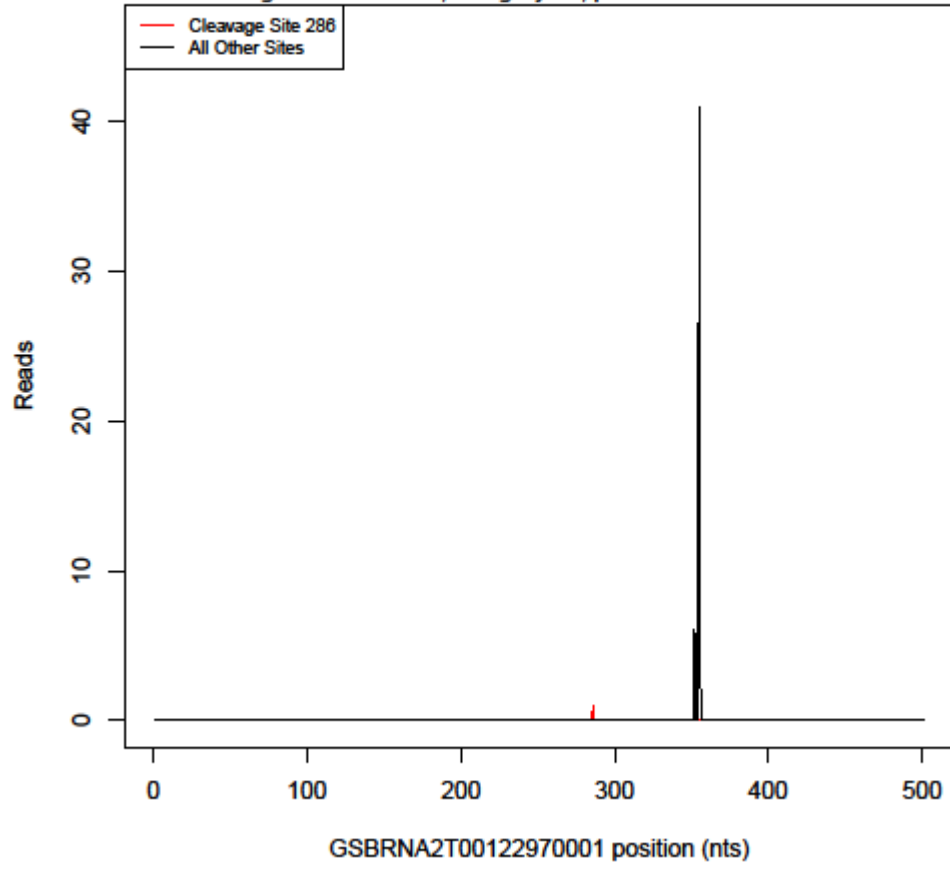

**unconservative\_chrC08\_2324612 slicing GSRNA2T00124695001 at nt 38**

alignment score=6 , category=1 , p=0.0106787290560685

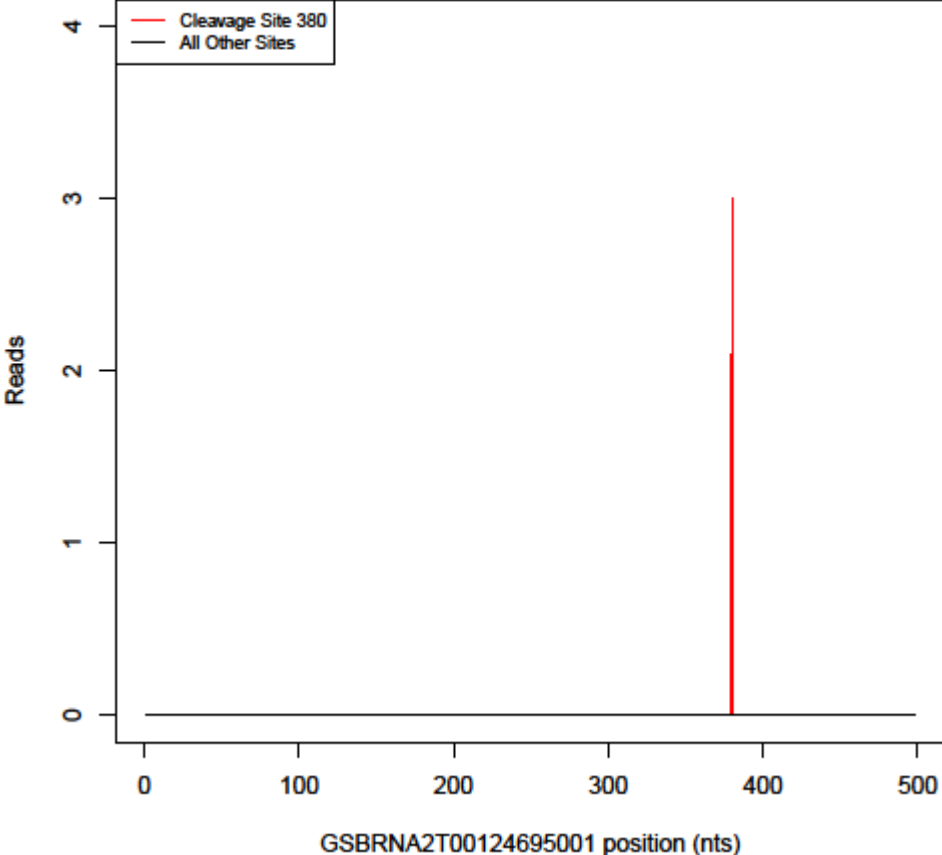

**conservative\_chrCnn\_random\_3238853 slicing GSRNA2T00125745001 at r**

alignment score=7 , category=1 , p=0.0497456572986954

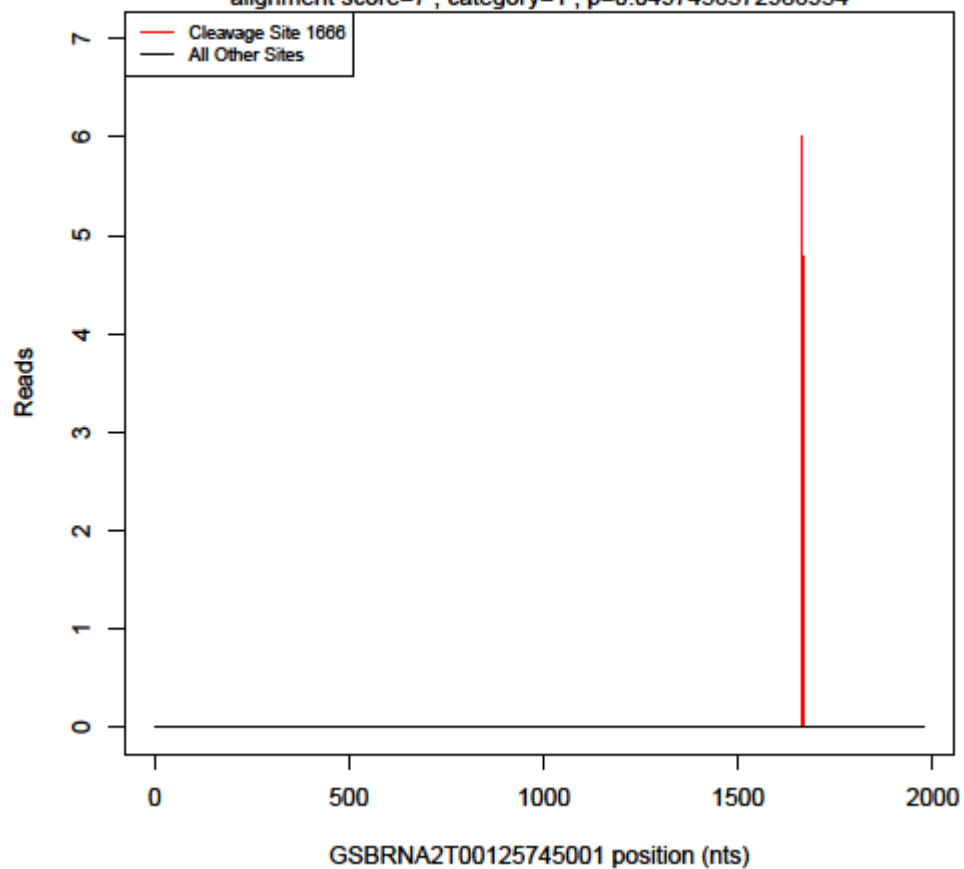

**unconservative\_chrA07\_648408 slicing GSRNA2T00136074001 at nt 137**

alignment score=6 , category=2 , p=0.0443121556867767

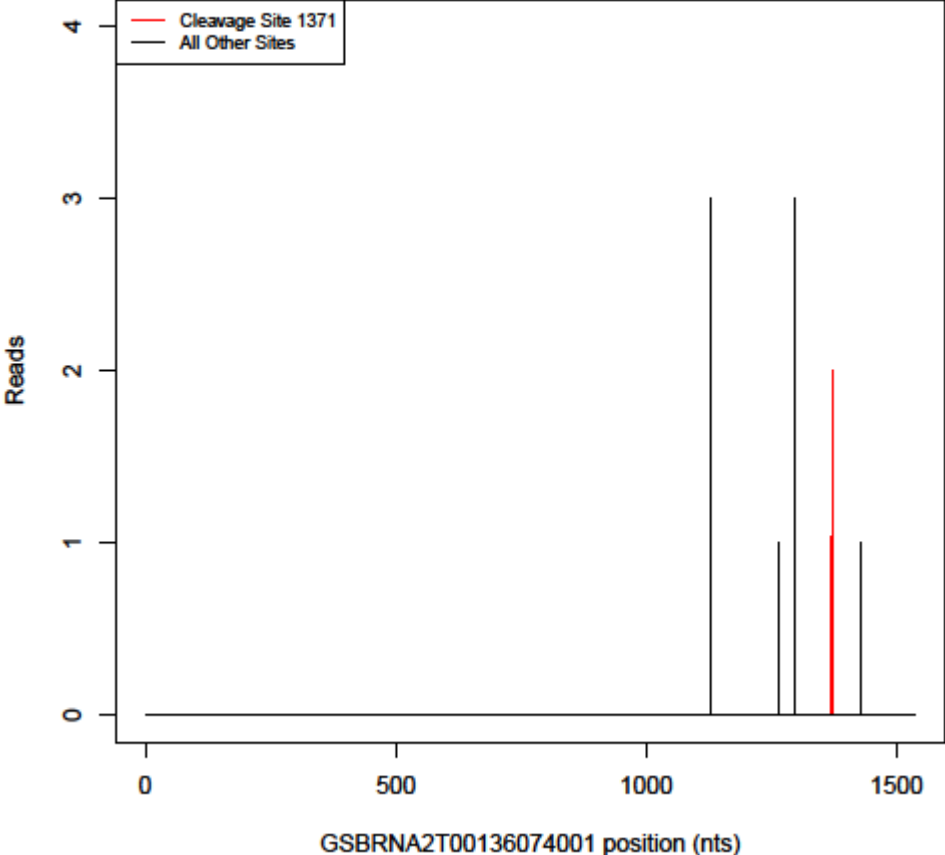



**unconservative\_chrA05\_480212 slicing GSRNA2T00136074001 at nt 137**

alignment score=6 , category=2 , p=0.0443121556867767



**unconservative\_chrA07\_677856 slicing GSRNA2T00136074001 at nt 137**

alignment score=6 , category=2 , p=0.0443121556867767

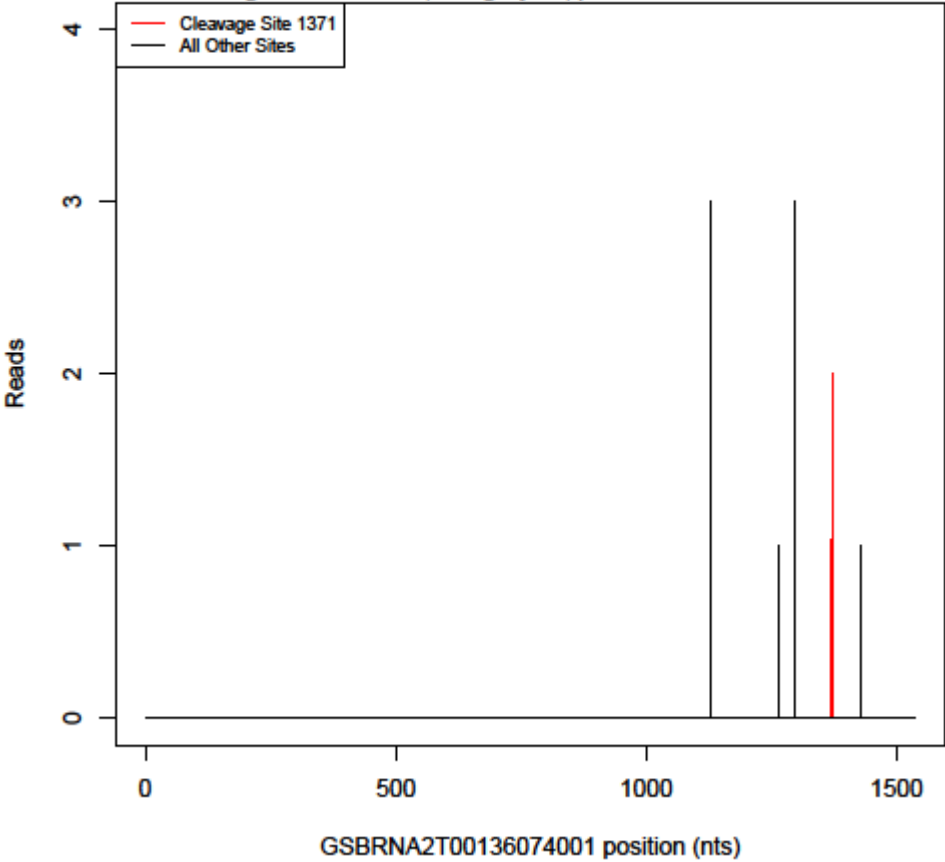

**unconservative\_chrC05\_1843559 slicing GSB RNA2T00139673001 at nt 50**

alignment score=7 , category=0 , p=0.00849891443849338

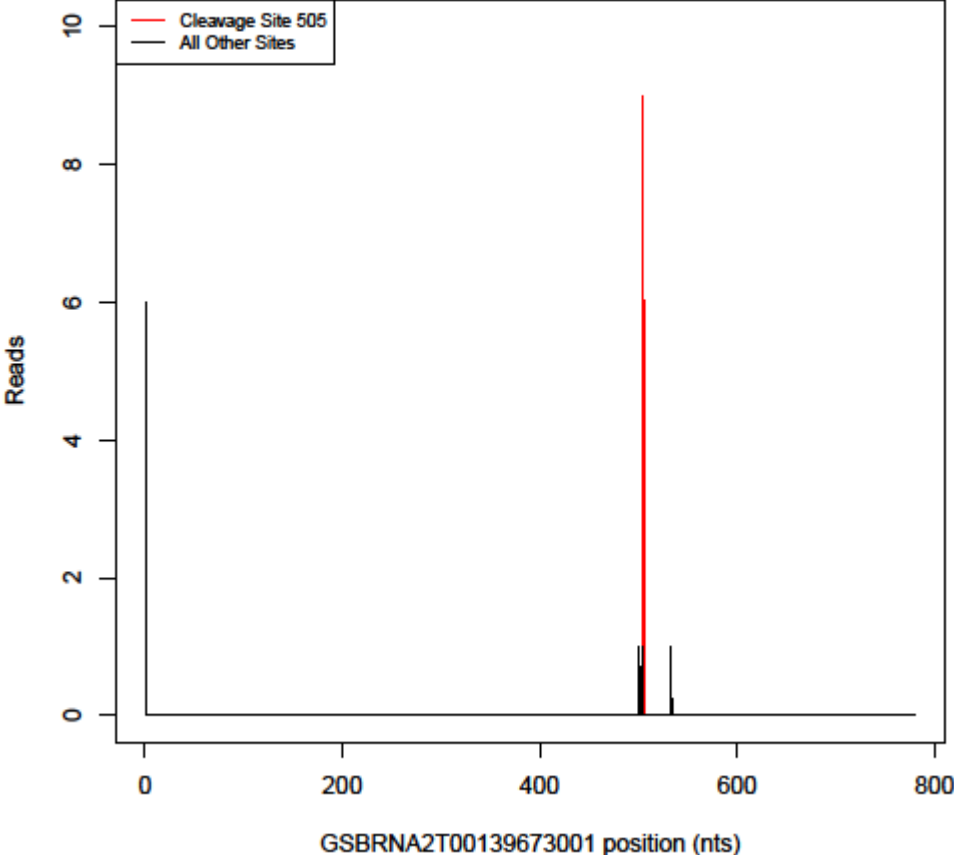

**unconservative\_chrC08\_2379444 slicing GSRNA2T00140338001 at nt 37**

alignment score=7 , category=0 , p=0.00799605255209745

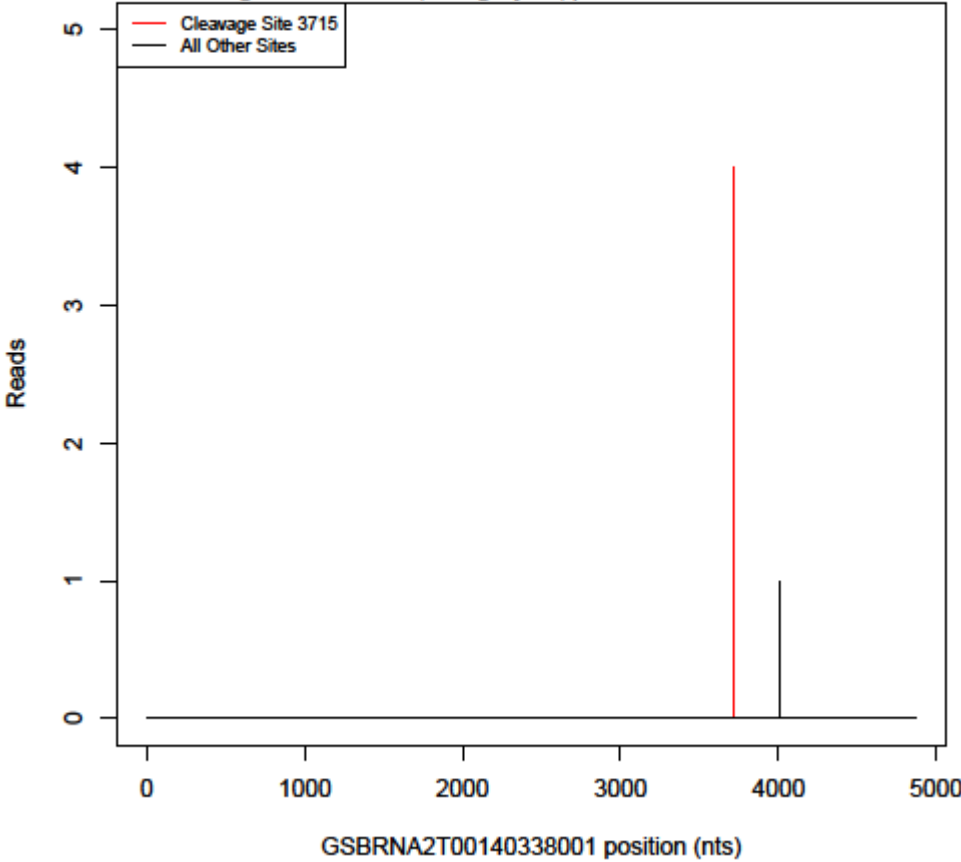

conservative\_chrCnn\_random\_3264385 slicing GSRNA2T00141442001 at

alignment score=5.5 , category=3 , p=0.0210494250285007

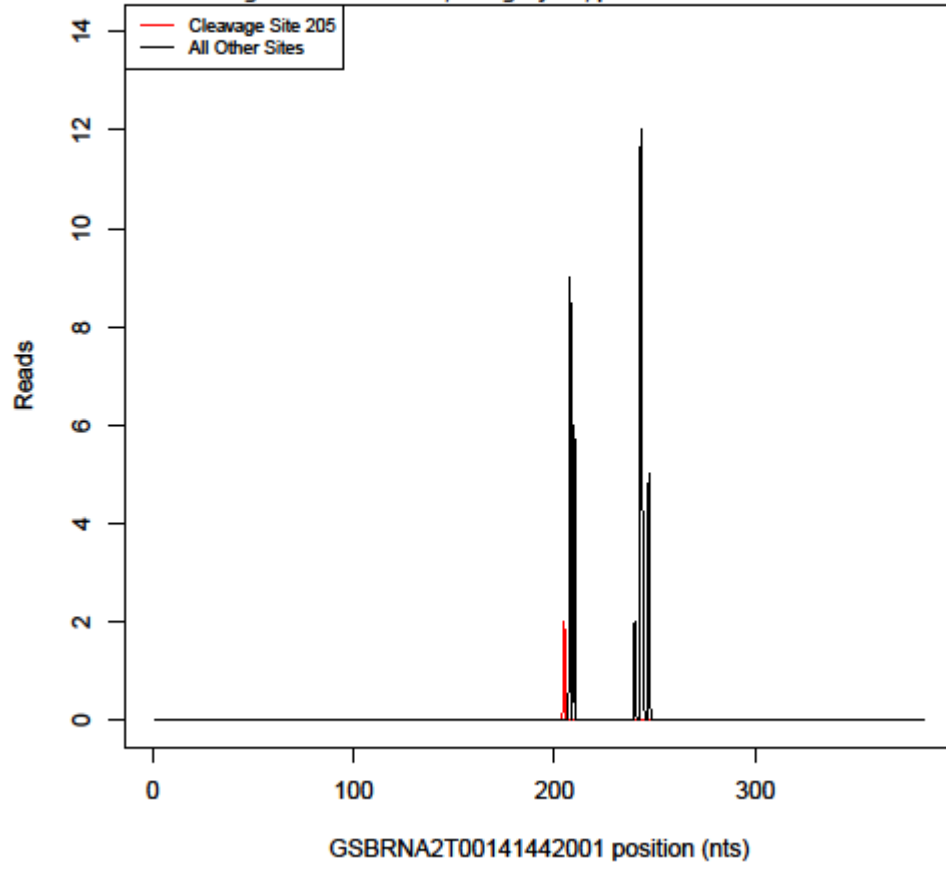

nonconservative\_chrCnn\_random\_3238853 slicing GSRNA2T00141255001 at

alignment score=7 , category=1 , p=0.0497456572986954

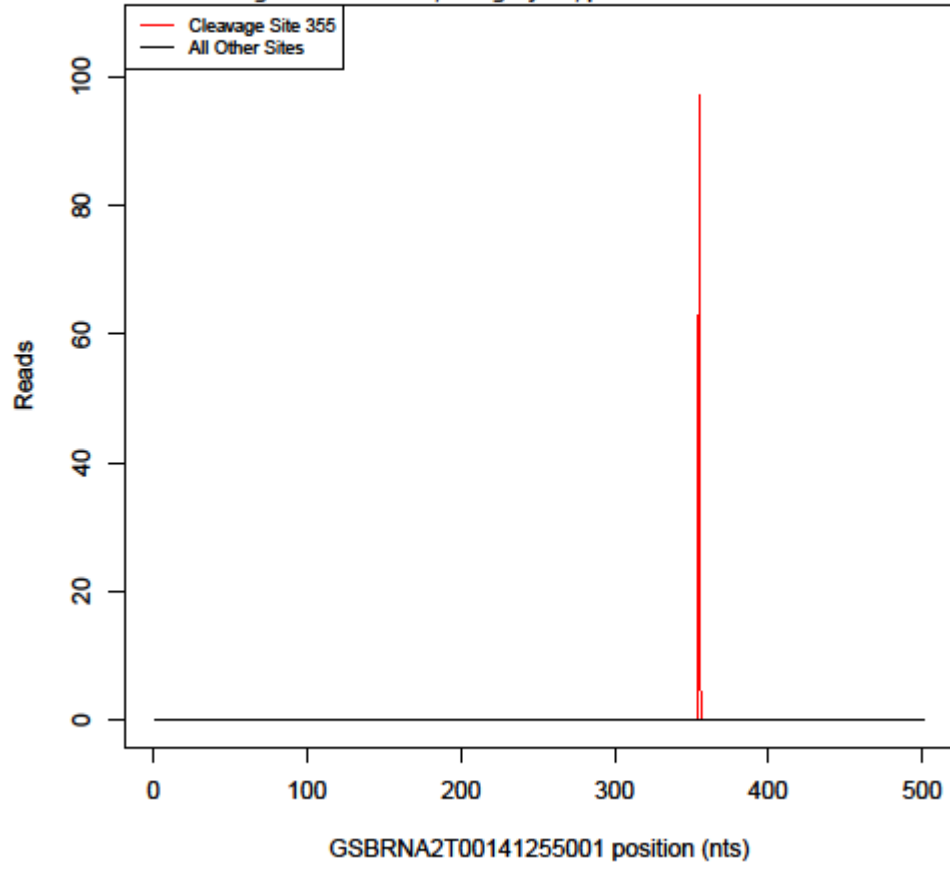

**unconservative\_chrC02\_1179738 slicing GSRNA2T00143041001 at nt 13**

alignment score=5.5 , category=1 , p=0.00850636210463707

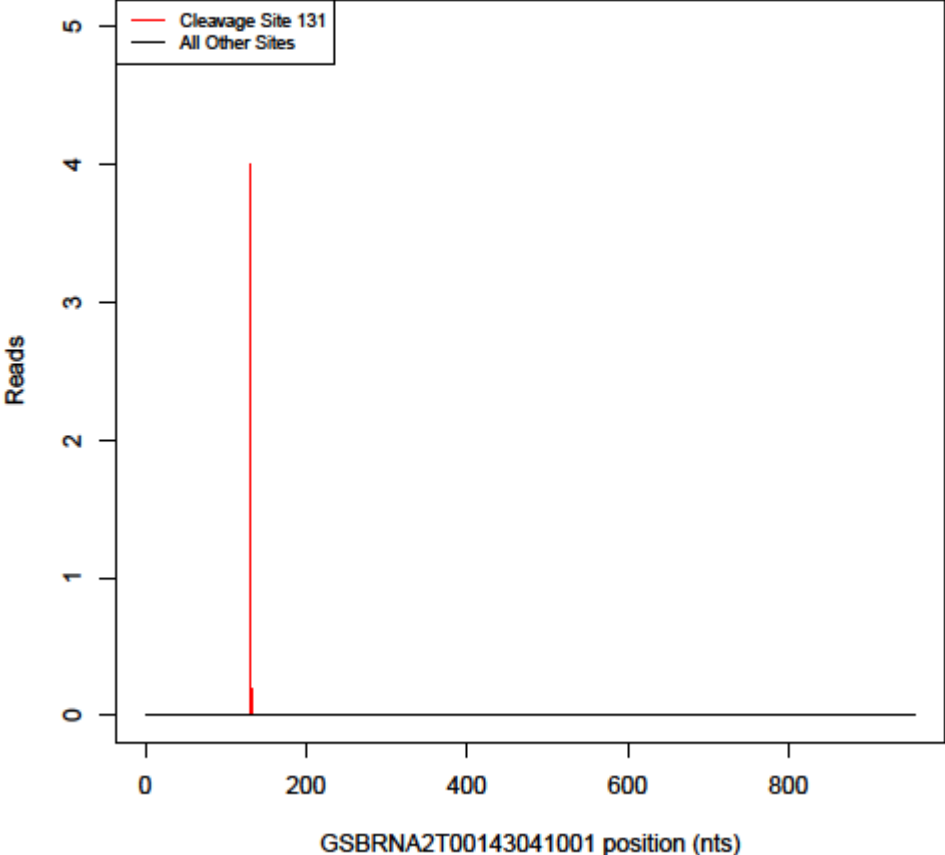

**unconservative\_chrC08\_2379444 slicing GSRNA2T00150899001 at nt 8:**

alignment score=6 , category=1 , p=0.016145636664134

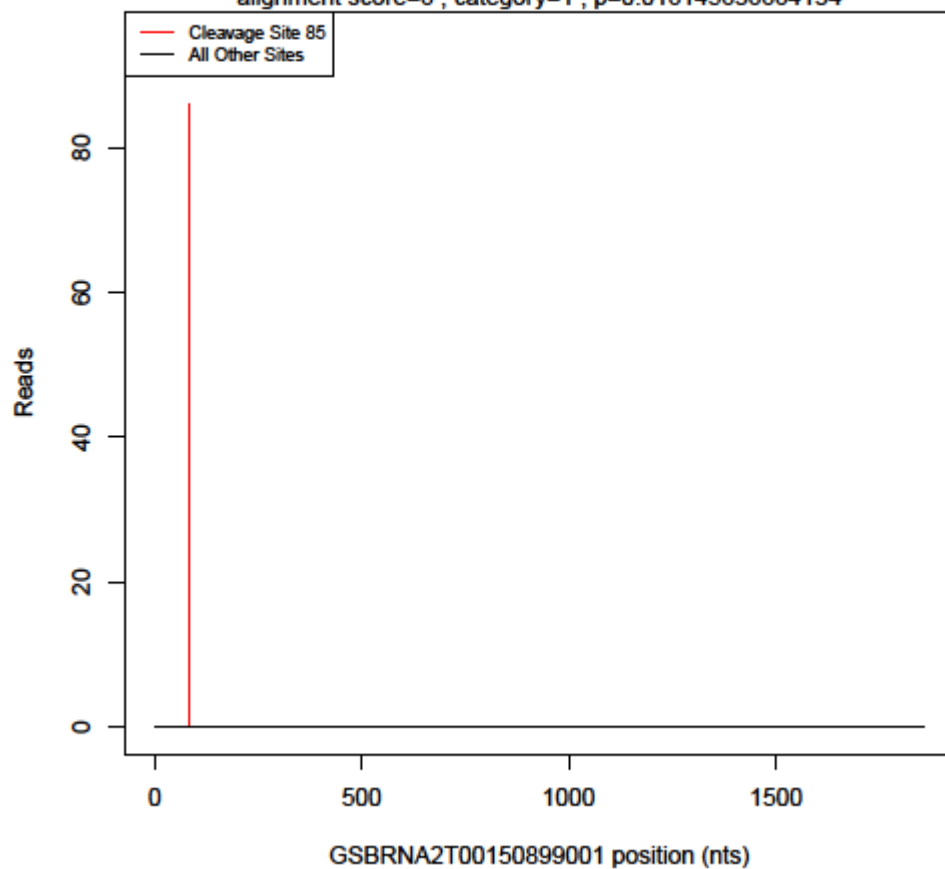



**unconservative\_chrC01\_1082945 slicing GSRNA2T00151874001 at nt 14'**

alignment score=6.5 , category=1 , p=0.0152365878124017

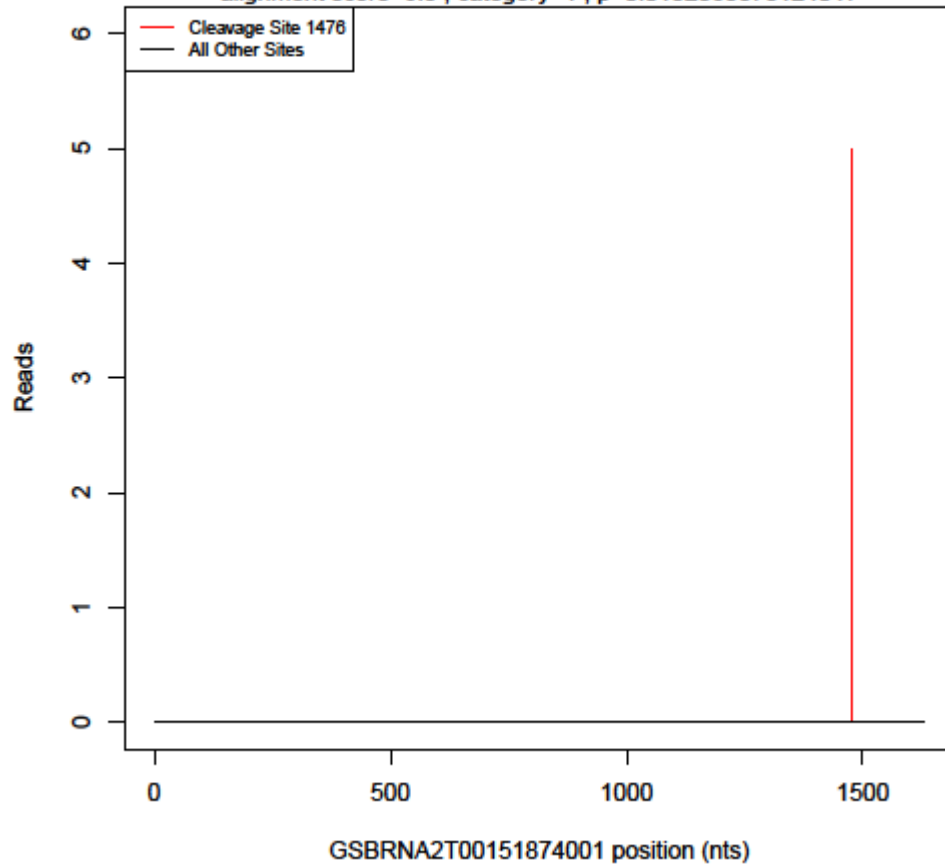

**unconservative\_chrA06\_523926 slicing GSRNA2T00151623001 at nt 69**

alignment score=7 , category=4 , p=0.0254817459081806

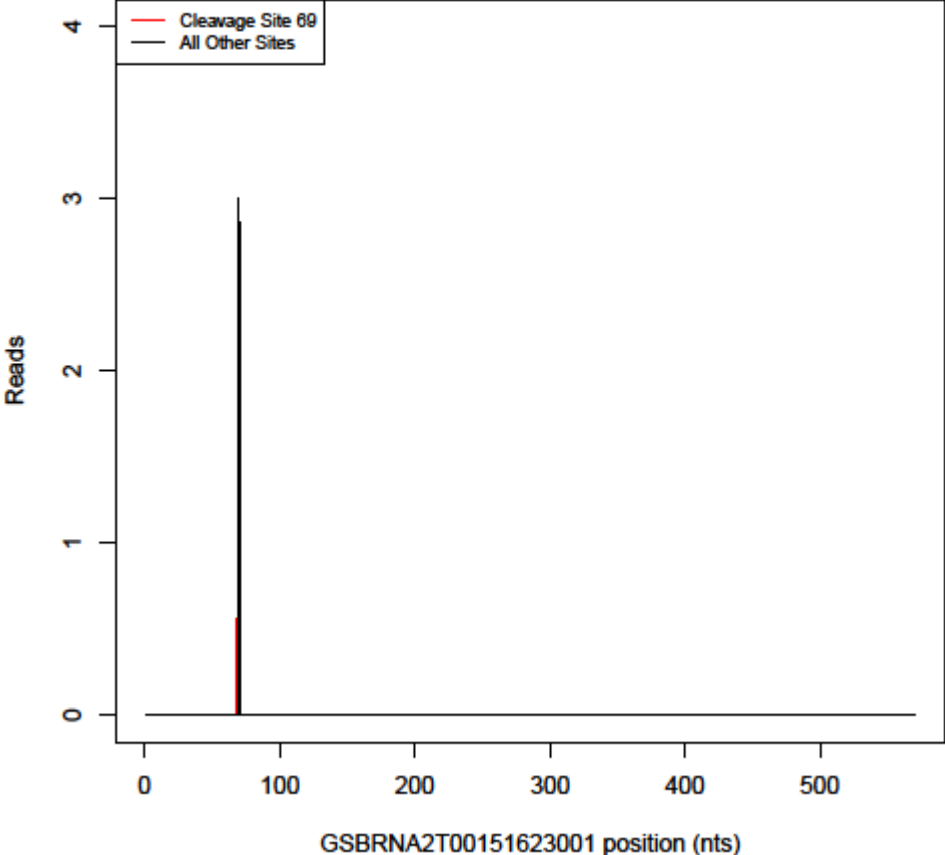

**unconservative\_chrC07\_2173958 slicing GSRNA2T00151874001 at nt 14'**

alignment score=6.5 , category=1 , p=0.0152365878124017

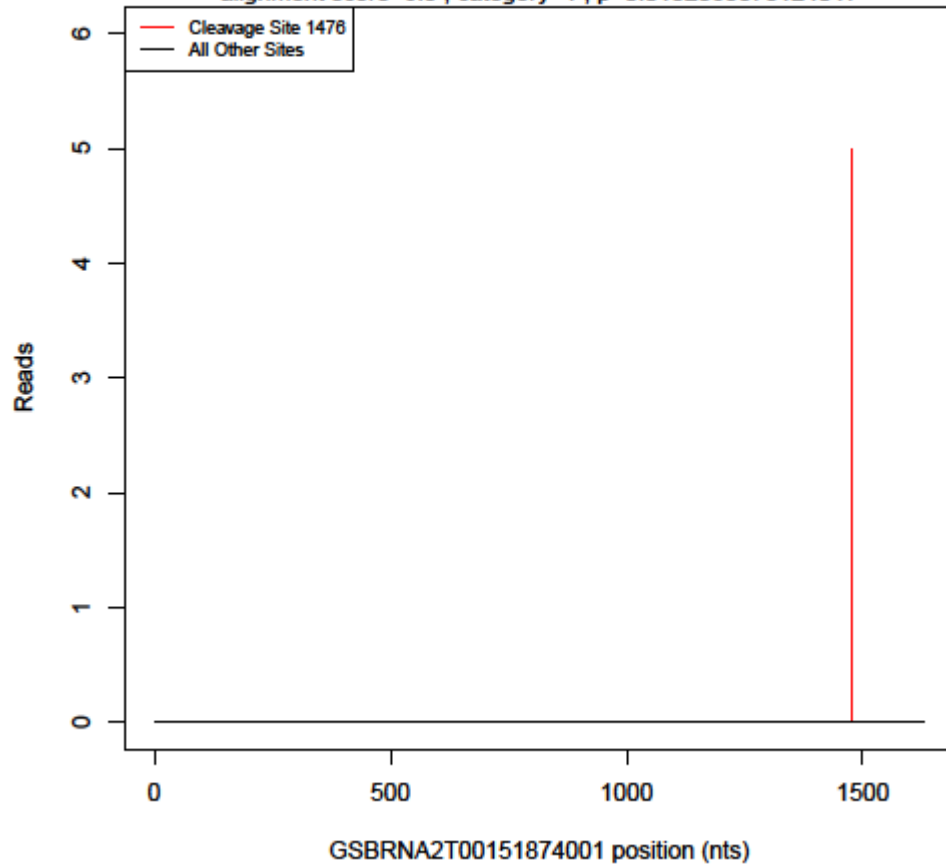

**unconservative\_chrA06\_532432 slicing GSRNA2T00156445001 at nt 193**

alignment score=6.5 , category=1 , p=0.0389340370875965

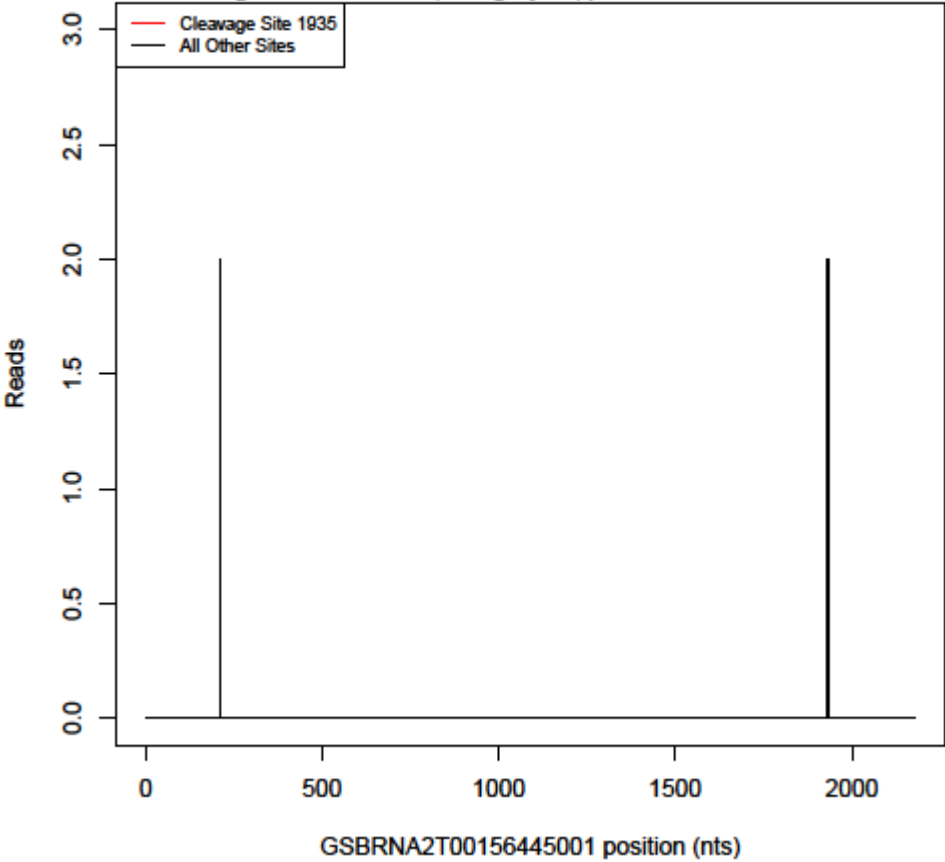

**unconservative\_chrA06\_528626 slicing GSRNA2T00158294001 at nt 20**

alignment score=7 , category=2 , p=0.00121292430700781

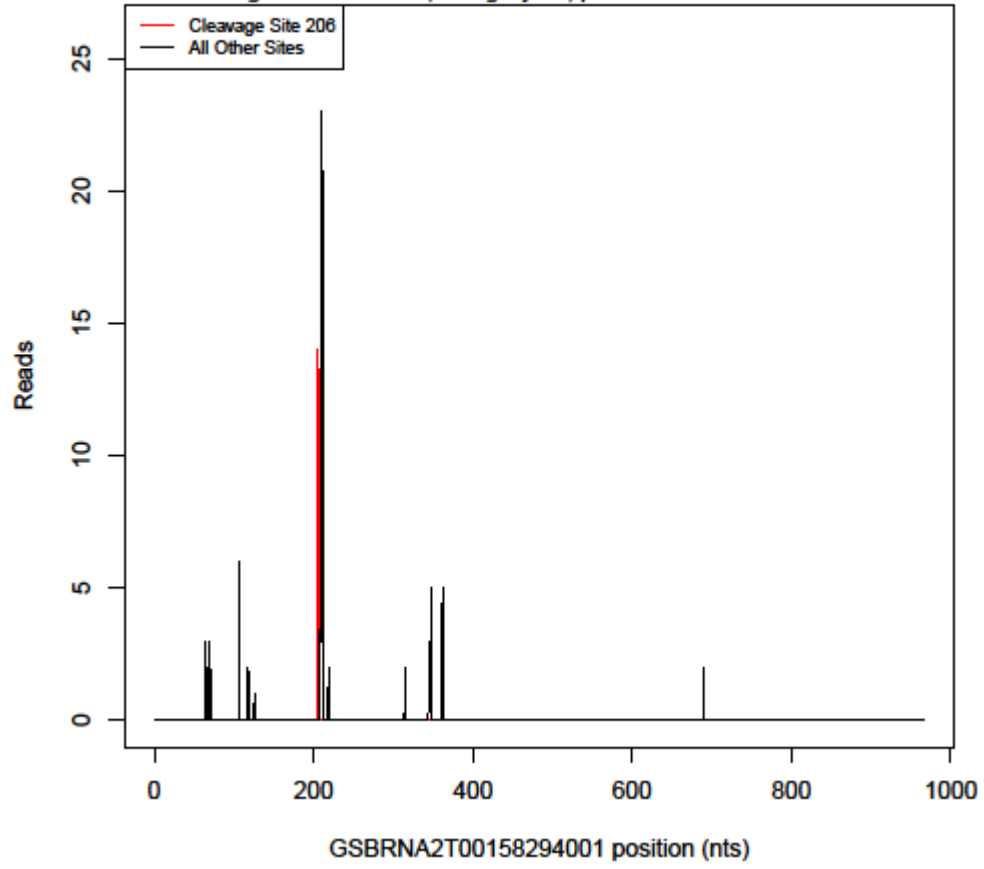

nonconservative\_chrCnn\_random\_3359647 slicing GSRNA2T00158294001 at

alignment score=7 , category=2 , p=0.00121292430700781



Supplement: pone.0204998.s004.pdf [file pone.0204998.s004.pdf]
