# Supplementary material for: Small RNA and degradome profiling involved in seed development and oil synthesis of Brassica napus
Source: PubMed Central journal article supplement (PMC6192625; doi:10.1371/journal.pone.0204998), 2018-10-17
Supplement: pone.0204998.s002.pdf [file pone.0204998.s002.pdf]

Provisional ID : chrA01\_9951  
 Score total : 1.3  
 Score for star read(s) : 3.9  
 Score for read counts : -2.8  
 Score for mfe : 0.3  
 Score for randfold : 0  
 Score for cons. seed :  
 Total read count : 6  
 Mature read count : 5  
 Loop read count : 0  
 Star read count : 1

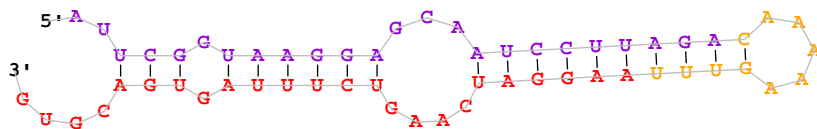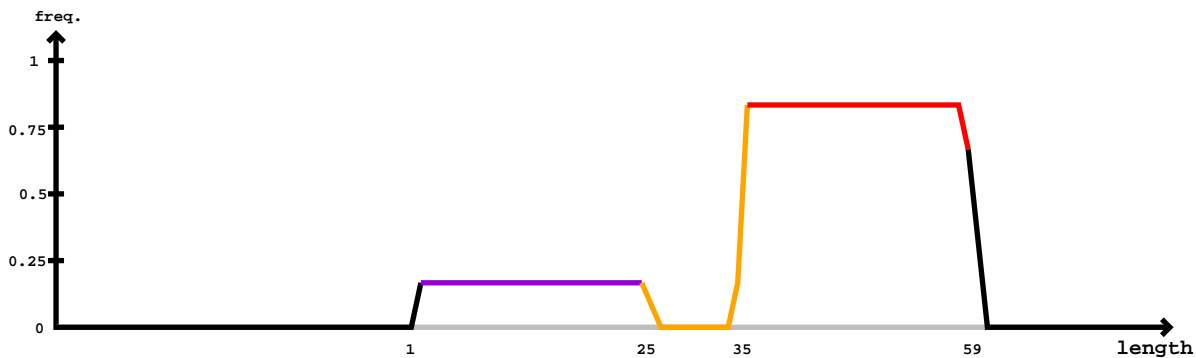

**Star** **Mature**

|      |                                                                                                                        |     |       |    |        |
|------|------------------------------------------------------------------------------------------------------------------------|-----|-------|----|--------|
| 5' - | aggcgaaucagauaaaaauuuuucaaaaauca <u>auucgguaggagcaauccuuaga</u> caaaaaguuuaaggaucaagucuuuagugacguggccacgucucauuggaugga | -3' | obs   |    |        |
|      | aggcgaaucagauaaaaauuuuucaaaaauca <u>auucgguaggagcaauccuuag</u> caaaaaguuuaaggaucaagucuuuagugacguggccacgucucauuggaugga  |     | exp   |    |        |
|      | .(((.....((((.....))))).(((.....)))).....(((.....)))).....(((.....)))).....(((.....)))).....                           |     | reads | mm | sample |
|      | .....auucgguaaAgagcaauccuuaga.....                                                                                     |     | 1     | 1  | S04    |
|      | .....uaaggaucaagucuuuagugacgu.....                                                                                     |     | 1     | 0  | S04    |
|      | .....aaggaucaagucuuuagugacgug.....                                                                                     |     | 3     | 0  | S04    |
|      | .....aaggaucaagucuuuagugacguU.....                                                                                     |     | 1     | 1  | S04    |

Provisional ID : chrA01\_14644  
 Score total : 1.1  
 Score for star read(s) : -1.3  
 Score for read counts : 0  
 Score for mfe : 2.4  
 Score for randfold : 0  
 Score for cons. seed :  
 Total read count : 12  
 Mature read count : 12  
 Loop read count : 0  
 Star read count : 0

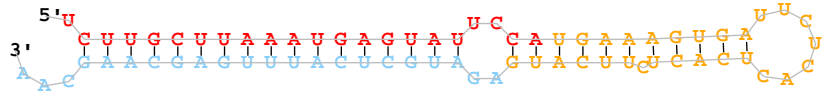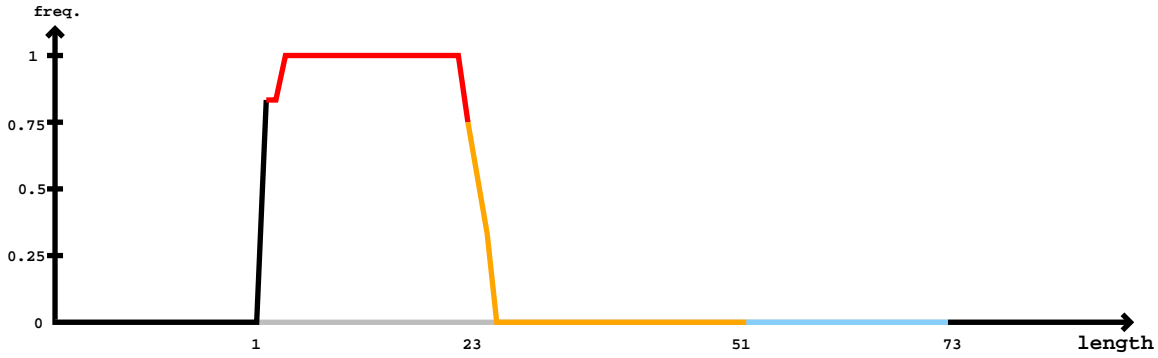

**Mature**

**Star**

| 5' -                                                                                                    |       | -3' | exp    |  |  |
|---------------------------------------------------------------------------------------------------------|-------|-----|--------|--|--|
|                                                                                                         | reads | mm  | sample |  |  |
| ccuuccgcuuuccaauguu <u>ucuugcuuaaaugaguauucca</u> ugaagugauucucacucucuauugagagcaagcaacguuuggaaguggaacua | 4     | 0   | S03    |  |  |
| ..... <u>ucuugcuuaaaugaguauucca</u> .....                                                               | 1     | 0   | S04    |  |  |
| ..... <u>ucuugcuuaaaugaguauuccA</u> .....                                                               | 1     | 1   | S04    |  |  |
| ..... <u>ucuugcuuaaaugaguauuccU</u> .....                                                               | 1     | 1   | S04    |  |  |
| ..... <u>ucuugcuuaaaugaguauucca</u> .....                                                               | 1     | 0   | S04    |  |  |
| ..... <u>ucuugcuuaaaugaguauuccaug</u> .....                                                             | 2     | 0   | S04    |  |  |
| ..... <u>uugcuuaaaugaguauuccaug</u> .....                                                               | 2     | 0   | S04    |  |  |

Provisional ID : chrA01\_32285  
 Score total : 0  
 Score for star read(s) : -1.3  
 Score for read counts : 0  
 Score for mfe : 1.3  
 Score for randfold : 0  
 Score for cons. seed :  
 Total read count : 41  
 Mature read count : 41  
 Loop read count : 0  
 Star read count : 0

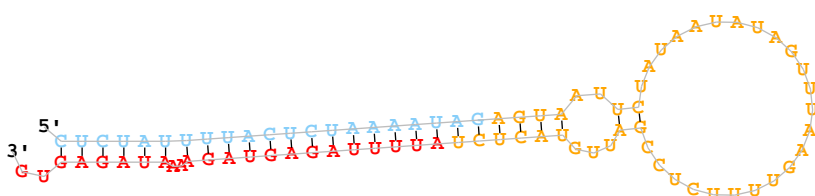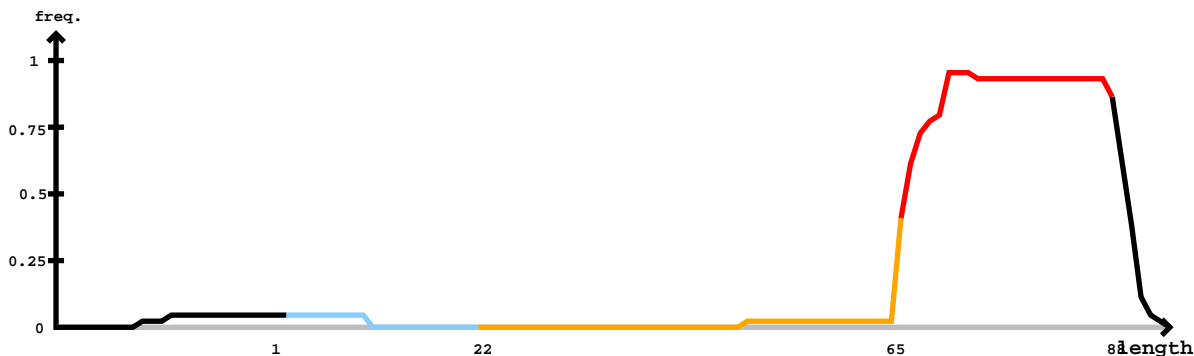

**Star**

**Mature**

| 5'                                                                                                                                    |                                                                                | -3' | exp   |    |
|---------------------------------------------------------------------------------------------------------------------------------------|--------------------------------------------------------------------------------|-----|-------|----|
| uaagaccaucuccaauggcuaucucuauuuuacucuaaaaauag                                                                                          | aguauuucuaauuuuuuuuuuuuuuuuuuuuuuucuccgauuguacucuauuuuuagaguagaaaauagagugaugaa |     | reads | mm |
| .....(((.....))).....((((((((((((((((((((((((((((((((((((((((((((((((((((((((((((.....))))))))))))))))))))))))))))))))))))))))))..... |                                                                                |     | 1     | 0  |
| .....aucuccaauggcuaucucuauuuu.....                                                                                                    |                                                                                |     | 1     | 0  |
| .....uccaauggcuaucucuauuuu.....                                                                                                       |                                                                                |     | 1     | 0  |
|                                                                                                                                       | .....uuuuuagaguagaaaauagagug.....                                              |     | 7     | 0  |
|                                                                                                                                       | .....uuuuuagaguagaaaauagaguga.....                                             |     | 1     | 0  |
|                                                                                                                                       | .....uuuuuagaguagaaaauagagug.....                                              |     | 1     | 0  |
|                                                                                                                                       | .....uuuuuagaguagaaaauagagugau.....                                            |     | 1     | 0  |
|                                                                                                                                       | .....uuuuuagaguagaaaauagagugau.....                                            |     | 1     | 0  |
|                                                                                                                                       | .....ucuccgauuguacucuauuuuuga.....                                             |     | 1     | 0  |
|                                                                                                                                       | .....uuuuuagaguagaaaauagagu.....                                               |     | 1     | 0  |
|                                                                                                                                       | .....uuuuuagaguagaaaauagagG.....                                               |     | 1     | 1  |
|                                                                                                                                       | .....uuuuuagaguagaaaauagagug.....                                              |     | 6     | 0  |
|                                                                                                                                       | .....uuuuuagaguagaaaauagagugU.....                                             |     | 1     | 1  |
|                                                                                                                                       | .....uuuuuagaguagaaaauagagu.....                                               |     | 1     | 0  |
|                                                                                                                                       | .....uuuuuagaguagaaaauagagug.....                                              |     | 1     | 0  |
|                                                                                                                                       | .....uuuuuagaguagaaaauagagugau.....                                            |     | 3     | 0  |
|                                                                                                                                       | .....uuuuuagaguagaaaauagagugau.....                                            |     | 1     | 1  |
|                                                                                                                                       | .....uuuuuagaguagaaaauagagugaC.....                                            |     | 1     | 1  |
|                                                                                                                                       | .....uuuuuagaguagaaaauagagug.....                                              |     | 1     | 0  |
|                                                                                                                                       | .....uuuuuagaguagaaaauGgagug.....                                              |     | 1     | 1  |
|                                                                                                                                       | .....uuuuuagaguagaaaauagagugau.....                                            |     | 1     | 0  |
|                                                                                                                                       | .....uuuuuagaguagaaaauagagugaug.....                                           |     | 1     | 0  |
|                                                                                                                                       | .....uuuuuagaguagaaaauagagugau.....                                            |     | 1     | 0  |
|                                                                                                                                       | .....uuuuuagaguagaaaauagagugauga.....                                          |     | 1     | 0  |
|                                                                                                                                       | .....uuuuuagaguagaaaauagagugaugaa.....                                         |     | 1     | 0  |
|                                                                                                                                       | .....uuuuuagaguagaaaauagagug.....                                              |     | 2     | 0  |
|                                                                                                                                       | .....uuuuuagaguagaaaauagagugau.....                                            |     | 3     | 0  |
|                                                                                                                                       | .....uuuuuagaguagaaaauagagugaUA.....                                           |     | 1     | 1  |
|                                                                                                                                       | .....uuuuuagaguagaaaauagagugaug.....                                           |     | 1     | 0  |

Provisional ID : chrA01\_34930  
 Score total : 0.2  
 Score for star read(s) : -1.3  
 Score for read counts : 0  
 Score for mfe : 1.5  
 Score for randfold : 0  
 Score for cons. seed :  
 Total read count : 13  
 Mature read count : 13  
 Loop read count : 0  
 Star read count : 0

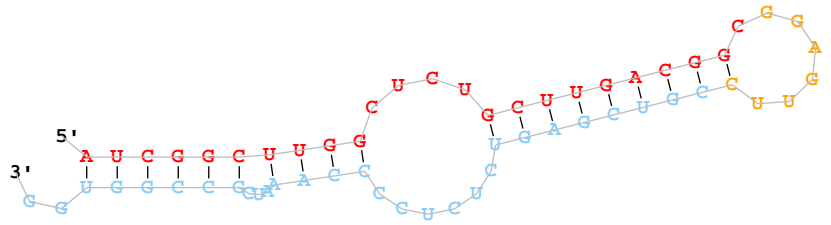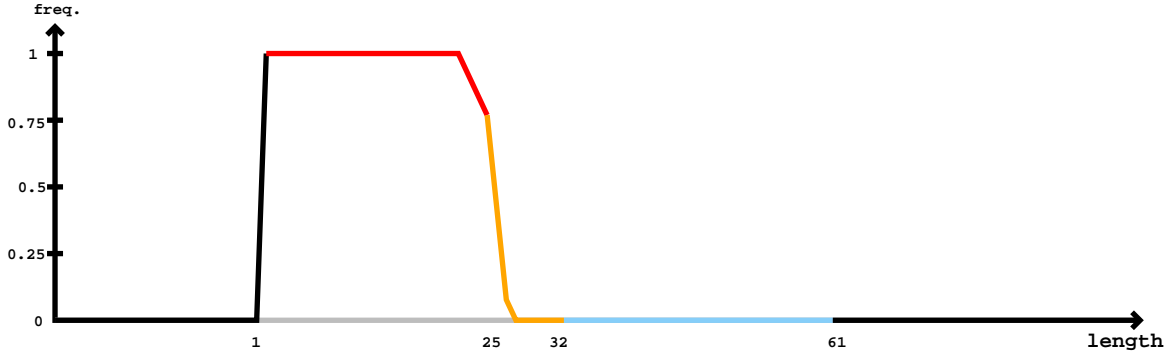

**Mature** **Star**

| 5' -                                                                                                                         | 3' - | exp | reads | mm | sample |
|------------------------------------------------------------------------------------------------------------------------------|------|-----|-------|----|--------|
| uccuucgugaacuguuuc <u>aucggcuuggcucugcuugacggcgagauuc</u> cgucgagucucuccccaa <u>aucg</u> cggguggaagguggucugcucuccuugacgguguc |      |     |       |    |        |
| .....((.(.((.(.(((((.....))))))))).((.....))))).((.....))                                                                    |      |     |       |    |        |
| .....aucggcuuggcucugcuugac.....                                                                                              |      |     | 1     | 0  | S03    |
| .....aucggcuuggcucugcuugacg.....                                                                                             |      |     | 1     | 0  | S03    |
| .....aucggcuuggcucugcuugacgg.....                                                                                            |      |     | 1     | 0  | S03    |
| .....Gucggcuuggcucugcuugacggc.....                                                                                           |      |     | 1     | 1  | S03    |
| .....aucggcuuggcucugcuugacggc.....                                                                                           |      |     | 2     | 0  | S03    |
| .....aucggcuuggcucugcuugacggcU.....                                                                                          |      |     | 1     | 1  | S03    |
|                                                                                                                              |      |     |       |    |        |
| .....aucggcuuggcucugcuugacggc.....                                                                                           |      |     | 3     | 0  | S04    |
| .....aucggcuuggcucugcuugGcggc.....                                                                                           |      |     | 1     | 1  | S04    |
| .....aucggcuuggcucugcuugacggU.....                                                                                           |      |     | 1     | 1  | S04    |
| .....aucggcAuggcucugcuugacggc.....                                                                                           |      |     | 1     | 1  | S04    |





Provisional ID : chrA01\_60332  
 Score total : 1.5  
 Score for star read(s) : 3.9  
 Score for read counts : -4.9  
 Score for mfe : 2.6  
 Score for randfold : 0  
 Score for cons. seed :  
 Total read count : 2  
 Mature read count : 1  
 Loop read count : 0  
 Star read count : 1

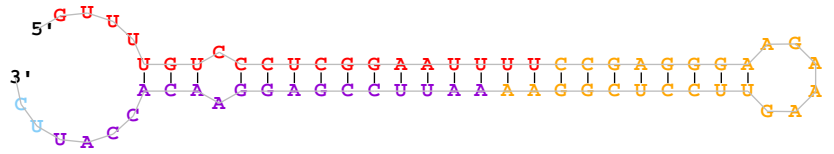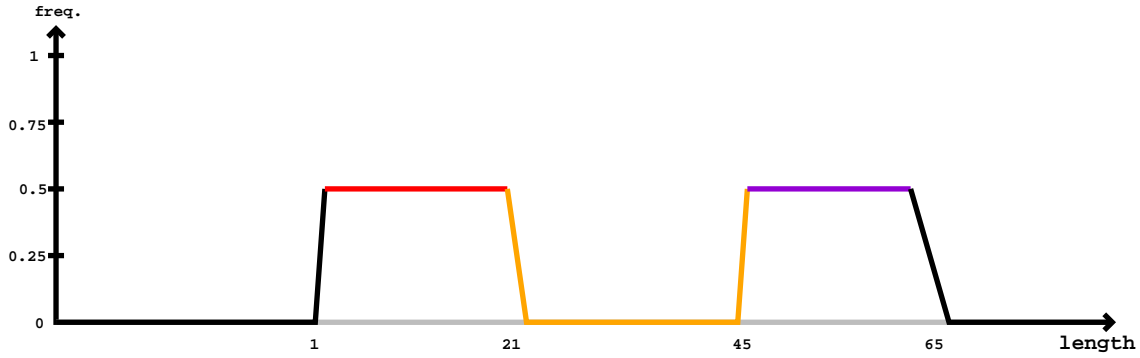

**Mature**

**Star**

| 5' - | Sequence                                                                                                                            | -3' | obs | exp | reads | mm | sample |
|------|-------------------------------------------------------------------------------------------------------------------------------------|-----|-----|-----|-------|----|--------|
|      | aaaauuccgaggaaaauuccgagga <u>guuuuguccucggaauuuu</u> ccgaggaagaaga <u>guuccucgga</u> aaaauuccgaggaacac <u>cau</u> uccucggaauucgaaaa |     | 1   | 1   | 1     | 1  | S03    |
|      | aaaauuccgaggaaaauuccgagga <u>guuuuguccucggaauuuu</u> ccgaggaagaaga <u>guuccucgga</u> aaaauuccgaggaacac <u>cau</u> uccucggaauucgaaaa |     | 1   | 0   | 1     | 0  | S04    |

Provisional ID : chrA01\_61766  
 Score total : 0.4  
 Score for star read(s) : 3.9  
 Score for read counts : -4.9  
 Score for mfe : 1.5  
 Score for randfold : 0  
 Score for cons. seed :  
 Total read count : 2  
 Mature read count : 1  
 Loop read count : 0  
 Star read count : 1

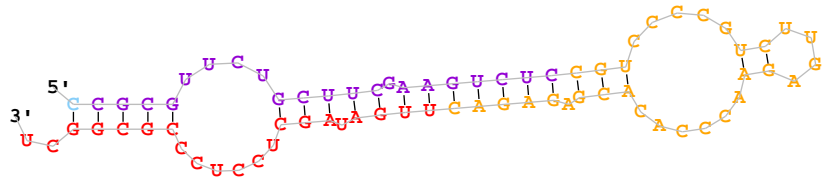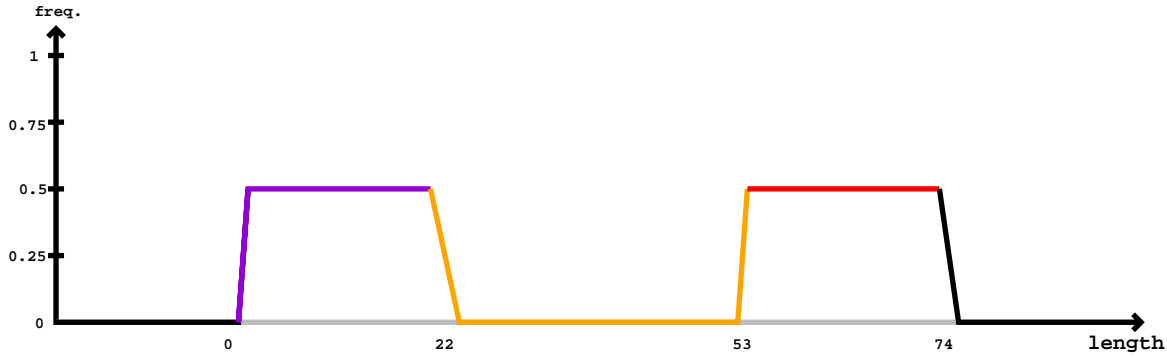

**Star**

**Mature**

| 5' -                                      |      | -3'                        | obs | exp | reads | mm | sample |
|-------------------------------------------|------|----------------------------|-----|-----|-------|----|--------|
| gcugagcaacgcgcaagcgcgcgguucugcuucgaagucuc | cguc | gagagacuugauagcucccccgcggu | 1   | 0   | 1     | 0  | S03    |
| gcugagcaacgcgcaagcgcgcgguucugcuucgaagucuc | cguc | gagagacuugauagcucccccgcggu | 1   | 0   | 1     | 0  | S04    |







# Mature

# Star

|                                                                                                              |    |   |     |
|--------------------------------------------------------------------------------------------------------------|----|---|-----|
| uccucggaauuuccucggaauuuccgaggggaauuccgaagaaaauuggaauuuccgaggaaccccuaccuucccgggaauucugucggaacauuccgaggaaggaac |    |   |     |
| ...ucggaauuuccucggaauuu.....                                                                                 | 32 | 0 | S04 |
| ...ucggaauCuccucggaauuu.....                                                                                 | 1  | 1 | S04 |
| ...ucggaauuuccucggaauuuc.....                                                                                | 3  | 0 | S04 |
| ...cggaauuuccucggaaua.....                                                                                   | 2  | 0 | S04 |
| ...cggaauuuccucggaauu.....                                                                                   | 2  | 0 | S04 |
| ...cggaauuuccucggaauuu.....                                                                                  | 6  | 0 | S04 |
| ...cggaauuuccucggaauuuc.....                                                                                 | 1  | 0 | S04 |
| .....auuucccgggaauuuccgagU.....                                                                              | 1  | 1 | S04 |
| .....gaaauuccgaggggaauuccga.....                                                                             | 2  | 0 | S04 |
| .....aauaAuccgaggggaauuccga.....                                                                             | 1  | 1 | S04 |
| .....auauuccgaggggaauuccga.....                                                                              | 2  | 0 | S04 |
| .....uauuccgaggggaauuccga.....                                                                               | 2  | 0 | S04 |
| .....cuucccgggaauucugucgga.....                                                                              | 1  | 0 | S04 |
| .....ucccgggaauucugucgga.....                                                                                | 1  | 0 | S04 |
| .....cucggaauucugucggaac.....                                                                                | 1  | 0 | S04 |

Provisional ID : chrA01\_64877  
Score total : 1.6  
Score for star read(s) : 3.9  
Score for read counts : -2.8  
Score for mfe : 0.7  
Score for randfold : 0  
Score for cons. seed :  
Total read count : 6  
Mature read count : 5  
Loop read count : 0  
Star read count : 1

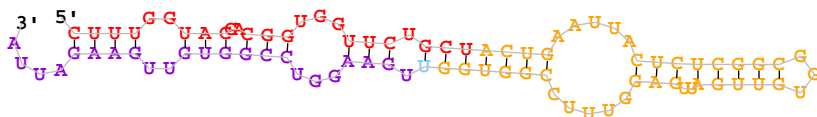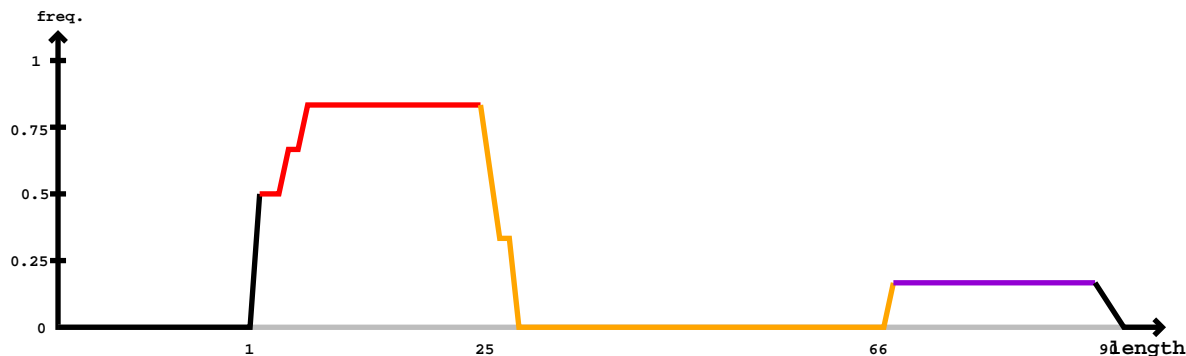

**Mature**

**Star**

| 5' -                                                                                        |                                                                                                     | -3' | obs | exp | reads | mm | sample |
|---------------------------------------------------------------------------------------------|-----------------------------------------------------------------------------------------------------|-----|-----|-----|-------|----|--------|
| agagaccguuuugcuuagu                                                                         | <b>cuuugguacgacgggguucugcuacugaauuacucucggcggguugauugagguuuccgggguugaagguccggguguugaagauuaauuaa</b> |     |     |     |       |    |        |
| agagaccguuuugcuuagu                                                                         | <b>cuuugguacgacgggguucugcuacugaauuacucucggcggguugauugagguuuccgggguugaagguccggguguugaagauuaauuaa</b> |     |     |     |       |    |        |
| .....(((((((.....(((.....(((.....(((.....(((.....(((.....(((.....(((.....)))))))))))))).... | .....                                                                                               |     |     |     | 1     | 1  | S03    |
| .....ugguacgacgggguucugcuacG.....                                                           | .....                                                                                               |     |     |     | 1     | 1  | S03    |
| .....                                                                                       | .....ugaagguccggguguugaagauu.....                                                                   |     |     |     |       |    |        |
| .....                                                                                       | .....cuuugguacgacgggguucugcC.....                                                                   |     |     |     | 2     | 1  | S04    |
| .....                                                                                       | .....cuuugguacgacgggguucugcu.....                                                                   |     |     |     | 1     | 0  | S04    |
| .....                                                                                       | .....guacgacgggguucugcuacu.....                                                                     |     |     |     | 1     | 0  | S04    |

Provisional ID : chrA01\_84314  
 Score total : 1  
 Score for star read(s) : -1.3  
 Score for read counts : 0  
 Score for mfe : 2.3  
 Score for randfold : 0  
 Score for cons. seed :  
 Total read count : 19  
 Mature read count : 19  
 Loop read count : 0  
 Star read count : 0

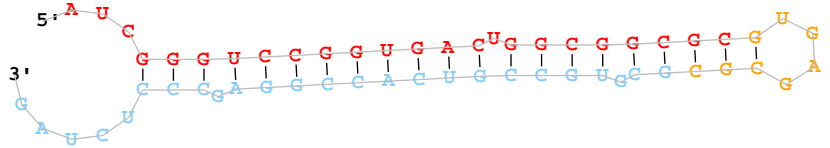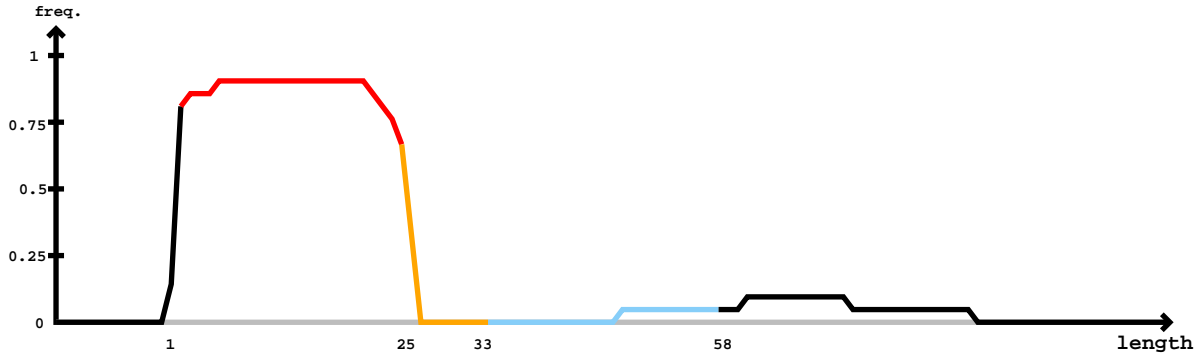

Mature Star

| 5' - <span style="color: red;">ggggaucuguaaucggguccggugacuggcggcgcgugagcgcgcgugccguaccaggagccucua</span> <span style="color: blue;">gccaccagcaaagcugugauuucugcuccggucuuugucuccuuucc</span> -3' | exp | reads | mm | sample |
|------------------------------------------------------------------------------------------------------------------------------------------------------------------------------------------------|-----|-------|----|--------|
| ((((((.....(((((((((((((((((((((((.....)))))))))))))))))))).))).....((((.....)))).....((.....)))))).....                                                                                       |     |       |    |        |
| .....aaucggguccggugacuggcgcgA.....                                                                                                                                                             |     | 1     | 1  | S03    |
| .....aucggguccggugacuggcggcgc.....                                                                                                                                                             |     | 1     | 0  | S03    |
| .....aucggguccggugacuggcggcgU.....                                                                                                                                                             |     | 1     | 1  | S03    |
| .....gagccucuaagccaccagUaaagc.....                                                                                                                                                             |     | 1     | 1  | S03    |
|                                                                                                                                                                                                |     |       |    |        |
| .....aaucggguccggugacuggcgcgA.....                                                                                                                                                             |     | 1     | 1  | S04    |
| .....aaucggguccggugacuggcggcg.....                                                                                                                                                             |     | 1     | 0  | S04    |
| .....aucggguccggugacuggcggcgU.....                                                                                                                                                             |     | 3     | 1  | S04    |
| .....aucggguccggugacuggAggcgc.....                                                                                                                                                             |     | 1     | 1  | S04    |
| .....aucggguccggugacGggcggcgc.....                                                                                                                                                             |     | 1     | 1  | S04    |
| .....aucUggguccggugacuggcggcgc.....                                                                                                                                                            |     | 1     | 1  | S04    |
| .....aucggguccggugacuggcggcgc.....                                                                                                                                                             |     | 6     | 0  | S04    |
| .....ucAgguccggugacuggcgc.....                                                                                                                                                                 |     | 1     | 1  | S04    |
| .....gguUcggugacuggcggc.....                                                                                                                                                                   |     | 1     | 1  | S04    |
| .....accagcaaagcugugauuucugc.....                                                                                                                                                              |     | 1     | 0  | S04    |



Provisional ID : chrA01\_90044  
 Score total : 0  
 Score for star read(s) : 3.9  
 Score for read counts : -4.4  
 Score for mfe : 0.5  
 Score for randfold : 0  
 Score for cons. seed :  
 Total read count : 3  
 Mature read count : 2  
 Loop read count : 0  
 Star read count : 1

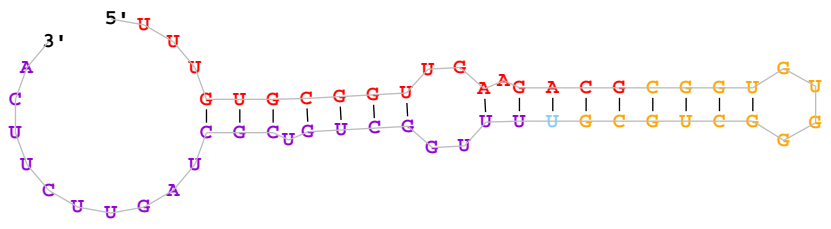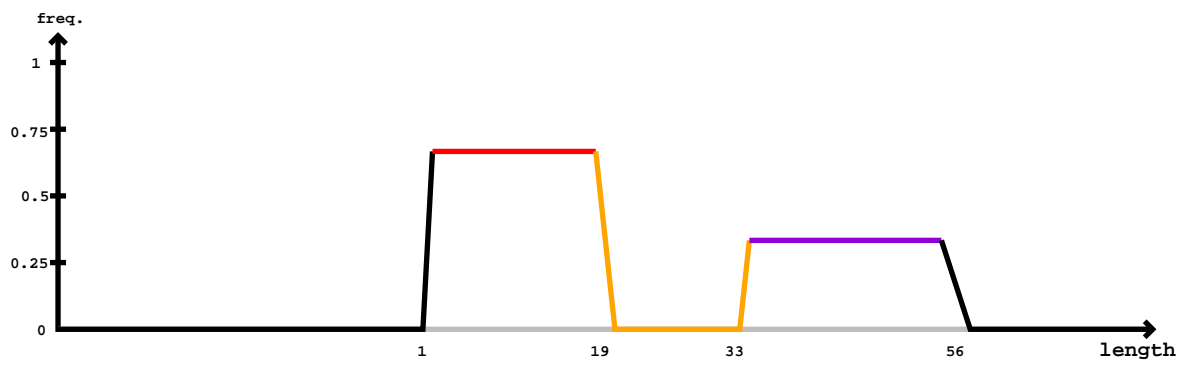

|    |                                                                                                                                                                                                                     | <b>Mature</b> | <b>Star</b> |       |     |        |
|----|---------------------------------------------------------------------------------------------------------------------------------------------------------------------------------------------------------------------|---------------|-------------|-------|-----|--------|
| 5' | ugu cgguguguggu ugguuugucguaauaugaggau <span style="color: red;">uuugugcggugaagaagacg</span> cggugugggugcugcg <span style="color: purple;">uuugggugucgcua</span> guucuucauuuguuuuuuuuuuuuuuuagau                    |               |             | -3'   | obs |        |
|    | ugu cgguguguggu ugguuugucguaauaugaggau <span style="color: red;">uuugugcggugaagaagacg</span> cggugugggugcugcg <span style="color: purple;">uuugggugucgcua</span> guucuucauuuguuuuuuuuuuuuuuuuuuuuuagau              |               |             |       | exp |        |
|    | .....(((((.(.....(((.....(((.....(((.....(((.....(((.....(((.....(((.....(((.....(((.....(((.....(((.....(((.....))).....))).....))).....))).....))).....))).....))).....))).....))).....))).....))).....))).....)) |               |             | reads | mm  | sample |
|    | .....uuugAgcggugaagaagacg.....                                                                                                                                                                                      |               |             | 1     | 1   | S03    |
|    | .....uuugggugucgcua guucuuca.....                                                                                                                                                                                   |               |             | 1     | 0   | S03    |
|    | .....uuugAgcggugaagaagacg.....                                                                                                                                                                                      |               |             | 1     | 1   | S04    |

Provisional ID : chrA01\_random\_2678411  
 Score total : 0.2  
 Score for star read(s) : -1.3  
 Score for read counts : 0  
 Score for mfe : 1.5  
 Score for randfold : 0  
 Score for cons. seed :  
 Total read count : 54  
 Mature read count : 54  
 Loop read count : 0  
 Star read count : 0

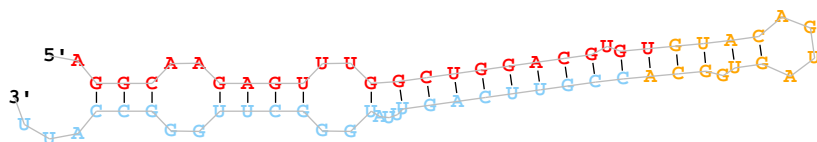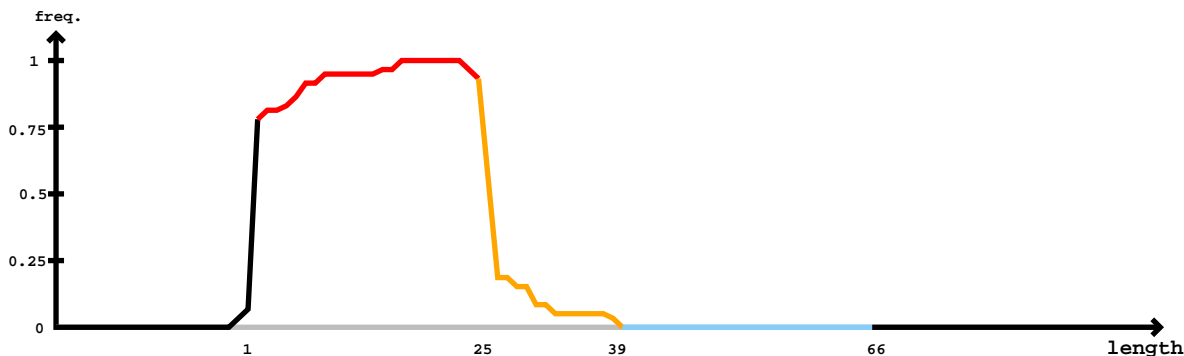

**Mature** **Star**

| 5' -                                                                                                         | reads | exp | sample |
|--------------------------------------------------------------------------------------------------------------|-------|-----|--------|
| agggccucaaacacguggauaggcaagaguuuggcuggacguguguacaguaguggcacgguucaguuuauuggccauuggguuuguuucgguuugccuuugaugggc | 1     | 1   | S03    |
| .....Guaggcaagaguuuggcuggacgug.....                                                                          | 16    | 0   | S03    |
| .....aggcaagaguuuggcuggacgugu.....                                                                           | 2     | 0   | S03    |
| .....aguuuggcuggacguguguacagu.....                                                                           | 2     | 0   | S03    |
| .....uggacguguguacaguaguggca.....                                                                            | 1     | 1   | S04    |
| .....uaggcaagaguuuggcuggacgug.....                                                                           | 2     | 0   | S04    |
| .....aggcaagaguuuggcuggacgugC.....                                                                           | 1     | 1   | S04    |
| .....aggcaagaguuuggcuggacgugu.....                                                                           | 22    | 0   | S04    |
| .....aggcaagaguuuggcuggacgugG.....                                                                           | 1     | 1   | S04    |
| .....aggcaagaguuuggcuggacgugA.....                                                                           | 2     | 1   | S04    |
| .....ggcaagaguuuggcuggacgugu.....                                                                            | 1     | 0   | S04    |
| .....ggcaagaguuuggcuggacgugug.....                                                                           | 1     | 0   | S04    |
| .....caagaguuuggcuggacgugugUG.....                                                                           | 1     | 1   | S04    |
| .....aagaguuuggcuggacgugugCa.....                                                                            | 1     | 1   | S04    |
| .....aagaguuuggcuggacguguguaa.....                                                                           | 1     | 0   | S04    |
| .....agaguuuggcuggacguguguaU.....                                                                            | 1     | 1   | S04    |
| .....agaguuuggcuggacguguguaa.....                                                                            | 2     | 0   | S04    |
| .....gcuggacguguguaUaguaguggc.....                                                                           | 1     | 1   | S04    |



Provisional ID : chrA02\_97002  
 Score total : 0.4  
 Score for star read(s) : 3.9  
 Score for read counts : -4.4  
 Score for mfe : 0.9  
 Score for randfold : 0  
 Score for cons. seed :  
 Total read count : 3  
 Mature read count : 1  
 Loop read count : 0  
 Star read count : 2

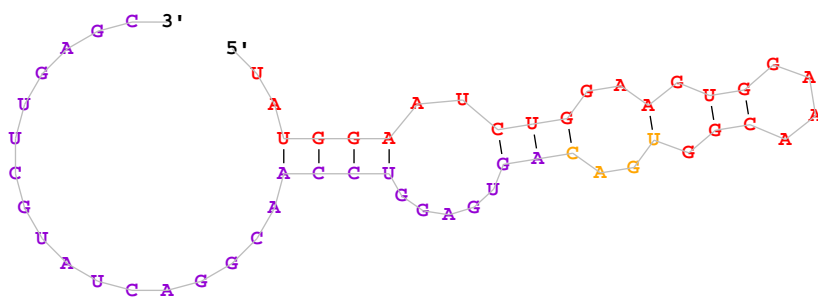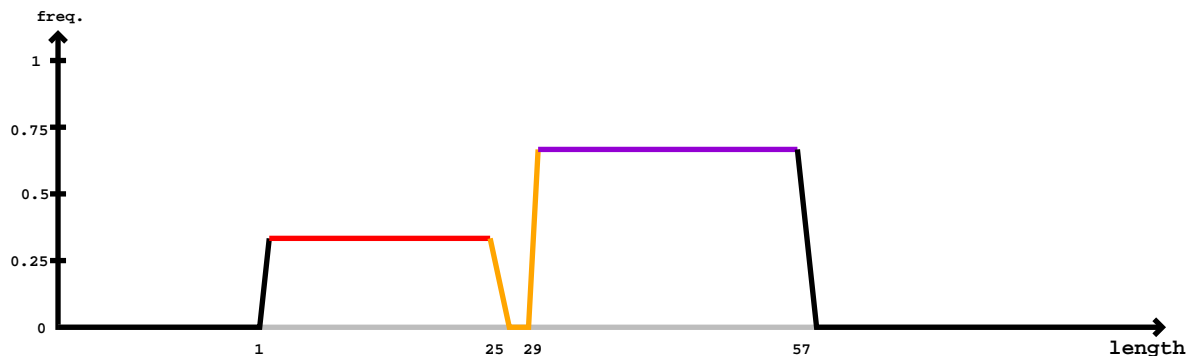

**Mature** **Star**

| 5' - | gacaguuugggucugcucg | uauggaucuggaaguggaaacggugaca | gugagguccaacggacuau | gcuugagc         | cuucucaaucaacuugauggauucgaagcguaa | aa               | -3'   | obs |        |  |
|------|---------------------|------------------------------|---------------------|------------------|-----------------------------------|------------------|-------|-----|--------|--|
|      | gacaguuugggucugcucg | uauggaucuggaaguggaaacggugaca | gugagguccaacggacuau | gcuugagc         | cuucucaaucaacuugauggauucgaagcguaa | aa               | exp   |     |        |  |
|      | (((((.....))))))    | (((((.....))))))             | (((((.....))))))    | (((((.....)))))) | (((((.....))))))                  | (((((.....)))))) | reads | mm  | sample |  |
|      | .....               | uauggaucuggaaguggaaacgA..... | .....               | .....            | .....                             | .....            | 1     | 1   | S03    |  |
|      | .....               | .....                        | .....               | .....            | .....                             | .....            | 1     | 0   | S04    |  |
|      | .....               | .....                        | .....               | .....            | .....                             | .....            | 1     | 1   | S04    |  |

Provisional ID : chrA02\_99971  
 Score total : 0.4  
 Score for star read(s) : 3.9  
 Score for read counts : -4.9  
 Score for mfe : 1.5  
 Score for randfold : 0  
 Score for cons. seed :  
 Total read count : 2  
 Mature read count : 1  
 Loop read count : 0  
 Star read count : 1

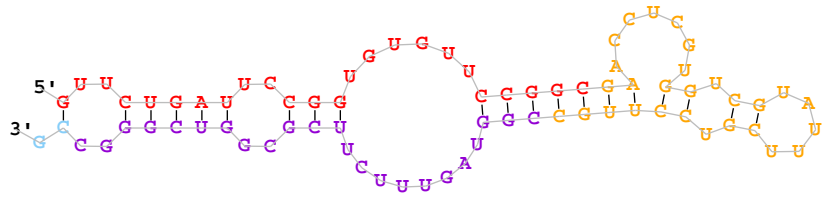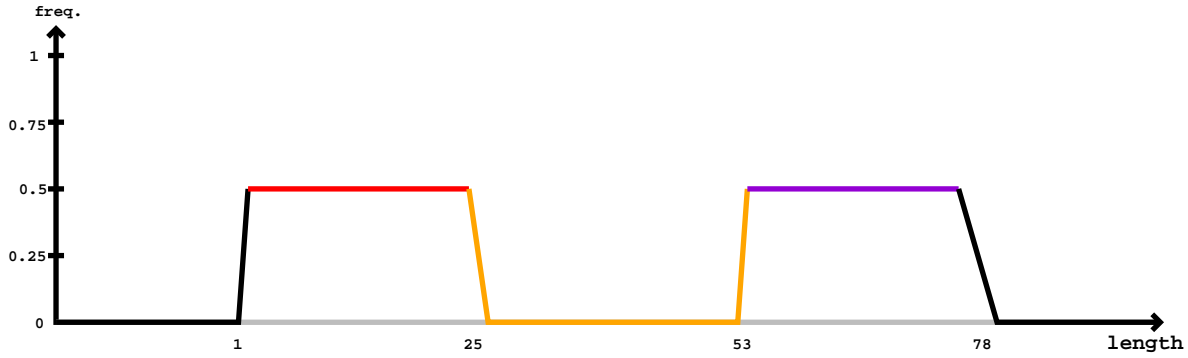

**Mature**

**Star**

|                                                                                                                                                                                                                                                                                                                                                                                                                                                                                                                            |                                                |            |                                                            |                                                           |
|----------------------------------------------------------------------------------------------------------------------------------------------------------------------------------------------------------------------------------------------------------------------------------------------------------------------------------------------------------------------------------------------------------------------------------------------------------------------------------------------------------------------------|------------------------------------------------|------------|------------------------------------------------------------|-----------------------------------------------------------|
| <p>5' - guuguaucugggugug<u>guucugauuc</u>cggu<u>guuc</u>cggggaaccucguggu<u>cguauuuc</u>gccuugc<u>cggu</u>aguuu<u>cuuc</u>cgggucggg<u>ccg</u>cgau<u>cguagg</u>aggugugu</p> <p>guuguaucugggugug<u>guucugauuc</u>cggu<u>guuc</u>cggggaaccucguggu<u>cguauuuc</u>gccuugc<u>cggu</u>aguuu<u>cuuc</u>cgggucggg<u>ccg</u>cgau<u>cguagg</u>aggugugu</p> <p>.....(((.....(((.....(((.....(((.....(((.....(((.....(((.....))).....))).....))).....))).....))).....))).....</p> <p>.....guucugauu<u>cggu</u>gug<u>guuc</u>ggc.....</p> | <p>.....cgguaguuu<u>cuuc</u>cgggucggg.....</p> | <p>-3'</p> | <p>obs</p> <p>exp</p> <p>reads</p> <p>mm</p> <p>sample</p> | <p>1</p> <p>1</p> <p>S03</p> <p>1</p> <p>0</p> <p>S04</p> |
|----------------------------------------------------------------------------------------------------------------------------------------------------------------------------------------------------------------------------------------------------------------------------------------------------------------------------------------------------------------------------------------------------------------------------------------------------------------------------------------------------------------------------|------------------------------------------------|------------|------------------------------------------------------------|-----------------------------------------------------------|

Provisional ID : chrA02\_101706  
 Score total : 2076.3  
 Score for star read(s) : 3.9  
 Score for read counts : 2070.5  
 Score for mfe : 1.9  
 Score for randfold : 0  
 Score for cons. seed :  
 Total read count : 4073  
 Mature read count : 3952  
 Loop read count : 4  
 Star read count : 117

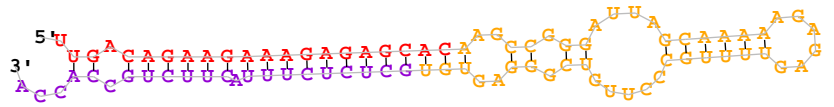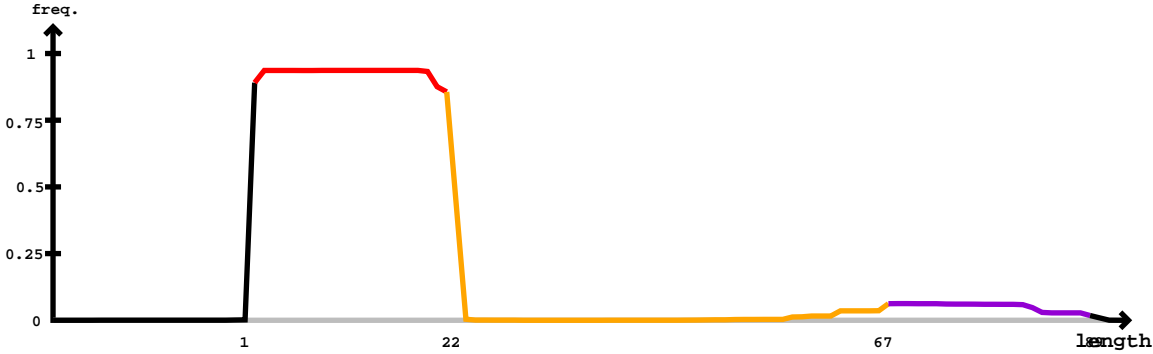

**Mature**

**Star**

| 5' |                                                                                         |                      | -3'                                                                    | obs |       |    |        |
|----|-----------------------------------------------------------------------------------------|----------------------|------------------------------------------------------------------------|-----|-------|----|--------|
|    |                                                                                         |                      |                                                                        | exp | reads | mm | sample |
| 5' | agaagacgaugagaaaaug                                                                     | uugacagaagaagagagcac | caagccgggaauuagcaaaaagagaguuuugcccuugucgggagugugcucucuuaucucgccaccauca | -3' |       |    |        |
|    | agaagacgaugagaaaaug                                                                     | uugacagaagaagagagcac | caagccgggaauuagcaaaaagagaguuuugcccuugucgggagugugcucucuuaucucgccaccauca |     |       |    |        |
|    | .....((((.....(((.....((((.....((((.....((((.....)))))))))))))))))))))))))))))))))))))) |                      |                                                                        |     |       |    |        |
|    | ..agacgaugagaaaauguugac.....                                                            |                      |                                                                        |     | 1     | 0  | S03    |
|    | .....uguugacagaagaagagagU.....                                                          |                      |                                                                        |     | 1     | 1  | S03    |
|    | .....uguugacagaagaagagagc.....                                                          |                      |                                                                        |     | 1     | 0  | S03    |
|    | .....guugacagaagaagagagcac.....                                                         |                      |                                                                        |     | 1     | 0  | S03    |
|    | .....uugacagaagaagagagU.....                                                            |                      |                                                                        |     | 3     | 1  | S03    |
|    | .....uugacagaagaagagag.....                                                             |                      |                                                                        |     | 1     | 0  | S03    |
|    | .....uugacagaagaagagagU.....                                                            |                      |                                                                        |     | 14    | 1  | S03    |
|    | .....uugacagaagaagagagc.....                                                            |                      |                                                                        |     | 75    | 0  | S03    |
|    | .....uugacagaagaagagagA.....                                                            |                      |                                                                        |     | 3     | 1  | S03    |
|    | .....uugacagaagaUagagagc.....                                                           |                      |                                                                        |     | 2     | 1  | S03    |
|    | .....uugacagaagaagagagG.....                                                            |                      |                                                                        |     | 1     | 1  | S03    |
|    | .....uugacagGagaagagagc.....                                                            |                      |                                                                        |     | 1     | 1  | S03    |
|    | .....uugacagaagaagagagUc.....                                                           |                      |                                                                        |     | 2     | 1  | S03    |
|    | .....uugacagaagaagagagcG.....                                                           |                      |                                                                        |     | 1     | 1  | S03    |
|    | .....uugacagaagaagagagca.....                                                           |                      |                                                                        |     | 22    | 0  | S03    |
|    | .....uugacagaagaUagagagca.....                                                          |                      |                                                                        |     | 5     | 1  | S03    |
|    | .....uugacagaagCaagagagca.....                                                          |                      |                                                                        |     | 1     | 1  | S03    |
|    | .....uugacagaagaagagUgcac.....                                                          |                      |                                                                        |     | 1     | 1  | S03    |
|    | .....uuCacagaagaagagagcac.....                                                          |                      |                                                                        |     | 1     | 1  | S03    |
|    | .....uugaUagaagaagagagcac.....                                                          |                      |                                                                        |     | 1     | 1  | S03    |
|    | .....uugacagaagaagagagcGc.....                                                          |                      |                                                                        |     | 4     | 1  | S03    |
|    | .....uugCcagaagaagagagcac.....                                                          |                      |                                                                        |     | 1     | 1  | S03    |
|    | .....uugacagaGgaagagagcac.....                                                          |                      |                                                                        |     | 3     | 1  | S03    |
|    | .....uugacagaagaUagagagcac.....                                                         |                      |                                                                        |     | 10    | 1  | S03    |
|    | .....uugacagaagaagagagAacac.....                                                        |                      |                                                                        |     | 4     | 1  | S03    |
|    | .....Nuagcagaagaagagagcac.....                                                          |                      |                                                                        |     | 2     | 1  | S03    |
|    | .....uugacagaagaagGgagcac.....                                                          |                      |                                                                        |     | 4     | 1  | S03    |
|    | .....uugUcagaagaagagagcac.....                                                          |                      |                                                                        |     | 2     | 1  | S03    |
|    | .....uugaAagaagaagagagcac.....                                                          |                      |                                                                        |     | 1     | 1  | S03    |
|    | .....uugGcagaagaagagagcac.....                                                          |                      |                                                                        |     | 5     | 1  | S03    |
|    | .....uGcagaagaagaagagagcac.....                                                         |                      |                                                                        |     | 10    | 1  | S03    |
|    | .....uugacagaagaaaAagagcac.....                                                         |                      |                                                                        |     | 2     | 1  | S03    |
|    | .....uugacagaagaagagagGac.....                                                          |                      |                                                                        |     | 1     | 1  | S03    |

Mature

Star

|                                                                                                                  |      |   |     |
|------------------------------------------------------------------------------------------------------------------|------|---|-----|
| agaagacgaugagaaaug <u>uugacagaagaagagagcacaagccgggaaagcaaaaagagaguuuugcccuugucgggagugugcucucuuaucugccaccauca</u> |      |   |     |
| .....uugacCgaagaagagagcac.....                                                                                   | 3    | 1 | S03 |
| .....uugacGgaagaagagagcac.....                                                                                   | 2    | 1 | S03 |
| .....uuAacagaagaagagagcac.....                                                                                   | 1    | 1 | S03 |
| .....uugacagaagaagagagcac.....                                                                                   | 5    | 1 | S03 |
| .....uugacagCagaagagagcac.....                                                                                   | 1    | 1 | S03 |
| .....uugacagaagaagagGgcac.....                                                                                   | 4    | 1 | S03 |
| .....uugacagaagaagUgagcac.....                                                                                   | 2    | 1 | S03 |
| .....uugacagGagaagagagcac.....                                                                                   | 2    | 1 | S03 |
| .....Cugacagaagaagagagcac.....                                                                                   | 5    | 1 | S03 |
| .....uugacUgaagaagagagcac.....                                                                                   | 2    | 1 | S03 |
| .....uugacagaagaagagagcaU.....                                                                                   | 179  | 1 | S03 |
| .....uugacagaagUaagagagcac.....                                                                                  | 1    | 1 | S03 |
| .....uugacagaagaagagagcaG.....                                                                                   | 2    | 1 | S03 |
| .....uugacagaagaagagCgcac.....                                                                                   | 1    | 1 | S03 |
| .....uugacagaagGaaagagagcac.....                                                                                 | 9    | 1 | S03 |
| .....uugacagaagaagagagcaA.....                                                                                   | 25   | 1 | S03 |
| .....uuUacagaagaagagagcac.....                                                                                   | 3    | 1 | S03 |
| .....uugacagaaAaaagagagcac.....                                                                                  | 1    | 1 | S03 |
| .....uGgacagaagaagagagcac.....                                                                                   | 2    | 1 | S03 |
| .....Gugacagaagaagagagcac.....                                                                                   | 4    | 1 | S03 |
| .....uugacagaagaagagagcUc.....                                                                                   | 3    | 1 | S03 |
| .....uugacagaagaagagagcac.....                                                                                   | 1143 | 0 | S03 |
| .....uugacagaagaagagagUac.....                                                                                   | 4    | 1 | S03 |
| .....uugacagaagUaagagagcaca.....                                                                                 | 1    | 1 | S03 |
| .....uugacagaagaagagagcaca.....                                                                                  | 20   | 0 | S03 |
| .....uugacagaagaagagagcacU.....                                                                                  | 39   | 1 | S03 |
| .....uugacagaagaagagagcacG.....                                                                                  | 5    | 1 | S03 |
| .....uugacagaagaagagagcacC.....                                                                                  | 6    | 1 | S03 |
| .....uugacagaagaagagagcacUa.....                                                                                 | 3    | 1 | S03 |
| .....ugacagaagaagagagc.....                                                                                      | 3    | 0 | S03 |
| .....ugacagaagaagagagU.....                                                                                      | 2    | 1 | S03 |
| .....ugacagaagaagagagca.....                                                                                     | 1    | 0 | S03 |
| .....Agacagaagaagagagca.....                                                                                     | 1    | 1 | S03 |
| .....ugacagaagaagagagcG.....                                                                                     | 1    | 1 | S03 |
| .....ugacagGagaagagagca.....                                                                                     | 1    | 1 | S03 |
| .....ugacagaagGaaagagagcac.....                                                                                  | 2    | 1 | S03 |
| .....ugacagaagaagagagcaU.....                                                                                    | 9    | 1 | S03 |
| .....ugacagaagaagagagcaA.....                                                                                    | 1    | 1 | S03 |
| .....ugacagaagaagagagcac.....                                                                                    | 51   | 0 | S03 |
| .....ugCcagaagaagagagcaca.....                                                                                   | 1    | 1 | S03 |
| .....ugacagaagaagagagcaca.....                                                                                   | 11   | 0 | S03 |
| .....ugacagaagaagagagcacU.....                                                                                   | 4    | 1 | S03 |
| .....aaagaagagagcacaagccgA.....                                                                                  | 2    | 1 | S03 |
| .....aaagagaguuuugcccuugucgggagug.....                                                                           | 1    | 0 | S03 |
| .....uuuugcccuugucgggagugcu.....                                                                                 | 1    | 0 | S03 |
| .....uuugcccuugucgggagugU.....                                                                                   | 1    | 1 | S03 |
| .....uugcccuugucgggagugcu.....                                                                                   | 1    | 0 | S03 |
| .....ugcccuugucgggagugcucU.....                                                                                  | 1    | 1 | S03 |
| .....ugcccuugucgggagugAgcucucu.....                                                                              | 1    | 1 | S03 |
| .....cccuugucgggagugcucuc.....                                                                                   | 3    | 0 | S03 |
| .....uugucgggagugcucucuuaacG.....                                                                                | 1    | 1 | S03 |
| .....ucgggagugcucucuuaacuuc.....                                                                                 | 9    | 0 | S03 |
| .....ucgggaCugugcucucuuaacuuc.....                                                                               | 1    | 1 | S03 |
| .....ucgggagugcucucuuaacuucC.....                                                                                | 3    | 1 | S03 |
| .....ucgggagugcucucuuaacuucA.....                                                                                | 2    | 1 | S03 |
| .....cgggagugcucucCuuacuucug.....                                                                                | 1    | 1 | S03 |
| .....gggagugcucucuuaacuuc.....                                                                                   | 2    | 0 | S03 |
| .....gggagugcucucuuaacuuc.....                                                                                   | 3    | 0 | S03 |
| .....gggagugcucucuuaacuucC.....                                                                                  | 2    | 1 | S03 |
| .....agugugcucucuuaacuucG.....                                                                                   | 1    | 1 | S03 |
| .....agugugcucucuuaacuucU.....                                                                                   | 1    | 1 | S03 |
| .....agugugcucucuuaacuucA.....                                                                                   | 3    | 1 | S03 |
| .....agCgugcucucuuaacuucug.....                                                                                  | 1    | 1 | S03 |
| .....agugugcucucuuaacuucug.....                                                                                  | 36   | 0 | S03 |
| .....agugugcucucuuaacuucugA.....                                                                                 | 2    | 1 | S03 |
| .....ugcucucuuaacuucugccacU.....                                                                                 | 1    | 1 | S03 |
| .....ugcucucuuaacuucugccacA.....                                                                                 | 1    | 1 | S03 |
| .....gucucuuaacuucugccacA.....                                                                                   | 1    | 1 | S03 |
| .....gucucuuaacuucugccacc.....                                                                                   | 7    | 0 | S03 |
| .....gucucuuaacuucugccacU.....                                                                                   | 10   | 1 | S03 |

Mature

Star

| Sequence                                                                                                                                 | Mature Count | Star Count | Category |
|------------------------------------------------------------------------------------------------------------------------------------------|--------------|------------|----------|
| agaagacgaugagaaaaug <u>uugacagaagaagagagcacaagccggg</u> uuagcaaaaagagaguuuuugcc <u>uuugucgggagugugcucucu</u> uuuacuucugcc <u>accauca</u> |              |            |          |
| .....gucucu <u>uuuacuucugccaccG</u> ...                                                                                                  | 1            | 1          | S03      |
| .....gucucu <u>uuuacuucugccaccU</u> ...                                                                                                  | 3            | 1          | S03      |
| .....gucucu <u>uuuacuucugccacca</u> ...                                                                                                  | 23           | 0          | S03      |
| .....gucucu <u>uuuacuucugccaccC</u> ...                                                                                                  | 1            | 1          | S03      |
| .....gucucu <u>uuuacuucugccaccau</u> ...                                                                                                 | 1            | 0          | S03      |
| .....cucu <u>uuuacuucugccacca</u> ...                                                                                                    | 1            | 0          | S03      |
| .....uguuagc <u>G</u> aaagaagagagcacaagc.....                                                                                            | 1            | 1          | S04      |
| .....guugacagaagaagagagc.....                                                                                                            | 1            | 0          | S04      |
| .....uugacagaagaagagagU.....                                                                                                             | 7            | 1          | S04      |
| .....uugacagaagaagagag.....                                                                                                              | 6            | 0          | S04      |
| .....uuUacagaagaagagagc.....                                                                                                             | 1            | 1          | S04      |
| .....uugacagaagUaagagagc.....                                                                                                            | 1            | 1          | S04      |
| .....uGgacagaagaagagagc.....                                                                                                             | 1            | 1          | S04      |
| .....uugacagaagaagagagCc.....                                                                                                            | 1            | 1          | S04      |
| .....uugacagaagaUagagagc.....                                                                                                            | 5            | 1          | S04      |
| .....uugacagaagaagagagU.....                                                                                                             | 16           | 1          | S04      |
| .....uugacagaagaagagagc.....                                                                                                             | 87           | 0          | S04      |
| .....uugacagUagaagagagc.....                                                                                                             | 1            | 1          | S04      |
| .....uugacagaagaagGgagc.....                                                                                                             | 1            | 1          | S04      |
| .....uugacagaagaagagagUc.....                                                                                                            | 3            | 1          | S04      |
| .....uugacagaagaagagagA.....                                                                                                             | 5            | 1          | S04      |
| .....uugacaAaagaagagagc.....                                                                                                             | 1            | 1          | S04      |
| .....uugacagaagaagGgagagc.....                                                                                                           | 1            | 1          | S04      |
| .....uugacagaagaagagagcG.....                                                                                                            | 3            | 1          | S04      |
| .....uugacagaGgaagagagca.....                                                                                                            | 1            | 1          | S04      |
| .....uugacagaagaagGgagagca.....                                                                                                          | 1            | 1          | S04      |
| .....uugacagaagaUagagagca.....                                                                                                           | 7            | 1          | S04      |
| .....uugacagaagaagagagca.....                                                                                                            | 30           | 0          | S04      |
| .....Nugacagaagaagagagcac.....                                                                                                           | 3            | 1          | S04      |
| .....uugacGgaagaagagagcac.....                                                                                                           | 1            | 1          | S04      |
| .....Augacagaagaagagagcac.....                                                                                                           | 2            | 1          | S04      |
| .....uugacagaagUaagagagcac.....                                                                                                          | 3            | 1          | S04      |
| .....uugacagaagaagagagUcac.....                                                                                                          | 1            | 1          | S04      |
| .....uugaUagaagaagagagcac.....                                                                                                           | 1            | 1          | S04      |
| .....uAgacagaagaagagagcac.....                                                                                                           | 1            | 1          | S04      |
| .....uGgacagaagaagagagcac.....                                                                                                           | 5            | 1          | S04      |
| .....uugacagaagaagagagUac.....                                                                                                           | 2            | 1          | S04      |
| .....uugacagaagGaaagagagcac.....                                                                                                         | 8            | 1          | S04      |
| .....uugacagaagaagagagcaU.....                                                                                                           | 231          | 1          | S04      |
| .....uugacagaagaaaUagagcac.....                                                                                                          | 1            | 1          | S04      |
| .....uugacagaagaagagagAac.....                                                                                                           | 2            | 1          | S04      |
| .....uugacagaagaagaAagcac.....                                                                                                           | 1            | 1          | S04      |
| .....Cugacagaagaagagagcac.....                                                                                                           | 2            | 1          | S04      |
| .....uugacagaagaagGgagagcac.....                                                                                                         | 7            | 1          | S04      |
| .....uugacagaagaagagagcac.....                                                                                                           | 1410         | 0          | S04      |
| .....uugGcagaagaagagagcac.....                                                                                                           | 7            | 1          | S04      |
| .....uugacagaagCaagagagcac.....                                                                                                          | 1            | 1          | S04      |
| .....uugacagaagaagGgagcac.....                                                                                                           | 5            | 1          | S04      |
| .....uugacagaagaagagagAac.....                                                                                                           | 2            | 1          | S04      |
| .....uugacagaagaaaAagagcac.....                                                                                                          | 1            | 1          | S04      |
| .....uugacagaagaagagUgcac.....                                                                                                           | 1            | 1          | S04      |
| .....uugacagGagaagagagcac.....                                                                                                           | 5            | 1          | S04      |
| .....uugacagaagaUagagagcac.....                                                                                                          | 34           | 1          | S04      |
| .....uugacagaagaagagagcGc.....                                                                                                           | 5            | 1          | S04      |
| .....Gugacagaagaagagagcac.....                                                                                                           | 6            | 1          | S04      |
| .....uugacagaGgaagagagcac.....                                                                                                           | 5            | 1          | S04      |
| .....uugacagaagaagagagCcac.....                                                                                                          | 1            | 1          | S04      |
| .....uugacagaaAaagagagcac.....                                                                                                           | 1            | 1          | S04      |
| .....uugacUgaagaagagagcac.....                                                                                                           | 4            | 1          | S04      |
| .....uugacGgaagaagagagcac.....                                                                                                           | 3            | 1          | S04      |
| .....uugacagaagaagagGgcac.....                                                                                                           | 4            | 1          | S04      |
| .....uugacagaagaaaNagagcac.....                                                                                                          | 1            | 1          | S04      |
| .....uugacagaagaagagagcCc.....                                                                                                           | 2            | 1          | S04      |
| .....uuUacagaagaagagagcac.....                                                                                                           | 2            | 1          | S04      |
| .....uugacagaagaagagagcaA.....                                                                                                           | 35           | 1          | S04      |
| .....uugacagaagaagagCgcac.....                                                                                                           | 1            | 1          | S04      |
| .....uugacagaagaagagagcUc.....                                                                                                           | 2            | 1          | S04      |
| .....uugacaUaagaagagagcac.....                                                                                                           | 1            | 1          | S04      |
| .....Gugacagaagaagagagcaca.....                                                                                                          | 1            | 1          | S04      |

Mature

Star

|                                                                                                                     |    |   |     |
|---------------------------------------------------------------------------------------------------------------------|----|---|-----|
| agaagacgaugagaaaaug <u>uugacagaagaagagagcacaagccgggauuagcaaaaagagaguuuugcccuugucgggagugugcucucuuaacuugccaccauca</u> |    |   |     |
| .....uugacagaagaagagagcagC.....                                                                                     | 6  | 1 | S04 |
| .....uugacagaagaagagagcC.....                                                                                       | 5  | 1 | S04 |
| .....uugacagaagaagagagcaca.....                                                                                     | 23 | 0 | S04 |
| .....uugacagaagaagagagcU.....                                                                                       | 61 | 1 | S04 |
| .....uugacagaagaagagagcCa.....                                                                                      | 2  | 1 | S04 |
| .....uugacagaagaagagagcUa.....                                                                                      | 2  | 1 | S04 |
| .....uugacagaagaagagagcacaU.....                                                                                    | 3  | 1 | S04 |
| .....uugacagaagaagagagcacia.....                                                                                    | 1  | 0 | S04 |
| .....ugacagGagaagagagc.....                                                                                         | 1  | 1 | S04 |
| .....ugacagaagaagagagU.....                                                                                         | 2  | 1 | S04 |
| .....ugacagaagaagagagc.....                                                                                         | 9  | 0 | S04 |
| .....ugacagaagaagagagca.....                                                                                        | 7  | 0 | S04 |
| .....uAacagaagaagagagc.....                                                                                         | 1  | 1 | S04 |
| .....ugacagaagaagagagcaU.....                                                                                       | 7  | 1 | S04 |
| .....ugacagaagaagUgagc.....                                                                                         | 1  | 1 | S04 |
| .....ugacagaagaagagagcaA.....                                                                                       | 1  | 1 | S04 |
| .....Ggacagaagaagagagc.....                                                                                         | 2  | 1 | S04 |
| .....ugacagaagaagagagc.....                                                                                         | 52 | 0 | S04 |
| .....ugacagaagaagGgagc.....                                                                                         | 1  | 1 | S04 |
| .....ugCcagaagaagagagc.....                                                                                         | 1  | 1 | S04 |
| .....uUacagaagaagagagc.....                                                                                         | 1  | 1 | S04 |
| .....ugacagaagaagaUagcaca.....                                                                                      | 1  | 1 | S04 |
| .....ugacagaagaagagagcU.....                                                                                        | 10 | 1 | S04 |
| .....ugacagaagaagagagcaca.....                                                                                      | 5  | 0 | S04 |
| .....ugacagaagaagagagcC.....                                                                                        | 1  | 1 | S04 |
| .....ugacagaagaagagagcacaU.....                                                                                     | 2  | 1 | S04 |
| .....uugcccuugucgggagugugcucuc.....                                                                                 | 1  | 0 | S04 |
| .....cccuugucgggagugugcucuuu.....                                                                                   | 1  | 0 | S04 |
| .....cccuugucgggagugugcucuuua.....                                                                                  | 1  | 0 | S04 |
| .....ccuugucgggagugugcucuuua.....                                                                                   | 1  | 0 | S04 |
| .....ucgggagugugcucuuuacuuc.....                                                                                    | 1  | 0 | S04 |
| .....ucgggagugugcucuuuacuucC.....                                                                                   | 3  | 1 | S04 |
| .....ucgggagugugcucuuuacuuc.....                                                                                    | 15 | 0 | S04 |
| .....ucgggagugugcucuuuacuucA.....                                                                                   | 3  | 1 | S04 |
| .....ucgggagugugcucCuuacuuc.....                                                                                    | 1  | 1 | S04 |
| .....cgggagugugcucuuuacuuc.....                                                                                     | 1  | 0 | S04 |
| .....cgggagugugcucuuuacuucg.....                                                                                    | 1  | 0 | S04 |
| .....gggagugugcucuuuacuuc.....                                                                                      | 1  | 0 | S04 |
| .....gggagugugcucuuuacuuc.....                                                                                      | 4  | 0 | S04 |
| .....agugugcucuuuacuuc.....                                                                                         | 1  | 0 | S04 |
| .....agGgugcucuuuacuucg.....                                                                                        | 1  | 1 | S04 |
| .....agugugcucuuuacuucA.....                                                                                        | 6  | 1 | S04 |
| .....agugugcucuuuacuucg.....                                                                                        | 22 | 0 | S04 |
| .....agugugcucuuuacuucU.....                                                                                        | 1  | 1 | S04 |
| .....agugugcucCuuuacuucg.....                                                                                       | 2  | 1 | S04 |
| .....agugugcucuuuacuucgA.....                                                                                       | 5  | 1 | S04 |
| .....ugcucuuuacuucgcca.....                                                                                         | 1  | 0 | S04 |
| .....gcucuuuacuucgcca.....                                                                                          | 12 | 0 | S04 |
| .....gcucuuuacuucgccaA.....                                                                                         | 1  | 1 | S04 |
| .....gcucuuuacuucgccaG.....                                                                                         | 1  | 1 | S04 |
| .....gcucuuuacuucgcca.....                                                                                          | 1  | 1 | S04 |
| .....gcucuuuacuucgccaU.....                                                                                         | 6  | 1 | S04 |
| .....gcucuuuacuucgccaC.....                                                                                         | 1  | 1 | S04 |
| .....gcucuuuacuucgccaC.....                                                                                         | 1  | 1 | S04 |
| .....gcucuuuacuucgccaUa.....                                                                                        | 1  | 1 | S04 |
| .....gcGcucuuuacuucgcca.....                                                                                        | 1  | 1 | S04 |
| .....gcucuuuacuucgcca.....                                                                                          | 37 | 0 | S04 |
| .....gcucuuuacuucgcca.....                                                                                          | 1  | 1 | S04 |
| .....gcucuuuacuucgcca.....                                                                                          | 1  | 0 | S04 |
| .....cucuuuacuucgcca.....                                                                                           | 1  | 0 | S04 |
| .....ucuuuacuucgcca.....                                                                                            | 1  | 0 | S04 |







Star

Mature

|                                                                                                                                                                                                                      |    |   |     |
|----------------------------------------------------------------------------------------------------------------------------------------------------------------------------------------------------------------------|----|---|-----|
| aaaa <b>caucuc</b> ucaacuuuu <b>aacua</b> aaaaaa <b>acaauaaccg</b> acucua <b>ag</b> uau <b>cu</b> uaguu <b>uaag</b> g <b>cc</b> aguuuu <b>aguuuuuuu</b> u <b>aguu</b> aaaa <b>aguu</b> aagagacgguuucuu <b>ua</b> uuc |    |   |     |
| .....uuuaguu <b>aaaa</b> g <b>uu</b> aagagacg.....                                                                                                                                                                   | 1  | 0 | S04 |
| .....uuuaguu <b>aaaa</b> g <b>uu</b> aagagacgg.....                                                                                                                                                                  | 5  | 0 | S04 |
| .....uuuaguu <b>aaaa</b> g <b>uu</b> aagagacgg <b>C</b> .....                                                                                                                                                        | 1  | 1 | S04 |
| .....uuuaguu <b>aaaa</b> g <b>uu</b> aagagacgg <b>u</b> .....                                                                                                                                                        | 1  | 1 | S04 |
| .....uuuaguu <b>aaaa</b> g <b>uu</b> aagagacgg <b>u</b> .....                                                                                                                                                        | 30 | 0 | S04 |
| .....uuuaguu <b>aaaa</b> g <b>uu</b> aag <b>G</b> acgg <b>u</b> .....                                                                                                                                                | 2  | 1 | S04 |
| .....uuaguu <b>aaaa</b> g <b>uu</b> aagagacgg.....                                                                                                                                                                   | 2  | 0 | S04 |
| .....uuaguu <b>aaaa</b> g <b>uu</b> aagagacgg <b>u</b> .....                                                                                                                                                         | 3  | 0 | S04 |
| .....uaguu <b>aaaa</b> g <b>uu</b> Cagagacgg <b>u</b> .....                                                                                                                                                          | 1  | 1 | S04 |
| .....agu <b>aaaa</b> g <b>uu</b> aagagacgg.....                                                                                                                                                                      | 2  | 0 | S04 |
| .....agu <b>aaaa</b> g <b>uu</b> aagagacgg <b>u</b> .....                                                                                                                                                            | 3  | 0 | S04 |
| .....agu <b>aaaa</b> g <b>uu</b> aagagacgg <b>C</b> .....                                                                                                                                                            | 2  | 1 | S04 |
| .....gu <b>aaaa</b> g <b>uu</b> aagagacgg <b>u</b> .....                                                                                                                                                             | 1  | 0 | S04 |
| .....gu <b>aaaa</b> g <b>uu</b> aagagacgg <b>uu</b> uc <b>u</b> .....                                                                                                                                                | 3  | 0 | S04 |
| .....uu <b>aaaa</b> g <b>uu</b> aagagacgg <b>u</b> .....                                                                                                                                                             | 1  | 0 | S04 |
| .....uu <b>aaaa</b> g <b>uu</b> aagagacgg <b>uu</b> uc <b>u</b> .....                                                                                                                                                | 1  | 0 | S04 |
| .....uu <b>aaaa</b> g <b>uu</b> aagagacgg <b>uu</b> uc <b>u</b> .....                                                                                                                                                | 2  | 0 | S04 |
| .....uu <b>aa</b> g <b>uu</b> aagagacgg <b>uu</b> uc <b>u</b> G.....                                                                                                                                                 | 1  | 1 | S04 |
| .....g <b>uu</b> aagagacgg <b>uu</b> uc <b>u</b> G.....                                                                                                                                                              | 1  | 1 | S04 |
| .....g <b>uu</b> aagagacgg <b>uu</b> uc <b>u</b> G <b>a</b> .....                                                                                                                                                    | 1  | 1 | S04 |

Provisional ID : chrA02\_128683  
 Score total : 1  
 Score for star read(s) : -1.3  
 Score for read counts : 0  
 Score for mfe : 2.3  
 Score for randfold : 0  
 Score for cons. seed :  
 Total read count : 18  
 Mature read count : 18  
 Loop read count : 0  
 Star read count : 0

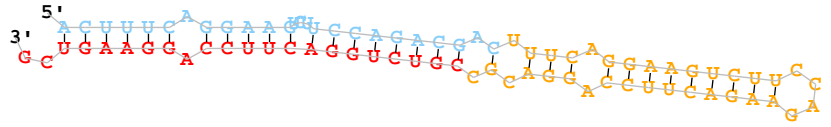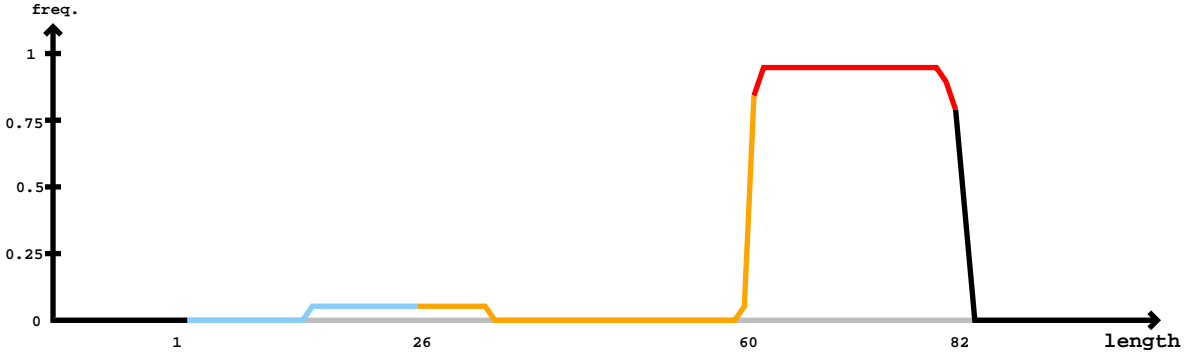

**Star**

**Mature**

5' - **augcgcuagacg****acuuucaggaaguc****uuccagacgacuuucaggaaguc****uuccaggaaguc****uuccaggaagac****gcgcgucuggacuuccaggaaguc****gucagucgucugacaaaguc** -3' exp

| Sequence                         | reads | mm | sample |
|----------------------------------|-------|----|--------|
| .....cuuccagacgacuuAcagg.....    | 1     | 1  | S03    |
| .....cgucuggacuuccaggaagucg..... | 1     | 0  | S03    |
| .....cgucuggacuuccaggaaguc.....  | 1     | 0  | S03    |
| .....cgucuggacuuccaggaagucg..... | 3     | 0  | S03    |
| .....gucuggacuuccaggaagucg.....  | 2     | 0  | S03    |
| .....cgucuggacuuccaggaaguc.....  | 1     | 1  | S04    |
| .....cgucuggacuuccaggaagucg..... | 1     | 1  | S04    |
| .....cgucuggacuuccaggaaguc.....  | 1     | 1  | S04    |
| .....cgucuggacuuccaggaagucg..... | 7     | 0  | S04    |
| .....cgucuggacuuccaggaagucg..... | 1     | 1  | S04    |

Provisional ID : chrA02\_135723  
 Score total : 0.8  
 Score for star read(s) : 3.9  
 Score for read counts : -4.9  
 Score for mfe : 1.9  
 Score for randfold : 0  
 Score for cons. seed :  
 Total read count : 2  
 Mature read count : 1  
 Loop read count : 0  
 Star read count : 1

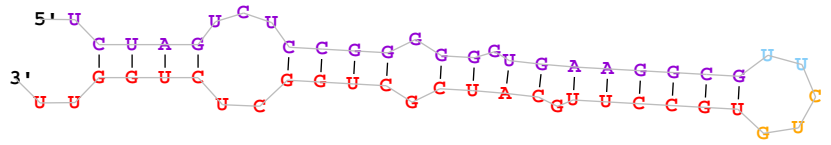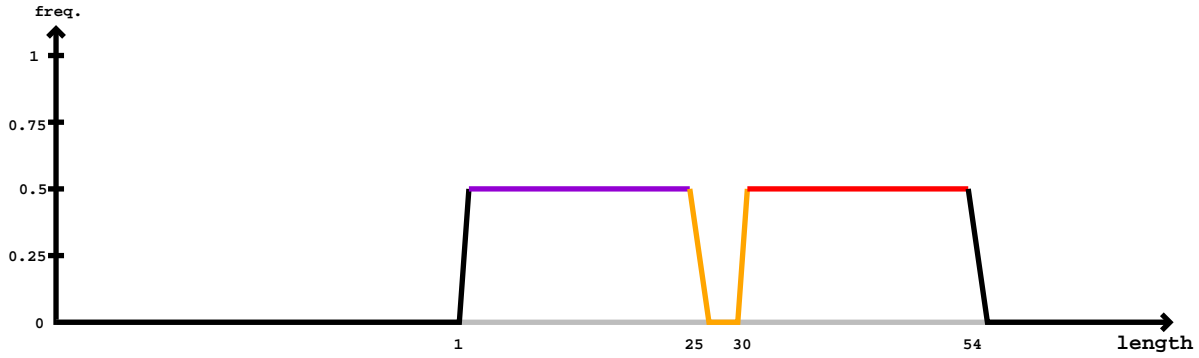

Star
Mature

|                                                                                                                                                                                                                                                                                                                                                                                                                                                                                                    |                                            |                                |
|----------------------------------------------------------------------------------------------------------------------------------------------------------------------------------------------------------------------------------------------------------------------------------------------------------------------------------------------------------------------------------------------------------------------------------------------------------------------------------------------------|--------------------------------------------|--------------------------------|
| 5' - uuccgggagggcgggaugcuucuaaagcucugcuaucgcccggc <u>uc</u> uagucuccgggggugaaggc <u>gu</u> uugugccuugcaucgcuggcucugguuucccuaguucuguuuuaggg<br>uuccgggagggcgggaugcuucuaaagcucugcuaucgcccggc <u>cu</u> uagucuccgggggugaaggc <u>gu</u> uugugccuugcaucgcuggcucugguuucccuaguucuguuuuaggg<br>..((((((((((((((((.....))))))))))..))))..((((.....((((((((((((((((.....))))))))))..))))..))))..((((.....))))))<br>.....uc <u>u</u> agucuccgggggugaaggc <u>λ</u> .....<br>.....ugccuugcaucgcuggcucugguu..... | -3'<br>obs<br>exp<br>reads<br>mm<br>sample | 1<br>1<br>1<br>0<br>S04<br>S04 |
|----------------------------------------------------------------------------------------------------------------------------------------------------------------------------------------------------------------------------------------------------------------------------------------------------------------------------------------------------------------------------------------------------------------------------------------------------------------------------------------------------|--------------------------------------------|--------------------------------|



Star

Mature

uuugauggguaauauguaaaauaaaucauuguuuuuuuguauuuaucaagaguucguaacuuuuucugcuuuuuuuuggaauugugaaauuuugauucuaaauuuauuaaaauaa

|                                        |     |   |     |
|----------------------------------------|-----|---|-----|
| .....Cuuggaaugugaaaauuu.....           | 1   | 1 | S03 |
| .....uuuggaaugugaaaauuu.....           | 2   | 0 | S03 |
| .....uuuuggaauugugaaaauuu.....         | 1   | 0 | S03 |
| .....uuuuggaauugugaaauuuu.....         | 1   | 0 | S03 |
| .....uuuuggaauugugaaauuuauug.....      | 12  | 0 | S03 |
| .....uuuuggaauugugaaauuuauuG.....      | 1   | 1 | S03 |
| .....uuuuggaauugugaaauuuauuga.....     | 3   | 0 | S03 |
| .....Cuuggaaugugaaauuuugau.....        | 1   | 1 | S03 |
| .....uuuuggaauugugaaauuuugaA.....      | 1   | 1 | S03 |
| .....uuuuggaauugUaaauuuugau.....       | 1   | 1 | S03 |
| .....uuuuggaauugugaaauuuugau.....      | 29  | 0 | S03 |
| .....uuuuggaauugugaGauuuuugaau.....    | 2   | 1 | S03 |
| .....uuuuggaauugugaaauuuugauC.....     | 19  | 1 | S03 |
| .....uuuuggaauugugaaauuuugauu.....     | 170 | 0 | S03 |
| .....uuuuggaauugAaaauuuugaau.....      | 1   | 1 | S03 |
| .....uuuuggaauugugaaauuuugaCu.....     | 2   | 1 | S03 |
| .....uuuuggaauugugaaauuuugaUG.....     | 3   | 1 | S03 |
| .....uuuuggaauugUaaauuuugaau.....      | 9   | 1 | S03 |
| .....uuuuggaauugGaaauuuugaau.....      | 2   | 1 | S03 |
| .....Cuuggaaugugaaauuuugau.....        | 1   | 1 | S03 |
| .....Auuuggaauugugaaauuuugaau.....     | 1   | 1 | S03 |
| .....uuuuggaauugugaaauuuugaUA.....     | 1   | 1 | S03 |
| .....uuuuggaauugUaaauuuugaau.....      | 1   | 1 | S03 |
| .....uuuuggaauugugaaauuuauug.....      | 5   | 0 | S03 |
| .....uuuuggaauugugaaauuuuga.....       | 2   | 0 | S03 |
| .....uuuuggaauugugaaauuuugUu.....      | 1   | 1 | S03 |
| .....uuuuggaauugugaaauuuugaC.....      | 1   | 1 | S03 |
| .....uuuuggaauugugaaauuuugaU.....      | 13  | 0 | S03 |
| .....uuuuggaauugugaaauuuugaUC.....     | 19  | 1 | S03 |
| .....uuuUgaaugugaaauuuugaau.....       | 1   | 1 | S03 |
| .....uuuUgaaugugaaauuuugUu.....        | 1   | 1 | S03 |
| .....uuuuggaauugCgaaauuuugaau.....     | 1   | 1 | S03 |
| .....Guuggaaugugaaauuuugaau.....       | 3   | 1 | S03 |
| .....uuuuggaauugugaaauuuugaUG.....     | 10  | 1 | S03 |
| .....uuuuggaauugugaaauuuugaUA.....     | 5   | 1 | S03 |
| .....uuuuggaauugugaaauuuugaau.....     | 143 | 0 | S03 |
| .....uuuuggaauugugaaauuuugaCu.....     | 2   | 1 | S03 |
| .....uuuuggaauugUaaauuuugaau.....      | 5   | 1 | S03 |
| .....uuuuggaauugugaaauuuugGuu.....     | 1   | 1 | S03 |
| .....uuuuggaauugugaaauuuugaUUC.....    | 80  | 0 | S03 |
| .....uuuuggaauugCgaaauuuugaUUC.....    | 1   | 1 | S03 |
| .....uuuuggaauugUaaauuuugaUUC.....     | 3   | 1 | S03 |
| .....uuuugUaaugugaaauuuugaUUC.....     | 1   | 1 | S03 |
| .....uuuuggaauugugaaauuuugaUUG.....    | 2   | 1 | S03 |
| .....uuuuggaauugugaaauuuugaUUCA.....   | 2   | 1 | S03 |
| .....uuggaaugugaaauuuauug.....         | 1   | 0 | S03 |
| .....uuggaaugGgaaauuuauuga.....        | 1   | 1 | S03 |
| .....uuggaaugugaaauuuauugUu.....       | 1   | 1 | S03 |
| .....uuggaaugugaaauuuauugaU.....       | 4   | 0 | S03 |
| .....uuggaaugugugaaauuuauugaC.....     | 3   | 1 | S03 |
| .....uuggaaugUaaauuuauugaau.....       | 1   | 1 | S03 |
| .....uuggaaugugaaauuuauugaau.....      | 25  | 0 | S03 |
| .....uuggaaugUaaauuuauugaUUC.....      | 1   | 1 | S03 |
| .....uuggaaugugugaaauuuauugaCUC.....   | 1   | 1 | S03 |
| .....uuggaaugugugaaauuuauugaUUC.....   | 14  | 0 | S03 |
| .....uuggaaugGgaaauuuauugaUUCu.....    | 1   | 1 | S03 |
| .....uuggaaugugugaaauuuauugaUUCu.....  | 37  | 0 | S03 |
| .....NuggaaugugugaaauuuauugaUUCu.....  | 1   | 1 | S03 |
| .....uuggaaugugugaaauuuauugaUUCa.....  | 4   | 1 | S03 |
| .....uuggaaugugugaaauuuauugaUUCc.....  | 9   | 1 | S03 |
| .....uuggaaugugugaaauuuauugaUUCuU..... | 1   | 1 | S03 |
| .....uggaauugugugaaauuuauug.....       | 3   | 0 | S03 |
| .....uggaauugUaaauuuauuga.....         | 1   | 1 | S03 |
| .....uggaauugugugaaauuuauugaU.....     | 3   | 0 | S03 |
| .....uggaauugugugaaauuuauugaC.....     | 1   | 1 | S03 |
| .....uggaauugugugaaauuuauugaau.....    | 11  | 0 | S03 |
| .....uggaauugUaaauuuauugaau.....       | 1   | 1 | S03 |
| .....uggaauugugugaaauuuauugaUC.....    | 1   | 1 | S03 |
| .....ugUaaugugugugaaauuuauugaUUC.....  | 1   | 1 | S03 |



**Star**

**Mature**

| Sequence                            | Star | Mature | Category |
|-------------------------------------|------|--------|----------|
| .....Cuuuggaaugugaaaauuuugauu.....  | 2    | 1      | S04      |
| .....uuuuggaaugugaGauuuuugauu.....  | 2    | 1      | S04      |
| .....uuuuggaauguUaaaauuuugauu.....  | 9    | 1      | S04      |
| .....uuuuggaaugugaaaauuuugauG.....  | 2    | 1      | S04      |
| .....uuuggaaugugaaaauuu.....        | 2    | 0      | S04      |
| .....uAuggaaugugaaaauuu.....        | 1    | 1      | S04      |
| .....uuuggaaugugaaaauuu.....        | 1    | 0      | S04      |
| .....uuuggaaugugaaaauuuug.....      | 10   | 0      | S04      |
| .....uuuggaauguUaaaauuuuga.....     | 1    | 1      | S04      |
| .....uuuggaaugugaaaauuuugG.....     | 1    | 1      | S04      |
| .....uuuggaaugugaaaauuuuga.....     | 5    | 0      | S04      |
| .....uuuggaaugugaaaUuuuugau.....    | 1    | 1      | S04      |
| .....uuuggaGugugaaaauuuugau.....    | 2    | 1      | S04      |
| .....uuuggaaugugaaaauuuugau.....    | 17   | 0      | S04      |
| .....uuuggaaugAaaaauuuugau.....     | 1    | 1      | S04      |
| .....uuuggaaugugaaaauuuugaA.....    | 1    | 1      | S04      |
| .....uuuggaaugugaaaauuuugaC.....    | 2    | 1      | S04      |
| .....uuuggaauguUaaaauuuugau.....    | 1    | 1      | S04      |
| .....uuuggaaugaaaUuuuugauu.....     | 1    | 1      | S04      |
| .....uuuggaaugugUaaaauuuugauu.....  | 1    | 1      | S04      |
| .....uuuggaaugCgaaaauuuugauu.....   | 1    | 1      | S04      |
| .....uuuggaaugugaaaauuuugaA.....    | 6    | 1      | S04      |
| .....uuuggaaugugaCauuuuugauu.....   | 1    | 1      | S04      |
| .....uuuggaaugugaaaauuuugauG.....   | 9    | 1      | S04      |
| .....uuuggaaugAaaaauuuugauu.....    | 2    | 1      | S04      |
| .....uuuggaaugugaaaauuuugauu.....   | 240  | 0      | S04      |
| .....uuuggaauguUaaaauuuugauu.....   | 17   | 1      | S04      |
| .....uuuUgaaugugaaaauuuugauu.....   | 1    | 1      | S04      |
| .....uuuggaaugugaaaauuuugauC.....   | 24   | 1      | S04      |
| .....uuuggaaugugaaaauuuugaCu.....   | 1    | 1      | S04      |
| .....uuuggaauguCaaaauuuugauu.....   | 1    | 1      | S04      |
| .....uuuUgaaugugaaaauuuugauuc.....  | 1    | 1      | S04      |
| .....uuuggaauguUaaaauuuugauuc.....  | 1    | 1      | S04      |
| .....uuuggaGugugaaaauuuugauuc.....  | 2    | 1      | S04      |
| .....uuuggaaugugaaaauuuugauGc.....  | 1    | 1      | S04      |
| .....uuuggaaugugaaaauuuugauuG.....  | 1    | 1      | S04      |
| .....uuuggaaugugaaaauuuugauuc.....  | 93   | 0      | S04      |
| .....uuuggaaugugaaaauuuugaucA.....  | 1    | 1      | S04      |
| .....uuggaaugugaaaauuu.....         | 1    | 0      | S04      |
| .....uuggaaugugaaaauuuug.....       | 2    | 0      | S04      |
| .....uAggaaugugaaaauuuuga.....      | 1    | 1      | S04      |
| .....uuggaaugugaaaauuuuga.....      | 3    | 0      | S04      |
| .....uuggaaugugaaaauuuugau.....     | 5    | 0      | S04      |
| .....uuggaaugugaaaauuuugUuu.....    | 1    | 1      | S04      |
| .....uuggaaugugaaaauuuugauC.....    | 3    | 1      | S04      |
| .....uuggaaugugaaaauuuugauG.....    | 1    | 1      | S04      |
| .....uuggaaugugaaaauuuugauu.....    | 26   | 0      | S04      |
| .....uAggaaugugaaaauuuugauuc.....   | 1    | 1      | S04      |
| .....uuggaaugugaaaauuuugGuuc.....   | 1    | 1      | S04      |
| .....uuggaaugugaaaauuuugaCuc.....   | 1    | 1      | S04      |
| .....uuggaaugugaaaauuuugauuG.....   | 2    | 1      | S04      |
| .....uuggaaugugaaaauuuugauuc.....   | 26   | 0      | S04      |
| .....uuggaaugugaaaauuuugauuc.....   | 41   | 0      | S04      |
| .....uuggaaugugaaaauuuugauucA.....  | 7    | 1      | S04      |
| .....Cuggaaugugaaaauuuugauucu.....  | 1    | 1      | S04      |
| .....uuggaaugugaaaauuuugauCcu.....  | 1    | 1      | S04      |
| .....uuggaaugugaaaauuuugauucC.....  | 6    | 1      | S04      |
| .....uuggaaugugaaaauuuugauucuU..... | 1    | 1      | S04      |
| .....uuggaaugugaaaauuuugauucuC..... | 1    | 1      | S04      |
| .....uggaaugugaaaauuuug.....        | 1    | 0      | S04      |
| .....uggaaugCgaaaauuuuga.....       | 1    | 1      | S04      |
| .....uggaaugugaaaauuuuga.....       | 2    | 0      | S04      |
| .....uggaaugugaaaauuuugau.....      | 7    | 0      | S04      |
| .....uggaaugugaaaauuuugaCu.....     | 1    | 1      | S04      |
| .....uggaaugugaaaauuuugauu.....     | 13   | 0      | S04      |
| .....uggaaugugaaaauuuugauC.....     | 1    | 1      | S04      |
| .....uggaauguUaaaauuuugauu.....     | 1    | 1      | S04      |
| .....uggaaugugaaaauuuugauuc.....    | 24   | 0      | S04      |
| .....uggaaugugaaaauuuugauucu.....   | 4    | 0      | S04      |
| .....uggaaugugaaaauuuugauucA.....   | 47   | 1      | S04      |

Star

Mature

```

auuugauggguaaauauguaaaaaaaucuuuguuuuuuguaauuuuaucagagucguaacuuuuucugcuuuuuuuuggaaugugaaaauuuugaauucuaaaaauuuaaaaaa
.....uggaaugugaaaauuuugaauucua..... 3          0          S04
.....aaugugaaaauuuugaauucUG..... 1          1          S04
.....aaugugaaaauuuugaauucUGa..... 1          1          S04
.....augugaaaauuuugaauucuaaua..... 1          0          S04
.....uuuugaauucuaaaaauuua..... 1          0          S04
.....augaauucuaaaaUuuuuuuuu..... 1          1          S04
.....augaauucuaaaaauuuaau..... 3          0          S04

```









Star

Mature

|                                                                                                                                          |    |   |     |
|------------------------------------------------------------------------------------------------------------------------------------------|----|---|-----|
| cagaaggaccgaaucggauccaggauaguaaaauauuggaccgucaaaacuggaucggauccagauaucuuga <u>uuuuuu</u> agucggau <u>u</u> accggauc <u>g</u> uaaguuuuuuuu |    |   |     |
| .....uaccggauc <u>g</u> uaaguuuuuu.....                                                                                                  | 1  | 0 | S04 |
| .....uaccggauc <u>g</u> uaaguuuuuu.....                                                                                                  | 1  | 0 | S04 |
| .....uaccggauc <u>g</u> uaaguuuuuu.....                                                                                                  | 6  | 0 | S04 |
| .....uaccggauc <u>g</u> uaaguuuuuuuu.....                                                                                                | 1  | 0 | S04 |
| .....a <u>u</u> ccggauc <u>g</u> uaaguuuu.....                                                                                           | 1  | 0 | S04 |
| .....a <u>u</u> ccggauc <u>g</u> uaaguuuu.....                                                                                           | 2  | 0 | S04 |
| .....a <u>u</u> ccggauc <u>g</u> uaaguuuuuu.....                                                                                         | 1  | 0 | S04 |
| .....a <u>u</u> ccggauc <u>g</u> uaaguuuuuu.....                                                                                         | 3  | 0 | S04 |
| .....a <u>u</u> ccggauc <u>g</u> uaaguuuuuuuu.....                                                                                       | 12 | 0 | S04 |
| .....a <u>u</u> ccggauc <u>g</u> uaaguuuuuuuuC.....                                                                                      | 1  | 1 | S04 |
| .....a <u>u</u> ccggauc <u>g</u> uaaguuuuuuuuG.....                                                                                      | 6  | 1 | S04 |
| .....u <u>u</u> ccggauc <u>g</u> uaaguuuuuuuuC.....                                                                                      | 1  | 1 | S04 |
| .....u <u>u</u> ccggauc <u>g</u> uaaguuuuuuuu.....                                                                                       | 1  | 0 | S04 |
| .....u <u>u</u> ccggauc <u>g</u> uaaguuuuuuuuG.....                                                                                      | 1  | 1 | S04 |
| .....c <u>u</u> ggaucc <u>g</u> uaaguuuuuuuu.....                                                                                        | 1  | 0 | S04 |
| .....c <u>u</u> ggaucc <u>g</u> uaaguuuuuuuuG.....                                                                                       | 1  | 1 | S04 |
| .....c <u>u</u> ggaucc <u>g</u> uaaguuuuuuuu.....                                                                                        | 1  | 0 | S04 |
| .....c <u>u</u> ggaucc <u>g</u> uaaguuuuuuuuG.....                                                                                       | 1  | 1 | S04 |
| .....c <u>u</u> ggaucc <u>g</u> uaaguuuuuuuu.....                                                                                        | 1  | 0 | S04 |
| .....c <u>u</u> ggaucc <u>g</u> uaaguuuuuuuuG.....                                                                                       | 1  | 1 | S04 |
| .....c <u>u</u> ggaucc <u>g</u> uaaguuuuuuuu.....                                                                                        | 1  | 0 | S04 |

Provisional ID : chrA02\_199685  
 Score total : 0  
 Score for star read(s) : -1.3  
 Score for read counts : 0  
 Score for mfe : 1.2  
 Score for randfold : 0  
 Score for cons. seed :  
 Total read count : 36  
 Mature read count : 36  
 Loop read count : 0  
 Star read count : 0

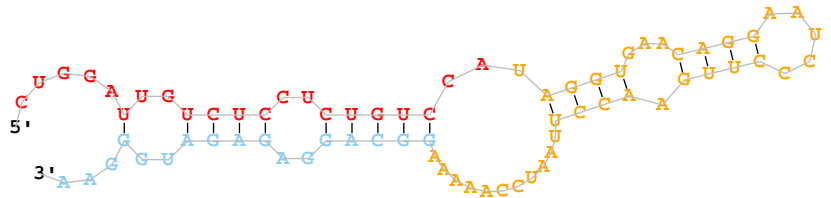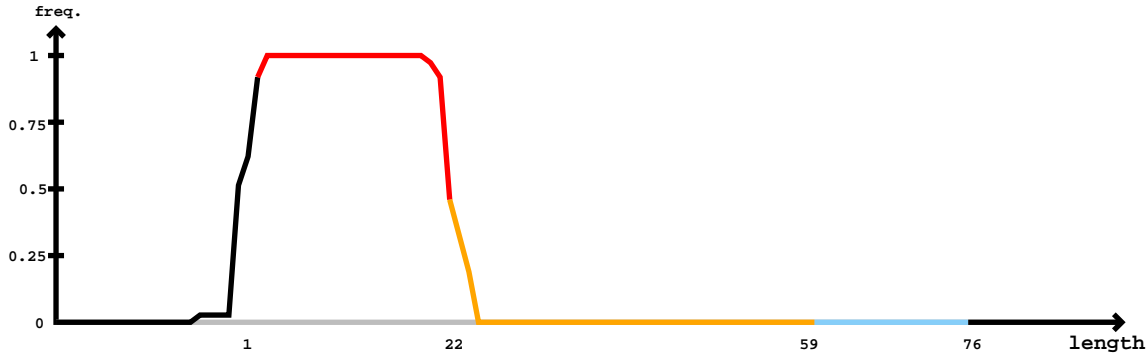

**Mature**

**Star**

| 5' -                                                                                                                   | reads | mm | sample |
|------------------------------------------------------------------------------------------------------------------------|-------|----|--------|
| ccaggguuuccccaagcuucuggauugucuccucugucca <u>uaggugaacaggaaucccuugaaccuuauuccaaaaaggcaggagagaugggaa</u> guuuuuggagacugu | 1     | 0  | S03    |
| .....aagcuucuggauugucuccucugu.....                                                                                     | 1     | 0  | S03    |
| .....uucuggauugucuccucuguc.....                                                                                        | 1     | 0  | S03    |
| .....uucuggauugucuccucugucc.....                                                                                       | 1     | 0  | S03    |
| .....uucuggauugucuccucuguccU.....                                                                                      | 1     | 1  | S03    |
| .....uucuggauugucuccucuguccauU.....                                                                                    | 1     | 1  | S03    |
| .....ucuggauugucuccucuguccaua.....                                                                                     | 1     | 0  | S03    |
| .....uggauugucuccucugucc.....                                                                                          | 1     | 0  | S03    |
| .....uucuggauugucuccucugucG.....                                                                                       | 1     | 1  | S04    |
| .....uucuggauugucuccucugucc.....                                                                                       | 5     | 0  | S04    |
| .....uucuggauugucuccucugucA.....                                                                                       | 1     | 1  | S04    |
| .....uucuggauugucuccucugucU.....                                                                                       | 3     | 1  | S04    |
| .....uucuggauugucuccucuguccC.....                                                                                      | 1     | 1  | S04    |
| .....uucuggauugucuccucuguccAA.....                                                                                     | 1     | 1  | S04    |
| .....uucuggauugucuccucuguccauU.....                                                                                    | 2     | 1  | S04    |
| .....ucuggauugucuccucugucc.....                                                                                        | 2     | 0  | S04    |
| .....ucuggauugucuccucuguccaua.....                                                                                     | 1     | 0  | S04    |
| .....cuggauugucuccucugucc.....                                                                                         | 3     | 0  | S04    |
| .....cuggauugucuccucugucca.....                                                                                        | 5     | 0  | S04    |
| .....cuggauugucuccCugucca.....                                                                                         | 1     | 1  | S04    |
| .....cuggauugucuccucuguccG.....                                                                                        | 1     | 1  | S04    |
| .....cuggauugucuccucuguccaua.....                                                                                      | 1     | 0  | S04    |
| .....uggaCugucuccucugucc.....                                                                                          | 1     | 1  | S04    |
| .....uggauugucuccucugucca.....                                                                                         | 1     | 0  | S04    |



Provisional ID : chrA03\_213863  
 Score total : 0  
 Score for star read(s) : -1.3  
 Score for read counts : 0  
 Score for mfe : 1.3  
 Score for randfold : 0  
 Score for cons. seed :  
 Total read count : 42  
 Mature read count : 41  
 Loop read count : 0  
 Star read count : 1

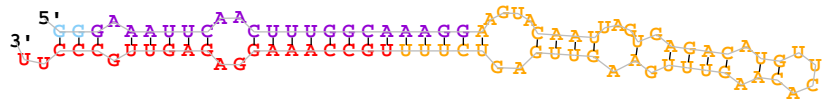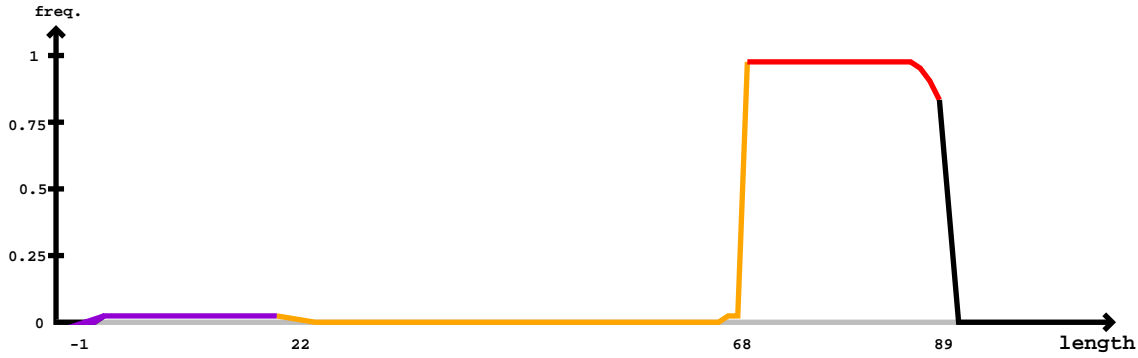

**Star**

**Mature**

| 5' - | Star                 | Mature                                             | -3'                | obs              | exp | reads | mm | sample |
|------|----------------------|----------------------------------------------------|--------------------|------------------|-----|-------|----|--------|
| agg  | aaauucaacuuggcaaagg  | aaguacaauuagugagacauguuacacaaguuugaaguugagucuuuugc | caaaggagaguugcccuu | uacuguucaucuuuug |     | 3     | 0  | S03    |
| agg  | aaauucaacuuggcaaagg  | aaguacaauuagugagacauguuacacaaguuugaaguugagucuuuugc | caaaggagaguugcccuu | uacuguucaucuuuug |     | 8     | 1  | S03    |
| ...  | Uaaauucaacuuggcaaagg | ...                                                | ...                | ...              |     | 1     | 1  | S04    |
| ...  | ...                  | uuugc                                              | aaaggagaguugcc     | ...              |     | 1     | 1  | S04    |
| ...  | ...                  | ugc                                                | caaaggagaguugcc    | ...              |     | 1     | 0  | S04    |
| ...  | ...                  | ugc                                                | caaaggagaguugcc    | ...              |     | 1     | 0  | S04    |
| ...  | ...                  | ugc                                                | caaaggagaguugccCu  | ...              |     | 1     | 1  | S04    |
| ...  | ...                  | ugc                                                | caaaggagaguugccuA  | ...              |     | 24    | 1  | S04    |
| ...  | ...                  | ugc                                                | caaaggagaguugccuu  | ...              |     | 2     | 0  | S04    |

Provisional ID : chrA03\_236012  
 Score total : 1.1  
 Score for star read(s) : 3.9  
 Score for read counts : -3.3  
 Score for mfe : 0.6  
 Score for randfold : 0  
 Score for cons. seed :  
 Total read count : 5  
 Mature read count : 4  
 Loop read count : 0  
 Star read count : 1

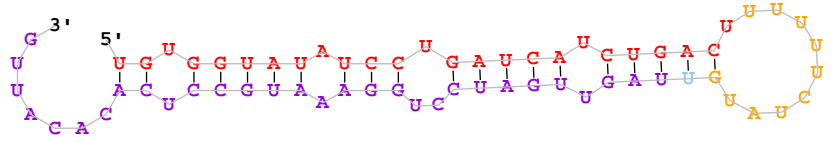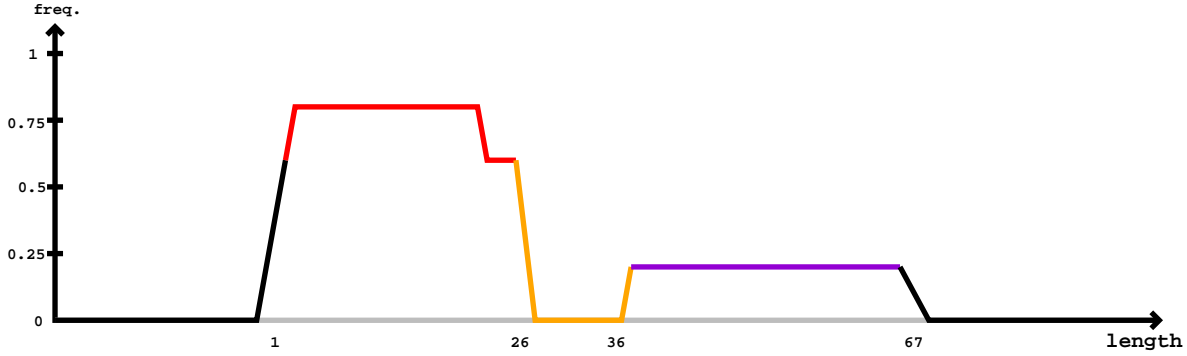

| <b>Mature</b> |                                                                                                                                                                  | <b>Star</b> |     |        |  |  |
|---------------|------------------------------------------------------------------------------------------------------------------------------------------------------------------|-------------|-----|--------|--|--|
| 5' -          | acugacgcaauauugauuaggu <u>ugugguaaua<u>uccg</u>aucaucugacu</u> uuuuu <u>ucaug</u> uuaguuga <u>uccg</u> gaaaug <u>ccuacac</u> auugaucauaaa <u>cuu</u> cagucuguguu | -3'         | obs |        |  |  |
|               | acugacgcaauauugauuaggu <u>ugugguaaua<u>uccg</u>aucaucugacu</u> uuuuu <u>ucaug</u> uuaguuga <u>uccg</u> gaaaug <u>ccuacac</u> auugaucauaaa <u>cuu</u> cagucuguguu |             | exp |        |  |  |
|               | .....(((.....(((.....(((.....(((.....(((.....(((.....(((.....(((.....(((.....(((.....(((.....))))))))))))))))))))))))))))))))))))))                              | reads       | mm  | sample |  |  |
|               | .....guugugguaaua <u>uccg</u> aucaucacu.....                                                                                                                     | 1           | 0   | S03    |  |  |
|               | .....uugugguaaua <u>uccg</u> aucaucugacu.....                                                                                                                    | 1           | 0   | S04    |  |  |
|               | .....ugugguaaua <u>uccg</u> aucaucugacu.....                                                                                                                     | 1           | 0   | S04    |  |  |
|               | .....gugguaaua <u>uccg</u> aucaucugacu.....                                                                                                                      | 1           | 0   | S04    |  |  |
|               | .....uaguuga <u>uccg</u> gaaaug <u>ccuacac</u> auug.....                                                                                                         | 1           | 0   | S04    |  |  |





Provisional ID : chrA03\_259226  
 Score total : 0.8  
 Score for star read(s) : -1.3  
 Score for read counts : 0  
 Score for mfe : 2.1  
 Score for randfold : 0  
 Score for cons. seed :  
 Total read count : 167  
 Mature read count : 162  
 Loop read count : 0  
 Star read count : 5

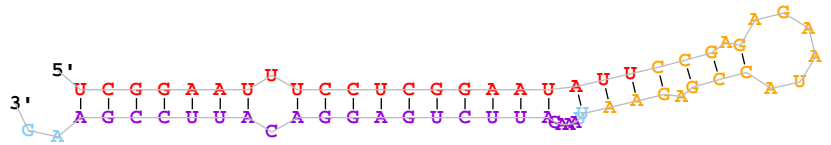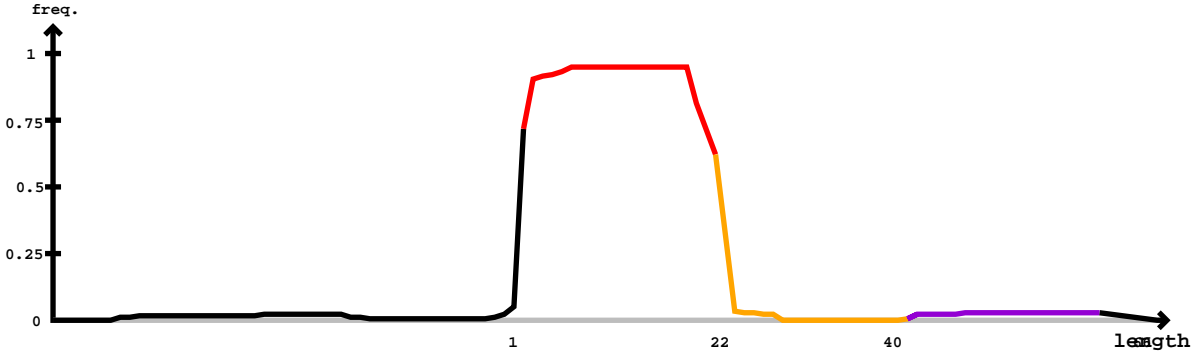

**Mature**

**Star**

```

5' - cgacgagaauuggucgucagaaaauucgucggaaaaaaaaauucucggaauuucccggaauuuccgagagaauuccgagaauuaagauucgaggacauuccgaaga -3'
cgacgagaauuggucgucagaaaauucgucggaaaaaaaaauucucggaauuucccggaauuuccgagagaauuccgagaauuaagauucgaggacauuccgaga
(((((((((((((.....)))))))))))).....(((((((((((.....)))))))))))).....))))))))))
.....aaauucgucggaaaaaaaau.....
.....cuucggCauuucccuggaau.....
.....uucggaauuucccuggaau.....
.....ucggaauuucccuggaau.....
.....ucggaauuucccuggaau.....
.....ucggaauuucccuggaauu.....
.....ucggaauuucccuggaauu.....
.....ucggaauuucccuggaauC.....
.....ucggaauuuccCcggaauuuc.....
.....cggaauuucccuggaau.....
.....cggaauuucccuggaau.....
.....cggaauuuccCcggaauu.....
.....cggaauuucccuggaauuC.....
.....cggaauuucccuggaauu.....
.....cggaauuucccuggaauuuc.....
.....ggauuucccuggaauu.....
.....gaauuucGucggaauuuccgaga.....
.....aaauucccuggaauuuccga.....
.....aaauucGucggaauuuccgaga.....
.....aaauucccuggaauuucc.....
.....aaagauucgaggacauuccga.....
.....agaauaggucgucagaaaauucucU.....
.....agaauaggucgucagaaaauucucg.....
.....aaCggucgucagaaaauucguc.....
.....ucAucggaauuucccuggaauu.....
.....cuucggaauuucccuggaau.....
.....uucggaauuucccuggaauu.....
.....uucggaauuucccuggaAau.....
.....Nucggaauuucccuggaauu.....
.....uucggaauuucccuggaauuC.....
.....ucggaauuucccuggaau.....
.....ucggaauuucccuggaau.....
.....ucggaauuucccuggaau.....
  
```

| reads | mm | sample |
|-------|----|--------|
| 1     | 0  | S03    |
| 1     | 1  | S03    |
| 1     | 0  | S03    |
| 11    | 0  | S03    |
| 4     | 0  | S03    |
| 4     | 0  | S03    |
| 34    | 0  | S03    |
| 3     | 1  | S03    |
| 1     | 1  | S03    |
| 4     | 0  | S03    |
| 2     | 0  | S03    |
| 1     | 1  | S03    |
| 2     | 1  | S03    |
| 12    | 0  | S03    |
| 1     | 0  | S03    |
| 2     | 0  | S03    |
| 1     | 1  | S03    |
| 1     | 0  | S03    |
| 1     | 1  | S03    |
| 1     | 0  | S03    |
| 3     | 0  | S03    |
| 1     | 1  | S04    |
| 1     | 0  | S04    |
| 1     | 1  | S04    |
| 2     | 1  | S04    |
| 1     | 0  | S04    |
| 1     | 0  | S04    |
| 1     | 1  | S04    |
| 1     | 1  | S04    |
| 1     | 1  | S04    |
| 11    | 0  | S04    |
| 7     | 0  | S04    |

Mature

Star

|                                                                                                                          |    |   |     |
|--------------------------------------------------------------------------------------------------------------------------|----|---|-----|
| cgacgagauggucgucagaaauucucgucggaauaaaaauucucggaauuuucccggaauuuucccggaauuuucccgagagaauucccgagaauuaagaaucugaggacauuccgaaga |    |   |     |
| .....ucggaauuuucccggaauu.....                                                                                            | 4  | 0 | S04 |
| .....ucggaauCucccggaauuu.....                                                                                            | 1  | 1 | S04 |
| .....ucggaauCucccggaauuu.....                                                                                            | 1  | 1 | S04 |
| .....ucggaauuuucccggaauuu.....                                                                                           | 32 | 0 | S04 |
| .....Ncggaauuuucccggaauuu.....                                                                                           | 1  | 1 | S04 |
| .....ucggaauuuucccggaauuC.....                                                                                           | 1  | 1 | S04 |
| .....ucggaauuuucccggaauuuc.....                                                                                          | 3  | 0 | S04 |
| .....cggaauuuucccggaaua.....                                                                                             | 2  | 0 | S04 |
| .....cggaauuuucccggaauu.....                                                                                             | 2  | 0 | S04 |
| .....cggaauuuucccggaauuu.....                                                                                            | 6  | 0 | S04 |
| .....cggaauuuucccggaauuuc.....                                                                                           | 1  | 0 | S04 |
| .....auuuucccggaauuuccgagU.....                                                                                          | 1  | 1 | S04 |
| .....auuuGucggaauuuccgaga.....                                                                                           | 1  | 1 | S04 |
| .....uaagaaucugaggacauuccgaG.....                                                                                        | 1  | 1 | S04 |
| .....uuAugaggacauuccgaa.....                                                                                             | 1  | 1 | S04 |

Provisional ID : chrA03\_260104  
 Score total : 0.3  
 Score for star read(s) : 3.9  
 Score for read counts : -4.9  
 Score for mfe : 1.4  
 Score for randfold : 0  
 Score for cons. seed :  
 Total read count : 2  
 Mature read count : 1  
 Loop read count : 0  
 Star read count : 1

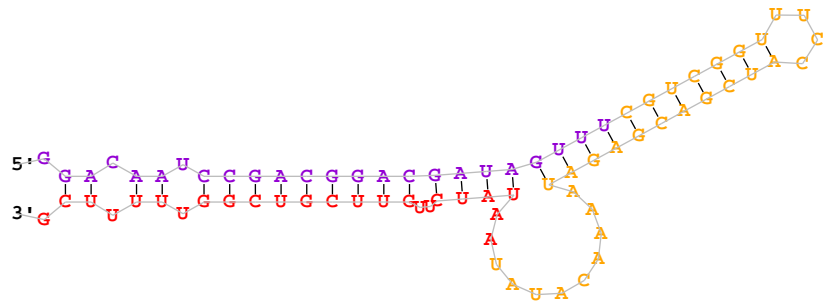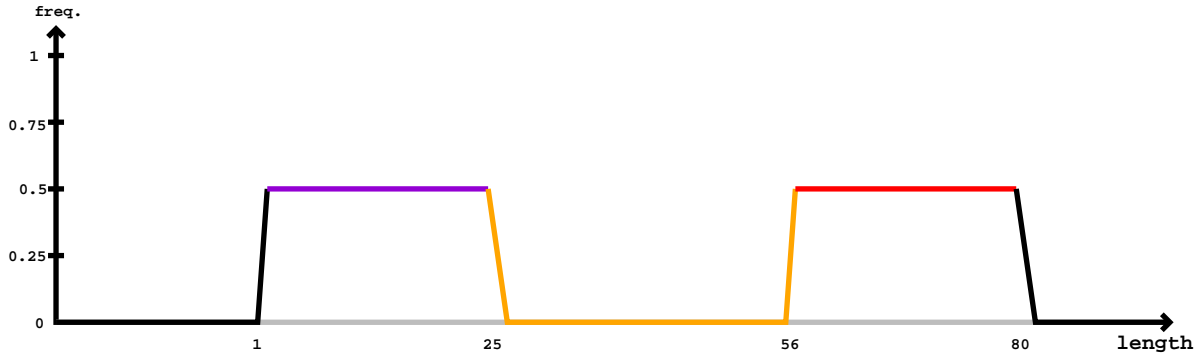

**Star**

**Mature**

|      |                                                                                        |                          |                                  |                                           |     |       |    |        |
|------|----------------------------------------------------------------------------------------|--------------------------|----------------------------------|-------------------------------------------|-----|-------|----|--------|
| 5' - | aaaacaugcuacauuccgaug                                                                  | ggacaauccgacggacgauaguuu | cgucgguuuccaucgacgagauaaaacauaau | aaauaucuuguucgucgguuuuucgucagaaaauuucugau | -3' | obs   |    |        |
|      | aaaacaugcuacauuccgaug                                                                  | ggacaauccgacggacgauaguuu | cgucgguuuccaucgacgagauaaaacauaau | aaauaucuuguucgucgguuuuucgucagaaaauuucugau |     | exp   |    |        |
|      | .....(((.((((.((((.((((.((((.((((.((((.((((.((((.(.....))))))))))))))))))))))))))..... |                          |                                  |                                           |     | reads | mm | sample |
|      | .....ggacaauccgacggacgauaguuu.....                                                     |                          |                                  |                                           |     | 1     | 0  | S04    |
|      | .....aaauaucuuguucgucgguuuuucg.....                                                    |                          |                                  |                                           |     | 1     | 0  | S04    |

Provisional ID : chrA03\_266631  
 Score total : 0.9  
 Score for star read(s) : -1.3  
 Score for read counts : 0  
 Score for mfe : 2.2  
 Score for randfold : 0  
 Score for cons. seed :  
 Total read count : 106  
 Mature read count : 106  
 Loop read count : 0  
 Star read count : 0

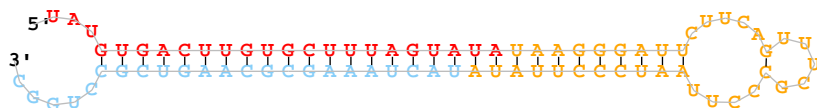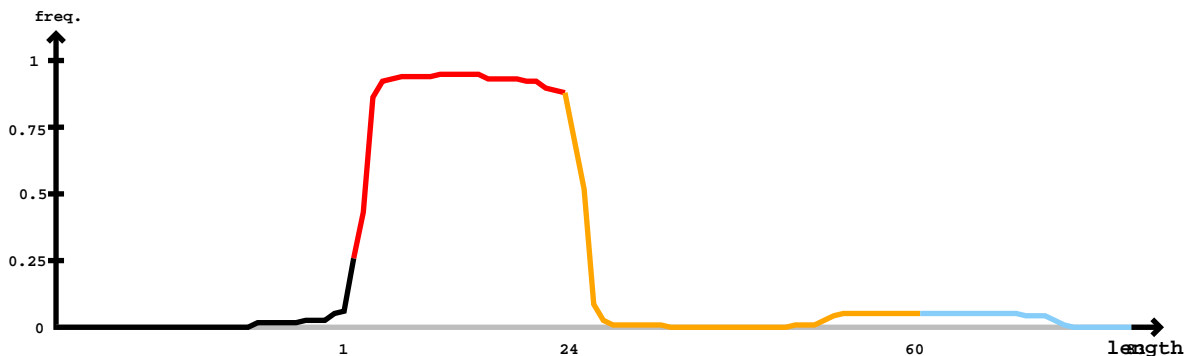

**Mature**

**Star**

| 5'                                                                                                                     | reads | mm | sample |
|------------------------------------------------------------------------------------------------------------------------|-------|----|--------|
| uaaaauccaauggcaaaauuugauuugu <u>uaugugacuugugcuuuaguauuaagggauuucucaguuucgccuuuaaucccuuauuaucuaaagcgcaagucgcuggcga</u> | 1     | 0  | S03    |
| uuugauuuguuaugugacuugugc.....                                                                                          | 1     | 1  | S03    |
| uuugauuuguuaugugacuugugU.....                                                                                          | 1     | 1  | S03    |
| guuaugugacuugugcuuaguauU.....                                                                                          | 1     | 1  | S03    |
| uuaguAacuugugcuuaguaua.....                                                                                            | 1     | 1  | S03    |
| uaugugacuugugcuuuaguaua.....                                                                                           | 3     | 0  | S03    |
| uaugugacuugugcuuCaguaua.....                                                                                           | 1     | 1  | S03    |
| uaugugacuugugcuuuaguCa.....                                                                                            | 2     | 1  | S03    |
| uaugugacuugugcuuuaguauau.....                                                                                          | 1     | 0  | S03    |
| augugacuugugcuuuaguaua.....                                                                                            | 1     | 0  | S03    |
| augugacuugugcuuuaguauau.....                                                                                           | 2     | 0  | S03    |
| augugacuugugcuuuaguauaua.....                                                                                          | 2     | 0  | S03    |
| augugacuuguaAcuuuaguauaua.....                                                                                         | 1     | 1  | S03    |
| ugugacuugugcuuuagu.....                                                                                                | 1     | 0  | S03    |
| ugugacuuguaAcuuuaguaua.....                                                                                            | 1     | 1  | S03    |
| ugugacuugugcuuuaguaua.....                                                                                             | 3     | 0  | S03    |
| ugugacuugugcuuuaguauau.....                                                                                            | 1     | 0  | S03    |
| ugugacuugugcuuuGguauaua.....                                                                                           | 1     | 1  | S03    |
| ugugacuuguaAcuuuaguauaua.....                                                                                          | 1     | 1  | S03    |
| ugugacuugugcuuuaguauauG.....                                                                                           | 1     | 1  | S03    |
| ugugacuugugcuuuaguauauU.....                                                                                           | 1     | 1  | S03    |
| ugugacuugugcuuuaguauaua.....                                                                                           | 13    | 0  | S03    |
| gugacuugugcuuuaguauau.....                                                                                             | 1     | 0  | S03    |
| gugacuugugcuuuaguauaua.....                                                                                            | 2     | 0  | S03    |
| gugacuugugcuuuaguauauaag.....                                                                                          | 1     | 0  | S03    |
| ugacuugugcuuuaguauaua.....                                                                                             | 1     | 0  | S03    |
| uuaucccuuauauacuuaaagcgc.....                                                                                          | 1     | 0  | S03    |
| aucccuuauuacuuaaagcgcaaA.....                                                                                          | 1     | 1  | S03    |
| aucccuuauuacuuaaagcgcaag.....                                                                                          | 1     | 0  | S03    |
| ucccuuauuacuuaaagcgcaagu.....                                                                                          | 1     | 0  | S03    |
| ucAcuuuauuacuuaaagcgcaagu.....                                                                                         | 1     | 1  | S03    |
| uuGguuauugugacuugugcuuua.....                                                                                          | 1     | 1  | S04    |
| guuaugugacuugugcuuuagu.....                                                                                            | 1     | 0  | S04    |
| guuaugugacuugugcuuuaguauau.....                                                                                        | 1     | 0  | S04    |

Mature

Star

|                                 |                            |                           |         |                           |    |   |     |
|---------------------------------|----------------------------|---------------------------|---------|---------------------------|----|---|-----|
| uaaaauccaaagcgcaaaauuuugauuuugu | uaugugacuugugcuuuaguaua    | uaagggauucucaguuucgcccuaa | ucccuua | uaucuaaagcgcaagucgcuggcga |    |   |     |
| .....                           | uaugugacuugugcuuuaguauG    | .....                     |         |                           | 1  | 1 | S04 |
| .....                           | uaugugacuugugcuuuaguaua    | .....                     |         |                           | 13 | 0 | S04 |
| .....                           | uaugugacuugugcuuuaguauau   | .....                     |         |                           | 1  | 0 | S04 |
| .....                           | uaugugacuugugcuuuaguauauaa | .....                     |         |                           | 1  | 1 | S04 |
| .....                           | augugacuugugcuuuagu        | .....                     |         |                           | 1  | 0 | S04 |
| .....                           | augugacuugugcuuuaguau      | .....                     |         |                           | 1  | 0 | S04 |
| .....                           | augugacuugugcuuuaguauau    | .....                     |         |                           | 1  | 0 | S04 |
| .....                           | augugacuugugcuuuaguauaua   | .....                     |         |                           | 9  | 0 | S04 |
| .....                           | augugacuugugcuuuaguauauG   | .....                     |         |                           | 1  | 1 | S04 |
| .....                           | augugacuugugcuuuaguauauaa  | .....                     |         |                           | 1  | 0 | S04 |
| .....                           | ugugacuugugcuuuaguaua      | .....                     |         |                           | 1  | 0 | S04 |
| .....                           | ugugacuugugcuuuaguauau     | .....                     |         |                           | 5  | 0 | S04 |
| .....                           | ugugacuugugcuuuaguauauG    | .....                     |         |                           | 1  | 1 | S04 |
| .....                           | ugugacuugugcuuuaguauauaa   | .....                     |         |                           | 1  | 1 | S04 |
| .....                           | ugugacuugugcuuuaguauaua    | .....                     |         |                           | 12 | 0 | S04 |
| .....                           | ugugacuugugcuuuaguauauCa   | .....                     |         |                           | 1  | 1 | S04 |
| .....                           | ugugacuugugcuuuaguauauG    | .....                     |         |                           | 1  | 1 | S04 |
| .....                           | ugugacuugugcuuuaguauauU    | .....                     |         |                           | 1  | 1 | S04 |
| .....                           | ugugacuugugcuuuaguauauaa   | .....                     |         |                           | 4  | 0 | S04 |
| .....                           | gugacuugugcuuuaguauaua     | .....                     |         |                           | 1  | 0 | S04 |
| .....                           | gugacuugugcuuuaguauauaaa   | .....                     |         |                           | 2  | 0 | S04 |
| .....                           | gacuugugcuuuaguaua         | .....                     |         |                           | 1  | 0 | S04 |
| .....                           | ugugcuuuaguauauaagggauuc   | .....                     |         |                           | 1  | 0 | S04 |
| .....                           | cccuauauacuaaagcgcaaguc    | .....                     |         |                           | 1  | 0 | S04 |



Provisional ID : chrA03\_275572  
 Score total : 44.5  
 Score for star read(s) : 3.9  
 Score for read counts : 53.7  
 Score for mfe : -13  
 Score for randfold : 0  
 Score for cons. seed :  
 Total read count : 117  
 Mature read count : 116  
 Loop read count : 0  
 Star read count : 1

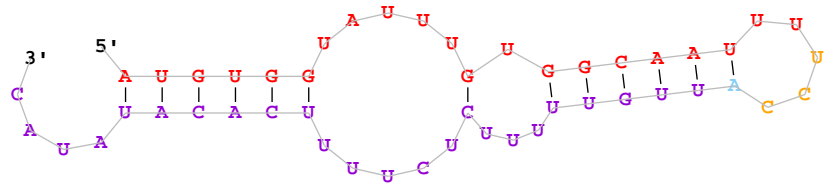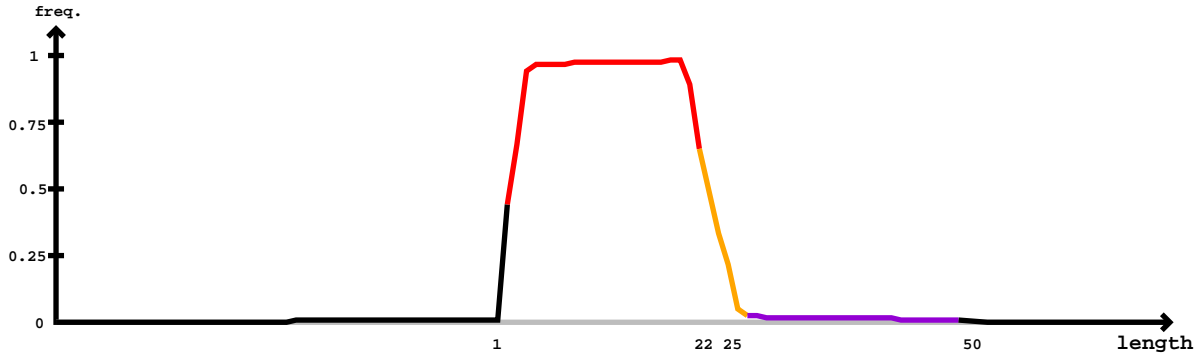

**Mature Star**

| 5' -                                                                  | obs | reads | mm | sample |
|-----------------------------------------------------------------------|-----|-------|----|--------|
| uaauccuuuguuaaaagugaugguaaaaguuauuaguguaaaacauaugugguauuuguggcauuuuc  | exp |       |    |        |
| uaauccuuuguuaaaagugaugguaaaaguuauuaguguaaaacauaugugguauuuguggcauuuucc |     | 1     | 1  | S03    |
| uaauccuuuguuaaaagugaugguaaaaguuauuaguguaaaacauaugugguauuuguggcauuuucc |     | 3     | 0  | S03    |
| uaauccuuuguuaaaagugaugguaaaaguuauuaguguaaaacauaugugguauuuguggcauuuucc |     | 5     | 0  | S03    |
| uaauccuuuguuaaaagugaugguaaaaguuauuaguguaaaacauaugugguauuuguggcauuuucc |     | 1     | 1  | S03    |
| uaauccuuuguuaaaagugaugguaaaaguuauuaguguaaaacauaugugguauuuguggcauuuucc |     | 9     | 0  | S03    |
| uaauccuuuguuaaaagugaugguaaaaguuauuaguguaaaacauaugugguauuuguggcauuuucc |     | 3     | 0  | S03    |
| uaauccuuuguuaaaagugaugguaaaaguuauuaguguaaaacauaugugguauuuguggcauuuucc |     | 2     | 0  | S03    |
| uaauccuuuguuaaaagugaugguaaaaguuauuaguguaaaacauaugugguauuuguggcauuuucc |     | 5     | 0  | S03    |
| uaauccuuuguuaaaagugaugguaaaaguuauuaguguaaaacauaugugguauuuguggcauuuucc |     | 4     | 0  | S03    |
| uaauccuuuguuaaaagugaugguaaaaguuauuaguguaaaacauaugugguauuuguggcauuuucc |     | 4     | 0  | S03    |
| uaauccuuuguuaaaagugaugguaaaaguuauuaguguaaaacauaugugguauuuguggcauuuucc |     | 3     | 0  | S03    |
| uaauccuuuguuaaaagugaugguaaaaguuauuaguguaaaacauaugugguauuuguggcauuuucc |     | 1     | 0  | S03    |
| uaauccuuuguuaaaagugaugguaaaaguuauuaguguaaaacauaugugguauuuguggcauuuucc |     | 1     | 1  | S03    |
| uaauccuuuguuaaaagugaugguaaaaguuauuaguguaaaacauaugugguauuuguggcauuuucc |     | 5     | 0  | S03    |
| uaauccuuuguuaaaagugaugguaaaaguuauuaguguaaaacauaugugguauuuguggcauuuucc |     | 1     | 1  | S03    |
| uaauccuuuguuaaaagugaugguaaaaguuauuaguguaaaacauaugugguauuuguggcauuuucc |     | 7     | 0  | S03    |
| uaauccuuuguuaaaagugaugguaaaaguuauuaguguaaaacauaugugguauuuguggcauuuucc |     | 4     | 0  | S03    |
| uaauccuuuguuaaaagugaugguaaaaguuauuaguguaaaacauaugugguauuuguggcauuuucc |     | 1     | 0  | S03    |
| uaauccuuuguuaaaagugaugguaaaaguuauuaguguaaaacauaugugguauuuguggcauuuucc |     | 3     | 1  | S03    |
| uaauccuuuguuaaaagugaugguaaaaguuauuaguguaaaacauaugugguauuuguggcauuuucc |     | 1     | 0  | S03    |
| uaauccuuuguuaaaagugaugguaaaaguuauuaguguaaaacauaugugguauuuguggcauuuucc |     | 2     | 0  | S03    |
| uaauccuuuguuaaaagugaugguaaaaguuauuaguguaaaacauaugugguauuuguggcauuuucc |     | 1     | 0  | S03    |
| uaauccuuuguuaaaagugaugguaaaaguuauuaguguaaaacauaugugguauuuguggcauuuucc |     | 1     | 0  | S03    |
| uaauccuuuguuaaaagugaugguaaaaguuauuaguguaaaacauaugugguauuuguggcauuuucc |     | 2     | 0  | S04    |
| uaauccuuuguuaaaagugaugguaaaaguuauuaguguaaaacauaugugguauuuguggcauuuucc |     | 2     | 0  | S04    |
| uaauccuuuguuaaaagugaugguaaaaguuauuaguguaaaacauaugugguauuuguggcauuuucc |     | 7     | 0  | S04    |
| uaauccuuuguuaaaagugaugguaaaaguuauuaguguaaaacauaugugguauuuguggcauuuucc |     | 4     | 0  | S04    |
| uaauccuuuguuaaaagugaugguaaaaguuauuaguguaaaacauaugugguauuuguggcauuuucc |     | 1     | 1  | S04    |
| uaauccuuuguuaaaagugaugguaaaaguuauuaguguaaaacauaugugguauuuguggcauuuucc |     | 1     | 1  | S04    |
| uaauccuuuguuaaaagugaugguaaaaguuauuaguguaaaacauaugugguauuuguggcauuuucc |     | 3     | 0  | S04    |
| uaauccuuuguuaaaagugaugguaaaaguuauuaguguaaaacauaugugguauuuguggcauuuucc |     | 4     | 0  | S04    |
| uaauccuuuguuaaaagugaugguaaaaguuauuaguguaaaacauaugugguauuuguggcauuuucc |     | 2     | 0  | S04    |



**Mature**                      **Star**

|                                                                                                                               |   |   |     |
|-------------------------------------------------------------------------------------------------------------------------------|---|---|-----|
| uuauccuuuuguuaaaagugagugguaaaaguuuuaguguaaacau <u>ugugguauuuuguggcauuuuucca</u> uuuguuuuuucuuuuucacauauacgaaauuuuuuuccuuuauuu |   |   |     |
| .....ugugguauuuuguggcauuu.....                                                                                                | 3 | 0 | S04 |
| .....ugugguauuuuguggcauuu.....                                                                                                | 1 | 0 | S04 |
| .....ugugguauuuuguggcauuuuuc.....                                                                                             | 1 | 0 | S04 |
| .....ugugguauuuuguggcauuuuucc.....                                                                                            | 2 | 0 | S04 |
| .....gugguauuuuguggcauuu.....                                                                                                 | 7 | 0 | S04 |
| .....gugguauuuuguggcauuu.....                                                                                                 | 3 | 0 | S04 |
| .....gugguauuuuguggcauuuuucc.....                                                                                             | 3 | 0 | S04 |
| .....gugg <u>aa</u> uuuuguggcauuuuucc.....                                                                                    | 1 | 1 | S04 |
| .....gugguauuuuguggcauuuuucca.....                                                                                            | 1 | 0 | S04 |
| .....ugguauuuuguggcauuuu.....                                                                                                 | 2 | 0 | S04 |
| .....auuuuguggcauuuuuccauu.....                                                                                               | 1 | 0 | S04 |
| .....uuguuuuuucuuuuucacauauac.....                                                                                            | 1 | 0 | S04 |





Provisional ID : chrA03\_284953  
 Score total : 0.3  
 Score for star read(s) : -1.3  
 Score for read counts : 0  
 Score for mfe : 1.6  
 Score for randfold : 0  
 Score for cons. seed :  
 Total read count : 163  
 Mature read count : 156  
 Loop read count : 0  
 Star read count : 7

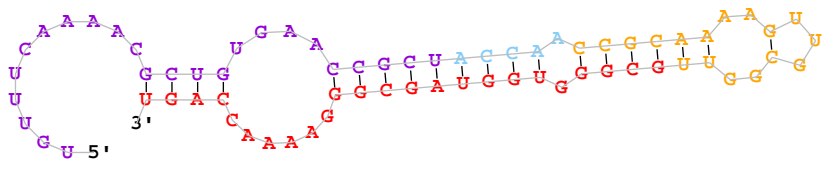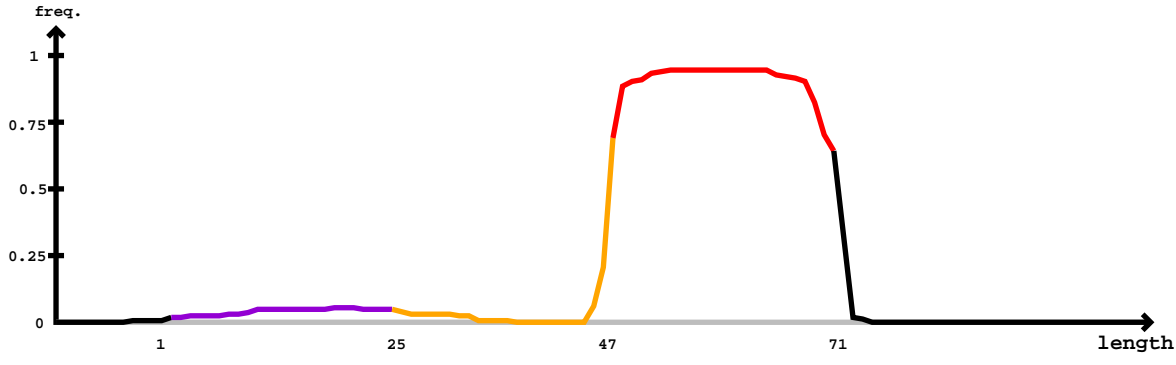

**Star**

**Mature**

| 5' -                | Star                                            | Mature                   | -3'                                          | obs                           | mm    | sample |
|---------------------|-------------------------------------------------|--------------------------|----------------------------------------------|-------------------------------|-------|--------|
|                     |                                                 |                          |                                              | reads                         |       |        |
| uuugugugauuuuucaaaa | cgucugugaaccgcu                                 | accaaccgcaaaa            | guugcgguuugcgggguuagcgggguuagcgggaaaaaccaguc | augcccaaaacugauuuuacugaaguaaa | 1     | S03    |
| uuugugugauuuuucaaaa | cgucugugaaccgcu                                 | accaaccgcaaaa            | guugcgguuugcgggguuagcgggguuagcgggaaaaaccaguc | augcccaaaacugauuuuacugaaguaaa | 1     | S03    |
| .....               | (((.....(((.....(((.....(((.....))))))))))..... | .....                    | .....                                        | .....                         | ..... | .....  |
| .....               | aaUgcugugaaccgcu                                | accaaccg.....            | .....                                        | 1                             | 1     | S03    |
| .....               | .....                                           | aaccgcuaccaaccgcaaa..... | .....                                        | 1                             | 0     | S03    |
| .....               | .....                                           | .....                    | uugcgggguuagcgggaa.....                      | 1                             | 0     | S03    |
| .....               | .....                                           | .....                    | uugcgggguuagcgggaaa.....                     | 1                             | 0     | S03    |
| .....               | .....                                           | .....                    | uugcgggguuagcgggaaaaac.....                  | 1                             | 0     | S03    |
| .....               | .....                                           | .....                    | uugcgggguuagcgggaaaaacc.....                 | 3                             | 0     | S03    |
| .....               | .....                                           | .....                    | ugcgggguuagcgggaa.....                       | 1                             | 0     | S03    |
| .....               | .....                                           | .....                    | ugcgggguuagcgggaaaU.....                     | 1                             | 1     | S03    |
| .....               | .....                                           | .....                    | ugcgggguuagcgggaaaaacc.....                  | 2                             | 0     | S03    |
| .....               | .....                                           | .....                    | ugcgggguuagcgggaaaaccU.....                  | 1                             | 1     | S03    |
| .....               | .....                                           | .....                    | ugcgggguuagcgggaaaGcca.....                  | 1                             | 1     | S03    |
| .....               | .....                                           | .....                    | ugcgggguuagcgggaaaaaccag.....                | 2                             | 0     | S03    |
| .....               | .....                                           | .....                    | Ngcgggguuagcgggaaaaaccag.....                | 1                             | 1     | S03    |
| .....               | .....                                           | .....                    | uCcgggguuagcgggaaaaaccaguc.....              | 1                             | 1     | S03    |
| .....               | .....                                           | .....                    | Ucgggguuagcgggaaaaacc.....                   | 1                             | 1     | S03    |
| .....               | .....                                           | .....                    | gcgggguuagcgggaaaaacc.....                   | 3                             | 0     | S03    |
| .....               | .....                                           | .....                    | gcgggguuagcgggaaaaacca.....                  | 4                             | 0     | S03    |
| .....               | .....                                           | .....                    | gcgggGguuagcgggaaaaaccagU.....               | 1                             | 1     | S03    |
| .....               | .....                                           | .....                    | gcgggguuagcgggaaaaaccagC.....                | 4                             | 1     | S03    |
| .....               | .....                                           | .....                    | gcgggguuagcgggaaaaaccagU.....                | 22                            | 0     | S03    |
| .....               | .....                                           | .....                    | gcgggguuagcgggaaaaaccagG.....                | 2                             | 1     | S03    |
| .....               | .....                                           | .....                    | gcgggguuagcgggaaaaaccagA.....                | 1                             | 1     | S03    |
| .....               | .....                                           | .....                    | gcgggguuagcgggaaaaaccagU.....                | 1                             | 1     | S03    |
| .....               | .....                                           | .....                    | cgggguuagcgggaaaaacca.....                   | 3                             | 0     | S03    |
| .....               | .....                                           | .....                    | cgggguuagcgggaaaaaccagC.....                 | 1                             | 1     | S03    |
| .....               | .....                                           | .....                    | cgggguuagcgggaaaaaccagU.....                 | 3                             | 0     | S03    |
| .....               | .....                                           | .....                    | cgggguuagcgggaaaaaccagU.....                 | 2                             | 1     | S03    |
| .....               | .....                                           | .....                    | cgggguuagcgggaaaaaccaguc.....                | 8                             | 0     | S03    |
| .....               | .....                                           | .....                    | gggguuagcgggaaaaaccagU.....                  | 2                             | 0     | S03    |
| .....               | .....                                           | .....                    | gugguagcgggaaaaaccagU.....                   | 1                             | 0     | S03    |
| .....               | .....                                           | .....                    | gugguagcgggaaaaaccaguc.....                  | 1                             | 0     | S03    |
| .....               | .....                                           | .....                    | gugguagcgggaaaaaccaguca.....                 | 1                             | 0     | S03    |
| .....               | .....                                           | .....                    | ugguagcgggaaaaaccagucau.....                 | 1                             | 0     | S03    |

Star

Mature

|                                                                                                                 |    |   |     |
|-----------------------------------------------------------------------------------------------------------------|----|---|-----|
| uuugugugauuguuucaaaccgugugaaccgcuaccaaccgcaaaaguugcggguugcgggugguagcgggaaaaaccagucaugccuaaacugauuuuacaugaaguaaa |    |   |     |
| ..... gguagcgggaaaaaccagu.....                                                                                  | 1  | 0 | S03 |
| ..... ugauuguuucaaaaUgcugugaac.....                                                                             | 1  | 1 | S04 |
| ..... uguuucaaaaacgugugaaccgcA.....                                                                             | 1  | 1 | S04 |
| ..... uguuucaaaaacgugugaaccgcu.....                                                                             | 1  | 0 | S04 |
| ..... uucaaaaacgugugaaccgcu.....                                                                                | 1  | 0 | S04 |
| ..... aaaaacgugugaaccgcuaccaac.....                                                                             | 1  | 0 | S04 |
| ..... acgugugaaccgcuaccaaccg.....                                                                               | 1  | 0 | S04 |
| ..... acgugugaaccgcuaccaaccA.....                                                                               | 1  | 1 | S04 |
| ..... uugcgggugguagcgggaa.....                                                                                  | 1  | 0 | S04 |
| ..... uugcgggugguagcgggaaaaacc.....                                                                             | 1  | 0 | S04 |
| ..... uugcgggugguagcgggaaGaacca.....                                                                            | 1  | 1 | S04 |
| ..... uugcgggugguagcgggaaaaacca.....                                                                            | 1  | 0 | S04 |
| ..... ugccgggugguagcgggaaaaac.....                                                                              | 1  | 0 | S04 |
| ..... ugccgggugguagcgggaaaaacca.....                                                                            | 1  | 0 | S04 |
| ..... ugccgggugguagcgggaaGaccag.....                                                                            | 1  | 1 | S04 |
| ..... ugccgggugguagcgggaaaaaccag.....                                                                           | 5  | 0 | S04 |
| ..... gccgggugguagcgggaaaGcc.....                                                                               | 1  | 1 | S04 |
| ..... gccgggugguagcgggaaaaacca.....                                                                             | 1  | 0 | S04 |
| ..... gccgggCgguagcgggaaaaacca.....                                                                             | 1  | 1 | S04 |
| ..... gccgggugguagcgggaaaaaccag.....                                                                            | 1  | 0 | S04 |
| ..... gccgggugguagcgggaaaaaccagC.....                                                                           | 4  | 1 | S04 |
| ..... gccgggCgguagcgggaaaaaccagu.....                                                                           | 1  | 1 | S04 |
| ..... gccgggugguagcgggaaaaaccagu.....                                                                           | 32 | 0 | S04 |
| ..... cgggugguagcgggaaaaacc.....                                                                                | 1  | 0 | S04 |
| ..... cgggugguagcgggaaaaacca.....                                                                               | 1  | 0 | S04 |
| ..... cgggugguagcgggaaaaaccagu.....                                                                             | 1  | 0 | S04 |
| ..... cgggugguagcgggaaaaaccaguU.....                                                                            | 2  | 1 | S04 |
| ..... cgggugguagcgggaaaaaccaguc.....                                                                            | 10 | 0 | S04 |
| ..... gggugguagcgggaaaaaccaguc.....                                                                             | 1  | 0 | S04 |
| ..... ggugguagcgggaaaaaccagucau.....                                                                            | 1  | 0 | S04 |
| ..... guugguagcgggaaaaaccaguc.....                                                                              | 1  | 0 | S04 |

Provisional ID : chrA03\_288587  
 Score total : 0.7  
 Score for star read(s) : -1.3  
 Score for read counts : 0  
 Score for mfe : 2  
 Score for randfold : 0  
 Score for cons. seed :  
 Total read count : 54  
 Mature read count : 14  
 Loop read count : 1  
 Star read count : 39

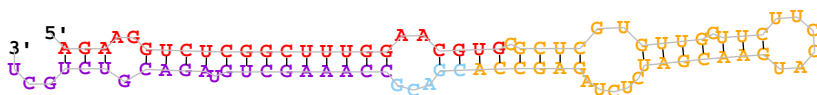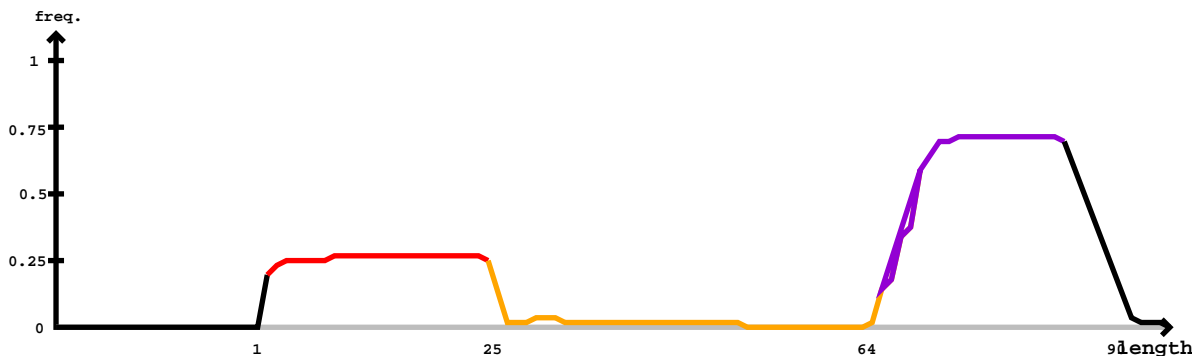

**Mature**

**Star**

| 5' -                                                                                                        | 3' - | obs | exp | reads | mm | sample |
|-------------------------------------------------------------------------------------------------------------|------|-----|-----|-------|----|--------|
| auuuaccagucaagaagguagaaggucucggcuuuggaacgugcgucugugucuuuccaagaacgaucucuagagccacgacgccaagcuguagacgucugcuuuau |      |     |     |       |    |        |
| .....(((((((.....(((((((((((((((.....)))))))))).....)))))))).....)))))))).....)))))))).....)))))))).....    |      |     |     |       |    |        |
| .....cgugugcuucuccaagaacU.....                                                                              |      | 1   | 1   | 1     | 0  | S03    |
| .....cgacgccaagcuguagacguU.....                                                                             |      | 1   | 1   | 1     | 0  | S03    |
| .....gacgccaagcuguagacA.....                                                                                |      | 1   | 1   | 1     | 0  | S03    |
| .....gacUccaagcuguagacgucugc.....                                                                           |      | 3   | 1   | 1     | 0  | S03    |
| .....gacgccaagcuguagacAucugc.....                                                                           |      | 1   | 1   | 1     | 0  | S03    |
| .....acgccaagcuguagacgucu.....                                                                              |      | 1   | 0   | 1     | 0  | S03    |
| .....cgccaagcuguagacAuc.....                                                                                |      | 1   | 1   | 1     | 0  | S03    |
| .....cgccaagcuguagacgucugc.....                                                                             |      | 1   | 0   | 1     | 0  | S03    |
| .....cUccaagcuguagacgucugc.....                                                                             |      | 4   | 1   | 1     | 0  | S03    |
| .....gccaagcuguagacAucugc.....                                                                              |      | 1   | 1   | 1     | 0  | S03    |
| .....ccaagcuguagacguU.....                                                                                  |      | 1   | 1   | 1     | 0  | S03    |
| .....ccaagcuguagacAucugcu.....                                                                              |      | 3   | 1   | 1     | 0  | S03    |
| .....ccaagcuguagacAucugcuuu.....                                                                            |      | 1   | 1   | 1     | 0  | S03    |
| .....ccaagcuguagacAucugcu.....                                                                              |      | 1   | 1   | 1     | 0  | S03    |
| .....aaagcuguagacAucugcu.....                                                                               |      | 3   | 1   | 1     | 0  | S03    |
| .....agcuguagacgucugcuuuau                                                                                  |      | 1   | 0   | 1     | 0  | S03    |
| .....agaaggucucggcuuuggaacgu.....                                                                           |      | 1   | 0   | 1     | 0  | S04    |
| .....agaaggucucggcuuuggaacgug.....                                                                          |      | 8   | 0   | 1     | 0  | S04    |
| .....Ngaaggucucggcuuuggaacgug.....                                                                          |      | 1   | 1   | 1     | 0  | S04    |
| .....agaGggucucggcuuuggaacgug.....                                                                          |      | 1   | 1   | 1     | 0  | S04    |
| .....gaaggucucggcuuuggaacgugc.....                                                                          |      | 2   | 0   | 1     | 0  | S04    |
| .....aaggucucggcuuuggaacgugU.....                                                                           |      | 1   | 1   | 1     | 0  | S04    |
| .....cucggcuuuggaacgugcgucgu.....                                                                           |      | 1   | 0   | 1     | 0  | S04    |
| .....gacUccaagcuguagacgucugc.....                                                                           |      | 2   | 1   | 1     | 0  | S04    |
| .....acgccaagcuguagacgucugcu.....                                                                           |      | 1   | 0   | 1     | 0  | S04    |
| .....cUccaagcuguagacgucu.....                                                                               |      | 1   | 1   | 1     | 0  | S04    |
| .....cgccaagcuguagacAucugc.....                                                                             |      | 2   | 1   | 1     | 0  | S04    |
| .....gccaagcuguagacAucugc.....                                                                              |      | 1   | 1   | 1     | 0  | S04    |
| .....ccaagcuguagacCucugc.....                                                                               |      | 1   | 1   | 1     | 0  | S04    |
| .....ccaagcuguagacAucugcu.....                                                                              |      | 6   | 1   | 1     | 0  | S04    |
| .....ccaagcuguagacAucugcu.....                                                                              |      | 2   | 1   | 1     | 0  | S04    |

Provisional ID : chrA03\_308665  
 Score total : 0.6  
 Score for star read(s) : 3.9  
 Score for read counts : -4.4  
 Score for mfe : 1.1  
 Score for randfold : 0  
 Score for cons. seed :  
 Total read count : 3  
 Mature read count : 1  
 Loop read count : 0  
 Star read count : 2

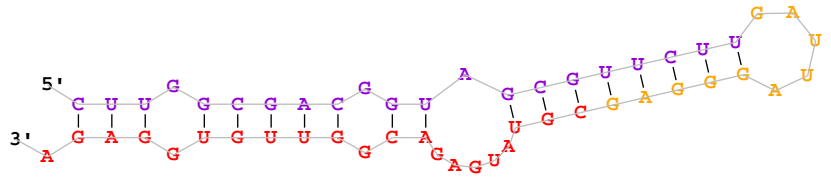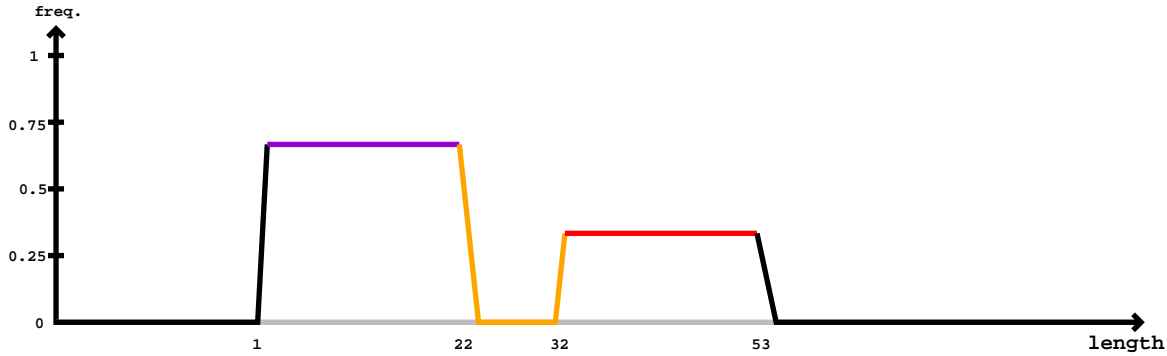

Star

Mature

| 5' -                            |                       | -3'                                                                      | obs | exp | reads | mm | sample |
|---------------------------------|-----------------------|--------------------------------------------------------------------------|-----|-----|-------|----|--------|
| acguaccucgaaggaggcgac           | cuuggcgacgguagcguucuu | gauuagggagcguaugagacgguugggagagagagguguugccugccgaugguuuugagacagagcuug    | 1   | 0   | 1     | 0  | S03    |
| acguaccucgaaggaggcgac           | uuggcgacgguagcguu     | cuugauuagggagcguaugagacgguugggagagagagguguugccugccgaugguuuugagacagagcuug | 1   | 0   | 1     | 0  | S04    |
| .....((((.....)))               | .....((((.....)))     | .....((((.....)))                                                        | 1   | 0   | 1     | 0  | S04    |
| .....cuuggcgacgguagcguucuu..... | .....                 | .....                                                                    | 1   | 0   | 1     | 0  | S04    |
| .....                           | .....                 | .....                                                                    | 1   | 0   | 1     | 0  | S04    |

Provisional ID : chrA03\_314063  
 Score total : 94.3  
 Score for star read(s) : 3.9  
 Score for read counts : 102.1  
 Score for mfe : -11.6  
 Score for randfold : 0  
 Score for cons. seed :  
 Total read count : 212  
 Mature read count : 211  
 Loop read count : 0  
 Star read count : 1

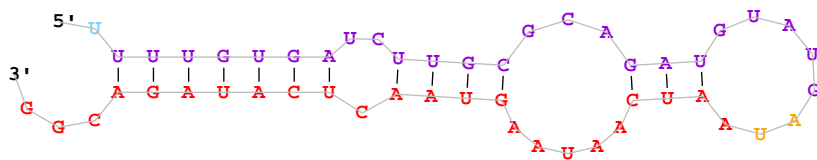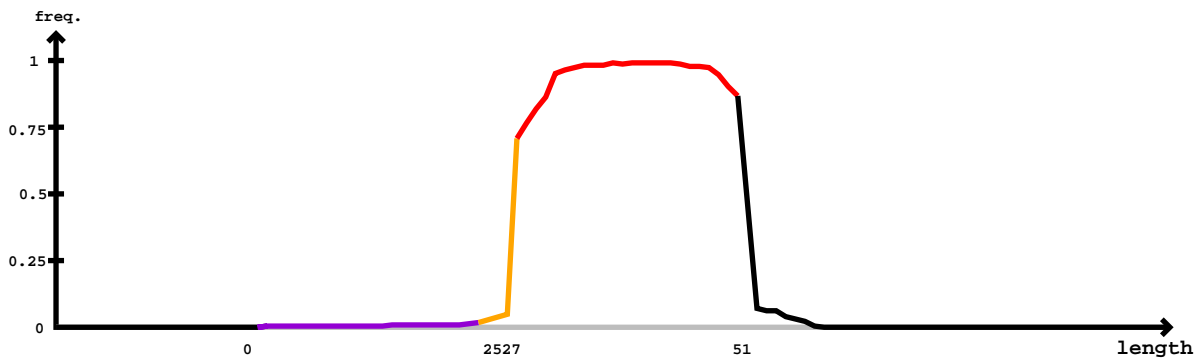

Star Mature

| 5' - | Star            | Mature | -3' | obs             | exp   | reads | mm | sample |
|------|-----------------|--------|-----|-----------------|-------|-------|----|--------|
| g    | uuuugugaucuugcg | caagu  | g   | uuuugugaucuugcg | caagu | 1     | 0  | S03    |
| g    | uuuugugaucuugcg | caagu  | g   | uuuugugaucuugcg | caagu | 1     | 0  | S03    |
| g    | uuuugugaucuugcg | caagu  | g   | uuuugugaucuugcg | caagu | 2     | 0  | S03    |
| g    | uuuugugaucuugcg | caagu  | g   | uuuugugaucuugcg | caagu | 1     | 0  | S03    |
| g    | uuuugugaucuugcg | caagu  | g   | uuuugugaucuugcg | caagu | 1     | 0  | S03    |
| g    | uuuugugaucuugcg | caagu  | g   | uuuugugaucuugcg | caagu | 1     | 0  | S03    |
| g    | uuuugugaucuugcg | caagu  | g   | uuuugugaucuugcg | caagu | 1     | 0  | S03    |
| g    | uuuugugaucuugcg | caagu  | g   | uuuugugaucuugcg | caagu | 3     | 0  | S03    |
| g    | uuuugugaucuugcg | caagu  | g   | uuuugugaucuugcg | caagu | 1     | 0  | S03    |
| g    | uuuugugaucuugcg | caagu  | g   | uuuugugaucuugcg | caagu | 1     | 1  | S03    |
| g    | uuuugugaucuugcg | caagu  | g   | uuuugugaucuugcg | caagu | 1     | 1  | S03    |
| g    | uuuugugaucuugcg | caagu  | g   | uuuugugaucuugcg | caagu | 2     | 1  | S03    |
| g    | uuuugugaucuugcg | caagu  | g   | uuuugugaucuugcg | caagu | 2     | 1  | S03    |
| g    | uuuugugaucuugcg | caagu  | g   | uuuugugaucuugcg | caagu | 59    | 0  | S03    |
| g    | uuuugugaucuugcg | caagu  | g   | uuuugugaucuugcg | caagu | 1     | 1  | S03    |
| g    | uuuugugaucuugcg | caagu  | g   | uuuugugaucuugcg | caagu | 1     | 1  | S03    |
| g    | uuuugugaucuugcg | caagu  | g   | uuuugugaucuugcg | caagu | 1     | 1  | S03    |
| g    | uuuugugaucuugcg | caagu  | g   | uuuugugaucuugcg | caagu | 2     | 0  | S03    |
| g    | uuuugugaucuugcg | caagu  | g   | uuuugugaucuugcg | caagu | 3     | 0  | S03    |
| g    | uuuugugaucuugcg | caagu  | g   | uuuugugaucuugcg | caagu | 1     | 1  | S03    |
| g    | uuuugugaucuugcg | caagu  | g   | uuuugugaucuugcg | caagu | 3     | 0  | S03    |
| g    | uuuugugaucuugcg | caagu  | g   | uuuugugaucuugcg | caagu | 1     | 1  | S03    |
| g    | uuuugugaucuugcg | caagu  | g   | uuuugugaucuugcg | caagu | 6     | 0  | S03    |
| g    | uuuugugaucuugcg | caagu  | g   | uuuugugaucuugcg | caagu | 1     | 1  | S03    |
| g    | uuuugugaucuugcg | caagu  | g   | uuuugugaucuugcg | caagu | 1     | 0  | S03    |
| g    | uuuugugaucuugcg | caagu  | g   | uuuugugaucuugcg | caagu | 1     | 0  | S03    |
| g    | uuuugugaucuugcg | caagu  | g   | uuuugugaucuugcg | caagu | 2     | 0  | S03    |
| g    | uuuugugaucuugcg | caagu  | g   | uuuugugaucuugcg | caagu | 1     | 0  | S03    |
| g    | uuuugugaucuugcg | caagu  | g   | uuuugugaucuugcg | caagu | 1     | 1  | S03    |
| g    | uuuugugaucuugcg | caagu  | g   | uuuugugaucuugcg | caagu | 10    | 0  | S03    |
| g    | uuuugugaucuugcg | caagu  | g   | uuuugugaucuugcg | caagu | 1     | 0  | S03    |
| g    | uuuugugaucuugcg | caagu  | g   | uuuugugaucuugcg | caagu | 1     | 1  | S03    |



Star

Mature

| Sequence                               | Star | Mature | Category |
|----------------------------------------|------|--------|----------|
| .....aauaagAACcCauagacgggaac.....      | 1    | 1      | S03      |
| .....aauaagAACcCauagacCggaac.....      | 1    | 1      | S03      |
| .....aauaagAACcCauagacgg.....          | 1    | 0      | S03      |
| .....aauaagAACcCauagacgggaaca.....     | 1    | 0      | S03      |
| .....uaagAACcCauagacgggaacac.....      | 2    | 0      | S03      |
| .....aagAACcCauagacgggaacacu.....      | 2    | 0      | S03      |
| .....acucauagUcgggaacacua.....         | 1    | 1      | S03      |
| .....uuugugaucuugcgcagauaug.....       | 1    | 0      | S04      |
| .....gGagauugauugauaaucauaagu.....     | 1    | 1      | S04      |
| .....gauaaucauaagAACcCauaga.....       | 1    | 0      | S04      |
| .....aauaaucauaagAACcCauagac.....      | 1    | 0      | S04      |
| .....uaucuaaagAACcCau.....             | 2    | 0      | S04      |
| .....aaucauaaagAACcCau.....            | 1    | 0      | S04      |
| .....aaucaGuaagAACcCauaga.....         | 1    | 1      | S04      |
| .....aaucauaaagAACcCauagac.....        | 1    | 0      | S04      |
| .....aaucauaaagAACcCauagacg.....       | 1    | 0      | S04      |
| .....aaucauaaagAACcCauagacGC.....      | 1    | 1      | S04      |
| .....aaCcauaaagAACcCauagacgg.....      | 1    | 1      | S04      |
| .....NaucauaaagAACcCauagacgg.....      | 1    | 1      | S04      |
| .....aaucauaaagAACcCauagacCg.....      | 1    | 1      | S04      |
| .....aaucauaaagAACcCauagacgg.....      | 1    | 1      | S04      |
| .....aaucauaaagAACcCauagacgg.....      | 60   | 0      | S04      |
| .....aaucauaaagAACcCauagacgg.....      | 1    | 1      | S04      |
| .....aaGcauaaagAACcCauagacgg.....      | 1    | 1      | S04      |
| .....aaucaGuaagAACcCauagacgg.....      | 3    | 1      | S04      |
| .....aaucauaaagAACcCauagacUg.....      | 1    | 1      | S04      |
| .....aucauaaagAACcCauagacg.....        | 1    | 0      | S04      |
| .....aucauaaagAACcCauagacgg.....       | 2    | 0      | S04      |
| .....aucauaaagAACcCauagacggg.....      | 1    | 0      | S04      |
| .....ucauaaagAACcCauagacgg.....        | 4    | 0      | S04      |
| .....ucauaaagAACcCauagacggga.....      | 1    | 0      | S04      |
| .....cauaaagAACcCauagacgg.....         | 3    | 0      | S04      |
| .....cauaaagAACcCauagacggU.....        | 1    | 1      | S04      |
| .....aauaagAACcCauagacGC.....          | 1    | 1      | S04      |
| .....aauaagAACcCauagacgg.....          | 2    | 0      | S04      |
| .....aauaagAACcCauagacgggaac.....      | 1    | 0      | S04      |
| .....aauaagAACcCauagacgggaaca.....     | 1    | 1      | S04      |
| .....uaacuaagAACcCauagacgggaacacu..... | 2    | 0      | S04      |



Mature

Star

|                                 |                        |                   |           |                   |                 |       |    |   |     |
|---------------------------------|------------------------|-------------------|-----------|-------------------|-----------------|-------|----|---|-----|
| uauuuggcggcugguugcccgguaaaaugaa | aaauuuccgagga          | aaauuccgacggcaacu | uaauaucuu | cggaauucccgguaugu | ucauuauuccgagga | aaaaa | 1  | 1 | S03 |
| .....                           | .....                  | .....             | .....     | cggaauucccgguaugC | .....           | ..... | 1  | 1 | S03 |
| .....                           | .....                  | .....             | .....     | cggaauucccgguaugG | .....           | ..... | 1  | 1 | S03 |
| .....                           | .....                  | .....             | .....     | cggaauucccgguaugu | .....           | ..... | 1  | 0 | S03 |
| .....                           | uuugcccgguaaaaugaaaaC  | .....             | .....     | .....             | .....           | ..... | 1  | 1 | S04 |
| .....                           | uuugcccgguaaaaugaaaau  | .....             | .....     | .....             | .....           | ..... | 1  | 0 | S04 |
| .....                           | guuGaaugaaaaauuccgagga | .....             | .....     | .....             | .....           | ..... | 1  | 1 | S04 |
| .....                           | uaaaugaaaaauuccgagga   | .....             | .....     | .....             | .....           | ..... | 1  | 0 | S04 |
| .....                           | aaugaaaaauuccgaggaCu   | .....             | .....     | .....             | .....           | ..... | 1  | 1 | S04 |
| .....                           | augaaaaauuccgaggaauucc | .....             | .....     | .....             | .....           | ..... | 1  | 0 | S04 |
| .....                           | ugaaaaauuccgaggaauuccg | .....             | .....     | .....             | .....           | ..... | 1  | 0 | S04 |
| .....                           | gaaaaauuccgaggaauuccga | .....             | .....     | .....             | .....           | ..... | 5  | 0 | S04 |
| .....                           | gaaaaauuccgaggaauuccCa | .....             | .....     | .....             | .....           | ..... | 1  | 1 | S04 |
| .....                           | aaaaauuccgGggaauuccgac | .....             | .....     | .....             | .....           | ..... | 1  | 1 | S04 |
| .....                           | aaaaauuccgaggaauuccgac | .....             | .....     | .....             | .....           | ..... | 7  | 0 | S04 |
| .....                           | aaauuccgaggaauuccga    | .....             | .....     | .....             | .....           | ..... | 3  | 0 | S04 |
| .....                           | aaauuccgaggaauuccgac   | .....             | .....     | .....             | .....           | ..... | 3  | 0 | S04 |
| .....                           | aaauuccgaggaauucc      | .....             | .....     | .....             | .....           | ..... | 1  | 0 | S04 |
| .....                           | aaauuccgaggaauuccga    | .....             | .....     | .....             | .....           | ..... | 7  | 0 | S04 |
| .....                           | aaauuccgUggaauuccga    | .....             | .....     | .....             | .....           | ..... | 1  | 1 | S04 |
| .....                           | aaauuccgaggaauuccgU    | .....             | .....     | .....             | .....           | ..... | 1  | 1 | S04 |
| .....                           | aaauuccgaggaauuccgac   | .....             | .....     | .....             | .....           | ..... | 24 | 0 | S04 |
| .....                           | aaauuccgaggaauuccAac   | .....             | .....     | .....             | .....           | ..... | 7  | 1 | S04 |
| .....                           | aaauuccgaggaauuccAacg  | .....             | .....     | .....             | .....           | ..... | 1  | 1 | S04 |
| .....                           | aaauuccgaggaauuccgacg  | .....             | .....     | .....             | .....           | ..... | 3  | 0 | S04 |
| .....                           | aaauuccgaggaauuccAacgg | .....             | .....     | .....             | .....           | ..... | 1  | 1 | S04 |
| .....                           | aaauuccgaggaauuccg     | .....             | .....     | .....             | .....           | ..... | 2  | 0 | S04 |
| .....                           | aaauuccgaggaauuccga    | .....             | .....     | .....             | .....           | ..... | 5  | 0 | S04 |
| .....                           | aaauuccgaggaauuccgac   | .....             | .....     | .....             | .....           | ..... | 5  | 0 | S04 |
| .....                           | aaauuccgaggaauuccgacg  | .....             | .....     | .....             | .....           | ..... | 2  | 0 | S04 |
| .....                           | auuccgaggaauuccga      | .....             | .....     | .....             | .....           | ..... | 1  | 0 | S04 |
| .....                           | auuccgaggaauuccgac     | .....             | .....     | .....             | .....           | ..... | 1  | 0 | S04 |
| .....                           | auuccgaggaauuccgacC    | .....             | .....     | .....             | .....           | ..... | 1  | 1 | S04 |
| .....                           | auuccgaggaauuccgacU    | .....             | .....     | .....             | .....           | ..... | 1  | 1 | S04 |
| .....                           | auuccgaggaauuccgac     | .....             | .....     | .....             | .....           | ..... | 1  | 0 | S04 |
| .....                           | auuccgaggaauuccgacg    | .....             | .....     | .....             | .....           | ..... | 2  | 0 | S04 |
| .....                           | uuccgaggaauuccgac      | .....             | .....     | .....             | .....           | ..... | 1  | 0 | S04 |
| .....                           | uuccgaggaauuccgacg     | .....             | .....     | .....             | .....           | ..... | 1  | 0 | S04 |
| .....                           | uccgaggaauuccgacg      | .....             | .....     | .....             | .....           | ..... | 1  | 0 | S04 |
| .....                           | cgaggaauuccgaAggc      | .....             | .....     | .....             | .....           | ..... | 1  | 1 | S04 |
| .....                           | cgaggaauuccgacggc      | .....             | .....     | .....             | .....           | ..... | 1  | 1 | S04 |
| .....                           | cgaggaauuccgacggc      | .....             | .....     | .....             | .....           | ..... | 1  | 0 | S04 |
| .....                           | ucggaaAuucccgguaug     | .....             | .....     | .....             | .....           | ..... | 1  | 1 | S04 |
| .....                           | ucggaaauucccgguaugu    | .....             | .....     | .....             | .....           | ..... | 1  | 0 | S04 |
| .....                           | cggaauucccgguaug       | .....             | .....     | .....             | .....           | ..... | 1  | 0 | S04 |
| .....                           | cggaauucccgguaugu      | .....             | .....     | .....             | .....           | ..... | 1  | 0 | S04 |
| .....                           | ggaauucccgguaugu       | .....             | .....     | .....             | .....           | ..... | 1  | 0 | S04 |
| .....                           | aaauucccgguaugu        | .....             | .....     | .....             | .....           | ..... | 1  | 0 | S04 |

Provisional ID : chrA03\_random\_2692801  
 Score total : 0  
 Score for star read(s) : -1.3  
 Score for read counts : -0.3  
 Score for mfe : 1.6  
 Score for randfold : 0  
 Score for cons. seed :  
 Total read count : 11  
 Mature read count : 11  
 Loop read count : 0  
 Star read count : 0

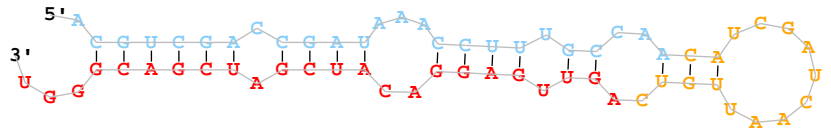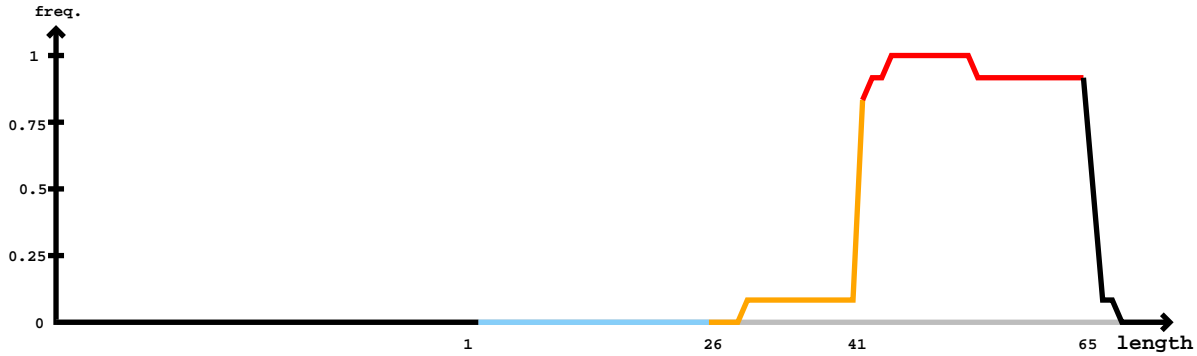

**Star** **Mature**

| 5' -                                                                                                                                                                                                                              | -3' | exp | reads | mm | sample |
|-----------------------------------------------------------------------------------------------------------------------------------------------------------------------------------------------------------------------------------|-----|-----|-------|----|--------|
| g u a u g c a g a c a a c g a g a g a g u g u c g a u c g a u g g g c u a g u a a g a c g u c g a c c g a u a a a c c u u g c c a a c a u c g a u c a a u u g u c a g u u g a g g a c a u c g a u c g a c g g g u u c u a g c c a |     |     |       |    |        |
| .....((((((.....))))).((((((.....((((((.....((((((.....))))))))))))))))))                                                                                                                                                         |     |     |       |    |        |
| .....c g a u c a a u u g u c a g u g a g g a c a u .....                                                                                                                                                                          |     |     | 1     | 0  | S03    |
| .....a g u u g a g g a c a u c g a u c g a c g g g C.....                                                                                                                                                                         |     |     | 3     | 1  | S03    |
| .....a g u u g a g g a c a u c g a u c g a c g g g G.....                                                                                                                                                                         |     |     | 1     | 1  | S03    |
| .....u g a g g a c a u c g a u c g a c g g g u u c A.....                                                                                                                                                                         |     |     | 1     | 1  | S03    |
| .....a g u u g a g g a c a u c g a u c g a c g g g A.....                                                                                                                                                                         |     |     | 1     | 1  | S04    |
| .....a g u u g a g g a c a u c g a u c g a c g U g u.....                                                                                                                                                                         |     |     | 2     | 1  | S04    |
| .....a g u u g a g g a c a u c g a u c g a c g A g u.....                                                                                                                                                                         |     |     | 2     | 1  | S04    |
| .....g u u g a g g a c a u c g a u c g a c g g g u C.....                                                                                                                                                                         |     |     | 1     | 1  | S04    |

Provisional ID : chrA03\_random\_2694764  
 Score total : 0.8  
 Score for star read(s) : 3.9  
 Score for read counts : -3.9  
 Score for mfe : 0.8  
 Score for randfold : 0  
 Score for cons. seed :  
 Total read count : 4  
 Mature read count : 3  
 Loop read count : 0  
 Star read count : 1

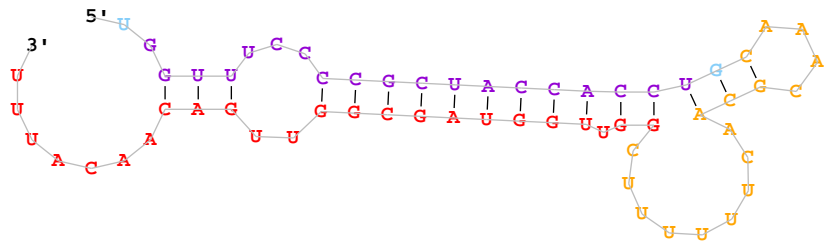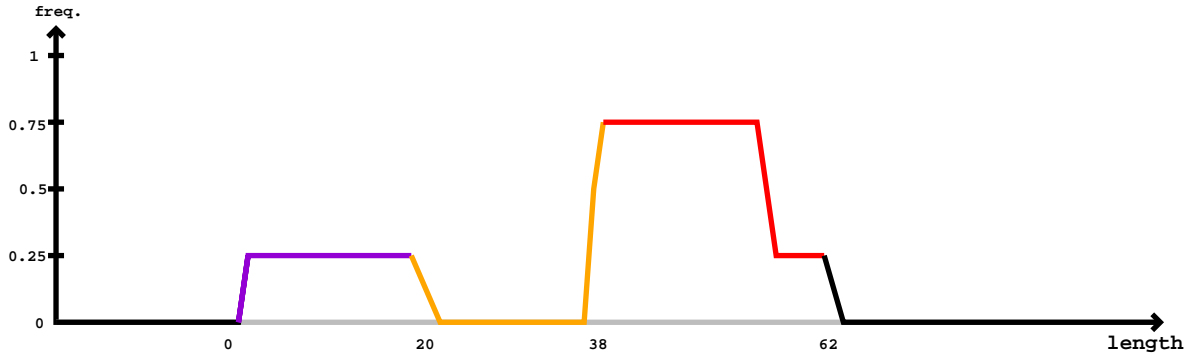

**Star**

**Mature**

5' - **acuaauaggucugacugguuucccgcuaccacug****caaacgcaacuuuuu****cgguugguagcggguugacaacaauu****caaaucacuauaaaucgcuucaaaccaaucugaa** -3'

acuaauaggucugac**ugguuucccgcuaccacug****caaacgcaacuuuuu****cgguugguagcggguugacaacaauu****caaaucacuauaaaucgcuucaaaccaaucugaa**

| reads | mm | sample |
|-------|----|--------|
| 1     | 1  | S03    |
| 1     | 0  | S03    |
| 1     | 0  | S03    |
| 1     | 1  | S03    |

exp





Provisional ID : chrA03\_random\_2698515  
 Score total : 1.9  
 Score for star read(s) : 3.9  
 Score for read counts : -3.9  
 Score for mfe : 2  
 Score for randfold : 0  
 Score for cons. seed :  
 Total read count : 4  
 Mature read count : 3  
 Loop read count : 0  
 Star read count : 1

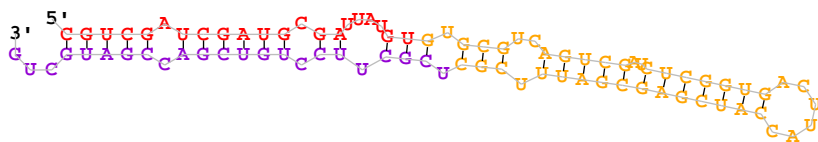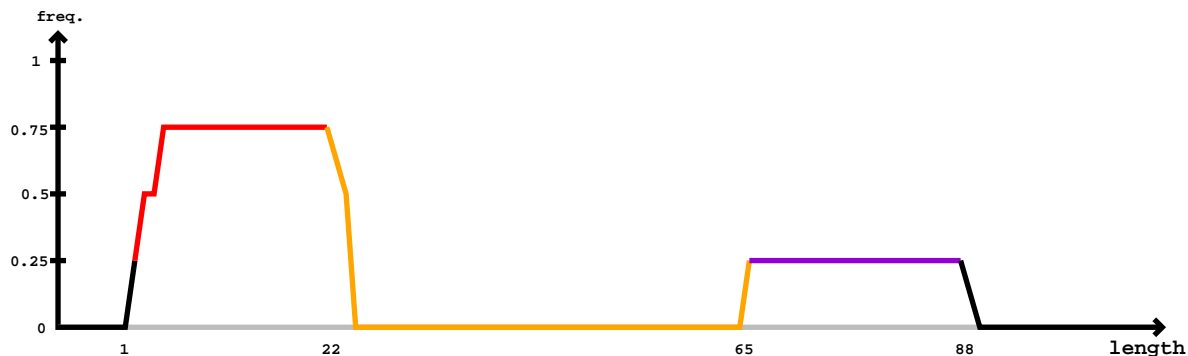

**Mature**

**Star**

| 5' -                                                                                                              | 3' -                                                                                                              | obs | exp | reads | mm | sample |
|-------------------------------------------------------------------------------------------------------------------|-------------------------------------------------------------------------------------------------------------------|-----|-----|-------|----|--------|
| acucggcgucgaucgaugcgauuaugugugcgcgucagucgauucggugacuuaaccaucgagcgauuucgucgcuccugucgaccgaugcugauaucuggugcugagcugcg | acucggcgucgaucgaugcgauuaugugugcgcgucagucgauucggugacuuaaccaucgagcgauuucgucgcuccugucgaccgaugcugauaucuggugcugagcugcg |     |     | 1     | 0  | S03    |
| .....cgucgaucgaugcgauuaugu.....                                                                                   | .....gucgaucgaugcgauuaugugu.....                                                                                  |     |     | 1     | 0  | S03    |
| .....cgaucgaugcgauuaugugu.....                                                                                    | .....ucgcuccugucgaccgaugcug.....                                                                                  |     |     | 1     | 0  | S04    |



Provisional ID : chrA03\_random\_2706162  
 Score total : 0  
 Score for star read(s) : -1.3  
 Score for read counts : 0  
 Score for mfe : 1.2  
 Score for randfold : 0  
 Score for cons. seed :  
 Total read count : 20  
 Mature read count : 20  
 Loop read count : 0  
 Star read count : 0

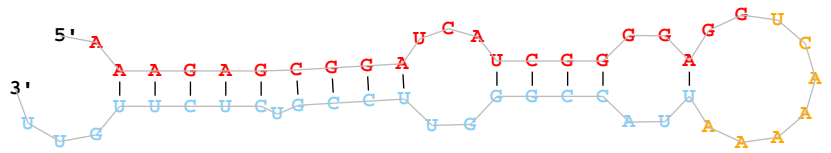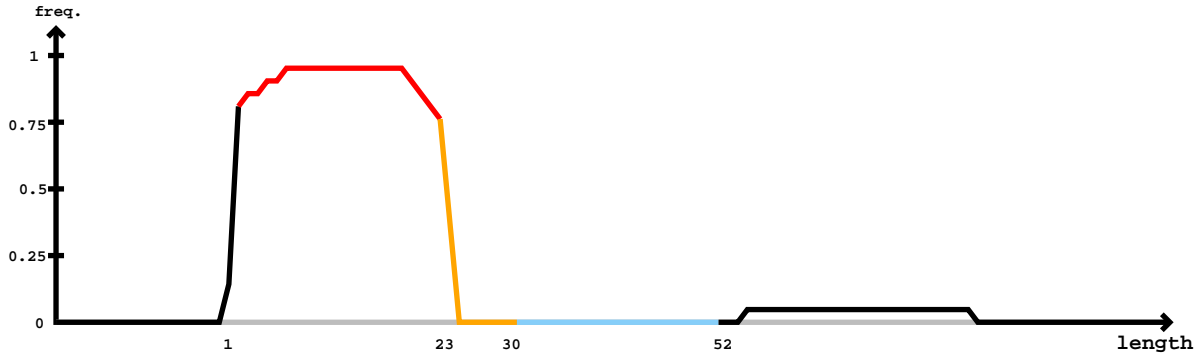

**Mature** **Star**

| 5' -                                                                                                                          | reads | exp | mm | sample |
|-------------------------------------------------------------------------------------------------------------------------------|-------|-----|----|--------|
| uccucgagccaaaucuu <b>aaagagcgggaucaucggggaggucaaaaauuaccggguuccgucucuuuguu</b> auaacuguggcucggcuuuugcggcaagugguaagugcagauuggc | 1     | 1   | 1  | S03    |
| .....Aaaagagcgggaucaucggggaggu.....                                                                                           | 1     | 0   | 0  | S03    |
| .....uaaagagcgggaucaucggggaggu.....                                                                                           | 1     | 0   | 0  | S03    |
| .....aaagagcgggaucaucggg.....                                                                                                 | 1     | 0   | 0  | S03    |
| .....aaagagcgggaucaucgggga.....                                                                                               | 1     | 0   | 0  | S03    |
| .....aaagagcgggaucacCggggag.....                                                                                              | 1     | 1   | 1  | S03    |
| .....aaagagcgggaucaucggggagg.....                                                                                             | 7     | 0   | 0  | S03    |
| .....aaagagcgggaucaucggggagU.....                                                                                             | 2     | 1   | 1  | S03    |
| .....aagagcgggaucaucggggaggu.....                                                                                             | 1     | 0   | 0  | S03    |
| .....gagcgggaucaucggggaggA.....                                                                                               | 1     | 1   | 1  | S03    |
| .....uaaagagcgggaucaucggggaggA.....                                                                                           | 1     | 1   | 1  | S04    |
| .....aaagagcgggaucaucggggagg.....                                                                                             | 1     | 0   | 0  | S04    |
| .....gcgggaucaucggggaggu.....                                                                                                 | 1     | 0   | 0  | S04    |
| .....aacuguggcucggcuuuugcggca.....                                                                                            | 1     | 0   | 0  | S04    |

Provisional ID : chrA03\_random\_2706548  
 Score total : 0.2  
 Score for star read(s) : 3.9  
 Score for read counts : -2.8  
 Score for mfe : -0.7  
 Score for randfold : 0  
 Score for cons. seed :  
 Total read count : 6  
 Mature read count : 5  
 Loop read count : 0  
 Star read count : 1

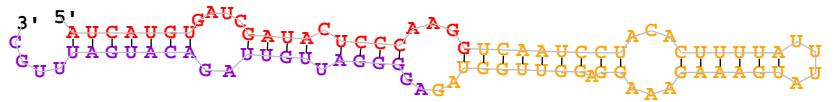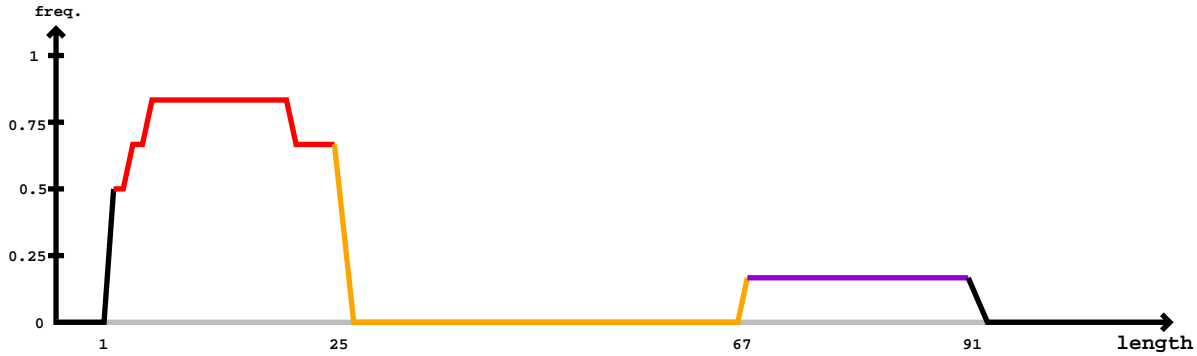

**Mature**

**Star**

| 5' -                                                                                        | 3'                   | obs | exp | reads | mm | sample |
|---------------------------------------------------------------------------------------------|----------------------|-----|-----|-------|----|--------|
| uugcaucaugugaucgauacucccaaggucaauccuacacuuuuuuuugaagaaggaggguugguagagggggauguuagacaugauuugc | aaaguuguugacuaggugaa | 1   | 0   | S03   |    |        |
| uugcaucaugugaucgauacucccaaggucaauccuacacuuuuuuuugaagaaggaggguugguagagggggauguuagacaugauuugc | aaaguuguugacuaggugaa | 1   | 0   | S03   |    |        |
| .....aucaugugaucgauacucc.....                                                               |                      | 1   | 0   | S03   |    |        |
| .....aucaugugaucgauacucccaagg.....                                                          |                      | 1   | 0   | S03   |    |        |
| .....caugugaucgauacucccaaggu.....                                                           |                      | 1   | 0   | S03   |    |        |
| .....ugugaucgaCacucccaaggu.....                                                             |                      | 1   | 1   | S03   |    |        |
| .....aucaugugaucgauacucccaagg.....                                                          |                      | 1   | 0   | S04   |    |        |
| .....aggggauguuagacaugauuugc.....                                                           |                      | 1   | 0   | S04   |    |        |

Provisional ID : chrA04\_355424  
 Score total : 8.4  
 Score for star read(s) : 3.9  
 Score for read counts : 3.2  
 Score for mfe : 1.3  
 Score for randfold : 0  
 Score for cons. seed :  
 Total read count : 18  
 Mature read count : 10  
 Loop read count : 0  
 Star read count : 8

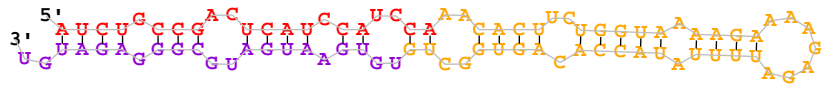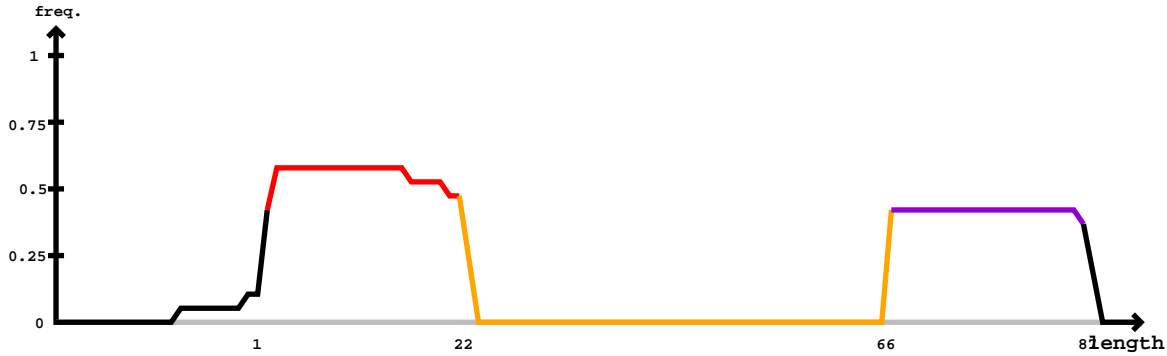

**Mature**

**Star**

| 5' -                                                                         | reads | obs | mm | sample |
|------------------------------------------------------------------------------|-------|-----|----|--------|
| aacaagaagagggguagaaac                                                        | 1     | 0   | 0  | S03    |
| aacaagaagagggguagaaac                                                        | 1     | 1   | 1  | S03    |
| .....(((.....(((.....(((.....(((.....(((.....(((.....))))))))))))))))))..... | 1     | 0   | 0  | S03    |
| .....acaucugccgacucauccauc.....                                              | 1     | 0   | 0  | S03    |
| .....aucugccgacucauccaucG.....                                               | 1     | 1   | 1  | S03    |
| .....aucugccgacucauccaucca.....                                              | 1     | 0   | 0  | S03    |
| .....aucugccgacucauccaucC.....                                               | 1     | 1   | 1  | S03    |
| .....ugugaaugaugcgggagaugu.....                                              | 2     | 0   | 0  | S03    |
| .....gguagaaacaucugcAgacucauc.....                                           | 1     | 1   | 1  | S04    |
| .....aucugccgacucauccaucca.....                                              | 3     | 0   | 0  | S04    |
| .....ucugccgacucauccaucca.....                                               | 1     | 0   | 0  | S04    |
| .....ucugccgacucauccauccaC.....                                              | 1     | 1   | 1  | S04    |
| .....ucugccgacucauccauccaU.....                                              | 1     | 1   | 1  | S04    |
| .....ugugaaugaugcgggagauA.....                                               | 1     | 1   | 1  | S04    |
| .....ugugaaugaugcgggagaugC.....                                              | 1     | 1   | 1  | S04    |
| .....ugugaaugaugcgggagaugu.....                                              | 2     | 0   | 0  | S04    |
| .....ugCgaaugaugcgggagaugu.....                                              | 1     | 1   | 1  | S04    |
| .....ugugaaugaugcgggagauguu.....                                             | 1     | 0   | 0  | S04    |



Provisional ID : chrA04\_366478  
 Score total : 1.1  
 Score for star read(s) : -1.3  
 Score for read counts : 0  
 Score for mfe : 2.4  
 Score for randfold : 0  
 Score for cons. seed :  
 Total read count : 213  
 Mature read count : 209  
 Loop read count : 0  
 Star read count : 4

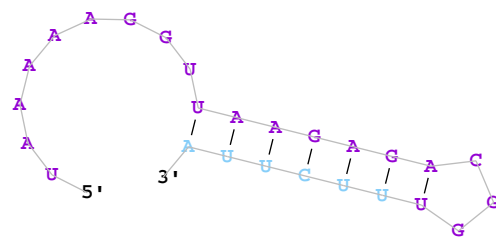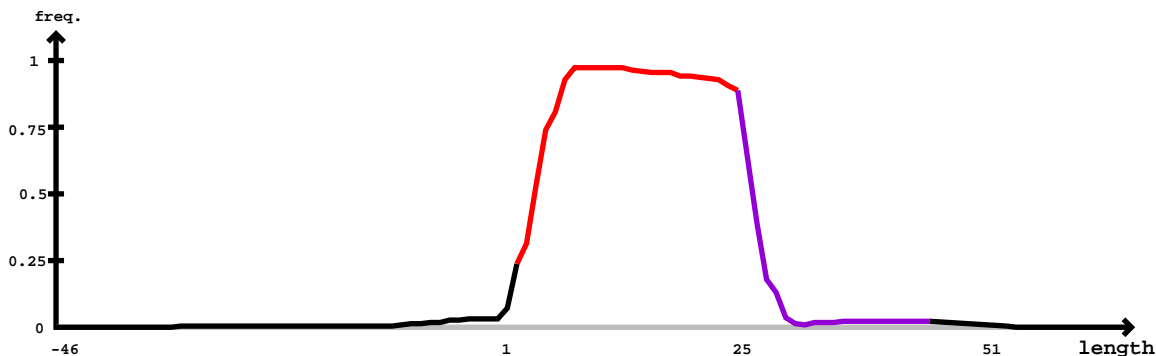

**Mature** **Star**

| 5'                                           | obs | reads | mm | sample |
|----------------------------------------------|-----|-------|----|--------|
| acucucagaacaugaccggugagguggaguuuuuacggaauuaa | exp |       |    |        |
| acucucagaacaugaccggugagguggaguuuuuacggaauuaa |     | 1     | 0  | S03    |
| .....cggaauuaagaaccgucucu.....               |     | 1     | 1  | S03    |
| .....auuaagaaccgucucuGaacuu.....             |     | 1     | 0  | S03    |
| .....aagaaccgucucuuaacuu.....                |     | 2     | 0  | S03    |
| .....aagaaccgucucuuaacuuua.....              |     | 2     | 1  | S03    |
| .....agaaGccgucucuuaacuuuaac.....            |     | 14    | 0  | S03    |
| .....agaaccgucucuuaacuuuaacu.....            |     | 1     | 0  | S03    |
| .....gaaaccgucucuGaacuuuaacu.....            |     | 1     | 0  | S03    |
| .....gaaaccgucucuuaacuuuaacu.....            |     | 4     | 1  | S03    |
| .....gaaaccgucucuuaacuuuaacG.....            |     | 1     | 0  | S03    |
| .....aaaccgucucuuaacuuuaacu.....             |     | 3     | 0  | S03    |
| .....aaaccgucucuuaacuuuaacu.....             |     | 13    | 0  | S03    |
| .....aaaccgucucuGaacuuuaacu.....             |     | 1     | 0  | S03    |
| .....aaaccgucucuuaacuuuaacua.....            |     | 9     | 0  | S03    |
| .....aaccgucucuuaacuuuaacu.....              |     | 6     | 0  | S03    |
| .....aaccgucucuuaacuuuaacu.....              |     | 3     | 0  | S03    |
| .....aaccgucucuuaacuuuaacua.....             |     | 8     | 1  | S03    |
| .....aaccgucucuuaacuuuaacuG.....             |     | 1     | 1  | S03    |
| .....aaccgucucuuaacuuuaGcua.....             |     | 1     | 1  | S03    |
| .....aaccgucucuAaacuuuaacua.....             |     | 1     | 1  | S03    |
| .....aaccgucucuUaacuuuaacuaa.....            |     | 1     | 0  | S03    |
| .....aaccgucucuAaacuuuaacuaa.....            |     | 1     | 1  | S03    |
| .....accgucucuuaacuuuaacuaaa.....            |     | 4     | 0  | S03    |
| .....ccgucucuuaacuuuaacu.....                |     | 2     | 0  | S03    |
| .....ccgucucuuaacuuuaacu.....                |     | 4     | 0  | S03    |
| .....ccgucucuuaacuuuaacua.....               |     | 1     | 0  | S03    |
| .....ccgucucuuaacuuuaacuaaaa.....            |     | 5     | 0  | S03    |
| .....ccgucucuuaacuuuaacuaaaa.....            |     | 3     | 0  | S03    |
| .....ccgucucuAaacuuuaacuaaaa.....            |     | 1     | 1  | S03    |
| .....cgucucuuaacuuuaacua.....                |     | 1     | 0  | S03    |





Provisional ID : chrA05\_400527  
 Score total : 0  
 Score for star read(s) : -1.3  
 Score for read counts : 0  
 Score for mfe : 1.2  
 Score for randfold : 0  
 Score for cons. seed :  
 Total read count : 110  
 Mature read count : 110  
 Loop read count : 0  
 Star read count : 0

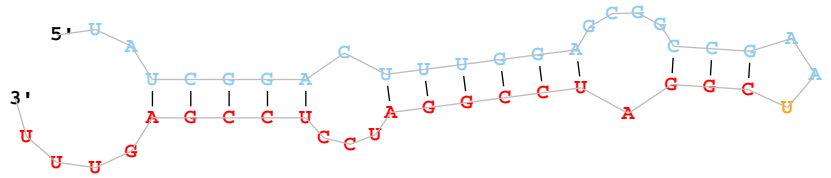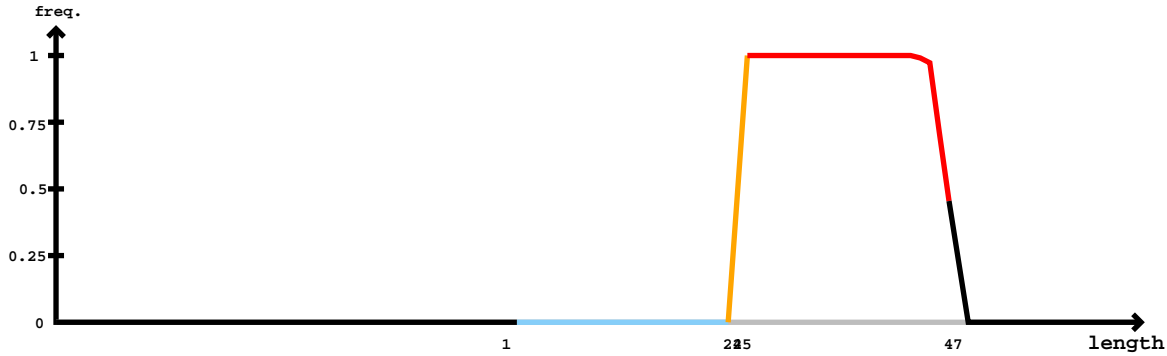

Star
Mature

| 5' -                                                                                                                                                  | -3' | exp | reads | mm | sample |
|-------------------------------------------------------------------------------------------------------------------------------------------------------|-----|-----|-------|----|--------|
| ggccucgaacucgagcuccaccuucucacccggcaaaacaacgggu <u>u</u> aucggacuuggagcggccgaa <u>u</u> cggauc <u>cg</u> gauc <u>cc</u> gaguuucgaguuucggauguccaugaggug |     |     |       |    |        |
| (((((.....)))).....(((.....(((.....(((.....(((.....(((.....(((.....(((.....(((.....))))))))))))))))))))))                                             |     |     |       |    |        |
| .....ucggauc <u>cg</u> gauc <u>cc</u> gaguuucgag.....                                                                                                 |     |     | 1     | 1  | S03    |
| .....ucggauc <u>cg</u> gauc <u>cc</u> gaguuucgaguu.....                                                                                               |     |     | 9     | 1  | S03    |
| .....ucggauc <u>cg</u> gauc <u>cc</u> gaguuucgaguu.....                                                                                               |     |     | 4     | 1  | S03    |
| .....ucggauc <u>cg</u> gauc <u>cc</u> gaguuucgaguuu.....                                                                                              |     |     | 6     | 1  | S03    |
| .....cggauc <u>cg</u> gauc <u>cc</u> gaguuucgaguu.....                                                                                                |     |     | 13    | 1  | S03    |
| .....cggauc <u>cg</u> gauc <u>cc</u> gaguuucgaguu.....                                                                                                |     |     | 10    | 1  | S03    |
| .....cggauc <u>cg</u> gauc <u>cc</u> gaguuucgaguuu.....                                                                                               |     |     | 20    | 1  | S03    |
| .....cggauc <u>cg</u> gauc <u>cc</u> gaguuucgaguuuc.....                                                                                              |     |     | 2     | 1  | S03    |
| .....ucggauc <u>cg</u> gauc <u>cc</u> gaguuucgaguu.....                                                                                               |     |     | 5     | 1  | S04    |
| .....ucggauc <u>cg</u> gauc <u>cc</u> gaguuucgaguu.....                                                                                               |     |     | 7     | 1  | S04    |
| .....ucggauc <u>cg</u> gauc <u>cc</u> gaguuucgaguuu.....                                                                                              |     |     | 7     | 1  | S04    |
| .....cggauc <u>cg</u> gauc <u>cc</u> gaguuucgag.....                                                                                                  |     |     | 1     | 1  | S04    |
| .....cggauc <u>cg</u> gauc <u>cc</u> gaguuucgag.....                                                                                                  |     |     | 1     | 1  | S04    |
| .....cggauc <u>cg</u> gauc <u>cc</u> gaguuucgaguu.....                                                                                                |     |     | 2     | 1  | S04    |
| .....cggauc <u>cg</u> gauc <u>cc</u> gaguuucgaguu.....                                                                                                |     |     | 6     | 1  | S04    |
| .....cggauc <u>cg</u> gauc <u>cc</u> gaguuucgaguu.....                                                                                                |     |     | 1     | 0  | S04    |
| .....cggauc <u>cg</u> gauc <u>cc</u> gaguuucgaguuu.....                                                                                               |     |     | 15    | 1  | S04    |



Provisional ID : chrA05\_400558  
 Score total : 4.8  
 Score for star read(s) : 3.9  
 Score for read counts : -0.3  
 Score for mfe : 1.3  
 Score for randfold : 0  
 Score for cons. seed :  
 Total read count : 11  
 Mature read count : 8  
 Loop read count : 0  
 Star read count : 3

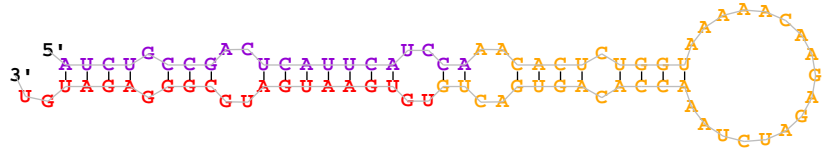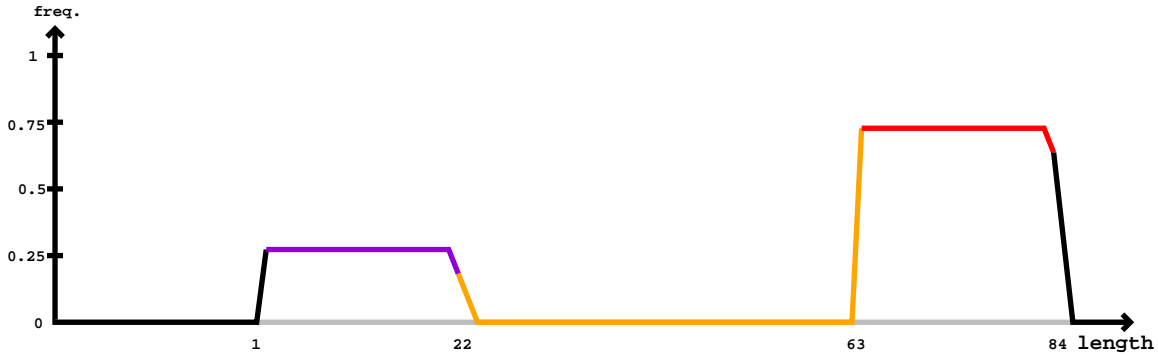

**Star**

**Mature**

```

5' - uagaacaagaggguaagaaaucugcgcgacucauuccaucaaaacacucugguaaaaaacaagagaucuaaaacacagugacugugugaaugaugcgggagauuuuucgu -3'
uagaacaagaggguaagaaaucugcgcgacucauuccaucaaaacacucugguaaaaaacaagagaucuaaaacacagugacugugugaaugaugcgggagauuuuucgu
.....(.(((((((((((.....)))))))))..))))))..))))))..))))..)))))
.....aucugcgcgacucauuccauca.....
.....ugugaaugaugcgggagau.....

.....aucugcgcgacucauuccaucc.....
.....aucugcgcgacucauuccauccC.....
.....ugugaaugaugcgggagauA.....
.....ugugaaugaugcgggagauG.....
.....ugugaaugaugcgggagau.....
.....ugCgaaugaugcgggagau.....
.....ugugaaugaugcgggagauuu.....

reads  mm  sample
exp
1      0    S03
2      0    S03

1      0    S04
1      1    S04
1      1    S04
1      1    S04
2      0    S04
1      1    S04
1      0    S04

```



Star

Mature

|       |           |                            |                          |                           |                             |     |   |     |
|-------|-----------|----------------------------|--------------------------|---------------------------|-----------------------------|-----|---|-----|
| c     | uuuuuacua | uccagauccggauucgacaccuccag | auaucgaguuuuuggaucggaucc | ggaucgaauccggaucucggaua   | aaaaucccaagccuaauaucuccauag |     |   |     |
| ..... |           |                            |                          | cggaucgaauccggaucucggaua  | .....                       | 25  | 0 | S04 |
| ..... |           |                            |                          | ggaucgaauccggaucucgg      | .....                       | 2   | 0 | S04 |
| ..... |           |                            |                          | ggaucgaauccggaucucgga     | .....                       | 4   | 0 | S04 |
| ..... |           |                            |                          | ggaucgaauccggaucucggau    | .....                       | 39  | 0 | S04 |
| ..... |           |                            |                          | ggaucgaauccggGucucggau    | .....                       | 1   | 1 | S04 |
| ..... |           |                            |                          | ggacCgaauccggaucucggaua   | .....                       | 2   | 1 | S04 |
| ..... |           |                            |                          | ggaucgaauccggaucucggaaA   | .....                       | 1   | 1 | S04 |
| ..... |           |                            |                          | ggaucgaauccggaucucggaua   | .....                       | 365 | 0 | S04 |
| ..... |           |                            |                          | ggGucgaauccggaucucggaua   | .....                       | 1   | 1 | S04 |
| ..... |           |                            |                          | gCaucgaauccggaucucggaua   | .....                       | 1   | 1 | S04 |
| ..... |           |                            |                          | ggaucgaauccggCaucucggaua  | .....                       | 1   | 1 | S04 |
| ..... |           |                            |                          | ggaucgaauccggGucucggaua   | .....                       | 2   | 1 | S04 |
| ..... |           |                            |                          | ggaucgaauccggaucucggaaG   | .....                       | 4   | 1 | S04 |
| ..... |           |                            |                          | ggaucgaauccggaucucggauG   | .....                       | 108 | 1 | S04 |
| ..... |           |                            |                          | ggaucgaauccggaaGucucggaua | .....                       | 1   | 1 | S04 |
| ..... |           |                            |                          | ggaucgaauccggaaAcucggaua  | .....                       | 1   | 1 | S04 |
| ..... |           |                            |                          | ggaucgaauccggaucucggauU   | .....                       | 4   | 1 | S04 |
| ..... |           |                            |                          | ggaucgaauccggaucucggauaG  | .....                       | 1   | 1 | S04 |
| ..... |           |                            |                          | ggaucgaauccggaucucggauaU  | .....                       | 1   | 1 | S04 |
| ..... |           |                            |                          | ggaucgaauccggaucucggauaa  | .....                       | 11  | 0 | S04 |
| ..... |           |                            |                          | ggaucgaauccggaucucggauaaa | .....                       | 1   | 0 | S04 |
| ..... |           |                            |                          | gaucgaauccggaucucgga      | .....                       | 1   | 0 | S04 |
| ..... |           |                            |                          | gaucgaauccggaucucggaua    | .....                       | 4   | 0 | S04 |
| ..... |           |                            |                          | gaucgaauccggaucucggauG    | .....                       | 2   | 1 | S04 |
| ..... |           |                            |                          | ccggaucucggauaaaauucca    | .....                       | 1   | 0 | S04 |
| ..... |           |                            |                          | ccggaucucggauaaaauuccaG   | .....                       | 2   | 1 | S04 |
| ..... |           |                            |                          | Gauucccaagccuaauaucucca   | .....                       | 1   | 1 | S04 |







Star

Mature

| Sequence                            | Count | Star | Mature |
|-------------------------------------|-------|------|--------|
| .....ucccaaauguagacaaagca.....      | 733   | 0    | S03    |
| .....ucccaaauguagacaaagcU.....      | 40    | 1    | S03    |
| .....ucccaGauguagacaaagca.....      | 1     | 1    | S03    |
| .....ucccaaauguagacaaGgca.....      | 2     | 1    | S03    |
| .....ucccaaauguagacGaaagca.....     | 3     | 1    | S03    |
| .....ucccaaaCguagacaaagca.....      | 1     | 1    | S03    |
| .....ucccaaauguagacaaagAa.....      | 1     | 1    | S03    |
| .....ucccaaauguagacacagca.....      | 1     | 1    | S03    |
| .....ucccaaauguagacaaaCca.....      | 2     | 1    | S03    |
| .....ucccaaauguaAacaaagca.....      | 2     | 1    | S03    |
| .....ucccaaauguagacaaaUca.....      | 3     | 1    | S03    |
| .....Ccccaaauguagacaaagca.....      | 2     | 1    | S03    |
| .....Gcccaaauguagacaaagca.....      | 2     | 1    | S03    |
| .....ucccaaaugGagacaaagca.....      | 3     | 1    | S03    |
| .....ucccaaauguagGcaaaagca.....     | 4     | 1    | S03    |
| .....uGcccaaauguagacaaagca.....     | 1     | 1    | S03    |
| .....ucccaaauguagaGaaagca.....      | 1     | 1    | S03    |
| .....ucccaCauguagacaaagca.....      | 1     | 1    | S03    |
| .....ucccaaauguaCacaaagca.....      | 1     | 1    | S03    |
| .....ucccaaauguagacaaagUa.....      | 1     | 1    | S03    |
| .....ucccaaauguagacaaaAca.....      | 1     | 1    | S03    |
| .....Ncccaaauguagacaaagca.....      | 1     | 1    | S03    |
| .....ucccaaauguUgacaaagca.....      | 2     | 1    | S03    |
| .....uccGaauguagacaaagca.....       | 3     | 1    | S03    |
| .....ucccaaauguagacaaagcG.....      | 34    | 1    | S03    |
| .....ucccaaauguGagacaaagca.....     | 2     | 1    | S03    |
| .....ucccaaauguGgacaaagca.....      | 2     | 1    | S03    |
| .....ucccaaauguagacaUagca.....      | 1     | 1    | S03    |
| .....ucccaaauguagCcaaaagca.....     | 1     | 1    | S03    |
| .....ucccaaaugCagacaaagca.....      | 4     | 1    | S03    |
| .....ucccCaauguagacaaagca.....      | 1     | 1    | S03    |
| .....ucccaaauguagacaaagcC.....      | 9     | 1    | S03    |
| .....ucccaaaugAagacaaagca.....      | 6     | 1    | S03    |
| .....ucccaaauguagacaGagca.....      | 4     | 1    | S03    |
| .....ucccaaauguagacaaagGa.....      | 1     | 1    | S03    |
| .....ucccaaauguagacaaagcUa.....     | 1     | 1    | S03    |
| .....ucccaaauguagacaaagcaU.....     | 25    | 1    | S03    |
| .....ucccaaauguagacaaagcaC.....     | 6     | 1    | S03    |
| .....ucccaaauguagacaaagcaa.....     | 2     | 0    | S03    |
| .....ccaauguagacaaagcaaaa.....      | 1     | 0    | S03    |
| .....ccaauguagacaaagcaaU.....       | 1     | 1    | S03    |
| .....ccaauguagacaaagcaaC.....       | 1     | 1    | S03    |
| .....ccaauguagacaaagcaaaaU.....     | 1     | 1    | S03    |
| .....ccaauguagacaaagcaaaac.....     | 2     | 0    | S03    |
| .....ccaauguagacaaagcaaaacU.....    | 2     | 1    | S03    |
| .....caauguagacaaagcaaaa.....       | 2     | 0    | S03    |
| .....caauguagacaaagcaaaac.....      | 8     | 0    | S03    |
| .....caauguagacaaagcaaaaU.....      | 2     | 1    | S03    |
| .....aauguagacaaagcaaaaccguga.....  | 1     | 0    | S03    |
| .....ucgguuuuucuuugucuauauucC.....  | 1     | 1    | S04    |
| .....cuuugucuauauucuuugga.....      | 3     | 0    | S04    |
| .....cuuugucuauauucuuuggaa.....     | 1     | 0    | S04    |
| .....cuuugucuauauucuuuggaag.....    | 1     | 0    | S04    |
| .....cuuugucuauauucuuuggaaU.....    | 2     | 1    | S04    |
| .....cuuugucuauauucuuuggaagU.....   | 2     | 1    | S04    |
| .....cuuugucuauauucuuuggaagC.....   | 1     | 1    | S04    |
| .....cuuugucuauauucuuuggaagaUc..... | 1     | 1    | S04    |
| .....acuuucccaaauguagacaaagc.....   | 1     | 0    | S04    |
| .....acuuucccaaauguagacaGagca.....  | 1     | 1    | S04    |
| .....acuuAcccaaauguagacaaagca.....  | 1     | 1    | S04    |
| .....acuuucccaaauguagacaaagca.....  | 1     | 0    | S04    |
| .....acuuucccaaauguagacaaagcaU..... | 1     | 1    | S04    |
| .....cuuucccaaauguagacaaagca.....   | 1     | 0    | S04    |
| .....uuucccaaauguagacaaagA.....     | 1     | 1    | S04    |
| .....uucccaaauguagacaaagc.....      | 6     | 0    | S04    |
| .....uuGcccaaauguagacaaagc.....     | 2     | 1    | S04    |
| .....uucccaaauguagacaaagA.....      | 1     | 1    | S04    |
| .....Auucccaaauguagacaaagc.....     | 1     | 1    | S04    |
| .....uuGcccaaauguagacaaagca.....    | 4     | 1    | S04    |

Star

Mature

aaaaaacacgucucucgguaauuuuuugucuaauuucuggaagaaagcgaugaggucucguugcacuuuccaaauguagacaaagcaaaaaccgugaugacgucaa

|                                  |      |   |     |
|----------------------------------|------|---|-----|
| .....uuccaaauguagacaaagcU.....   | 1    | 1 | S04 |
| .....uuccaaauguagacaaaAca.....   | 1    | 1 | S04 |
| .....uuccaaauguagacaaagcG.....   | 3    | 1 | S04 |
| .....uucccCaauugagacaaagca.....  | 1    | 1 | S04 |
| .....uucccAaauguagacaaagca.....  | 25   | 0 | S04 |
| .....uucccGaauguagacaaagca.....  | 1    | 1 | S04 |
| .....Cuuccaaauguagacaaagca.....  | 1    | 1 | S04 |
| .....uucccAaauguagacaaagcaU..... | 1    | 1 | S04 |
| .....ucccAaauguagacaaag.....     | 6    | 0 | S04 |
| .....ucccAaauguagacaaaU.....     | 1    | 1 | S04 |
| .....ucccAaauguagacaaCgc.....    | 1    | 1 | S04 |
| .....ucccAaauguGgacaaagc.....    | 2    | 1 | S04 |
| .....ucccAaauguagGcaaagc.....    | 1    | 1 | S04 |
| .....GcccAaauguagacaaagc.....    | 1    | 1 | S04 |
| .....ucccAaauguagacaaagA.....    | 11   | 1 | S04 |
| .....ucccAGaauguagacaaagc.....   | 2    | 1 | S04 |
| .....ucccAaauguagacaaaUc.....    | 1    | 1 | S04 |
| .....ucccAaauguagacaaagc.....    | 289  | 0 | S04 |
| .....ucccAaauguCgacaaagc.....    | 1    | 1 | S04 |
| .....ucccAaauguagacGaaagc.....   | 1    | 1 | S04 |
| .....ucccAaauguagacaaagU.....    | 78   | 1 | S04 |
| .....ucccAaauguagaGaaagc.....    | 1    | 1 | S04 |
| .....ucccAaauguagacaaagG.....    | 1    | 1 | S04 |
| .....ucccAaaugAagacaaagc.....    | 2    | 1 | S04 |
| .....ucccAaauguagacaaGgc.....    | 1    | 1 | S04 |
| .....NcccAaauguagacaaagc.....    | 1    | 1 | S04 |
| .....ucccAaauguagacaaaAc.....    | 3    | 1 | S04 |
| .....ucccAaauguaCacaagca.....    | 1    | 1 | S04 |
| .....ucccAaauguagacaaagca.....   | 1312 | 0 | S04 |
| .....ucccAaaAGuagacaaagca.....   | 1    | 1 | S04 |
| .....ucccAaauguagacaaagAa.....   | 2    | 1 | S04 |
| .....ucccAaauguagacCaaagca.....  | 1    | 1 | S04 |
| .....ucUcAaauguagacaaagca.....   | 1    | 1 | S04 |
| .....uccGaauguagacaaagca.....    | 1    | 1 | S04 |
| .....GcccAaauguagacaaagca.....   | 4    | 1 | S04 |
| .....ucccAaauguagacaaagcG.....   | 87   | 1 | S04 |
| .....ucccAaauguagCcaaagca.....   | 1    | 1 | S04 |
| .....ucccAaauguagGcaaagca.....   | 5    | 1 | S04 |
| .....ucccAaauguagacaaUgca.....   | 3    | 1 | S04 |
| .....ucccAaauguagacagca.....     | 2    | 1 | S04 |
| .....ucccAaaugCagacaaagca.....   | 6    | 1 | S04 |
| .....ucccAaauguagacaaagcC.....   | 9    | 1 | S04 |
| .....ucccAaaCguagacaaagca.....   | 2    | 1 | S04 |
| .....ucGcAaauguagacaaagca.....   | 1    | 1 | S04 |
| .....ucccAaauguUgacaaagca.....   | 2    | 1 | S04 |
| .....ucccGaauguagacaaagca.....   | 4    | 1 | S04 |
| .....ucccAaauguagacaaGgca.....   | 2    | 1 | S04 |
| .....ucccCaauugagacaaagca.....   | 1    | 1 | S04 |
| .....ucccAaauguagacaaagUa.....   | 1    | 1 | S04 |
| .....ucccAGaauguagacaaagca.....  | 3    | 1 | S04 |
| .....ucccAaauguagacaaaAca.....   | 13   | 1 | S04 |
| .....ucccAaaugAagacaaagca.....   | 6    | 1 | S04 |
| .....NcccAaauguagacaaagca.....   | 3    | 1 | S04 |
| .....CcccAaauguagacaaagca.....   | 7    | 1 | S04 |
| .....ucccAaaUuagacaaagca.....    | 1    | 1 | S04 |
| .....ucccAaaugGagacaaagca.....   | 9    | 1 | S04 |
| .....ucccAaUuguagacaaagca.....   | 1    | 1 | S04 |
| .....uGccAaauguagacaaagca.....   | 2    | 1 | S04 |
| .....ucccAaauguaUacaagca.....    | 3    | 1 | S04 |
| .....ucccAaauguagacGaaagca.....  | 3    | 1 | S04 |
| .....AcccAaauguagacaaagca.....   | 2    | 1 | S04 |
| .....ucccAaGuguagacaaagca.....   | 1    | 1 | S04 |
| .....uccAaauguagacaaagca.....    | 1    | 1 | S04 |
| .....ucccAaauguagacaaagcU.....   | 113  | 1 | S04 |
| .....ucccAaauguGgacaaagca.....   | 4    | 1 | S04 |
| .....uccUaauguagacaaagca.....    | 2    | 1 | S04 |
| .....ucccAaauguagacaaaCca.....   | 2    | 1 | S04 |
| .....ucccAaauguagacaaaUca.....   | 3    | 1 | S04 |
| .....ucccAaauguagacaaagcaa.....  | 6    | 0 | S04 |
| .....ucccAaauguagacaaagcaC.....  | 13   | 1 | S04 |



Star

Mature

|                                                                                                            |    |   |     |
|------------------------------------------------------------------------------------------------------------|----|---|-----|
| aaaaaaacacgucucucgguaauuuuuugucuaauuucuggaagaaagcgaugaggucucguugcacuucccaaauguagacaaagcaaaaccgugaugacgucaa |    |   |     |
| .....ucccaaauguagacaaagcUa.....                                                                            | 2  | 1 | S04 |
| .....ucccaaauguagacaaagcaU.....                                                                            | 85 | 1 | S04 |
| .....ucccaaauguagacaaagcaG.....                                                                            | 1  | 1 | S04 |
| .....ucccaaauguagacaaagcaaU.....                                                                           | 6  | 1 | S04 |
| .....ucccaaauguagacaaagcaUa.....                                                                           | 1  | 1 | S04 |
| .....ucccaaauguagacaaagcaaC.....                                                                           | 1  | 1 | S04 |
| .....ucccaaauguagacaaagcaUaa.....                                                                          | 1  | 1 | S04 |
| .....ucccaaauguagacaaagcaUa.....                                                                           | 1  | 1 | S04 |
| .....ucccaaauguagacaaagcaaaUc.....                                                                         | 1  | 1 | S04 |
| .....ccaauguagacaaagcaaaac.....                                                                            | 3  | 0 | S04 |
| .....ccaauguagacaaagcaaaaU.....                                                                            | 2  | 1 | S04 |
| .....ccaauguagacaaagcaaaaUc.....                                                                           | 1  | 1 | S04 |
| .....caaUuguagacaaagcaaaac.....                                                                            | 1  | 1 | S04 |
| .....Naauguagacaaagcaaaac.....                                                                             | 1  | 1 | S04 |
| .....caaauguagacaaagcaaaUc.....                                                                            | 1  | 1 | S04 |
| .....caaauguagacaaagcaaaac.....                                                                            | 10 | 0 | S04 |
| .....caaauguagacaaagcaaaaUc.....                                                                           | 3  | 1 | S04 |
| .....aauguagacaaagcaaaaaccguga.....                                                                        | 1  | 0 | S04 |
| .....auguagacaaagcaaaaaccguga.....                                                                         | 1  | 0 | S04 |





Star

Mature

|           |                                                                                                                 |    |   |     |
|-----------|-----------------------------------------------------------------------------------------------------------------|----|---|-----|
| uauuuuuuu | aucggaauugucgucggaagucgucgggaaauuuccgacgagccauguuuuucucgggaaauucgucgggaauggucgacgggaaauuccgacgacucaaaauuuuuuguu |    |   |     |
| .....     | aucggaauugucgucggaagucgu.....                                                                                   | 2  | 0 | S04 |
| .....     | ucggaaagucgucgggaaauuccg.....                                                                                   | 1  | 0 | S04 |
| .....     | aaagucgucgggaaauuccga.....                                                                                      | 1  | 0 | S04 |
| .....     | guuuucucgggaaauucgucggaaa.....                                                                                  | 1  | 0 | S04 |
| .....     | ucgacgggaaauuccgacgCcu.....                                                                                     | 1  | 1 | S04 |
| .....     | Agacgggaaauuccgacgac.....                                                                                       | 1  | 1 | S04 |
| .....     | cgcggaauuccgacgCcu.....                                                                                         | 3  | 1 | S04 |
| .....     | cgcggaauuccgacgacu.....                                                                                         | 1  | 0 | S04 |
| .....     | cgcggaauuccgacgacu.....                                                                                         | 1  | 0 | S04 |
| .....     | cgcggaauuccgacgacuucG.....                                                                                      | 1  | 1 | S04 |
| .....     | cgcggaauuccgacgacuca.....                                                                                       | 5  | 0 | S04 |
| .....     | cgcggaauuccgacgacuGca.....                                                                                      | 1  | 1 | S04 |
| .....     | cgcggaauuccgacgacucaaaa.....                                                                                    | 2  | 0 | S04 |
| .....     | cgcggaauuccgacgacucaaaauuu.....                                                                                 | 1  | 0 | S04 |
| .....     | gacgggaaauuccgacgacu.....                                                                                       | 5  | 0 | S04 |
| .....     | gacgggaaauuccgacgacu.....                                                                                       | 1  | 1 | S04 |
| .....     | gacgggaaauuccgacgacuucU.....                                                                                    | 1  | 1 | S04 |
| .....     | gacgggaaauuccgacgacuca.....                                                                                     | 2  | 0 | S04 |
| .....     | gacgggaaauuccgacgacucaa.....                                                                                    | 2  | 0 | S04 |
| .....     | gacgggaaauuccgacgacucaaaG.....                                                                                  | 1  | 1 | S04 |
| .....     | gacgggaaauuccgacgacucaaaau.....                                                                                 | 29 | 0 | S04 |
| .....     | gacgggaaauuccgacgacucaaaau.....                                                                                 | 2  | 0 | S04 |
| .....     | acgggaaauuccgacgacucaaaau.....                                                                                  | 5  | 0 | S04 |
| .....     | cgggaaauuccgacgacuca.....                                                                                       | 1  | 0 | S04 |
| .....     | cgggaaauuccgacgacucaaaau.....                                                                                   | 1  | 0 | S04 |
| .....     | auuccgacgacucaaaauuuuA.....                                                                                     | 1  | 1 | S04 |
| .....     | auuccgacgacucaaaauuuuug.....                                                                                    | 1  | 0 | S04 |
| .....     | uuccgacgacucaaaauuuuA.....                                                                                      | 1  | 1 | S04 |
| .....     | uuccgacgacucaaaauuuuug.....                                                                                     | 1  | 0 | S04 |
| .....     | uccgacgacucaaaauuuuuguu.....                                                                                    | 1  | 0 | S04 |
| .....     | cgcgacucaaaauuuuuguu.....                                                                                       | 1  | 0 | S04 |



**Mature**

**Star**

cuccgaggaccaccaguucgucggaaaagucccggaauuacugagggaggacuuccucggaauuuuuuggaggaauuuuuaugguccaauccuuggaaguuccga  
.....gauggacuuccuauuggu.....

1

0

S04

Provisional ID : chrA06\_495712  
 Score total : 6.8  
 Score for star read(s) : 3.9  
 Score for read counts : 1.7  
 Score for mfe : 1.3  
 Score for randfold : 0  
 Score for cons. seed :  
 Total read count : 15  
 Mature read count : 4  
 Loop read count : 9  
 Star read count : 2

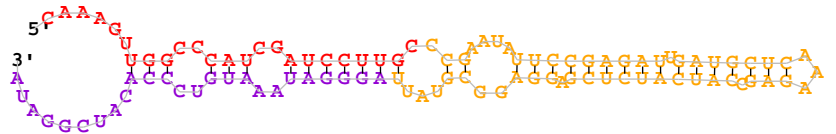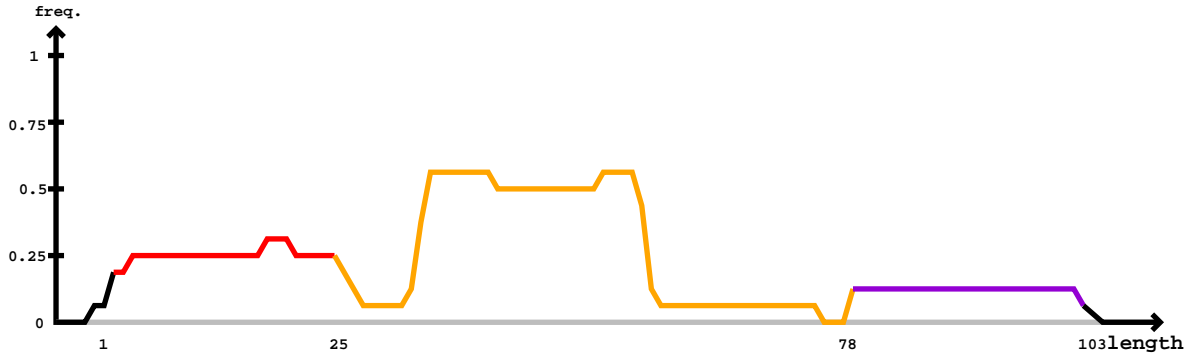

**Mature**

**Star**

| 5' -                                                                                                                                   | reads | mm | sample |
|----------------------------------------------------------------------------------------------------------------------------------------|-------|----|--------|
| aguc <b>caaaguuggcccaucgauc</b> ccuugc <b>ccgaaauuuccgagauugaugcucaaagagcc</b> caucucgaggaggcgauu <b>agggauaaaugucccaucggauuugaaaa</b> | 1     | 0  | S03    |
| aguc <b>caaaguuggcccaucgauc</b> ccuugc <b>ccgaaauuuccgagauugaugcucaaagagcc</b> caucucgaggaggcgauu <b>agggauaaaugucccaucggauuugaaaa</b> | 2     | 1  | S03    |
| .....uccaaaguuggcccaucgauc.....                                                                                                        | 1     | 1  | S03    |
| .....Aaaaguuggcccaucgauc                                                                                                               | 1     | 0  | S03    |
| .....uccgagauugaugcucaaagagcA.....                                                                                                     | 1     | 0  | S03    |
| .....ccgagauugaugcucaaagagc.....                                                                                                       | 1     | 0  | S03    |
| .....agggauaaaugucccaucggau.....                                                                                                       | 1     | 0  | S03    |
| .....aaguuggcccaucgauc                                                                                                                 | 1     | 0  | S04    |
| .....auccuugcccgaaauuuccgagaC.....                                                                                                     | 1     | 1  | S04    |
| .....uuccgagauugaugcucaaagagA.....                                                                                                     | 1     | 1  | S04    |
| .....uccgagauugaugcucaaagagcA.....                                                                                                     | 1     | 1  | S04    |
| .....uccgagauugaugcucaaagagcc.....                                                                                                     | 2     | 0  | S04    |
| .....ccgagauugaugcucaaagaAcc.....                                                                                                      | 1     | 1  | S04    |
| .....ccgagauugaugcucaaagagcca.....                                                                                                     | 1     | 0  | S04    |
| .....gagccaucucgaggaggAgu.....                                                                                                         | 1     | 1  | S04    |
| .....agggauaaaugucccaucggau.....                                                                                                       | 1     | 0  | S04    |





Mature

Star

| Sequence                                                                                                        | Count | Count | Category |
|-----------------------------------------------------------------------------------------------------------------|-------|-------|----------|
| ucgacggaauuccgaggaauugaauuuccgagaaaauccgaggaaccaccaguucgucggaaggucuccggaauauuccgagggagcacuuccucggaauuuccgaggaag |       |       |          |
| .cgacggaauuccgaggaaua                                                                                           | 2     | 0     | S04      |
| .cgacggaauuccgaggaauu                                                                                           | 4     | 0     | S04      |
| .cgacggaauuccgaggaauug                                                                                          | 2     | 0     | S04      |
| .cgacggaauuccgaggaauugaau                                                                                       | 6     | 0     | S04      |
| .gacggaauuccgaggaaua                                                                                            | 5     | 0     | S04      |
| .gacggaauuccgaggaauu                                                                                            | 6     | 0     | S04      |
| .gacggaauuccgaggaauug                                                                                           | 1     | 0     | S04      |
| .gacggaauuccgaggaauuga                                                                                          | 1     | 0     | S04      |
| .gacggaauuccAaggaauuga                                                                                          | 1     | 1     | S04      |
| .gacggaauuccgaggaauugaa                                                                                         | 1     | 0     | S04      |
| .gacggaauuccgaggaauugaau                                                                                        | 3     | 0     | S04      |
| .gacggaauuccgaggaauugaaC                                                                                        | 2     | 1     | S04      |
| .gacggaauuccgaggaauugaauC                                                                                       | 2     | 1     | S04      |
| .Aacggaauuccgaggaauugaauu                                                                                       | 1     | 1     | S04      |
| .gacggaauuccgaggaauugaauu                                                                                       | 39    | 0     | S04      |
| .gacggGauuccgaggaauugaauu                                                                                       | 1     | 1     | S04      |
| .gaUggaauuccgaggaauugaauu                                                                                       | 1     | 1     | S04      |
| .acggaauuccgaggaauugaau                                                                                         | 1     | 0     | S04      |
| .acggaauuccgaggaauugaauu                                                                                        | 4     | 0     | S04      |
| .acggaauuccgaggaauugaauuC                                                                                       | 1     | 1     | S04      |
| .acggaauuccUaggaauugaauuu                                                                                       | 1     | 1     | S04      |
| .acggaauuccgaggaauugaauuG                                                                                       | 1     | 1     | S04      |
| .acggaauuccgaggaauugaauuu                                                                                       | 4     | 0     | S04      |
| .cggaauuccgaggaauugaauuu                                                                                        | 2     | 0     | S04      |
| .aauccgaggaauugaauuuc                                                                                           | 1     | 0     | S04      |
| .aauccgaggaauugaauuuccga                                                                                        | 1     | 0     | S04      |
| .auuccgaggaauugaauuucc                                                                                          | 2     | 0     | S04      |
| .aacuccgaggaaccaccaguucgu                                                                                       | 2     | 0     | S04      |
| .aggaccaccaguucgucggacagA                                                                                       | 1     | 1     | S04      |
| .gaGagguccucggaauauuccg                                                                                         | 1     | 1     | S04      |
| .gaUagguccucggaauauuccg                                                                                         | 1     | 1     | S04      |
| .ggaauauuccgagggagcacuucU                                                                                       | 1     | 1     | S04      |

Provisional ID : chrA06\_523926  
 Score total : 0.1  
 Score for star read(s) : 3.9  
 Score for read counts : -4.9  
 Score for mfe : 1.2  
 Score for randfold : 0  
 Score for cons. seed :  
 Total read count : 2  
 Mature read count : 1  
 Loop read count : 0  
 Star read count : 1

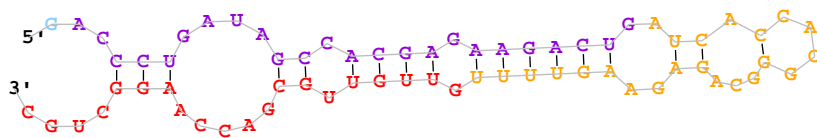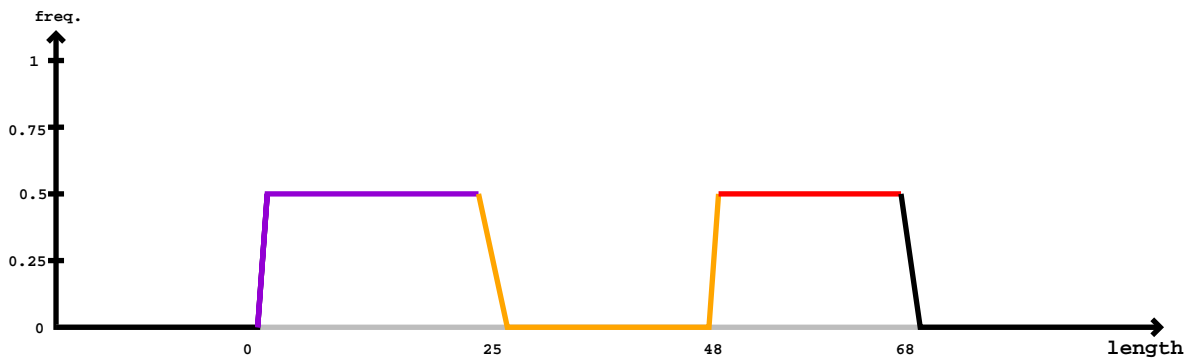

**Star**

**Mature**

|      |                                         |                         |                         |                      |                          |     |       |    |        |
|------|-----------------------------------------|-------------------------|-------------------------|----------------------|--------------------------|-----|-------|----|--------|
| 5' - | acagcgcaaaauuggcagcg                    | accugauagccacgagaagacug | aucaccaaggccagagaaguuuu | guuguugcgaccaaggcugc | uguugguuacgauuguuguuguuu | -3' | obs   |    |        |
|      | acagcgcaaaauuggcagcg                    | accugauagccacgagaagacug | aucaccaaggccagagaaguuuu | guuguugcgaccaaggcugc | uguugguuacgauuguuguuguuu |     | exp   |    |        |
|      | (((((((((((((.....))))))))))))))))..... |                         |                         |                      |                          |     | reads | mm | sample |
|      | .....accugauagccacgagaagacuA.....       |                         |                         |                      |                          |     | 1     | 1  | S04    |
|      | .....guuguugcgaccaaggcuUc.....          |                         |                         |                      |                          |     | 1     | 1  | S04    |

Provisional ID : chrA06\_527292  
 Score total : 2.4  
 Score for star read(s) : 3.9  
 Score for read counts : -3.9  
 Score for mfe : 2.5  
 Score for randfold : 0  
 Score for cons. seed :  
 Total read count : 4  
 Mature read count : 3  
 Loop read count : 0  
 Star read count : 1

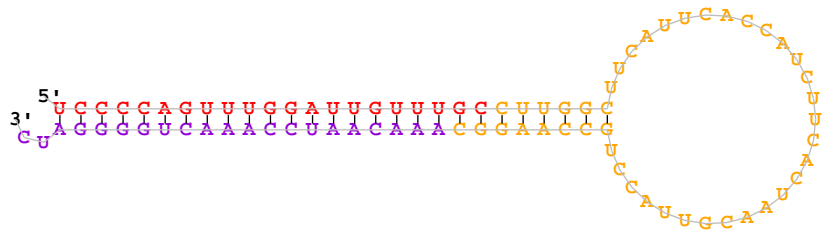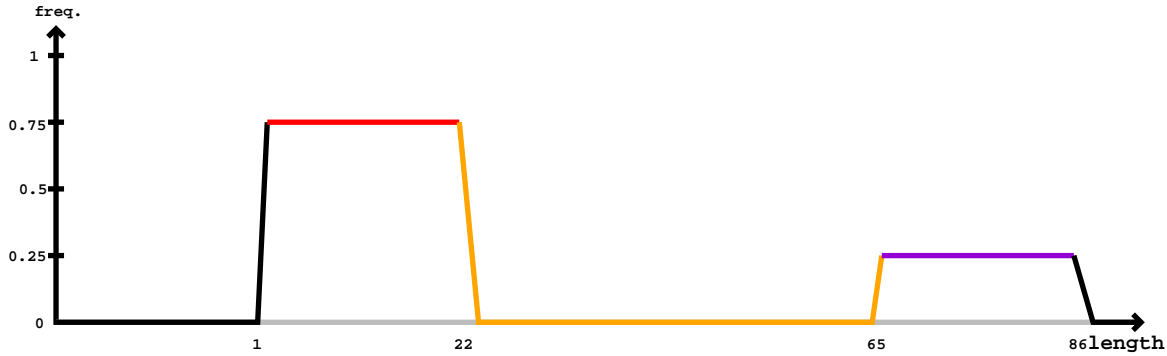

**Mature**

**Star**

|                           |                               |                                                   |                                    |       |     |        |  |
|---------------------------|-------------------------------|---------------------------------------------------|------------------------------------|-------|-----|--------|--|
| 5' - uuauaucucucucucuauga | <b>u</b> ccccaguuuggauuguuugc | <b>c</b> uuggcucauucaccaucuuacuaacguuaccugccaaggc | <b>a</b> aacaauccaacuggggaucuuagaa | -3'   | obs |        |  |
| uuauaucucucucucuauga      | <b>u</b> ccccaguuuggauuguuugc | <b>c</b> uuggcucauucaccaucuuacuaacguuaccugccaaggc | <b>a</b> aacaauccaacuggggaucuuagaa |       | exp |        |  |
| .....(((.....)))).....    | .....                         | .....                                             | .....                              | reads | mm  | sample |  |
| .....u                    | ccccaguuuggauuguugc.....      | .....                                             | .....                              | 1     | 0   | S03    |  |
| .....                     | .....                         | .....                                             | .....aacaauccaacuggggauc.....      | 1     | 0   | S03    |  |
| .....                     | ccccaguuuggauuguugc.....      | .....                                             | .....                              | 2     | 0   | S04    |  |





Mature

Star

|                                                                                                                    |    |   |     |
|--------------------------------------------------------------------------------------------------------------------|----|---|-----|
| cuudaucgucuccgucacacucucucucugcagucaggacagcucagagucucugccacugcugcagcggcuugcgucucucuuugucucugcgguacugcuugaagcagugga |    |   |     |
| .....ccucugcagucaggacagUuca.....                                                                                   | 1  | 1 | S03 |
| .....ucugcagucaggacagcucagagG.....                                                                                 | 1  | 1 | S03 |
| .....ugcagucaggacagUuca.....                                                                                       | 2  | 1 | S03 |
| .....uccugcgguacugcuugaaAc.....                                                                                    | 1  | 1 | S03 |
| .....uccugcgguacugcuugaaAcaguu.....                                                                                | 2  | 1 | S03 |
| .....ucUugcgguacugcuugaagcaguu.....                                                                                | 2  | 1 | S03 |
| .....ccugcgguacugcuugaaAcaguu.....                                                                                 | 1  | 1 | S03 |
| .....ccucggguacugcuugaAcaguu.....                                                                                  | 1  | 1 | S03 |
| .....Uugcgguacugcuugaagcaguu.....                                                                                  | 2  | 1 | S03 |
| .....cugcgguacugcuugaaAcaguu.....                                                                                  | 1  | 1 | S03 |
| .....ugcgguacugcuugaagcaguu.....                                                                                   | 1  | 0 | S03 |
| .....gcgguacugcuugaUcaguu.....                                                                                     | 1  | 1 | S03 |
| .....gcgguacugcuugaagcaguu.....                                                                                    | 1  | 0 | S03 |
| .....gcgguacugcuugaagcaguu.....                                                                                    | 1  | 0 | S03 |
| .....aaccucuccucugcagucaggac.....                                                                                  | 1  | 0 | S04 |
| .....aaccucuccucugcagucaggac.....                                                                                  | 2  | 0 | S04 |
| .....aaccucuccucugcagucaggacG.....                                                                                 | 1  | 1 | S04 |
| .....aaccucuccucugcagucaggaca.....                                                                                 | 2  | 0 | S04 |
| .....accucuccucugcagucaggac.....                                                                                   | 5  | 0 | S04 |
| .....accucuccucugcagucaggacG.....                                                                                  | 1  | 1 | S04 |
| .....accucuccucugcagucaggaca.....                                                                                  | 12 | 0 | S04 |
| .....accucuccucugcagucaggacU.....                                                                                  | 1  | 1 | S04 |
| .....accucuccucugcagucaggacag.....                                                                                 | 4  | 0 | S04 |
| .....Nccucuccucugcagucaggacag.....                                                                                 | 1  | 1 | S04 |
| .....ccucuccucugcagucaggac.....                                                                                    | 1  | 0 | S04 |
| .....ccucuccucugcagucaggac.....                                                                                    | 1  | 0 | S04 |
| .....ccucuccucugcagucaggaca.....                                                                                   | 14 | 0 | S04 |
| .....ccucuccucugcagucaggacG.....                                                                                   | 1  | 1 | S04 |
| .....ccucuccucugcagucaggacag.....                                                                                  | 1  | 0 | S04 |
| .....ccucuccucugcagucaggacagG.....                                                                                 | 3  | 1 | S04 |
| .....ccucuccucugcagucaggacagU.....                                                                                 | 32 | 1 | S04 |
| .....ccucuccucugcagucaggacagc.....                                                                                 | 5  | 0 | S04 |
| .....cucuccucugcagucaggac.....                                                                                     | 1  | 0 | S04 |
| .....cucuccucugcagucaggaca.....                                                                                    | 8  | 0 | S04 |
| .....cucuccucugcagucaggacag.....                                                                                   | 1  | 0 | S04 |
| .....cucuccucugcagucaggacagG.....                                                                                  | 2  | 1 | S04 |
| .....cucuccucugcagucaggacagc.....                                                                                  | 2  | 0 | S04 |
| .....cucuccucugcagucaggacagU.....                                                                                  | 9  | 1 | S04 |
| .....cucuccucugcagucaggacaAc.....                                                                                  | 1  | 1 | S04 |
| .....cucuccucugcagucaggacagUu.....                                                                                 | 5  | 1 | S04 |
| .....ucuccucugcagucaggaca.....                                                                                     | 3  | 0 | S04 |
| .....ucuccucugcagucaggacag.....                                                                                    | 1  | 0 | S04 |
| .....ucuccucugcagucaggacagU.....                                                                                   | 18 | 1 | S04 |
| .....ucuccucugcagucaggacagG.....                                                                                   | 2  | 1 | S04 |
| .....Cuccucugcagucaggacagc.....                                                                                    | 1  | 1 | S04 |
| .....ucuccucugcagucaggacagUu.....                                                                                  | 5  | 1 | S04 |
| .....ucuccucugcagucaggacagcuc.....                                                                                 | 1  | 1 | S04 |
| .....cuccucugcagucaggaca.....                                                                                      | 7  | 0 | S04 |
| .....cuccucugcaAucaggaca.....                                                                                      | 1  | 1 | S04 |
| .....cuccucugcagucaggacag.....                                                                                     | 1  | 0 | S04 |
| .....cuccucugcagucaggacagc.....                                                                                    | 1  | 0 | S04 |
| .....cuccucuaCagucaggacagc.....                                                                                    | 1  | 1 | S04 |
| .....cuccucugcagucaggacagG.....                                                                                    | 1  | 1 | S04 |
| .....cuccucugcagucaggacagU.....                                                                                    | 7  | 1 | S04 |
| .....cuccucugcagucaggacagUu.....                                                                                   | 4  | 1 | S04 |
| .....cuccucugcagucaggacagUuca.....                                                                                 | 2  | 1 | S04 |
| .....uccucugcagucaggaca.....                                                                                       | 1  | 0 | S04 |
| .....uccucugcagucaggacagU.....                                                                                     | 1  | 1 | S04 |
| .....uccucugcagucaggacagUu.....                                                                                    | 4  | 1 | S04 |
| .....uccucugcagucaggacagUuc.....                                                                                   | 6  | 1 | S04 |
| .....uccucugcagucaggacagUuca.....                                                                                  | 1  | 1 | S04 |
| .....ccucugcagucaggacagU.....                                                                                      | 2  | 1 | S04 |
| .....ccucugcagucaggacagUu.....                                                                                     | 1  | 1 | S04 |
| .....ccucugcagucaggacagUuca.....                                                                                   | 6  | 1 | S04 |
| .....cucugcagucaggacagUuc.....                                                                                     | 1  | 1 | S04 |
| .....cucugcagucaggacagUuca.....                                                                                    | 1  | 1 | S04 |
| .....ucugcagucaggacagUu.....                                                                                       | 1  | 1 | S04 |
| .....cugcagucaggacagUuca.....                                                                                      | 2  | 1 | S04 |
| .....ugcagucaggacagUuca.....                                                                                       | 1  | 1 | S04 |

**Mature**

**Star**

|                                                                                                                |   |   |     |
|----------------------------------------------------------------------------------------------------------------|---|---|-----|
| cuucaucgucccguaaacucuccucugcagucggacagcucagagucuuugccacugcugcagcggcuugcgguucuuuuguuucugcgguacugcuugaagcaguugga |   |   |     |
| .....uccugcgguacugcuugaaAc.....                                                                                | 1 | 1 | S04 |
| .....ucUugcgguacugcuugaagcagu....                                                                              | 1 | 1 | S04 |
| .....uccugcgguacugcuugaaAcagu....                                                                              | 3 | 1 | S04 |
| .....cUugcgguacugcuugaagca.....                                                                                | 1 | 1 | S04 |
| .....ccugcgguacugcuugaaAcag.....                                                                               | 1 | 1 | S04 |
| .....ccugcgguacugcuugaaAcagu....                                                                               | 1 | 1 | S04 |
| .....cugcgguacugcuugaaAcagu....                                                                                | 1 | 1 | S04 |
| .....ugcggCacugcuugaagcagu....                                                                                 | 1 | 1 | S04 |
| .....ugcgguacugcuugaagcagu....                                                                                 | 1 | 0 | S04 |
| .....gcgguacugcuugaagcagu....                                                                                  | 1 | 0 | S04 |
| .....gcgguacugcuugaagcaguu...                                                                                  | 1 | 0 | S04 |
| .....gcgguacugcuugaagcaguugga                                                                                  | 1 | 0 | S04 |









Mature

Star

| Sequence                            | Mature Count | Star Count | Category |
|-------------------------------------|--------------|------------|----------|
| ccuucuuuaaaaauuaggguaaaaauuaguguaaa | 32           | 0          | S03      |
| .....aaacaugaaaagugguacuauugaa      | 2            | 1          | S03      |
| .....aaacaugCaaagugguacuauugaa      | 2            | 1          | S03      |
| .....aaacaugaaaagugguacuauugaaC     | 1            | 1          | S03      |
| .....aCacaugaaaagugguacuauugaaU     | 6            | 0          | S03      |
| .....aaacaugaaaagugguacuauugaaU     | 1            | 1          | S03      |
| .....aaacaugaaaagugguacuauugaaG     | 1            | 1          | S03      |
| .....aaacaugaaaagugguacuauugaaA     | 1            | 1          | S03      |
| .....aaacaugaaaagugguacuauugaaUC    | 1            | 0          | S03      |
| .....aaacaugaaaagugguacuauugaa      | 11           | 0          | S03      |
| .....aaacaugaaaagugguacuauugaa      | 11           | 0          | S03      |
| .....aaacaugaaaagugguacuauugaaG     | 3            | 1          | S03      |
| .....aaacaugCaaagugguacuauugaa      | 106          | 0          | S03      |
| .....aaacaugCaaagugguacuauugaaU     | 1            | 1          | S03      |
| .....aaacaugaaaagugguacuauugaaG     | 3            | 1          | S03      |
| .....aaacaugaaaagugguacuauugaaU     | 1            | 1          | S03      |
| .....aaacaugaaaagugguacuauugaaG     | 3            | 1          | S03      |
| .....aaacaugaaaagugguacuauugaaC     | 10           | 1          | S03      |
| .....aaacaugaaaagugguacuauugaaA     | 4            | 1          | S03      |
| .....aaacaugaaGaaagugguacuauugaaU   | 1            | 1          | S03      |
| .....aaacaugaaaagugguacuauugaaU     | 1            | 1          | S03      |
| .....aaacaugaaaagugguacuauugaaU     | 3            | 0          | S03      |
| .....aaacaugaaaagugguacuauugaaU     | 1            | 0          | S03      |
| .....aaacaugaaaagugguacuauugaaU     | 2            | 0          | S03      |
| .....aaacaugaaaagugguacuauugaaU     | 1            | 0          | S03      |
| .....aaacaugaaaagugguacuauugaaU     | 2            | 0          | S03      |
| .....aaacaugaaaagugguacuauugaaU     | 1            | 1          | S03      |
| .....aaacaugaaaagugguacuauugaaU     | 5            | 0          | S03      |
| .....aaacaugaaaagugguacuauugaaU     | 1            | 1          | S03      |
| .....aaacaugaaaagugguacuauugaaU     | 2            | 1          | S03      |
| .....aaacaugaaaagugguacuauugaaU     | 1            | 1          | S03      |
| .....aaacaugaaaagugguacuauugaaU     | 1            | 1          | S03      |
| .....aaacaugaaaagugguacuauugaaU     | 1            | 1          | S03      |
| .....aaacaugaaaagugguacuauugaaU     | 107          | 0          | S03      |
| .....aaacaugaaaagugguacuauugaaU     | 2            | 1          | S03      |
| .....aaacaugaaaagugguacuauugaaU     | 2            | 0          | S03      |
| .....aaacaugaaaagugguacuauugaaU     | 9            | 0          | S03      |
| .....aaacaugaaaagugguacuauugaaU     | 3            | 0          | S03      |
| .....aaacaugaaaagugguacuauugaaU     | 1            | 1          | S03      |
| .....aaacaugaaaagugguacuauugaaU     | 30           | 0          | S03      |
| .....aaacaugaaaagugguacuauugaaU     | 1            | 1          | S03      |
| .....aaacaugaaaagugguacuauugaaU     | 1            | 1          | S03      |
| .....aaacaugaaaagugguacuauugaaU     | 5            | 1          | S03      |
| .....aaacaugaaaagugguacuauugaaU     | 3            | 1          | S03      |
| .....aaacaugaaaagugguacuauugaaU     | 1            | 1          | S03      |
| .....aaacaugaaaagugguacuauugaaU     | 1            | 1          | S03      |
| .....aaacaugaaaagugguacuauugaaU     | 79           | 0          | S03      |
| .....aaacaugaaaagugguacuauugaaU     | 55           | 1          | S03      |
| .....aaacaugaaaagugguacuauugaaU     | 7            | 1          | S03      |
| .....aaacaugaaaagugguacuauugaaU     | 5            | 1          | S03      |
| .....aaacaugaaaagugguacuauugaaU     | 8            | 1          | S03      |
| .....aaacaugaaaagugguacuauugaaU     | 1            | 1          | S03      |
| .....aaacaugaaaagugguacuauugaaU     | 3            | 1          | S03      |
| .....aaacaugaaaagugguacuauugaaU     | 1            | 1          | S03      |
| .....aaacaugaaaagugguacuauugaaU     | 4            | 1          | S03      |
| .....aaacaugaaaagugguacuauugaaU     | 77           | 1          | S03      |
| .....aaacaugaaaagugguacuauugaaU     | 1423         | 0          | S03      |
| .....aaacaugaaaagugguacuauugaaU     | 1            | 1          | S03      |
| .....aaacaugaaaagugguacuauugaaU     | 15           | 1          | S03      |
| .....aaacaugaaaagugguacuauugaaU     | 1            | 1          | S03      |
| .....aaacaugaaaagugguacuauugaaU     | 6            | 1          | S03      |
| .....aaacaugaaaagugguacuauugaaU     | 2            | 1          | S03      |
| .....aaacaugaaaagugguacuauugaaU     | 6            | 1          | S03      |
| .....aaacaugaaaagugguacuauugaaU     | 2            | 1          | S03      |
| .....aaacaugaaaagugguacuauugaaU     | 3            | 1          | S03      |
| .....aaacaugaaaagugguacuauugaaU     | 1            | 1          | S03      |
| .....aaacaugaaaagugguacuauugaaU     | 1            | 1          | S03      |
| .....aaacaugaaaagugguacuauugaaU     | 95           | 0          | S03      |
| .....aaacaugaaaagugguacuauugaaU     | 1            | 1          | S03      |

Mature

Star

ccuucuuuaaaaauuaggguaaaaauuaguguaaacaugaaaaagugguacuaugaauuguguuuuuugugguauuuucucuuuacauaggggguuguuuuuuuuauacacaa

|                                         |     |   |     |
|-----------------------------------------|-----|---|-----|
| .....cUgaaaaagugguacuaugaauugugu.....   | 2   | 1 | S03 |
| .....Gaugaaaaagugguacuaugaauugugu.....  | 1   | 1 | S03 |
| .....caugaaaaagugguacuaugaauugugu.....  | 2   | 0 | S03 |
| .....caugaaaaagugguacuaugaauuguguu..... | 1   | 0 | S03 |
| .....augaaaaagugguacuaug.....           | 1   | 0 | S03 |
| .....augaaaaagugguacuauga.....          | 2   | 0 | S03 |
| .....augaaaaagugguacuaugaCu.....        | 1   | 1 | S03 |
| .....augaaaaagugguacuaugaau.....        | 9   | 0 | S03 |
| .....augaaaaagugguacuaugaauC.....       | 2   | 1 | S03 |
| .....augaaaaagugguacuaugaauug.....      | 37  | 0 | S03 |
| .....augaaaaagugguacuaugaauuG.....      | 3   | 1 | S03 |
| .....augaaaGgugguacuaugaauugu.....      | 1   | 1 | S03 |
| .....augaaaaagugguacuaugaauugu.....     | 60  | 0 | S03 |
| .....augaaaaagugguacuaugaauuG.....      | 2   | 1 | S03 |
| .....augaaaaagugguacuaugaauuGG.....     | 2   | 1 | S03 |
| .....augaaaGgugguacuaugaauugug.....     | 5   | 1 | S03 |
| .....augCaaagugguacuaugaauugug.....     | 14  | 1 | S03 |
| .....augaaaaagugguacuaugaauuguU.....    | 9   | 1 | S03 |
| .....augaaaaagugguacuaugaauugug.....    | 1   | 1 | S03 |
| .....Nugaaaaagugguacuaugaauugug.....    | 3   | 1 | S03 |
| .....augaaaaagugguacuaugaauugug.....    | 573 | 0 | S03 |
| .....augaaaaagugguacuaugaUaugug.....    | 1   | 1 | S03 |
| .....augaGaaagugguacuaugaauugug.....    | 1   | 1 | S03 |
| .....augaaaaaguggGacuaugaauugug.....    | 2   | 1 | S03 |
| .....augaUaaagugguacuaugaauugug.....    | 1   | 1 | S03 |
| .....augaaaagugguacuaugaGugug.....      | 1   | 1 | S03 |
| .....augaaaagugguacuaugaauuAg.....      | 1   | 1 | S03 |
| .....augaaaagugguacuaugaauugugu.....    | 4   | 0 | S03 |
| .....ugaaaagugguacuaugaau.....          | 2   | 0 | S03 |
| .....ugaaaagugguacuaugaauug.....        | 14  | 0 | S03 |
| .....Ngaaaagugguacuaugaauugu.....       | 1   | 1 | S03 |
| .....ugaaaagugguacuaugaauuGG.....       | 1   | 1 | S03 |
| .....ugaaaGgugguacuaugaauugu.....       | 2   | 1 | S03 |
| .....ugaaaagugguacuaugaauuG.....        | 1   | 1 | S03 |
| .....ugCaaagugguacuaugaauugu.....       | 3   | 1 | S03 |
| .....ugaaaagugguacuaugaauugu.....       | 71  | 0 | S03 |
| .....ugaaaagugguacuaugaauuguU.....      | 4   | 1 | S03 |
| .....ugaGaaagugguacuaugaauugug.....     | 2   | 1 | S03 |
| .....ugaaaagugguacuaugaauugug.....      | 91  | 0 | S03 |
| .....ugaaaagCggguacuaugaauugugu.....    | 1   | 1 | S03 |
| .....ugaaaagugguacCaugaauugugu.....     | 1   | 1 | S03 |
| .....ugaaaagugguacuaugaauugugu.....     | 28  | 0 | S03 |
| .....ugaaaagugguacuaugaauuguAu.....     | 1   | 1 | S03 |
| .....ugaaaagugguacuaugaauuGGu.....      | 1   | 1 | S03 |
| .....ugaaaagugguacuaugaauuGgu.....      | 1   | 1 | S03 |
| .....gaaaagugguacuaugaau.....           | 2   | 0 | S03 |
| .....gaaaagugguacuaugaau.....           | 9   | 0 | S03 |
| .....gaaaagugguacuaugaauug.....         | 18  | 0 | S03 |
| .....gaaaagugguacuaugaUug.....          | 1   | 1 | S03 |
| .....gaaaagugguacuaugaauGGu.....        | 1   | 1 | S03 |
| .....gaaaagugguacuaugaauuGG.....        | 2   | 1 | S03 |
| .....gaaaagugguacuaugaauuGA.....        | 2   | 1 | S03 |
| .....gaaaagugguacuaugaauugu.....        | 45  | 0 | S03 |
| .....gaaaGgugguacuaugaauugu.....        | 1   | 1 | S03 |
| .....gaaaagugguacuaugaauuguU.....       | 4   | 1 | S03 |
| .....gCaaagugguacuaugaauugug.....       | 3   | 1 | S03 |
| .....gaaaagugguacuaugaauugug.....       | 59  | 0 | S03 |
| .....gaaaagugguacuaugaauugugu.....      | 20  | 0 | S03 |
| .....Aaaaagugguacuaugaauugugu.....      | 1   | 1 | S03 |
| .....gaaaagugguacuaugaGugugu.....       | 1   | 1 | S03 |
| .....gaaaagugguacuaugaauuGgu.....       | 1   | 1 | S03 |
| .....Naaaagugguacuaugaauugugu.....      | 1   | 1 | S03 |
| .....gaaaagugguacCaugaauugugu.....      | 1   | 1 | S03 |
| .....gaaaagugguacuaugaauuGGu.....       | 1   | 1 | S03 |
| .....Aaaaagugguacuaugaauuguguu.....     | 2   | 1 | S03 |
| .....gaaaagAgguacuaugaauuguguu.....     | 1   | 1 | S03 |
| .....gaaaGgugguacuaugaauuguguu.....     | 1   | 1 | S03 |
| .....gaaaagugguacuaugaGauguguu.....     | 2   | 1 | S03 |
| .....gaaaagugguacCaugaauuguguu.....     | 1   | 1 | S03 |

Mature

Star

| Sequence                            | Count | Count | Category                                                           |
|-------------------------------------|-------|-------|--------------------------------------------------------------------|
| ccuucuuuaaaaauuaggguaaaaauuaguguaaa | caug  | gaaa  | gugguacuaugaauguguuuuuugugguaauuuucuauuacauaggggguuguuuuuuuaucacaa |
| .gaaaagugguacuaugaauguguG.          | 2     | 1     | S03                                                                |
| .gaaaagugguacuaugaauguguC.          | 1     | 1     | S03                                                                |
| .gUaaaagugguacuaugaauguguu.         | 1     | 1     | S03                                                                |
| .gaaaagugguacuaugaauguguu.          | 26    | 0     | S03                                                                |
| .gaaaagugguacuaugaauguguua.         | 1     | 0     | S03                                                                |
| .aaaagugguacuaugaa.                 | 1     | 0     | S03                                                                |
| .aaaagugguacuaugaaug.               | 1     | 0     | S03                                                                |
| .aaaagugguacuaugaaugA.              | 1     | 1     | S03                                                                |
| .aaaagugguacuaugaaugu.              | 18    | 0     | S03                                                                |
| .aaaagugguacuaugaaugG.              | 1     | 1     | S03                                                                |
| .aaaagugguacuaugaaugug.             | 50    | 0     | S03                                                                |
| .aGaaagugguacuaugaaugug.            | 1     | 1     | S03                                                                |
| .Caaagugguacuaugaaugug.             | 2     | 1     | S03                                                                |
| .aaaagugguacuaugaauguU.             | 6     | 1     | S03                                                                |
| .aaaagugguacuaugaauguUu.            | 2     | 1     | S03                                                                |
| .aaaagugguacuaugaaugugu.            | 25    | 0     | S03                                                                |
| .aaaagugguaAuaugaaugugu.            | 1     | 1     | S03                                                                |
| .aaaagugguacCaugaaugugu.            | 1     | 1     | S03                                                                |
| .Caaagugguacuaugaaugugu.            | 1     | 1     | S03                                                                |
| .aaaaguggAacuaugaaugugu.            | 1     | 1     | S03                                                                |
| .aaaagugguacuaugaauguguu.           | 7     | 0     | S03                                                                |
| .aaaagugguacuaugaauguguC.           | 2     | 1     | S03                                                                |
| .aaaagugguacuaugaauguguA.           | 1     | 1     | S03                                                                |
| .aaaagugguacCaugaauguguu.           | 1     | 1     | S03                                                                |
| .aaaagugguacuaugaauguguua.          | 3     | 0     | S03                                                                |
| .aaagugguacuaugaaugu.               | 8     | 0     | S03                                                                |
| .aaagugguacuaugaaugug.              | 16    | 0     | S03                                                                |
| .aaagugguacuaugaaugugu.             | 11    | 0     | S03                                                                |
| .aaagugguacuaugaauguguu.            | 7     | 0     | S03                                                                |
| .aaagugguacuaugaauguguC.            | 2     | 1     | S03                                                                |
| .aaagugguacuaugaauguguuG.           | 2     | 1     | S03                                                                |
| .aaagugguacuaAaauguguua.            | 1     | 1     | S03                                                                |
| .aaagugguacuaugaauguguuU.           | 3     | 1     | S03                                                                |
| .aaagugguacuaugaauguguua.           | 7     | 0     | S03                                                                |
| .aaagugguacuaugaauguguuaa.          | 9     | 0     | S03                                                                |
| .aaagugguacuaugaauguguuaC.          | 4     | 1     | S03                                                                |
| .aaagugguacuaugaauguguuaA.          | 2     | 1     | S03                                                                |
| .aagugguacuaugaaugu.                | 4     | 0     | S03                                                                |
| .aagugguacuaugaaugA.                | 1     | 1     | S03                                                                |
| .aagugguacuaugaaugug.               | 5     | 0     | S03                                                                |
| .aagugguacuaugaaugugu.              | 5     | 0     | S03                                                                |
| .aagugguacuaugaauguAa.              | 1     | 1     | S03                                                                |
| .aagugguacuaugGaugugu.              | 1     | 1     | S03                                                                |
| .aagugguacuaugaauguguC.             | 1     | 1     | S03                                                                |
| .aagugguaAuaugaauguguu.             | 1     | 1     | S03                                                                |
| .aagugguacuaugaauguguu.             | 5     | 0     | S03                                                                |
| .aagugguacuaugaauguguua.            | 1     | 0     | S03                                                                |
| .aagugguaAuaugaauguguua.            | 1     | 1     | S03                                                                |
| .aagugguacuaugaauguguuaA.           | 1     | 1     | S03                                                                |
| .aagugguacuaugaauguguuaa.           | 4     | 0     | S03                                                                |
| .aagugguacuaugaauguguuaA.           | 11    | 1     | S03                                                                |
| .aagugguacuaugaauguguuaau.          | 5     | 0     | S03                                                                |
| .aagugguaAuaugaauguguuaau.          | 1     | 1     | S03                                                                |
| .agugguacuaugaaugug.                | 6     | 0     | S03                                                                |
| .agugguacuaugaaugugu.               | 10    | 0     | S03                                                                |
| .agugguacuaugaauguguu.              | 7     | 0     | S03                                                                |
| .agugguacuaugaauguguG.              | 1     | 1     | S03                                                                |
| .agugguacuaugGauguguua.             | 1     | 1     | S03                                                                |
| .agugguacuaAaauguguua.              | 1     | 1     | S03                                                                |
| .agugguacuaugaauguguua.             | 6     | 0     | S03                                                                |
| .agugguacuaugaauguguuaC.            | 1     | 1     | S03                                                                |
| .agugguacuaugaauguguuaA.            | 11    | 1     | S03                                                                |
| .agugguacuaugaauguguuUuu.           | 1     | 1     | S03                                                                |
| .agugguacuaugaauguguuaaG.           | 2     | 1     | S03                                                                |
| .agugguacuaugaauguguuaAa.           | 13    | 1     | S03                                                                |
| .agugguacuaugaauguguuaauu.          | 1     | 0     | S03                                                                |
| .agugguacuaugaauguguuaaAug.         | 1     | 1     | S03                                                                |
| .gugguacuaugaaugugu.                | 2     | 0     | S03                                                                |
| .gugguacuaugaauguguu.               | 1     | 0     | S03                                                                |
| .gugguacuaugaauguguuaau.            | 1     | 0     | S03                                                                |

Mature

Star

|                                     |                                                                              |    |   |     |
|-------------------------------------|------------------------------------------------------------------------------|----|---|-----|
| ccuucuuuaaaaauuaggguaaaauuuaguguaaa | caugaaaaagugguacuaugaauuguguuuuuugugguauuuucucuuuacauaggggguuguuuuuuuuacacaa |    |   |     |
| .....gugguacuaugaauuguguuauAug      | .....                                                                        | 11 | 1 | S03 |
| .....ugguacuaugaauuguguu            | .....                                                                        | 1  | 0 | S03 |
| .....ugguacuaugaauuguguuauA         | .....                                                                        | 1  | 1 | S03 |
| .....ugguacuaugaauuguguuauCug       | .....                                                                        | 3  | 1 | S03 |
| .....ugguacuaugaauuguguuauAug       | .....                                                                        | 6  | 1 | S03 |
| .....ugguacuaugaauuguguuauCugu      | .....                                                                        | 26 | 1 | S03 |
| .....ugguacuaugaauuguguuauAugu      | .....                                                                        | 9  | 1 | S03 |
| .....guacuaugaauuguguuauCug         | .....                                                                        | 2  | 1 | S03 |
| .....guacuaugaauuguguuauCugu        | .....                                                                        | 3  | 1 | S03 |
| .....guacuaugaauuguguuauCugg        | .....                                                                        | 3  | 1 | S03 |
| .....uacuaugaauuguguuauCug          | .....                                                                        | 1  | 1 | S03 |
| .....uacuaugaauuguguuauCugg         | .....                                                                        | 2  | 1 | S03 |
| .....uacuaugaauuguguuauAugugg       | .....                                                                        | 1  | 1 | S03 |
| .....uacuaugaauuguguuauCuggggu      | .....                                                                        | 2  | 1 | S03 |
| .....acuugaauuguguuauCuggg          | .....                                                                        | 8  | 1 | S03 |
| .....cuugaauuguguuauCuggg           | .....                                                                        | 1  | 1 | S03 |
| .....uugaauuguguuauAugugggu         | .....                                                                        | 3  | 1 | S03 |
| .....uugaauuguguuauCuggggu          | .....                                                                        | 1  | 1 | S03 |
| .....augaauuguguuauCugg             | .....                                                                        | 1  | 1 | S03 |
| .....augaauuguguuauCuggg            | .....                                                                        | 1  | 1 | S03 |
| .....augaauuguguuauAugugggu         | .....                                                                        | 1  | 1 | S03 |
| .....ugaauuguguuauAugugggu          | .....                                                                        | 1  | 1 | S03 |
| .....augugCuauuugugguauuuucu        | .....                                                                        | 1  | 1 | S03 |
| .....Gaggguaaaaauuuaguguaaac        | .....                                                                        | 1  | 1 | S04 |
| .....aggguaaaaauuuagugua            | .....                                                                        | 1  | 0 | S04 |
| .....gguaaaaauuuaguguaaacaug        | .....                                                                        | 1  | 0 | S04 |
| .....Aaaaauuuaguguaaacaugaa         | .....                                                                        | 1  | 1 | S04 |
| .....aaaauuuaguguaaacaugaaG         | .....                                                                        | 2  | 1 | S04 |
| .....aaauuuuaguguaaacauga           | .....                                                                        | 1  | 0 | S04 |
| .....uuuaguguaaacaugaaaaUugg        | .....                                                                        | 1  | 1 | S04 |
| .....uuuaguguaaacaugaaaaguggu       | .....                                                                        | 1  | 0 | S04 |
| .....uuaguguaaacaugaaaagug          | .....                                                                        | 2  | 0 | S04 |
| .....uuaguguaaacaugaaaagugg         | .....                                                                        | 9  | 0 | S04 |
| .....uuaguguaaacaugaaaaguggu        | .....                                                                        | 3  | 0 | S04 |
| .....uuaguguaaacaugaaaaguggua       | .....                                                                        | 2  | 0 | S04 |
| .....uaguguaaacaugaaaagu            | .....                                                                        | 2  | 0 | S04 |
| .....uaguguaaacaugaaaagugg          | .....                                                                        | 3  | 0 | S04 |
| .....uaguguaaacaugaaaaguggu         | .....                                                                        | 9  | 0 | S04 |
| .....uaguguaaacaugaaaaguggG         | .....                                                                        | 1  | 1 | S04 |
| .....uaguguaaacaugaaaaguggua        | .....                                                                        | 20 | 0 | S04 |
| .....uaguguaaacaugaaaagugguG        | .....                                                                        | 1  | 1 | S04 |
| .....uaguguaaacaugaaaagugguac       | .....                                                                        | 3  | 0 | S04 |
| .....aguguaaacaugaaaagug            | .....                                                                        | 1  | 0 | S04 |
| .....guguaaacaugaaaaguggu           | .....                                                                        | 1  | 0 | S04 |
| .....uaaacaugaaaagugguacua          | .....                                                                        | 1  | 0 | S04 |
| .....uaaacaugaaaagugguacuaug        | .....                                                                        | 5  | 0 | S04 |
| .....uaaacaugCaaagugguacuaug        | .....                                                                        | 2  | 1 | S04 |
| .....uaaacaugaGaaagugguacuaug       | .....                                                                        | 1  | 1 | S04 |
| .....uaaacaugCaaagugguacuauga       | .....                                                                        | 2  | 1 | S04 |
| .....uaaacaugaaaagugguacuauga       | .....                                                                        | 10 | 0 | S04 |
| .....Aaaacaugaaaagugguacuauga       | .....                                                                        | 3  | 1 | S04 |
| .....uaaacaugaGaaagugguacuauga      | .....                                                                        | 1  | 1 | S04 |
| .....aaacaugaaaagugguacua           | .....                                                                        | 1  | 1 | S04 |
| .....aaacaugaaaagugguacua           | .....                                                                        | 1  | 0 | S04 |
| .....aaacaugaaaagugguacuaug         | .....                                                                        | 5  | 0 | S04 |
| .....aaacaugCaaagugguacuaug         | .....                                                                        | 2  | 1 | S04 |
| .....aaacaugaaaagugguacuauga        | .....                                                                        | 13 | 0 | S04 |
| .....aaacaugCaaagugguacuauga        | .....                                                                        | 1  | 1 | S04 |
| .....aaacaugCaaagugguacuaugaa       | .....                                                                        | 4  | 1 | S04 |
| .....aaacaugaaaagugguacuaugaU       | .....                                                                        | 2  | 1 | S04 |
| .....aaacaugaaaagugguacuaugaa       | .....                                                                        | 38 | 0 | S04 |
| .....aaacaugaaaagugguacuaugaau      | .....                                                                        | 1  | 0 | S04 |
| .....aaacaugaaaagugguacuaugaaA      | .....                                                                        | 1  | 1 | S04 |
| .....aaacaugCaaagugguacuaugaau      | .....                                                                        | 2  | 1 | S04 |
| .....aaacugaaaagugguacuaugaauCu     | .....                                                                        | 1  | 1 | S04 |
| .....aaacugCaaagugguacuaug          | .....                                                                        | 1  | 1 | S04 |
| .....aaacugaaaagugguacuaug          | .....                                                                        | 3  | 0 | S04 |
| .....aaacugaaaagugguacuauga         | .....                                                                        | 20 | 0 | S04 |

Mature

Star

ccuucuuuaaaaauuaggguaaaaauuaguguaaa**caug**aaaaagugguacuaugaauguguauuuugugguauuucucuuacauaggggguuguuuuuuuuacacaa

|                                     |      |   |     |
|-------------------------------------|------|---|-----|
| .....aacugCaaagugguacuauga.....     | 2    | 1 | S04 |
| .....aacugaaaagugguacuaugaa.....    | 10   | 0 | S04 |
| .....aacugaaaagugguacuaugaaG.....   | 3    | 1 | S04 |
| .....aacugaaaagugguacuaugaaC.....   | 12   | 1 | S04 |
| .....aacugaaaagGgguaucuaugaa.....   | 1    | 1 | S04 |
| .....aacugaaaagugguacuaugaaA.....   | 2    | 1 | S04 |
| .....aacugaaaagugguacuaugaG.....    | 1    | 1 | S04 |
| .....Nacugaaaagugguacuaugaa.....    | 1    | 1 | S04 |
| .....aacugaaaagugguacuaugaa.....    | 133  | 0 | S04 |
| .....aUcugaaaagugguacuaugaa.....    | 1    | 1 | S04 |
| .....aacugaaaGgugguacuaugaa.....    | 1    | 1 | S04 |
| .....aacugCaaagugguacuaugaa.....    | 10   | 1 | S04 |
| .....Cacugaaaagugguacuaugaaug.....  | 1    | 1 | S04 |
| .....aacugaaaagugguacuaugaaug.....  | 1    | 0 | S04 |
| .....acugCaaagugguacuaug.....       | 2    | 1 | S04 |
| .....acugaaaagugguacuauga.....      | 4    | 0 | S04 |
| .....acugaaaagGgguaucuauga.....     | 1    | 1 | S04 |
| .....acugCaaagugguacuauga.....      | 2    | 1 | S04 |
| .....acugCaaagugguacuaugaa.....     | 1    | 1 | S04 |
| .....acugaaaagugguacuaugaa.....     | 3    | 0 | S04 |
| .....acugaaaagugguacuaugaa.....     | 9    | 0 | S04 |
| .....acugCaaagugguacuaugaa.....     | 1    | 1 | S04 |
| .....aAaugaaaagugguacuaugaaug.....  | 2    | 1 | S04 |
| .....acugCaaagugguacuaugaaug.....   | 4    | 1 | S04 |
| .....acugaaaagugguacuaugaaug.....   | 94   | 0 | S04 |
| .....acugaaaagugguacuaugaUug.....   | 3    | 1 | S04 |
| .....acugaaaagGgguaucuaugaaug.....  | 1    | 1 | S04 |
| .....cugaaaagugguacuaug.....        | 3    | 0 | S04 |
| .....cugCaaagugguacuaug.....        | 2    | 1 | S04 |
| .....cugCaaagugguacuauga.....       | 1    | 1 | S04 |
| .....cugaaaagugguacuauga.....       | 5    | 0 | S04 |
| .....cugCaaagugguacuaugaa.....      | 1    | 1 | S04 |
| .....cugaaaagugguacuaugaG.....      | 1    | 1 | S04 |
| .....cugaaaagugguacuaugaa.....      | 7    | 0 | S04 |
| .....cugCaaagugguacuaugaa.....      | 9    | 1 | S04 |
| .....cugaaaagugguacuaugaaC.....     | 6    | 1 | S04 |
| .....caGaaaagugguacuaugaa.....      | 1    | 1 | S04 |
| .....cugaaaagugguacuaugaaG.....     | 3    | 1 | S04 |
| .....cugaaaagugguacuaugaa.....      | 42   | 0 | S04 |
| .....caGaaaagugguacuaugaaug.....    | 1    | 1 | S04 |
| .....cugCaaagugguacuaugaaug.....    | 7    | 1 | S04 |
| .....cugaaaagugguacuaugaaug.....    | 50   | 0 | S04 |
| .....cugaGaaagugguacuaugaaugu.....  | 2    | 1 | S04 |
| .....cugaaaagugguacuaGgaaugu.....   | 1    | 1 | S04 |
| .....cugaaaagugguacuaugaaugA.....   | 44   | 1 | S04 |
| .....cugaaaagugguacuaugaaCgu.....   | 1    | 1 | S04 |
| .....cugaaaagugguacuaugaaugG.....   | 71   | 1 | S04 |
| .....cugaaaagugguGcuaugaaugu.....   | 3    | 1 | S04 |
| .....cugaaaagugguacuaugaaCu.....    | 2    | 1 | S04 |
| .....cugaaaagGgguaucuaugaaugu.....  | 4    | 1 | S04 |
| .....caGaaaagugguacuaugaaugu.....   | 5    | 1 | S04 |
| .....cugaaCagugguacuaugaaugu.....   | 2    | 1 | S04 |
| .....cugaaaagugguacuaugaUugu.....   | 1    | 1 | S04 |
| .....cugaaaagugguacuaugaGugu.....   | 4    | 1 | S04 |
| .....cugaaaagugguacuaugaaugu.....   | 1508 | 0 | S04 |
| .....cugCaaagugguacuaugaaugu.....   | 78   | 1 | S04 |
| .....cugaaaagugguacuaugUaugu.....   | 1    | 1 | S04 |
| .....cugaaaGgugguacuaugaaugu.....   | 7    | 1 | S04 |
| .....Naugaaaagugguacuaugaaugu.....  | 4    | 1 | S04 |
| .....cugaaaGgugguacuaugaaugug.....  | 1    | 1 | S04 |
| .....cugaaaagugguacuaugaauguU.....  | 4    | 1 | S04 |
| .....cugaaaagugguacuaugaaugug.....  | 45   | 0 | S04 |
| .....cugaaaagugguacCaugaaugugu..... | 1    | 1 | S04 |
| .....cugaaaagugguacuaugaaugugu..... | 2    | 0 | S04 |
| .....cugaaaagugguacuaugaauguUu..... | 1    | 1 | S04 |
| .....augaaaagugguacuaug.....        | 1    | 0 | S04 |
| .....augaaaagugguacuauga.....       | 4    | 0 | S04 |
| .....augaaaagugguacuaugaa.....      | 1    | 0 | S04 |
| .....augCaaagugguacuaugaa.....      | 2    | 1 | S04 |
| .....augaaaagugguacuaugaa.....      | 14   | 0 | S04 |

Mature

Star

ccuucuuuaaaaauuaggguaaaaauuuaguguaaacaugaaaaagugguacuaugaauguguauuuugugguaauuuucuauuacauagggggguuguuuuuuuuauacaaa

|                                      |     |   |     |
|--------------------------------------|-----|---|-----|
| .....augCaaagugguacuaugaaug.....     | 4   | 1 | S04 |
| .....augaaaagugguacuaugaaug.....     | 17  | 0 | S04 |
| .....augaaaagugguacuaugaauC.....     | 1   | 1 | S04 |
| .....augaaaagugguacuaugaaugA.....    | 1   | 1 | S04 |
| .....augaaaagugguacuaugaaugu.....    | 57  | 0 | S04 |
| .....augCaaagugguacuaugaaugu.....    | 9   | 1 | S04 |
| .....augaaaagugguacuaugaaugG.....    | 3   | 1 | S04 |
| .....augaaaGgugguacuaugaaugug.....   | 4   | 1 | S04 |
| .....augaaaaguggGacuaugaaugug.....   | 1   | 1 | S04 |
| .....augaGaaagugguacuaugaaugug.....  | 3   | 1 | S04 |
| .....augaaaagugguacuaugaaugug.....   | 597 | 0 | S04 |
| .....augaaaagugguacuaugaaugAg.....   | 1   | 1 | S04 |
| .....aGaaaagugguacuaugaaugug.....    | 1   | 1 | S04 |
| .....augaaaagugguacuaAgaaugug.....   | 1   | 1 | S04 |
| .....augaaaagugguacuaugaGugug.....   | 1   | 1 | S04 |
| .....augaaaagugguacuaugaaugGg.....   | 1   | 1 | S04 |
| .....augaaaagugguacuaugaauguU.....   | 7   | 1 | S04 |
| .....augCaaagugguacuaugaaugug.....   | 79  | 1 | S04 |
| .....augaaaagugguGcuaugaaugug.....   | 1   | 1 | S04 |
| .....augaaaagugguacuaugaaugugu.....  | 3   | 0 | S04 |
| .....augaaaagugguacuaCgaaugugu.....  | 1   | 1 | S04 |
| .....auAaaaagugguacuaugaaugugu.....  | 1   | 1 | S04 |
| .....augCaaagugguacuaugaaugugu.....  | 2   | 1 | S04 |
| .....augaaaagugguacuaugaauguguu..... | 1   | 0 | S04 |
| .....ugCaaagugguacuaugaa.....        | 1   | 1 | S04 |
| .....ugaaaagugguacuaugaaG.....       | 1   | 1 | S04 |
| .....ugaaaagugguacuaugaaU.....       | 3   | 0 | S04 |
| .....ugaGaaagugguacuaugaaug.....     | 1   | 1 | S04 |
| .....ugaaaagugguacuaugaaug.....      | 14  | 0 | S04 |
| .....ugaaaagugguacuaugaaugu.....     | 75  | 0 | S04 |
| .....ugaaaagugguacuaugaaugG.....     | 1   | 1 | S04 |
| .....ugaGaaagugguacuaugaaugu.....    | 1   | 1 | S04 |
| .....ugaaaagugguacuaugaaugA.....     | 9   | 1 | S04 |
| .....ugCaaagugguacuaugaaugu.....     | 4   | 1 | S04 |
| .....ugaaaagugguacuaugaauguU.....    | 4   | 1 | S04 |
| .....ugaaaaguggGacuaugaaugug.....    | 1   | 1 | S04 |
| .....ugaaaGgugguacuaugaaugug.....    | 1   | 1 | S04 |
| .....ugCaaagugguacuaugaaugug.....    | 9   | 1 | S04 |
| .....ugaaaagugguacuaugaaugug.....    | 70  | 0 | S04 |
| .....ugaaaagugguacuaugaGugug.....    | 2   | 1 | S04 |
| .....ugaaaagugguacuaugaaugGg.....    | 1   | 1 | S04 |
| .....ugCaaagugguacuaugaaugugu.....   | 5   | 1 | S04 |
| .....ugaaaGgugguacuaugaaugugu.....   | 1   | 1 | S04 |
| .....ugaaaagugguacuaugaauguA.....    | 1   | 1 | S04 |
| .....ugaaaCugguacuaugaaugugu.....    | 1   | 1 | S04 |
| .....ugaaaagugguacuaugaaugugu.....   | 13  | 0 | S04 |
| .....gaaaagugguacuaugaa.....         | 2   | 0 | S04 |
| .....gaaaagugguacuaugaaU.....        | 2   | 0 | S04 |
| .....gaaaagugguacuaugaaG.....        | 1   | 1 | S04 |
| .....gaaaagugguacuaugaaug.....       | 13  | 0 | S04 |
| .....gaaaagugguacuaugaaugG.....      | 3   | 1 | S04 |
| .....gCaaagugguacuaugaaugu.....      | 3   | 1 | S04 |
| .....gaaaagugguacuaugaaugu.....      | 46  | 0 | S04 |
| .....gaaaagugguacuaugaaugA.....      | 3   | 1 | S04 |
| .....gaaaagugguacuaugaauguU.....     | 3   | 1 | S04 |
| .....gCaaagugguacuaugaaugug.....     | 8   | 1 | S04 |
| .....gaaaagugguacuaugaGugug.....     | 1   | 1 | S04 |
| .....gaaaagugguacuaugaaugug.....     | 72  | 0 | S04 |
| .....gaaaagugguacuaugaaugugu.....    | 9   | 0 | S04 |
| .....gaaaagugguacuaugaauguU.....     | 1   | 1 | S04 |
| .....gGaaaagugguacuaugaaugugu.....   | 1   | 1 | S04 |
| .....gCaaagugguacuaugaaugugu.....    | 1   | 1 | S04 |
| .....gaaaagugguacuaugaaugugu.....    | 1   | 0 | S04 |
| .....aaaagugguacuaugaa.....          | 2   | 0 | S04 |
| .....aaaagugguacuaugaaug.....        | 1   | 0 | S04 |
| .....aaaagugguacuaugaaugG.....       | 3   | 1 | S04 |
| .....aaaagugguacuaugaaugu.....       | 12  | 0 | S04 |
| .....aaaagugguacuaugaauguU.....      | 3   | 1 | S04 |
| .....Naaaagugguacuaugaaugug.....     | 1   | 1 | S04 |
| .....Caaagugguacuaugaaugug.....      | 4   | 1 | S04 |



Mature

Star

| Sequence                            | Count | Score | Category |
|-------------------------------------|-------|-------|----------|
| ccuucuuuaaaaauuaggguaaaaauuaguguaaa | 39    | 0     | S04      |
| .....aaaagugguacuugaauugug.....     | 8     | 0     | S04      |
| .....aaaagugguacuugaauugugu.....    | 4     | 1     | S04      |
| .....Caaagugguacuugaauugugu.....    | 2     | 1     | S04      |
| .....aaaagugguaAuaugaauugugu.....   | 1     | 1     | S04      |
| .....Gaaagugguacuugaauugugu.....    | 2     | 1     | S04      |
| .....aaaagugguaAuaugaauugugu.....   | 2     | 0     | S04      |
| .....aaaagugguacuugaauugugu.....    | 1     | 1     | S04      |
| .....aaaagugguaAuaugaauuguguua..... | 1     | 0     | S04      |
| .....aaagugguacuugaauug.....        | 7     | 0     | S04      |
| .....aaagugguacuugaauugu.....       | 1     | 1     | S04      |
| .....aaagugguacuugaauugug.....      | 5     | 0     | S04      |
| .....aaagugguacCugaauugugu.....     | 1     | 1     | S04      |
| .....aaagugguaAuaugaauugugu.....    | 2     | 1     | S04      |
| .....aaagugguacuugaauugugu.....     | 6     | 0     | S04      |
| .....aaagugguacuugaauuguA.....      | 2     | 1     | S04      |
| .....aaagugguacuugaauuguguA.....    | 1     | 1     | S04      |
| .....aaagugguacuugaauugugu.....     | 1     | 0     | S04      |
| .....aaagugguacuugaauuguguu.....    | 1     | 1     | S04      |
| .....aaagugguacuugaauuguguuG.....   | 2     | 1     | S04      |
| .....aaagugguacuugaauuguguuu.....   | 2     | 0     | S04      |
| .....aaagugguacuugaauuguguuuG.....  | 1     | 1     | S04      |
| .....aagugguacuugaauugu.....        | 3     | 0     | S04      |
| .....aagugguacuugaauugA.....        | 1     | 1     | S04      |
| .....aagugguacuugaauugug.....       | 1     | 0     | S04      |
| .....aagugguacuugaauugugu.....      | 1     | 0     | S04      |
| .....aagugguaAuaugaauugugu.....     | 2     | 1     | S04      |
| .....aagugguacuugaauuguguA.....     | 1     | 1     | S04      |
| .....aagugguaAuaugaauugugu.....     | 1     | 1     | S04      |
| .....aagugguacuugaauugugu.....      | 1     | 0     | S04      |
| .....aagugguacuugaauuguguuu.....    | 2     | 1     | S04      |
| .....aagugguacuugaauuguguuuuu.....  | 1     | 0     | S04      |
| .....agugguacuugaauugug.....        | 4     | 0     | S04      |
| .....agugguaAuaugaauugugu.....      | 1     | 1     | S04      |
| .....agugguacuugaauugugu.....       | 4     | 0     | S04      |
| .....agugguacuugaauuguguuuA.....    | 2     | 1     | S04      |
| .....agugguacuugaauuguguuuuu.....   | 1     | 0     | S04      |
| .....gugguacuugaauugugu.....        | 1     | 0     | S04      |
| .....gugguacuCugaauuguguuuuuug..... | 1     | 1     | S04      |
| .....ugguacuugaauuguguuuuuCugu..... | 1     | 1     | S04      |
| .....ugguacuugaauuguguuuuuugu.....  | 1     | 0     | S04      |
| .....gguacuCugaauuguguuuuuugu.....  | 1     | 1     | S04      |
| .....guaAuaugaauuguguuuuuugugg..... | 1     | 1     | S04      |
| .....uacuugaauuguguuuuuCugugg.....  | 1     | 1     | S04      |
| .....aauguguuuuuuguggCaauuucu.....  | 1     | 1     | S04      |
| .....uuuguggCaauuucuauuaca.....     | 1     | 1     | S04      |





**Star**

**Mature**

aagaaaagcugcuaagcuaugaaucccauaagcccuuaucuuacauuaaaaaggauuugguuauagggcuuacauaucucaggagcuuuuacuugccuuuaauugcu

.....cuuacauaucucaggagcuuuu..... 4 0 S04  
.....uuacauaucucaggagcuuu..... 1 0 S04



Provisional ID : chrA07\_642024  
 Score total : 112.7  
 Score for star read(s) : 3.9  
 Score for read counts : 107.7  
 Score for mfe : 1.1  
 Score for randfold : 0  
 Score for cons. seed :  
 Total read count : 223  
 Mature read count : 130  
 Loop read count : 92  
 Star read count : 1

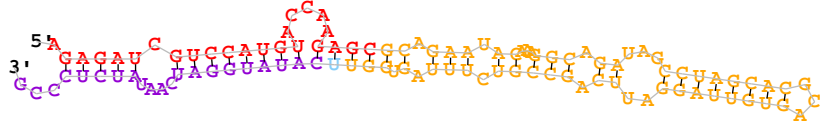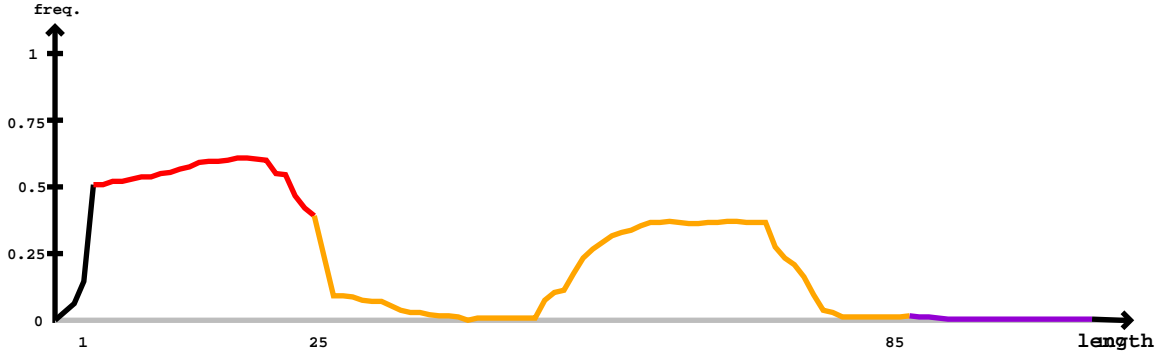

Mature

Star

| 5'                                                                                                                    | 3'  | obs exp | reads | mm | sample |
|-----------------------------------------------------------------------------------------------------------------------|-----|---------|-------|----|--------|
| ucagagaucguccauguaccaagagcgcagaaaucaaaggcagauagccuagcacgcaguguuaggauucagccgucuuuagucguucaauuggaucaauaucuccgggu        | -3' | obs exp |       |    |        |
| ucagagaucguccauguaccaagagcgcagaaaucaaaggcagauagccuagcacgcaguguuaggauucagccgucuuuagucguucaauuggaucaauaucuccgggu        |     |         |       |    |        |
| ...(((((((.....(((((((.....)))))))))))....)))))))))).....)))))))))).....)))))))))).....)))))))))).....))))))))))..... |     |         |       |    |        |
| ucagCgauuguccauguac.....                                                                                              |     |         | 1     | 1  | S03    |
| ucagagaucguccauguacc.....                                                                                             |     |         | 1     | 0  | S03    |
| ucagagaucguccauguacca.....                                                                                            |     |         | 1     | 0  | S03    |
| ucaCagauuguccauguaccaa.....                                                                                           |     |         | 1     | 1  | S03    |
| ucagagaucguccaugGaccaag.....                                                                                          |     |         | 1     | 1  | S03    |
| ucagagaucguccauguaccaaga.....                                                                                         |     |         | 5     | 0  | S03    |
| ucagagaucguccauguaccaagG.....                                                                                         |     |         | 1     | 1  | S03    |
| .cagagaucguccauguaccU.....                                                                                            |     |         | 1     | 1  | S03    |
| .cagagaucguccGuguacca.....                                                                                            |     |         | 1     | 1  | S03    |
| .cagagaucguccauguacca.....                                                                                            |     |         | 6     | 0  | S03    |
| .cagagaucguccauguaccaUg.....                                                                                          |     |         | 1     | 1  | S03    |
| .cagagaucguccauguaccaag.....                                                                                          |     |         | 6     | 0  | S03    |
| .Gagagaucguccauguaccaagag.....                                                                                        |     |         | 1     | 1  | S03    |
| .cagagaucgCccauguaccaagag.....                                                                                        |     |         | 1     | 1  | S03    |
| .cagagaucguccauguaccaagag.....                                                                                        |     |         | 3     | 0  | S03    |
| .agagaucguccauguacca.....                                                                                             |     |         | 3     | 0  | S03    |
| .agagaucguccauguaccaag.....                                                                                           |     |         | 10    | 0  | S03    |
| .agagacGguccauguaccaag.....                                                                                           |     |         | 1     | 1  | S03    |
| .agagaucguccauguaccaaga.....                                                                                          |     |         | 1     | 0  | S03    |
| .agagaucguccauguaccaagag.....                                                                                         |     |         | 1     | 0  | S03    |
| .agagaucguccauguaccUaagag.....                                                                                        |     |         | 1     | 1  | S03    |
| .agagaucguccauguaccaagagU.....                                                                                        |     |         | 15    | 1  | S03    |
| .agagaucguccauguaccaagaUC.....                                                                                        |     |         | 1     | 1  | S03    |
| .agagaucguccauguaccaagagG.....                                                                                        |     |         | 1     | 1  | S03    |
| .agagaucguccauguaccaagagc.....                                                                                        |     |         | 39    | 0  | S03    |
| .agagaucguccauguaccaagagA.....                                                                                        |     |         | 3     | 1  | S03    |
| .Ggagaucguccauguaccaagagc.....                                                                                        |     |         | 3     | 1  | S03    |
| .agagauUguccauguaccaagagc.....                                                                                        |     |         | 1     | 1  | S03    |
| .agGgaucguccauguaccaagagc.....                                                                                        |     |         | 1     | 1  | S03    |
| ...agaucguccauguaccaagagc.....                                                                                        |     |         | 3     | 0  | S03    |
| .....aucguccauguaccaagagcgca.....                                                                                     |     |         | 1     | 0  | S03    |
| .....aucguccauguaccaagagcgag.....                                                                                     |     |         | 1     | 0  | S03    |
| .....ucguccauguaccaagagcgag.....                                                                                      |     |         | 1     | 0  | S03    |







Provisional ID : chrA07\_648408  
 Score total : 0.6  
 Score for star read(s) : -1.3  
 Score for read counts : 0  
 Score for mfe : 1.9  
 Score for randfold : 0  
 Score for cons. seed :  
 Total read count : 35  
 Mature read count : 35  
 Loop read count : 0  
 Star read count : 0

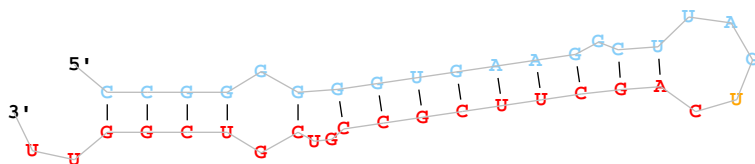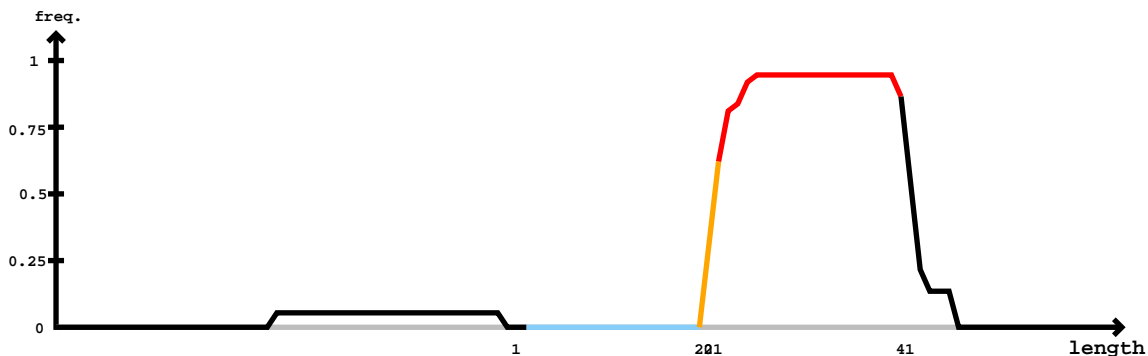

Star                      Mature

| 5' -                                        | Star                             | Mature                             | -3'                   | exp | reads | mm | sample |
|---------------------------------------------|----------------------------------|------------------------------------|-----------------------|-----|-------|----|--------|
| ccgggagguggagguacuacagcuccaucgcccgucgugucuc | ccgggggugaaggcuuag               | ucagcuucgcccugucgguu               | cuguaucggggugcgaagggg |     | 1     | 0  | S03    |
| .....aguccaucgcccgucgugu.....               | .....ucagcuAcgccgucgucggu.....   | .....ucagcuAcgccgucgucggu.....     |                       |     | 1     | 1  | S03    |
| .....                                       | .....ucagcuAcgccgucgucgguuc..... | .....cagcuAcgccgucgucggu.....      |                       |     | 5     | 1  | S03    |
| .....                                       | .....cagcuAcgccgucgucggu.....    | .....cagcuAcgccgucgucggu.....      |                       |     | 3     | 1  | S03    |
| .....                                       | .....agcuAcgccgucgucggu.....     | .....agcuAcgccgucgucgguucgua.....  |                       |     | 1     | 1  | S03    |
| .....                                       | .....aguccaucgcccgucgugC.....    | .....ucagcuucgccgucgucgguU.....    |                       |     | 1     | 1  | S04    |
| .....                                       | .....cagcuucgccgucgucggu.....    | .....cagcuAcgccgucgucggu.....      |                       |     | 1     | 0  | S04    |
| .....                                       | .....cagcuAcgccgucgucggu.....    | .....cagcuAcgccgucgucgguU.....     |                       |     | 1     | 1  | S04    |
| .....                                       | .....cagcuAcgccgucgucgguuc.....  | .....agcuucgccgucgucggu.....       |                       |     | 1     | 1  | S04    |
| .....                                       | .....agcuucgccgucgucggu.....     | .....agcuucgccgucgucgguucGgua..... |                       |     | 2     | 0  | S04    |
| .....                                       | .....gcuucgccgucgucgguuCA.....   | .....cuucgccgucgucgguuc.....       |                       |     | 1     | 1  | S04    |
| .....                                       | .....cuucgccgucgucgguuc.....     | .....cuucgccgucgucgguucGgua.....   |                       |     | 1     | 0  | S04    |
| .....                                       | .....uucgccgucgucgguucGgua.....  |                                    |                       |     | 2     | 1  | S04    |
| .....                                       | .....uucgccgucgucgguucGgua.....  |                                    |                       |     | 1     | 1  | S04    |





Mature

Star

| Sequence                                                                                                          | Count | Count | Label |
|-------------------------------------------------------------------------------------------------------------------|-------|-------|-------|
| gaguuaugc <u>auggaaggcaaugcagagggcugagagagcaggagagagagcuaagaaacuggaagaauucuuaauuuuuaaacucugcuu</u> caugauaauaacuu |       |       |       |
| ..... <u>auggaaggcaaugcagagggcuga</u> .....                                                                       | 2     | 0     | S04   |
| ..... <u>auggaaggcaaugcagagggcugaA</u> .....                                                                      | 4     | 1     | S04   |
| ..... <u>auggaaggcaaugcagagggcugag</u> .....                                                                      | 44    | 0     | S04   |
| ..... <u>Guggaaggcaaugcagagggcugag</u> .....                                                                      | 1     | 1     | S04   |
| ..... <u>auggaaggcaaugcagagUcugag</u> .....                                                                       | 1     | 1     | S04   |
| ..... <u>auggaaggAcaaugcagagggcugag</u> .....                                                                     | 1     | 1     | S04   |
| ..... <u>auggaaggcaaugcagagggcugaga</u> .....                                                                     | 1     | 0     | S04   |
| ..... <u>auggaaggcaaugcagagggcugagU</u> .....                                                                     | 1     | 1     | S04   |
| ..... <u>auggaaggcaaugcagagggcugagG</u> .....                                                                     | 1     | 1     | S04   |
| ..... <u>auggaaggcaaugcagagggcugagaA</u> .....                                                                    | 1     | 1     | S04   |
| ..... <u>uggaaggcaaugcagagggcug</u> .....                                                                         | 1     | 0     | S04   |
| ..... <u>uggaaggcaaugcagagggcugG</u> .....                                                                        | 1     | 1     | S04   |
| ..... <u>uggaaggcaaugcagagggcuga</u> .....                                                                        | 4     | 0     | S04   |
| ..... <u>uggaaggcaaugcagagggcugag</u> .....                                                                       | 2     | 0     | S04   |
| ..... <u>uggaaggcaaCgcagagggcugaga</u> .....                                                                      | 1     | 1     | S04   |
| ..... <u>Gggaaggcaaugcagagggcugaga</u> .....                                                                      | 1     | 1     | S04   |
| ..... <u>uggaaggcaaugcagagggcugaga</u> .....                                                                      | 15    | 0     | S04   |
| ..... <u>uggaaggcaaugcagagggcugagU</u> .....                                                                      | 1     | 1     | S04   |
| ..... <u>ggaaggcaaugcagagggcugag</u> .....                                                                        | 1     | 0     | S04   |
| ..... <u>ggaaggcaaugcagagggcugaga</u> .....                                                                       | 3     | 0     | S04   |
| ..... <u>ggaaggcaaugcagagggcugagag</u> .....                                                                      | 7     | 0     | S04   |
| ..... <u>ggaaggcaaugcagagggcugagaA</u> .....                                                                      | 2     | 1     | S04   |
| ..... <u>gaaggcaaugcagagggcugag</u> .....                                                                         | 6     | 0     | S04   |
| ..... <u>gaaggcaaugcagagggcugaga</u> .....                                                                        | 3     | 0     | S04   |
| ..... <u>gaaggcaaugcagagggcugagag</u> .....                                                                       | 2     | 0     | S04   |
| ..... <u>gaaggcaaugcagagggcugagaA</u> .....                                                                       | 1     | 1     | S04   |
| ..... <u>gaaggcaaugcaUaggcugagaga</u> .....                                                                       | 1     | 1     | S04   |
| ..... <u>gaaggcaaugcagaCgcugagaga</u> .....                                                                       | 1     | 1     | S04   |
| ..... <u>gaaggcaaugcagagggcugagagG</u> .....                                                                      | 14    | 1     | S04   |
| ..... <u>gaaggcaaugcagagggcugagagC</u> .....                                                                      | 25    | 1     | S04   |
| ..... <u>gaaggcaaugcagagggcugagaga</u> .....                                                                      | 9     | 0     | S04   |
| ..... <u>aggcaaugcagagggcugag</u> .....                                                                           | 3     | 0     | S04   |
| ..... <u>aaggcaaugcagagggcugaga</u> .....                                                                         | 4     | 0     | S04   |
| ..... <u>aaggcaaugcagagggcugagag</u> .....                                                                        | 1     | 0     | S04   |
| ..... <u>aaggcaaugcagagggcugagagG</u> .....                                                                       | 4     | 1     | S04   |
| ..... <u>aaggcaaugcagagggcugagagC</u> .....                                                                       | 3     | 1     | S04   |
| ..... <u>aaggcaaugcagagggcugagaga</u> .....                                                                       | 2     | 0     | S04   |
| ..... <u>Gaggcaaugcagagggcugagaga</u> .....                                                                       | 1     | 1     | S04   |
| ..... <u>aaggcaaugcagagggcugagagag</u> .....                                                                      | 1     | 0     | S04   |
| ..... <u>aaggcaaugcaAaggcugagagag</u> .....                                                                       | 1     | 1     | S04   |
| ..... <u>aggcaaugcagagggcuga</u> .....                                                                            | 2     | 0     | S04   |
| ..... <u>aggcaaugcagagggcugag</u> .....                                                                           | 1     | 0     | S04   |
| ..... <u>aggcaaugcagagggcugaga</u> .....                                                                          | 10    | 0     | S04   |
| ..... <u>aggcaaugcagagggcugagag</u> .....                                                                         | 4     | 0     | S04   |
| ..... <u>aggcaaugcagagggcugagagC</u> .....                                                                        | 9     | 1     | S04   |
| ..... <u>aggcaaugcagagggcugagagG</u> .....                                                                        | 4     | 1     | S04   |
| ..... <u>aggcaaugcagagggcugagaga</u> .....                                                                        | 3     | 0     | S04   |
| ..... <u>aggcaaugcagagggcugagagCg</u> .....                                                                       | 2     | 1     | S04   |
| ..... <u>aggcaaugcagagggcugagagagC</u> .....                                                                      | 1     | 0     | S04   |
| ..... <u>aggcaaugcagagggcugagagagU</u> .....                                                                      | 1     | 1     | S04   |
| ..... <u>ggcaaugcagagggcugaga</u> .....                                                                           | 1     | 0     | S04   |
| ..... <u>ggcaaugcagagggcugagagG</u> .....                                                                         | 1     | 1     | S04   |
| ..... <u>ggcaaugcagagggcugagagC</u> .....                                                                         | 1     | 1     | S04   |
| ..... <u>gcaaugcagagggcugaga</u> .....                                                                            | 1     | 0     | S04   |
| ..... <u>gcaaugcagagggcugagagagC</u> .....                                                                        | 1     | 0     | S04   |
| ..... <u>gcaaugcagagggcugagagagUa</u> .....                                                                       | 1     | 1     | S04   |
| ..... <u>caaugcagagggcugagagC</u> .....                                                                           | 2     | 1     | S04   |
| ..... <u>ugcagagggcugagagagcaggaga</u> .....                                                                      | 1     | 0     | S04   |
| ..... <u>ugcagagggcugagagagcagggaAa</u> .....                                                                     | 1     | 1     | S04   |
| ..... <u>agagggcugagagCgcaggagaga</u> .....                                                                       | 1     | 1     | S04   |
| ..... <u>agagagagcuaagaaacugga</u> .....                                                                          | 1     | 0     | S04   |
| ..... <u>aagaaacuggaagaauucuuu</u> .....                                                                          | 1     | 0     | S04   |
| ..... <u>aucuucuuaauuuUuaacucugcuu</u> .....                                                                      | 2     | 1     | S04   |
| ..... <u>ucuucuuaauuuUuaacucugcuu</u> .....                                                                       | 3     | 1     | S04   |
| ..... <u>cuucuuaauuuUuaacucugcuu</u> .....                                                                        | 3     | 1     | S04   |





Star

Mature

|                                                                                                                                                                                                    |   |   |     |
|----------------------------------------------------------------------------------------------------------------------------------------------------------------------------------------------------|---|---|-----|
| uacuaggcagugaugaugaaaaagauuacc <u>cau</u> caaacuuugagagagauuca <u>cag</u> cu <u>cgu</u> gaugca <u>uac</u> uuuuuuuuuu <u>uac</u> cu <u>gag</u> ccua <u>g</u> uu <u>aug</u> uuuuuu <u>gu</u> ucugcuu |   |   |     |
| .....uacuuuuuuuuuu <u>uac</u> cu <u>gag</u> ccuU.....                                                                                                                                              | 1 | 1 | S04 |
| .....cuuuuuuuuuuu <u>uac</u> cu <u>gag</u> ccu.....                                                                                                                                                | 2 | 0 | S04 |
| .....cuuuuuuuuuuu <u>uac</u> cu <u>gag</u> ccua.....                                                                                                                                               | 2 | 0 | S04 |
| .....uucuuuuuuuuuu <u>uac</u> cu <u>gag</u> ccu.....                                                                                                                                               | 2 | 0 | S04 |
| .....uucuuuuuuuuuu <u>uac</u> cu <u>gag</u> ccua.....                                                                                                                                              | 1 | 0 | S04 |
| .....ucuuuuuuuuuu <u>uac</u> cu <u>gag</u> ccua.....                                                                                                                                               | 1 | 0 | S04 |
| .....ucuuuuuuuuuu <u>uac</u> cu <u>gag</u> ccuU.....                                                                                                                                               | 1 | 1 | S04 |
| .....cuuuuuuuuuuu <u>uac</u> cu <u>gag</u> ccA.....                                                                                                                                                | 1 | 1 | S04 |
| .....cuuuuuuuuuuu <u>uac</u> cu <u>gag</u> ccCa.....                                                                                                                                               | 1 | 1 | S04 |
| .....uuuuuuuuuuuu <u>uac</u> cu <u>gag</u> ccu.....                                                                                                                                                | 1 | 0 | S04 |
| .....uuuuuuuuuuuu <u>uac</u> cu <u>gag</u> ccua.....                                                                                                                                               | 1 | 0 | S04 |
| .....uuuuuuuuuuuu <u>uac</u> cu <u>gag</u> ccAa.....                                                                                                                                               | 1 | 1 | S04 |
| .....uuuuuuuuuuuu <u>uac</u> cu <u>gag</u> ccua.....                                                                                                                                               | 3 | 0 | S04 |











Provisional ID : chrA07\_random\_2743826  
 Score total : 0.4  
 Score for star read(s) : -1.3  
 Score for read counts : 0  
 Score for mfe : 1.7  
 Score for randfold : 0  
 Score for cons. seed :  
 Total read count : 33  
 Mature read count : 33  
 Loop read count : 0  
 Star read count : 0

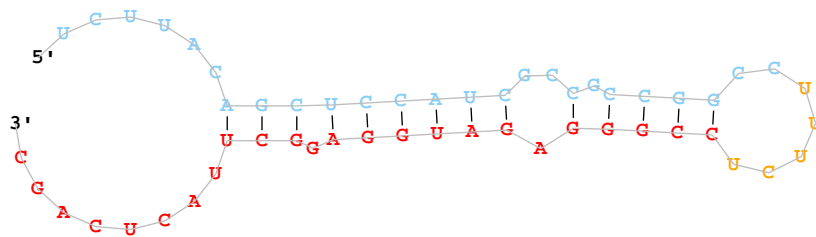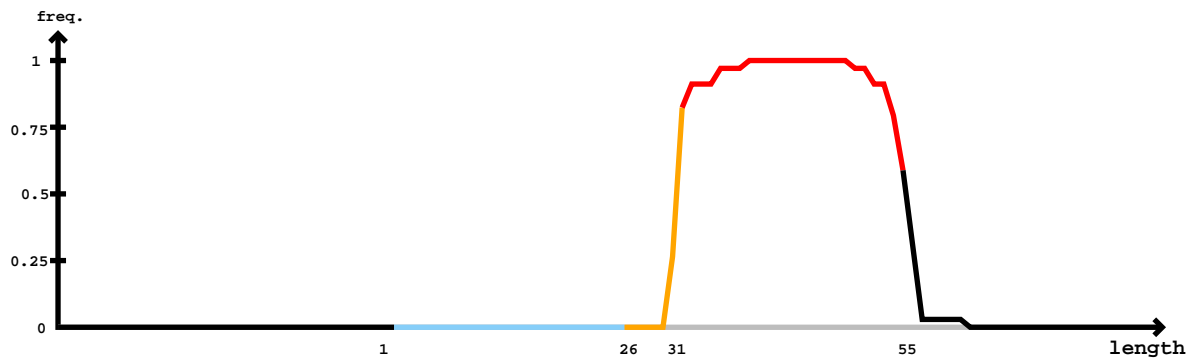

| 5'                                                                                    | Star             | Mature           | -3'            | exp     | reads | mm | sample |
|---------------------------------------------------------------------------------------|------------------|------------------|----------------|---------|-------|----|--------|
| ucagaccaagguucgaauccgggagguggaggc                                                     | ucuuacagcuccaucg | ccgcccggccuuucuc | ccgggagaguggag | ggcuaUu | 1     | 1  | S03    |
| .....((((((((((((((((((((.....((((((((.....(((((.....)))))))))...)))...)))))))))..... | .....            | .....            | .....          | .....   | 1     | 1  | S03    |
| .....                                                                                 | .....            | .....            | .....          | .....   | 1     | 1  | S03    |
| .....                                                                                 | .....            | .....            | .....          | .....   | 5     | 1  | S03    |
| .....                                                                                 | .....            | .....            | .....          | .....   | 1     | 1  | S03    |
| .....                                                                                 | .....            | .....            | .....          | .....   | 2     | 1  | S03    |
| .....                                                                                 | .....            | .....            | .....          | .....   | 6     | 1  | S03    |
| .....                                                                                 | .....            | .....            | .....          | .....   | 1     | 1  | S03    |
| .....                                                                                 | .....            | .....            | .....          | .....   | 1     | 1  | S03    |
| .....                                                                                 | .....            | .....            | .....          | .....   | 1     | 1  | S04    |
| .....                                                                                 | .....            | .....            | .....          | .....   | 1     | 1  | S04    |
| .....                                                                                 | .....            | .....            | .....          | .....   | 10    | 1  | S04    |
| .....                                                                                 | .....            | .....            | .....          | .....   | 1     | 1  | S04    |
| .....                                                                                 | .....            | .....            | .....          | .....   | 1     | 1  | S04    |
| .....                                                                                 | .....            | .....            | .....          | .....   | 1     | 1  | S04    |
| .....                                                                                 | .....            | .....            | .....          | .....   | 1     | 0  | S04    |



Star

Mature

aagcugcuaagcuauggauccca uaaagcccuuaucuuauagagagagaaaaaaggga uuuugguuauauggcuugcauauauaggagcuuuaacugccuuuaauugcuu

|                                      |      |   |     |
|--------------------------------------|------|---|-----|
| .....cuAgcauauauaggagcuuu.....       | 1    | 1 | S03 |
| .....cuugcauauauaggauUuuu.....       | 2    | 1 | S03 |
| .....cuugcUuaucuuaggagcuuu.....      | 1    | 1 | S03 |
| .....cuugcauauauaggagcCuu.....       | 5    | 1 | S03 |
| .....cuugcauauauaggagcuuC.....       | 82   | 1 | S03 |
| .....cuugcauauauaggauCuuu.....       | 1    | 1 | S03 |
| .....cuCgcauauauaggagcuuu.....       | 3    | 1 | S03 |
| .....Auugcauauauaggagcuuu.....       | 1    | 1 | S03 |
| .....cuugcauauauaggagcuuu.....       | 1064 | 0 | S03 |
| .....cuugcauauauaggCgcuuu.....       | 2    | 1 | S03 |
| .....cuugcauauauaggGgcuuu.....       | 4    | 1 | S03 |
| .....cuugcauauauaggagcuuu.....       | 2    | 1 | S03 |
| .....cuugcauauauaggagcGu.....        | 2    | 1 | S03 |
| .....cuugcauauauaggagcCu.....        | 2    | 1 | S03 |
| .....cuugcauauauaggagcuuG.....       | 29   | 1 | S03 |
| .....cGugcauauauaggagcuuu.....       | 2    | 1 | S03 |
| .....cuugcauauauaggagcuuu.....       | 1    | 1 | S03 |
| .....cuugcauauauUggagcuuu.....       | 1    | 1 | S03 |
| .....cuugcauauauCaggagcuuu.....      | 4    | 1 | S03 |
| .....cuugcCuaucuuaggagcuuu.....      | 1    | 1 | S03 |
| .....cuugcauauauaggagcuuuG.....      | 1    | 1 | S03 |
| .....cuugcauauauaggagcuuuU.....      | 1    | 1 | S03 |
| .....uugcauauauaggagcuu.....         | 1    | 0 | S03 |
| .....uugcauauauaggagGuuu.....        | 1    | 1 | S03 |
| .....uugcauauauaggGgcuuu.....        | 1    | 1 | S03 |
| .....uugcauauauaggagcuuC.....        | 3    | 1 | S03 |
| .....uugcauauUuaggagcuuu.....        | 1    | 1 | S03 |
| .....uGcauauauaggagcuuu.....         | 2    | 1 | S03 |
| .....uugcauauauaggauCuuu.....        | 1    | 1 | S03 |
| .....uugcauauauaggagcuuA.....        | 1    | 1 | S03 |
| .....uugcGuaucuuaggagcuuu.....       | 1    | 1 | S03 |
| .....uugcauauauaggagcuuu.....        | 57   | 0 | S03 |
| .....uugcauauauaggagcuuuU.....       | 1    | 1 | S03 |
| .....                                |      |   |     |
| .....agcugcuaagcuauggauc.....        | 3    | 0 | S04 |
| .....agcugcuaagcuauggaucA.....       | 1    | 1 | S04 |
| .....agcugcuaagcuauggaucC.....       | 13   | 0 | S04 |
| .....agcugcuaagcuauggaCcc.....       | 1    | 1 | S04 |
| .....agcugcuaagcuauggaucU.....       | 1    | 1 | S04 |
| .....agcugcuaagcuauggaucU.....       | 16   | 1 | S04 |
| .....agcugcuaagcuauggaucC.....       | 25   | 0 | S04 |
| .....agcugcuaagcuauggaucCA.....      | 7    | 1 | S04 |
| .....cugcuaagcuauggauccca.....       | 2    | 0 | S04 |
| .....Aaaaaaaggga uuuugguuauaugg..... | 2    | 1 | S04 |
| .....uuauaggcuugcauauau.....         | 1    | 0 | S04 |
| .....uggcuugcauauauaggagA.....       | 1    | 1 | S04 |
| .....uggcuugcauauauaggagC.....       | 1    | 0 | S04 |
| .....cuugcauauauaggagC.....          | 5    | 0 | S04 |
| .....cuugcauauauaggagA.....          | 1    | 1 | S04 |
| .....cuugcauauauaggagcu.....         | 6    | 0 | S04 |
| .....cuugcauauauaggagcuu.....        | 7    | 0 | S04 |
| .....cuugcauauauaggagcC.....         | 1    | 1 | S04 |
| .....cuugcauauCcuaggagcuuu.....      | 4    | 1 | S04 |
| .....cuugcauauauaggagcuuA.....       | 23   | 1 | S04 |
| .....cuugcauauGuaggagcuuu.....       | 1    | 1 | S04 |
| .....cuugcauauauaggauCuuu.....       | 2    | 1 | S04 |
| .....cuugcauauauaggagcuuu.....       | 1    | 1 | S04 |
| .....cuugcUuaucuuaggagcuuu.....      | 2    | 1 | S04 |
| .....cuCgcauauauaggagcuuu.....       | 6    | 1 | S04 |
| .....cGugcauauauaggagcuuu.....       | 5    | 1 | S04 |
| .....cuugcaCaucuuaggagcuuu.....      | 5    | 1 | S04 |
| .....cAugcauauauaggagcuuu.....       | 3    | 1 | S04 |
| .....cuugcauauUuaggagcuuu.....       | 1    | 1 | S04 |
| .....cuugcCuaucuuaggagcuuu.....      | 1    | 1 | S04 |
| .....cuugcauauauaggagcCuu.....       | 2    | 1 | S04 |
| .....cuugcauauauaggauUuuu.....       | 1    | 1 | S04 |
| .....cuugcauauauaggagcCuu.....       | 2    | 1 | S04 |
| .....cuugcauauauaggagcCuu.....       | 1    | 1 | S04 |
| .....cuugcauauauaggagcCuu.....       | 1    | 1 | S04 |
| .....cuuAcuaucuuaggagcuuu.....       | 4    | 1 | S04 |
| .....cuugcauUucuuaggagcuuu.....      | 1    | 1 | S04 |
| .....cuuUcauauauaggagcuuu.....       | 3    | 1 | S04 |

Star

Mature

|                                                                                                              |      |   |     |
|--------------------------------------------------------------------------------------------------------------|------|---|-----|
| aagcugcuaagcuauggaucuccauaagcccuauaaccuuauagagagaaaaaaggauuugguuauauggcuugcauauauaggagcuuuAACUUGCCUUUAUUGCUU |      |   |     |
| .....CUUCcauauauaggagcuuu.....                                                                               | 1    | 1 | S04 |
| .....Uuugcauauauaggagcuuu.....                                                                               | 2    | 1 | S04 |
| .....cuugcauauauaggagcuuC.....                                                                               | 152  | 1 | S04 |
| .....cuugcauauauaggagcuuu.....                                                                               | 2    | 1 | S04 |
| .....Nuugcauauauaggagcuuu.....                                                                               | 2    | 1 | S04 |
| .....cuugcauauauaggagcuuu.....                                                                               | 1    | 1 | S04 |
| .....cuugcauauauaggagcuuG.....                                                                               | 55   | 1 | S04 |
| .....cCugcauauauaggagcuuu.....                                                                               | 2    | 1 | S04 |
| .....cuugcauauauaggagcGuu.....                                                                               | 1    | 1 | S04 |
| .....cuugcauauauaggagcAuuu.....                                                                              | 1    | 1 | S04 |
| .....cuugcauauauaggagcuu.....                                                                                | 1    | 1 | S04 |
| .....cuugcauauauaggagcuu.....                                                                                | 1    | 1 | S04 |
| .....cuugcauauauaggagcuu.....                                                                                | 5    | 1 | S04 |
| .....cuugcauauauaggagcuu.....                                                                                | 1585 | 0 | S04 |
| .....cuugcauauauaggagcuu.....                                                                                | 3    | 1 | S04 |
| .....cuugcauauauaggagcuu.....                                                                                | 1    | 1 | S04 |
| .....cuugcauauauaggGgcuuu.....                                                                               | 6    | 1 | S04 |
| .....cuugcauauauaggagcCu.....                                                                                | 5    | 1 | S04 |
| .....cuugcauauauaggagcuu.....                                                                                | 5    | 1 | S04 |
| .....cuugcauauauaggGgcuuu.....                                                                               | 1    | 1 | S04 |
| .....cuugcauauauaggagcuu.....                                                                                | 1    | 1 | S04 |
| .....cuugcauauauaggagcAuu.....                                                                               | 1    | 1 | S04 |
| .....cuugcGuaucuuaggagcuu.....                                                                               | 8    | 1 | S04 |
| .....cuugcauauauaggagcuu.....                                                                                | 4    | 1 | S04 |
| .....cuugcauauauaggagcuu.....                                                                                | 1    | 1 | S04 |
| .....cuugcauauauaggGgcuuu.....                                                                               | 3    | 1 | S04 |
| .....cuugcauauauaggagcuu.....                                                                                | 4    | 1 | S04 |
| .....cuugcauauauaggGgcuuu.....                                                                               | 1    | 1 | S04 |
| .....cuugcauauauaggagcuuC.....                                                                               | 2    | 1 | S04 |
| .....cuugcauauauaggagcuuU.....                                                                               | 3    | 1 | S04 |
| .....cuugcauauauaggagcuuu.....                                                                               | 1    | 0 | S04 |
| .....cuugcauauauaggagcuuuG.....                                                                              | 1    | 1 | S04 |
| .....cuugcauauauaggagcuuuacA.....                                                                            | 2    | 1 | S04 |
| .....uugcauauauaggagcuu.....                                                                                 | 61   | 0 | S04 |
| .....Cugcauauauaggagcuu.....                                                                                 | 1    | 1 | S04 |
| .....uugcauauauaggagcuuC.....                                                                                | 10   | 1 | S04 |
| .....Gugcauauauaggagcuu.....                                                                                 | 2    | 1 | S04 |
| .....uugcauauauaggagcuu.....                                                                                 | 1    | 1 | S04 |
| .....uugcauauauaggagcuu.....                                                                                 | 1    | 1 | S04 |
| .....uugcauauauaggagcuu.....                                                                                 | 1    | 1 | S04 |
| .....uugcauauauaggagcuu.....                                                                                 | 1    | 1 | S04 |
| .....uugcauauauaggagcuu.....                                                                                 | 1    | 1 | S04 |
| .....uugcauauauaggagcuu.....                                                                                 | 1    | 1 | S04 |
| .....uugcauauauaggagcuu.....                                                                                 | 2    | 1 | S04 |
| .....uugcauauauaggagcuu.....                                                                                 | 1    | 0 | S04 |
| .....uugcauauauaggagcuu.....                                                                                 | 1    | 1 | S04 |

Provisional ID : chrA08\_694262  
 Score total : 0.4  
 Score for star read(s) : -1.3  
 Score for read counts : 0  
 Score for mfe : 1.7  
 Score for randfold : 0  
 Score for cons. seed :  
 Total read count : 12  
 Mature read count : 12  
 Loop read count : 0  
 Star read count : 0

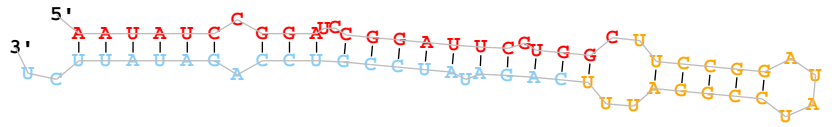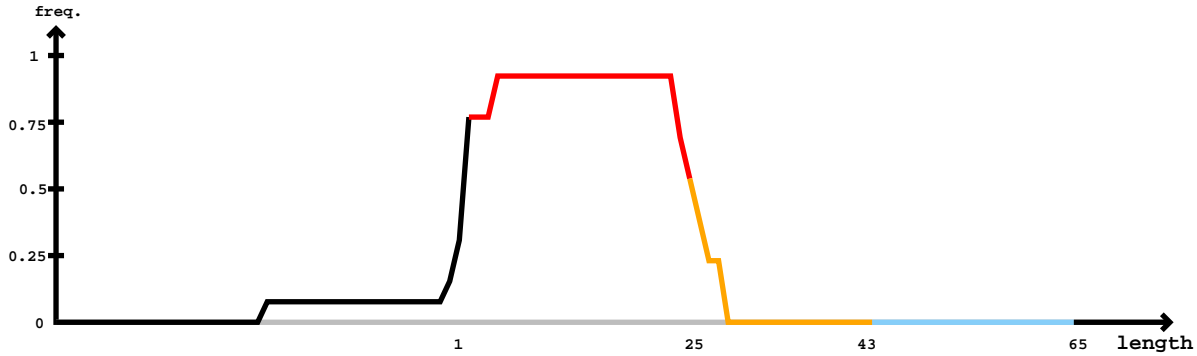

Mature
Star

| 5' -                                                                                                                   | -3' | exp | reads | mm | sample |
|------------------------------------------------------------------------------------------------------------------------|-----|-----|-------|----|--------|
| ccagauaucggauauucaggauaccggaucCGUGAAUUU <u>aaauaccggaucCGGAUCGUGGCUUCCGGAUUCCGGAUUUCAGAUUCCGUCCAGAUUUCU</u> UAUUACCUGC |     |     |       |    |        |
| .....uuauuaccggaucCGGAUCGUG.....                                                                                       |     |     | 1     | 0  | S03    |
| .....uaauuaccggaucCGGAUCGUGG.....                                                                                      |     |     | 1     | 0  | S03    |
| .....aaauaccggaucCGGAUCGUGG.....                                                                                       |     |     | 1     | 0  | S03    |
| .....aaauaccggaucCGGAUCGUGGC.....                                                                                      |     |     | 1     | 0  | S03    |
| .....aaauaccggaucCGGAUCGUGG.....                                                                                       |     |     | 1     | 1  | S03    |
| .....aaauaccggaucCGGAUCGUGGA.....                                                                                      |     |     | 1     | 1  | S03    |
| .....auccggaucUGGAUCGUGGCUUC.....                                                                                      |     |     | 1     | 1  | S03    |
| .....gauaccggaucCGUGAAUUUAAU.....                                                                                      |     |     | 1     | 0  | S04    |
| .....uaauuaccggaucCGGAUCGUG.....                                                                                       |     |     | 1     | 0  | S04    |
| .....aaauuaccggaucCGGAUCGUG.....                                                                                       |     |     | 1     | 0  | S04    |
| .....aaauuaccggaucCGGAUCGUGG.....                                                                                      |     |     | 1     | 1  | S04    |
| .....auccggaucUGGAUCGUGGCUUC.....                                                                                      |     |     | 1     | 1  | S04    |
| .....auccggaucCGGAUCGUGAUCUUC.....                                                                                     |     |     | 1     | 1  | S04    |





Mature Star

|                                                                                                                   |    |   |     |
|-------------------------------------------------------------------------------------------------------------------|----|---|-----|
| aaccagcuuuugauuuuaagagguucagagcgguuuguagcgguuuguauuguuuucaaaauguugucaacugcuacuaaccgcaaaagcugcguuuugcggaucguaccggg |    |   |     |
| . . . . . guagcgguuuguauuguuuu . . . . .                                                                          | 1  | 0 | S03 |
| . . . . . guagcgguuuguauuguuuuG . . . . .                                                                         | 2  | 1 | S03 |
| . . . . . guagcgguuCguauuguuuu . . . . .                                                                          | 1  | 1 | S03 |
| . . . . . guagcgguuuguauuguuuuA . . . . .                                                                         | 1  | 1 | S03 |
| . . . . . uagcgguuuguauugC . . . . .                                                                              | 1  | 1 | S03 |
| . . . . . uagcgguuuguauuguu . . . . .                                                                             | 1  | 0 | S03 |
| . . . . . uagcgguuCguauuguuuuca . . . . .                                                                         | 1  | 1 | S03 |
| . . . . . uagcgguuuguauuguuuuC . . . . .                                                                          | 1  | 1 | S03 |
| . . . . . uagcgguuuguauuguuuuca . . . . .                                                                         | 4  | 0 | S03 |
| . . . . . agcgguuuguauuguu . . . . .                                                                              | 1  | 0 | S03 |
| . . . . . agcgguuuguauuguu . . . . .                                                                              | 1  | 0 | S03 |
| . . . . . agcgguuuguauuguuuu . . . . .                                                                            | 1  | 0 | S03 |
| . . . . . agcgguuuguauuguuuuG . . . . .                                                                           | 2  | 1 | S03 |
| . . . . . agcgguuuguauuguuuuA . . . . .                                                                           | 1  | 1 | S03 |
| . . . . . agcgguuuguauuguuuuC . . . . .                                                                           | 2  | 0 | S03 |
| . . . . . agcgguuCguauuguuuuca . . . . .                                                                          | 1  | 1 | S03 |
| . . . . . agcgguuuguauuguuuuca . . . . .                                                                          | 1  | 0 | S03 |
| . . . . . caaaauguugucaacugcuacua . . . . .                                                                       | 1  | 0 | S03 |
| . . . . . aaaauguugucaacugcuacuaac . . . . .                                                                      | 1  | 0 | S03 |
| . . . . . guugucaacugcuacuaacc . . . . .                                                                          | 1  | 0 | S03 |
| . . . . . uuuugauuuuaagagguucagagc . . . . .                                                                      | 2  | 0 | S04 |
| . . . . . uugauuuuaagagguucagagc . . . . .                                                                        | 1  | 0 | S04 |
| . . . . . uuuuaagagguucagagcgguuugu . . . . .                                                                     | 1  | 0 | S04 |
| . . . . . agagguucaAagcgguuuguagcg . . . . .                                                                      | 1  | 1 | S04 |
| . . . . . agguucagagcgguuuguagcgguu . . . . .                                                                     | 3  | 0 | S04 |
| . . . . . guucagagcgguuuguagcggCu . . . . .                                                                       | 1  | 1 | S04 |
| . . . . . ucagagcgguuuguagcgguuug . . . . .                                                                       | 1  | 0 | S04 |
| . . . . . ucagagcgguuuguagcgguuugu . . . . .                                                                      | 1  | 0 | S04 |
| . . . . . gagcgguuuguagcgguuugua . . . . .                                                                        | 1  | 0 | S04 |
| . . . . . agcgguuuguagcgguuCu . . . . .                                                                           | 1  | 1 | S04 |
| . . . . . agcgguuCguagcgguuuguauug . . . . .                                                                      | 1  | 1 | S04 |
| . . . . . uuuuguagcgguuuguauug . . . . .                                                                          | 4  | 0 | S04 |
| . . . . . uuuuguagcgguuuguauugG . . . . .                                                                         | 2  | 1 | S04 |
| . . . . . Guuguagcgguuuguauuguu . . . . .                                                                         | 1  | 1 | S04 |
| . . . . . uuuuguagcgguuuguauugC . . . . .                                                                         | 1  | 1 | S04 |
| . . . . . uuuuguagcgguuuguauuguu . . . . .                                                                        | 12 | 0 | S04 |
| . . . . . uuguagcgguuuguauuguu . . . . .                                                                          | 1  | 0 | S04 |
| . . . . . uuguagcgguuuguauuguu . . . . .                                                                          | 2  | 0 | S04 |
| . . . . . uguagcgguuuguauug . . . . .                                                                             | 2  | 0 | S04 |
| . . . . . uguagcgguuuguauuguu . . . . .                                                                           | 1  | 0 | S04 |
| . . . . . uguagcgguuuguauuguuuu . . . . .                                                                         | 1  | 0 | S04 |
| . . . . . uguagcgguuuguauuguuuuC . . . . .                                                                        | 2  | 0 | S04 |
| . . . . . uguagcgguuuguauuguuuuA . . . . .                                                                        | 2  | 1 | S04 |
| . . . . . guagcgguuuguauugA . . . . .                                                                             | 1  | 1 | S04 |
| . . . . . guagcgguuuguauug . . . . .                                                                              | 3  | 0 | S04 |
| . . . . . guagcgguuuguauuguu . . . . .                                                                            | 1  | 0 | S04 |
| . . . . . guagcgguuuguauuguuuu . . . . .                                                                          | 1  | 1 | S04 |
| . . . . . uagcgguuuguauuguuuuC . . . . .                                                                          | 1  | 0 | S04 |
| . . . . . uagcgguuuguauuguuuuca . . . . .                                                                         | 11 | 0 | S04 |
| . . . . . agcgguuuguauuguu . . . . .                                                                              | 1  | 0 | S04 |
| . . . . . agcgguuuguauugC . . . . .                                                                               | 1  | 1 | S04 |
| . . . . . agcgguuuguauuguuuuC . . . . .                                                                           | 3  | 0 | S04 |
| . . . . . agcgguuuguauuguuuuca . . . . .                                                                          | 1  | 1 | S04 |
| . . . . . agcgguuuguauuguuuucaa . . . . .                                                                         | 1  | 0 | S04 |
| . . . . . gcgguuuguauuguuuuC . . . . .                                                                            | 1  | 0 | S04 |
| . . . . . cgAuuuuguauuguuuucaaaa . . . . .                                                                        | 1  | 1 | S04 |
| . . . . . aaaauguugucaacugcuacuaac . . . . .                                                                      | 1  | 0 | S04 |
| . . . . . ugucaacugcuacuaaccgcaaa . . . . .                                                                       | 1  | 0 | S04 |
| . . . . . acugcuacuaaccgcaaaagcugc . . . . .                                                                      | 1  | 0 | S04 |
| . . . . . cuacuaaccgcaaaagcuguuu . . . . .                                                                        | 1  | 0 | S04 |



Mature Star

|                                                                                                                    |    |   |     |
|--------------------------------------------------------------------------------------------------------------------|----|---|-----|
| aaccagcuuuugauuuuaagagguucagagcgguuuguagcgguuuguauuguuuucaaaauuguugucaacugcuacuaaccgcaaaagcugcguuuugcggaucguaccggg |    |   |     |
| . . . . . guagcgguuuguauuguuuu . . . . .                                                                           | 1  | 0 | S03 |
| . . . . . guagcgguuuguauuguuuuG . . . . .                                                                          | 2  | 1 | S03 |
| . . . . . guagcgguuCguauuguuuu . . . . .                                                                           | 1  | 1 | S03 |
| . . . . . guagcgguuuguauuguuuuA . . . . .                                                                          | 1  | 1 | S03 |
| . . . . . uagcgguuuguauugC . . . . .                                                                               | 1  | 1 | S03 |
| . . . . . uagcgguuuguauuguu . . . . .                                                                              | 1  | 0 | S03 |
| . . . . . uagcgguuCguauuguuuuca . . . . .                                                                          | 1  | 1 | S03 |
| . . . . . uagcgguuuguauuguuuuC . . . . .                                                                           | 1  | 1 | S03 |
| . . . . . uagcgguuuguauuguuuuca . . . . .                                                                          | 4  | 0 | S03 |
| . . . . . agcgguuuguauuguu . . . . .                                                                               | 1  | 0 | S03 |
| . . . . . agcgguuuguauuguu . . . . .                                                                               | 1  | 0 | S03 |
| . . . . . agcgguuuguauuguuuu . . . . .                                                                             | 1  | 0 | S03 |
| . . . . . agcgguuuguauuguuuuG . . . . .                                                                            | 2  | 1 | S03 |
| . . . . . agcgguuuguauuguuuuA . . . . .                                                                            | 1  | 1 | S03 |
| . . . . . agcgguuuguauuguuuuC . . . . .                                                                            | 2  | 0 | S03 |
| . . . . . agcgguuCguauuguuuuca . . . . .                                                                           | 1  | 1 | S03 |
| . . . . . agcgguuuguauuguuuuca . . . . .                                                                           | 1  | 0 | S03 |
| . . . . . caaaauuguugucaacugcuac . . . . .                                                                         | 1  | 0 | S03 |
| . . . . . aaaaauuguugucaacugcuacuaac . . . . .                                                                     | 1  | 0 | S03 |
| . . . . . guugucaacugcuacuaacc . . . . .                                                                           | 1  | 0 | S03 |
| . . . . . uuuugauuuuaagagguucagagC . . . . .                                                                       | 2  | 0 | S04 |
| . . . . . ugauuuuaagagguucagagc . . . . .                                                                          | 1  | 0 | S04 |
| . . . . . uuuuaagagguucagagcgguuugu . . . . .                                                                      | 1  | 0 | S04 |
| . . . . . agagguucaAagcgguuuguagcg . . . . .                                                                       | 1  | 1 | S04 |
| . . . . . agguucagagcgguuuguagcgg . . . . .                                                                        | 3  | 0 | S04 |
| . . . . . guucagagcgguuuguagcggCu . . . . .                                                                        | 1  | 1 | S04 |
| . . . . . ucagagcgguuuguagcgguuug . . . . .                                                                        | 1  | 0 | S04 |
| . . . . . ucagagcgguuuguagcgguuugu . . . . .                                                                       | 1  | 0 | S04 |
| . . . . . gagcgguuuguagcgguuugua . . . . .                                                                         | 1  | 0 | S04 |
| . . . . . agcgguuuguagcggCu . . . . .                                                                              | 1  | 1 | S04 |
| . . . . . agcggCuuguagcgguuuguag . . . . .                                                                         | 1  | 1 | S04 |
| . . . . . uuuuguagcgguuuguauug . . . . .                                                                           | 4  | 0 | S04 |
| . . . . . uuuguagcgguuuguauugG . . . . .                                                                           | 2  | 1 | S04 |
| . . . . . Guuguagcgguuuguauuguu . . . . .                                                                          | 1  | 1 | S04 |
| . . . . . uuuguagcgguuuguauugC . . . . .                                                                           | 1  | 1 | S04 |
| . . . . . uuuguagcgguuuguauuguu . . . . .                                                                          | 12 | 0 | S04 |
| . . . . . uuuguagcgguuuguauuguu . . . . .                                                                          | 1  | 0 | S04 |
| . . . . . uuuguagcgguuuguauuguu . . . . .                                                                          | 2  | 0 | S04 |
| . . . . . uguagcgguuuguauug . . . . .                                                                              | 2  | 0 | S04 |
| . . . . . uguagcgguuuguauuguu . . . . .                                                                            | 1  | 0 | S04 |
| . . . . . uguagcgguuuguauuguuuu . . . . .                                                                          | 1  | 0 | S04 |
| . . . . . uguagcgguuuguauuguuuuC . . . . .                                                                         | 2  | 0 | S04 |
| . . . . . uguagcgguuuguauuguuuuA . . . . .                                                                         | 2  | 1 | S04 |
| . . . . . guagcgguuuguauA . . . . .                                                                                | 1  | 1 | S04 |
| . . . . . guagcgguuuguauug . . . . .                                                                               | 3  | 0 | S04 |
| . . . . . guagcgguuuguauuguu . . . . .                                                                             | 1  | 0 | S04 |
| . . . . . guagcgguuuguauuguuuu . . . . .                                                                           | 1  | 1 | S04 |
| . . . . . uagcgguuuguauuguuuuC . . . . .                                                                           | 1  | 0 | S04 |
| . . . . . uagcgguuuguauuguuuuca . . . . .                                                                          | 11 | 0 | S04 |
| . . . . . agcgguuuguauuguu . . . . .                                                                               | 1  | 0 | S04 |
| . . . . . agcgguuuguauugC . . . . .                                                                                | 1  | 1 | S04 |
| . . . . . agcgguuuguauuguuuuC . . . . .                                                                            | 3  | 0 | S04 |
| . . . . . agcgguuuguauuguuuuca . . . . .                                                                           | 1  | 1 | S04 |
| . . . . . agcgguuuguauuguuuucaa . . . . .                                                                          | 1  | 0 | S04 |
| . . . . . gcgguuuguauuguuuuC . . . . .                                                                             | 1  | 0 | S04 |
| . . . . . cgAuuuuguauuguuuucaaaau . . . . .                                                                        | 1  | 1 | S04 |
| . . . . . aaaaauuguugucaacugcuacuaac . . . . .                                                                     | 1  | 0 | S04 |
| . . . . . ugucaacugcuacuaaccgcaaa . . . . .                                                                        | 1  | 0 | S04 |
| . . . . . acugcuacuaaccgcaaaagcugc . . . . .                                                                       | 1  | 0 | S04 |
| . . . . . cuacuaaccgcaaaagcuguuu . . . . .                                                                         | 1  | 0 | S04 |

Provisional ID : chrA08\_711459  
 Score total : 0.1  
 Score for star read(s) : 3.9  
 Score for read counts : -3.9  
 Score for mfe : 0.2  
 Score for randfold : 0  
 Score for cons. seed :  
 Total read count : 4  
 Mature read count : 3  
 Loop read count : 0  
 Star read count : 1

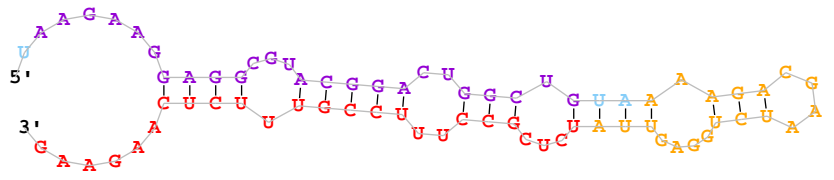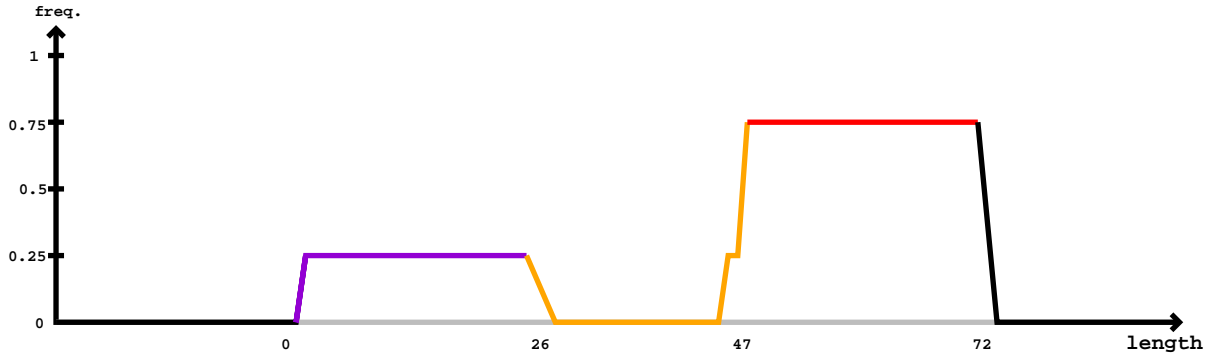

**Star**

**Mature**

| 5' -                     |                                  | -3'                                                              | obs | exp | reads | mm | sample |
|--------------------------|----------------------------------|------------------------------------------------------------------|-----|-----|-------|----|--------|
| uuauccauaaugggagagguccuu | <b>aagaaggaggcguacggacuggcug</b> | uaaaagacgaaucuggaguuauucugccuuuccguuuucaagaagguuccaguuuccuuuaacg | 1   | 0   | 1     | 0  | S03    |
| uuauccauaaugggagagguccuu | <b>aagaaggaggcguacggacuggcug</b> | uaaaagacgaaucuggaguuauucugccuuuccguuuucaagaagguuccaguuuccuuuaacg | 1   | 0   | 1     | 0  | S04    |
|                          |                                  | uaucugccuuuccguuuucaagaag                                        | 2   | 0   | 2     | 0  | S04    |









Mature

Star

|                                         |                        |                                   |                                    |       |
|-----------------------------------------|------------------------|-----------------------------------|------------------------------------|-------|
| aggaaacacaaaauuuggcuuccucggaauuuccuugga | auauuccgacggaauuccgagg | auuucgacggaauuuccgacggaauaccgagga | aaucucgucggaauuuccgacggaauaccgagga | aaag  |
| .....                                   | cgacggaauuccgagga      | .....                             | .....                              | ..... |
| .....                                   | cgacggaauuccgagga      | Uuu                               | .....                              | ..... |
| .....                                   | .....                  | aaucucgucggaauuuccg               | .....                              | ..... |
| .....                                   | .....                  | ucggaauuuccgacggaau               | .....                              | ..... |
| .....                                   | .....                  | ggaauuuccgacggaCuac               | .....                              | ..... |
| .....                                   | .....                  | gaaauuccgacggaauaccgagC           | .....                              | ..... |
| .....                                   | .....                  | auauuccgacggaauaccgagU            | .....                              | ..... |
| .....                                   | .....                  | cgacggaauuccgagga                 | .....                              | ..... |

|   |   |     |
|---|---|-----|
| 1 | 0 | S04 |
| 1 | 1 | S04 |
| 1 | 0 | S04 |
| 1 | 1 | S04 |
| 1 | 1 | S04 |
| 1 | 1 | S04 |
| 1 | 1 | S04 |
| 1 | 0 | S04 |



Provisional ID : chrA08\_744962  
 Score total : 0.1  
 Score for star read(s) : -1.3  
 Score for read counts : 0  
 Score for mfe : 1.4  
 Score for randfold : 0  
 Score for cons. seed :  
 Total read count : 27  
 Mature read count : 27  
 Loop read count : 0  
 Star read count : 0

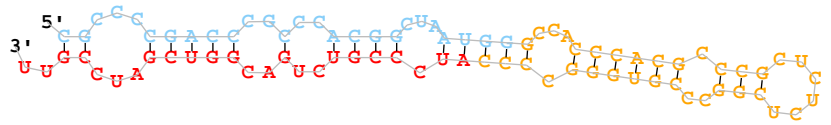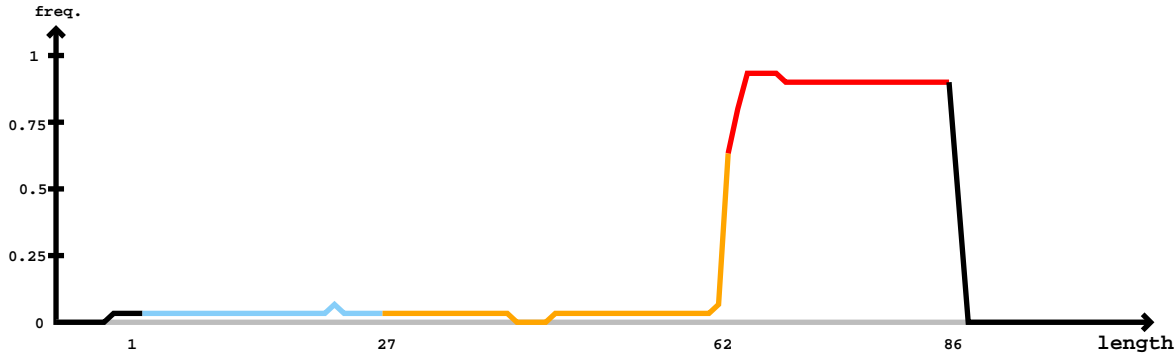

Star

Mature

| 5'                                                                                      | 3'                    | exp | reads | mm | sample |
|-----------------------------------------------------------------------------------------|-----------------------|-----|-------|----|--------|
| cuuaaagcggccgacccgcccacggcuuaugggcaacccacgcccgcucucggcccggggcccaucccgucugacggucgauccguu | aaauuuucuaaaggcucgaaa |     | 8     | 0  | S03    |
| .....                                                                                   | .....                 |     | 1     | 1  | S03    |
| .....                                                                                   | .....                 |     | 1     | 1  | S03    |
| .....                                                                                   | .....                 |     | 1     | 0  | S03    |
| .....                                                                                   | .....                 |     | 1     | 0  | S03    |
| .....                                                                                   | .....                 |     | 1     | 0  | S03    |
| .....                                                                                   | .....                 |     | 1     | 0  | S03    |
| .....                                                                                   | .....                 |     | 1     | 1  | S04    |
| .....                                                                                   | .....                 |     | 1     | 1  | S04    |
| .....                                                                                   | .....                 |     | 1     | 1  | S04    |
| .....                                                                                   | .....                 |     | 1     | 0  | S04    |
| .....                                                                                   | .....                 |     | 3     | 1  | S04    |
| .....                                                                                   | .....                 |     | 4     | 0  | S04    |
| .....                                                                                   | .....                 |     | 3     | 0  | S04    |
| .....                                                                                   | .....                 |     | 1     | 0  | S04    |
| .....                                                                                   | .....                 |     | 1     | 1  | S04    |
| .....                                                                                   | .....                 |     | 1     | 0  | S04    |













**Mature**

**Star**

uucagucgguuccaagaagaagggacguauggucgguuugggucgucgcucccgucggcugcucuuucucugcaccacggcauauguugauccagaaguucuuacggc

.....uuugggucgucgcucccgucggc.....

.....cggucggcugUuccuucucu.....

2

1

0

1

S04

S04









Provisional ID : chrA09\_793296  
 Score total : 28.5  
 Score for star read(s) : 3.9  
 Score for read counts : 23.6  
 Score for mfe : 1.1  
 Score for randfold : 0  
 Score for cons. seed :  
 Total read count : 58  
 Mature read count : 49  
 Loop read count : 0  
 Star read count : 9

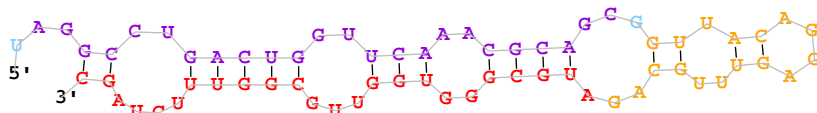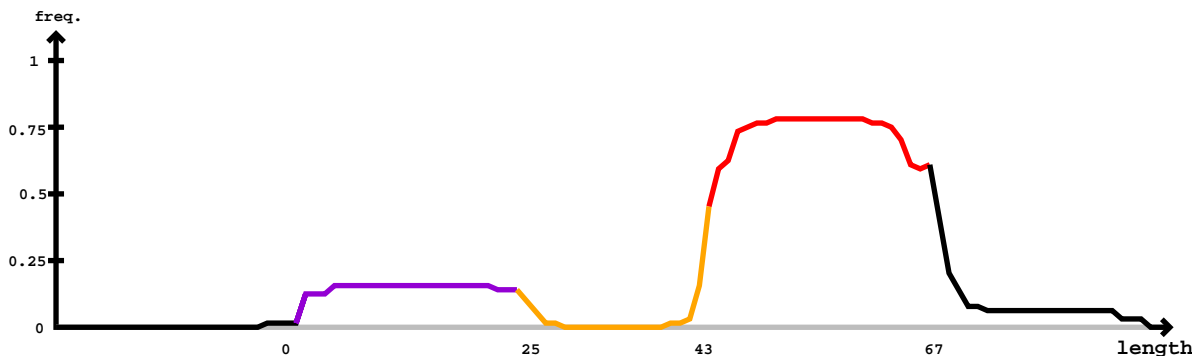

**Star**

**Mature**

| 5' -                                                                                                               | reads | mm | sample |
|--------------------------------------------------------------------------------------------------------------------|-------|----|--------|
| aguaaaugcauuuuugugauauuuaggccugacugguucaaaacgcagcgguuacaggaguugcagaugcgggugguugcgguuucuaagcgguuagaaauggugcguuugcgg | 1     | 0  | S03    |
| aguaaaugcauuuuugugauauuuaggccugacugguucaaaacgcagcgguuacaggaguugcagaugcgggugguugcgguuucuaagcgguuagaaauggugcguuugcgg | 1     | 1  | S03    |
| .....auuaggccugacugguucaaaacg.....                                                                                 | 1     | 0  | S03    |
| .....aggccugacuguucaaaacgcagc.....                                                                                 | 1     | 1  | S03    |
| .....aggccugacugguucaaaacgcagc.....                                                                                | 1     | 0  | S03    |
| .....ccugacugguucaaaacgcaC.....                                                                                    | 1     | 1  | S03    |
| .....agaugcgggugguugcgguuuc.....                                                                                   | 1     | 0  | S03    |
| .....gaugcgggugguugcgguuuc.....                                                                                    | 1     | 0  | S03    |
| .....gaugcgggugguugcgguuuc.....                                                                                    | 2     | 0  | S03    |
| .....gaugcgggugguugcgguuuc.....                                                                                    | 1     | 0  | S03    |
| .....gaugcgggugguugcgguuucua.....                                                                                  | 1     | 0  | S03    |
| .....augcgggugguugcgguuucuaagc.....                                                                                | 6     | 0  | S03    |
| .....ugcgggugguugcgguuuc.....                                                                                      | 1     | 0  | S03    |
| .....ugcgggugguugcgguuucuaagcG.....                                                                                | 1     | 1  | S03    |
| .....cgggugguugcgguuucuaagc.....                                                                                   | 2     | 0  | S03    |
| .....cgggugguugcgguuucuaagcgg.....                                                                                 | 1     | 0  | S03    |
| .....cgggugguugcgguuucuaagcgg.....                                                                                 | 1     | 0  | S03    |
| .....gggugguugcgguuucuaagcGU.....                                                                                  | 1     | 1  | S03    |
| .....ugguugcgguuucuaagcgg.....                                                                                     | 1     | 0  | S03    |
| .....gCGuuagaaauggugcguuugc.....                                                                                   | 1     | 0  | S03    |
| .....aggAcugacugguucaaaacgcagc.....                                                                                | 3     | 1  | S04    |
| .....aggccugacugguucaaaacgcagc.....                                                                                | 2     | 0  | S04    |
| .....ccugacugguucGaacgcagcgg.....                                                                                  | 1     | 1  | S04    |
| .....gcagaugcgggugguugcgg.....                                                                                     | 1     | 0  | S04    |
| .....gaugcgggugguugcgguuuc.....                                                                                    | 1     | 0  | S04    |
| .....gaugcgggugguugcgguuucua.....                                                                                  | 1     | 0  | S04    |
| .....gaugcgggugguugcgguuucuaag.....                                                                                | 1     | 0  | S04    |
| .....augcgggugguugcgguuuc.....                                                                                     | 2     | 0  | S04    |
| .....augcgggugguugcgguuucuaagc.....                                                                                | 9     | 0  | S04    |
| .....aGgcgggugguugcgguuucuaagc.....                                                                                | 1     | 1  | S04    |
| .....augcgggugguugcgguuucuaagA.....                                                                                | 1     | 1  | S04    |
| .....ugcgggugguugcgguuucGa.....                                                                                    | 1     | 1  | S04    |
| .....ugcgggugguugcgguuucuaagc.....                                                                                 | 4     | 0  | S04    |
| .....ugcgggugguugcgguuucuaagc.....                                                                                 | 2     | 0  | S04    |

Star

Mature

|                                                                                                                 |   |   |     |
|-----------------------------------------------------------------------------------------------------------------|---|---|-----|
| aguaaaugcaauuuugauauauaggccugacuggucaaacgcagcggguuacaggaguugcagaugcgggugguugcgguuucuaagcgguuagaaauggugcguuugcgg |   |   |     |
| .....gcgggugguugcgguuucC.....                                                                                   | 1 | 1 | S04 |
| .....gcgggugguugcgguuucuaagc.....                                                                               | 1 | 0 | S04 |
| .....cgggugguugcgguuucuaagcgg.....                                                                              | 2 | 0 | S04 |
| .....cgggugguugcgguuucuaagcgggu.....                                                                            | 1 | 0 | S04 |
| .....gAugguugcgguuucuaagcgguuu.....                                                                             | 1 | 1 | S04 |
| .....gcgguuagaaauggugcguu.....                                                                                  | 1 | 0 | S04 |
| .....cgguuagaaauggugcgu.....                                                                                    | 1 | 1 | S04 |
| .....cgguuagaaauggugcguuugc.....                                                                                | 1 | 0 | S04 |





Provisional ID : chrA09\_806149  
 Score total : 2.6  
 Score for star read(s) : 3.9  
 Score for read counts : 1.1  
 Score for mfe : -2.4  
 Score for randfold : 0  
 Score for cons. seed :  
 Total read count : 14  
 Mature read count : 13  
 Loop read count : 0  
 Star read count : 1

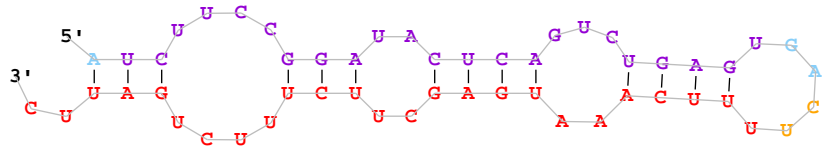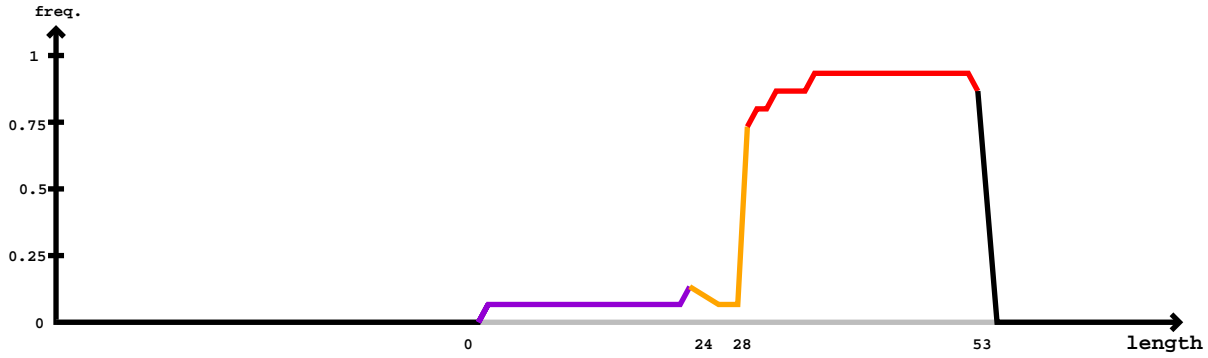

Star                      Mature

|                                                                                                                                                                                                                                                                                                                                                                                                                                                                                                                                                                                                                                                                                                     |                                                                                                                                                                                                                                                        |
|-----------------------------------------------------------------------------------------------------------------------------------------------------------------------------------------------------------------------------------------------------------------------------------------------------------------------------------------------------------------------------------------------------------------------------------------------------------------------------------------------------------------------------------------------------------------------------------------------------------------------------------------------------------------------------------------------------|--------------------------------------------------------------------------------------------------------------------------------------------------------------------------------------------------------------------------------------------------------|
| 5' - gaauguuuuugggugcagcagcuuuuaacucugcuaugccgaa <u>ucuuuccggauacucagucugagugacuuuucaaaugagcuucuuucugauuc</u> agucaucuuucacuuccuu<br>gaauguuuuugggugcagcagcuuuuaacucugcuaugccgaa <u>ucuuuccggauacucagucugagugacuuuucaaaugagcuucuuucugauuc</u> agucaucuuucacuuccuu<br>(((.....(((.....)))))).....(((.....(((.....)))))).....(((.....(((.....)))))).....(((.....(((.....)))))).....<br>.....ucuuuccggauacucagucugagu.....<br>.....uuucaaaugagcuucuuucugauuc.....<br>.....uuucaaaugagcuucuuucugauuc.....<br>.....gugacuuuucaaaugagcuucuuucugauu.....<br>.....uuGcaaaugagcuucuuucugauuc.....<br>.....uuucaaaugagcuucuuucugauuc.....<br>.....caaaugagcuucuuucugauuc.....<br>.....ugagcuucuuucugauuc..... | -3'    obs<br>exp<br>reads    mm    sample<br>1        0        S03<br>6        0        S03<br>1        0        S03<br><br>1        0        S04<br>1        1        S04<br>3        0        S04<br>1        0        S04<br>1        0        S04 |
|-----------------------------------------------------------------------------------------------------------------------------------------------------------------------------------------------------------------------------------------------------------------------------------------------------------------------------------------------------------------------------------------------------------------------------------------------------------------------------------------------------------------------------------------------------------------------------------------------------------------------------------------------------------------------------------------------------|--------------------------------------------------------------------------------------------------------------------------------------------------------------------------------------------------------------------------------------------------------|





Provisional ID : chrA09\_812936  
 Score total : 7.3  
 Score for star read(s) : 3.9  
 Score for read counts : 10.8  
 Score for mfe : -7.3  
 Score for randfold : 0  
 Score for cons. seed :  
 Total read count : 33  
 Mature read count : 32  
 Loop read count : 0  
 Star read count : 1

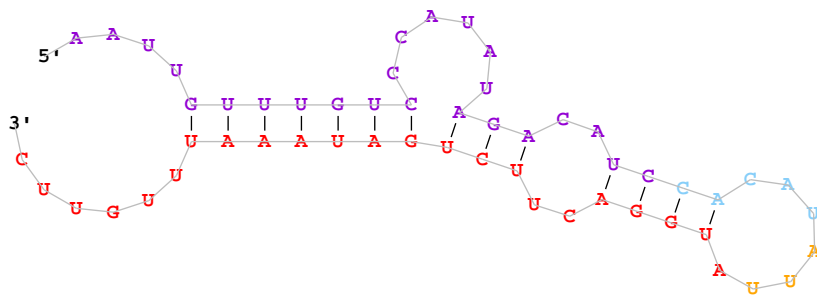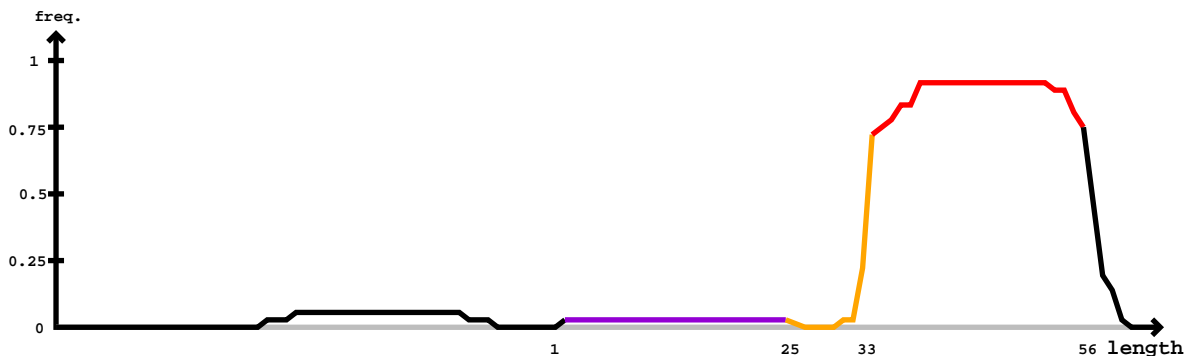

**Star** **Mature**

| <p>5' - uauauuuuuaggauugguuuuugugacuaauuucuaaaaauugucuaaaaa<u>uuuguuuuguccauuagacauc</u><b>ca</b>cauauuu<u>auggacuucugau</u>aaaauu<u>uguucau</u>ugaga<br/>       uauauuuuuaggauugguuuuugugacuaauuucuaaaaauugucuaaaaa<u>uuuguuuuguccauuagacauc</u><b>ca</b>cauauuu<u>auggacuucugau</u>aaaauu<u>uguucau</u>ugaga<br/>       .....((((((((((.....)))))).....((((.....((((.....((((.....)))))).....)))))).....))))))<br/>       .....uuugugacuaauuucuaaaa<u>uugC</u>.....<br/>       .....gugacuaauuucuaaaa.....<br/>       .....uagggacuucugauaaaauuuguuc.....<br/>       .....auggacuucugauaaaauuuguuc.....<br/>       .....augggcuucugauaaaauuuguuc.....<br/>       .....auggacuucugauaaaauuuguuca.....<br/>       .....ggacuucugauaaaauuuguucauu.....<br/>       .....gacuucugauaaaauuuguucauu.....<br/>       .....cuucugauaaaauuuguucau.....<br/>       .....cGucugauaaaauuuguucauu.....<br/>       .....cuucugauaaaauuuguucauu.....</p> | <p>.....aauguuuuguccauG<u>uagacauc</u>.....<br/>       .....auuauaggacuucugauaaaauuugu.....<br/>       .....uagggacuucugauaaaauuuguuc.....<br/>       .....uagggacuucugauaaaauuuguuU.....<br/>       .....auggacuucugauaaaauCu.....<br/>       .....auggacuucugauaaaauuugu.....<br/>       .....auggacuucugauaaaauuuguG.....<br/>       .....auggacuucugauaaaauuuguuc.....<br/>       .....auCgacuucugauaaaauuuguuc.....<br/>       .....augggcuucugauaaaauuuguuc.....<br/>       .....uggGcuucugauaaaauuuguucau.....<br/>       .....gacuucugauaaaauuuguucauuA.....</p> | <p>-3' obs<br/>exp</p> <table border="0"> <thead> <tr> <th>reads</th> <th>mm</th> <th>sample</th> </tr> </thead> <tbody> <tr><td>1</td><td>1</td><td>S03</td></tr> <tr><td>1</td><td>0</td><td>S03</td></tr> <tr><td>2</td><td>0</td><td>S03</td></tr> <tr><td>2</td><td>0</td><td>S03</td></tr> <tr><td>1</td><td>1</td><td>S03</td></tr> <tr><td>2</td><td>0</td><td>S03</td></tr> <tr><td>1</td><td>0</td><td>S03</td></tr> <tr><td>1</td><td>0</td><td>S03</td></tr> <tr><td>1</td><td>0</td><td>S03</td></tr> <tr><td>1</td><td>1</td><td>S03</td></tr> <tr><td>1</td><td>0</td><td>S03</td></tr> <tr><td>1</td><td>1</td><td>S04</td></tr> <tr><td>1</td><td>0</td><td>S04</td></tr> <tr><td>4</td><td>0</td><td>S04</td></tr> <tr><td>1</td><td>1</td><td>S04</td></tr> <tr><td>1</td><td>1</td><td>S04</td></tr> <tr><td>2</td><td>0</td><td>S04</td></tr> <tr><td>2</td><td>1</td><td>S04</td></tr> <tr><td>5</td><td>0</td><td>S04</td></tr> <tr><td>1</td><td>1</td><td>S04</td></tr> <tr><td>2</td><td>1</td><td>S04</td></tr> <tr><td>1</td><td>1</td><td>S04</td></tr> <tr><td>1</td><td>1</td><td>S04</td></tr> </tbody> </table> | reads | mm | sample | 1 | 1 | S03 | 1 | 0 | S03 | 2 | 0 | S03 | 2 | 0 | S03 | 1 | 1 | S03 | 2 | 0 | S03 | 1 | 0 | S03 | 1 | 0 | S03 | 1 | 0 | S03 | 1 | 1 | S03 | 1 | 0 | S03 | 1 | 1 | S04 | 1 | 0 | S04 | 4 | 0 | S04 | 1 | 1 | S04 | 1 | 1 | S04 | 2 | 0 | S04 | 2 | 1 | S04 | 5 | 0 | S04 | 1 | 1 | S04 | 2 | 1 | S04 | 1 | 1 | S04 | 1 | 1 | S04 |
|--------------------------------------------------------------------------------------------------------------------------------------------------------------------------------------------------------------------------------------------------------------------------------------------------------------------------------------------------------------------------------------------------------------------------------------------------------------------------------------------------------------------------------------------------------------------------------------------------------------------------------------------------------------------------------------------------------------------------------------------------------------------------------------------------------------------------------------------------------------------------------------------------------------------------------------------|--------------------------------------------------------------------------------------------------------------------------------------------------------------------------------------------------------------------------------------------------------------------------------------------------------------------------------------------------------------------------------------------------------------------------------------------------------------------------------------------------------------------------------------------------------------------------|--------------------------------------------------------------------------------------------------------------------------------------------------------------------------------------------------------------------------------------------------------------------------------------------------------------------------------------------------------------------------------------------------------------------------------------------------------------------------------------------------------------------------------------------------------------------------------------------------------------------------------------------------------------------------------------------------------------------------------------------------------------------------------------------------------------------------------------------------------------------------------------------------------------------------------------------------------------------------------------------------------------------------------------------------------------------------------------------------------------------------------------------------|-------|----|--------|---|---|-----|---|---|-----|---|---|-----|---|---|-----|---|---|-----|---|---|-----|---|---|-----|---|---|-----|---|---|-----|---|---|-----|---|---|-----|---|---|-----|---|---|-----|---|---|-----|---|---|-----|---|---|-----|---|---|-----|---|---|-----|---|---|-----|---|---|-----|---|---|-----|---|---|-----|---|---|-----|
| reads                                                                                                                                                                                                                                                                                                                                                                                                                                                                                                                                                                                                                                                                                                                                                                                                                                                                                                                                      | mm                                                                                                                                                                                                                                                                                                                                                                                                                                                                                                                                                                       | sample                                                                                                                                                                                                                                                                                                                                                                                                                                                                                                                                                                                                                                                                                                                                                                                                                                                                                                                                                                                                                                                                                                                                           |       |    |        |   |   |     |   |   |     |   |   |     |   |   |     |   |   |     |   |   |     |   |   |     |   |   |     |   |   |     |   |   |     |   |   |     |   |   |     |   |   |     |   |   |     |   |   |     |   |   |     |   |   |     |   |   |     |   |   |     |   |   |     |   |   |     |   |   |     |   |   |     |
| 1                                                                                                                                                                                                                                                                                                                                                                                                                                                                                                                                                                                                                                                                                                                                                                                                                                                                                                                                          | 1                                                                                                                                                                                                                                                                                                                                                                                                                                                                                                                                                                        | S03                                                                                                                                                                                                                                                                                                                                                                                                                                                                                                                                                                                                                                                                                                                                                                                                                                                                                                                                                                                                                                                                                                                                              |       |    |        |   |   |     |   |   |     |   |   |     |   |   |     |   |   |     |   |   |     |   |   |     |   |   |     |   |   |     |   |   |     |   |   |     |   |   |     |   |   |     |   |   |     |   |   |     |   |   |     |   |   |     |   |   |     |   |   |     |   |   |     |   |   |     |   |   |     |   |   |     |
| 1                                                                                                                                                                                                                                                                                                                                                                                                                                                                                                                                                                                                                                                                                                                                                                                                                                                                                                                                          | 0                                                                                                                                                                                                                                                                                                                                                                                                                                                                                                                                                                        | S03                                                                                                                                                                                                                                                                                                                                                                                                                                                                                                                                                                                                                                                                                                                                                                                                                                                                                                                                                                                                                                                                                                                                              |       |    |        |   |   |     |   |   |     |   |   |     |   |   |     |   |   |     |   |   |     |   |   |     |   |   |     |   |   |     |   |   |     |   |   |     |   |   |     |   |   |     |   |   |     |   |   |     |   |   |     |   |   |     |   |   |     |   |   |     |   |   |     |   |   |     |   |   |     |   |   |     |
| 2                                                                                                                                                                                                                                                                                                                                                                                                                                                                                                                                                                                                                                                                                                                                                                                                                                                                                                                                          | 0                                                                                                                                                                                                                                                                                                                                                                                                                                                                                                                                                                        | S03                                                                                                                                                                                                                                                                                                                                                                                                                                                                                                                                                                                                                                                                                                                                                                                                                                                                                                                                                                                                                                                                                                                                              |       |    |        |   |   |     |   |   |     |   |   |     |   |   |     |   |   |     |   |   |     |   |   |     |   |   |     |   |   |     |   |   |     |   |   |     |   |   |     |   |   |     |   |   |     |   |   |     |   |   |     |   |   |     |   |   |     |   |   |     |   |   |     |   |   |     |   |   |     |   |   |     |
| 2                                                                                                                                                                                                                                                                                                                                                                                                                                                                                                                                                                                                                                                                                                                                                                                                                                                                                                                                          | 0                                                                                                                                                                                                                                                                                                                                                                                                                                                                                                                                                                        | S03                                                                                                                                                                                                                                                                                                                                                                                                                                                                                                                                                                                                                                                                                                                                                                                                                                                                                                                                                                                                                                                                                                                                              |       |    |        |   |   |     |   |   |     |   |   |     |   |   |     |   |   |     |   |   |     |   |   |     |   |   |     |   |   |     |   |   |     |   |   |     |   |   |     |   |   |     |   |   |     |   |   |     |   |   |     |   |   |     |   |   |     |   |   |     |   |   |     |   |   |     |   |   |     |   |   |     |
| 1                                                                                                                                                                                                                                                                                                                                                                                                                                                                                                                                                                                                                                                                                                                                                                                                                                                                                                                                          | 1                                                                                                                                                                                                                                                                                                                                                                                                                                                                                                                                                                        | S03                                                                                                                                                                                                                                                                                                                                                                                                                                                                                                                                                                                                                                                                                                                                                                                                                                                                                                                                                                                                                                                                                                                                              |       |    |        |   |   |     |   |   |     |   |   |     |   |   |     |   |   |     |   |   |     |   |   |     |   |   |     |   |   |     |   |   |     |   |   |     |   |   |     |   |   |     |   |   |     |   |   |     |   |   |     |   |   |     |   |   |     |   |   |     |   |   |     |   |   |     |   |   |     |   |   |     |
| 2                                                                                                                                                                                                                                                                                                                                                                                                                                                                                                                                                                                                                                                                                                                                                                                                                                                                                                                                          | 0                                                                                                                                                                                                                                                                                                                                                                                                                                                                                                                                                                        | S03                                                                                                                                                                                                                                                                                                                                                                                                                                                                                                                                                                                                                                                                                                                                                                                                                                                                                                                                                                                                                                                                                                                                              |       |    |        |   |   |     |   |   |     |   |   |     |   |   |     |   |   |     |   |   |     |   |   |     |   |   |     |   |   |     |   |   |     |   |   |     |   |   |     |   |   |     |   |   |     |   |   |     |   |   |     |   |   |     |   |   |     |   |   |     |   |   |     |   |   |     |   |   |     |   |   |     |
| 1                                                                                                                                                                                                                                                                                                                                                                                                                                                                                                                                                                                                                                                                                                                                                                                                                                                                                                                                          | 0                                                                                                                                                                                                                                                                                                                                                                                                                                                                                                                                                                        | S03                                                                                                                                                                                                                                                                                                                                                                                                                                                                                                                                                                                                                                                                                                                                                                                                                                                                                                                                                                                                                                                                                                                                              |       |    |        |   |   |     |   |   |     |   |   |     |   |   |     |   |   |     |   |   |     |   |   |     |   |   |     |   |   |     |   |   |     |   |   |     |   |   |     |   |   |     |   |   |     |   |   |     |   |   |     |   |   |     |   |   |     |   |   |     |   |   |     |   |   |     |   |   |     |   |   |     |
| 1                                                                                                                                                                                                                                                                                                                                                                                                                                                                                                                                                                                                                                                                                                                                                                                                                                                                                                                                          | 0                                                                                                                                                                                                                                                                                                                                                                                                                                                                                                                                                                        | S03                                                                                                                                                                                                                                                                                                                                                                                                                                                                                                                                                                                                                                                                                                                                                                                                                                                                                                                                                                                                                                                                                                                                              |       |    |        |   |   |     |   |   |     |   |   |     |   |   |     |   |   |     |   |   |     |   |   |     |   |   |     |   |   |     |   |   |     |   |   |     |   |   |     |   |   |     |   |   |     |   |   |     |   |   |     |   |   |     |   |   |     |   |   |     |   |   |     |   |   |     |   |   |     |   |   |     |
| 1                                                                                                                                                                                                                                                                                                                                                                                                                                                                                                                                                                                                                                                                                                                                                                                                                                                                                                                                          | 0                                                                                                                                                                                                                                                                                                                                                                                                                                                                                                                                                                        | S03                                                                                                                                                                                                                                                                                                                                                                                                                                                                                                                                                                                                                                                                                                                                                                                                                                                                                                                                                                                                                                                                                                                                              |       |    |        |   |   |     |   |   |     |   |   |     |   |   |     |   |   |     |   |   |     |   |   |     |   |   |     |   |   |     |   |   |     |   |   |     |   |   |     |   |   |     |   |   |     |   |   |     |   |   |     |   |   |     |   |   |     |   |   |     |   |   |     |   |   |     |   |   |     |   |   |     |
| 1                                                                                                                                                                                                                                                                                                                                                                                                                                                                                                                                                                                                                                                                                                                                                                                                                                                                                                                                          | 1                                                                                                                                                                                                                                                                                                                                                                                                                                                                                                                                                                        | S03                                                                                                                                                                                                                                                                                                                                                                                                                                                                                                                                                                                                                                                                                                                                                                                                                                                                                                                                                                                                                                                                                                                                              |       |    |        |   |   |     |   |   |     |   |   |     |   |   |     |   |   |     |   |   |     |   |   |     |   |   |     |   |   |     |   |   |     |   |   |     |   |   |     |   |   |     |   |   |     |   |   |     |   |   |     |   |   |     |   |   |     |   |   |     |   |   |     |   |   |     |   |   |     |   |   |     |
| 1                                                                                                                                                                                                                                                                                                                                                                                                                                                                                                                                                                                                                                                                                                                                                                                                                                                                                                                                          | 0                                                                                                                                                                                                                                                                                                                                                                                                                                                                                                                                                                        | S03                                                                                                                                                                                                                                                                                                                                                                                                                                                                                                                                                                                                                                                                                                                                                                                                                                                                                                                                                                                                                                                                                                                                              |       |    |        |   |   |     |   |   |     |   |   |     |   |   |     |   |   |     |   |   |     |   |   |     |   |   |     |   |   |     |   |   |     |   |   |     |   |   |     |   |   |     |   |   |     |   |   |     |   |   |     |   |   |     |   |   |     |   |   |     |   |   |     |   |   |     |   |   |     |   |   |     |
| 1                                                                                                                                                                                                                                                                                                                                                                                                                                                                                                                                                                                                                                                                                                                                                                                                                                                                                                                                          | 1                                                                                                                                                                                                                                                                                                                                                                                                                                                                                                                                                                        | S04                                                                                                                                                                                                                                                                                                                                                                                                                                                                                                                                                                                                                                                                                                                                                                                                                                                                                                                                                                                                                                                                                                                                              |       |    |        |   |   |     |   |   |     |   |   |     |   |   |     |   |   |     |   |   |     |   |   |     |   |   |     |   |   |     |   |   |     |   |   |     |   |   |     |   |   |     |   |   |     |   |   |     |   |   |     |   |   |     |   |   |     |   |   |     |   |   |     |   |   |     |   |   |     |   |   |     |
| 1                                                                                                                                                                                                                                                                                                                                                                                                                                                                                                                                                                                                                                                                                                                                                                                                                                                                                                                                          | 0                                                                                                                                                                                                                                                                                                                                                                                                                                                                                                                                                                        | S04                                                                                                                                                                                                                                                                                                                                                                                                                                                                                                                                                                                                                                                                                                                                                                                                                                                                                                                                                                                                                                                                                                                                              |       |    |        |   |   |     |   |   |     |   |   |     |   |   |     |   |   |     |   |   |     |   |   |     |   |   |     |   |   |     |   |   |     |   |   |     |   |   |     |   |   |     |   |   |     |   |   |     |   |   |     |   |   |     |   |   |     |   |   |     |   |   |     |   |   |     |   |   |     |   |   |     |
| 4                                                                                                                                                                                                                                                                                                                                                                                                                                                                                                                                                                                                                                                                                                                                                                                                                                                                                                                                          | 0                                                                                                                                                                                                                                                                                                                                                                                                                                                                                                                                                                        | S04                                                                                                                                                                                                                                                                                                                                                                                                                                                                                                                                                                                                                                                                                                                                                                                                                                                                                                                                                                                                                                                                                                                                              |       |    |        |   |   |     |   |   |     |   |   |     |   |   |     |   |   |     |   |   |     |   |   |     |   |   |     |   |   |     |   |   |     |   |   |     |   |   |     |   |   |     |   |   |     |   |   |     |   |   |     |   |   |     |   |   |     |   |   |     |   |   |     |   |   |     |   |   |     |   |   |     |
| 1                                                                                                                                                                                                                                                                                                                                                                                                                                                                                                                                                                                                                                                                                                                                                                                                                                                                                                                                          | 1                                                                                                                                                                                                                                                                                                                                                                                                                                                                                                                                                                        | S04                                                                                                                                                                                                                                                                                                                                                                                                                                                                                                                                                                                                                                                                                                                                                                                                                                                                                                                                                                                                                                                                                                                                              |       |    |        |   |   |     |   |   |     |   |   |     |   |   |     |   |   |     |   |   |     |   |   |     |   |   |     |   |   |     |   |   |     |   |   |     |   |   |     |   |   |     |   |   |     |   |   |     |   |   |     |   |   |     |   |   |     |   |   |     |   |   |     |   |   |     |   |   |     |   |   |     |
| 1                                                                                                                                                                                                                                                                                                                                                                                                                                                                                                                                                                                                                                                                                                                                                                                                                                                                                                                                          | 1                                                                                                                                                                                                                                                                                                                                                                                                                                                                                                                                                                        | S04                                                                                                                                                                                                                                                                                                                                                                                                                                                                                                                                                                                                                                                                                                                                                                                                                                                                                                                                                                                                                                                                                                                                              |       |    |        |   |   |     |   |   |     |   |   |     |   |   |     |   |   |     |   |   |     |   |   |     |   |   |     |   |   |     |   |   |     |   |   |     |   |   |     |   |   |     |   |   |     |   |   |     |   |   |     |   |   |     |   |   |     |   |   |     |   |   |     |   |   |     |   |   |     |   |   |     |
| 2                                                                                                                                                                                                                                                                                                                                                                                                                                                                                                                                                                                                                                                                                                                                                                                                                                                                                                                                          | 0                                                                                                                                                                                                                                                                                                                                                                                                                                                                                                                                                                        | S04                                                                                                                                                                                                                                                                                                                                                                                                                                                                                                                                                                                                                                                                                                                                                                                                                                                                                                                                                                                                                                                                                                                                              |       |    |        |   |   |     |   |   |     |   |   |     |   |   |     |   |   |     |   |   |     |   |   |     |   |   |     |   |   |     |   |   |     |   |   |     |   |   |     |   |   |     |   |   |     |   |   |     |   |   |     |   |   |     |   |   |     |   |   |     |   |   |     |   |   |     |   |   |     |   |   |     |
| 2                                                                                                                                                                                                                                                                                                                                                                                                                                                                                                                                                                                                                                                                                                                                                                                                                                                                                                                                          | 1                                                                                                                                                                                                                                                                                                                                                                                                                                                                                                                                                                        | S04                                                                                                                                                                                                                                                                                                                                                                                                                                                                                                                                                                                                                                                                                                                                                                                                                                                                                                                                                                                                                                                                                                                                              |       |    |        |   |   |     |   |   |     |   |   |     |   |   |     |   |   |     |   |   |     |   |   |     |   |   |     |   |   |     |   |   |     |   |   |     |   |   |     |   |   |     |   |   |     |   |   |     |   |   |     |   |   |     |   |   |     |   |   |     |   |   |     |   |   |     |   |   |     |   |   |     |
| 5                                                                                                                                                                                                                                                                                                                                                                                                                                                                                                                                                                                                                                                                                                                                                                                                                                                                                                                                          | 0                                                                                                                                                                                                                                                                                                                                                                                                                                                                                                                                                                        | S04                                                                                                                                                                                                                                                                                                                                                                                                                                                                                                                                                                                                                                                                                                                                                                                                                                                                                                                                                                                                                                                                                                                                              |       |    |        |   |   |     |   |   |     |   |   |     |   |   |     |   |   |     |   |   |     |   |   |     |   |   |     |   |   |     |   |   |     |   |   |     |   |   |     |   |   |     |   |   |     |   |   |     |   |   |     |   |   |     |   |   |     |   |   |     |   |   |     |   |   |     |   |   |     |   |   |     |
| 1                                                                                                                                                                                                                                                                                                                                                                                                                                                                                                                                                                                                                                                                                                                                                                                                                                                                                                                                          | 1                                                                                                                                                                                                                                                                                                                                                                                                                                                                                                                                                                        | S04                                                                                                                                                                                                                                                                                                                                                                                                                                                                                                                                                                                                                                                                                                                                                                                                                                                                                                                                                                                                                                                                                                                                              |       |    |        |   |   |     |   |   |     |   |   |     |   |   |     |   |   |     |   |   |     |   |   |     |   |   |     |   |   |     |   |   |     |   |   |     |   |   |     |   |   |     |   |   |     |   |   |     |   |   |     |   |   |     |   |   |     |   |   |     |   |   |     |   |   |     |   |   |     |   |   |     |
| 2                                                                                                                                                                                                                                                                                                                                                                                                                                                                                                                                                                                                                                                                                                                                                                                                                                                                                                                                          | 1                                                                                                                                                                                                                                                                                                                                                                                                                                                                                                                                                                        | S04                                                                                                                                                                                                                                                                                                                                                                                                                                                                                                                                                                                                                                                                                                                                                                                                                                                                                                                                                                                                                                                                                                                                              |       |    |        |   |   |     |   |   |     |   |   |     |   |   |     |   |   |     |   |   |     |   |   |     |   |   |     |   |   |     |   |   |     |   |   |     |   |   |     |   |   |     |   |   |     |   |   |     |   |   |     |   |   |     |   |   |     |   |   |     |   |   |     |   |   |     |   |   |     |   |   |     |
| 1                                                                                                                                                                                                                                                                                                                                                                                                                                                                                                                                                                                                                                                                                                                                                                                                                                                                                                                                          | 1                                                                                                                                                                                                                                                                                                                                                                                                                                                                                                                                                                        | S04                                                                                                                                                                                                                                                                                                                                                                                                                                                                                                                                                                                                                                                                                                                                                                                                                                                                                                                                                                                                                                                                                                                                              |       |    |        |   |   |     |   |   |     |   |   |     |   |   |     |   |   |     |   |   |     |   |   |     |   |   |     |   |   |     |   |   |     |   |   |     |   |   |     |   |   |     |   |   |     |   |   |     |   |   |     |   |   |     |   |   |     |   |   |     |   |   |     |   |   |     |   |   |     |   |   |     |
| 1                                                                                                                                                                                                                                                                                                                                                                                                                                                                                                                                                                                                                                                                                                                                                                                                                                                                                                                                          | 1                                                                                                                                                                                                                                                                                                                                                                                                                                                                                                                                                                        | S04                                                                                                                                                                                                                                                                                                                                                                                                                                                                                                                                                                                                                                                                                                                                                                                                                                                                                                                                                                                                                                                                                                                                              |       |    |        |   |   |     |   |   |     |   |   |     |   |   |     |   |   |     |   |   |     |   |   |     |   |   |     |   |   |     |   |   |     |   |   |     |   |   |     |   |   |     |   |   |     |   |   |     |   |   |     |   |   |     |   |   |     |   |   |     |   |   |     |   |   |     |   |   |     |   |   |     |







Mature

Star

| Sequence                           | Mature Count | Star Count | Label |
|------------------------------------|--------------|------------|-------|
| .....aaaacucuaucgucgucAgaaUUU..... | 1            | 1          | S04   |
| .....aaaacucuaucgucgucggaUUUC..... | 1            | 1          | S04   |
| .....aaacucuaucgucgucAgaaUUU.....  | 1            | 1          | S04   |
| .....aaacucuaucgucgucggaUUUU.....  | 1            | 0          | S04   |
| .....aaacucuaucgucgucggaUUUUC..... | 2            | 0          | S04   |
| .....aacucuaucgucgucggaUUUU.....   | 1            | 0          | S04   |
| .....aacucuaucgucgucggaUUUUC.....  | 1            | 0          | S04   |
| .....acucuaucgucgucggaUUUUC.....   | 1            | 0          | S04   |
| .....acucuaucgucgucggaUUUUCU.....  | 1            | 1          | S04   |
| .....acucuaucgucgucggaUUUUCU.....  | 1            | 0          | S04   |
| .....acucuaucgucgucggaUUUUCU.....  | 1            | 1          | S04   |
| .....cucuaucgucgucggaUUUUCU.....   | 1            | 1          | S04   |
| .....cucuaucgucgucggaUUUUCU.....   | 1            | 0          | S04   |
| .....cucuaucgucgucggaUUUUCU.....   | 1            | 1          | S04   |
| .....ucuaucgucgucggaUUUUCU.....    | 1            | 1          | S04   |
| .....ucuaucgucgucggaUUUUCU.....    | 1            | 0          | S04   |
| .....ucuaucgucgucggaUUUUCG.....    | 1            | 1          | S04   |
| .....ucuaucgucgucggaUUUUCUC.....   | 1            | 0          | S04   |
| .....ucuaucgucgucggaUUUUCUCG.....  | 3            | 0          | S04   |
| .....cuaucgucgucggaUUUUCG.....     | 1            | 1          | S04   |
| .....cuaucgucgucggaUUUUCUCG.....   | 1            | 0          | S04   |
| .....uaucgucgucggaUUUUCU.....      | 1            | 0          | S04   |
| .....uaucgucgucggaUUUUCUC.....     | 1            | 1          | S04   |
| .....uaucgucgucggaUUUUCUCG.....    | 1            | 0          | S04   |
| .....uaucgucgucggaUUUUCUCU.....    | 1            | 1          | S04   |
| .....uaucgucgucggaUUUUCUCG.....    | 1            | 0          | S04   |
| .....aucgucgucggaUUUUCU.....       | 1            | 1          | S04   |
| .....aucgucgucggaUUUUCUCG.....     | 2            | 0          | S04   |
| .....aucgucgucggaUUUUCUCG.....     | 1            | 1          | S04   |
| .....aucgucgucggaUUUUCUCG.....     | 2            | 0          | S04   |
| .....ucgucgucggaUUUUCUC.....       | 1            | 1          | S04   |
| .....cgucgucggaUUUUCUCG.....       | 1            | 0          | S04   |
| .....cgucggaUUUUCUCG.....          | 1            | 0          | S04   |
| .....UucggaUUUUCUCG.....           | 1            | 1          | S04   |
| .....ucggaUUUUCUCG.....            | 1            | 0          | S04   |
| .....ucggaUUUUCUCG.....            | 1            | 1          | S04   |
| .....ggaaaUUCGggaUUUCUg.....       | 1            | 1          | S04   |
| .....ggaaaUUCGggaUUUCUg.....       | 1            | 1          | S04   |
| .....gaaaCuucgaggaUUUCG.....       | 1            | 1          | S04   |
| .....aaaUUCGggaUUUCG.....          | 3            | 0          | S04   |
| .....auucgaggaUUUCG.....           | 4            | 0          | S04   |
| .....gaggaaaUUCGgga.....           | 1            | 0          | S04   |



Provisional ID : chrA09\_825457  
 Score total : 5.2  
 Score for star read(s) : 3.9  
 Score for read counts : -0.3  
 Score for mfe : 1.7  
 Score for randfold : 0  
 Score for cons. seed :  
 Total read count : 11  
 Mature read count : 9  
 Loop read count : 1  
 Star read count : 1

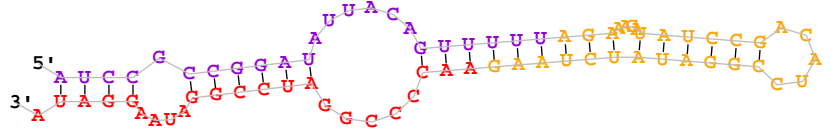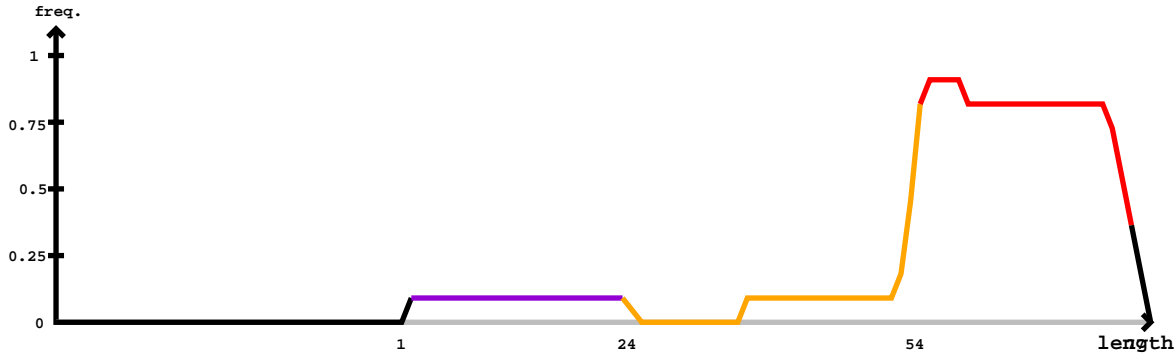

**Star**

**Mature**

|                                                                                                      |                                  |                                  |                                  |       |     |        |  |
|------------------------------------------------------------------------------------------------------|----------------------------------|----------------------------------|----------------------------------|-------|-----|--------|--|
| 5' - uuauuuuuuuuaggauucaaaucuggaucggaau                                                              | aucgccggauuuacaguuuuu            | agaagauaucggacaucggauucuaaga     | aaccgccggaucggauaaggauag         | -3'   | obs |        |  |
| uuauuuuuuuuaggauucaaaucuggaucggaau                                                                   | uccgccggauuuacaguuuuu            | uagaagauaucggacaucggauucuaaga    | aaccgccggaucggauaaggauag         |       | exp |        |  |
| .....(((((((.....)))))).....(((((((.....(((((((.....(((((((.....))))))))).....)))))).....))))))..... | .....aucgccggauuuacaguuuuu.....  | .....gacauccggauucuaagaaccU..... | .....aaccgccggaucggauaaggau..... | reads | mm  | sample |  |
| .....aucgccggauuuacaguuuuu.....                                                                      | .....gacauccggauucuaagaaccU..... | .....aaccgccggaucggauaaggau..... | .....aaccgccggaucggauaaggau..... | 1     | 1   | S03    |  |
| .....aucgccggauuuacaguuuuu.....                                                                      | .....gacauccggauucuaagaaccU..... | .....aaccgccggaucggauaaggau..... | .....aaccgccggaucggauaaggau..... | 1     | 0   | S03    |  |
| .....aucgccggauuuacaguuuuu.....                                                                      | .....gacauccggauucuaagaaccU..... | .....aaccgccggaucggauaaggau..... | .....aaccgccggaucggauaaggau..... | 1     | 0   | S03    |  |
| .....aucgccggauuuacaguuuuu.....                                                                      | .....gacauccggauucuaagaaccU..... | .....aaccgccggaucggauaaggau..... | .....aaccgccggaucggauaaggau..... | 1     | 0   | S03    |  |
| .....aucgccggauuuacaguuuuu.....                                                                      | .....gacauccggauucuaagaaccU..... | .....aaccgccggaucggauaaggau..... | .....aaccgccggaucggauaaggau..... | 1     | 1   | S04    |  |
| .....aucgccggauuuacaguuuuu.....                                                                      | .....gacauccggauucuaagaaccU..... | .....aaccgccggaucggauaaggau..... | .....aaccgccggaucggauaaggau..... | 1     | 0   | S04    |  |
| .....aucgccggauuuacaguuuuu.....                                                                      | .....gacauccggauucuaagaaccU..... | .....aaccgccggaucggauaaggau..... | .....aaccgccggaucggauaaggau..... | 1     | 1   | S04    |  |
| .....aucgccggauuuacaguuuuu.....                                                                      | .....gacauccggauucuaagaaccU..... | .....aaccgccggaucggauaaggau..... | .....aaccgccggaucggauaaggau..... | 3     | 0   | S04    |  |



Provisional ID : chrA09\_848786  
 Score total : 1.3  
 Score for star read(s) : 3.9  
 Score for read counts : -3.3  
 Score for mfe : 0.9  
 Score for randfold : 0  
 Score for cons. seed :  
 Total read count : 5  
 Mature read count : 4  
 Loop read count : 0  
 Star read count : 1

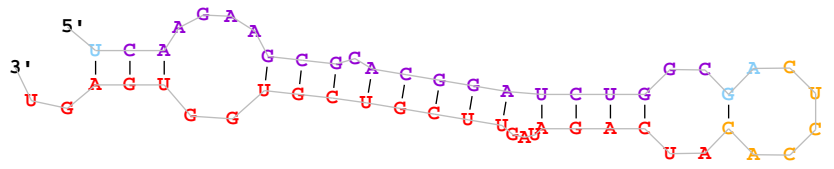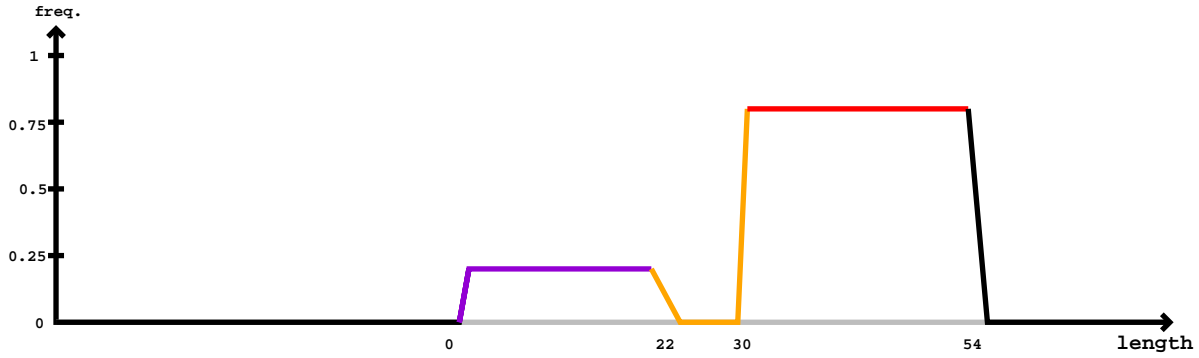

Star
Mature

|                                                                                                                                                                                                                                                                                                                                                                                                                                                                                                                                                              |     |       |    |        |
|--------------------------------------------------------------------------------------------------------------------------------------------------------------------------------------------------------------------------------------------------------------------------------------------------------------------------------------------------------------------------------------------------------------------------------------------------------------------------------------------------------------------------------------------------------------|-----|-------|----|--------|
| 5' - gguguuguuuaucaucauaaaagugugaagaugucaugacccu <span style="color: purple;">caagaagcgcacggaucuggc</span> <span style="color: red;">gaucuccacaucaagauaguucgucguggugagu</span> uuggucacgcucgacauguu<br>gguguuguuuaucaucauaaaagugugaagaugucaugacccu <span style="color: purple;">caagaagcgcacggaucuggcga</span> <span style="color: red;">cuccacaucaagauaguucgucguggugagu</span> uuggucacgcucgacauguu<br>.(((((((.....)))))).....(((((((.....(((.....)))))).....)))))).....)))))).....)))))).....)))))).....)))))).....<br>.....aucagauaguucgucguggugagu..... | -3' | obs   |    |        |
|                                                                                                                                                                                                                                                                                                                                                                                                                                                                                                                                                              |     | exp   |    |        |
|                                                                                                                                                                                                                                                                                                                                                                                                                                                                                                                                                              |     | reads | mm | sample |
|                                                                                                                                                                                                                                                                                                                                                                                                                                                                                                                                                              |     | 1     | 0  | S03    |
| ..... <span style="color: purple;">caagaagcgcacggaucuggc</span> .....                                                                                                                                                                                                                                                                                                                                                                                                                                                                                        |     |       |    |        |
|                                                                                                                                                                                                                                                                                                                                                                                                                                                                                                                                                              |     | 1     | 0  | S04    |
| .....aucagauaguucgucguggugagu.....                                                                                                                                                                                                                                                                                                                                                                                                                                                                                                                           |     |       |    |        |
|                                                                                                                                                                                                                                                                                                                                                                                                                                                                                                                                                              |     | 3     | 0  | S04    |





Provisional ID : chrA09\_880769  
 Score total : 0.8  
 Score for star read(s) : 3.9  
 Score for read counts : -4.9  
 Score for mfe : 1.9  
 Score for randfold : 0  
 Score for cons. seed :  
 Total read count : 2  
 Mature read count : 1  
 Loop read count : 0  
 Star read count : 1

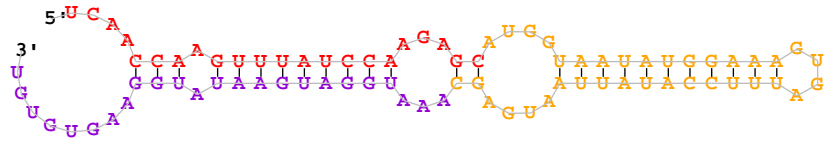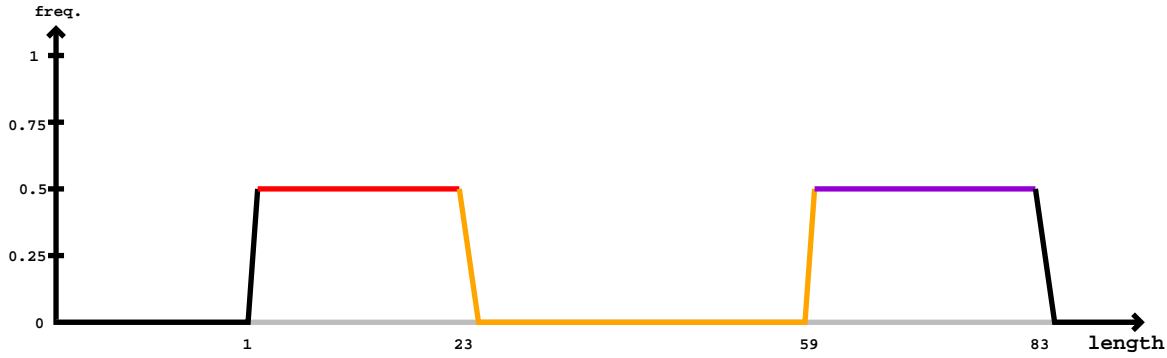

**Mature**

**Star**

|      |                                                                                                                                 |       |     |        |     |
|------|---------------------------------------------------------------------------------------------------------------------------------|-------|-----|--------|-----|
| 5' - | aacaaucaugacccccuac <u>ucaaccaaguuuauccaagagca</u> ugguaauauggaagugauuuccauuuauaugagca <u>aauggaagaauuggaagugugu</u> caagaggggg | -3'   | obs |        |     |
|      | aacaaucaugacccccuac <u>ucaaccaaguuuauccaagagca</u> ugguaauauggaagugauuuccauuuauaugagc <u>aauggaagaauuggaagugugu</u> caagaggggg  |       | exp |        |     |
|      | .....(((((((.....(((.....((((((((.....(((.....((((((((.....)))))))))).....)))))))).....)))))))).....)))))).....)))))).....      | reads | mm  | sample |     |
|      | .....ucaaccaaguuuauccaagagU.....                                                                                                | 1     | 1   |        | S03 |
|      | .....aaauggaagaauuggaagugugu.....                                                                                               | 1     | 0   |        | S04 |

Provisional ID : chrA09\_882837  
 Score total : 0  
 Score for star read(s) : 3.9  
 Score for read counts : -4.9  
 Score for mfe : 1  
 Score for randfold : 0  
 Score for cons. seed :  
 Total read count : 2  
 Mature read count : 1  
 Loop read count : 0  
 Star read count : 1

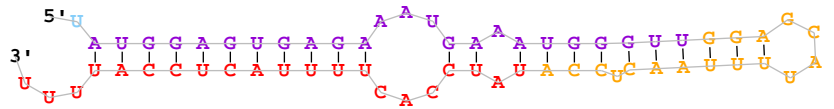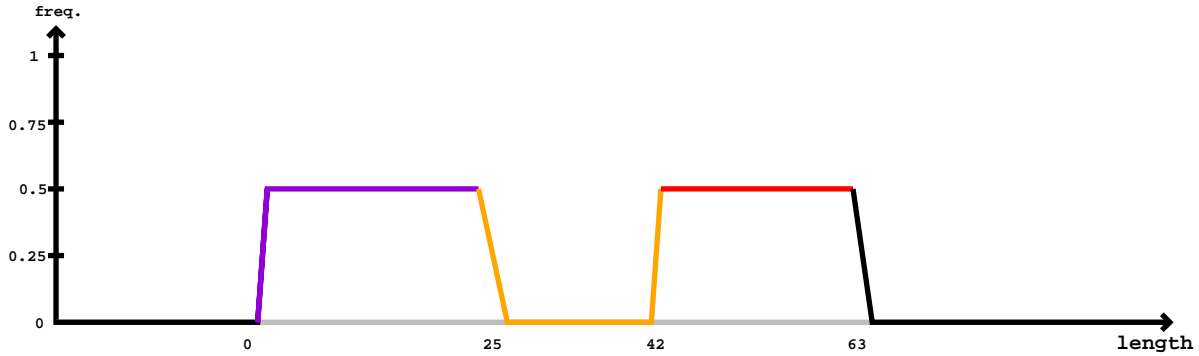

Star

Mature

| 5'   | Star                  | Mature                  | -3'                                    | obs                            | exp   | reads | mm | sample |
|------|-----------------------|-------------------------|----------------------------------------|--------------------------------|-------|-------|----|--------|
| 5' - | uguuuguuuuuuuacuccauu | auggagugagaaaugaaaugggu | ggagcauuuuuacuccauuuccacuuuuacuccauuuu | ggaagaaaaauagaguuuacauuggagaug | -3'   | 1     | 0  | S04    |
|      | uguuuguuuuuuuacuccauu | auggagugagaaaugaaaugggu | ggagcauuuuuacuccauuuccacuuuuacuccauuuu | ggaagaaaaauagaguuuacauuggagaug | exp   | 1     | 0  | S04    |
|      | .....                 | .....                   | .....                                  | .....                          | reads | 1     | 0  | S04    |
|      | .....                 | .....                   | .....                                  | .....                          | exp   | 1     | 0  | S04    |

Provisional ID : chrA09\_884500  
 Score total : 0  
 Score for star read(s) : -1.3  
 Score for read counts : -0.3  
 Score for mfe : 1.7  
 Score for randfold : 0  
 Score for cons. seed :  
 Total read count : 11  
 Mature read count : 6  
 Loop read count : 5  
 Star read count : 0

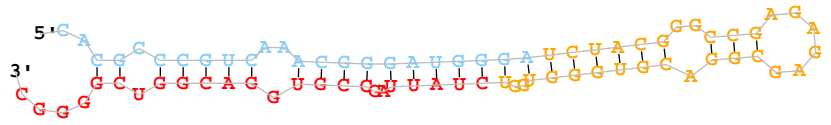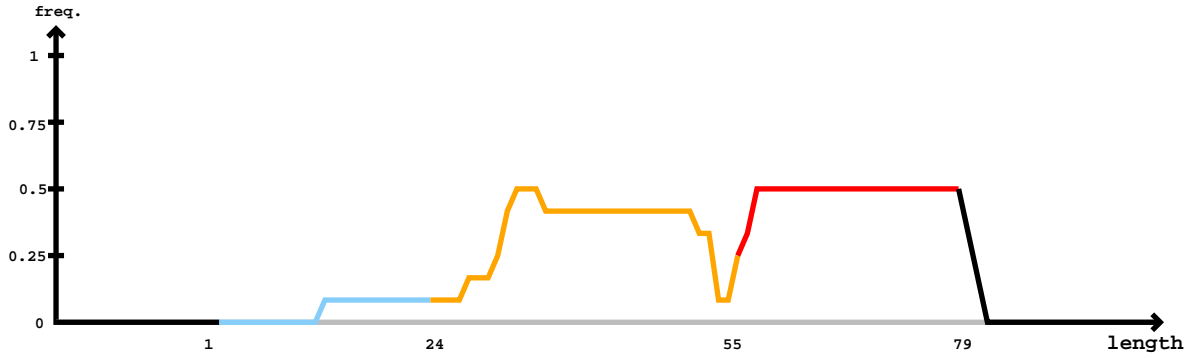

**Star**

**Mature**

| 5' -                                                                                                                                      | 3' | exp | reads | mm | sample |
|-------------------------------------------------------------------------------------------------------------------------------------------|----|-----|-------|----|--------|
| uuggaaaaauaacg <b>cacgcccgucaaacgggauggga</b> ucua <b>cgggccgagagagcggacguggguggu</b> cuauuag <b>ccguggacggucggggc</b> guuacaagaagacaagua |    |     |       |    |        |
| .....(((((((.....)))))).....)                                                                                                             |    |     | 1     | 1  | S03    |
| .....aacgggaugggauc <b>Cacggg</b> cgc.....                                                                                                |    |     | 1     | 1  | S03    |
| .....acggA <b>ccgagagagcggacguggg</b> .....                                                                                               |    |     | 1     | 1  | S03    |
| .....ggcUgagagag <b>cggacgugggug</b> .....                                                                                                |    |     | 1     | 1  | S04    |
| .....gcUgagagag <b>cggacgugggug</b> .....                                                                                                 |    |     | 1     | 1  | S04    |
| .....gccgaAagag <b>cggacguggguggu</b> .....                                                                                               |    |     | 1     | 0  | S04    |
| .....ccgagagag <b>cggacgugggug</b> .....                                                                                                  |    |     | 2     | 0  | S04    |
| .....cuauuag <b>ccguggacggucggggc</b> .....                                                                                               |    |     | 1     | 1  | S04    |
| .....cuauuag <b>ccguggacggucggggU</b> .....                                                                                               |    |     | 1     | 1  | S04    |
| .....Cauuag <b>ccguggacggucggggc</b> .....                                                                                                |    |     | 1     | 0  | S04    |
| .....auuag <b>ccguggacggucggggcgu</b> .....                                                                                               |    |     | 1     | 1  | S04    |
| .....auuag <b>ccguggacggucgggC</b> gu.....                                                                                                |    |     | 1     | 1  | S04    |





Star

Mature

|                                                                                                                    |    |   |     |
|--------------------------------------------------------------------------------------------------------------------|----|---|-----|
| uauaaaauuguggccgcgaaaaaacuuuuuauucgugucgguugaagcccaugcuaucucugcuuguggccagggucgacacugaaacugacgucaagaugaagaucgugaagu |    |   |     |
| .....acugacgucaagaugaagaucG.....                                                                                   | 1  | 1 | S03 |
| .....acugacgucaagaugaagaucU.....                                                                                   | 1  | 1 | S03 |
| .....acugacgucaagaugaagaucgug.....                                                                                 | 9  | 0 | S03 |
| .....acugacgucaagaugaagaaCaucgug.....                                                                              | 1  | 1 | S03 |
| .....cugacgucaagaugaagauc.....                                                                                     | 2  | 0 | S03 |
| .....cugacgucaagaugaagaucU.....                                                                                    | 1  | 1 | S03 |
| .....cugacgucaagaugaagaucgug.....                                                                                  | 7  | 0 | S03 |
| .....cugacgucaagaugaagaucgAg.....                                                                                  | 1  | 1 | S03 |
| .....cugacgucaagaugaagaucguU.....                                                                                  | 1  | 1 | S03 |
| .....cugacgucaagaugaagaucguga.....                                                                                 | 5  | 0 | S03 |
| .....ugacgucaagaugaagaucGgauc.....                                                                                 | 1  | 1 | S03 |
| .....ugacgucaagaugaagaucguga.....                                                                                  | 1  | 0 | S03 |
| .....gacgucaagaugaagaucgugaag.....                                                                                 | 2  | 0 | S03 |
| .....agaugGagaucgugaagu.....                                                                                       | 1  | 1 | S03 |
| .....aauauguggccgcgaaaaaacuu.....                                                                                  | 1  | 0 | S04 |
| .....uauuguggccgcgaaaaaacuuuu.....                                                                                 | 1  | 0 | S04 |
| .....auguggccgcgaaaaaacuuuu.....                                                                                   | 1  | 0 | S04 |
| .....auguggccgcgaaaaaacuuuuu.....                                                                                  | 2  | 0 | S04 |
| .....uguggccgcgaaaaaacuuuu.....                                                                                    | 1  | 0 | S04 |
| .....uguggccgcgaaaaaacuuuuu.....                                                                                   | 1  | 0 | S04 |
| .....aaaauuuuuuauucgugucggu.....                                                                                   | 1  | 0 | S04 |
| .....aaauuuuuuuuauucgugucgg.....                                                                                   | 1  | 0 | S04 |
| .....cuuuuuuauucguguUggguuggaag.....                                                                               | 1  | 1 | S04 |
| .....uuuuuuuauucguguUggguuggaa.....                                                                                | 1  | 1 | S04 |
| .....uuugggccagggucgacacuga.....                                                                                   | 1  | 0 | S04 |
| .....guggccaUggucgacacugaacu.....                                                                                  | 1  | 1 | S04 |
| .....ccagggucgacacugaacugacgA.....                                                                                 | 1  | 1 | S04 |
| .....ucgacacugaacugacgucaag.....                                                                                   | 1  | 0 | S04 |
| .....cgacacugaacugacgucaagaug.....                                                                                 | 4  | 0 | S04 |
| .....acacugaacugacgucaagaugaa.....                                                                                 | 2  | 0 | S04 |
| .....cacugaacugacgucaagaug.....                                                                                    | 1  | 0 | S04 |
| .....cacugaacugacgucaagauga.....                                                                                   | 2  | 0 | S04 |
| .....cacugaacugacgucaagaugU.....                                                                                   | 1  | 1 | S04 |
| .....acugaacugacgucaagaugU.....                                                                                    | 1  | 1 | S04 |
| .....acuUaacugacgucaagauga.....                                                                                    | 1  | 1 | S04 |
| .....acugaacugacgucaagaugaaga.....                                                                                 | 6  | 0 | S04 |
| .....cuUaacugacgucaagauga.....                                                                                     | 1  | 1 | S04 |
| .....cugaacugacgucaagaugaaga.....                                                                                  | 1  | 0 | S04 |
| .....cugaacugacgucaagaugaagu.....                                                                                  | 3  | 0 | S04 |
| .....ugaacugacgucaagauga.....                                                                                      | 3  | 0 | S04 |
| .....ugaacugacgucaagaugaaga.....                                                                                   | 1  | 0 | S04 |
| .....ugaacugacgucaagaugaagau.....                                                                                  | 3  | 0 | S04 |
| .....ugaacCgacgucaagaugaagauc.....                                                                                 | 1  | 1 | S04 |
| .....ugaacugacgucaagaugaagauc.....                                                                                 | 39 | 0 | S04 |
| .....ugCacugacgucaagaugaagauc.....                                                                                 | 1  | 1 | S04 |
| .....ugaacugacgucaagaugaagauA.....                                                                                 | 1  | 1 | S04 |
| .....ugGacugacgucaagaugaagauc.....                                                                                 | 1  | 1 | S04 |
| .....gaacugacgucaagauga.....                                                                                       | 2  | 0 | S04 |
| .....gaacugacgucaagaugaag.....                                                                                     | 1  | 0 | S04 |
| .....gaacugacgucaagaugaagauc.....                                                                                  | 8  | 0 | S04 |
| .....gaacugacgucaagaugaagaucg.....                                                                                 | 18 | 0 | S04 |
| .....gaaAugacgucaagaugaagaucg.....                                                                                 | 1  | 1 | S04 |
| .....aacugacgucaagaugaagau.....                                                                                    | 2  | 0 | S04 |
| .....aacugacgucaagaugaagauc.....                                                                                   | 14 | 0 | S04 |
| .....aacugacgucaagaugaagaucg.....                                                                                  | 6  | 0 | S04 |
| .....aacugacgucaagaugaagaucgu.....                                                                                 | 3  | 0 | S04 |
| .....aaAugacgucaagaugaagaucgu.....                                                                                 | 1  | 1 | S04 |
| .....aacugacgucaagaugaagaucguU.....                                                                                | 1  | 1 | S04 |
| .....acugacgucaagaugaagau.....                                                                                     | 1  | 0 | S04 |
| .....acugacgucaagaugaagauc.....                                                                                    | 6  | 0 | S04 |
| .....acugacgucaagaugaagauA.....                                                                                    | 1  | 1 | S04 |
| .....acugacgucaagaugaagaucg.....                                                                                   | 10 | 0 | S04 |
| .....acugacgucaagaugaagaucU.....                                                                                   | 1  | 1 | S04 |
| .....acugacgucaagaugGagaucgug.....                                                                                 | 1  | 1 | S04 |
| .....acugacgGcaagaugaagaucgug.....                                                                                 | 1  | 1 | S04 |
| .....acugacgucaagaugaagaucgug.....                                                                                 | 19 | 0 | S04 |
| .....cugacgucaagaugaagaucU.....                                                                                    | 2  | 1 | S04 |
| .....cugacgucaagaugaagaucgA.....                                                                                   | 1  | 1 | S04 |
| .....cugacgucaagaugaagaucUug.....                                                                                  | 1  | 1 | S04 |

Star

Mature

|                                                                                                                  |    |   |     |
|------------------------------------------------------------------------------------------------------------------|----|---|-----|
| uauaaaauuguggccgcaaaaacuuuuuucgugucggguuggaagcccaugcua cuucugcuuguggccagggucgacacugaacugacgucaagaugaagaucgugaagu |    |   |     |
| .....cugacgucaagaugaagaucgug...                                                                                  | 7  | 0 | S04 |
| .....cugacgucaagaugaagaucgGga...                                                                                 | 1  | 1 | S04 |
| .....cugacgucaagaugaagaucguga...                                                                                 | 13 | 0 | S04 |
| .....cugacgucaagaugaagaucgU...                                                                                   | 2  | 1 | S04 |
| .....cugacgucaagaugaagaucgugaa..                                                                                 | 1  | 0 | S04 |
| .....ugacgucaagaugaagaucgug...                                                                                   | 1  | 0 | S04 |
| .....Cgacgucaagaugaagaucguga...                                                                                  | 1  | 1 | S04 |
| .....ugacgucaagaugaagaucgugaa..                                                                                  | 2  | 0 | S04 |
| .....gacgucaagaugaagaucgug...                                                                                    | 2  | 0 | S04 |
| .....gacgucaagaugaagaucguga...                                                                                   | 2  | 0 | S04 |
| .....gacgucaagaugaagaucgugaa..                                                                                   | 2  | 0 | S04 |
| .....cgucaagGugaagaucgugaagu                                                                                     | 1  | 1 | S04 |





Star

Mature

|                                               |                         |                                             |    |   |     |
|-----------------------------------------------|-------------------------|---------------------------------------------|----|---|-----|
| acugcgguuugagcggugcauaacaagcgguucaauugcggugcg | uuuuuacaguuuaaaaauguuag | gauauuaauauuaguagagauuuuuuguuacuguuuacugcgg |    |   |     |
| .....                                         |                         | .....gagauuuuuuguuacuguuuacu...             | 7  | 0 | S04 |
| .....                                         |                         | .....gagauuuuuuguuacuguuuacug...            | 4  | 0 | S04 |
| .....                                         |                         | .....gagauuuuuuguuacuguuuacugc...           | 11 | 0 | S04 |
| .....                                         |                         | .....agauuuuuuguuacuguuuacu...              | 1  | 0 | S04 |
| .....                                         |                         | .....agauuuuuuguuacuguuuacug...             | 2  | 0 | S04 |
| .....                                         |                         | .....agauuuuuuguuacuguuuacugc...            | 2  | 0 | S04 |
| .....                                         |                         | .....agauuuuuuguuacuguuuacugcg.             | 10 | 0 | S04 |
| .....                                         |                         | .....gauuuuuuguuacuguuuacug...              | 6  | 0 | S04 |
| .....                                         |                         | .....gauuuuuuguuacuguuuacugc...             | 2  | 0 | S04 |
| .....                                         |                         | .....gauuuuuuguuacuguuuacugcgg              | 51 | 0 | S04 |
| .....                                         |                         | .....gauuuuuuguuacugCuaacugcgg              | 1  | 1 | S04 |
| .....                                         |                         | .....gauuuuuuguuacuguuuacugcgg              | 2  | 1 | S04 |
| .....                                         |                         | .....gauuuuuuguuacuguuuacugcGC              | 1  | 1 | S04 |
| .....                                         |                         | .....auuuuuuguuacuguuuacug...               | 2  | 0 | S04 |
| .....                                         |                         | .....auuuuuuguuacuguuuacugc...              | 1  | 0 | S04 |
| .....                                         |                         | .....auuuuuuguuacuguuuacugcg.               | 2  | 0 | S04 |
| .....                                         |                         | .....auuuuuuguuacuguuuacugcgg               | 6  | 0 | S04 |
| .....                                         |                         | .....uuuuuuuguuacuguuuacu...                | 1  | 0 | S04 |
| .....                                         |                         | .....uuuuuuuguuacuguuuacugc...              | 3  | 0 | S04 |
| .....                                         |                         | .....uuuuuuuguuacuguuuacugcg.               | 2  | 0 | S04 |
| .....                                         |                         | .....uuuuuuuguuacuguuuacugcgg               | 7  | 0 | S04 |
| .....                                         |                         | .....uuuuuuuguuacuguuuacugcgg               | 5  | 0 | S04 |
| .....                                         |                         | .....uuguuacuguuuacugcgg                    | 3  | 0 | S04 |
| .....                                         |                         | .....uuguuacuguuuacugcGC                    | 1  | 1 | S04 |













Provisional ID : chrA09\_random\_2761059  
 Score total : 0.4  
 Score for star read(s) : -1.3  
 Score for read counts : 0  
 Score for mfe : 1.7  
 Score for randfold : 0  
 Score for cons. seed :  
 Total read count : 470  
 Mature read count : 470  
 Loop read count : 0  
 Star read count : 0

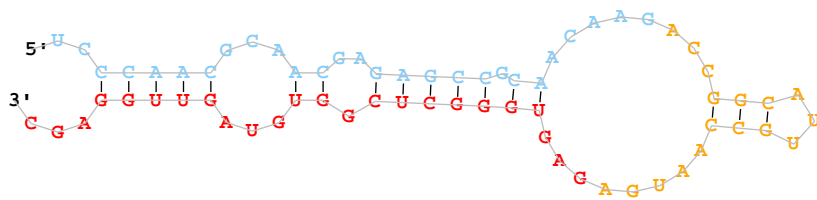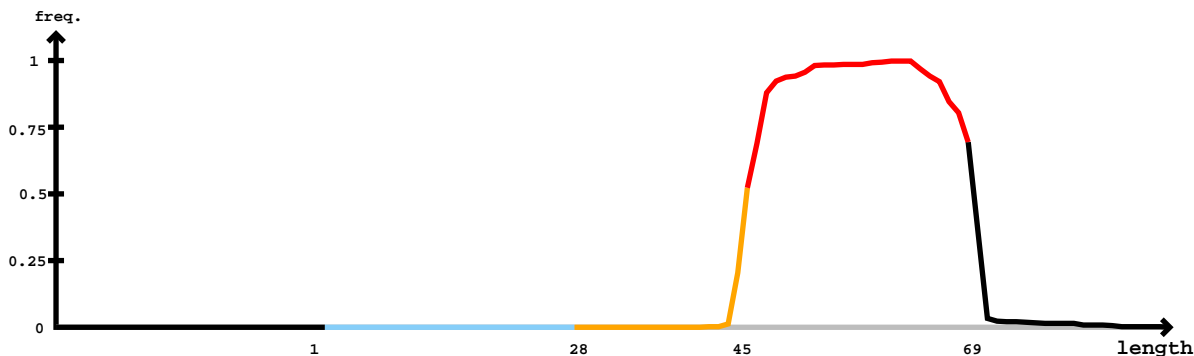

Star

Mature

| 5' | Star                        | Mature                                  | -3'                         | exp                      | reads | mm | sample |
|----|-----------------------------|-----------------------------------------|-----------------------------|--------------------------|-------|----|--------|
| 5' | ccguucuuuguccaagguuccuccucc | uccccaacgcaacgagagccgcaacaagaccggcauugc | caaugagagugggcucgguguguaguu | ggagcuggucggacauucuggaag |       |    |        |
|    | .....                       | .....                                   | .....                       | .....                    | 1     | 1  | S03    |
|    | .....                       | .....                                   | .....                       | .....                    | 1     | 1  | S03    |
|    | .....                       | .....                                   | .....                       | .....                    | 1     | 1  | S03    |
|    | .....                       | .....                                   | .....                       | .....                    | 5     | 0  | S03    |
|    | .....                       | .....                                   | .....                       | .....                    | 1     | 1  | S03    |
|    | .....                       | .....                                   | .....                       | .....                    | 1     | 1  | S03    |
|    | .....                       | .....                                   | .....                       | .....                    | 4     | 0  | S03    |
|    | .....                       | .....                                   | .....                       | .....                    | 2     | 1  | S03    |
|    | .....                       | .....                                   | .....                       | .....                    | 2     | 0  | S03    |
|    | .....                       | .....                                   | .....                       | .....                    | 1     | 1  | S03    |
|    | .....                       | .....                                   | .....                       | .....                    | 1     | 1  | S03    |
|    | .....                       | .....                                   | .....                       | .....                    | 1     | 1  | S03    |
|    | .....                       | .....                                   | .....                       | .....                    | 5     | 0  | S03    |
|    | .....                       | .....                                   | .....                       | .....                    | 1     | 1  | S03    |
|    | .....                       | .....                                   | .....                       | .....                    | 1     | 1  | S03    |
|    | .....                       | .....                                   | .....                       | .....                    | 7     | 0  | S03    |
|    | .....                       | .....                                   | .....                       | .....                    | 1     | 1  | S03    |
|    | .....                       | .....                                   | .....                       | .....                    | 14    | 0  | S03    |
|    | .....                       | .....                                   | .....                       | .....                    | 2     | 1  | S03    |
|    | .....                       | .....                                   | .....                       | .....                    | 4     | 0  | S03    |
|    | .....                       | .....                                   | .....                       | .....                    | 1     | 1  | S03    |
|    | .....                       | .....                                   | .....                       | .....                    | 2     | 0  | S03    |
|    | .....                       | .....                                   | .....                       | .....                    | 1     | 1  | S03    |
|    | .....                       | .....                                   | .....                       | .....                    | 3     | 0  | S03    |
|    | .....                       | .....                                   | .....                       | .....                    | 2     | 0  | S03    |
|    | .....                       | .....                                   | .....                       | .....                    | 1     | 1  | S03    |
|    | .....                       | .....                                   | .....                       | .....                    | 2     | 0  | S03    |
|    | .....                       | .....                                   | .....                       | .....                    | 1     | 1  | S03    |
|    | .....                       | .....                                   | .....                       | .....                    | 2     | 0  | S03    |
|    | .....                       | .....                                   | .....                       | .....                    | 1     | 1  | S03    |
|    | .....                       | .....                                   | .....                       | .....                    | 5     | 1  | S03    |
|    | .....                       | .....                                   | .....                       | .....                    | 16    | 1  | S03    |
|    | .....                       | .....                                   | .....                       | .....                    | 8     | 1  | S03    |
|    | .....                       | .....                                   | .....                       | .....                    | 44    | 0  | S03    |
|    | .....                       | .....                                   | .....                       | .....                    | 1     | 0  | S03    |
|    | .....                       | .....                                   | .....                       | .....                    | 1     | 0  | S03    |

Star

Mature

ccguucuuuccaagguuccuccuccuuccccaacgcaacgagagccgcaacaagaccggcauugccaauagagagugggucgguaguuggagcuggucggacaucuuggaag

|                                  |    |   |     |
|----------------------------------|----|---|-----|
| .....agugggucgguaguuggA.....     | 1  | 1 | S03 |
| .....agugggucgguaguugg.....      | 3  | 0 | S03 |
| .....agugggucgguaguugga.....     | 1  | 0 | S03 |
| .....agugggucgguaguuggaA.....    | 1  | 1 | S03 |
| .....agugggucgguaguuggag.....    | 8  | 0 | S03 |
| .....agugggucgguaguuggagA.....   | 1  | 1 | S03 |
| .....agugggucgguaguuggagC.....   | 1  | 1 | S03 |
| .....agugggucgguaguuggagU.....   | 3  | 1 | S03 |
| .....agugggucgguaguuggagC.....   | 2  | 0 | S03 |
| .....agugggucgguaguuggagcu.....  | 22 | 0 | S03 |
| .....agugggucgguaguuggagcC.....  | 2  | 1 | S03 |
| .....Ggugggucgguaguuggagcu.....  | 1  | 1 | S03 |
| .....agugggucgguaguuggagcG.....  | 2  | 1 | S03 |
| .....gugggucgguaguuuU.....       | 1  | 1 | S03 |
| .....gugggucgguaguugg.....       | 3  | 0 | S03 |
| .....gugggucgguaguugga.....      | 2  | 0 | S03 |
| .....gugggucgguaguuggaA.....     | 2  | 1 | S03 |
| .....gugggucgguaguuggaC.....     | 1  | 1 | S03 |
| .....gugggucgguaguuggagA.....    | 4  | 1 | S03 |
| .....gugggucgguaguuggagG.....    | 1  | 1 | S03 |
| .....gugggucgguaguuggagU.....    | 6  | 1 | S03 |
| .....gGgggucgguaguuggagc.....    | 1  | 1 | S03 |
| .....gugggucgguaguuggagc.....    | 21 | 0 | S03 |
| .....gugggucgguaguuggagcA.....   | 1  | 1 | S03 |
| .....gugggucgguaguuggagcu.....   | 8  | 0 | S03 |
| .....gugggucgguaguuggagcC.....   | 2  | 1 | S03 |
| .....gCgggucgguaguuggagcu.....   | 1  | 1 | S03 |
| .....gugggucgguaguugggGcu.....   | 1  | 1 | S03 |
| .....gugggucgguaguuggagcC.....   | 1  | 1 | S03 |
| .....ugggucgguaguugga.....       | 2  | 0 | S03 |
| .....ugggucgguaguuggag.....      | 1  | 0 | S03 |
| .....ugggucgguaguuggagU.....     | 1  | 1 | S03 |
| .....ugggucgguaguuggagA.....     | 1  | 1 | S03 |
| .....ugggucgguaguuggagc.....     | 2  | 0 | S03 |
| .....ugggucgguaguuggaAc.....     | 1  | 1 | S03 |
| .....ugggucgguaguuggagcA.....    | 1  | 1 | S03 |
| .....ugggucgguaguuggagcu.....    | 2  | 0 | S03 |
| .....ugggucgguaguuggagcA.....    | 1  | 1 | S03 |
| .....gggucgguaguuggag.....       | 1  | 0 | S03 |
| .....gggucgguaguuggagc.....      | 3  | 0 | S03 |
| .....gggucgguaguuggagcu.....     | 1  | 0 | S03 |
| .....ggcucgguaguuggagc.....      | 1  | 0 | S03 |
| .....ggcucgguaguuggagA.....      | 1  | 1 | S03 |
| .....gcucgguaguuggagcu.....      | 2  | 0 | S03 |
| .....gcucgguaguuggagcA.....      | 1  | 1 | S03 |
| .....gcucgguaguuggagcuCg.....    | 1  | 1 | S03 |
| .....cucgguaguuggagcA.....       | 1  | 1 | S03 |
| .....cucgguaguuggagcG.....       | 1  | 1 | S03 |
| .....cucgguaguuggagcu.....       | 1  | 0 | S03 |
| .....cucgguaguuggagcC.....       | 1  | 1 | S03 |
| .....cucgAguaguuggagcug.....     | 1  | 1 | S03 |
| .....cucgguaguuggagcuCgucg.....  | 1  | 1 | S03 |
| .....ucgguaguuggagcuA.....       | 1  | 1 | S03 |
| .....ggguaguuggagcuAgucc.....    | 1  | 1 | S03 |
| .....aguuggagcuCgucggacauuu..... | 2  | 1 | S03 |
| .....gagagugggucgguagu.....      | 1  | 1 | S04 |
| .....gagagugggucgguagu.....      | 1  | 1 | S04 |
| .....gagUgugggucgguagu.....      | 1  | 1 | S04 |
| .....gagagugggucgguaguug.....    | 1  | 1 | S04 |
| .....agagugggucgguaguU.....      | 1  | 1 | S04 |
| .....agagugggucgguagu.....       | 2  | 0 | S04 |
| .....agagugggucgguaguug.....     | 2  | 0 | S04 |
| .....agagugggucgguaguugg.....    | 5  | 0 | S04 |
| .....agagugggucgguaguugA.....    | 1  | 1 | S04 |
| .....Ggagugggucgguaguugg.....    | 1  | 1 | S04 |
| .....agagugUgucgguaguugg.....    | 1  | 1 | S04 |
| .....agagugggucgguaguugg.....    | 1  | 1 | S04 |
| .....agagugggucgguaguugga.....   | 2  | 0 | S04 |
| .....agagugggucgguaguuggaA.....  | 3  | 1 | S04 |

Star

Mature

ccguucucuguccaagguuccuccuccucccccaacgcaacgagagccgcaacaagaccggcauugccaauagagagugggucgggugaguuggagcugguccggacaucuuggaag

|                                     |    |   |     |
|-------------------------------------|----|---|-----|
| .....agagugggucgggucaguuuggag.....  | 1  | 1 | S04 |
| .....agagugggucgggugaguuggag.....   | 8  | 0 | S04 |
| .....agagugggucgggugaguuggag.....   | 1  | 1 | S04 |
| .....agagugggucgggugaguuggagU.....  | 5  | 1 | S04 |
| .....agagugggucgggugaguuggagc.....  | 2  | 0 | S04 |
| .....agagugggucgggugaguuggaUcu..... | 1  | 1 | S04 |
| .....gagugggucgggugagu.....         | 1  | 0 | S04 |
| .....gagugggucgggugagu.....         | 1  | 0 | S04 |
| .....gagugggucgggugaguugg.....      | 5  | 0 | S04 |
| .....gUgugggucgggugaguugg.....      | 1  | 1 | S04 |
| .....gagugggucgggugaguuggag.....    | 2  | 0 | S04 |
| .....gUgugggucgggugaguuggag.....    | 1  | 1 | S04 |
| .....gagugggGucgggugaguuggag.....   | 1  | 1 | S04 |
| .....gagugggucgggugaguuggagc.....   | 1  | 1 | S04 |
| .....gagugggucgggugaguuggagc.....   | 31 | 0 | S04 |
| .....gagugggucggCugaguuggagc.....   | 1  | 1 | S04 |
| .....Uagugggucgggugaguuggagc.....   | 1  | 1 | S04 |
| .....gagAggggucgggugaguuggagc.....  | 1  | 1 | S04 |
| .....gagugggucgggugaguuggagU.....   | 9  | 1 | S04 |
| .....gUgugggucgggugaguuggagc.....   | 4  | 1 | S04 |
| .....gagugggucgggugaguuggagA.....   | 3  | 1 | S04 |
| .....Aagugggucgggugaguuggagc.....   | 1  | 1 | S04 |
| .....gagugggucgggugaguuggagcu.....  | 2  | 0 | S04 |
| .....gUgugggucgggugaguuggagcu.....  | 2  | 1 | S04 |
| .....agugggucgggugaguugg.....       | 1  | 0 | S04 |
| .....agugggucgggugaguugg.....       | 1  | 0 | S04 |
| .....agugggucgggugaguugga.....      | 2  | 0 | S04 |
| .....agugggucgggugaguuggag.....     | 2  | 0 | S04 |
| .....agugggucgggugaguuggagA.....    | 2  | 1 | S04 |
| .....agugggucgggugaguuggagc.....    | 3  | 0 | S04 |
| .....agugggucgggugaguuggagU.....    | 1  | 1 | S04 |
| .....agugggucggGguaguuggagc.....    | 1  | 1 | S04 |
| .....agugggucgggugaguuggagcu.....   | 10 | 0 | S04 |
| .....agugggucgggugaguuggagcu.....   | 1  | 1 | S04 |
| .....agugggucgggugaguuggagcC.....   | 1  | 1 | S04 |
| .....Ugugggucgggugaguuggagcu.....   | 1  | 1 | S04 |
| .....agugggucgggugaguuggagcA.....   | 1  | 1 | S04 |
| .....agugggucgggugAguuuggagcu.....  | 1  | 1 | S04 |
| .....agugggucgggugaguuggagcG.....   | 2  | 1 | S04 |
| .....gugggucgggugaguugg.....        | 1  | 0 | S04 |
| .....gugggucgggugaguuggU.....       | 1  | 1 | S04 |
| .....gugggucgggugaguugga.....       | 2  | 0 | S04 |
| .....gugggucgggugaguuggag.....      | 1  | 0 | S04 |
| .....gugggucgggugaguuggagc.....     | 11 | 0 | S04 |
| .....gGgggucgggugaguuggagc.....     | 1  | 1 | S04 |
| .....gugggucgggugaguuggagU.....     | 6  | 1 | S04 |
| .....gugggucgggugaguuggagcA.....    | 1  | 1 | S04 |
| .....gugggAcucgggugaguuggagcu.....  | 1  | 1 | S04 |
| .....gugggucgggugaguuggagcu.....    | 8  | 0 | S04 |
| .....gugggucgggugaguuggagcG.....    | 1  | 1 | S04 |
| .....gugggucgggugaguuggagcug.....   | 1  | 0 | S04 |
| .....ugggucgggugaguuggagc.....      | 4  | 0 | S04 |
| .....ugggcCogggugaguuggagc.....     | 1  | 1 | S04 |
| .....ugggucgggugaguuggagUu.....     | 1  | 1 | S04 |
| .....Ngggucgggugaguuggagcu.....     | 1  | 1 | S04 |
| .....ugggucgggugaguuggagcu.....     | 2  | 0 | S04 |
| .....gggucgggugaguuggagc.....       | 1  | 0 | S04 |
| .....gggucgggugaguuggagcC.....      | 1  | 1 | S04 |
| .....gcuogggugaguuggagcu.....       | 3  | 0 | S04 |
| .....cucgggugaguuggagcu.....        | 4  | 0 | S04 |
| .....cucggguAguuuggagcu.....        | 1  | 1 | S04 |
| .....cucgggugaguuggagcugguc.....    | 1  | 0 | S04 |
| .....guaguuggagcuCgucgggaca.....    | 3  | 1 | S04 |
| .....uaguuggagcuCgucgggacauc.....   | 1  | 1 | S04 |
| .....gcuUgucgggacaucuuggaag.....    | 1  | 1 | S04 |







Provisional ID : chrA10\_925211  
 Score total : 11.7  
 Score for star read(s) : 3.9  
 Score for read counts : 5.7  
 Score for mfe : 2.1  
 Score for randfold : 0  
 Score for cons. seed :  
 Total read count : 23  
 Mature read count : 16  
 Loop read count : 1  
 Star read count : 6

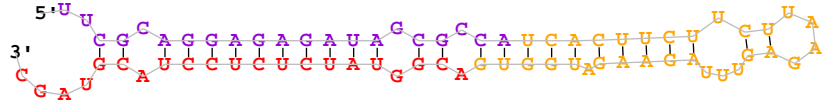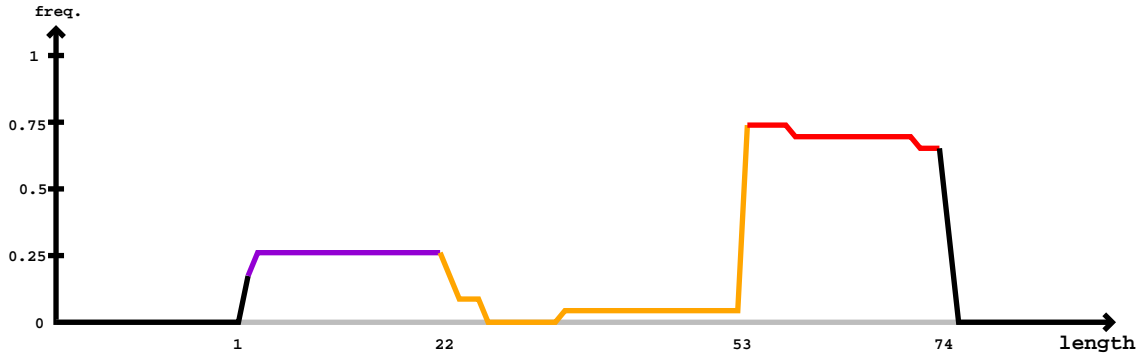

**Star**

**Mature**

| 5' -                                                                                              | 3'                | obs | exp | reads | mm | sample |
|---------------------------------------------------------------------------------------------------|-------------------|-----|-----|-------|----|--------|
| cugcaaaaagguucgc <u>uucgcaggagagauagcgcca</u> ucacuucucuuuagaguuuagaagauggugacgguaucucuccuacguagc | aaucuuuuuuauugcau |     |     |       |    |        |
| cugcaaaaagguucgc <u>uucgcaggagagauagcgcca</u> ucacuucucuuuagaguuuagaagauggugacgguaucucuccuacguagc | aaucuuuuuuauugcau |     |     |       |    |        |
| .....uucgcaggagagauagcgcca.....                                                                   |                   | 1   | 0   | 1     | 0  | S03    |
| .....uucgcaggagagauagcgcca.....                                                                   |                   | 1   | 0   | 1     | 0  | S03    |
| .....acgguaucucuccuacgu.....                                                                      |                   | 1   | 0   | 1     | 0  | S03    |
| .....Gcgguaucucuccuacguagc.....                                                                   |                   | 1   | 1   | 1     | 1  | S03    |
| .....acgguaucucuccuacguagU.....                                                                   |                   | 1   | 1   | 1     | 1  | S03    |
| .....acgguaucucuccuacguagc.....                                                                   |                   | 5   | 0   | 5     | 0  | S03    |
| .....uucgcaggagagauagcgccG.....                                                                   |                   | 1   | 1   | 1     | 1  | S04    |
| .....uucgcaggagagauagcgccU.....                                                                   |                   | 1   | 1   | 1     | 1  | S04    |
| .....uucgcaggagagauagcgcca.....                                                                   |                   | 1   | 0   | 1     | 0  | S04    |
| .....uucgcaggagagauagcgcca.....                                                                   |                   | 1   | 1   | 1     | 1  | S04    |
| .....aaaguuuuagaagauggugacggA.....                                                                |                   | 1   | 1   | 1     | 1  | S04    |
| .....acgguaucucuccuacguagA.....                                                                   |                   | 1   | 1   | 1     | 1  | S04    |
| .....acgguaucucuccuacguagU.....                                                                   |                   | 1   | 1   | 1     | 1  | S04    |
| .....acgguaucucuccuacguagc.....                                                                   |                   | 6   | 0   | 6     | 0  | S04    |

Provisional ID : chrA10\_943534  
 Score total : 0.3  
 Score for star read(s) : -1.3  
 Score for read counts : 0  
 Score for mfe : 1.6  
 Score for randfold : 0  
 Score for cons. seed :  
 Total read count : 16  
 Mature read count : 16  
 Loop read count : 0  
 Star read count : 0

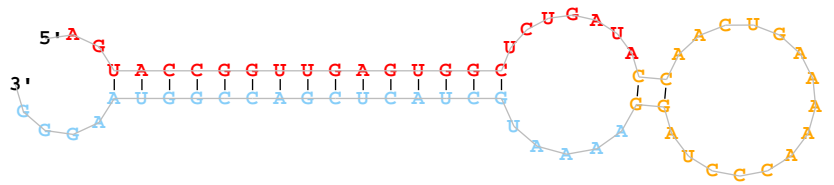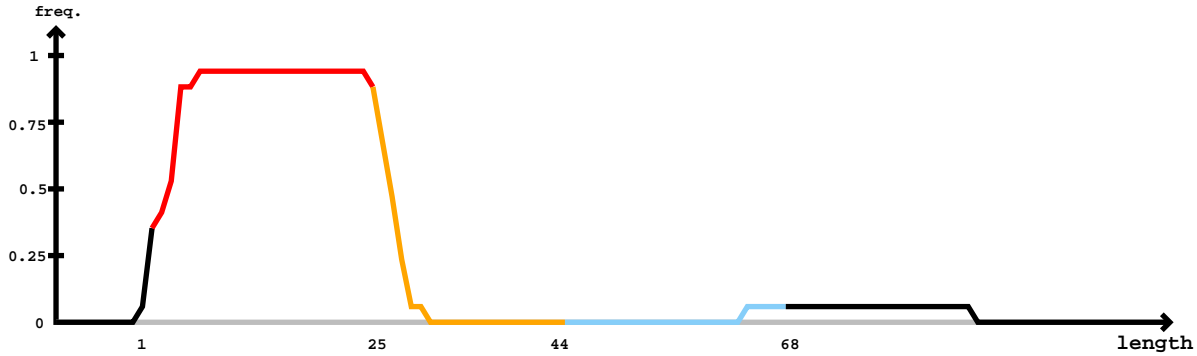

**Mature**

**Star**

| 5' -                                                                                                         | reads | mm | sample |
|--------------------------------------------------------------------------------------------------------------|-------|----|--------|
| aacagacaaguacccgguugaguggcucugauaccaacugaaaaaccuaggaaaugcuacucgaccgguaggauuggacucagauccgguaggauugagaacuggugg | 3     | 0  | S03    |
| .....aguacccgguugaguggcucugaua.....                                                                          | 2     | 0  | S03    |
| .....accgguugaguggcucugauacc.....                                                                            | 1     | 0  | S03    |
| .....accgguugaguggcucugauacca.....                                                                           | 1     | 0  | S03    |
| .....aagggggauuggacucagauccg.....                                                                            | 1     | 0  | S03    |
| .....aaguaccgguugaguggcucugau.....                                                                           | 1     | 0  | S04    |
| .....aguacccgguugaguggcucugau.....                                                                           | 2     | 0  | S04    |
| .....guaccgguugaguggcucugauaccU.....                                                                         | 1     | 1  | S04    |
| .....uaccgguugaguggcucugauacA.....                                                                           | 1     | 1  | S04    |
| .....uaccgguugaguggcucugauaccU.....                                                                          | 1     | 1  | S04    |
| .....accgguugaguggcCugaua.....                                                                               | 1     | 1  | S04    |
| .....accgguugaguggcucugauac.....                                                                             | 1     | 0  | S04    |
| .....accgguugaguggcucugauacA.....                                                                            | 1     | 1  | S04    |
| .....cggguugaguggcucugauaccaaG.....                                                                          | 1     | 1  | S04    |







Provisional ID : chrA10\_961933  
 Score total : 0.1  
 Score for star read(s) : -1.3  
 Score for read counts : 0  
 Score for mfe : 1.4  
 Score for randfold : 0  
 Score for cons. seed :  
 Total read count : 798  
 Mature read count : 798  
 Loop read count : 0  
 Star read count : 0

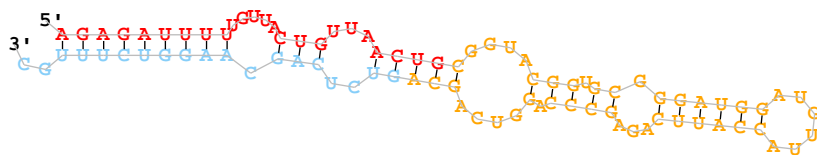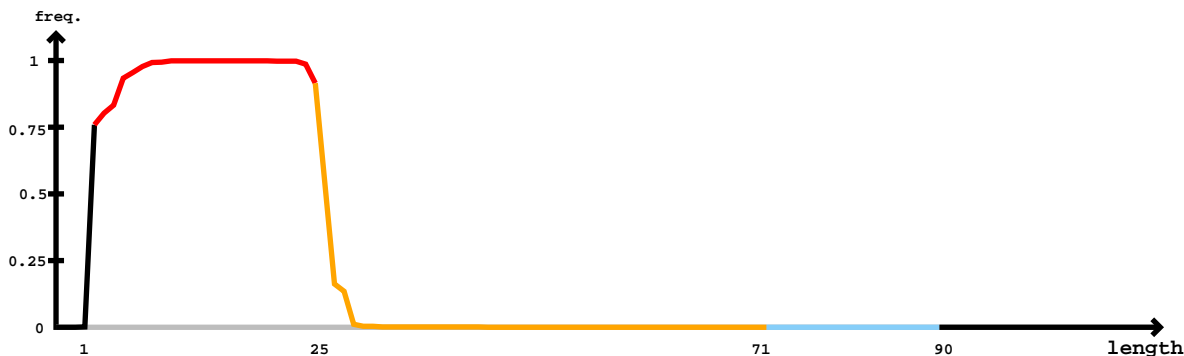

**Mature**

**Star**

| 5' -                                                                                                              | Star | 3' | exp | reads | mm | sample |
|-------------------------------------------------------------------------------------------------------------------|------|----|-----|-------|----|--------|
| gcagagauuuuuuguuacuguuacugcgguacggugcggauggaugguuaccuuacagagcccaggucagcagucucagcaaggucuuugcuuuccaaggcauugccaauuuu |      |    |     |       |    |        |
| .....(((.....(((.....(((.....(((.....)))))).....)))))).....(((.....))).....                                       |      |    |     |       |    |        |
| .Gagagauuuuuuguuacuguuacu.....                                                                                    |      |    |     | 1     | 1  | S03    |
| ..agagauuuuuuguuacugu.....                                                                                        |      |    |     | 1     | 0  | S03    |
| ..agagauuuuuuguuacuguuac.....                                                                                     |      |    |     | 5     | 0  | S03    |
| ..agagauuuuuuguuacuguuacu.....                                                                                    |      |    |     | 21    | 0  | S03    |
| ..agagauuuuuuguuacuguuacug.....                                                                                   |      |    |     | 173   | 0  | S03    |
| ..agagauuuuuuguuacuguuacug.....                                                                                   |      |    |     | 1     | 1  | S03    |
| ..Ggagauuuuuuguuacuguuacug.....                                                                                   |      |    |     | 2     | 1  | S03    |
| ..agagauuuuuuguuacuguuacug.....                                                                                   |      |    |     | 1     | 1  | S03    |
| ..agagauuuuuuguuacuguuacu.....                                                                                    |      |    |     | 1     | 1  | S03    |
| ..agagauuuuuuguuacuguuacu.....                                                                                    |      |    |     | 1     | 1  | S03    |
| ..agagauuuuuuguuacuguuacu.....                                                                                    |      |    |     | 1     | 1  | S03    |
| ..agagauuuuuuguuacuguuacu.....                                                                                    |      |    |     | 1     | 1  | S03    |
| ..agagauuuuuuguuacuguuacu.....                                                                                    |      |    |     | 5     | 1  | S03    |
| ..agagauuuuuuguuacuguuacu.....                                                                                    |      |    |     | 1     | 1  | S03    |
| ..agagauuuuuuguuacuguuacu.....                                                                                    |      |    |     | 1     | 0  | S03    |
| ..gagauuuuuuguuacuguuacu.....                                                                                     |      |    |     | 5     | 0  | S03    |
| ..gagauuuuuuguuacuguuacu.....                                                                                     |      |    |     | 2     | 0  | S03    |
| ..gagauuuuuuguuacuguuacu.....                                                                                     |      |    |     | 6     | 0  | S03    |
| ..agauuuuuuguuacuguuacu.....                                                                                      |      |    |     | 1     | 1  | S03    |
| ..agauuuuuuguuacuguuacu.....                                                                                      |      |    |     | 1     | 1  | S03    |
| ..agauuuuuuguuacuguuacu.....                                                                                      |      |    |     | 1     | 0  | S03    |
| ..agauuuuuuguuacuguuacugcg.....                                                                                   |      |    |     | 6     | 0  | S03    |
| ..gauuuuuuguuacuguuacu.....                                                                                       |      |    |     | 2     | 0  | S03    |
| ..gauuuuuuguuacuguuacu.....                                                                                       |      |    |     | 1     | 0  | S03    |
| ..gauuuuuuguuacuguuacu.....                                                                                       |      |    |     | 15    | 0  | S03    |
| ..uuuuuuuguuacuguuacu.....                                                                                        |      |    |     | 1     | 0  | S03    |
| ..uuuuuuuguuacuguuacu.....                                                                                        |      |    |     | 1     | 0  | S03    |
| ..uuuuuuuguuacuguuacu.....                                                                                        |      |    |     | 1     | 0  | S03    |
| ..uuuuuuuguuacuguuacu.....                                                                                        |      |    |     | 1     | 0  | S03    |
| ..uuuuuuuguuacuguuacu.....                                                                                        |      |    |     | 2     | 0  | S03    |
| ..uuuuuuuguuacuguuacu.....                                                                                        |      |    |     | 1     | 1  | S03    |
| ..uuuuuuuguuacuguuacu.....                                                                                        |      |    |     | 1     | 0  | S03    |
| ..uuuuuuuguuacuguuacu.....                                                                                        |      |    |     | 1     | 0  | S03    |
| ..uuuuuuuguuacuguuacu.....                                                                                        |      |    |     | 1     | 0  | S03    |
| ..uuuuuuuguuacuguuacu.....                                                                                        |      |    |     | 1     | 1  | S03    |
| ..uuuuuuuguuacuguuacu.....                                                                                        |      |    |     | 2     | 0  | S03    |
| ..uuuuuuuguuacuguuacu.....                                                                                        |      |    |     | 1     | 0  | S03    |

Mature

Star

|                                                                                                                    |     |   |     |
|--------------------------------------------------------------------------------------------------------------------|-----|---|-----|
| gcagagauuuuuuguaacuguaacugcgguacggugcgggauggauguuaccuuacagagcccaggucagcagucucagcaaggucuuugcuuuuccaaggcauugccaauuuu |     |   |     |
| .....uuuguaacuguaacugcgg.....                                                                                      | 1   | 0 | S03 |
| .....uaacugcgguacggugcgggaug.....                                                                                  | 1   | 0 | S03 |
| ..agagauuuuuuguaacuguu.....                                                                                        | 1   | 0 | S04 |
| ..Ggagauuuuuuguaacuguaaac.....                                                                                     | 1   | 1 | S04 |
| ..agagauuuuuuguaacuguaaac.....                                                                                     | 3   | 0 | S04 |
| ..agagauuuuuuguaacuguaaacu.....                                                                                    | 21  | 0 | S04 |
| ..Cgagauuuuuuguaacuguaaacug.....                                                                                   | 1   | 1 | S04 |
| ..Ggagauuuuuuguaacuguaaacug.....                                                                                   | 8   | 1 | S04 |
| ..agagauuuuuuguaacuguaaacug.....                                                                                   | 341 | 0 | S04 |
| ..agagauuuuuCguuacuguaaacug.....                                                                                   | 2   | 1 | S04 |
| ..Ngagauuuuuuguaacuguaaacug.....                                                                                   | 2   | 1 | S04 |
| ..agagauuuuuuguuNcuguaaacug.....                                                                                   | 1   | 1 | S04 |
| ..agagauuuuuuguaacuguaaacug.....                                                                                   | 1   | 1 | S04 |
| ..agagauuuuuuguaacuguaaacug.....                                                                                   | 2   | 1 | S04 |
| ..agGgauuuuuuguaacuguaaacug.....                                                                                   | 1   | 1 | S04 |
| ..agagauuuuuuguaacuguaaacug.....                                                                                   | 2   | 1 | S04 |
| ..agagauuuuuuguaacuguaaacuC.....                                                                                   | 3   | 1 | S04 |
| ..agagauuuuuuguaacuguaaacugc.....                                                                                  | 3   | 0 | S04 |
| ...gagauuuuuuguaacuguaaacu.....                                                                                    | 7   | 0 | S04 |
| ...gagauuuuuuguaacuguaaacug.....                                                                                   | 4   | 0 | S04 |
| ...gagauuuuuuguaacuguaaacugc.....                                                                                  | 11  | 0 | S04 |
| ...agauuuuuuguaacuguaaacu.....                                                                                     | 1   | 0 | S04 |
| ...agauuuuuuguaacuguaaacug.....                                                                                    | 2   | 0 | S04 |
| ...agauuuuuuguaacuguaaacugc.....                                                                                   | 2   | 0 | S04 |
| ...agauuuuuuguaacuguaaacugcg.....                                                                                  | 10  | 0 | S04 |
| ...gauuuuuuguaacuguaaacug.....                                                                                     | 6   | 0 | S04 |
| ...gauuuuuuguaacuguaaacugc.....                                                                                    | 2   | 0 | S04 |
| ...gauuuuuuguaacuguaaacugcgg.....                                                                                  | 51  | 0 | S04 |
| ...gauuuuuuguaacuguaaacugcgC.....                                                                                  | 1   | 1 | S04 |
| ...gauuuuuuguaacuguaaacugcgg.....                                                                                  | 1   | 1 | S04 |
| ...gauuuuuuguaacuguaaacugcgg.....                                                                                  | 2   | 1 | S04 |
| ...auuuuuuguaacuguaaacug.....                                                                                      | 2   | 0 | S04 |
| ...auuuuuuguaacuguaaacugc.....                                                                                     | 1   | 0 | S04 |
| ...auuuuuuguaacuguaaacugcgg.....                                                                                   | 2   | 0 | S04 |
| ...auuuuuuguaacuguaaacugcgg.....                                                                                   | 6   | 0 | S04 |
| ...auuuuuuguaacuguaaacugcgggu.....                                                                                 | 3   | 0 | S04 |
| ...uuuuuuuguaacuguaaacu.....                                                                                       | 1   | 0 | S04 |
| ...uuuuuuuguaacuguaaacugc.....                                                                                     | 3   | 0 | S04 |
| ...uuuuuuuguaacuguaaacugcgg.....                                                                                   | 2   | 0 | S04 |
| ...uuuuuuuguaacuguaaacugcgg.....                                                                                   | 7   | 0 | S04 |
| ...uuuuuuuguaacuguaaacugcgg.....                                                                                   | 5   | 0 | S04 |
| ...uuuuuuuguaacuguaaacugcgggu.....                                                                                 | 1   | 0 | S04 |
| ...uuuuuuuaLuuuuaaacugcgguaac.....                                                                                 | 1   | 1 | S04 |
| ...uuuuuuuguaacuguaaacugcgUaac.....                                                                                | 1   | 1 | S04 |
| ...uuuuuuuguaacuguaaacugcgC.....                                                                                   | 1   | 1 | S04 |
| ...uuuuuuuguaacuguaaacugcgg.....                                                                                   | 3   | 0 | S04 |









Provisional ID : chrAnn\_random\_2969865  
 Score total : 3.8  
 Score for star read(s) : 3.9  
 Score for read counts : 1.1  
 Score for mfe : -1.1  
 Score for randfold : 0  
 Score for cons. seed :  
 Total read count : 14  
 Mature read count : 4  
 Loop read count : 9  
 Star read count : 1

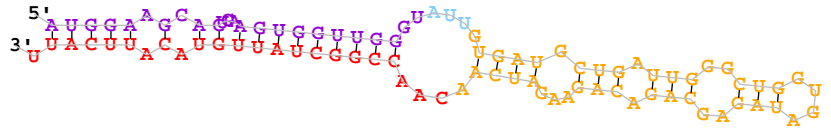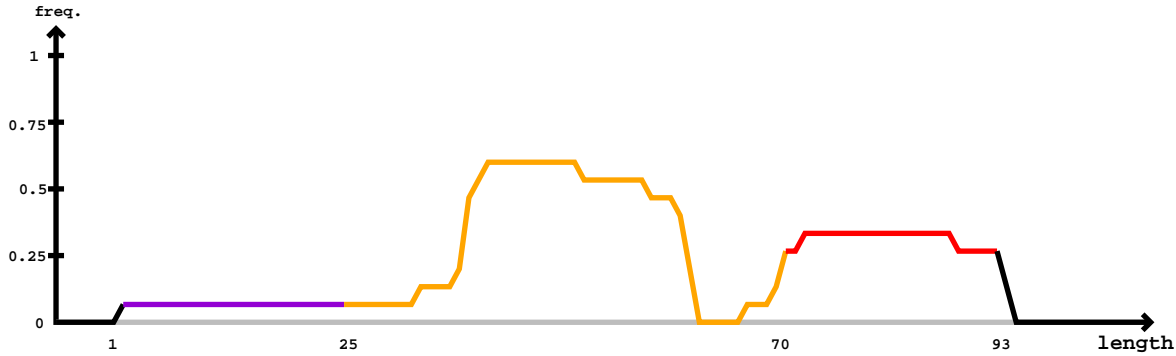

**Star**

**Mature**

| 5' -                                                                                                               | reads | mm | sample |
|--------------------------------------------------------------------------------------------------------------------|-------|----|--------|
| uuguaauggaagcacugaagugguuggguuuugugaugcugauugggcugggugauagagcagacagaagaaucaacaaccggcuauuguacauucauuggaggcaacuugguu | 1     | 1  | S03    |
| uuguaauggaagcacugaagugguuggguuuugugaugcugauugggcugggugauagagcagacagaagaaucaacaaccggcuauuguacauucauuggaggcaacuugguu | 1     | 1  | S03    |
| .....uugugaugcugauugggcugguA.....                                                                                  | 1     | 1  | S03    |
| .....ugcAgauugggcugggugauagagc.....                                                                                | 1     | 1  | S03    |
| .....auugggcugggugauagaAcagac.....                                                                                 | 1     | 1  | S03    |
| .....auugggcugggugauagagcagacG.....                                                                                | 1     | 1  | S03    |
| .....auugggcugggugauagagcagaca.....                                                                                | 1     | 0  | S03    |
| .....uugggcugggugauagagcUga.....                                                                                   | 1     | 1  | S03    |
| .....acaaccggcuauugCacauucauu.....                                                                                 | 1     | 1  | S03    |
| .....caaccggcuauugCacauucauu.....                                                                                  | 2     | 1  | S03    |
| .....auggaagcacugaagugguugAgu.....                                                                                 | 1     | 1  | S04    |
| .....gauugggcugggugauagagUagac.....                                                                                | 1     | 1  | S04    |
| .....auugggcugggugauagagcagaca.....                                                                                | 1     | 0  | S04    |
| .....ugggcugggugauagagcagac.....                                                                                   | 1     | 0  | S04    |
| .....ucaacaaccggcuauuguacau.....                                                                                   | 1     | 0  | S04    |
| .....accggcuauuguacauucauG.....                                                                                    | 1     | 1  | S04    |



**Mature**

**Star**

|                     |                          |                            |                   |        |                   |   |   |     |
|---------------------|--------------------------|----------------------------|-------------------|--------|-------------------|---|---|-----|
| ucgcuccuuuguguuccug | guagguagacgcacuguuucuca  | cauuguuuaaaacuguuguaacaug  | agagacauuuguuucua | cuuaag | gggagcagauucagauc |   |   |     |
| .....               | .guagguagacgcacuguuucCa  | .....                      |                   |        |                   | 1 | 1 | S04 |
| .....               | .gGagguagacgcacuguuucua  | .....                      |                   |        |                   | 2 | 1 | S04 |
| .....               | .guagguagacgcacuguuCcuca | .....                      |                   |        |                   | 2 | 1 | S04 |
| .....               |                          | .cauuguuuaaaacuguuguaacaug | .....             |        |                   | 2 | 0 | S04 |
| .....               |                          | .uuguuuaaaacuguuguaacaug   | .....             |        |                   | 1 | 0 | S04 |









Provisional ID : chrAnn\_random\_3000316  
 Score total : 0  
 Score for star read(s) : -1.3  
 Score for read counts : 0  
 Score for mfe : 1.3  
 Score for randfold : 0  
 Score for cons. seed :  
 Total read count : 304  
 Mature read count : 301  
 Loop read count : 0  
 Star read count : 3

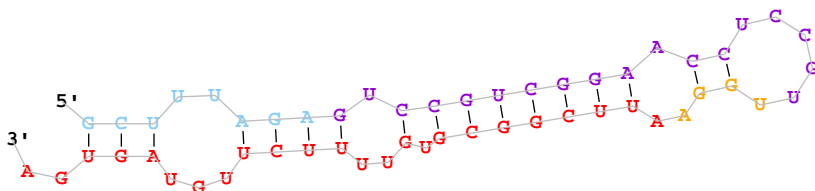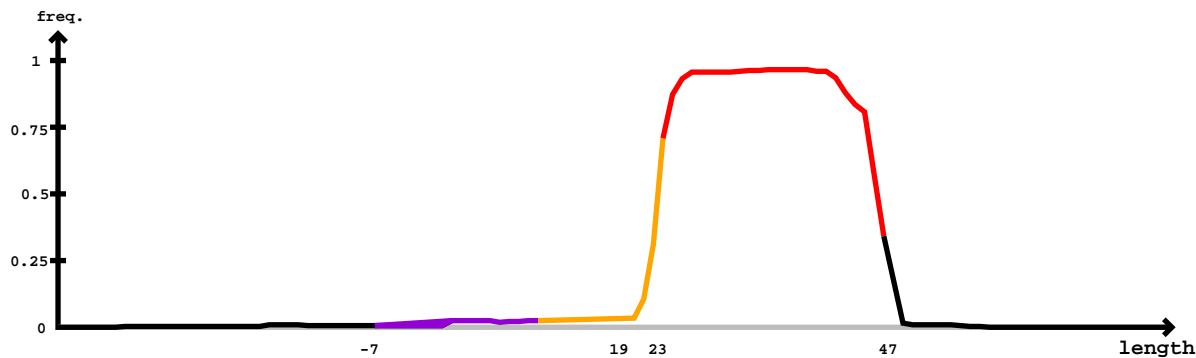

Star
Mature

| 5' -                                                                                                                                                                             | -3' | obs | mm | sample |
|----------------------------------------------------------------------------------------------------------------------------------------------------------------------------------|-----|-----|----|--------|
| uucgucagaaaaucgucacaaaacgucggauggcuuagaguccgucggaaccuccgguuggaauucggcguguuuucuuagugauugguuuguggaagguuugcgacuugaga                                                                | exp |     |    |        |
| uucgucagaaaaucgucacaaaacgucggaugcuuuagaguccgucggaaccuccgguuggaauucggcguguuuucuuagugauugguuuguggaagguuugcgacuugaga                                                                |     | 1   | 1  | S03    |
| ...(((....(((.....(((.....(((.....(((.....(((.....(((.....(((.....(((.....(((.....(((.....(((.....(((.....(((.....(((.....(((.....(((.....)))))))))))))))))))))))))))))))))).... |     | 1   | 1  | S03    |
| ....cagaaaucgucacaaaacA.....                                                                                                                                                     |     | 1   | 1  | S03    |
| .....gucgucggaaccuccgguC.....                                                                                                                                                    |     | 1   | 1  | S03    |
| .....cggaaccuccgguuggaaauucgcU.....                                                                                                                                              |     | 1   | 1  | S03    |
| .....ggaauucggcguguuuucuuug.....                                                                                                                                                 |     | 1   | 0  | S03    |
| .....ggaauucggcguguuuucuuugua.....                                                                                                                                               |     | 1   | 0  | S03    |
| .....gaaucggcguguuuucuuug.....                                                                                                                                                   |     | 1   | 0  | S03    |
| .....gaaucggcguguuuucuuugG.....                                                                                                                                                  |     | 1   | 1  | S03    |
| .....gaaucggcguguuuucuuugua.....                                                                                                                                                 |     | 1   | 0  | S03    |
| .....gaaucggcguguuuucuuuguaG.....                                                                                                                                                |     | 2   | 1  | S03    |
| .....gaaucggcguguuuucuuugua.....                                                                                                                                                 |     | 6   | 0  | S03    |
| .....aaucggcguguuuucuuugua.....                                                                                                                                                  |     | 1   | 0  | S03    |
| .....aaucggcguguuuucuuuguaG.....                                                                                                                                                 |     | 2   | 0  | S03    |
| .....aaucggcguguuuucuuugua.....                                                                                                                                                  |     | 6   | 0  | S03    |
| .....aaucggcguguuuucuuuguaG.....                                                                                                                                                 |     | 1   | 1  | S03    |
| .....aaucggcguguuuucuuugua.....                                                                                                                                                  |     | 1   | 1  | S03    |
| .....aaucggcguguuuucuuugua.....                                                                                                                                                  |     | 1   | 1  | S03    |
| .....aaucggcguguuuucuuugua.....                                                                                                                                                  |     | 4   | 0  | S03    |
| .....aaucggcguguuuucuuugua.....                                                                                                                                                  |     | 1   | 0  | S03    |
| .....aaucggcguguuuucuuugua.....                                                                                                                                                  |     | 2   | 0  | S03    |
| .....aaucggcguguuuucuuugua.....                                                                                                                                                  |     | 1   | 1  | S03    |
| .....aaucggcguguuuucuuugua.....                                                                                                                                                  |     | 1   | 0  | S03    |
| .....aaucggcguguuuucuuugua.....                                                                                                                                                  |     | 13  | 0  | S03    |
| .....aaucggcguguuuucuuugua.....                                                                                                                                                  |     | 1   | 1  | S03    |
| .....aaucggcguguuuucuuugua.....                                                                                                                                                  |     | 1   | 1  | S03    |
| .....aaucggcguguuuucuuugua.....                                                                                                                                                  |     | 9   | 0  | S03    |
| .....aaucggcguguuuucuuugua.....                                                                                                                                                  |     | 1   | 1  | S03    |
| .....aaucggcguguuuucuuugua.....                                                                                                                                                  |     | 19  | 0  | S03    |
| .....aaucggcguguuuucuuugua.....                                                                                                                                                  |     | 2   | 0  | S03    |
| .....aaucggcguguuuucuuugua.....                                                                                                                                                  |     | 1   | 0  | S03    |
| .....aaucggcguguuuucuuugua.....                                                                                                                                                  |     | 1   | 0  | S03    |
| .....aaucggcguguuuucuuugua.....                                                                                                                                                  |     | 1   | 1  | S03    |
| .....aaucggcguguuuucuuugua.....                                                                                                                                                  |     | 2   | 1  | S03    |
| .....aaucggcguguuuucuuugua.....                                                                                                                                                  |     | 4   | 0  | S03    |
| .....aaucggcguguuuucuuugua.....                                                                                                                                                  |     | 12  | 0  | S03    |

**Star                      Mature**

|                                                                                                                      |    |   |     |
|----------------------------------------------------------------------------------------------------------------------|----|---|-----|
| uucgucagaaaucgucacaaacgucgcaaggcguuuagaguccgucggaaccuccguuggaauucggcguguuuuucuuugagugaauugguuuguggaagguuugcgacuugaga |    |   |     |
| .....ucggcguguuuuucuuugagug.....                                                                                     | 1  | 0 | S03 |
| .....ucggcguguuuuucuuugaguga.....                                                                                    | 3  | 0 | S03 |
| .....cggcguguuuuucuuugagu.....                                                                                       | 1  | 0 | S03 |
| .....cggcguguuuuucuuugaguga.....                                                                                     | 1  | 0 | S03 |
| .....guuuucuuugagugauugUuuug.....                                                                                    | 1  | 1 | S03 |
| .....aacguccgauggcuuuagaguccg.....                                                                                   | 2  | 0 | S04 |
| .....guccgucggaaccuccgA.....                                                                                         | 2  | 1 | S04 |
| .....guccgucCgaaccuccgu.....                                                                                         | 1  | 1 | S04 |
| .....guccgucggaaccuccguu.....                                                                                        | 1  | 0 | S04 |
| .....guccgucggaaccuccguuU.....                                                                                       | 1  | 1 | S04 |
| .....gGaccuccguuggaauucggcgug.....                                                                                   | 1  | 1 | S04 |
| .....ggaauucggcguguuuuucuuug.....                                                                                    | 1  | 0 | S04 |
| .....ggaauucggcguguuuuucuuugu.....                                                                                   | 1  | 0 | S04 |
| .....ggaauucggcguguuuuucuuugG.....                                                                                   | 1  | 1 | S04 |
| .....ggaauucggcguguuuuucuuugua.....                                                                                  | 2  | 0 | S04 |
| .....gaaucggcguguuuuucuuu.....                                                                                       | 2  | 0 | S04 |
| .....gaaucggcguguuuuucuuug.....                                                                                      | 1  | 0 | S04 |
| .....gaaucggcguguuuuucuuugua.....                                                                                    | 1  | 0 | S04 |
| .....gaaucggcgugGuuuuucuuugua.....                                                                                   | 1  | 1 | S04 |
| .....gaaucggcguguuuuucuuugagC.....                                                                                   | 1  | 1 | S04 |
| .....gaaucggcguguuuuucuuugua.....                                                                                    | 1  | 1 | S04 |
| .....gaaucggcguguuuuucuuugagu.....                                                                                   | 7  | 0 | S04 |
| .....aaucggcguguuuuucuuug.....                                                                                       | 1  | 0 | S04 |
| .....aaucggcguguuuuucuuugua.....                                                                                     | 5  | 0 | S04 |
| .....aaucggcguguuuuucuuugC.....                                                                                      | 1  | 1 | S04 |
| .....aaucggcguguuuuucuuuU.....                                                                                       | 1  | 1 | S04 |
| .....aaucggcguguuuuucuuugua.....                                                                                     | 2  | 0 | S04 |
| .....aaucggcguguuuuucuuugG.....                                                                                      | 1  | 1 | S04 |
| .....aaucggcguguuuuucuuugag.....                                                                                     | 2  | 0 | S04 |
| .....aUucggcguguuuuucuuugagu.....                                                                                    | 1  | 1 | S04 |
| .....aaucggcguguuuuucuuugagC.....                                                                                    | 1  | 1 | S04 |
| .....aaucggcguguuuuucuuugagu.....                                                                                    | 9  | 0 | S04 |
| .....aaucggcguguuuuucuuugagCg.....                                                                                   | 1  | 1 | S04 |
| .....aaucggcguguuuuucuuugagug.....                                                                                   | 25 | 0 | S04 |
| .....aaucggcguguuuuucuuug.....                                                                                       | 1  | 0 | S04 |
| .....aaucggcguguuuuucuuugua.....                                                                                     | 4  | 0 | S04 |
| .....aaucggcguguuuuucuuugua.....                                                                                     | 2  | 0 | S04 |
| .....aaucggcguguuuuucuuugUg.....                                                                                     | 1  | 1 | S04 |
| .....aaucggcguguuuuucuuuguaA.....                                                                                    | 1  | 1 | S04 |
| .....aaucggcguguuuuucuuugag.....                                                                                     | 2  | 0 | S04 |
| .....aaucggcguguuuuucuuugagC.....                                                                                    | 3  | 1 | S04 |
| .....aaucggcguguuuuucuuugagu.....                                                                                    | 10 | 0 | S04 |
| .....aaucggcguguuuuucuuugAgu.....                                                                                    | 1  | 1 | S04 |
| .....aaucggcguguuuuucuuugGgu.....                                                                                    | 1  | 1 | S04 |
| .....aaucggcguguuuuucuuugagug.....                                                                                   | 12 | 0 | S04 |
| .....aaucggcguguuuuucuuugaguc.....                                                                                   | 2  | 1 | S04 |
| .....aaucggcguguuuuucuuugaguU.....                                                                                   | 1  | 1 | S04 |
| .....aaucggcguguuuuucuuugaguga.....                                                                                  | 1  | 1 | S04 |
| .....aaucggcguguuuuucuuugaguga.....                                                                                  | 36 | 0 | S04 |
| .....aaucggcguguuuuucuuugagCga.....                                                                                  | 1  | 1 | S04 |
| .....Uucggcguguuuuucuuugaguga.....                                                                                   | 1  | 1 | S04 |
| .....uucggcguguuuuucuuugua.....                                                                                      | 1  | 0 | S04 |
| .....uucggcguguuuuucuuugU.....                                                                                       | 1  | 1 | S04 |
| .....uucggcguguuuuucuuugagu.....                                                                                     | 7  | 0 | S04 |
| .....uucggcguguuuuucuuugagug.....                                                                                    | 4  | 0 | S04 |
| .....uucggcguguuuuucuuugaguU.....                                                                                    | 2  | 1 | S04 |
| .....uucggcguguuuuucuuugaguga.....                                                                                   | 14 | 0 | S04 |
| .....uucggcguguuuuucuuugagugau.....                                                                                  | 1  | 0 | S04 |
| .....ucggcguguuuuucuuugagug.....                                                                                     | 3  | 0 | S04 |
| .....ucggcguguuuuucuuugaguUa.....                                                                                    | 1  | 1 | S04 |
| .....ucggcguguuuuucuuugaguga.....                                                                                    | 11 | 0 | S04 |
| .....cggcguguuuuucuuugagu.....                                                                                       | 2  | 0 | S04 |
| .....cggcguguuuuucuuugagug.....                                                                                      | 1  | 0 | S04 |
| .....cggcguguuuuucuuugaguga.....                                                                                     | 1  | 0 | S04 |
| .....cggcguguuuuucuuugagugau.....                                                                                    | 2  | 0 | S04 |
| .....uuuuuuucuuugagugauu.....                                                                                        | 2  | 0 | S04 |
| .....uuuuuuucuuugagugauAgguuu.....                                                                                   | 1  | 1 | S04 |
| .....uuuuuuucuuugagugauugguuuug.....                                                                                 | 1  | 0 | S04 |



Mature

Star

|                          |                          |            |                               |              |                         |    |   |     |
|--------------------------|--------------------------|------------|-------------------------------|--------------|-------------------------|----|---|-----|
| nnnnnnnnnnnnnnnnnnnnnnca | cagacguc                 | cugugugcua | aacggacacacacagcagccacagacguc | uuugugugcuga | cagacacacacagcaguccugug |    |   |     |
| .....                    | acggacacacacagcagccU     | .....      | .....                         | .....        | .....                   | 1  | 1 | S03 |
| .....                    | acggacacacacagcagcca     | .....      | .....                         | .....        | .....                   | 2  | 0 | S03 |
| .....                    | acggacacacacagcagccac    | .....      | .....                         | .....        | .....                   | 2  | 0 | S03 |
| .....                    | acggacacacacagcagccaca   | .....      | .....                         | .....        | .....                   | 1  | 0 | S03 |
| .....                    | cggacacacacagcagcc       | .....      | .....                         | .....        | .....                   | 1  | 0 | S03 |
| .....                    | cggacacacacagcagccac     | .....      | .....                         | .....        | .....                   | 1  | 0 | S03 |
| .....                    | cggacaAacacagcagccac     | .....      | .....                         | .....        | .....                   | 1  | 1 | S03 |
| .....                    | cggacacacGcggacagccac    | .....      | .....                         | .....        | .....                   | 1  | 1 | S03 |
| .....                    | cggacacacagcagccaca      | .....      | .....                         | .....        | .....                   | 11 | 0 | S03 |
| .....                    | acacacagcagccaca         | .....      | .....                         | .....        | .....                   | 1  | 0 | S03 |
| .....                    | acacacGcggacagccacagacgu | .....      | .....                         | .....        | .....                   | 1  | 1 | S03 |
| .....                    | acacacagcagccacagacgu    | .....      | .....                         | .....        | .....                   | 5  | 0 | S03 |
| .....                    | cacacagcagccacagGcg      | .....      | .....                         | .....        | .....                   | 1  | 1 | S03 |
| .....                    | cacUacggacagccacagacgu   | .....      | .....                         | .....        | .....                   | 1  | 1 | S03 |
| .....                    | cacacagcagccacagacG      | .....      | .....                         | .....        | .....                   | 1  | 1 | S03 |
| .....                    | cacacagcagccacagacgu     | .....      | .....                         | .....        | .....                   | 1  | 0 | S03 |
| .....                    | Aacacagcagccacagacgu     | .....      | .....                         | .....        | .....                   | 1  | 1 | S03 |
| .....                    | acacacagcagccacagacgu    | .....      | .....                         | .....        | .....                   | 6  | 0 | S03 |
| .....                    | acacacagcagAacacagacgu   | .....      | .....                         | .....        | .....                   | 2  | 1 | S03 |
| .....                    | acacacagcagccacagacguc   | .....      | .....                         | .....        | .....                   | 1  | 0 | S03 |
| .....                    | acacacagcagccacagacUucu  | .....      | .....                         | .....        | .....                   | 1  | 1 | S03 |
| .....                    | cacGcggacagccacagacgu    | .....      | .....                         | .....        | .....                   | 1  | 1 | S03 |
| .....                    | cUacggacagccacagacgu     | .....      | .....                         | .....        | .....                   | 1  | 1 | S03 |
| .....                    | cacacagcagccacagacguc    | .....      | .....                         | .....        | .....                   | 3  | 0 | S03 |
| .....                    | cacacagcagccacagacguA    | .....      | .....                         | .....        | .....                   | 1  | 1 | S03 |
| .....                    | acaGggacagccacagacgu     | .....      | .....                         | .....        | .....                   | 1  | 1 | S03 |
| .....                    | acacagcagccacagacgu      | .....      | .....                         | .....        | .....                   | 1  | 0 | S03 |
| .....                    | acacagcagccacagacguc     | .....      | .....                         | .....        | .....                   | 2  | 0 | S03 |
| .....                    | cacggacagccacagacgu      | .....      | .....                         | .....        | .....                   | 2  | 0 | S03 |
| .....                    | cacggacaCccacagacguc     | .....      | .....                         | .....        | .....                   | 1  | 1 | S03 |
| .....                    | cacggacagccacagacguc     | .....      | .....                         | .....        | .....                   | 1  | 0 | S03 |
| .....                    | cacagacgucuuugugugac     | .....      | .....                         | .....        | .....                   | 1  | 1 | S03 |
| .....                    | aGagacgucuuugugugcuga    | .....      | .....                         | .....        | .....                   | 1  | 1 | S03 |
| .....                    | cagacgucGugugugcug       | .....      | .....                         | .....        | .....                   | 1  | 1 | S03 |
| .....                    | cagacgucuuugugugcugacaga | .....      | .....                         | .....        | .....                   | 1  | 0 | S03 |
| .....                    | agGcguuuuguguguc         | .....      | .....                         | .....        | .....                   | 1  | 1 | S03 |
| .....                    | agacgucuuugugugcugaca    | .....      | .....                         | .....        | .....                   | 1  | 0 | S03 |
| .....                    | agacgucuuugugugcugacaga  | .....      | .....                         | .....        | .....                   | 1  | 0 | S03 |
| .....                    | agacgucuuuUugugcugacaga  | .....      | .....                         | .....        | .....                   | 1  | 1 | S03 |
| .....                    | acgucuuugugucugacaga     | .....      | .....                         | .....        | .....                   | 1  | 1 | S03 |
| .....                    | acAucuuugugugcugaca      | .....      | .....                         | .....        | .....                   | 1  | 1 | S03 |
| .....                    | acAucuuugugugcugacag     | .....      | .....                         | .....        | .....                   | 1  | 1 | S03 |
| .....                    | acgucuuugugugcugacaga    | .....      | .....                         | .....        | .....                   | 1  | 0 | S03 |
| .....                    | acgucuuugugugcugacagaca  | .....      | .....                         | .....        | .....                   | 1  | 0 | S03 |
| .....                    | cugucuuugugugcugaca      | .....      | .....                         | .....        | .....                   | 1  | 0 | S03 |
| .....                    | gucuuugugugcugaca        | .....      | .....                         | .....        | .....                   | 1  | 0 | S03 |
| .....                    | gucUgugugugcugacaga      | .....      | .....                         | .....        | .....                   | 1  | 1 | S03 |
| .....                    | Aucuuugugugcugacagaca    | .....      | .....                         | .....        | .....                   | 1  | 1 | S03 |
| .....                    | gucuuugugugcugaGagaca    | .....      | .....                         | .....        | .....                   | 1  | 1 | S03 |
| .....                    | ucuuugugugcugacagaca     | .....      | .....                         | .....        | .....                   | 1  | 0 | S03 |
| .....                    | gugcugacagacacacagcagA   | .....      | .....                         | .....        | .....                   | 1  | 1 | S03 |
| .....                    | ugcugacagacacacagcagc    | .....      | .....                         | .....        | .....                   | 1  | 0 | S03 |
| .....                    | gcuAacagacacacagcag      | .....      | .....                         | .....        | .....                   | 1  | 1 | S03 |
| .....                    | gcugacagacacacagAacg     | .....      | .....                         | .....        | .....                   | 1  | 1 | S03 |
| .....                    | gcugacagacacacagAacgucc  | .....      | .....                         | .....        | .....                   | 1  | 1 | S03 |
| .....                    | Cacacacagcaguccugu       | .....      | .....                         | .....        | .....                   | 1  | 1 | S03 |
| .....                    | acacacagcaguccugu        | .....      | .....                         | .....        | .....                   | 1  | 0 | S03 |
| .....                    | cacacacagcaguccuAgu      | .....      | .....                         | .....        | .....                   | 1  | 1 | S03 |
| .....                    | caGagacgucugugugc        | .....      | .....                         | .....        | .....                   | 1  | 1 | S04 |
| .....                    | caGagacgucugugugc        | .....      | .....                         | .....        | .....                   | 1  | 1 | S04 |
| .....                    | cacagacgucugugugcG       | .....      | .....                         | .....        | .....                   | 3  | 1 | S04 |
| .....                    | cacagacgucugugugc        | .....      | .....                         | .....        | .....                   | 11 | 0 | S04 |
| .....                    | cacagacgGccugugugc       | .....      | .....                         | .....        | .....                   | 2  | 1 | S04 |
| .....                    | Nacagacgucugugugc        | .....      | .....                         | .....        | .....                   | 1  | 1 | S04 |
| .....                    | Gacagacgucugugugcua      | .....      | .....                         | .....        | .....                   | 1  | 1 | S04 |
| .....                    | caAagacgucugugugcua      | .....      | .....                         | .....        | .....                   | 1  | 1 | S04 |
| .....                    | cacagacgucuuugugugcua    | .....      | .....                         | .....        | .....                   | 1  | 1 | S04 |
| .....                    | cacagacgucugugugcC       | .....      | .....                         | .....        | .....                   | 6  | 1 | S04 |
| .....                    | cacUgacgucugugugcua      | .....      | .....                         | .....        | .....                   | 2  | 1 | S04 |

Mature

Star

| Sequence                  | Mature Count | Star Count | Category |
|---------------------------|--------------|------------|----------|
| nnnnnnnnnnnnnnnnnnnnnnca  | 1            | 1          | S04      |
| .cCagacguccugugugucua     | 1            | 1          | S04      |
| .cacagacguccugugugucua    | 1            | 1          | S04      |
| .Aacagacguccugugugucuaacg | 1            | 1          | S04      |
| .acagacguccugugugug       | 1            | 0          | S04      |
| .acagacguccugugugugc      | 5            | 0          | S04      |
| .acagacgucGugugugucU      | 2            | 1          | S04      |
| .acagacguccugugugugcG     | 4            | 1          | S04      |
| .acagacguccugugugugucU    | 67           | 0          | S04      |
| .acagacgGccugugugugucU    | 1            | 1          | S04      |
| .acagacguccugAgugugucU    | 1            | 1          | S04      |
| .acagacguccugugugucua     | 2            | 0          | S04      |
| .acUgacguccugugugugucua   | 1            | 1          | S04      |
| .acagacguccugugugugucU    | 2            | 1          | S04      |
| .acaAacguccugugugucua     | 1            | 1          | S04      |
| .aAagacguccugugugucua     | 1            | 1          | S04      |
| .acagacguccugGugugucua    | 1            | 1          | S04      |
| .acagacguccuAugugugucuaa  | 1            | 1          | S04      |
| .acagacguccugugugucUca    | 1            | 1          | S04      |
| .aUgacguccugugugucuaac    | 1            | 1          | S04      |
| .acagacguccugugugucuaacg  | 4            | 0          | S04      |
| .acagacgucAugugugucuaacg  | 1            | 1          | S04      |
| .aUgacguccugugugucuaacg   | 1            | 1          | S04      |
| .acagacAuccugugugucuaacg  | 1            | 1          | S04      |
| .cagacguccugugugugc       | 6            | 0          | S04      |
| .cagacguccugugugugucU     | 69           | 0          | S04      |
| .cagacguccugugugugcG      | 5            | 1          | S04      |
| .cagacguUcugugugucua      | 1            | 1          | S04      |
| .cagacguccugAgugucua      | 1            | 1          | S04      |
| .cagaGguccugugugucua      | 1            | 1          | S04      |
| .cagacguccugugugucUc      | 4            | 1          | S04      |
| .cagacguccugugugucua      | 2            | 0          | S04      |
| .cUgacguccugugugucua      | 1            | 1          | S04      |
| .cagacguccugugugucAa      | 1            | 1          | S04      |
| .cagacguccugugugucuaa     | 1            | 0          | S04      |
| .cagacguUcugugugucuaa     | 1            | 1          | S04      |
| .caAacguccugugugucuaac    | 1            | 1          | S04      |
| .cagacguccugugugucuaac    | 1            | 1          | S04      |
| .cagacguccugugugucUcac    | 1            | 1          | S04      |
| .cagacguccugUugugucuaac   | 1            | 1          | S04      |
| .cagacguccugugugucuaac    | 2            | 0          | S04      |
| .cagacguccugugugucuaacg   | 1            | 0          | S04      |
| .Aagacguccugugugucuaacgg  | 1            | 1          | S04      |
| .cagacguccugugugucuaacgg  | 2            | 0          | S04      |
| .cagacguccugugugucuaacgU  | 1            | 1          | S04      |
| .agacguccugugugugcG       | 3            | 1          | S04      |
| .agacguccugugugugucU      | 14           | 0          | S04      |
| .NgacguccugugugucU        | 2            | 1          | S04      |
| .agacguccugugugAgcu       | 1            | 1          | S04      |
| .agacguccugugugucua       | 3            | 0          | S04      |
| .agacguccugugugucUca      | 1            | 1          | S04      |
| .agaAguccugugugucua       | 1            | 1          | S04      |
| .agacguccugugugucuaaU     | 1            | 1          | S04      |
| .agacguccugugugucuaac     | 1            | 0          | S04      |
| .Ugacguccugugugucuaacg    | 1            | 1          | S04      |
| .agacguccugugugucuaacg    | 2            | 0          | S04      |
| .agacguccugugugucUcag     | 1            | 1          | S04      |
| .agacguccugugugucuaGcg    | 1            | 1          | S04      |
| .agacguAacugugugucuaacg   | 1            | 1          | S04      |
| .Cgacguccugugugucuaacg    | 1            | 1          | S04      |
| .agacguccugugugucuaacgA   | 1            | 1          | S04      |
| .gacguccugugugucGa        | 1            | 1          | S04      |
| .gacguccugugugucua        | 4            | 0          | S04      |
| .gacguccugugugucuaa       | 1            | 0          | S04      |
| .gacguccugugugucuaac      | 1            | 0          | S04      |
| .gacguccugugugucuaaA      | 1            | 1          | S04      |
| .gacguccugugugucuaacgg    | 2            | 0          | S04      |
| .Aacguccugugugucuaacgg    | 1            | 1          | S04      |
| .acguccGgugugucuaac       | 1            | 1          | S04      |
| .acguccugugugucuaacgg     | 5            | 0          | S04      |
| .acguccugugugucuaacgga    | 1            | 0          | S04      |

Mature

Star

| Sequence                                                                               | Mature | Star | Category |
|----------------------------------------------------------------------------------------|--------|------|----------|
| nnnnnnnnnnnnnnnnnnnnnnca                                                               | 1      | 1    | S04      |
| cgagcgcuccugugugucuaaacgggacacacacagccacagcagcucuuugugugucagacagacacacaggaaguccugugugu | 1      | 1    | S04      |
| acguccugugugucuaaAagga                                                                 | 1      | 1    | S04      |
| cguccugugugucuaaacgg                                                                   | 2      | 0    | S04      |
| cguccugugugucuaaacggg                                                                  | 1      | 1    | S04      |
| cgucAcugugugucuaaacgggac                                                               | 1      | 1    | S04      |
| cgucAugugugucuaaacgggac                                                                | 1      | 1    | S04      |
| gCccugugugucuaaacg                                                                     | 1      | 1    | S04      |
| guccugugugucuaaacgggaca                                                                | 1      | 1    | S04      |
| uccugugugucuaUcggac                                                                    | 1      | 1    | S04      |
| uccugugugucuaaacgggaca                                                                 | 4      | 0    | S04      |
| uccugugGgugcuaaacgggaca                                                                | 1      | 1    | S04      |
| uccugugugucuaaacgggacacU                                                               | 1      | 1    | S04      |
| ccugugugucuaaacggg                                                                     | 1      | 0    | S04      |
| ccugugugucuaaacgggac                                                                   | 1      | 0    | S04      |
| ccugugugucuaaacgggCca                                                                  | 1      | 1    | S04      |
| ccugugugucuaaacgggaca                                                                  | 5      | 0    | S04      |
| ccugugugucuaaacUgaca                                                                   | 1      | 1    | S04      |
| ccugugugucuaaacgggacU                                                                  | 1      | 1    | S04      |
| ccugugugucuaaacgggaaaca                                                                | 1      | 1    | S04      |
| ccugugugucuaaacgggacaca                                                                | 1      | 0    | S04      |
| cugugugucuaaacgggac                                                                    | 2      | 0    | S04      |
| cugugugucuaaacgggacU                                                                   | 1      | 1    | S04      |
| Gugugugucuaaacgggaca                                                                   | 1      | 1    | S04      |
| ugucuaaacgggacacacGacggg                                                               | 1      | 1    | S04      |
| gugcuaaacgggacacacGacg                                                                 | 1      | 1    | S04      |
| gugcuaaacgggacacacagggacC                                                              | 1      | 1    | S04      |
| gugcuaaacgggacacacagggaca                                                              | 1      | 0    | S04      |
| gugcuaaacgggacacacagggacag                                                             | 1      | 0    | S04      |
| ugcuaaacgggacacacacAgaca                                                               | 1      | 1    | S04      |
| ugcuaaacgggacacacacagggaca                                                             | 2      | 0    | S04      |
| ugcuaaacgggacacacacagggacagc                                                           | 1      | 0    | S04      |
| ugcuaaacgggacacacacagggacaCc                                                           | 1      | 1    | S04      |
| gcuaacgggacacacacagggaca                                                               | 1      | 0    | S04      |
| cuaaacgggacacacacUggacag                                                               | 1      | 1    | S04      |
| uaaacgggacacacacagggacagU                                                              | 1      | 1    | S04      |
| uaaacgggacacacacagggacagcA                                                             | 1      | 1    | S04      |
| uaaacgggacacacacagggacagcU                                                             | 1      | 1    | S04      |
| uaaacgggacacacacAgacagcc                                                               | 1      | 1    | S04      |
| uaaAagggacacacacagggacagcc                                                             | 1      | 1    | S04      |
| aacgggacacacacagggacagcc                                                               | 1      | 0    | S04      |
| acgggacGcacacagggacagc                                                                 | 1      | 1    | S04      |
| acgggacacacacagggacagcc                                                                | 2      | 0    | S04      |
| acggUcacacacagggacagcc                                                                 | 1      | 1    | S04      |
| acggacacacacagggacagcca                                                                | 6      | 0    | S04      |
| acggacacacacUcggacagccac                                                               | 1      | 1    | S04      |
| acggacacacacGcggacagccac                                                               | 1      | 1    | S04      |
| acggacacacacagggacagccUc                                                               | 1      | 1    | S04      |
| acggacacacacagggacagccac                                                               | 8      | 0    | S04      |
| acggacacacacagCacagccaca                                                               | 1      | 1    | S04      |
| acggacacacacagggacagccaca                                                              | 9      | 0    | S04      |
| cggacacacacagggacagcc                                                                  | 7      | 0    | S04      |
| cggacacacCcacggacagcca                                                                 | 1      | 1    | S04      |
| cggGcacacacagggacagcca                                                                 | 1      | 1    | S04      |
| cggacacacacagggacagccU                                                                 | 1      | 1    | S04      |
| cggacacacacagggacagcca                                                                 | 8      | 0    | S04      |
| cggacacacacCgacagcca                                                                   | 1      | 1    | S04      |
| cggacacacacagggacagccG                                                                 | 1      | 1    | S04      |
| cggacacacacagggacagccac                                                                | 3      | 0    | S04      |
| cggUcacacacagggacagccac                                                                | 1      | 1    | S04      |
| cggacacacacagggacagcGac                                                                | 1      | 1    | S04      |
| cggacacacacagggacagccaca                                                               | 29     | 0    | S04      |
| cgUacacacacagggacagccaca                                                               | 1      | 1    | S04      |
| cggacacacacagggacagUcaca                                                               | 2      | 1    | S04      |
| cggacacacacagggacaUccaca                                                               | 1      | 1    | S04      |
| cggacacacacagggacagccaAa                                                               | 1      | 1    | S04      |
| cggacacacacagggacCgcca                                                                 | 1      | 1    | S04      |
| cggacacacacagggacagccaca                                                               | 1      | 1    | S04      |
| Nggacacacacagggacagccaca                                                               | 1      | 1    | S04      |
| cggacacacacagggGcagccaca                                                               | 1      | 1    | S04      |
| cggacacacacagggacagccCca                                                               | 1      | 1    | S04      |
| cggacacacacagggacagccacaC                                                              | 1      | 1    | S04      |

Mature

Star

nnnnnnnnnnnnnnnnnnnnnnca cagacgucugugugucuaacggacacacacagggacagccacagacgucuuugugugucagacagacacacacggacgucugugugu

|                                  |    |   |     |
|----------------------------------|----|---|-----|
| .gacacacacggacagccG.....         | 1  | 1 | S04 |
| .gacacacacggacagccaca.....       | 1  | 0 | S04 |
| .gacacacacggacagccaAa.....       | 1  | 1 | S04 |
| .acacacacggacagccaca.....        | 1  | 0 | S04 |
| .acacCcacggacagccaca.....        | 1  | 1 | S04 |
| .acacacacggacagccacag.....       | 1  | 0 | S04 |
| .acacacacggacagccacaga.....      | 4  | 0 | S04 |
| .acacacacggacagccacagG.....      | 1  | 1 | S04 |
| .acacacacggacagccacagac.....     | 2  | 0 | S04 |
| .acacacacggacagccaGagacg.....    | 1  | 1 | S04 |
| .acacacacggacagcAacagacg.....    | 1  | 1 | S04 |
| .Ncacacacggacagccacagacg.....    | 1  | 1 | S04 |
| .acacacacggacagccacagacg.....    | 4  | 0 | S04 |
| .acacacUcggacagccacagacgu.....   | 1  | 1 | S04 |
| .acacacacggacagAacagacgu.....    | 1  | 1 | S04 |
| .acacacacggacagcAacagacgu.....   | 1  | 1 | S04 |
| .acGcacacggacagccacagacgu.....   | 1  | 1 | S04 |
| .acacacacggacCgccaacagacgu.....  | 2  | 1 | S04 |
| .acacacacggacagccacagacgu.....   | 12 | 0 | S04 |
| .cacacacggacagccaca.....         | 2  | 0 | S04 |
| .cacacacggacagAacacaga.....      | 1  | 1 | S04 |
| .cacacacggacagcGacaga.....       | 1  | 1 | S04 |
| .cacacacggacagccacaga.....       | 2  | 0 | S04 |
| .cacacacggacagccacagac.....      | 1  | 0 | S04 |
| .cacacacggacagccacagaA.....      | 1  | 1 | S04 |
| .cacacacggacagAacacagacg.....    | 2  | 1 | S04 |
| .cacacacggacagccacagacg.....     | 10 | 0 | S04 |
| .cacacacggacagcGacagacg.....     | 1  | 1 | S04 |
| .cacacacggaGagccaacagacg.....    | 1  | 1 | S04 |
| .cacacacggacagAacacagacgu.....   | 1  | 1 | S04 |
| .cacacacggacCgccaacagacgu.....   | 1  | 1 | S04 |
| .cacacacggacagccacagacgu.....    | 9  | 0 | S04 |
| .cacGcacggacagccaacagacgu.....   | 1  | 1 | S04 |
| .cacacacggacagccacagacgG.....    | 1  | 1 | S04 |
| .cacacGcggacagccacagacgu.....    | 1  | 1 | S04 |
| .cacacacggacagccaacagacguc.....  | 1  | 0 | S04 |
| .cacacacggacagccaacagacguA.....  | 1  | 1 | S04 |
| .Aacacacggacagccacagacguc.....   | 1  | 1 | S04 |
| .cacacacggacagcAacagacguc.....   | 1  | 1 | S04 |
| .Gcacacggacagccaacagac.....      | 1  | 1 | S04 |
| .acacacggacagccaacagacg.....     | 6  | 0 | S04 |
| .acCcacggacagccaacagacg.....     | 1  | 1 | S04 |
| .acacacggacagAacacagacgu.....    | 4  | 1 | S04 |
| .acacacggacagcccCagacgu.....     | 1  | 1 | S04 |
| .Gcacacggacagccaacagacgu.....    | 1  | 1 | S04 |
| .acacacggacagcAacacagacgu.....   | 1  | 1 | S04 |
| .acacacggacCgccaacagacgu.....    | 1  | 1 | S04 |
| .acacacggacagccaacagacgu.....    | 58 | 0 | S04 |
| .acacUcggacagccaacagacgu.....    | 3  | 1 | S04 |
| .acacacggacagGcacagacgu.....     | 1  | 1 | S04 |
| .acacacggacagccaacagacgG.....    | 4  | 1 | S04 |
| .acCcacggacagccaacagacgu.....    | 2  | 1 | S04 |
| .acacacggacagccaacagacguA.....   | 1  | 1 | S04 |
| .acacacggacagccaacagacguc.....   | 2  | 0 | S04 |
| .acacacggacagccaacagacgucuu..... | 1  | 0 | S04 |
| .cacacggacagcccUcagacg.....      | 1  | 1 | S04 |
| .cacacggacagccaacagacg.....      | 5  | 0 | S04 |
| .cacacggacagccaacagacgu.....     | 24 | 0 | S04 |
| .cCcacggacagccaacagacguc.....    | 1  | 1 | S04 |
| .cacacggacagcccCagacguc.....     | 1  | 1 | S04 |
| .cacacggacagccaacagacguc.....    | 16 | 0 | S04 |
| .cacacggacagccaCgacguc.....      | 1  | 1 | S04 |
| .cGcacggacagccaacagacguc.....    | 1  | 1 | S04 |
| .cacacggacagccaacagacguUu.....   | 1  | 1 | S04 |
| .acacggacagccaacagac.....        | 1  | 0 | S04 |
| .acacggacagccaacagacg.....       | 5  | 0 | S04 |
| .acacggacagcccGcagacgu.....      | 1  | 1 | S04 |
| .acGcggacagccaacagacgu.....      | 1  | 1 | S04 |
| .acUcggacagccaacagacgu.....      | 1  | 1 | S04 |
| .acacggacagccaacagacgu.....      | 13 | 0 | S04 |





Mature

Star

| Sequence                     | Mature | Star | Category |
|------------------------------|--------|------|----------|
| nnnnnnnnnnnnnnnnnnnnnnca     | 3      | 0    | S04      |
| acgucuuugugugugucugaca       | 1      | 1    | S04      |
| acgucuuugugugugucugCca       | 1      | 1    | S04      |
| acgucuuugugugugucugacU       | 1      | 1    | S04      |
| acgucuuugugugugucugaca       | 1      | 1    | S04      |
| acgucuuugugugugucugacGag     | 1      | 1    | S04      |
| acgucuuugugugugucugacaga     | 1      | 1    | S04      |
| acgucuuugugugugucugGcaga     | 1      | 1    | S04      |
| acgucuuugugugugucugacagG     | 1      | 1    | S04      |
| acguAuugugugugucugacaga      | 1      | 1    | S04      |
| acgucuuugugugugucugacaCa     | 3      | 1    | S04      |
| acgucuuugugugugucugacGaga    | 2      | 1    | S04      |
| acgucuuugugugugucugCcaga     | 1      | 1    | S04      |
| acgGcuugugugugucugacaga      | 1      | 1    | S04      |
| acgucuuugugugugucugacagU     | 1      | 1    | S04      |
| acgucuuugugugugucugacaga     | 5      | 0    | S04      |
| acgCcuugugugugucugacaga      | 1      | 1    | S04      |
| acgucuuugugugugucugacagaca   | 1      | 0    | S04      |
| cgucuuugugugugucugac         | 2      | 0    | S04      |
| cgucuuugugugugucugacC        | 1      | 1    | S04      |
| cAuucuuugugugugucugaca       | 1      | 1    | S04      |
| cgucuuugugugugucugaca        | 1      | 0    | S04      |
| cgucuuugugugugucugCca        | 1      | 1    | S04      |
| cAuucuuugugugugucugacaga     | 1      | 1    | S04      |
| cgucuuugugugugucugacagaca    | 4      | 0    | S04      |
| .gucuuugugugugucugaca        | 4      | 0    | S04      |
| .gucuuuguCugugucugaca        | 1      | 1    | S04      |
| .gucuuugugugugucugGcaga      | 1      | 1    | S04      |
| .Auucuuugugugugucugacaga     | 1      | 1    | S04      |
| .Auucuuugugugugucugacagaca   | 1      | 1    | S04      |
| .ucuuugugugugucugUcagaca     | 1      | 1    | S04      |
| .ucuuugugugugucugacagaca     | 1      | 0    | S04      |
| .cuugugugugucugacagacC       | 1      | 1    | S04      |
| .cuugugugugucugaUagaca       | 1      | 1    | S04      |
| .cuugugugugucugaGagaca       | 1      | 1    | S04      |
| .cuugugugugucugacagacacC     | 1      | 1    | S04      |
| .cuugugugugucugacagacaGa     | 1      | 1    | S04      |
| .cuugugugGgcugacagacaca      | 1      | 1    | S04      |
| .cuugugugugucugacagaGaca     | 1      | 1    | S04      |
| .ugugugucugacagacacacacggacU | 1      | 1    | S04      |
| .ugugcGgacagacacacacgga      | 1      | 1    | S04      |
| .gugcugaUagacacacacgg        | 1      | 1    | S04      |
| .gugcugacagacacacacUgac      | 1      | 1    | S04      |
| .gugcugacagacacacacgAacg     | 1      | 1    | S04      |
| .gugcugacagacacacacggacg     | 1      | 0    | S04      |
| .gugcugacagacacacacggacgu    | 1      | 0    | S04      |
| .ugcugacagacacacaAgga        | 1      | 1    | S04      |
| .ugcugacagacacacacgAacg      | 2      | 1    | S04      |
| .ugcugacagacacacacggacU      | 1      | 1    | S04      |
| .ugcugacagacacacacggacg      | 1      | 1    | S04      |
| .ugcugacagacacacacggacgG     | 2      | 1    | S04      |
| .ugcugacagaUacacacggacgu     | 1      | 1    | S04      |
| .ugcugacagacacacacgAacgu     | 1      | 1    | S04      |
| .gcugacagacacacacggacg       | 1      | 0    | S04      |
| .gcugacagacacUcacggacgu      | 1      | 1    | S04      |
| .gcugacagacaUacacggacgu      | 1      | 1    | S04      |
| .gcugacaAacacacacggacgu      | 1      | 1    | S04      |
| .gcugacagacacacacggacgu      | 3      | 0    | S04      |
| .cugacagacacaGacggacg        | 1      | 1    | S04      |
| .cugacagacacacacggacg        | 2      | 0    | S04      |
| .ugacagacacacacggacgu        | 1      | 0    | S04      |
| .ugacagacacaAacggacgu        | 1      | 1    | S04      |
| .ugacagacacacacggacguU       | 1      | 1    | S04      |
| .ugacagacacUcacggacgucc      | 1      | 1    | S04      |
| .ugacaAacacacacggacguccu     | 1      | 1    | S04      |
| .gacagacacacacggacgu         | 1      | 0    | S04      |
| .acagacacacacggacgucc        | 1      | 0    | S04      |
| .acagacacacGcggacguccu       | 2      | 1    | S04      |
| .acagacacacacggacguccugug    | 1      | 0    | S04      |
| .cagacacacacacggacguccug     | 1      | 0    | S04      |
| .cagacacacacacggacguccugu    | 2      | 0    | S04      |





Star

Mature

|                                                                                                                        |    |   |     |
|------------------------------------------------------------------------------------------------------------------------|----|---|-----|
| auuuugugggaagcuucgucagucagaauaggguuaaagguucaccgaagggaauuggaauucuaacggguuggaucuucugugucugguuuuucgugaagcuggucgucacaguucu |    |   |     |
| .gguuuggaucuucugugucugg                                                                                                | 1  | 0 | S03 |
| .gguuuggaucuucugugucugggu                                                                                              | 1  | 0 | S03 |
| .guugAaucuucugugucug                                                                                                   | 1  | 1 | S03 |
| .guuggaucuucugugucuggguu                                                                                               | 1  | 0 | S03 |
| .uuggaucuucugugucugggu                                                                                                 | 5  | 0 | S03 |
| .uugAaucuucugugucugggu                                                                                                 | 1  | 1 | S03 |
| .uuggaucuucugugucuggguu                                                                                                | 2  | 0 | S03 |
| .uuggaucuucugugucuggguuu                                                                                               | 4  | 0 | S03 |
| .uggaucuucugugucugg                                                                                                    | 1  | 0 | S03 |
| .uggaucuucugugucuggg                                                                                                   | 2  | 0 | S03 |
| .uggaucuucugugucuggguC                                                                                                 | 1  | 1 | S03 |
| .uggaucuucugugucuggguu                                                                                                 | 1  | 0 | S03 |
| .uggaucuucugugucuggguuuu                                                                                               | 5  | 0 | S03 |
| .ggaucuucugugucuggg                                                                                                    | 1  | 0 | S03 |
| .ggaucuucugugucuggguC                                                                                                  | 1  | 1 | S03 |
| .ggaucuucugugucuggguu                                                                                                  | 1  | 0 | S03 |
| .gaucucugugucugggA                                                                                                     | 1  | 1 | S03 |
| .aucuucugugucugggu                                                                                                     | 2  | 0 | S03 |
| .aucuucugugucuggguuuuc                                                                                                 | 1  | 0 | S03 |
| .ucucugugucuggguuuucC                                                                                                  | 1  | 1 | S03 |
| .ugugucuggguuuucCugaagc                                                                                                | 1  | 1 | S03 |
| .agucaauggguuaaagguucaccg                                                                                              | 1  | 0 | S04 |
| .agguucaccgaagggaau                                                                                                    | 6  | 0 | S04 |
| .agguucaccgaagggaauuggauA                                                                                              | 1  | 1 | S04 |
| .uucaccgaagggaauugga                                                                                                   | 1  | 0 | S04 |
| .aacggguuggaucuucugu                                                                                                   | 2  | 0 | S04 |
| .aacggguuggaucuucugC                                                                                                   | 1  | 1 | S04 |
| .aacggguuggaucuucugucC                                                                                                 | 1  | 1 | S04 |
| .aacggguuggaucuucugug                                                                                                  | 1  | 0 | S04 |
| .aacggguuggaucuucugugC                                                                                                 | 1  | 1 | S04 |
| .aacggguuggaucuucugugug                                                                                                | 8  | 0 | S04 |
| .aacggguugCaucuucugugug                                                                                                | 1  | 1 | S04 |
| .aacggguuggaucuucugugCc                                                                                                | 2  | 1 | S04 |
| .aacggguuggaucuucuguguc                                                                                                | 4  | 0 | S04 |
| .aacggguuggaucuucugugucuc                                                                                              | 13 | 0 | S04 |
| .aacggguuggaucuucugugucC                                                                                               | 1  | 1 | S04 |
| .aacggguuggaucuucugugucA                                                                                               | 3  | 1 | S04 |
| .aacggguuggaucuucugugugAug                                                                                             | 1  | 1 | S04 |
| .aacggguuggaucuucugugucug                                                                                              | 11 | 0 | S04 |
| .aacggguuggaucuucugugucugg                                                                                             | 1  | 0 | S04 |
| .acggguuggaucuucuguu                                                                                                   | 2  | 0 | S04 |
| .acggguuggaucuucugug                                                                                                   | 1  | 0 | S04 |
| .acggguuggaucuucuguguc                                                                                                 | 2  | 0 | S04 |
| .acggguuggaucuucugugucA                                                                                                | 1  | 1 | S04 |
| .acggguuggaucuucugugucuc                                                                                               | 12 | 0 | S04 |
| .acggguuggaucuucugugucug                                                                                               | 1  | 0 | S04 |
| .acggguuggaucuucugugucugg                                                                                              | 5  | 0 | S04 |
| .cggguuggaucuucugug                                                                                                    | 1  | 0 | S04 |
| .cggguuggaucuucuguguc                                                                                                  | 2  | 0 | S04 |
| .cggCuggaucuucugugucuc                                                                                                 | 1  | 1 | S04 |
| .cggguuggaucuucugugucA                                                                                                 | 1  | 1 | S04 |
| .cggguuggaucuucugugucC                                                                                                 | 2  | 1 | S04 |
| .cggguuggaucuucugugucuc                                                                                                | 10 | 0 | S04 |
| .cggguuggaucuucugugucug                                                                                                | 3  | 0 | S04 |
| .ggguuggaucuucugugucC                                                                                                  | 1  | 1 | S04 |
| .ggguuggaucuucuguguc                                                                                                   | 1  | 0 | S04 |
| .ggguuggaucuucugugucugggu                                                                                              | 1  | 0 | S04 |
| .uuggaucuucugugucugg                                                                                                   | 2  | 0 | S04 |
| .uuggaucuucugugucugggA                                                                                                 | 1  | 1 | S04 |
| .uuggaucuucugugucugggu                                                                                                 | 5  | 0 | S04 |
| .uuggaucuucugugucugggAu                                                                                                | 1  | 1 | S04 |
| .uuggaucuucugugucugggAuu                                                                                               | 3  | 1 | S04 |
| .uuggaucuucugugucuggguuu                                                                                               | 1  | 0 | S04 |
| .uuggaucuucugugucuggguuC                                                                                               | 1  | 1 | S04 |
| .uggaucuucugugucugg                                                                                                    | 1  | 0 | S04 |
| .uggaucuucugugucugggu                                                                                                  | 3  | 0 | S04 |
| .uggaucuucugugucuggguuu                                                                                                | 2  | 0 | S04 |
| .uggaucuucugugucugggAuuu                                                                                               | 1  | 1 | S04 |
| .uggaucuucugugucuggguuuu                                                                                               | 1  | 0 | S04 |

Star

Mature

|                                                                                                                     |   |   |     |
|---------------------------------------------------------------------------------------------------------------------|---|---|-----|
| auuuugugggaagcuucgucagucaauggguuaaagguucacccaagggaauuggaauucaacggguuggaucuucuguugucuggguuuucgugaagcuggucgucacaguucu |   |   |     |
| .....uggaucuucuguuNucuggguuuu.....                                                                                  | 1 | 1 | S04 |
| .....uggaucuucuguuugucuggguuuu.....                                                                                 | 3 | 0 | S04 |
| .....gaucuucuguugucuggguuu.....                                                                                     | 1 | 0 | S04 |
| .....gaucuucuguugucuggguuu.....                                                                                     | 1 | 0 | S04 |
| .....Uaucuucuguugucuggguuuucg.....                                                                                  | 1 | 1 | S04 |
| .....aucuucuguugucugggu.....                                                                                        | 1 | 0 | S04 |
| .....aucuucuguugucuggguuuu.....                                                                                     | 2 | 0 | S04 |
| .....aucuucuguugucuggguuuuc.....                                                                                    | 1 | 0 | S04 |
| .....ucuucuguugucuggguuuucC.....                                                                                    | 1 | 1 | S04 |



## Mature

## Star

|                                                                                                                          |   |   |     |
|--------------------------------------------------------------------------------------------------------------------------|---|---|-----|
| gugac <b>cgagc</b> gaucgucccgucgguagcuacguagcgaccgagcucaagccaaagcucggucgcuacguagcgacugagcacuucucacucggucgcuacgcaacgaccgg |   |   |     |
| .....aagccaaagcucggucgcuGgua.....                                                                                        | 1 | 1 | S04 |
| .....aagccaaGgcucggucgcuacgua.....                                                                                       | 1 | 1 | S04 |
| .....gcucggucgcuacguagcg.....                                                                                            | 1 | 0 | S04 |
| .....cgcuacguagcgacugagc.....                                                                                            | 1 | 0 | S04 |
| .....gcuacguagcgacugagcUcuucu.....                                                                                       | 1 | 1 | S04 |

Provisional ID : chrAnn\_random\_3038174  
 Score total : 0.4  
 Score for star read(s) : -1.3  
 Score for read counts : 0  
 Score for mfe : 1.7  
 Score for randfold : 0  
 Score for cons. seed :  
 Total read count : 76  
 Mature read count : 76  
 Loop read count : 0  
 Star read count : 0

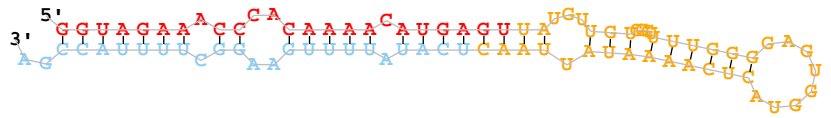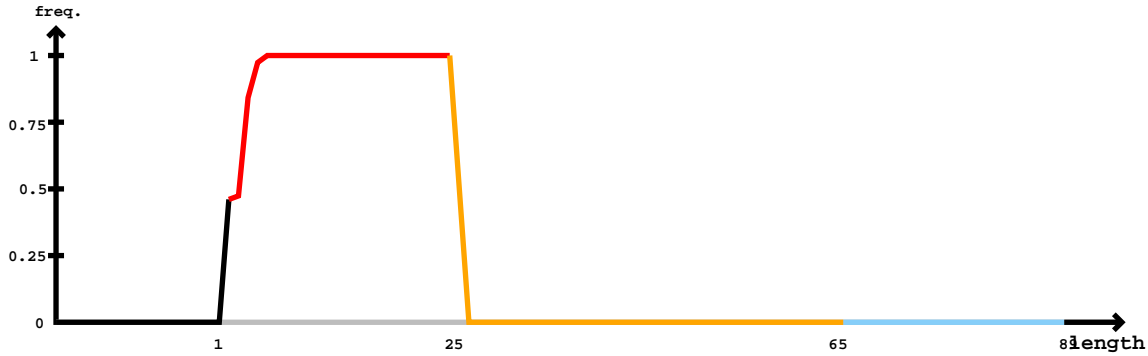

**Mature**

**Star**

| 5' -  | gauuucccauacuc | ggua  | gaaacccacaaa | caugaguu | auguuguggcuuuuggggagugguacucaaaaauuuuacuc | cauuuuugaaggcuuuuaccga | guaug | -3'   | exp   | reads | mm | sample |
|-------|----------------|-------|--------------|----------|-------------------------------------------|------------------------|-------|-------|-------|-------|----|--------|
| ..... | .....          | ..... | .....        | .....    | .....                                     | .....                  | ..... | ..... | ..... | 24    | 1  | S03    |
| ..... | .....          | ..... | .....        | .....    | .....                                     | .....                  | ..... | ..... | ..... | 1     | 1  | S03    |
| ..... | .....          | ..... | .....        | .....    | .....                                     | .....                  | ..... | ..... | ..... | 12    | 1  | S03    |
| ..... | .....          | ..... | .....        | .....    | .....                                     | .....                  | ..... | ..... | ..... | 6     | 1  | S03    |
| ..... | .....          | ..... | .....        | .....    | .....                                     | .....                  | ..... | ..... | ..... | 1     | 1  | S03    |
| ..... | .....          | ..... | .....        | .....    | .....                                     | .....                  | ..... | ..... | ..... | 1     | 0  | S03    |
| ..... | .....          | ..... | .....        | .....    | .....                                     | .....                  | ..... | ..... | ..... | 11    | 1  | S04    |
| ..... | .....          | ..... | .....        | .....    | .....                                     | .....                  | ..... | ..... | ..... | 16    | 1  | S04    |
| ..... | .....          | ..... | .....        | .....    | .....                                     | .....                  | ..... | ..... | ..... | 1     | 0  | S04    |
| ..... | .....          | ..... | .....        | .....    | .....                                     | .....                  | ..... | ..... | ..... | 3     | 1  | S04    |







Provisional ID : chrAnn\_random\_3042427  
 Score total : 0  
 Score for star read(s) : -1.3  
 Score for read counts : 0  
 Score for mfe : 1.2  
 Score for randfold : 0  
 Score for cons. seed :  
 Total read count : 37  
 Mature read count : 37  
 Loop read count : 0  
 Star read count : 0

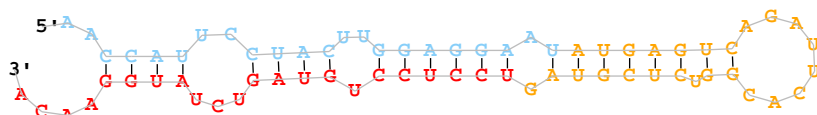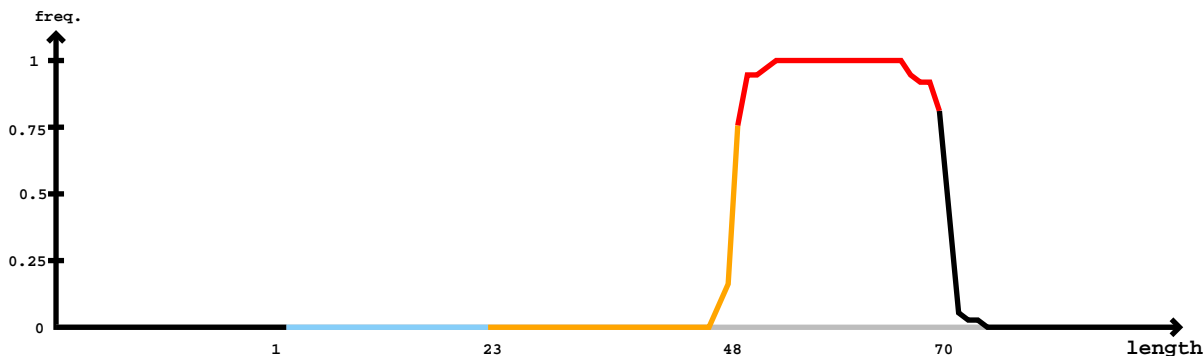

Star

Mature

| 5'                                                                                                                       | 3' | exp | reads | mm | sample |
|--------------------------------------------------------------------------------------------------------------------------|----|-----|-------|----|--------|
| gguucuugcuuugaauccguucaaccauuccuacugaggaaauagagucagauucaaggucugua <u>guccuccuguagucu</u> auggaacaauucauuuucgacgcgaaugcug |    |     |       |    |        |
| .....aguccuccuguagucuCuggaaca.....                                                                                       |    |     | 2     | 1  | S03    |
| .....guccuccuguagucuCuggaaca.....                                                                                        |    |     | 2     | 1  | S03    |
| .....uccuccuguagucuCuggaac.....                                                                                          |    |     | 2     | 1  | S03    |
| .....uccuccuguagucuCuggaaca.....                                                                                         |    |     | 9     | 1  | S03    |
| .....uccuccuguagucuUuggaaca.....                                                                                         |    |     | 1     | 1  | S03    |
| .....uccuccuguagucuCuggaacaa.....                                                                                        |    |     | 1     | 1  | S03    |
| .....ccuccuguagucuCuggaac.....                                                                                           |    |     | 1     | 1  | S03    |
| .....ccuccuguagucuCuggaaca.....                                                                                          |    |     | 3     | 1  | S03    |
| .....ccuccuguagucuCuggaacaa.....                                                                                         |    |     | 1     | 1  | S03    |
| .....ccuccuguagucuauuggaacaaauuc.....                                                                                    |    |     | 1     | 0  | S03    |
| .....uccuguagucuCuggaacaa.....                                                                                           |    |     | 1     | 1  | S03    |
| .....aguccuccuguagucuCuggaaca.....                                                                                       |    |     | 1     | 1  | S04    |
| .....guccuccuguagucuCuggaac.....                                                                                         |    |     | 1     | 1  | S04    |
| .....uccuccuguagucuCugg.....                                                                                             |    |     | 2     | 1  | S04    |
| .....uccuccuguagucuCugga.....                                                                                            |    |     | 1     | 1  | S04    |
| .....uccuccuguagucuCuggaaca.....                                                                                         |    |     | 5     | 1  | S04    |
| .....uccuccuguagucuCuggaacaa.....                                                                                        |    |     | 1     | 1  | S04    |
| .....ccuccuguagucuCuggaaca.....                                                                                          |    |     | 1     | 1  | S04    |
| .....ccuccuguagucuCuggaacaa.....                                                                                         |    |     | 1     | 1  | S04    |



Provisional ID : chrAnn\_random\_3077354  
 Score total : 1.7  
 Score for star read(s) : 3.9  
 Score for read counts : -3.3  
 Score for mfe : 1.3  
 Score for randfold : 0  
 Score for cons. seed :  
 Total read count : 5  
 Mature read count : 1  
 Loop read count : 0  
 Star read count : 4

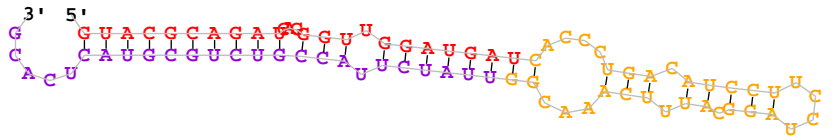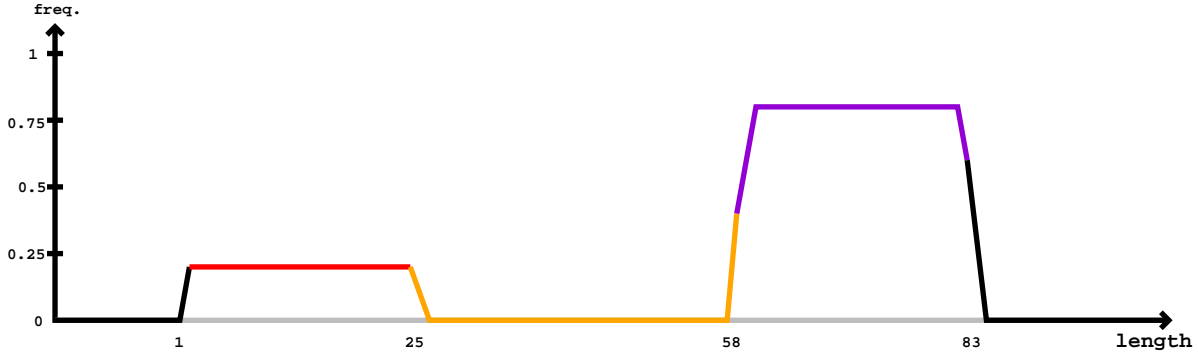

**Mature**

**Star**

|      |              |                        |                  |                   |                        |                |             |                              |                              |       |       |    |        |
|------|--------------|------------------------|------------------|-------------------|------------------------|----------------|-------------|------------------------------|------------------------------|-------|-------|----|--------|
| 5' - | uaucaccgcaag | <b>guacgcagaucaggg</b> | <b>uuggaugau</b> | <b>caccugacau</b> | <b>ccuuccuaggcauuu</b> | <b>caaacgg</b> | <b>uuau</b> | <b>cuuaccgucugcguacucacg</b> | caaacaccaagagaacuua          | -3'   | obs   |    |        |
|      | uaucaccgcaag | <b>guacgcagaucaggg</b> | <b>uuggaugau</b> | <b>caccugacau</b> | <b>ccuuccuaggcauuu</b> | <b>caaacgg</b> | <b>uuau</b> | <b>cuuaccgucugcguacucacg</b> | caaacaccaagagaacuua          |       | exp   |    |        |
|      | .....        | .....                  | .....            | .....             | .....                  | .....          | .....       | .....                        | .....                        |       | reads | mm | sample |
|      | .....        | <b>guacgcagaucaggg</b> | <b>uuggaugau</b> | .....             | .....                  | .....          | .....       | <b>uuau</b>                  | <b>cuuaccgucugcguacucacg</b> | ..... | 1     | 0  | S03    |
|      | .....        | .....                  | .....            | .....             | .....                  | .....          | .....       | .....                        | .....                        | ..... | 1     | 0  | S03    |
|      | .....        | .....                  | .....            | .....             | .....                  | .....          | .....       | .....                        | .....                        | ..... | 1     | 0  | S04    |
|      | .....        | .....                  | .....            | .....             | .....                  | .....          | .....       | .....                        | .....                        | ..... | 1     | 1  | S04    |
|      | .....        | .....                  | .....            | .....             | .....                  | .....          | .....       | .....                        | .....                        | ..... | 1     | 1  | S04    |



Star

Mature

ucuguccugcuaagcacguuugucuccggacaaaagaauacgggucaagucugucugucuuuccacuuuccuuguguuuugcggggauaugacguggucuuuguccugauuuauaga

|                                            |     |   |     |
|--------------------------------------------|-----|---|-----|
| .....auaGgacguggucuuuguccugauu.....        | 1   | 1 | S03 |
| .....auaugacguggucuuUuccugauu.....         | 1   | 1 | S03 |
| .....aAaugacguggucuuuguccugauu.....        | 1   | 1 | S03 |
| .....auaugacguggucuuuguUuccugauu.....      | 1   | 1 | S03 |
| .....auaugacguggucuuuguccCgauu.....        | 1   | 1 | S03 |
| .....auaugacguggucuuugAccugauu.....        | 2   | 1 | S03 |
| .....auaugacguggucuuuguccugauC.....        | 22  | 1 | S03 |
| .....auaugacguggucuuCguccugauu.....        | 2   | 1 | S03 |
| .....auaugacguggucuuuguccugauA.....        | 6   | 1 | S03 |
| .....auaugacguggucuuAguccugauu.....        | 1   | 1 | S03 |
| .....auaugacguggucuuuguccugauuA.....       | 1   | 1 | S03 |
| .....auaugacguggucuuuguccugauuuuA.....     | 12  | 0 | S03 |
| .....auaugacguggucuuuguccugauuuuG.....     | 1   | 1 | S03 |
| .....auaugacguggucuuUuccugauuuuA.....      | 1   | 1 | S03 |
| .....auaugacguggucuuuguccugauuuuU.....     | 1   | 1 | S03 |
| .....auaugacguggucuuuguccugauuuuau.....    | 3   | 0 | S03 |
| .....auaugacguggucuuuguccugauuuuAau.....   | 1   | 1 | S03 |
| .....auaugacguggucuuuguccugauuuuA.....     | 2   | 1 | S03 |
| .....auaugacguggucuuuguccugauuuuauG.....   | 7   | 0 | S03 |
| .....auaugacguggucuuuguccugauuuuauA.....   | 1   | 1 | S03 |
| .....auaugacguggucuuuguccugauuuuauG.....   | 1   | 1 | S03 |
| .....auaugacguggucuuuguccugauuuuauC.....   | 1   | 1 | S03 |
| .....auaugacguggucuuuguccugauuuuauAg.....  | 1   | 1 | S03 |
| .....auaugacguggucuuuguccugauuuuauU.....   | 2   | 1 | S03 |
| .....auaugacguggucuuuguccugauuuuauG.....   | 3   | 1 | S03 |
| .....auaugacguggucuuuguccugauuuuauG.....   | 2   | 1 | S03 |
| .....auaugacguggucuuuguccugauuuuauaga..... | 25  | 0 | S03 |
| .....uaugacguggucuuugucc.....              | 3   | 0 | S03 |
| .....uaugacguggucuuugucU.....              | 4   | 1 | S03 |
| .....uaugacguggucuuuguccug.....            | 5   | 0 | S03 |
| .....uaugacguggucuuuguccugG.....           | 2   | 1 | S03 |
| .....uaugGcguggucuuuguccuga.....           | 1   | 1 | S03 |
| .....uaugacguggucuuuguccuga.....           | 30  | 0 | S03 |
| .....uaugacguggucuuuguccugaA.....          | 2   | 1 | S03 |
| .....Caugacguggucuuuguccugau.....          | 1   | 1 | S03 |
| .....uaugaUguggucuuuguccugau.....          | 1   | 1 | S03 |
| .....uaugacguggucuuuguccugau.....          | 17  | 0 | S03 |
| .....uaugacguggucuuuguccugauA.....         | 10  | 1 | S03 |
| .....uaugacguggucuuuguccugauG.....         | 2   | 1 | S03 |
| .....uGaugacguggucuuuguccugau.....         | 1   | 1 | S03 |
| .....uaugacguggucuuugucUugau.....          | 1   | 1 | S03 |
| .....uaugacguggucuuuguccugauC.....         | 2   | 1 | S03 |
| .....uaugacguggucuuuguccugau.....          | 15  | 0 | S03 |
| .....uaugacguggucuuugAccugauuu.....        | 1   | 1 | S03 |
| .....uaugacguggucuuuguccugauCu.....        | 1   | 1 | S03 |
| .....uaugacguggucuuuguccugauuG.....        | 1   | 1 | S03 |
| .....uaugacguggucuuuguccugauuu.....        | 3   | 0 | S03 |
| .....uaugacguggucuuuguccugauuuuA.....      | 73  | 0 | S03 |
| .....uaugacguggucuuuguccugauuuuU.....      | 2   | 1 | S03 |
| .....uaugacguUgucuuuguccugauuuuA.....      | 1   | 1 | S03 |
| .....uaugacguggucuuuguccugauuuuG.....      | 3   | 1 | S03 |
| .....uaugGcguggucuuuguccugauuuuA.....      | 2   | 1 | S03 |
| .....CaugacguggucuuuguccugauuuuA.....      | 1   | 1 | S03 |
| .....uaugacgCggucuuuguccugauuuuA.....      | 1   | 1 | S03 |
| .....uaugacguggucuuCguccugauuuuau.....     | 1   | 1 | S03 |
| .....uaGgacguggucuuuguccugauuuuau.....     | 1   | 1 | S03 |
| .....uaugacguggucuuuguccugGuuuau.....      | 1   | 1 | S03 |
| .....uaugacUguggucuuuguccugauuuuau.....    | 1   | 1 | S03 |
| .....uaugacguggucuuuguccCgauuuuau.....     | 1   | 1 | S03 |
| .....uaugacguggucuuuguccugauuuuau.....     | 103 | 0 | S03 |
| .....uaugacguggucuuuguccugauuuuA.....      | 7   | 1 | S03 |
| .....uaugacguggucuuuguccugauuuuG.....      | 1   | 1 | S03 |
| .....uauCacguggucuuuguccugauuuuau.....     | 1   | 1 | S03 |
| .....uaugacguggucuuuguccugauuuuU.....      | 1   | 1 | S03 |
| .....uaugacguggucuuuguccugauuuuA.....      | 14  | 1 | S03 |
| .....uaugGcguggucuuuguccugauuuuau.....     | 2   | 1 | S03 |
| .....uaugacguggucCuguccugauuuuau.....      | 1   | 1 | S03 |
| .....uaugacguggucuuuguccugauuuuauG.....    | 41  | 0 | S03 |
| .....uaugacgCggucuuuguccugauuuuauG.....    | 1   | 1 | S03 |
| .....uaugacguggucuuuguccugauuuuauA.....    | 2   | 1 | S03 |





Star

Mature

|                                                                                                                 |    |   |     |
|-----------------------------------------------------------------------------------------------------------------|----|---|-----|
| ucuguccugcuaagcacguuugucuccggacaaaagauuacggucaagucugucuguccacuuuccuuguguuugcggggaauagacguggucuuuguccugauuuauaga |    |   |     |
| .....ugacguggucuuuguccugauuuauA.                                                                                | 2  | 1 | S03 |
| .....ugacguggucuuuguccugauuuauU.                                                                                | 2  | 1 | S03 |
| .....ugacguggucuuuguccugauuuauG.                                                                                | 10 | 0 | S03 |
| .....ugacguggucuuuguccugauuuauT.                                                                                | 1  | 1 | S03 |
| .....ugacguggucuuuguccugauuuauC.                                                                                | 1  | 1 | S03 |
| .....ugacguggucuuuguccugauuuauA.                                                                                | 1  | 1 | S03 |
| .....ugacguggucuuuguccugauuuauG.                                                                                | 1  | 1 | S03 |
| .....ugacguggucuuuguccugauuuauU.                                                                                | 42 | 0 | S03 |
| .....gacguggucuuuguccuga.                                                                                       | 1  | 0 | S03 |
| .....gacguggucuuuguccugau.                                                                                      | 1  | 0 | S03 |
| .....gacguggucuuuguccugauu.                                                                                     | 1  | 0 | S03 |
| .....gacguggucuuuguccugauC.                                                                                     | 1  | 1 | S03 |
| .....gacguggucuuuguccugauuuu.                                                                                   | 2  | 0 | S03 |
| .....gacgCggucuuuguccugauuuu.                                                                                   | 1  | 1 | S03 |
| .....gacguggucuuuguccugauuuuA.                                                                                  | 1  | 1 | S03 |
| .....gacguggucuuuguccugauuuuU.                                                                                  | 3  | 0 | S03 |
| .....gacguggucuuuguccugauuuuA.                                                                                  | 1  | 1 | S03 |
| .....gacguggucuuuguccCgauuuuau.                                                                                 | 1  | 1 | S03 |
| .....gacguggucuuuguccugauuuuauG.                                                                                | 1  | 0 | S03 |
| .....gacguggucuuugCccugauuuuauG.                                                                                | 1  | 1 | S03 |
| .....gacguggucuuuguccuAuuuuauaga                                                                                | 1  | 1 | S03 |
| .....gacguggucuuuguccugauuuuauaga                                                                               | 4  | 0 | S03 |
| .....acguggucuuuguccugauu.                                                                                      | 1  | 0 | S03 |
| .....acguggucuuuguccugauuuu.                                                                                    | 1  | 0 | S03 |
| .....acguggucuuuguccugauuuuU.                                                                                   | 1  | 0 | S03 |
| .....acUuggucuuuguccugauuuuau.                                                                                  | 1  | 1 | S03 |
| .....acguggucuuuguccugauuuuauG.                                                                                 | 2  | 0 | S03 |
| .....acguggucuuuguccugauuuuauaga                                                                                | 6  | 0 | S03 |
| .....cguggucuuuguccugauuuuauU.                                                                                  | 1  | 1 | S03 |
| .....cguggucuuuguccugauuuuauG.                                                                                  | 2  | 0 | S03 |
| .....guggucuuuguccugauuuuauaga                                                                                  | 2  | 0 | S03 |
| .....cuaagcacguuugucuccggga                                                                                     | 1  | 0 | S04 |
| .....uaagcacguuugucuccgggaca                                                                                    | 1  | 0 | S04 |
| .....guuugucuccgggacaaaa                                                                                        | 1  | 0 | S04 |
| .....auuacggucaagucugucuguu                                                                                     | 1  | 0 | S04 |
| .....ggucaagucugucuguuucca                                                                                      | 1  | 0 | S04 |
| .....ugCgucuguuuccacuuccuug                                                                                     | 1  | 1 | S04 |
| .....guuccacuuuccuuguguuugc                                                                                     | 1  | 0 | S04 |
| .....uuccacuuuccuuguguuugc                                                                                      | 2  | 0 | S04 |
| .....uccacuuuccuuguguuugU                                                                                       | 1  | 1 | S04 |
| .....cuuguguuugGggggaauagacgu                                                                                   | 1  | 1 | S04 |
| .....cuuguguuugcggggaauagacgu                                                                                   | 5  | 0 | S04 |
| .....cuuguguuugcgggCauagacgu                                                                                    | 1  | 1 | S04 |
| .....cuuguguuugcgggUauagacgu                                                                                    | 1  | 1 | S04 |
| .....cuuguguuugcggggauUagacgu                                                                                   | 1  | 1 | S04 |
| .....cuuguguuugcggggaauagacgA                                                                                   | 1  | 1 | S04 |
| .....uuguguuGcggggaauagacgug                                                                                    | 1  | 1 | S04 |
| .....guuugcggggaauagacguggu                                                                                     | 1  | 0 | S04 |
| .....gCauagacguggucuuuguccuga                                                                                   | 1  | 1 | S04 |
| .....gUauagacguggucuuuguccuga                                                                                   | 1  | 1 | S04 |
| .....ggauagacguggucuuuguccugaA                                                                                  | 1  | 1 | S04 |
| .....ggauagacguggucuuuguccugauu                                                                                 | 4  | 0 | S04 |
| .....ggauagacguggucuuuguccugauuG                                                                                | 1  | 1 | S04 |
| .....ggauagacguggucuuuguccugauuGa                                                                               | 1  | 1 | S04 |
| .....auagacguggucuuugucc                                                                                        | 3  | 0 | S04 |
| .....auagacguggucuuuguccuA                                                                                      | 4  | 1 | S04 |
| .....auGugacguggucuuuguccug                                                                                     | 1  | 1 | S04 |
| .....auagacguggucuuuguccug                                                                                      | 8  | 0 | S04 |
| .....aCaugacguggucuuuguccug                                                                                     | 1  | 1 | S04 |
| .....auagacguggucuuuguccugG                                                                                     | 1  | 1 | S04 |
| .....auaugUcguggucuuuguccuga                                                                                    | 1  | 1 | S04 |
| .....auagacguggGcuuguccuga                                                                                      | 1  | 1 | S04 |
| .....auagacguggucuuuguccuga                                                                                     | 23 | 0 | S04 |
| .....auagacguggucuuuguccugau                                                                                    | 21 | 0 | S04 |
| .....auagacguggucuuuguccugaA                                                                                    | 4  | 1 | S04 |
| .....auagacguggucuuuguccugaG                                                                                    | 1  | 1 | S04 |
| .....auagacguggucuuuguccugU                                                                                     | 1  | 1 | S04 |
| .....auagacguggucuuuguccugaC                                                                                    | 3  | 1 | S04 |
| .....auagacgGggucuuuguccugau                                                                                    | 1  | 1 | S04 |

Star

Mature

ucuguccugcuaagcacguuugucuccggacaaaagaauacgggucaagucugugucuguuccacuuuccuuguguuugcggggaugaacguggucuuuguccugauuuuga

|                                         |     |   |     |
|-----------------------------------------|-----|---|-----|
| .....auaugacguggucuuuguccugaCu.....     | 2   | 1 | S04 |
| .....auaugacguggucuuuguccugaU.....      | 1   | 1 | S04 |
| .....auaugaAguggucuuuguccugauu.....     | 1   | 1 | S04 |
| .....auauAacguggucuuuguccugauu.....     | 1   | 1 | S04 |
| .....Nuaugacguggucuuuguccugauu.....     | 2   | 1 | S04 |
| .....auaugacGguggucuuuguccugauu.....    | 2   | 1 | S04 |
| .....auaugaGguggucuuuguccugauu.....     | 1   | 1 | S04 |
| .....auaugacguggucuuuguccugaA.....      | 20  | 1 | S04 |
| .....auaugacguggucuuuguccugaGu.....     | 2   | 1 | S04 |
| .....auaugacguggucuuuguccugauu.....     | 422 | 0 | S04 |
| .....auaugUcuggucuuuguccugauu.....      | 2   | 1 | S04 |
| .....auaCgacguggucuuuguccugauu.....     | 1   | 1 | S04 |
| .....auaugacguggucuuuguccugGuu.....     | 2   | 1 | S04 |
| .....auaugacguggucuuugAccugauu.....     | 1   | 1 | S04 |
| .....aCaugacguggucuuuguccugauu.....     | 6   | 1 | S04 |
| .....auaugGcuggucuuuguccugauu.....      | 1   | 1 | S04 |
| .....aAaugacguggucuuuguccugauu.....     | 2   | 1 | S04 |
| .....auaugacguggucCguccugauu.....       | 1   | 1 | S04 |
| .....Uuaugacguggucuuuguccugauu.....     | 3   | 1 | S04 |
| .....Guaugacguggucuuuguccugauu.....     | 2   | 1 | S04 |
| .....auaugacguggucuuuguccUgauu.....     | 1   | 1 | S04 |
| .....auaugacguggucCuguccugauu.....      | 3   | 1 | S04 |
| .....auaugacAuggucuuuguccugauu.....     | 1   | 1 | S04 |
| .....auGugacguggucuuuguccugauu.....     | 3   | 1 | S04 |
| .....auaugacguggucuuuguccugaG.....      | 7   | 1 | S04 |
| .....auaugacguggucuuuguccugaC.....      | 29  | 1 | S04 |
| .....auUgacguggucuuuguccugauu.....      | 1   | 1 | S04 |
| .....auaugacguggucuuuguccugaU.....      | 1   | 1 | S04 |
| .....auaugacguggucuuuguccugauuu.....    | 5   | 0 | S04 |
| .....auaugacguggucuuuguccugauuA.....    | 3   | 1 | S04 |
| .....auaugacguggucCguccugauuu.....      | 1   | 1 | S04 |
| .....auaugacguggucuuuguccugGuuua.....   | 2   | 1 | S04 |
| .....auauAacguggucuuuguccugauuuA.....   | 1   | 1 | S04 |
| .....auaugacguggucuuuguccugauuA.....    | 1   | 1 | S04 |
| .....auaugacguggucuuuguccugauuuA.....   | 19  | 0 | S04 |
| .....auaugacguggucuuuguccugauuuau.....  | 10  | 0 | S04 |
| .....auaugacguggucuuuguccugauuuA.....   | 1   | 1 | S04 |
| .....auaugacguggucuuuguccugauuuuA.....  | 1   | 1 | S04 |
| .....auaugacguggucuuuguccugauuuU.....   | 1   | 1 | S04 |
| .....auaugacguggucuuuguccugauuuauA..... | 5   | 1 | S04 |
| .....auaugacguggucuuuguccugauuuauG..... | 18  | 0 | S04 |
| .....auaugacguggucuuuguccugauuuauU..... | 1   | 1 | S04 |
| .....auGugacguggucuuuguccugauuuauG..... | 1   | 1 | S04 |
| .....auaugacguggucuuuguccugauuuauG..... | 1   | 1 | S04 |
| .....auaugacguggucuuuguccugauuuauG..... | 40  | 0 | S04 |
| .....auaugacguggucuuAuccugauuuauG.....  | 1   | 1 | S04 |
| .....auaugacguggucuuuguccugauuuauG..... | 1   | 1 | S04 |
| .....auaugacguggucuuuguccugauuuauG..... | 1   | 1 | S04 |
| .....uauaugacguggucuuuguccA.....        | 2   | 1 | S04 |
| .....uauaugacguggucuuugucc.....         | 4   | 0 | S04 |
| .....uauaugacguggucuuuguccU.....        | 2   | 1 | S04 |
| .....uauaugacguggucuuuguccC.....        | 1   | 1 | S04 |
| .....uauaugacguggucuuuguccug.....       | 7   | 0 | S04 |
| .....uauaugacguggucuuAuccuga.....       | 1   | 1 | S04 |
| .....Caugacguggucuuuguccuga.....        | 1   | 1 | S04 |
| .....uauaugacguggucuuuguAuccuga.....    | 1   | 1 | S04 |
| .....uauaugacguggucuuuguccuga.....      | 34  | 0 | S04 |
| .....uauaugacguggucuuuguccugG.....      | 3   | 1 | S04 |
| .....uauaugacguggucuuuguccugaA.....     | 1   | 1 | S04 |
| .....Gaugacguggucuuuguccugau.....       | 1   | 1 | S04 |
| .....Nuaugacguggucuuuguccugau.....      | 1   | 1 | S04 |
| .....uauugGcuggucuuuguccugau.....       | 2   | 1 | S04 |
| .....uauaugacguggucuuuguccCgau.....     | 1   | 1 | S04 |
| .....uauaugacguggucuuuguccugau.....     | 36  | 0 | S04 |
| .....uauaugacguggucuuuguccugaC.....     | 1   | 1 | S04 |
| .....uGugacguggucuuuguccugauu.....      | 1   | 1 | S04 |
| .....uauaugacguggucuuuguccugauu.....    | 40  | 0 | S04 |
| .....uauaugacguggucAuggucugauu.....     | 1   | 1 | S04 |
| .....uauaugacguggucuuuguccugauG.....    | 2   | 1 | S04 |
| .....uauaugacguggucuuuguccugaU.....     | 2   | 1 | S04 |

Star

Mature

ucuguccugcuaagcacguuugucuccggacaaaagauuacggucaagucugugucuguuccacuuuccuuguguuugcggggauaugacguggucuuuguccugauuuauaga

|                                         |     |   |     |
|-----------------------------------------|-----|---|-----|
| .....uauagacguggucuuuguccugauA.....     | 11  | 1 | S04 |
| .....uauagacguggucuuuguccCgau.....      | 1   | 1 | S04 |
| .....uaugacguggucuuugAccugauuu.....     | 4   | 1 | S04 |
| .....uauagacguggucuuuguccugauuu.....    | 14  | 0 | S04 |
| .....uauagacguggucuuuguccugauuG.....    | 1   | 1 | S04 |
| .....CaugacguggucuuuguccugauuuA.....    | 2   | 1 | S04 |
| .....uauagacguggucuuuguccugauuCa.....   | 1   | 1 | S04 |
| .....GaugacguggucuuuguccugauuuA.....    | 1   | 1 | S04 |
| .....uauagacguggucuuuguccugauuuU.....   | 2   | 1 | S04 |
| .....uauagacguggucuuuguccugauuuA.....   | 119 | 0 | S04 |
| .....uauagacguggucuuuguccugauuGa.....   | 2   | 1 | S04 |
| .....uauagacguggucuuuguccugauuuA.....   | 1   | 1 | S04 |
| .....uauUacguggucuuuguccugauuuau.....   | 1   | 1 | S04 |
| .....Caugacguggucuuuguccugauuuau.....   | 1   | 1 | S04 |
| .....Aaugacguggucuuuguccugauuuau.....   | 1   | 1 | S04 |
| .....uauagacguggucuuuguccugauuuau.....  | 1   | 1 | S04 |
| .....uauagacguggucuuuguccugauuuGu.....  | 1   | 1 | S04 |
| .....uauagacguggucuuuguccugauuuA.....   | 17  | 1 | S04 |
| .....uauagacguggucuuuguccugauuuau.....  | 150 | 0 | S04 |
| .....uauagacguggucCuguccugauuuau.....   | 1   | 1 | S04 |
| .....uauagacgugguUuuguccugauuuau.....   | 1   | 1 | S04 |
| .....uauagacguggucuuuguccugauuuA.....   | 4   | 1 | S04 |
| .....uauagacguggucCuguccugauuuau.....   | 1   | 1 | S04 |
| .....uauagacguggucuuuguccugauuuA.....   | 12  | 1 | S04 |
| .....uauagacguggucuuuguccugauuuauU..... | 4   | 1 | S04 |
| .....uauagacguggucuuuguccugauuuauG..... | 64  | 0 | S04 |
| .....uauagacguggucuuuguccugauCuaug..... | 1   | 1 | S04 |
| .....uauagacguggucuuuguccugauuuA.....   | 1   | 1 | S04 |
| .....uauagacguggucuuuguccugauuuauA..... | 7   | 1 | S04 |
| .....uaCgacguggucuuuguccugauuuauG.....  | 1   | 1 | S04 |
| .....GaugacguggucuuuguccugauuuauG.....  | 1   | 1 | S04 |
| .....uauagacgCggucuuuguccugauuuauA..... | 1   | 1 | S04 |
| .....uauagacguggucuuuguccugauuuauA..... | 1   | 1 | S04 |
| .....uauagacguggucuuuguccugauuuauG..... | 1   | 1 | S04 |
| .....uauagacguggucuuuguccugauuuauG..... | 1   | 1 | S04 |
| .....uaGgacguggucuuuguccugauuuauA.....  | 1   | 1 | S04 |
| .....uauagacguggucuuuguccugauuuauA..... | 1   | 1 | S04 |
| .....uGugacguggucuuuguccugauuuauA.....  | 1   | 1 | S04 |
| .....uauagacguggucuuuguccugauuuauA..... | 1   | 1 | S04 |
| .....uauagacguggucuuuguccugauuuauG..... | 6   | 1 | S04 |
| .....uauagacguggucuuuguccugauuuA.....   | 1   | 1 | S04 |
| .....uauagacguggucuuuguccugauuuauA..... | 1   | 1 | S04 |
| .....uauagacguggucuuuguccugauuuauA..... | 1   | 1 | S04 |
| .....uauagacguggucuuuguccugauuuauA..... | 1   | 1 | S04 |
| .....uauagacguggucuuuguccugauuuauA..... | 216 | 0 | S04 |
| .....NaugacguggucuuuguccugauuuauA.....  | 1   | 1 | S04 |
| .....uauagacguggucuuuguccugauuuauG..... | 9   | 1 | S04 |
| .....uauagacguggucuuuguccugauuuauA..... | 1   | 1 | S04 |
| .....uauagCguggucuuuguccugauuuauA.....  | 2   | 1 | S04 |
| .....augacguggucuuuguccug.....          | 3   | 0 | S04 |
| .....augacguggucuuuguccuga.....         | 7   | 0 | S04 |
| .....augacguggucuuuguccugaC.....        | 1   | 1 | S04 |
| .....augacguggucuuuguccugaA.....        | 1   | 1 | S04 |
| .....augacgugAucuuuguccugau.....        | 1   | 1 | S04 |
| .....augacguggucuuuguccugau.....        | 7   | 0 | S04 |
| .....augacguggucuuuguccugau.....        | 27  | 0 | S04 |
| .....augacguggucAuguccugau.....         | 1   | 1 | S04 |
| .....augacguggucuuuguccugaC.....        | 4   | 1 | S04 |
| .....augacgCggucuuuguccugau.....        | 1   | 1 | S04 |
| .....augacguggucuuuguccugauuu.....      | 3   | 0 | S04 |
| .....augacguggucuuuguccugauuu.....      | 1   | 1 | S04 |
| .....augacguggucuuuguccugauA.....       | 1   | 1 | S04 |
| .....augacgugguUuuguccugauuuA.....      | 1   | 1 | S04 |
| .....augacguggucuuuguccugauuuA.....     | 54  | 0 | S04 |
| .....augacguggucuuuguccugauuuA.....     | 7   | 1 | S04 |
| .....aCgacguggucuuuguccugauuuau.....    | 1   | 1 | S04 |
| .....Nugacguggucuuuguccugauuuau.....    | 1   | 1 | S04 |

Star

Mature

|                                                                                                                  |     |   |     |
|------------------------------------------------------------------------------------------------------------------|-----|---|-----|
| ucuguccugcuaagcacguuugucuccggacaaaagauuacgggucaagucugucugucuccacuuuccuuguguuugcggggauaugacguggucuuuguccugauuuuga |     |   |     |
| .....augacguggucuuuguccugauuuuA                                                                                  | 1   | 1 | S04 |
| .....augGcguggucuuuguccugauuuuA                                                                                  | 1   | 1 | S04 |
| .....GugacguggucuuuguccugauuuuA                                                                                  | 2   | 1 | S04 |
| .....augacguggucuuuguccugauuuuA                                                                                  | 1   | 1 | S04 |
| .....augacguggucuuuguccugauuuuA                                                                                  | 9   | 1 | S04 |
| .....augacguggucuuuguccugauuuuA                                                                                  | 90  | 0 | S04 |
| .....augacguggucuuuguccugauuuuA                                                                                  | 1   | 1 | S04 |
| .....augacAuggucuuuguccugauuuuA                                                                                  | 1   | 1 | S04 |
| .....augacguggucuuuguccugauuuuA                                                                                  | 1   | 1 | S04 |
| .....augacguggucuuuguccugauuuuA                                                                                  | 8   | 1 | S04 |
| .....augacCuggucuuuguccugauuuuA                                                                                  | 1   | 1 | S04 |
| .....augacguggucuuuguccugauuuuA                                                                                  | 1   | 1 | S04 |
| .....aGgacguggucuuuguccugauuuuA                                                                                  | 1   | 1 | S04 |
| .....augacguggucuuuguccugauuuuA                                                                                  | 51  | 0 | S04 |
| .....augacguggucuuuguccugauuuuA                                                                                  | 3   | 1 | S04 |
| .....aGgacguggucuuuguccugauuuuA                                                                                  | 1   | 1 | S04 |
| .....augacgCggucuuuguccugauuuuA                                                                                  | 2   | 1 | S04 |
| .....augacguggucuuuguccugauuuuA                                                                                  | 1   | 1 | S04 |
| .....augacguggucuuuguccugauuuuA                                                                                  | 114 | 0 | S04 |
| .....aCgacguggucuuuguccugauuuuA                                                                                  | 1   | 1 | S04 |
| .....augacguggucuuuguccugauuuuA                                                                                  | 2   | 1 | S04 |
| .....augacguggucuuuguccugauuuuA                                                                                  | 1   | 1 | S04 |
| .....augacguggucuuuguccugauuuuA                                                                                  | 1   | 1 | S04 |
| .....NugacguggucuuuguccugauuuuA                                                                                  | 1   | 1 | S04 |
| .....augacguggucuuuguccugauuuuA                                                                                  | 6   | 1 | S04 |
| .....augGcguggucuuuguccugauuuuA                                                                                  | 1   | 1 | S04 |
| .....augacguggucuuuguccugauuuuA                                                                                  | 1   | 1 | S04 |
| .....augacguggucuuuguccugauuuuA                                                                                  | 1   | 1 | S04 |
| .....augacAuggucuuuguccugauuuuA                                                                                  | 1   | 1 | S04 |
| .....ugacguggucuuuguccug                                                                                         | 4   | 0 | S04 |
| .....ugacguggucuuuguccuga                                                                                        | 6   | 0 | S04 |
| .....ugacguggucuuuguccugG                                                                                        | 1   | 1 | S04 |
| .....ugacguggucuuuguccugaC                                                                                       | 1   | 1 | S04 |
| .....ugacguggucuuuguccugau                                                                                       | 3   | 0 | S04 |
| .....ugacguggucuuuguccugaG                                                                                       | 1   | 1 | S04 |
| .....ugacguggucuuuguccugaA                                                                                       | 1   | 1 | S04 |
| .....ugacguggucuuuguccugauu                                                                                      | 1   | 1 | S04 |
| .....ugacguggucuuuguccugauu                                                                                      | 33  | 0 | S04 |
| .....ugacguggucuuuguccugauA                                                                                      | 2   | 1 | S04 |
| .....ugaUguggucuuuguccugauu                                                                                      | 1   | 1 | S04 |
| .....ugacguggucuuuguccugauC                                                                                      | 3   | 1 | S04 |
| .....ugacguggucuuuguccugauuu                                                                                     | 4   | 0 | S04 |
| .....ugacguggucuuuguccugauuA                                                                                     | 1   | 1 | S04 |
| .....ugacguggucuuuguccugauuCa                                                                                    | 1   | 1 | S04 |
| .....ugacgCggucuuuguccugauuuuA                                                                                   | 1   | 1 | S04 |
| .....ugacguggucuuuguccugauuuuA                                                                                   | 1   | 1 | S04 |
| .....ugacguggucuuuguccugauuuuA                                                                                   | 18  | 0 | S04 |
| .....ugacguggucuuuguccugauuuuA                                                                                   | 7   | 1 | S04 |
| .....ugacguggucuuuguccugauuuuA                                                                                   | 1   | 1 | S04 |
| .....ugacguggucuuuguccugauuuuA                                                                                   | 60  | 0 | S04 |
| .....ugacguggucuuuguccugauuuuA                                                                                   | 5   | 1 | S04 |
| .....ugacguggucuuuguccugauuuuG                                                                                   | 1   | 1 | S04 |
| .....ugacguggucuuuguccugauuuuA                                                                                   | 1   | 1 | S04 |
| .....ugacguggucuuuguccugauuuuA                                                                                   | 1   | 1 | S04 |
| .....ugacguggucuuuguccugauuuuA                                                                                   | 1   | 1 | S04 |
| .....ugacguggucuuuguccugauuuuA                                                                                   | 1   | 1 | S04 |
| .....ugacguggucuuuguccugauuuuA                                                                                   | 18  | 0 | S04 |
| .....ugacguggucuuuguccugauuuuA                                                                                   | 1   | 1 | S04 |
| .....ugacguggucuuuguccugauuuuA                                                                                   | 1   | 1 | S04 |
| .....ugacguggucuuuguccugauuuuA                                                                                   | 1   | 1 | S04 |
| .....ugacguggucuuuguccugauuuuA                                                                                   | 2   | 1 | S04 |
| .....ugacguggucuuuguccugauuuuA                                                                                   | 3   | 1 | S04 |
| .....ugacguggucuuuguccugauuuuA                                                                                   | 1   | 1 | S04 |
| .....GgacguggucuuuguccugauuuuA                                                                                   | 1   | 1 | S04 |
| .....ugacguggucuuuguccugauuuuA                                                                                   | 1   | 1 | S04 |
| .....ugacguggucuuuguccugauuuuG                                                                                   | 1   | 1 | S04 |
| .....ugacguggucuuuguccugauuuuA                                                                                   | 1   | 1 | S04 |
| .....ugacguggucuuuguccugauuuuA                                                                                   | 56  | 0 | S04 |
| .....ugacguggucuuuguccugauuuuA                                                                                   | 1   | 1 | S04 |
| .....gacguggucuuuguccuga                                                                                         | 1   | 0 | S04 |

Star

Mature

|                                                                   |                                               |    |   |     |
|-------------------------------------------------------------------|-----------------------------------------------|----|---|-----|
| ucuguccugcuaagcacgguugucuccggacaaaagauuacgggcaagucugugucguuuccacu | uuccuuguguuugcggggauaugacguggcuuguccugauuuuga |    |   |     |
| .....                                                             | .gacguggcuuguccugau.....                      | 4  | 0 | S04 |
| .....                                                             | .gacguggcuuguccugauu.....                     | 3  | 0 | S04 |
| .....                                                             | .gacguggcuuguccCgauu.....                     | 1  | 1 | S04 |
| .....                                                             | .UacguggcuuguccugauuuA..                      | 1  | 1 | S04 |
| .....                                                             | .gacguggcuuguccugauuuA..                      | 7  | 0 | S04 |
| .....                                                             | .gacguggcuuguccugauuuA..                      | 1  | 1 | S04 |
| .....                                                             | .gacgugAucuguccugauuuA..                      | 1  | 1 | S04 |
| .....                                                             | .gacguggcuuguccugauuuA..                      | 3  | 1 | S04 |
| .....                                                             | .gacguggcuuguccugauuuau..                     | 2  | 0 | S04 |
| .....                                                             | .gacguggcuugGccugauuuauG.                     | 2  | 1 | S04 |
| .....                                                             | .gacguggcuuguccugauuuauU.                     | 1  | 1 | S04 |
| .....                                                             | .gacguggcuuguccugauuuauA.                     | 2  | 1 | S04 |
| .....                                                             | .UacguggcuuguccugauuuauG.                     | 1  | 1 | S04 |
| .....                                                             | .gacguggcuuguccugauuuauG.                     | 2  | 0 | S04 |
| .....                                                             | .gGcuguggcuuguccugauuuauG.                    | 1  | 1 | S04 |
| .....                                                             | .gacguggcuuguccugauuuauG.                     | 11 | 0 | S04 |
| .....                                                             | .gacguggcuuUuccugauuuauG.                     | 1  | 1 | S04 |
| .....                                                             | .acguggcuuguccugau.....                       | 1  | 0 | S04 |
| .....                                                             | .acguggcuuguccugauC.....                      | 1  | 1 | S04 |
| .....                                                             | .acguggcuuguccugauuu.....                     | 1  | 0 | S04 |
| .....                                                             | .acguggcuuguccugauuuau..                      | 1  | 0 | S04 |
| .....                                                             | .acguggcuugGccugauuuauG.                      | 1  | 1 | S04 |
| .....                                                             | .acguggcuuguccugauuuauG.                      | 3  | 0 | S04 |
| .....                                                             | .acguggcuuguccCgauuuauG.                      | 1  | 1 | S04 |
| .....                                                             | .acguggcuugGccugauuuauG.                      | 1  | 1 | S04 |
| .....                                                             | .acguggcuuguccugauuuauG.                      | 3  | 0 | S04 |
| .....                                                             | .acguggcuuguccugauuuauG.                      | 1  | 1 | S04 |
| .....                                                             | .acguggcuuguccugauuuauCg.                     | 1  | 1 | S04 |
| .....                                                             | .cguggcuuguccugauu.....                       | 1  | 0 | S04 |
| .....                                                             | .cguggcuuguccugauuuau..                       | 1  | 0 | S04 |
| .....                                                             | .cguggcuuguccugauuuauG.                       | 3  | 0 | S04 |
| .....                                                             | .guggcuuguccugauuuauC..                       | 1  | 1 | S04 |
| .....                                                             | .guggcuuguccugauuuauG.                        | 1  | 1 | S04 |
| .....                                                             | .guggcuuguccugauuuauG.                        | 2  | 0 | S04 |

Provisional ID : chrAnn\_random\_3081079  
 Score total : 1.6  
 Score for star read(s) : -1.3  
 Score for read counts : 0  
 Score for mfe : 2.9  
 Score for randfold : 0  
 Score for cons. seed :  
 Total read count : 131  
 Mature read count : 131  
 Loop read count : 0  
 Star read count : 0

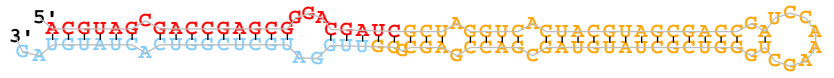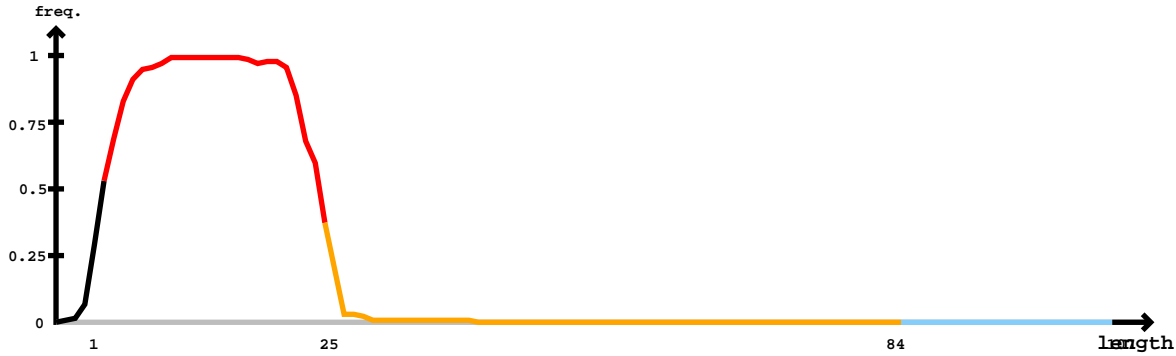

**Mature**

**Star**

| 5' -                                                                                                                | reads | exp | sample |
|---------------------------------------------------------------------------------------------------------------------|-------|-----|--------|
| gcuacguagcgaccgagcgggacgaucgcuagggucacuaacguagcgaccgaucacaaagcugggucgcuauuguagcgaccgagcgggUUGGAUGCUCGGUACUAUGUAGCGA | 1     | 0   | S03    |
| gcuaacUuagcgaccgagcgcg.....                                                                                         | 1     | 1   | S03    |
| .cuacguagcgaccgagcgcg.....                                                                                          | 1     | 0   | S03    |
| .cuacguagcgaccgagcgggac.....                                                                                        | 3     | 0   | S03    |
| .cuacguagcgaccgagcgggacg.....                                                                                       | 2     | 0   | S03    |
| ..uacguagcgaccgagcgggC.....                                                                                         | 1     | 1   | S03    |
| ..uacguagcgaccgagcgggac.....                                                                                        | 3     | 0   | S03    |
| ..uacguagcgaccgagcgggacg.....                                                                                       | 8     | 0   | S03    |
| ..uacguagcgaccgUgcgggacg.....                                                                                       | 1     | 1   | S03    |
| ..uacguagcgaccgagcgggacgaC.....                                                                                     | 2     | 1   | S03    |
| ..uaUguagcgaccgagcgggacgau.....                                                                                     | 2     | 1   | S03    |
| ..uacguagcgaccgagcgggacgau.....                                                                                     | 9     | 0   | S03    |
| ..uacUuagcgaccgagcgggacgau.....                                                                                     | 1     | 1   | S03    |
| ...acguagcgaccgagcgggac.....                                                                                        | 2     | 0   | S03    |
| ...acguagcgaccgagcgggac.....                                                                                        | 2     | 0   | S03    |
| ...acguagcgaccgagcgggacg.....                                                                                       | 2     | 0   | S03    |
| ...acguagcgaccgagcgggacga.....                                                                                      | 4     | 0   | S03    |
| ...acguagcgaccgagcgggacgC.....                                                                                      | 1     | 1   | S03    |
| ...acguagcgaccgagcgggacgau.....                                                                                     | 1     | 0   | S03    |
| ...acguagcgaccgagcgggacgauC.....                                                                                    | 10    | 0   | S03    |
| ...acUuagcgaccgagcgggacgauc.....                                                                                    | 3     | 1   | S03    |
| ...acguagcgaccgagcgggacgauG.....                                                                                    | 1     | 1   | S03    |
| ...cguagcgaccgagcgggac.....                                                                                         | 3     | 0   | S03    |
| ...cguagcgaccgagcgggacg.....                                                                                        | 2     | 0   | S03    |
| ...cguagcgaccgagcgggacC.....                                                                                        | 1     | 1   | S03    |
| ...cguagcgaccgagcgggacga.....                                                                                       | 2     | 0   | S03    |
| ...cguagcgaccgagcgggacgau.....                                                                                      | 5     | 0   | S03    |
| ...cUuagcgaccgagcgggacgau.....                                                                                      | 1     | 1   | S03    |
| ...cguagcgaccgagcgggacgaC.....                                                                                      | 1     | 1   | S03    |
| ...cguagcgaccgagcgggacgauA.....                                                                                     | 1     | 1   | S03    |
| ...cguagcgaccgagcgggacgauC.....                                                                                     | 1     | 0   | S03    |
| ...cUuagcgaccgagcgggacgauCg.....                                                                                    | 1     | 1   | S03    |
| ...guagcgaccgagcgggac.....                                                                                          | 1     | 0   | S03    |
| ...guagcgaccgagcgggacg.....                                                                                         | 2     | 0   | S03    |

Mature

Star

|                                                                                                                                                                                        |   |   |     |
|----------------------------------------------------------------------------------------------------------------------------------------------------------------------------------------|---|---|-----|
| gcuacg <u>uagcgcgacgagcgggacg</u> aucgcuaggu <u>acac</u> uacg <u>uagcgcgacgacg</u> auc <u>caaagcuggggucg</u> ua <u>ug</u> uagcgcgacgagcggg <u>uuggaugcucggucac</u> ua <u>ug</u> uagcga |   |   |     |
| . . . . .Nuagcgcgacgagcgggacg . . . . .                                                                                                                                                | 1 | 1 | S03 |
| . . . . .guagcgcgacgagcgggacgau . . . . .                                                                                                                                              | 2 | 0 | S03 |
| . . . . .guagcgcgacgagcgggacCau . . . . .                                                                                                                                              | 1 | 1 | S03 |
| . . . . .guagcgcgacUgagcgggacg <u>auc</u> . . . . .                                                                                                                                    | 1 | 1 | S03 |
| . . . . .guagcgcgacgagcgggacg <u>auc</u> . . . . .                                                                                                                                     | 4 | 0 | S03 |
| . . . . .Uuagcgcgacgagcgggacg <u>auc</u> . . . . .                                                                                                                                     | 4 | 1 | S03 |
| . . . . .Uuagcgcgacgagcgggacg <u>aucg</u> . . . . .                                                                                                                                    | 2 | 1 | S03 |
| . . . . .guagcgcgacgagcgggacg <u>aucg</u> . . . . .                                                                                                                                    | 1 | 0 | S03 |
| . . . . .uagcgcgacgagcgggacg . . . . .                                                                                                                                                 | 2 | 0 | S03 |
| . . . . .uagcgcgacgagcgggacgga . . . . .                                                                                                                                               | 1 | 0 | S03 |
| . . . . .uagcgcgacgagcgggacgC . . . . .                                                                                                                                                | 1 | 1 | S03 |
| . . . . .uagcgcgacgagcgggacg <u>auc</u> . . . . .                                                                                                                                      | 4 | 0 | S03 |
| . . . . .uagcgcgacgagcgggacg <u>aucG</u> . . . . .                                                                                                                                     | 1 | 1 | S03 |
| . . . . .uagcgcgacgagcgggacg <u>aucg</u> . . . . .                                                                                                                                     | 2 | 0 | S03 |
| . . . . .agcgcgacgagcgggacg <u>auc</u> . . . . .                                                                                                                                       | 2 | 0 | S03 |
| . . . . .gcgacgagcgggacg <u>auc</u> . . . . .                                                                                                                                          | 1 | 0 | S03 |
| . . . . .cgacgagcgggacg <u>aucgcu</u> . . . . .                                                                                                                                        | 1 | 0 | S03 |
| . . . . .cgacgagcgggacg <u>aucgcuG</u> . . . . .                                                                                                                                       | 1 | 1 | S03 |
| . . . . .gacgagcgggacg <u>aucg</u> . . . . .                                                                                                                                           | 2 | 0 | S03 |
| . . . . .gacgagcgggacg <u>aucAcua</u> . . . . .                                                                                                                                        | 1 | 1 | S03 |
| . . . . .cuacg <u>uagcgcgacgagcgggacg</u> . . . . .                                                                                                                                    | 1 | 0 | S04 |
| . . . . .uacg <u>uagcgcgacgagcgggacg</u> . . . . .                                                                                                                                     | 1 | 0 | S04 |
| . . . . .uacUuagcgcgacgagcgggacgga . . . . .                                                                                                                                           | 1 | 1 | S04 |
| . . . . .uaUguagcgcgacgagcgggacgau . . . . .                                                                                                                                           | 1 | 1 | S04 |
| . . . . .acguagcgcgacgagcgggac . . . . .                                                                                                                                               | 1 | 0 | S04 |
| . . . . .acguagcgcgacgagAgggac . . . . .                                                                                                                                               | 1 | 1 | S04 |
| . . . . .acguagcgcgacgagcgggacg <u>auc</u> . . . . .                                                                                                                                   | 2 | 0 | S04 |
| . . . . .aUguagcgcgacgagcgggacg <u>auc</u> . . . . .                                                                                                                                   | 1 | 1 | S04 |
| . . . . .acUuagcgcgacgagcgggacg <u>auc</u> . . . . .                                                                                                                                   | 1 | 1 | S04 |
| . . . . .cguagcgcgacgagcgggacga . . . . .                                                                                                                                              | 1 | 0 | S04 |
| . . . . .cguagcgcgacgagcgggacg <u>auc</u> . . . . .                                                                                                                                    | 1 | 0 | S04 |
| . . . . .cUuagcgcgacgagcgggacg <u>auc</u> . . . . .                                                                                                                                    | 1 | 1 | S04 |
| . . . . .agcgcgacgagcgggacg <u>auc</u> . . . . .                                                                                                                                       | 2 | 0 | S04 |
| . . . . .agcgcgacgagcgggacg <u>aucU</u> . . . . .                                                                                                                                      | 1 | 1 | S04 |
| . . . . .gacg <u>aucgcuagguacac</u> uacg . . . . .                                                                                                                                     | 1 | 0 | S04 |

Provisional ID : chrAnn\_random\_3083516  
 Score total : 0.2  
 Score for star read(s) : -1.3  
 Score for read counts : 0  
 Score for mfe : 1.5  
 Score for randfold : 0  
 Score for cons. seed :  
 Total read count : 57  
 Mature read count : 53  
 Loop read count : 4  
 Star read count : 0

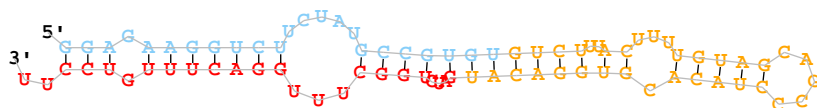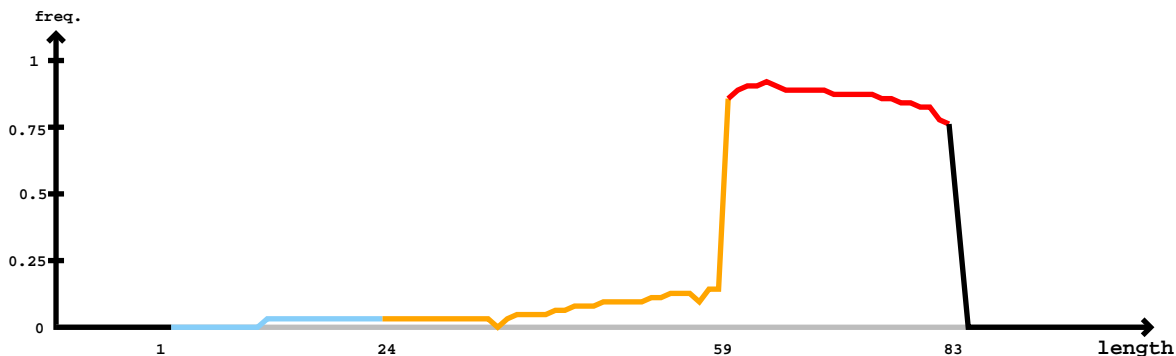

Star

Mature

| 5'                                                                                                              | reads | mm | sample |
|-----------------------------------------------------------------------------------------------------------------|-------|----|--------|
| gguggaggaa ggagaaggguucuaugccgugugucuuuacuuuuguagcagccuacacguggacau gaucuggcuuuggacuuguccuuuucuccuuuuggguuucuaa | 1     | 0  | S03    |
| .....uagcagccuacacguggacau.....                                                                                 | 1     | 1  | S03    |
| .....ccuacacguggacau gaucG.....                                                                                 | 1     | 1  | S03    |
| .....guggacau gaucuggcuuuggacG.....                                                                             | 1     | 1  | S03    |
| .....augaucuggcuuuggacuugucU.....                                                                               | 1     | 0  | S03    |
| .....augaucuggcuuuggacuugucc.....                                                                               | 1     | 0  | S03    |
| .....gaucuggcuuuggacuuguccu.....                                                                                | 1     | 1  | S03    |
| .....gaucCggcuuuggacuuguccuu.....                                                                               | 1     | 1  | S03    |
| .....gaucuggcuuuggacuuguccuu.....                                                                               | 22    | 0  | S03    |
| .....aucuggcuuuggacuuguccuu.....                                                                                | 1     | 0  | S03    |
| .....uucuaugccgugugucuuuacuuu.....                                                                              | 2     | 0  | S04    |
| .....guagcagccuacacgugga.....                                                                                   | 2     | 0  | S04    |
| .....agccuacacguggacau gaucug.....                                                                              | 1     | 0  | S04    |
| .....uacacguggacau gaucuggcuu.....                                                                              | 1     | 0  | S04    |
| .....ggacau gaucuggcuuuggacuu.....                                                                              | 1     | 1  | S04    |
| .....augaucuggcuuuggacuugucA.....                                                                               | 1     | 0  | S04    |
| .....gaucuggcuuuggacuugucU.....                                                                                 | 1     | 1  | S04    |
| .....gaucuggcuuuggacuuguccu.....                                                                                | 2     | 1  | S04    |
| .....gaucuggcuuuggacuuguccuu.....                                                                               | 15    | 0  | S04    |
| .....gaucuggcuuuggacuuguccuu.....                                                                               | 1     | 1  | S04    |
| .....gaucuggcuuuggacuuguccCu.....                                                                               | 1     | 1  | S04    |
| .....gaucuggcuuuggacuuguccAuu.....                                                                              | 1     | 1  | S04    |
| .....aucuggcuuuggacuuguccu.....                                                                                 | 1     | 0  | S04    |
| .....ucuggcuuuggacuuguccuu.....                                                                                 | 1     | 0  | S04    |
| .....uggcuuuggacuugCccuu.....                                                                                   | 1     | 1  | S04    |



Provisional ID : chrAnn\_random\_3091761  
 Score total : 0.6  
 Score for star read(s) : -1.3  
 Score for read counts : 0  
 Score for mfe : 1.9  
 Score for randfold : 0  
 Score for cons. seed :  
 Total read count : 63  
 Mature read count : 63  
 Loop read count : 0  
 Star read count : 0

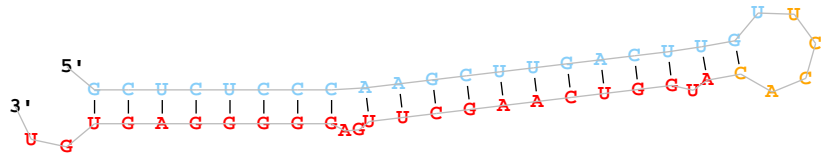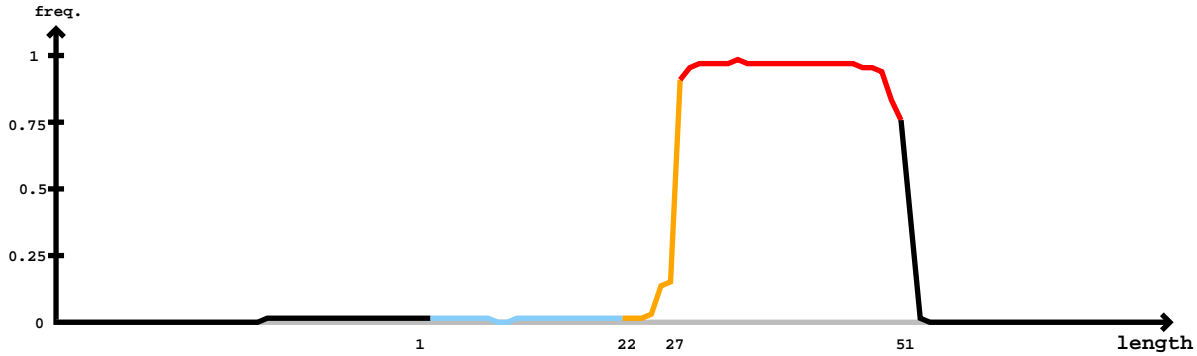

| 5'   | Star                                                                                                                | Mature                             | -3'                      | exp | reads | mm | sample |
|------|---------------------------------------------------------------------------------------------------------------------|------------------------------------|--------------------------|-----|-------|----|--------|
| 5' - | aaaugcugcaaggggucugauggugugaucaugaagcugcucuccaagcuugaucuuuccac                                                      | auggucaagcuugaggggagugu            | ugagaagacucaaugaucacaaag |     |       |    |        |
|      | .....((((((((((((((((((((((((((((((((((((((((((((((((((((((((((((.....))))))))))))))))))))))))))))))))))))))))..... |                                    |                          |     | 1     | 0  | S03    |
|      | .....ggugugaucaugaagcugcucc.....                                                                                    | cauggucaagcuugaggggagug.....       |                          |     | 1     | 0  | S03    |
|      |                                                                                                                     | auggucaagcuugaggggagugA.....       |                          |     | 1     | 1  | S03    |
|      |                                                                                                                     | auggucaagcuugaggggagug.....        |                          |     | 1     | 0  | S03    |
|      |                                                                                                                     | auggucaagcuugaggggagugC.....       |                          |     | 1     | 1  | S03    |
|      |                                                                                                                     | auggucaagcuugGgggggagugu.....      |                          |     | 2     | 1  | S03    |
|      |                                                                                                                     | auggucaagcuugaggggagugu.....       |                          |     | 11    | 0  | S03    |
|      |                                                                                                                     | uggucaagcuugaggggg.....            |                          |     | 1     | 0  | S03    |
|      |                                                                                                                     | .....agcuugacuuguuccaagguca.....   |                          |     | 1     | 0  | S04    |
|      |                                                                                                                     | .....cacauggucaagcuugaggggag.....  |                          |     | 1     | 0  | S04    |
|      |                                                                                                                     | .....acauUgucaagcuugaggggagug..... |                          |     | 1     | 1  | S04    |
|      |                                                                                                                     | .....acauggucaagcuugaggggagug..... |                          |     | 6     | 0  | S04    |
|      |                                                                                                                     | .....auggucaagcuugaggggagug.....   |                          |     | 2     | 0  | S04    |
|      |                                                                                                                     | .....auggucaagcuugaggggagugA.....  |                          |     | 1     | 1  | S04    |
|      |                                                                                                                     | .....auggucaagcuugGgggggagugu..... |                          |     | 2     | 1  | S04    |
|      |                                                                                                                     | .....auggucaagcuugaggggagugG.....  |                          |     | 3     | 1  | S04    |
|      |                                                                                                                     | .....auggucaagcuugaggggagugC.....  |                          |     | 1     | 1  | S04    |
|      |                                                                                                                     | .....auggucaagcuugaggggagugu.....  |                          |     | 25    | 0  | S04    |
|      |                                                                                                                     | .....uggucaagcuugaggggagugA.....   |                          |     | 1     | 1  | S04    |
|      |                                                                                                                     | .....uggucaagcuugaggggagugu.....   |                          |     | 1     | 0  | S04    |
|      |                                                                                                                     | .....ggucaagcCugaggggaguguug.....  |                          |     | 1     | 1  | S04    |
|      |                                                                                                                     | .....aagcuugaggggagugu.....        |                          |     | 1     | 0  | S04    |







Star

Mature

|                                                                                                |    |   |     |
|------------------------------------------------------------------------------------------------|----|---|-----|
| agcgaccaagcucgagccaagcucggucgcuacguagcgaccgacaguguguccauucggucgcuacguggugaccgagcucuccgaaacgucg |    |   |     |
| .....ugaccUagcucuccgaaacgucg.....                                                              | 1  | 1 | S03 |
| .....ugaccgagcucuccgaaacgucg.....                                                              | 6  | 0 | S03 |
| .....gaccgaAcucuccgaaacgucga.....                                                              | 1  | 1 | S03 |
| .....gaccgagcucuccgaaacgucgC.....                                                              | 1  | 1 | S03 |
| .....gaccgagcucuccgaaacgucga.....                                                              | 4  | 0 | S03 |
| .....accgagcucuccgaaacgucg.....                                                                | 2  | 0 | S03 |
| .....accgagcCcuuccgaaacgucgau.....                                                             | 1  | 1 | S03 |
| .....accgaCcuuccgaaacgucgau.....                                                               | 1  | 1 | S03 |
| .....accgagcucuccgaaacgucgaA.....                                                              | 1  | 1 | S03 |
| .....accgagcucuccgaaacgucgaC.....                                                              | 2  | 1 | S03 |
| .....accgagcucuccgaaacgucgau.....                                                              | 19 | 0 | S03 |
| .....accgagcucuccgaaacgucgaua.....                                                             | 1  | 0 | S03 |
| .....ccgagcucuccgaaacg.....                                                                    | 1  | 0 | S03 |
| .....ccgagcucuccgaaacgucga.....                                                                | 2  | 0 | S03 |
| .....ccgagcucuccgaaacgucgaC.....                                                               | 1  | 1 | S03 |
| .....ccgagcucuccgGaacgucgau.....                                                               | 1  | 1 | S03 |
| .....ccgagcucuccgaaacgucgau.....                                                               | 2  | 0 | S03 |
| .....ccgagcucuccgaaacgucgaua.....                                                              | 9  | 0 | S03 |
| .....cgagcucuccgaaacgucga.....                                                                 | 1  | 0 | S03 |
| .....cgagcucuccgaaacgucgau.....                                                                | 4  | 0 | S03 |
| .....cgagcucuccgaaacgucgaA.....                                                                | 1  | 1 | S03 |
| .....cgagcucuccgaaacgucgaua.....                                                               | 7  | 0 | S03 |
| .....cgagcucuccgaaacgucgauu.....                                                               | 4  | 0 | S03 |
| .....gagcucuccgaaacgucgaua.....                                                                | 1  | 0 | S03 |
| .....agcucuccgaaacgucgaua.....                                                                 | 1  | 0 | S03 |
| .....agccaagcucggucgcuacguagc.....                                                             | 1  | 0 | S04 |
| .....gcucggucgcuacguagcg.....                                                                  | 1  | 0 | S04 |
| .....acguggCgaccgagcucu.....                                                                   | 1  | 1 | S04 |
| .....gaccgagcucuccgaaacgucg.....                                                               | 1  | 0 | S04 |
| .....gaccgagcucuccgaaacgucga.....                                                              | 2  | 0 | S04 |
| .....accgagcucuccgaaacg.....                                                                   | 1  | 0 | S04 |
| .....accgaAcucuccgaaacguc.....                                                                 | 1  | 1 | S04 |
| .....accgagcucuccgaaacguc.....                                                                 | 2  | 0 | S04 |
| .....accgagcucuccgaaacgucgau.....                                                              | 4  | 0 | S04 |
| .....ccgagcucuccgaaacgucgau.....                                                               | 1  | 0 | S04 |
| .....ccgagcucuccgaaacgucgauU.....                                                              | 1  | 1 | S04 |
| .....cgagcucuccgaaacgucgaua.....                                                               | 2  | 0 | S04 |



Provisional ID : chrAnn\_random\_3109904  
 Score total : 0  
 Score for star read(s) : 3.9  
 Score for read counts : -4.9  
 Score for mfe : 1  
 Score for randfold : 0  
 Score for cons. seed :  
 Total read count : 2  
 Mature read count : 1  
 Loop read count : 0  
 Star read count : 1

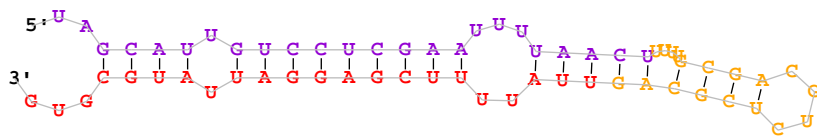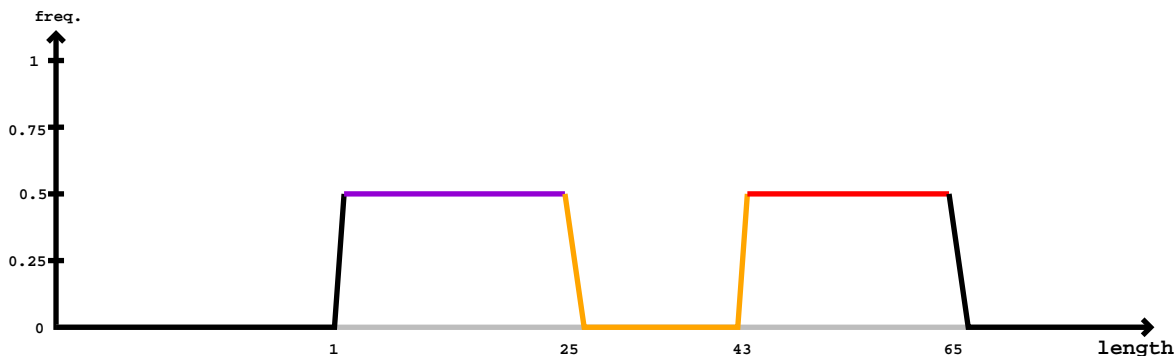

**Star**

**Mature**

|                                                                                                                 |       |     |  |        |
|-----------------------------------------------------------------------------------------------------------------|-------|-----|--|--------|
| 5' - nnnnnnnnnngucggacaauuguuuagcauuguccucgaauuuaacuuuuugcgacgucucgcaguuuuuuucgaggauuaugcguguuugaaggugauaaucuuu | -3'   | obs |  |        |
| nnnnnnnnnnngucggacaauuguuuagcauuguccucgaauuuaacuuuuugcgacgucucgcaguuuuuuucgaggauuaugcguguuugaaggugauaaucuuu     |       | exp |  |        |
| .....(((((((.....(((((((.....(((((((.....((((.....((((.....)))))))))))))))))))))))).....                        | reads | mm  |  | sample |
| .....uagcauuguccucgaaucuaacu.....                                                                               | 1     | 1   |  | S04    |
| .....uuuuuuucgaggauuaugcgug.....                                                                                | 1     | 0   |  | S04    |







Star

Mature

|                                                  |                       |                                          |   |   |     |
|--------------------------------------------------|-----------------------|------------------------------------------|---|---|-----|
| uuuuuauaaagcuaccaagcauuugugacuaaggaguugauugguuuu | ccgguuaccaccgcaaccgca | gcuuuugcgguugguagcgguugauggccuuucaaacaau |   |   |     |
| .....uuuugcgguugguagcgg.....                     |                       |                                          | 1 | 0 | S04 |
| .....uuuugcgguugguagcggug.....                   |                       |                                          | 1 | 0 | S04 |
| .....uuugcgguugguagcgg.....                      |                       |                                          | 1 | 0 | S04 |
| .....ugcgguugguagcggug.....                      |                       |                                          | 1 | 0 | S04 |
| .....gcgguugguagcgguga.....                      |                       |                                          | 2 | 0 | S04 |
| .....gcgguugguagcggugau.....                     |                       |                                          | 1 | 0 | S04 |

Provisional ID : chrAnn\_random\_3127320  
 Score total : 27.8  
 Score for star read(s) : 3.9  
 Score for read counts : 25.1  
 Score for mfe : -1.1  
 Score for randfold : 0  
 Score for cons. seed :  
 Total read count : 61  
 Mature read count : 59  
 Loop read count : 0  
 Star read count : 2

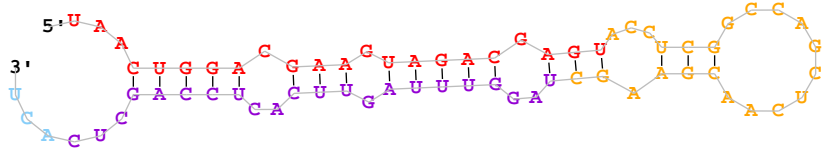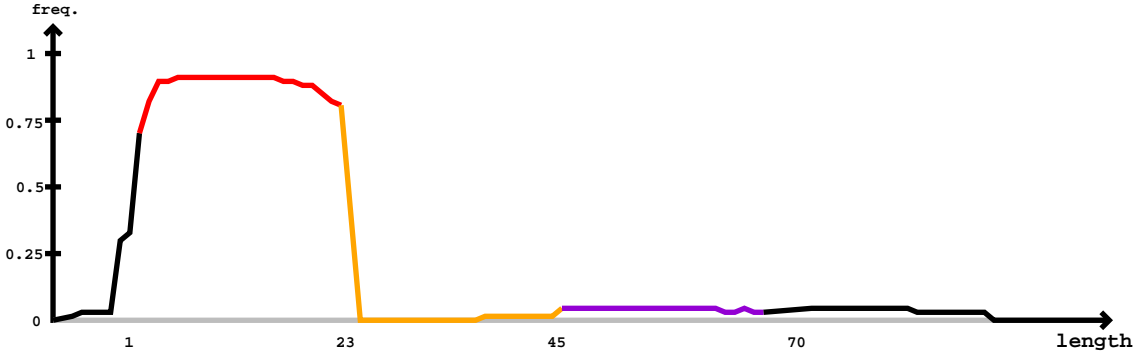

**Mature** **Star**

| 5'                            | reads | mm | sample |
|-------------------------------|-------|----|--------|
| aagacgguaacuggacgaaguagacgagG | 1     | 0  | S03    |
| aaacuggacgaaguagacgagG        | 4     | 1  | S03    |
| uaacuggacgaaguagacgagG        | 4     | 0  | S03    |
| aaacuggacgaaguagacgagG        | 1     | 1  | S03    |
| aaacuggacgaaguagacgagG        | 2     | 0  | S03    |
| aaacuggacgaaguagacgagG        | 1     | 1  | S03    |
| aaacuggacgaaguagacgagG        | 1     | 0  | S03    |
| aaacuggacgaaguagacgagG        | 1     | 1  | S03    |
| aaacuggacgaaguagacgagG        | 1     | 0  | S03    |
| aaacuggacgaaguagacgagG        | 1     | 1  | S03    |
| aaacuggacgaaguagacgagG        | 1     | 0  | S04    |
| aaacuggacgaaguagacgagG        | 1     | 0  | S04    |
| aaacuggacgaaguagacgagG        | 1     | 0  | S04    |
| aaacuggacgaaguagacgagG        | 11    | 0  | S04    |
| aaacuggacgaaguagacgagG        | 1     | 1  | S04    |
| aaacuggacgaaguagacgagG        | 2     | 0  | S04    |
| aaacuggacgaaguagacgagG        | 1     | 1  | S04    |
| aaacuggacgaaguagacgagG        | 1     | 0  | S04    |
| aaacuggacgaaguagacgagG        | 1     | 1  | S04    |
| aaacuggacgaaguagacgagG        | 1     | 1  | S04    |
| aaacuggacgaaguagacgagG        | 2     | 1  | S04    |
| aaacuggacgaaguagacgagG        | 13    | 0  | S04    |
| aaacuggacgaaguagacgagG        | 1     | 1  | S04    |
| aaacuggacgaaguagacgagG        | 1     | 0  | S04    |
| aaacuggacgaaguagacgagG        | 1     | 1  | S04    |
| aaacuggacgaaguagacgagG        | 3     | 0  | S04    |
| aaacuggacgaaguagacgagG        | 2     | 0  | S04    |
| aaacuggacgaaguagacgagG        | 1     | 1  | S04    |
| aaacuggacgaaguagacgagG        | 1     | 1  | S04    |
| aaacuggacgaaguagacgagG        | 1     | 1  | S04    |
| aaacuggacgaaguagacgagG        | 1     | 1  | S04    |
| aaacuggacgaaguagacgagG        | 1     | 0  | S04    |
| aaacuggacgaaguagacgagG        | 1     | 0  | S04    |
| aaacuggacgaaguagacgagG        | 1     | 0  | S04    |

**Mature**

**Star**

aagacgguaacuggacgaaguagacgaguaaccucggccagcucaacgaagcuagguuuaguucacuccagcucacucccuacuaagucaguccacuagcuggacuac  
.....uccuacuaagucaguccac.....

1

0

S04

Provisional ID : chrAnn\_random\_3130007  
 Score total : 200.8  
 Score for star read(s) : 3.9  
 Score for read counts : 204.1  
 Score for mfe : -7.1  
 Score for randfold : 0  
 Score for cons. seed :  
 Total read count : 412  
 Mature read count : 410  
 Loop read count : 0  
 Star read count : 2

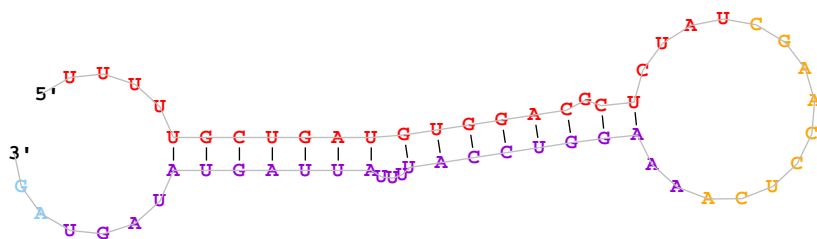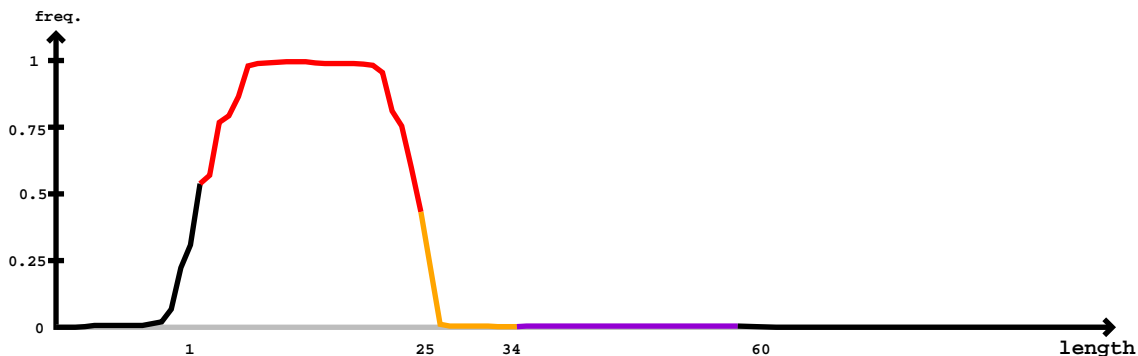

**Mature** **Star**

| 5'                                                   | obs | reads | mm | sample |
|------------------------------------------------------|-----|-------|----|--------|
| ucgggagaaaUUUUUUUUGCUGAUGUGGACGCUCUAUCGAACCUC        | exp |       |    |        |
| ucgggagaaaUUUUUUUUGCUGAUGUGGACGCUCUAUCGAACCUC        | exp |       |    |        |
| ...(((.....((((((((((((.....)))))))).....))))))..... |     |       |    |        |
| .gAgagaaaUUUUUUUUGCUGAUGUGGACGCUCUAUCGAACCUC         |     | 1     | 1  | S03    |
| .....aUUUUUUUUGCUGAUGUGGACGCUCUAUCGAACCUC            |     | 1     | 0  | S03    |
| .....aUUUUUUUCUGCUGAUGUGGACGCUCUAUCGAACCUC           |     | 1     | 1  | S03    |
| .....aUUUUUUUUGCUGAUGUGGACGCUCUAUCGAACCUC            |     | 1     | 1  | S03    |
| .....aUUUUUUUCUGCUGAUGUGGACGCUCUAUCGAACCUC           |     | 1     | 1  | S03    |
| .....UUUUUUUUGCUAAUGUGGACGCUCUAUCGAACCUC             |     | 1     | 1  | S03    |
| .....UUUUUUUUGCUGAUGUGGACGCUCUAUCGAACCUC             |     | 4     | 0  | S03    |
| .....UUUUUUUUGCUGAUGUGGACGCUCUAUCGAACCUC             |     | 1     | 1  | S03    |
| .....UUUUUUUUGCUGAUGUGGACGCUCUAUCGAACCUC             |     | 2     | 0  | S03    |
| .....UUUUUUUUGCUGAUGUGGACGCUCUAUCGAACCUC             |     | 1     | 0  | S03    |
| .....UUUUUUUUGCUGAUGUGGACGCUCUAUCGAACCUC             |     | 1     | 0  | S03    |
| .....UUUUUUUUGCUGAUGUGGACGCUCUAUCGAACCUC             |     | 2     | 0  | S03    |
| .....UUUUUUUUGCUGAUGUGGACGCUCUAUCGAACCUC             |     | 21    | 0  | S03    |
| .....UUUUUUUUGCUGAUGUGGACGCUCUAUCGAACCUC             |     | 2     | 1  | S03    |
| .....UUUUUUUUGCUAAUGUGGACGCUCUAUCGAACCUC             |     | 4     | 1  | S03    |
| .....UUUUUUUUGCUGAUGUGGACGCUCUAUCGAACCUC             |     | 1     | 0  | S03    |
| .....UUUUUUUUGCUGAUGUGGACGCUCUAUCGAACCUC             |     | 1     | 1  | S03    |
| .....UUUUUUUUGCUGAUGUGGACGCUCUAUCGAACCUC             |     | 3     | 1  | S03    |
| .....UUUUUUUUGCUGAUGUGGACGCUCUAUCGAACCUC             |     | 7     | 0  | S03    |
| .....UUUUUUUUGCUGAUGUGGACGCUCUAUCGAACCUC             |     | 4     | 0  | S03    |
| .....UUUUUUUUGCUGAUGUGGACGCUCUAUCGAACCUC             |     | 4     | 0  | S03    |
| .....UUUUGUUGCUGAUGUGGACGCUCUAUCGAACCUC              |     | 1     | 1  | S03    |
| .....UUUUUUUUGCUGAUGUGGACGCUCUAUCGAACCUC             |     | 2     | 1  | S03    |
| .....UUUUUUUUGCUGAUGUGGACGCUCUAUCGAACCUC             |     | 1     | 1  | S03    |
| .....UUUUUUUUGCUGAUGUGGACGCUCUAUCGAACCUC             |     | 3     | 0  | S03    |
| .....UUUUUUUUGCUGAUGUGGACGCUCUAUCGAACCUC             |     | 1     | 0  | S03    |
| .....UUUUUUUUGCUGAUGUGGACGCUCUAUCGAACCUC             |     | 1     | 1  | S03    |
| .....UUUUUUUUGCUAAUGUGGACGCUCUAUCGAACCUC             |     | 2     | 1  | S03    |
| .....UUUUUUUUGCUGAUGUGGACGCUCUAUCGAACCUC             |     | 2     | 0  | S03    |
| .....UUUUUUUUGCUGAUGUGGACGCUCUAUCGAACCUC             |     | 1     | 1  | S03    |
| .....UUUUUUUUGCUGAUGUGGACGCUCUAUCGAACCUC             |     | 3     | 0  | S03    |
| .....UUUUUUUUGCUGAUGUGGACGCUCUAUCGAACCUC             |     | 1     | 1  | S03    |
| .....UUUUUUUUGCUGAUGUGGACGCUCUAUCGAACCUC             |     | 5     | 0  | S03    |

# Mature

# Star

ucgggagaaauuuuuuuugcugauguggacgcucuaucgaaacucaaaagguccauuuuuuaguuauguaguuaucuuacauauuuuuuaguaguauuccauuuuu

|                                                        |    |   |     |
|--------------------------------------------------------|----|---|-----|
| . . . . .uuuuugcugauguggacgcucG . . . . .              | 1  | 1 | S03 |
| . . . . .uuuuugcugauguggacgcucGa . . . . .             | 1  | 1 | S03 |
| . . . . .uuuuugcugauguggacgcucua . . . . .             | 11 | 0 | S03 |
| . . . . .uuuuugcugauguggacgcucuU . . . . .             | 1  | 1 | S03 |
| . . . . .uuuuugcugaucuggacgcucua . . . . .             | 1  | 1 | S03 |
| . . . . .uuuucugcugauguggacgcucua . . . . .            | 1  | 1 | S03 |
| . . . . .uuuuugcugauguggacgcucua . . . . .             | 26 | 0 | S03 |
| . . . . .uuuuugcugauguggacgcucua . . . . .             | 1  | 1 | S03 |
| . . . . .uuuuugcugauguggacgcucuaA . . . . .            | 1  | 1 | S03 |
| . . . . .uuuuCgcugauguggacgcucuauc . . . . .           | 1  | 1 | S03 |
| . . . . .uuuuugcugauguggacgcucuauc . . . . .           | 2  | 0 | S03 |
| . . . . .uuuuugcugauguggacgcucuaU . . . . .            | 2  | 1 | S03 |
| . . . . .uuuugcugauguggacgc . . . . .                  | 2  | 0 | S03 |
| . . . . .uuuugcugauguggacgcucua . . . . .              | 3  | 0 | S03 |
| . . . . .uuuugcugauguggacgcucuaA . . . . .             | 1  | 1 | S03 |
| . . . . .uuuugcugauguggacgcucua . . . . .              | 1  | 0 | S03 |
| . . . . .uuuugcugauguggacgcucuaA . . . . .             | 3  | 1 | S03 |
| . . . . .uuuugcugauguggacgcucuauc . . . . .            | 1  | 0 | S03 |
| . . . . .uuugcugauguggacgcua . . . . .                 | 1  | 1 | S03 |
| . . . . .uuugcugGuguggacgcucu . . . . .                | 1  | 1 | S03 |
| . . . . .uuugcugauguggacgcucu . . . . .                | 3  | 0 | S03 |
| . . . . .uuugcugauguggacgcucua . . . . .               | 2  | 0 | S03 |
| . . . . .uucugcugauguggacgcucua . . . . .              | 1  | 1 | S03 |
| . . . . .uuGcugauguggacgcucua . . . . .                | 1  | 1 | S03 |
| . . . . .uuugcugauguggacgcucua . . . . .               | 11 | 0 | S03 |
| . . . . .uuugcugUuguggacgcucua . . . . .               | 1  | 1 | S03 |
| . . . . .uuugcugauguggacgUcuauc . . . . .              | 1  | 1 | S03 |
| . . . . .uuugcugauguggacgcucuaU . . . . .              | 4  | 1 | S03 |
| . . . . .uuugcugaugUgacgcucuauc . . . . .              | 1  | 1 | S03 |
| . . . . .uuugcugauguggacgcucuaA . . . . .              | 21 | 1 | S03 |
| . . . . .uugcugauguggacgcucu . . . . .                 | 1  | 0 | S03 |
| . . . . .uugcugauguggacgcucua . . . . .                | 1  | 0 | S03 |
| . . . . .uugcugauguggacgcucuaA . . . . .               | 4  | 1 | S03 |
| . . . . .ugcugauguggacgcucu . . . . .                  | 7  | 0 | S03 |
| . . . . .ugcugauguggacgcucG . . . . .                  | 2  | 1 | S03 |
| . . . . .ugcugauguggacgcucua . . . . .                 | 4  | 0 | S03 |
| . . . . .ugcugauguggacgcucua . . . . .                 | 1  | 0 | S03 |
| . . . . .ugcugauguggacgcucuaG . . . . .                | 2  | 1 | S03 |
| . . . . .ugcugauguggacgcucuauc . . . . .               | 1  | 0 | S03 |
| . . . . .ugcugauguggacgcucuaA . . . . .                | 2  | 1 | S03 |
| . . . . .ugcugauguggacgcucuaU . . . . .                | 2  | 1 | S03 |
| . . . . .gcugauguggacgcucua . . . . .                  | 21 | 0 | S03 |
| . . . . .gcugauguggacgcucua . . . . .                  | 13 | 0 | S03 |
| . . . . .gcugauguggacgcucuaG . . . . .                 | 1  | 1 | S03 |
| . . . . .gcugauguggacgcucuauc . . . . .                | 3  | 0 | S03 |
| . . . . .gcugaugAagacgcucuauc . . . . .                | 1  | 1 | S03 |
| . . . . .gcugauguggacgcucuaCc . . . . .                | 1  | 1 | S03 |
| . . . . .cugauguggacgcucua . . . . .                   | 3  | 0 | S03 |
| . . . . .ugauguggacgcucuauc . . . . .                  | 1  | 0 | S03 |
| . . . . . . . . . . .aaagguccauuuuuuaguuaugC . . . . . | 1  | 1 | S03 |
| . . . . . . . . . . .aaggucUuuuuuuaguuaugu . . . . .   | 1  | 1 | S03 |
|                                                        |    |   |     |
| .cgggagaaauuuuuuuugcugaug . . . . .                    | 1  | 1 | S04 |
| .gAgagaaauuuuuuuugcugaugu . . . . .                    | 1  | 1 | S04 |
| . . . . .aauuuuuuCugcugauguggacgc . . . . .            | 1  | 1 | S04 |
| . . . . .auuuuuuuugcugauguggacgcC . . . . .            | 1  | 1 | S04 |
| . . . . .uuuuuuuuugcuAauguggacg . . . . .              | 1  | 1 | S04 |
| . . . . .uuuuuuuuugcugauguggacgc . . . . .             | 1  | 0 | S04 |
| . . . . .uuuuuuuuugcuAauguggacgc . . . . .             | 1  | 1 | S04 |
| . . . . .uuuuuuuuugcugauguggacgcG . . . . .            | 1  | 1 | S04 |
| . . . . .uuuuuuuuugcugauguggacgc . . . . .             | 2  | 0 | S04 |
| . . . . .uuuuuuuuugcugaCguggacgcuc . . . . .           | 1  | 1 | S04 |
| . . . . .uuuuuuuuugcugauguggacgcuc . . . . .           | 3  | 0 | S04 |
| . . . . .uuuuuuuuugcugauguggacUcucu . . . . .          | 1  | 1 | S04 |
| . . . . .uuuuuuuuugcugauguggacgcucu . . . . .          | 1  | 0 | S04 |
| . . . . .uuuuuuuuugcugauguggacgc . . . . .             | 1  | 0 | S04 |
| . . . . .uuuuuuuuugcugauguggacgc . . . . .             | 4  | 0 | S04 |
| . . . . .uuuuuuuuugcuAauguggacgc . . . . .             | 3  | 1 | S04 |
| . . . . .uuuuuuuuugcugauguggacgcG . . . . .            | 1  | 1 | S04 |
| . . . . .uuuuuuuuugcugaCguggacgcuc . . . . .           | 1  | 1 | S04 |



Provisional ID : chrAnn\_random\_3133343  
 Score total : 0  
 Score for star read(s) : -1.3  
 Score for read counts : 0  
 Score for mfe : 1.2  
 Score for randfold : 0  
 Score for cons. seed :  
 Total read count : 27  
 Mature read count : 25  
 Loop read count : 2  
 Star read count : 0

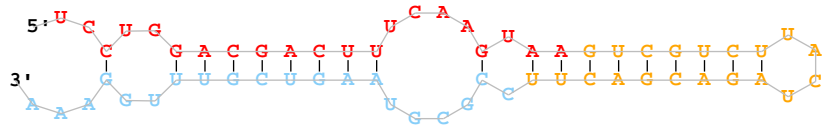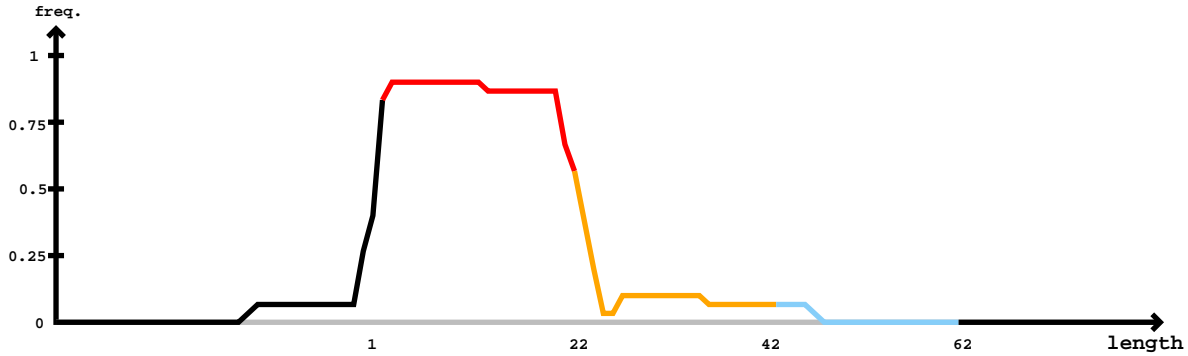

**Mature**

**Star**

| 5' -                                                                                                                               | reads | mm | sample |
|------------------------------------------------------------------------------------------------------------------------------------|-------|----|--------|
| aucuaggaaauaaucucagacgacuuuguuuu <u>uccuggacgacuuucaaguaagucgucuuacuagacgacuu</u> <u>ccgcguaagucguuuggaaaaaguu</u> aaauuuuuaaguuuu | 1     | 1  | S03    |
| .....ua <u>uccuggacgacuuucaagG</u> .....                                                                                           | 1     | 1  | S03    |
| .....ua <u>uccuggacgacuuucaagA</u> .....                                                                                           | 1     | 1  | S03    |
| .....ua <u>uccuggacgacuuucaagu</u> .....                                                                                           | 3     | 0  | S03    |
| .....a <u>uccuggacgacuuucaagua</u> .....                                                                                           | 1     | 0  | S03    |
| .....a <u>ucAuggacgacuuucaaguaagu</u> .....                                                                                        | 1     | 1  | S03    |
| .....a <u>uccuggacgacuuucaaguaagu</u> .....                                                                                        | 1     | 0  | S03    |
| ..... <u>uccuggacgacuuucaagua</u> .....                                                                                            | 1     | 0  | S03    |
| ..... <u>uccuggacgacuuucaaguaa</u> .....                                                                                           | 6     | 0  | S03    |
| ..... <u>uccuggacgacuuucaaguaag</u> .....                                                                                          | 2     | 0  | S03    |
| ..... <u>uccuggacgacuuucaaguaUg</u> .....                                                                                          | 1     | 1  | S03    |
| ..... <u>uccuggacgacuuucaaguaaU</u> .....                                                                                          | 1     | 1  | S03    |
| ..... <u>uccuggacgacuuucaaguaagA</u> .....                                                                                         | 1     | 1  | S03    |
| ..... <u>ccuggacgacuuucaaguaagu</u> .....                                                                                          | 1     | 0  | S03    |
| ..... <u>ucuuacuGgacgacuuuccgcg</u> .....                                                                                          | 1     | 1  | S03    |
| ..... <u>gacgacuuuguuuauccuggacga</u> .....                                                                                        | 1     | 0  | S04    |
| ..... <u>acgacuuuguuuauccuggacgaU</u> .....                                                                                        | 1     | 1  | S04    |
| .....ua <u>uccuggacgacuuucaagu</u> .....                                                                                           | 1     | 0  | S04    |
| .....a <u>uccuggacgacuuucaagua</u> .....                                                                                           | 1     | 0  | S04    |
| ..... <u>uccuggacgacuuucaaguaa</u> .....                                                                                           | 1     | 0  | S04    |
| ..... <u>ccuggacgacuuucaaaCuaagu</u> .....                                                                                         | 1     | 1  | S04    |
| ..... <u>cuuucaaguaagucgucuuacuGg</u> .....                                                                                        | 1     | 1  | S04    |
| ..... <u>ucuuacuGgacgacuuuccgc</u> .....                                                                                           | 1     | 1  | S04    |



Provisional ID : chrAnn\_random\_3133344  
 Score total : 0.7  
 Score for star read(s) : -1.3  
 Score for read counts : 0  
 Score for mfe : 2  
 Score for randfold : 0  
 Score for cons. seed :  
 Total read count : 25  
 Mature read count : 25  
 Loop read count : 0  
 Star read count : 0

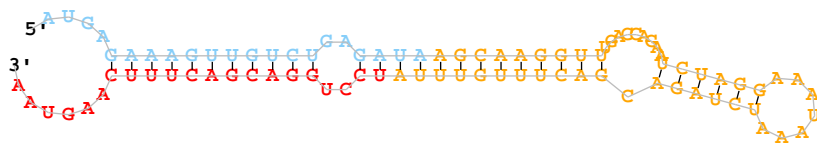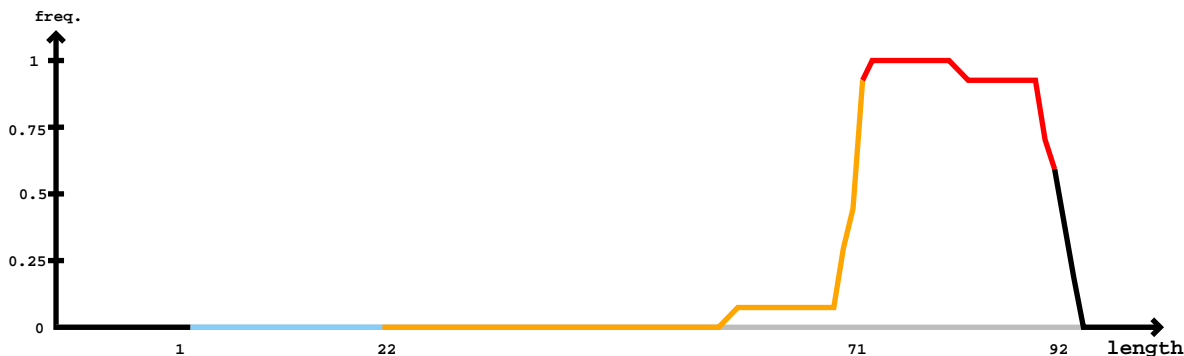

Star

Mature

| 5' | Star         | Mature                | -3'                                             | exp                  | reads       | mm  | sample |
|----|--------------|-----------------------|-------------------------------------------------|----------------------|-------------|-----|--------|
| 5' | gguagacgaugu | augagaaaguugucugagaua | agcaagguuugaccagaaucaaggaaauaaucucagacgacuuuuuu | uaccuggacgacuucaagua | aagucgucuac | -3' | exp    |
|    | .....        | .....                 | .....                                           | .....                | 3           | 0   | S03    |
|    | .....        | .....                 | .....                                           | .....                | 1           | 1   | S03    |
|    | .....        | .....                 | .....                                           | .....                | 1           | 1   | S03    |
|    | .....        | .....                 | .....                                           | .....                | 1           | 0   | S03    |
|    | .....        | .....                 | .....                                           | .....                | 1           | 0   | S03    |
|    | .....        | .....                 | .....                                           | .....                | 1           | 1   | S03    |
|    | .....        | .....                 | .....                                           | .....                | 1           | 0   | S03    |
|    | .....        | .....                 | .....                                           | .....                | 6           | 0   | S03    |
|    | .....        | .....                 | .....                                           | .....                | 2           | 0   | S03    |
|    | .....        | .....                 | .....                                           | .....                | 1           | 1   | S03    |
|    | .....        | .....                 | .....                                           | .....                | 1           | 1   | S03    |
|    | .....        | .....                 | .....                                           | .....                | 1           | 1   | S03    |
|    | .....        | .....                 | .....                                           | .....                | 1           | 0   | S03    |
|    | .....        | .....                 | .....                                           | .....                | 1           | 0   | S04    |
|    | .....        | .....                 | .....                                           | .....                | 1           | 1   | S04    |
|    | .....        | .....                 | .....                                           | .....                | 1           | 0   | S04    |
|    | .....        | .....                 | .....                                           | .....                | 1           | 0   | S04    |
|    | .....        | .....                 | .....                                           | .....                | 1           | 0   | S04    |
|    | .....        | .....                 | .....                                           | .....                | 1           | 1   | S04    |

Provisional ID : chrAnn\_random\_3148615  
 Score total : 0.7  
 Score for star read(s) : -1.3  
 Score for read counts : 0  
 Score for mfe : 2  
 Score for randfold : 0  
 Score for cons. seed :  
 Total read count : 1250  
 Mature read count : 936  
 Loop read count : 10  
 Star read count : 304

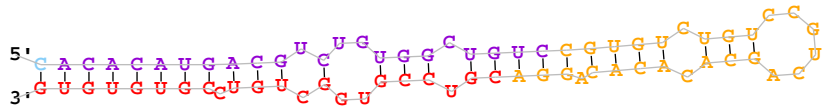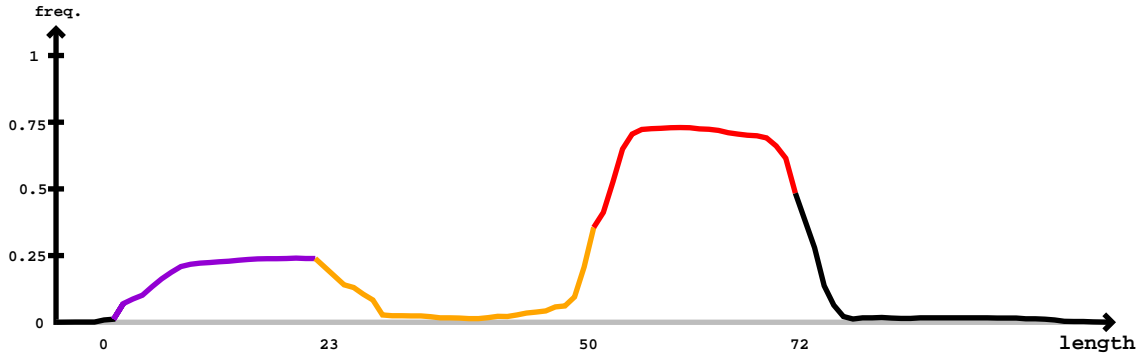

**Star**

**Mature**

| 5' -                          | obs | exp | reads | mm | sample |
|-------------------------------|-----|-----|-------|----|--------|
| agcacacacaugaagcugucugggcuguc | 1   | 1   | 1     | 1  | S03    |
| agcacacacaugaagcugucugggcuguc | 1   | 1   | 1     | 1  | S03    |
| ..Gcacacaugaagcugucugggcuguc  | 1   | 0   | 1     | 0  | S03    |
| ..acacaugaagcugucugggcuguc    | 4   | 0   | 4     | 0  | S03    |
| ..acacaugaagcugucugggcuguc    | 1   | 1   | 1     | 1  | S03    |
| ..acacaugaagcugucugggcuguc    | 1   | 1   | 1     | 1  | S03    |
| ..cacaugaagcugucugggcuguc     | 1   | 0   | 1     | 0  | S03    |
| ..acaugaagcugucugggcuguc      | 2   | 0   | 2     | 0  | S03    |
| ..acaugaagcugucugggcuguc      | 1   | 1   | 1     | 1  | S03    |
| ..acaugaagcugucugggcuguc      | 1   | 0   | 1     | 0  | S03    |
| ..acaugaagcugucugggcuguc      | 2   | 0   | 2     | 0  | S03    |
| ..caugaagcugucugggcuguc       | 1   | 0   | 1     | 0  | S03    |
| ..caugaagcugucugggcuguc       | 1   | 1   | 1     | 1  | S03    |
| ..caugaagcugucugggcuguc       | 2   | 1   | 2     | 1  | S03    |
| ..caugaagcugucugggcuguc       | 1   | 0   | 1     | 0  | S03    |
| ..augaagcugucugggcuguc        | 1   | 0   | 1     | 0  | S03    |
| ..augaagcugucugggcuguc        | 1   | 1   | 1     | 1  | S03    |
| ..augaagcugucugggcuguc        | 4   | 0   | 4     | 0  | S03    |
| ..Cgaagcugucugggcuguc         | 1   | 1   | 1     | 1  | S03    |
| ..uUaagcugucugggcuguc         | 1   | 1   | 1     | 1  | S03    |
| ..ugaagcugucugggcuguc         | 1   | 1   | 1     | 1  | S03    |
| ..ugaagcugucugggcuguc         | 1   | 0   | 1     | 0  | S03    |
| ..gaagcugucugggcuguc          | 2   | 0   | 2     | 0  | S03    |
| ..acgucugucugggcuguc          | 1   | 0   | 1     | 0  | S03    |
| ..uAagcugucugggcuguc          | 1   | 1   | 1     | 1  | S03    |
| ..uggcugucugggcuguc           | 1   | 1   | 1     | 1  | S03    |
| ..cugucugggcuguc              | 1   | 1   | 1     | 1  | S03    |
| ..agcacacacaggUcguccguggc     | 1   | 1   | 1     | 1  | S03    |
| ..cacacacaggUcguccguggc       | 1   | 1   | 1     | 1  | S03    |
| ..cacacacaggacgucugggcugG     | 1   | 1   | 1     | 1  | S03    |
| ..acacacaggacgucugggcugG      | 1   | 1   | 1     | 1  | S03    |
| ..cacaggacgucugggcugG         | 1   | 1   | 1     | 1  | S03    |

Star

Mature

|                                                        |                                                         |    |   |     |
|--------------------------------------------------------|---------------------------------------------------------|----|---|-----|
| agcacaacaugacgucuguggcuguccgugucuguccgucagcacaacacagga | cgucccgugggcuguccgugugucccguguguccguguguccguguccgucgaca |    |   |     |
| .....cacaggacguccgugggcugugGcgu.....                   | .....                                                   | 1  | 1 | S03 |
| .....acaggacguccgugggcuguccg.....                      | .....                                                   | 1  | 0 | S03 |
| .....caggacguccgugggcuguccgug.....                     | .....                                                   | 1  | 0 | S03 |
| .....aggacguccgugggcuguccgugug.....                    | .....                                                   | 6  | 0 | S03 |
| .....aggacguccgugggcuguccgugug.....                    | .....                                                   | 1  | 0 | S03 |
| .....gacguccgugggcuguccg.....                          | .....                                                   | 1  | 0 | S03 |
| .....gacguccgugggcuguccg.....                          | .....                                                   | 1  | 0 | S03 |
| .....Uacguccgugggcuguccgugug.....                      | .....                                                   | 1  | 1 | S03 |
| .....gacguccgugggcuguccgugug.....                      | .....                                                   | 2  | 0 | S03 |
| .....gacguccgugggcuguccgugug.....                      | .....                                                   | 1  | 0 | S03 |
| .....gacguccgugggcuguccgugug.....                      | .....                                                   | 4  | 0 | S03 |
| .....acguccgugggcuguccgug.....                         | .....                                                   | 1  | 0 | S03 |
| .....acguccgugggcuguccgugug.....                       | .....                                                   | 7  | 0 | S03 |
| .....acguccgugggcuguccgugGgu.....                      | .....                                                   | 1  | 1 | S03 |
| .....acguccgugggcuguccgugug.....                       | .....                                                   | 13 | 0 | S03 |
| .....acguccgugggcuguccgugugC.....                      | .....                                                   | 3  | 1 | S03 |
| .....acgCccgugggcuguccgugug.....                       | .....                                                   | 1  | 1 | S03 |
| .....acguccgugggcuguccgugugA.....                      | .....                                                   | 2  | 1 | S03 |
| .....acguccgugggcuguccgugugug.....                     | .....                                                   | 2  | 0 | S03 |
| .....acguccgugggcuguccgugugug.....                     | .....                                                   | 6  | 0 | S03 |
| .....aGguccgugggcuguccgugugug.....                     | .....                                                   | 1  | 1 | S03 |
| .....cguccgugggcuguccgug.....                          | .....                                                   | 1  | 0 | S03 |
| .....cguccgugggcuguccgugug.....                        | .....                                                   | 1  | 0 | S03 |
| .....cguccgugggcuguccgugugC.....                       | .....                                                   | 1  | 1 | S03 |
| .....cguccgugggcuguccgugug.....                        | .....                                                   | 4  | 0 | S03 |
| .....cguccgugggcuguccgugugug.....                      | .....                                                   | 31 | 0 | S03 |
| .....cguccgAgggcuguccgugugug.....                      | .....                                                   | 1  | 1 | S03 |
| .....cguccgugggcuguccgugugug.....                      | .....                                                   | 1  | 0 | S03 |
| .....cguccgugggcuguccguguguguc.....                    | .....                                                   | 7  | 0 | S03 |
| .....guccgugggcuguccgugug.....                         | .....                                                   | 2  | 0 | S03 |
| .....guccgugggcuguccgugugug.....                       | .....                                                   | 5  | 0 | S03 |
| .....guccgugggcuguccgugugugA.....                      | .....                                                   | 1  | 1 | S03 |
| .....guccgugggcuguccgugugug.....                       | .....                                                   | 3  | 0 | S03 |
| .....uccgugggcuguccgugug.....                          | .....                                                   | 1  | 0 | S03 |
| .....uccgugggcuguccgugugG.....                         | .....                                                   | 1  | 1 | S03 |
| .....uccgugggcuguccgugugug.....                        | .....                                                   | 1  | 0 | S03 |
| .....uccgugggcuguccgugugug.....                        | .....                                                   | 3  | 0 | S03 |
| .....uccgugggcuguccguguguguc.....                      | .....                                                   | 10 | 0 | S03 |
| .....uccgCggcuguccguguguguc.....                       | .....                                                   | 1  | 1 | S03 |
| .....ucGgugggcuguccguguguguc.....                      | .....                                                   | 1  | 1 | S03 |
| .....uccgugggcuguccguguguguccg.....                    | .....                                                   | 4  | 0 | S03 |
| .....ccgugggcuguccgugug.....                           | .....                                                   | 3  | 0 | S03 |
| .....ccgugggcuguccgugugug.....                         | .....                                                   | 1  | 0 | S03 |
| .....ccgugggcuguccgugugug.....                         | .....                                                   | 4  | 0 | S03 |
| .....ccgugggcuguccgugugCgu.....                        | .....                                                   | 1  | 1 | S03 |
| .....ccgugggcuguccgugugugA.....                        | .....                                                   | 1  | 1 | S03 |
| .....ccgugggcuguccguguguguc.....                       | .....                                                   | 1  | 1 | S03 |
| .....ccgugggcuguccguguguguc.....                       | .....                                                   | 17 | 0 | S03 |
| .....ccgugggcugAaccguguguguc.....                      | .....                                                   | 1  | 1 | S03 |
| .....ccgugggcuguccgugugugugAac.....                    | .....                                                   | 1  | 1 | S03 |
| .....ccgugggcuguccgugugugucc.....                      | .....                                                   | 1  | 1 | S03 |
| .....ccgugggcuguccgugugugucc.....                      | .....                                                   | 5  | 0 | S03 |
| .....ccgugggcuguccguguguguccg.....                     | .....                                                   | 2  | 0 | S03 |
| .....cgugggcuguccguguguguc.....                        | .....                                                   | 3  | 0 | S03 |
| .....cgugggcuguccgugugugucc.....                       | .....                                                   | 2  | 1 | S03 |
| .....cgugggcuguccgugugugucc.....                       | .....                                                   | 1  | 0 | S03 |
| .....cgugggcuguccguguguguccg.....                      | .....                                                   | 7  | 0 | S03 |
| .....cgugggcuguccgugAguguccg.....                      | .....                                                   | 1  | 1 | S03 |
| .....cgugggcuguccguguguguccgG.....                     | .....                                                   | 1  | 1 | S03 |
| .....gugggcuguccguguguguccg.....                       | .....                                                   | 5  | 0 | S03 |
| .....gugggcuguccguguguguccgc.....                      | .....                                                   | 1  | 0 | S03 |
| .....ggcuguccguguguguccg.....                          | .....                                                   | 1  | 0 | S03 |
| .....gcuguccguguguguccg.....                           | .....                                                   | 1  | 0 | S03 |
| .....ugucUgcguguguccgugugug.....                       | .....                                                   | 1  | 1 | S03 |
| .....uguguccguguguguccg.....                           | .....                                                   | 1  | 0 | S03 |
| .....uguguccguguguguccguc.....                         | .....                                                   | 2  | 0 | S03 |
| .....uguccAuguguguccguc.....                           | .....                                                   | 1  | 1 | S03 |
| .....cguguguguccgucGgcac.....                          | .....                                                   | 1  | 1 | S03 |
| agGacacacaugacgucug.....                               | .....                                                   | 1  | 1 | S04 |

Star

Mature

agcacaacacaugacgucuguggcugucgugucuguccgucagcacacacaggaagcugucgugggucguguguguccguguguccgucgagcaca

|                              |    |   |     |
|------------------------------|----|---|-----|
| ...acacacaugacgucucCuggcuguc | 1  | 1 | S04 |
| ...acacacaugacgucuguggcuguc  | 1  | 0 | S04 |
| ...acacacaugacgucuguggcuguc  | 5  | 0 | S04 |
| ...acacacaugacgucuguggcugucU | 1  | 1 | S04 |
| ...acacacaugacgucugAgggcuguc | 1  | 1 | S04 |
| ...cacacaugacgucugUcu        | 1  | 1 | S04 |
| ...cacacaugacgucugCggcuguc   | 1  | 1 | S04 |
| ...cacacaugacgucuguggcuguc   | 1  | 0 | S04 |
| ...acacaugacgucuguggc        | 1  | 0 | S04 |
| ...acacaugacgucuguggcuguc    | 4  | 0 | S04 |
| ...Gcacaugacgucuguggcuguc    | 1  | 1 | S04 |
| ...acacaCgacgucuguggcuguc    | 4  | 1 | S04 |
| ...acacaugacgucuguggcCguc    | 1  | 1 | S04 |
| ...acacaugacgucuguggcugCc    | 2  | 1 | S04 |
| ...acacaugacgucuguggcugua    | 2  | 1 | S04 |
| ...acacUugacgucuguggcuguc    | 1  | 1 | S04 |
| ...acacaugacgucuguggcucuc    | 1  | 1 | S04 |
| ...acacaugacgucuguggcugucU   | 7  | 1 | S04 |
| ...acacaugacgucAguggcuguc    | 1  | 1 | S04 |
| ...acaUaugacgucuguggcuguc    | 1  | 1 | S04 |
| ...acacaugacgucuguggcuguc    | 41 | 0 | S04 |
| ...acacaCgacgucuguggcugucc   | 1  | 1 | S04 |
| ...acacaugacgucuguggcugucA   | 1  | 1 | S04 |
| ...acacaugacgucuguggcugucc   | 3  | 0 | S04 |
| ...acacaugacgucuguggcuguccg  | 1  | 1 | S04 |
| ...acacaugacgucuguggcuguccg  | 2  | 0 | S04 |
| ...cacaugacgucuguggcuc       | 1  | 0 | S04 |
| ...cacaugacgucugCggcuguc     | 1  | 1 | S04 |
| ...cacaugacgucuguggcugAc     | 1  | 1 | S04 |
| ...cacaugacgucuguggcugucU    | 1  | 1 | S04 |
| ...cacaugacgucuguggcuguc     | 3  | 0 | S04 |
| ...cacaugacgucugAgcugucc     | 1  | 1 | S04 |
| ...cacaugacgucuguggcugucc    | 6  | 0 | S04 |
| ...cacaugacgucuguggcugucA    | 3  | 1 | S04 |
| ...cacacCgacgucuguggcugucc   | 3  | 1 | S04 |
| ...cacaugacgucuguggcugucG    | 1  | 1 | S04 |
| ...cacaugacgucugugCugucc     | 1  | 1 | S04 |
| ...cacaugacgucuguggcugucUcg  | 1  | 1 | S04 |
| ...acaugacgucugugCucuguc     | 1  | 1 | S04 |
| ...acaugacgucuguggcugucG     | 1  | 1 | S04 |
| ...acaugacgucuguggcuguc      | 1  | 1 | S04 |
| ...acaugacgucuguggcugucc     | 1  | 1 | S04 |
| ...acaugacgucuguggcugucc     | 4  | 0 | S04 |
| ...acaugacgucAguggcuguccg    | 1  | 1 | S04 |
| ...acaugacgucuguggcuguccg    | 2  | 0 | S04 |
| ...acaugacgucuguggcucuccgu   | 1  | 1 | S04 |
| ...acaugacgucuguggcuguccgu   | 1  | 0 | S04 |
| ...caugacgucuguggcuguc       | 1  | 1 | S04 |
| ...caugacgucuguggcuguc       | 2  | 0 | S04 |
| ...caugacgucuguggcucucc      | 1  | 1 | S04 |
| ...caugacgucuguggcugucc      | 3  | 0 | S04 |
| ...caugacgucuguggcuguccg     | 2  | 0 | S04 |
| ...caugacgucugugCuguccg      | 1  | 1 | S04 |
| ...caugacgucuguggcuguccgG    | 1  | 1 | S04 |
| ...caugacgucuguggcugucAGu    | 1  | 1 | S04 |
| ...caugacgucugAgggcuguccgu   | 1  | 1 | S04 |
| ...caugacgucuguggcugucGcgu   | 1  | 1 | S04 |
| ...caugacgucAguggcuguccgu    | 1  | 1 | S04 |
| ...caugacgucuguggcucuccgu    | 1  | 1 | S04 |
| ...caugacgucugugUcuguccgu    | 1  | 1 | S04 |
| ...caugacgucuguggcuguccgu    | 8  | 0 | S04 |
| ...caCgacgucuguggcuguccgu    | 1  | 1 | S04 |
| ...caugacgucuguggcuguccgA    | 1  | 1 | S04 |
| ...Aaugacgucuguggcuguccgug   | 1  | 1 | S04 |
| ...caugacgucugugUcuguccgug   | 1  | 1 | S04 |
| ...caugacgucuguggcuguccgug   | 5  | 0 | S04 |
| ...caugacgucuguggcuguccgugC  | 2  | 1 | S04 |
| ...caugacgucugCggcuguccgug   | 1  | 1 | S04 |
| ...caugacgucugGggcuguccgug   | 1  | 1 | S04 |

Star

Mature

|                                 |    |   |     |
|---------------------------------|----|---|-----|
| agcacacacaugaagcugucugggcuguc   | 1  | 0 | S04 |
| .....augacgucugugggcuguc        | 1  | 1 | S04 |
| .....Gugaagcugucugggcuguc       | 1  | 1 | S04 |
| .....augacgucugugggcugucA       | 1  | 0 | S04 |
| .....augacgucugugggcugucc       | 1  | 0 | S04 |
| .....augacgucugugggcuguccg      | 2  | 0 | S04 |
| .....augacgucUaugggcuguccg      | 1  | 1 | S04 |
| .....augacgucugugggcuguccgG     | 1  | 1 | S04 |
| .....augacgAacugggcuguccgu      | 2  | 1 | S04 |
| .....augacgucugugggcuguccgu     | 2  | 0 | S04 |
| .....augacgucuguaAgcuguccgug    | 2  | 1 | S04 |
| .....augacgucuaAugggcuguccgug   | 1  | 1 | S04 |
| .....augacgucugugggcuguccgCg    | 1  | 1 | S04 |
| .....augGcugucugugggcuguccgug   | 1  | 1 | S04 |
| .....augacgucugugggcuguccgug    | 9  | 0 | S04 |
| .....augacgucugugggcuguccgug    | 6  | 0 | S04 |
| .....augacgucugGggcuguccgug     | 1  | 1 | S04 |
| .....augacgucugugggcuguccguCu   | 1  | 1 | S04 |
| .....augacgucugugggcuguccgugA   | 1  | 1 | S04 |
| .....ugaagcugucugggcuguccgA     | 1  | 1 | S04 |
| .....ugaagcugucugggcuguccgG     | 1  | 1 | S04 |
| .....Cgaagcugucugggcugucccgu    | 1  | 1 | S04 |
| .....ugaagcugucugggcugucccgu    | 2  | 0 | S04 |
| .....ugaagcugucugggcuguccgug    | 1  | 0 | S04 |
| .....ugaagcugucugugUcuguccgug   | 1  | 1 | S04 |
| .....ugaagcugucugggcugucUcugug  | 1  | 1 | S04 |
| .....ugaagcugucugggcugucGcugug  | 1  | 1 | S04 |
| .....ugaagcugucugggcuaUccgug    | 1  | 1 | S04 |
| .....uUaagcugucugggcuguccgug    | 1  | 1 | S04 |
| .....ugaagcugucugggcuguccgugA   | 2  | 1 | S04 |
| .....ugaagcugucugggcuguccgugA   | 1  | 1 | S04 |
| .....ugaagcugucugggcuguccgugC   | 1  | 1 | S04 |
| .....ugaagcugucugggcuguccgug    | 15 | 0 | S04 |
| .....gaagcugucugggcugucccgu     | 1  | 0 | S04 |
| .....gaagcugucGggcugucccug      | 1  | 1 | S04 |
| .....gaagcugucugggcugucccug     | 5  | 0 | S04 |
| .....gaagcugucugggcugucccgu     | 16 | 0 | S04 |
| .....gaagcugucugggcugucccugC    | 2  | 1 | S04 |
| .....gaagcugucugggcugucccguU    | 3  | 1 | S04 |
| .....acgucugucugggcugucccga     | 1  | 1 | S04 |
| .....acgucugGggcugucccgu        | 1  | 1 | S04 |
| .....acgucugugggcugucccgu       | 8  | 0 | S04 |
| .....acgucugugggcugucccguU      | 1  | 1 | S04 |
| .....cugucUggcugucccug          | 1  | 1 | S04 |
| .....cugucugGggcugucccug        | 2  | 1 | S04 |
| .....cugucugggcugucccgu         | 2  | 0 | S04 |
| .....cugucugggcucUccgug         | 1  | 1 | S04 |
| .....gucugggcugucccgu           | 1  | 0 | S04 |
| .....gucugGggcugucccgu          | 1  | 1 | S04 |
| .....gucugggcuaUccgugucug       | 1  | 1 | S04 |
| .....ucugggcugucccguUucug       | 1  | 1 | S04 |
| .....ucugggcugucccguugucuguc    | 1  | 0 | S04 |
| .....ucugggcuguaAccgugucuguc    | 1  | 1 | S04 |
| .....ucugggcugucccguUgucuguc    | 1  | 1 | S04 |
| .....cugugggcugucccguugucugU    | 2  | 1 | S04 |
| .....cugugggcugucccguuguaUcc    | 1  | 1 | S04 |
| .....Cgugggcugucccguugucuguc    | 1  | 1 | S04 |
| .....ugugggcugucccguugucuguc    | 1  | 0 | S04 |
| .....ugugggcugucccguugucugAcc   | 1  | 1 | S04 |
| .....ugugggcugucccguugucugccgu  | 1  | 0 | S04 |
| .....ugugggcugucccguugucugccguA | 1  | 1 | S04 |
| .....gugggcugucccguugucugU      | 1  | 1 | S04 |
| .....gugggcugucccguugucugccgu   | 1  | 0 | S04 |
| .....gugggcugucccguugucugUcuguc | 1  | 1 | S04 |
| .....gugggcugucccguugucugUguc   | 1  | 1 | S04 |
| .....ugggcugucccguugucugua      | 1  | 1 | S04 |
| .....ugggcugucccguugucuguccgag  | 1  | 1 | S04 |
| .....Agcugucccguugucuguccg      | 1  | 1 | S04 |
| .....ugucccguugucugucccguagc    | 1  | 0 | S04 |
| .....ugucccguugucugucccguagAAC  | 2  | 1 | S04 |
| .....cgugucugucccguagga         | 1  | 1 | S04 |



Star

Mature

agcacacacaugacgucugugggcuguccgugucugucagcagcacacacagga

|                                        |    |   |     |
|----------------------------------------|----|---|-----|
| .....acguccgugggcuguccgugug.....       | 14 | 0 | S04 |
| .....acguccgugggcuguccgugugG.....      | 3  | 1 | S04 |
| .....acguccgugggcuguccgugGgu.....      | 1  | 1 | S04 |
| .....acguccgugggcuguccguguggu.....     | 54 | 0 | S04 |
| .....acguccgugggcuguccgugugUu.....     | 1  | 1 | S04 |
| .....Ncguccgugggcuguccguguggu.....     | 1  | 1 | S04 |
| .....Gcguccgugggcuguccguguggu.....     | 1  | 1 | S04 |
| .....acguccgCggcuguccguguggu.....      | 1  | 1 | S04 |
| .....acguAcgugggcuguccguguggu.....     | 1  | 1 | S04 |
| .....acguccgugggcuguccgugugA.....      | 5  | 1 | S04 |
| .....acguccgugggcuguccgugugC.....      | 8  | 1 | S04 |
| .....acguccgugggcuguccguguggu.....     | 2  | 0 | S04 |
| .....acguccgugggcuguccguguguggu.....   | 11 | 0 | S04 |
| .....acguccgugggcuguccgugugugucc.....  | 1  | 0 | S04 |
| .....cguccgugggcuguccgugug.....        | 1  | 0 | S04 |
| .....cguccgugggcugAaccgug.....         | 1  | 1 | S04 |
| .....cguccgAaggcuguccgugug.....        | 1  | 1 | S04 |
| .....cguccgugggcuguccgugug.....        | 3  | 0 | S04 |
| .....cguccgugggcuguccgugugA.....       | 1  | 1 | S04 |
| .....cguccgugggcuguccgugug.....        | 4  | 0 | S04 |
| .....cguccgCggcuguccgugug.....         | 1  | 1 | S04 |
| .....cguccgugggcuguccguguggu.....      | 30 | 0 | S04 |
| .....cguccgugggcuguccgugugC.....       | 4  | 1 | S04 |
| .....cguccgugggcuguccgugugA.....       | 3  | 1 | S04 |
| .....cguccgugggcugAaccgugugug.....     | 1  | 1 | S04 |
| .....Gguccgugggcuguccgugugug.....      | 1  | 1 | S04 |
| .....cguccgugggcuguccgugugGg.....      | 1  | 1 | S04 |
| .....cguccgugggcuguccgCgugug.....      | 1  | 1 | S04 |
| .....cguccgugggcuguccgugugug.....      | 87 | 0 | S04 |
| .....cgCccgugggcuguccgugugug.....      | 1  | 1 | S04 |
| .....cguccgAaggcuguccgugugug.....      | 1  | 1 | S04 |
| .....cguccgugggcuguccguguguggu.....    | 6  | 0 | S04 |
| .....cguccgugggcuguccgugugugG.....     | 1  | 1 | S04 |
| .....cguAcgugggcuguccguguguguc.....    | 1  | 1 | S04 |
| .....cguccgugggcuguccguguguguc.....    | 11 | 0 | S04 |
| .....cguccgugggcuguccgugugugua.....    | 1  | 1 | S04 |
| .....guccgugggcuguccgugug.....         | 1  | 0 | S04 |
| .....guccgugggcuguccgugug.....         | 5  | 0 | S04 |
| .....guccgugggcuguccgugug.....         | 5  | 0 | S04 |
| .....guccgugggcuguccgugugC.....        | 2  | 1 | S04 |
| .....guccgugggcuguccgugugug.....       | 14 | 0 | S04 |
| .....guccgugggcuguccgugugCugugug.....  | 2  | 1 | S04 |
| .....guccgugggcuguccguguguggu.....     | 22 | 0 | S04 |
| .....guccgugggcuguccgugugGgu.....      | 1  | 1 | S04 |
| .....guccgugggcuguccgugugugA.....      | 3  | 1 | S04 |
| .....guccgAaggcuguccguguguguc.....     | 1  | 1 | S04 |
| .....guccgugggcuguccguguguguc.....     | 5  | 0 | S04 |
| .....guccgugggcuguccguguguguc.....     | 1  | 1 | S04 |
| .....guccgugggcuguccgugugugucc.....    | 5  | 0 | S04 |
| .....guccgugggcuguccgugugugugG.....    | 1  | 1 | S04 |
| .....uccgugggcuguccgugug.....          | 2  | 0 | S04 |
| .....uccgugggcuguccgugugC.....         | 2  | 1 | S04 |
| .....uccgugggcuguccguguggu.....        | 4  | 0 | S04 |
| .....uccgugggcuguccgugugug.....        | 11 | 0 | S04 |
| .....uccgugggcuguccgugugCg.....        | 1  | 1 | S04 |
| .....uccgugggcuguccguguguggu.....      | 14 | 0 | S04 |
| .....uccgugggcuguccgugugAgu.....       | 1  | 1 | S04 |
| .....uccgugggcuguccgugugCugugug.....   | 1  | 1 | S04 |
| .....uccgugggcuguccgugugugA.....       | 1  | 1 | S04 |
| .....uccgugggcuguccguguguguc.....      | 1  | 1 | S04 |
| .....uccgugggcuguccgugugugGguc.....    | 3  | 1 | S04 |
| .....uAcgugggcuguccguguguguc.....      | 3  | 1 | S04 |
| .....uccgugggcuguccguguguguc.....      | 70 | 0 | S04 |
| .....uccgugggcuguccguguguguc.....      | 1  | 1 | S04 |
| .....uccgugggcuguccgugugCuguguguc..... | 2  | 1 | S04 |
| .....uccgugggcuguccgugugugucc.....     | 7  | 0 | S04 |
| .....uccgugggcuguccgugugugugG.....     | 1  | 1 | S04 |
| .....uccgugggcugAaccgugugugucc.....    | 1  | 1 | S04 |
| .....uccgugggcuguccgCguguguccg.....    | 1  | 1 | S04 |
| .....uccgugggcuguccguguguguccg.....    | 10 | 0 | S04 |





Star

Mature

|                                                                                                           |   |   |     |
|-----------------------------------------------------------------------------------------------------------|---|---|-----|
| agcacaacaugaagucuguggcuguccgugucuguccgucagcacacacaggaaguccgugggcuguccgugugugucegcguguguceguguguccgucgcaca |   |   |     |
| .....uguguceguguguguccgucG....                                                                            | 1 | 1 | S04 |
| .....uguguceguguguguccgucg....                                                                            | 1 | 0 | S04 |
| .....uguceguguguguccgucgUa..                                                                              | 1 | 1 | S04 |
| .....cguguguguccgucGgca..                                                                                 | 1 | 1 | S04 |
| .....cguguguguccgucgAaca                                                                                  | 1 | 1 | S04 |

Provisional ID : chrAnn\_random\_3153785  
 Score total : 0  
 Score for star read(s) : -1.3  
 Score for read counts : 0  
 Score for mfe : 1.2  
 Score for randfold : 0  
 Score for cons. seed :  
 Total read count : 23  
 Mature read count : 23  
 Loop read count : 0  
 Star read count : 0

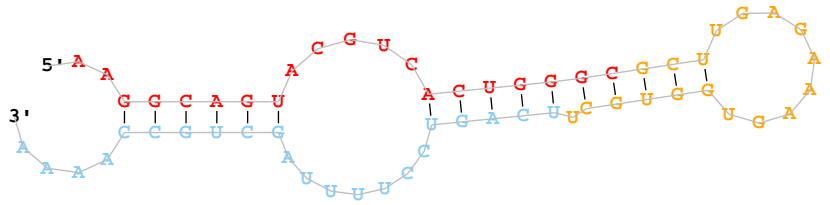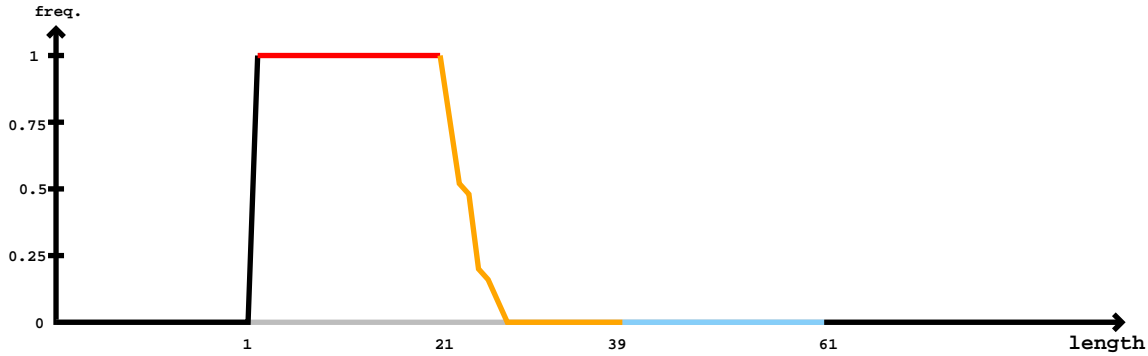

**Mature**

**Star**

| 5' -                                                                                                                                                 | 3' | exp | reads | mm | sample |
|------------------------------------------------------------------------------------------------------------------------------------------------------|----|-----|-------|----|--------|
| uaauuuuauucgaguugauacaaggcag <u>ua</u> cgucacugggc <u>gc</u> cuugagaaaguggugcuucaguc <u>ccuuu</u> agcugc <u>caaaa</u> uagacgggagcacuaaugcuuucguuugcc |    |     |       |    |        |
| .....((((.....))).....((((.....((((((((.....)))))).....)))).....)))).....((((.....((((.....)))).....)))).....                                        |    |     | 2     | 0  | S03    |
| .....aaggcag <u>ua</u> cgucacugggc.....                                                                                                              |    |     | 3     | 0  | S03    |
| .....aaggcag <u>ua</u> cgucacugggcgc.....                                                                                                            |    |     |       |    |        |
| .....aaggcag <u>ua</u> cgucacugggU.....                                                                                                              |    |     | 1     | 1  | S04    |
| .....aaggcag <u>ua</u> cgucacugggc.....                                                                                                              |    |     | 9     | 0  | S04    |
| .....aaggcag <u>ua</u> cgucacugggcgc.....                                                                                                            |    |     | 1     | 0  | S04    |
| .....aGggcag <u>ua</u> cgucacugggcgc.....                                                                                                            |    |     | 1     | 1  | S04    |
| .....aaggcag <u>ua</u> cgucacugggcgc.....                                                                                                            |    |     | 2     | 0  | S04    |
| .....aaggcag <u>ua</u> cgucacugggcgcG.....                                                                                                           |    |     | 1     | 1  | S04    |
| .....aaggcag <u>ua</u> cgCcacugggcgcuu.....                                                                                                          |    |     | 1     | 1  | S04    |
| .....aaggcag <u>ua</u> cgucacugggcgcuuA.....                                                                                                         |    |     | 1     | 1  | S04    |
| .....aaggcag <u>ua</u> cgucacugggcgc <u>uug</u> .....                                                                                                |    |     | 1     | 0  | S04    |
| .....aaggcag <u>ua</u> cgucacugggcgc <u>uuga</u> .....                                                                                               |    |     | 2     | 0  | S04    |







Star

Mature

|                                                                                 |   |   |     |
|---------------------------------------------------------------------------------|---|---|-----|
| uauuauugcaugcaaccaggauccguaguccagacuaccuacucuuuggggaggagaggucggcuguucgacucgcgga |   |   |     |
| .....gaggucggcuguucgaAu.....                                                    | 1 | 1 | S04 |
| .....gaggucggcuguucgacA.....                                                    | 4 | 1 | S04 |
| .....gaggAcggcuguucgacu.....                                                    | 1 | 1 | S04 |
| .....gaggucggcuguucgacuU.....                                                   | 3 | 1 | S04 |
| .....gaggucggcuguucgacucA.....                                                  | 1 | 1 | S04 |
| .....gaggucggcuguucgacucU.....                                                  | 1 | 1 | S04 |
| .....gaggucggcuguucgacucAc.....                                                 | 1 | 1 | S04 |
| .....gaggucggcuguucgacucgcU.....                                                | 2 | 1 | S04 |
| .....gaggucggcuguucgacucgGgg.....                                               | 1 | 1 | S04 |
| .....gaggucggcuguucgacucgcggC.....                                              | 1 | 1 | S04 |
| .....gaggucggcuguucgacucgcgga.....                                              | 6 | 0 | S04 |
| .....gaggucggcuguucgacucgcggU.....                                              | 3 | 1 | S04 |
| .....aggucggcuguucgacucgcgC.....                                                | 1 | 1 | S04 |
| .....aggucggcuguucgacucgcgga.....                                               | 1 | 0 | S04 |
| .....ucggcuguucgacucgcggaga.....                                                | 1 | 0 | S04 |
| .....ucggcuguucgacucgcggagagg.....                                              | 1 | 0 | S04 |
| .....cggcuguucgacucgcggaA.....                                                  | 1 | 1 | S04 |
| .....cgAcuguucgacucgcggaga.....                                                 | 1 | 1 | S04 |
| .....cggcuguucgacucgcggagag.....                                                | 1 | 0 | S04 |
| .....cggcuguucgacucgcggagaAagg.....                                             | 1 | 1 | S04 |
| .....cgacucgcggagagggggaggcgU.....                                              | 1 | 0 | S04 |
| .....gacucgcggagagggggaggcgug.....                                              | 1 | 0 | S04 |
| .....acucgcggagagggggaggcgugA.....                                              | 1 | 1 | S04 |







Mature

Star

uuuccucggaauuccgucgguauauuccggggaauucccgaggaaccaaaauuuguguuuucccggaauuccucggaauuccucgaggauuucuuuuu

|                                    |    |   |     |
|------------------------------------|----|---|-----|
| .....guuucccggaaauuccucg.....      | 10 | 0 | S03 |
| .....guuucccggGauuuccucg.....      | 1  | 1 | S03 |
| .....guuucccggaaauuccucgg.....     | 8  | 0 | S03 |
| .....guuucccggaaauuccucggC.....    | 2  | 1 | S03 |
| .....guuucccggaaauuccucgga.....    | 3  | 0 | S03 |
| .....guuucccggaaauuccucggaa.....   | 1  | 0 | S03 |
| .....uuucccggaaauuccuc.....        | 2  | 0 | S03 |
| .....uuucccggaaauuccucg.....       | 3  | 0 | S03 |
| .....uucccggaaauuccucg.....        | 5  | 0 | S03 |
| .....ucccggaaauuccucggaa.....      | 1  | 0 | S03 |
| .....ucccggaaauuccucggaaauu.....   | 1  | 0 | S03 |
| .....ccucggaaauuccucgga.....       | 7  | 0 | S03 |
| .....ccucggaaauuccucggaa.....      | 1  | 0 | S03 |
| .....ccucggaaauuccucggaaa.....     | 1  | 0 | S03 |
| .....ccucggaaauuccucggaaau.....    | 1  | 0 | S03 |
| .....cucggaaauuccucggaa.....       | 7  | 0 | S03 |
| .....cucggaaauuccucggaaa.....      | 3  | 0 | S03 |
| .....cucggaaauuccucggaaC.....      | 1  | 1 | S03 |
| .....cucggaaauuccucggaaau.....     | 2  | 0 | S03 |
| .....aaAuucccggaaauuccucg.....     | 1  | 1 | S03 |
| .....aaauucccggaaUuuccucggga.....  | 1  | 1 | S03 |
| .....aaauucccggaaauuccucggga.....  | 2  | 0 | S03 |
| .....aaauucccggaaauuccucgggG.....  | 1  | 1 | S03 |
| .....aaauucccggaaauuccucgg.....    | 1  | 0 | S03 |
| .....aaauucccggaaauuccucggg.....   | 2  | 0 | S03 |
| .....aAuucccggaaauuccucggg.....    | 1  | 1 | S03 |
| .....uuucccggaaauuccuc.....        | 1  | 0 | S03 |
| .....uuucccggaaauuccucg.....       | 1  | 0 | S03 |
| .....uuucccggaaauuccucggg.....     | 1  | 0 | S03 |
| .....uucccggaaauuccucggg.....      | 1  | 0 | S03 |
| .....uucccggaaauuccucgggau.....    | 1  | 0 | S03 |
| .....ccucggaaauuccucggg.....       | 1  | 0 | S03 |
| .....ccucggaaauuccucgggau.....     | 1  | 0 | S03 |
| uuucccggaaauuccucg.....            | 1  | 0 | S04 |
| uuucccggaaauuccgucgggu.....        | 4  | 0 | S04 |
| uuucccggaaauuccgucgguaa.....       | 2  | 0 | S04 |
| ..uucccggaaauuccgucggua.....       | 1  | 0 | S04 |
| ..uucccggaaauuccgucgguaaG.....     | 4  | 1 | S04 |
| ..uucccggaaauuccgucgguaa.....      | 1  | 0 | S04 |
| ..uucccggaaauuccgucgguaau.....     | 1  | 0 | S04 |
| ..ucccggaaauuccgucgggu.....        | 1  | 0 | S04 |
| ..ucccggaaauuccgucggua.....        | 1  | 0 | S04 |
| ..uucccggaaauuccgucgguaauu.....    | 4  | 0 | S04 |
| ..ucAuucccggaaauuccgucgguaauu..... | 1  | 1 | S04 |
| ..ccucggaaauuccgucgguaauu.....     | 3  | 0 | S04 |
| ..ccucggaaauuccgucgguaauuuc.....   | 19 | 0 | S04 |
| ..cucggaaauuccgucggua.....         | 6  | 0 | S04 |
| ..cucggaaauuccgucgguaa.....        | 1  | 0 | S04 |
| ..cucggaaauuccgucgguaau.....       | 3  | 0 | S04 |
| ..cucggGauuccgucgguaauu.....       | 1  | 1 | S04 |
| ..cucggaaauuccgucgguaauu.....      | 60 | 0 | S04 |
| ..cucggaaauuccgucgguaauuuc.....    | 23 | 0 | S04 |
| ..cucggaaauuccgucgguaauuG.....     | 1  | 1 | S04 |
| ..Nucggaaauuccgucgguaauuucc.....   | 1  | 1 | S04 |
| ..cucggaaauuccgucgguaauuucc.....   | 29 | 0 | S04 |
| ..ucggaaauuccgucggua.....          | 2  | 0 | S04 |
| ..ucggaaauuccgucgguaa.....         | 4  | 0 | S04 |
| ..ucggaaauuccgucgguaGa.....        | 1  | 1 | S04 |
| ..ucggaaauuccgucgguaau.....        | 2  | 0 | S04 |
| ..ucggaaauuccgucgguaauu.....       | 30 | 0 | S04 |
| ..ucggaaauuccgucgguaauuuc.....     | 85 | 0 | S04 |
| ..Ncggaaauuccgucgguaauuuc.....     | 1  | 1 | S04 |
| ..ucggaaauuccgGcgguaauuuc.....     | 1  | 1 | S04 |
| ..cgaaauuccgucgguaa.....           | 1  | 0 | S04 |
| ..cgaaauuccgucgguaau.....          | 1  | 0 | S04 |
| ..cgaaauuccgucgguaauu.....         | 8  | 0 | S04 |
| ..cgaaauuccgucgguaauuuc.....       | 23 | 0 | S04 |
| ..cgaaauuccgucgguaauuG.....        | 1  | 1 | S04 |
| ..cgaaauuccgucgguaauuucc.....      | 3  | 0 | S04 |

Mature

Star

| Sequence                                                                                         | Mature Count | Star Count | Category |
|--------------------------------------------------------------------------------------------------|--------------|------------|----------|
| uuucccggaauuccgucgguaauauuccggggaauucccgaggaaccaaaauuuguguuucccggaauucccggaauucccgaggauuccauuuua | 1            | 1          | S04      |
| .cggaauuccgucgguaauauuccC                                                                        | 1            | 0          | S04      |
| .cggaauuccgucgguaauauuccg                                                                        | 1            | 0          | S04      |
| .ggaauuccgucgguaauu                                                                              | 1            | 0          | S04      |
| .ggaauuccgucgguaauu                                                                              | 13           | 0          | S04      |
| .ggaauuccgucgguaauuucc                                                                           | 5            | 0          | S04      |
| .ggaauuccgucgguaauauuccg                                                                         | 1            | 0          | S04      |
| .ggaauuccgucgguaauauuccgg                                                                        | 1            | 0          | S04      |
| .gaauccgucgguaauu                                                                                | 1            | 0          | S04      |
| .gaauccgucgguaauuucc                                                                             | 9            | 0          | S04      |
| .gaauccgucgguaauuucc                                                                             | 13           | 0          | S04      |
| .gaauccgucgguaauuuccg                                                                            | 74           | 0          | S04      |
| .gUauuccgucgguaauuuccg                                                                           | 1            | 1          | S04      |
| .gaauccgucgguaauuuccgg                                                                           | 2            | 0          | S04      |
| .aauccgucgguaauuucc                                                                              | 2            | 0          | S04      |
| .aauccgucgguaauuucc                                                                              | 16           | 0          | S04      |
| .Nauuccgucgguaauuuccg                                                                            | 1            | 1          | S04      |
| .aauccgGcgguaauuuccg                                                                             | 1            | 1          | S04      |
| .aauccgucgguaauuuccC                                                                             | 1            | 1          | S04      |
| .aauccgucgguaauuuccg                                                                             | 21           | 0          | S04      |
| .aauccgucgguaauuuccAg                                                                            | 1            | 1          | S04      |
| .aauccgucgguaauuuccgg                                                                            | 1            | 0          | S04      |
| .auucGgucgguaauuucc                                                                              | 1            | 1          | S04      |
| .auuccgucgguaauuucc                                                                              | 9            | 0          | S04      |
| .auuccgucgguaauuuccg                                                                             | 12           | 0          | S04      |
| .auuccgucgguaauuUcgg                                                                             | 1            | 1          | S04      |
| .auuccgucgguaauuuccgC                                                                            | 1            | 1          | S04      |
| .auuccgucgguaauuuccAg                                                                            | 1            | 1          | S04      |
| .auuccgucgguaauuuccggA                                                                           | 1            | 1          | S04      |
| .uuccgucgguaauuuccg                                                                              | 2            | 0          | S04      |
| .uccgucgguaauuUcgg                                                                               | 1            | 1          | S04      |
| .uccgucgguaauuuccggUa                                                                            | 1            | 1          | S04      |
| .ccgucgguaauuuccggUa                                                                             | 1            | 1          | S04      |
| .uauauuccggggaauuccgaC                                                                           | 1            | 1          | S04      |
| .ggggaauuccgaggaacC                                                                              | 1            | 1          | S04      |
| .ggggaauuccgaggaacA                                                                              | 1            | 1          | S04      |
| .aauccgaggaacccaaaauuugU                                                                         | 9            | 0          | S04      |
| .aauccgaggaacccaaaauuugC                                                                         | 2            | 1          | S04      |
| .auuccgaggaacccaaaauuugCg                                                                        | 1            | 1          | S04      |
| .auuccgaggaacccaaaauuug                                                                          | 9            | 0          | S04      |
| .uuccgaggaacccaaaauuugU                                                                          | 1            | 1          | S04      |
| .uccgaggaacccaaaauuug                                                                            | 1            | 0          | S04      |
| .ccgaggaacccaaaauuugugu                                                                          | 1            | 0          | S04      |
| .cgaggaacccaaaauuugugu                                                                           | 1            | 0          | S04      |
| .ccaaaauuuguguuucccggaag                                                                         | 1            | 1          | S04      |
| .ccaaaauuuguguuucccggaau                                                                         | 1            | 0          | S04      |
| .auuuuguguuucccggaau                                                                             | 1            | 0          | S04      |
| .auuuuguguuucccggaauu                                                                            | 3            | 0          | S04      |
| .auuuuguguuucccggaauuu                                                                           | 1            | 0          | S04      |
| .auuuuguguuucccggaauuucc                                                                         | 1            | 0          | S04      |
| .Uuuuuguguuucccggaauuucc                                                                         | 1            | 1          | S04      |
| .uuuuguguuucccggaau                                                                              | 1            | 0          | S04      |
| .uuuuguguuucccggaauuucc                                                                          | 3            | 0          | S04      |
| .uuuuguguuucccggaauuuccC                                                                         | 1            | 1          | S04      |
| .uuuuguguuucccggaauuuccu                                                                         | 3            | 0          | S04      |
| .uuuuguguuucccggaauuuccu                                                                         | 1            | 0          | S04      |
| .uuuuguguuucccggaauuuccuA                                                                        | 1            | 1          | S04      |
| .uuuuguguuucccggaauuuccuc                                                                        | 8            | 0          | S04      |
| .uuguguuucccggaauuuccu                                                                           | 1            | 0          | S04      |
| .uuguguuucccggaauuuccuc                                                                          | 6            | 0          | S04      |
| .uuguguuucccggaauuucccg                                                                          | 2            | 0          | S04      |
| .uugCguuucccggaauuucccg                                                                          | 1            | 1          | S04      |
| .Guguguuucccggaauuucccg                                                                          | 2            | 1          | S04      |
| .uguguuucccggaauuuccu                                                                            | 1            | 0          | S04      |
| .uguguuucccggaauuuccuc                                                                           | 15           | 0          | S04      |
| .Aguguuucccggaauuucccg                                                                           | 1            | 1          | S04      |
| .uguguuucccggaauuucccg                                                                           | 4            | 0          | S04      |
| .uguguuucccggaauuucccU                                                                           | 1            | 1          | S04      |
| .uguguuucccggaauuucccgg                                                                          | 30           | 0          | S04      |
| .ugugUuucccggaauuucccgg                                                                          | 1            | 1          | S04      |
| .ugCguuucccggaauuucccgg                                                                          | 2            | 1          | S04      |



Provisional ID : chrC01\_988803  
 Score total : 1.4  
 Score for star read(s) : -1.3  
 Score for read counts : 0  
 Score for mfe : 2.7  
 Score for randfold : 0  
 Score for cons. seed :  
 Total read count : 15  
 Mature read count : 6  
 Loop read count : 9  
 Star read count : 0

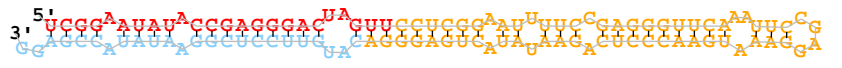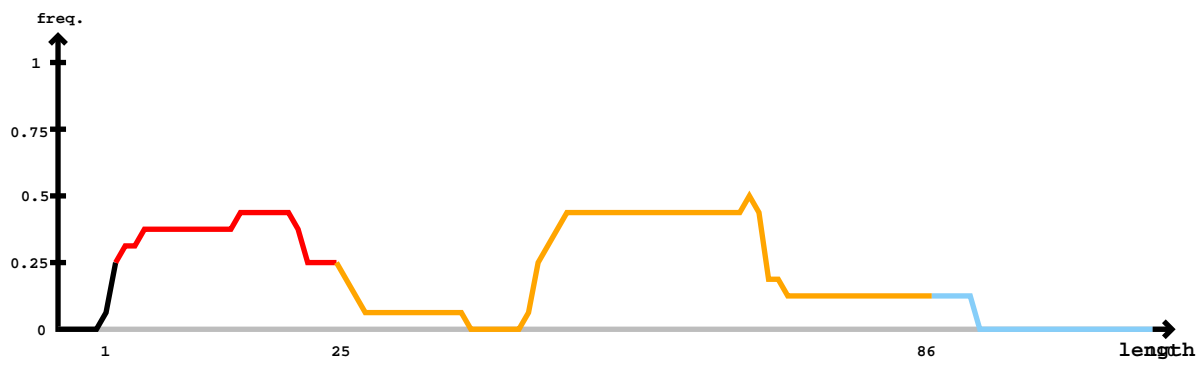

**Mature**

**Star**

| 5' -                                                                                                       | -3' | exp | reads | mm | sample |
|------------------------------------------------------------------------------------------------------------|-----|-----|-------|----|--------|
| accucggaaauaccgagggacuaguucucggaauuuuccgaggguucaaaauccgagggaaugaaccucagaauaacugaggggauguuccucggaauaacgaggg |     |     |       |    |        |
| .....ucaaauuccgagggaaaugaaccA.....                                                                         |     |     | 1     | 1  | S03    |
| .....uAaaauuccgagggaaaugaaccu.....                                                                         |     |     | 1     | 1  | S03    |
| .....cucagaauaacugagggacaugu.....                                                                          |     |     | 1     | 0  | S03    |
| ...Uucggaauaacgagggacu.....                                                                                |     |     | 1     | 1  | S04    |
| ...ucggaauaacgagggacu.....                                                                                 |     |     | 1     | 0  | S04    |
| ...ucggaauaacgagggacuagu.....                                                                              |     |     | 2     | 0  | S04    |
| ...cggaaauCccgaggac.....                                                                                   |     |     | 1     | 1  | S04    |
| ...gaaauaGcgagggacuaguucc.....                                                                             |     |     | 1     | 1  | S04    |
| .....aggacuaguuccggaauuuc.....                                                                             |     |     | 1     | 0  | S04    |
| .....uucaaaauccgagggaaaugaacc.....                                                                         |     |     | 1     | 0  | S04    |
| .....ucaaaauccgagggaaaugaaccu.....                                                                         |     |     | 1     | 0  | S04    |
| .....cGaaauccgagggaaaugaacc.....                                                                           |     |     | 1     | 1  | S04    |
| .....aaaauccgagggaaaugaaccA.....                                                                           |     |     | 1     | 1  | S04    |
| .....aauuccAaggaaaugaaccuca.....                                                                           |     |     | 1     | 1  | S04    |
| .....cucGgaauaacugagggacaugu.....                                                                          |     |     | 1     | 1  | S04    |

Provisional ID : chrC01\_990042  
 Score total : 1.5  
 Score for star read(s) : -1.3  
 Score for read counts : 0  
 Score for mfe : 2.8  
 Score for randfold : 0  
 Score for cons. seed :  
 Total read count : 174  
 Mature read count : 131  
 Loop read count : 7  
 Star read count : 36

3' 5' AUCCGACUCUUAACUUUUAACUGAAAAAGUUUAAAAGUCGGCUCUUUAAAUAAG  
 UCGGGCUCGAGAAUUGAAAAUUGACUUUUUCAAUUUUUCACCCACGAAUUUAUAAG

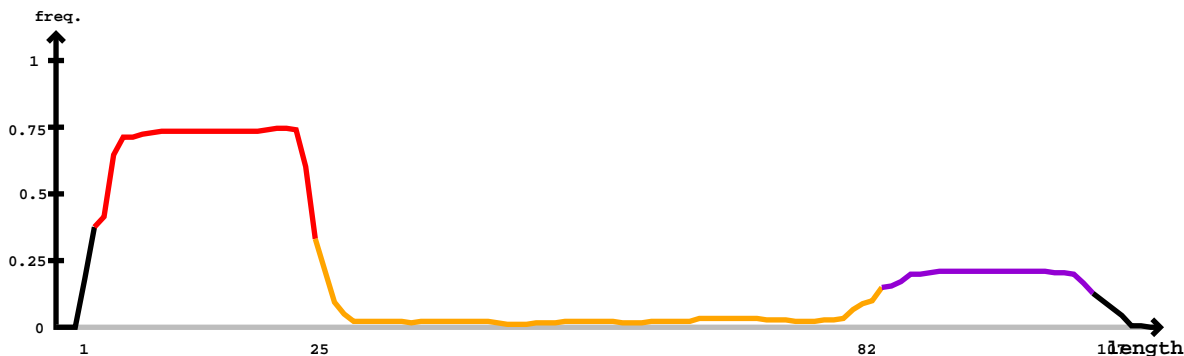

**Mature**

**Star**

| 5' -                                                                                                                                                                        | reads | mm | sample |
|-----------------------------------------------------------------------------------------------------------------------------------------------------------------------------|-------|----|--------|
| aa <u>auccgacucuu</u> aacuuuaacuga <u>aaaa</u> guuaaaagucggcucuuaaa <u>ua</u> aga <u>uu</u> uaaga <u>ccgacuuuu</u> aacuuuuu <u>ca</u> guuaaaaguu <u>aagagucgggu</u> ucuuauu | 6     | 0  | S03    |
| aa <u>auccgacucuu</u> aacuuuaacuga <u>aaaa</u> guuaaaagucggcucuuaaa <u>ua</u> aga <u>uu</u> uaaga <u>ccgacuuuu</u> aacuuuuu <u>ca</u> guuaaaaguu <u>aagagucgggu</u> ucuuauu | 1     | 1  | S03    |
| .aa <u>auccgacucuu</u> aacuuuaacug.....                                                                                                                                     | 2     | 0  | S03    |
| . <u>auccgacucuu</u> aacuuuaacu.....                                                                                                                                        | 2     | 0  | S03    |
| . <u>auccgacucuu</u> aacuuuaacug.....                                                                                                                                       | 1     | 0  | S03    |
| . <u>auccgacucuu</u> aacuuuaacugG.....                                                                                                                                      | 2     | 1  | S03    |
| . <u>auccgacucuu</u> aacuuuaacuga.....                                                                                                                                      | 2     | 0  | S03    |
| . <u>uccgacucuu</u> aacuuuaacug.....                                                                                                                                        | 1     | 0  | S03    |
| . <u>uccgacucuu</u> aacuuuaacuga.....                                                                                                                                       | 1     | 0  | S03    |
| . <u>ccgacucuu</u> aacuuuaacu.....                                                                                                                                          | 2     | 0  | S03    |
| . <u>ccgacucuu</u> aacuuuaacug.....                                                                                                                                         | 8     | 0  | S03    |
| . <u>ccgacucuu</u> aacuuuaacugaG.....                                                                                                                                       | 1     | 1  | S03    |
| . <u>ccgacucuu</u> aacuuuaacugaa.....                                                                                                                                       | 3     | 0  | S03    |
| . <u>cgacucuu</u> aacuuuaacC.....                                                                                                                                           | 1     | 1  | S03    |
| . <u>cgacucuu</u> aacuuuaacuga.....                                                                                                                                         | 2     | 0  | S03    |
| . <u>cgacucuu</u> aacuuuaacugaa.....                                                                                                                                        | 2     | 0  | S03    |
| . <u>cgacucuu</u> aacuuuaacugaaaa.....                                                                                                                                      | 1     | 0  | S03    |
| . <u>acucuu</u> aacuuuaacugaaaa.....                                                                                                                                        | 1     | 0  | S03    |
| . <u>Nucuu</u> aacuuuaacugaaaa.....                                                                                                                                         | 1     | 1  | S03    |
| . <u>ucuu</u> aacuuuaacugaaaaaguu.....                                                                                                                                      | 1     | 0  | S03    |
| . <u>acug</u> aaaaaguuuaaagucggcuU.....                                                                                                                                     | 1     | 1  | S03    |
| . <u>aaga</u> Gauuuuaaga <u>ccgacuuuu</u> .....                                                                                                                             | 1     | 1  | S03    |
| . <u>ucagu</u> uaaaaguu <u>aagagucgggu</u> .....                                                                                                                            | 2     | 0  | S03    |
| . <u>cagu</u> uaaaaguu <u>aagagucgggu</u> .....                                                                                                                             | 1     | 1  | S03    |
| . <u>cagu</u> uaaaaguu <u>aagagucgggu</u> .....                                                                                                                             | 3     | 0  | S03    |
| . <u>agu</u> uaaaaguu <u>aagagucgggu</u> .....                                                                                                                              | 1     | 0  | S03    |
| . <u>agu</u> uaaaaguu <u>aagagucgggu</u> A.....                                                                                                                             | 1     | 1  | S03    |
| . <u>gu</u> uaaaaguu <u>aagagucgggu</u> cG.....                                                                                                                             | 1     | 1  | S03    |
| . <u>gu</u> uaaaaguu <u>aagagucgggu</u> cu.....                                                                                                                             | 3     | 0  | S03    |
| . <u>uaaa</u> guuaaagagucgggu <u>ucuu</u> .....                                                                                                                             | 1     | 0  | S03    |
| . <u>aaa</u> guuaaagagucgggu <u>ucG</u> .....                                                                                                                               | 1     | 1  | S03    |
| . <u>aaa</u> guuaaagagucgggu <u>ucuu</u> .....                                                                                                                              | 1     | 0  | S03    |
| . <u>aaa</u> guuaaagagucgggu <u>uuAuu</u> .....                                                                                                                             | 1     | 1  | S03    |

Mature

Star

|                                                                                                                                                                                                                |    |   |     |
|----------------------------------------------------------------------------------------------------------------------------------------------------------------------------------------------------------------|----|---|-----|
| aa <u>auc</u> gcacucuaacuuuu <u>aac</u> gaaaaaguu <u>aaa</u> gucggcucua <u>aaa</u> uaagaa <u>uuu</u> aaagaa <u>ccg</u> acuuuu <u>aac</u> uuuu <u>ca</u> guuu <u>aa</u> aguu <u>aag</u> agucgggu <u>uc</u> uuau |    |   |     |
| .....aaguu <u>aag</u> agucgggu <u>uc</u> uaa...                                                                                                                                                                | 1  | 0 | S03 |
| .....aaguu <u>aag</u> agucgggu <u>uc</u> uu <u>a</u> ...                                                                                                                                                       | 1  | 0 | S03 |
| .....aguu <u>aag</u> agucgggu <u>uc</u> C.....                                                                                                                                                                 | 1  | 1 | S03 |
| <u>.aa</u> ucgcacucuaacuuuu <u>aac</u> .....                                                                                                                                                                   | 1  | 0 | S04 |
| <u>.aa</u> ucgcacucuaacuuuu <u>aac</u> U.....                                                                                                                                                                  | 6  | 0 | S04 |
| <u>.aa</u> ucgcacucuaacuuuu <u>aac</u> A.....                                                                                                                                                                  | 1  | 1 | S04 |
| <u>.aa</u> ucgcacucuaacuuuu <u>aac</u> G.....                                                                                                                                                                  | 1  | 1 | S04 |
| <u>.aa</u> ucgcacucCuaacuuuu <u>aac</u> U.....                                                                                                                                                                 | 1  | 1 | S04 |
| <u>.aa</u> ucgcacucuaacuuuu <u>aac</u> g.....                                                                                                                                                                  | 1  | 1 | S04 |
| <u>.aa</u> ucgcacucuaacuuuu <u>aac</u> g.....                                                                                                                                                                  | 12 | 0 | S04 |
| <u>.aa</u> ucgcacucuaacuuuu <u>aac</u> gA.....                                                                                                                                                                 | 1  | 0 | S04 |
| <u>.a</u> ucgcacucuaacuuuu <u>aac</u> G.....                                                                                                                                                                   | 1  | 1 | S04 |
| <u>.a</u> ucgcacucuaacuuuu <u>aac</u> U.....                                                                                                                                                                   | 1  | 1 | S04 |
| <u>.a</u> ucgcacucuaacuuuu <u>aac</u> g.....                                                                                                                                                                   | 3  | 0 | S04 |
| <u>.a</u> ucgcGcucuaacuuuu <u>aac</u> g.....                                                                                                                                                                   | 1  | 1 | S04 |
| <u>.a</u> ucgcacucCaaacuuuu <u>aac</u> g.....                                                                                                                                                                  | 1  | 1 | S04 |
| <u>.a</u> ucgcacucuaacuuuu <u>aac</u> gG.....                                                                                                                                                                  | 2  | 1 | S04 |
| <u>.a</u> ucgcacucuaacuuuu <u>aac</u> gA.....                                                                                                                                                                  | 19 | 0 | S04 |
| <u>.u</u> ccgcacucuaacuuuu <u>aac</u> U.....                                                                                                                                                                   | 2  | 0 | S04 |
| <u>.u</u> ccgcacucuaacuuuu <u>aac</u> gA.....                                                                                                                                                                  | 1  | 0 | S04 |
| <u>.u</u> ccgcacucuaacuuuu <u>aac</u> gaa.....                                                                                                                                                                 | 2  | 0 | S04 |
| <u>.c</u> cgacucuaacuuuu <u>aac</u> U.....                                                                                                                                                                     | 1  | 0 | S04 |
| <u>.c</u> cgacucCuaacuuuu <u>aac</u> g.....                                                                                                                                                                    | 1  | 1 | S04 |
| <u>.c</u> cgacucuaacuuuu <u>aac</u> g.....                                                                                                                                                                     | 14 | 0 | S04 |
| <u>.c</u> cgacuuUaacuuuu <u>aac</u> g.....                                                                                                                                                                     | 1  | 1 | S04 |
| <u>.c</u> cgacucuaacuuC <u>aac</u> g.....                                                                                                                                                                      | 1  | 1 | S04 |
| <u>.c</u> cgacucuaacuu <u>aac</u> gA.....                                                                                                                                                                      | 2  | 0 | S04 |
| <u>.c</u> Ugacucuaacuuuu <u>aac</u> gaaa.....                                                                                                                                                                  | 1  | 1 | S04 |
| <u>.c</u> cgacucuaacuuuu <u>aac</u> gaaa.....                                                                                                                                                                  | 6  | 0 | S04 |
| <u>.c</u> cgacucuaacuu <u>aac</u> gaaaa.....                                                                                                                                                                   | 1  | 0 | S04 |
| <u>.c</u> gacucuaacuuuu <u>aac</u> g.....                                                                                                                                                                      | 1  | 0 | S04 |
| <u>.c</u> gacucuaacuuuu <u>aac</u> gA.....                                                                                                                                                                     | 3  | 0 | S04 |
| <u>.c</u> gacucuaacuu <u>aac</u> gaaaa.....                                                                                                                                                                    | 1  | 0 | S04 |
| <u>.c</u> gacucuaacuuuu <u>aac</u> gaaaaaguu <u>a</u> .....                                                                                                                                                    | 1  | 0 | S04 |
| <u>.a</u> cucuaacuuuu <u>aac</u> gaaa.....                                                                                                                                                                     | 1  | 0 | S04 |
| <u>.a</u> acgaaaaaguu <u>aaa</u> gucggc.....                                                                                                                                                                   | 1  | 1 | S04 |
| <u>.a</u> aaagucggcucuu <u>aaa</u> uaagaaa.....                                                                                                                                                                | 1  | 0 | S04 |
| <u>.a</u> gucggcucuu <u>aaa</u> uaagaa <u>uuu</u> .....                                                                                                                                                        | 1  | 0 | S04 |
| <u>.a</u> uaagaGauuu <u>aag</u> aacgcacuu.....                                                                                                                                                                 | 1  | 1 | S04 |
| <u>.a</u> gaaccgcacuuuu <u>aac</u> uuuu <u>uc</u> .....                                                                                                                                                        | 1  | 0 | S04 |
| <u>.a</u> gaaccgcacuuuu <u>aac</u> uuuu <u>ca</u> .....                                                                                                                                                        | 1  | 0 | S04 |
| <u>.c</u> cgacuuuu <u>aac</u> uuuu <u>ca</u> C.....                                                                                                                                                            | 1  | 1 | S04 |
| <u>.c</u> cgacuuuu <u>aac</u> uuuu <u>ca</u> gu <u>aa</u> .....                                                                                                                                                | 1  | 0 | S04 |
| <u>.u</u> uuucaguu <u>aaa</u> aguu <u>aag</u> agucg.....                                                                                                                                                       | 1  | 0 | S04 |
| <u>.u</u> ucaguu <u>aaa</u> aguu <u>aag</u> agucggg.....                                                                                                                                                       | 1  | 0 | S04 |
| <u>.u</u> caguu <u>aaa</u> aguu <u>aag</u> agucgggu.....                                                                                                                                                       | 3  | 0 | S04 |
| <u>.u</u> caguu <u>aaa</u> aguu <u>aag</u> agucggguG.....                                                                                                                                                      | 1  | 1 | S04 |
| <u>.a</u> guuu <u>aaa</u> aguu <u>aag</u> agucgggu <u>uc</u> .....                                                                                                                                             | 1  | 0 | S04 |
| <u>.g</u> uuuu <u>aaa</u> aguu <u>aag</u> agucgggu.....                                                                                                                                                        | 1  | 0 | S04 |
| <u>.g</u> uuuu <u>aaa</u> aguu <u>aag</u> agucgggu <u>uc</u> .....                                                                                                                                             | 1  | 0 | S04 |
| <u>.g</u> uuuu <u>aaa</u> aguu <u>aag</u> agucgggu <u>uc</u> A.....                                                                                                                                            | 1  | 1 | S04 |
| <u>.g</u> uuuu <u>aaa</u> aguu <u>aag</u> agucgggu <u>uc</u> .....                                                                                                                                             | 3  | 0 | S04 |
| <u>.u</u> uuuu <u>aaa</u> aguu <u>aag</u> agucgggu <u>uc</u> A.....                                                                                                                                            | 2  | 1 | S04 |
| <u>.u</u> uuuu <u>aaa</u> aguu <u>aag</u> agucgggu <u>uc</u> ua.....                                                                                                                                           | 1  | 0 | S04 |
| <u>.G</u> aaa <u>aaa</u> aguu <u>aag</u> agucgggu <u>uc</u> ua.....                                                                                                                                            | 1  | 1 | S04 |
| <u>.a</u> aaa <u>aaa</u> aguu <u>aag</u> agucgggu <u>uc</u> .....                                                                                                                                              | 1  | 0 | S04 |
| <u>.a</u> aaa <u>aaa</u> aguu <u>aag</u> agucgggu <u>uc</u> G.....                                                                                                                                             | 1  | 1 | S04 |



Star

Mature

cguuuucaucacgucgauuggugucaagccaugcuaauuaguucucgucagucuaagaggaaauuugcagggcucugauaccaauugaugcaauggaagcauccauuu

|                                    |      |   |     |
|------------------------------------|------|---|-----|
| .....cggcCcgauaccaauugaug.....     | 12   | 1 | S03 |
| .....cggcucugauaccaauuCaug.....    | 1    | 1 | S03 |
| .....cggcucugauaccaauugaug.....    | 2808 | 0 | S03 |
| .....cggGucugauaccaauugaug.....    | 2    | 1 | S03 |
| .....cggcucugauaUcaauugaug.....    | 2    | 1 | S03 |
| .....cggcucugaCaccaauugaug.....    | 7    | 1 | S03 |
| .....cggcucugUuaccaauugaug.....    | 5    | 1 | S03 |
| .....cggcucGgauaccaauugaug.....    | 1    | 1 | S03 |
| .....cggcucugauaccaauuAaug.....    | 2    | 1 | S03 |
| .....cggcucugGuaccaauugaug.....    | 7    | 1 | S03 |
| .....cggcucugauaccaauAaug.....     | 2    | 1 | S03 |
| .....cggcucugauaccaauugauU.....    | 17   | 1 | S03 |
| .....cggcucugauacUauugaug.....     | 5    | 1 | S03 |
| .....cggcucugauaccaGaug.....       | 5    | 1 | S03 |
| .....cggcucugauaccCauugaug.....    | 2    | 1 | S03 |
| .....cggcGcugauaccaauugaug.....    | 1    | 1 | S03 |
| .....cggcucAgauaccaauugaug.....    | 4    | 1 | S03 |
| .....cggcucugauUccaauugaug.....    | 4    | 1 | S03 |
| .....cggUucugauaccaauugaug.....    | 1    | 1 | S03 |
| .....cggcucugauaccaauugaGg.....    | 4    | 1 | S03 |
| .....cggcucugauaccaauugauC.....    | 2    | 1 | S03 |
| .....cggcucugauaccaauugauA.....    | 270  | 1 | S03 |
| .....cggcuGugauaccaauugaug.....    | 1    | 1 | S03 |
| .....Aggcucugauaccaauugaug.....    | 1    | 1 | S03 |
| .....cggcAcugauaccaauugaug.....    | 4    | 1 | S03 |
| .....cggcucugauaccaauugaugU.....   | 4    | 1 | S03 |
| .....cggcucugauaccaauugaugA.....   | 1    | 1 | S03 |
| .....ggcucugauaccaauugaug.....     | 4    | 0 | S03 |
| .....ggcucugauaccaauuUaug.....     | 1    | 1 | S03 |
| .....auuuugcacggcucugauaccaau..... | 1    | 0 | S04 |
| .....cacggcucugauaccaauugaugc..... | 1    | 0 | S04 |
| .....acggcucugauGccaauugaug.....   | 1    | 1 | S04 |
| .....Cggcucugauaccaauugaug.....    | 1    | 1 | S04 |
| .....acggcucugauaccaauugaug.....   | 2    | 0 | S04 |
| .....cggcucCgauaccaauug.....       | 1    | 1 | S04 |
| .....cggcAcugauaccaauug.....       | 1    | 1 | S04 |
| .....cggcucugauaccaauuA.....       | 1    | 1 | S04 |
| .....cggcucugauaccaauug.....       | 10   | 0 | S04 |
| .....cggcucugauaccaauuga.....      | 17   | 0 | S04 |
| .....cggcucugaCaccaauuga.....      | 1    | 1 | S04 |
| .....cggcucugauaccaauugG.....      | 1    | 1 | S04 |
| .....cggcucugauaccaauugaA.....     | 1    | 1 | S04 |
| .....cggcucugauaccaauugaC.....     | 3    | 1 | S04 |
| .....cggcucugauaccaauugau.....     | 26   | 0 | S04 |
| .....cgCucugauaccaauugau.....      | 1    | 1 | S04 |
| .....cggcucugauaccaauugaG.....     | 1    | 1 | S04 |
| .....cggcucugauGccaauugaug.....    | 18   | 1 | S04 |
| .....cggcGcugauaccaauugaug.....    | 4    | 1 | S04 |
| .....cggcucugauaccaauuAaug.....    | 6    | 1 | S04 |
| .....cggcuUugauaccaauugaug.....    | 1    | 1 | S04 |
| .....cgCucugauaccaauugaug.....     | 1    | 1 | S04 |
| .....cggcucugauCccaauugaug.....    | 2    | 1 | S04 |
| .....cggcucAgauaccaauugaug.....    | 4    | 1 | S04 |
| .....Nggcucugauaccaauugaug.....    | 18   | 1 | S04 |
| .....cggcucugauaccaauugauA.....    | 567  | 1 | S04 |
| .....cggcucugauaccUauugaug.....    | 4    | 1 | S04 |
| .....cggcucugauaccaauugCug.....    | 3    | 1 | S04 |
| .....cggcucuCauaccaauugaug.....    | 1    | 1 | S04 |
| .....cggcucugauaccaauugauC.....    | 4    | 1 | S04 |
| .....cggcCcugauaccaauugaug.....    | 23   | 1 | S04 |
| .....cggcucugauaccaCuugaug.....    | 3    | 1 | S04 |
| .....cggcucugUuaccaauugaug.....    | 6    | 1 | S04 |
| .....cggcucugCuaccaauugaug.....    | 3    | 1 | S04 |
| .....cggcucugauUccaauugaug.....    | 3    | 1 | S04 |
| .....cggcucugauaccCauugaug.....    | 4    | 1 | S04 |
| .....cggcucuAauaccaauugaug.....    | 2    | 1 | S04 |
| .....cggcucCgauaccaauugaug.....    | 18   | 1 | S04 |
| .....cggcucugauaccaauugGug.....    | 30   | 1 | S04 |
| .....cggcAcugauaccaauugaug.....    | 8    | 1 | S04 |



Star

Mature

| Sequence                                                                                                       | Count | Count | Label |
|----------------------------------------------------------------------------------------------------------------|-------|-------|-------|
| cguuuucaucacgucgauuggugucaaaagccaugcuaauuaguucucgucagucaaagaggaauuuugcacggcucugauaccaauugaugcaauggaagcauccauuu | 13    | 1     | S04   |
| .....cggcucugauaccaauugaCg.....                                                                                | 2     | 1     | S04   |
| .....cggcuAugauaccaauugaug.....                                                                                | 20    | 1     | S04   |
| .....cggcucugGuaccaauugaug.....                                                                                | 7     | 1     | S04   |
| .....cggcucugauaccaauuCaug.....                                                                                | 1     | 1     | S04   |
| .....cUgcucugauaccaauugaug.....                                                                                | 12    | 1     | S04   |
| .....cggGucugauaccaauugaug.....                                                                                | 4     | 1     | S04   |
| .....cggcucugauaccaGuugaug.....                                                                                | 15    | 1     | S04   |
| .....cggcucugauaccaauugaug.....                                                                                | 5050  | 0     | S04   |
| .....cggcucuUauaccaauugaug.....                                                                                | 6     | 1     | S04   |
| .....cggcucugaAaccaauugaug.....                                                                                | 6     | 1     | S04   |
| .....cggcucugauaccaauugaU.....                                                                                 | 34    | 1     | S04   |
| .....cggcucugauaGcaauugaug.....                                                                                | 1     | 1     | S04   |
| .....cggAucugauaccaauugaug.....                                                                                | 2     | 1     | S04   |
| .....cggcucugauacAauugaug.....                                                                                 | 2     | 1     | S04   |
| .....cggcucugauaccaGugaug.....                                                                                 | 1     | 1     | S04   |
| .....cgAcucugauaccaauugaug.....                                                                                | 10    | 1     | S04   |
| .....cggcucugauaccaauugaGg.....                                                                                | 9     | 1     | S04   |
| .....cggcucugaCaccauugaug.....                                                                                 | 10    | 1     | S04   |
| .....cggUucugauaccaauugaug.....                                                                                | 6     | 1     | S04   |
| .....cggcucugauaUcaauugaug.....                                                                                | 6     | 1     | S04   |
| .....cggcucugauaccauCaug.....                                                                                  | 12    | 1     | S04   |
| .....cggcucugauaccauGgaug.....                                                                                 | 4     | 1     | S04   |
| .....cggcucugauacUauugaug.....                                                                                 | 9     | 1     | S04   |
| .....Uggcucugauaccauugaug.....                                                                                 | 11    | 1     | S04   |
| .....cggcucugauaccGauugaug.....                                                                                | 15    | 1     | S04   |
| .....Aggcucugauaccauugaug.....                                                                                 | 2     | 1     | S04   |
| .....cggcucGgauaccauugaug.....                                                                                 | 2     | 1     | S04   |
| .....cCgcucugauaccauugaug.....                                                                                 | 5     | 1     | S04   |
| .....Gggcucugauaccauugaug.....                                                                                 | 5     | 1     | S04   |
| .....cggcucugauaccauuUaug.....                                                                                 | 4     | 1     | S04   |
| .....cggcucugauaccaauAgaug.....                                                                                | 1     | 1     | S04   |
| .....cggcucugauaccaUuugaug.....                                                                                | 3     | 1     | S04   |
| .....cggcucugauaccauugaAg.....                                                                                 | 4     | 1     | S04   |
| .....cggcucugauaccauugaugc.....                                                                                | 6     | 0     | S04   |
| .....cggcucugauaccauugaugU.....                                                                                | 2     | 1     | S04   |
| .....cggcucugauaccauugaugA.....                                                                                | 3     | 1     | S04   |
| .....cggcucugauaccauugaugG.....                                                                                | 2     | 1     | S04   |
| .....cggcucugauaccauugaugUa.....                                                                               | 1     | 1     | S04   |
| .....ggcucugauaccauugaug.....                                                                                  | 5     | 0     | S04   |

Provisional ID : chrC01\_1001948  
 Score total : 1.1  
 Score for star read(s) : 3.9  
 Score for read counts : -3.9  
 Score for mfe : 1.2  
 Score for randfold : 0  
 Score for cons. seed :  
 Total read count : 4  
 Mature read count : 3  
 Loop read count : 0  
 Star read count : 1

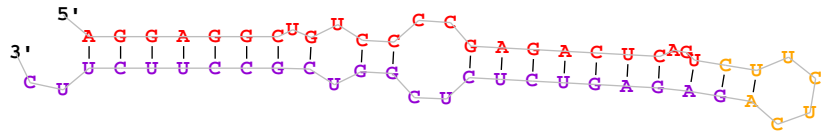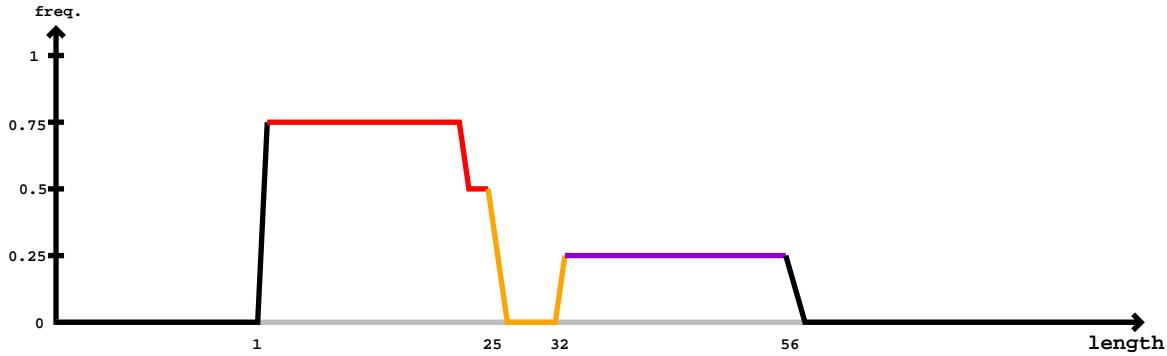

**Mature** **Star**

| 5' - | agcucccgguucuuugggucaggaggcugucccgagacucagucuuucucagagagucucucggucgccuucucuaugugcacuaucgguucgucaugugccucccgau | -3' | obs | mm | sample |
|------|---------------------------------------------------------------------------------------------------------------|-----|-----|----|--------|
|      | agcucccgguucuuugggucaggaggcugucccgagacucagucuuucucagagagucucucggucgccuucucuaugugcacuaucgguucgucaugugccucccgau |     | exp |    |        |
|      | .....aggaggcugucccgagacuc.....                                                                                | 1   | 0   | 0  | S03    |
|      | .....aggaggcugucccgagacucagu.....                                                                             | 2   | 0   | 0  | S03    |
|      | .....gagagucucucggucgccuucuc.....                                                                             | 1   | 0   | 0  | S04    |

Provisional ID : chrC01\_1005977  
 Score total : 0.3  
 Score for star read(s) : -1.3  
 Score for read counts : 0  
 Score for mfe : 1.6  
 Score for randfold : 0  
 Score for cons. seed :  
 Total read count : 36  
 Mature read count : 36  
 Loop read count : 0  
 Star read count : 0

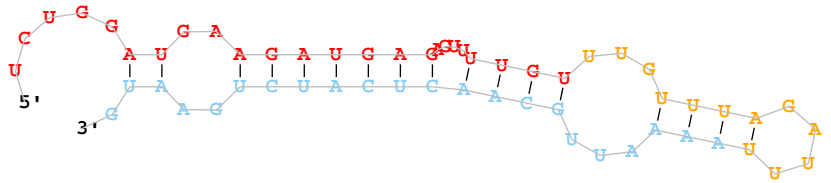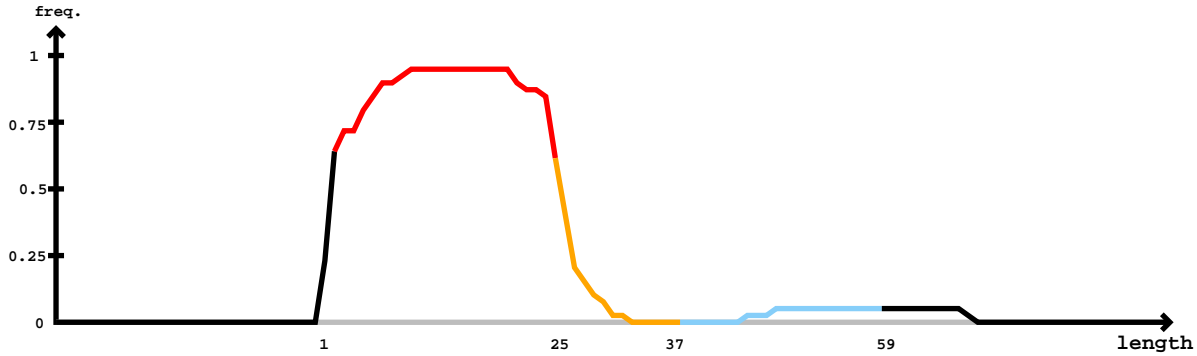

**Mature** **Star**

| 5' -                                                                                                                          | reads | mm | sample |
|-------------------------------------------------------------------------------------------------------------------------------|-------|----|--------|
| uguuuguuucacuauccagagaguu <u>ucuggaugaagaugagaguuuguuuuguuuuagauuu</u> aaaaauugcaacucaucugaaugacucaucuggagaguuuagaaauuuau -3' | exp   |    |        |
| .....aucuggaugaagaugagagaguuC.....                                                                                            | 1     | 1  | S03    |
| .....aucuggaugaagaugagagaguuuug.....                                                                                          | 4     | 0  | S03    |
| .....ucuggaugaagaugagagaguu.....                                                                                              | 1     | 0  | S03    |
| .....ucuggaugaagaugagagaguuuug.....                                                                                           | 1     | 0  | S03    |
| .....ucuggaugaagaugagagaguuuugu.....                                                                                          | 4     | 0  | S03    |
| .....cuggaugaagaugagagaguuuugC.....                                                                                           | 1     | 1  | S03    |
| .....cuggaugaagaugagagaguuuugu.....                                                                                           | 1     | 0  | S03    |
| .....ggaugaagaugagagaguuuugu.....                                                                                             | 1     | 0  | S03    |
| .....Ugaugaagaugagagaguuuugu.....                                                                                             | 1     | 1  | S03    |
| .....gaugaagaugagagaguuuuguuug.....                                                                                           | 1     | 0  | S03    |
| .....augaagaugagagaguuuuguuug.....                                                                                            | 1     | 0  | S03    |
| .....aagUgagagaguuuuguuuguuu.....                                                                                             | 1     | 1  | S03    |
| .....caacucaucugaaugacucaucug.....                                                                                            | 1     | 0  | S03    |
| .....aucuggaugaagaugagagaguuuu.....                                                                                           | 1     | 0  | S04    |
| .....aucuggaugaagaugagagaguuuug.....                                                                                          | 3     | 0  | S04    |
| .....ucuggaugaagaugagagaguu.....                                                                                              | 1     | 0  | S04    |
| .....ucuggaugaagaugagagaguuuug.....                                                                                           | 1     | 0  | S04    |
| .....ucuggaugaagaugagagaguuuugC.....                                                                                          | 2     | 1  | S04    |
| .....ucuggaugaagaugaAaguuuugu.....                                                                                            | 1     | 1  | S04    |
| .....ucuggaugaagaugagagaguuuugu.....                                                                                          | 4     | 0  | S04    |
| .....ucuggaugaagaugagagaguuuuguuu.....                                                                                        | 1     | 0  | S04    |
| .....cuggaugaagaugagagaguuuugu.....                                                                                           | 1     | 0  | S04    |
| .....ggaugaagaugagagaguuuuguuu.....                                                                                           | 1     | 0  | S04    |
| .....gaugaagaugagagaguuuuguuug.....                                                                                           | 1     | 0  | S04    |
| .....augaagaugagagaguuuuguuuguuu.....                                                                                         | 1     | 0  | S04    |
| .....gaagaugagagaguuuuguuuU.....                                                                                              | 1     | 1  | S04    |
| .....cucaucugaaugacucaucu.....                                                                                                | 1     | 0  | S04    |

Provisional ID : chrC01\_1006921  
 Score total : 10.1  
 Score for star read(s) : 3.9  
 Score for read counts : 6.2  
 Score for mfe : 0  
 Score for randfold : 0  
 Score for cons. seed :  
 Total read count : 24  
 Mature read count : 22  
 Loop read count : 0  
 Star read count : 2

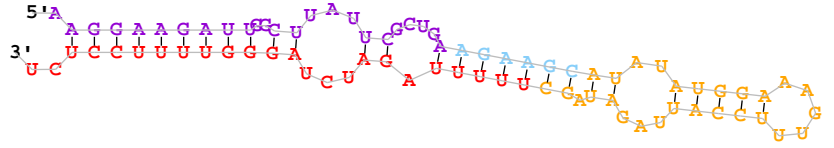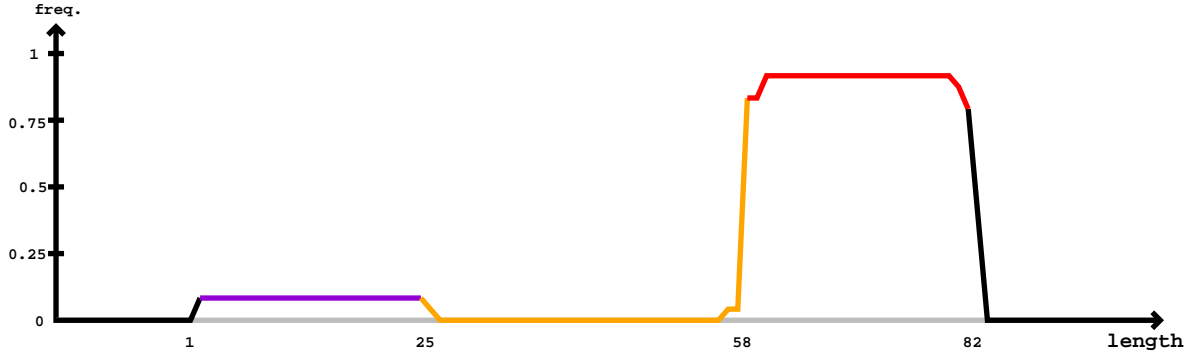

**Star**

**Mature**

| 5' -          | Star      | Mature         | -3'                              | obs                     | exp                 | reads | mm | sample |
|---------------|-----------|----------------|----------------------------------|-------------------------|---------------------|-------|----|--------|
| ccaguuuauagau | aaggaagau | ggcuaauucgcuga | agaagcauuauuggaaguuuccauuagauagc | uuuuuagaucuaggguuuucccu | aaaaauuaaaggaggaguc | 1     | 0  | S03    |
| ccaguuuauagau | aaggaagau | ggcuaauucgcuga | agaagcauuauuggaaguuuccauuagauagc | uuuuuagaucuaggguuuucccu | aaaaauuaaaggaggaguc | 1     | 1  | S03    |
| .....         | aaggaagau | ggcuaauucgcuga | .....                            | .....                   | .....               | 1     | 0  | S03    |
| .....         | .....     | .....          | .....                            | .....                   | .....               | 1     | 1  | S03    |
| .....         | .....     | .....          | .....                            | .....                   | .....               | 1     | 1  | S03    |
| .....         | .....     | .....          | .....                            | .....                   | .....               | 1     | 1  | S03    |
| .....         | .....     | .....          | .....                            | .....                   | .....               | 3     | 0  | S03    |
| .....         | .....     | .....          | .....                            | .....                   | .....               | 1     | 1  | S03    |
| .....         | .....     | .....          | .....                            | .....                   | .....               | 1     | 0  | S03    |
| .....         | aaggaagau | ggcuaauucgcuga | .....                            | .....                   | .....               | 1     | 0  | S04    |
| .....         | .....     | .....          | .....                            | .....                   | .....               | 1     | 0  | S04    |
| .....         | .....     | .....          | .....                            | .....                   | .....               | 1     | 1  | S04    |
| .....         | .....     | .....          | .....                            | .....                   | .....               | 9     | 0  | S04    |
| .....         | .....     | .....          | .....                            | .....                   | .....               | 1     | 1  | S04    |
| .....         | .....     | .....          | .....                            | .....                   | .....               | 1     | 0  | S04    |

Provisional ID : chrC01\_1010244  
Score total : 357.2  
Score for star read(s) : 3.9  
Score for read counts : 353.4  
Score for mfe : -0.1  
Score for randfold : 0  
Score for cons. seed :  
Total read count : 705  
Mature read count : 499  
Loop read count : 0  
Star read count : 206

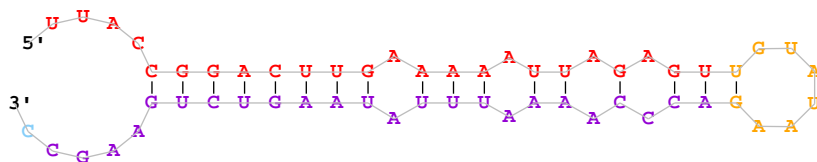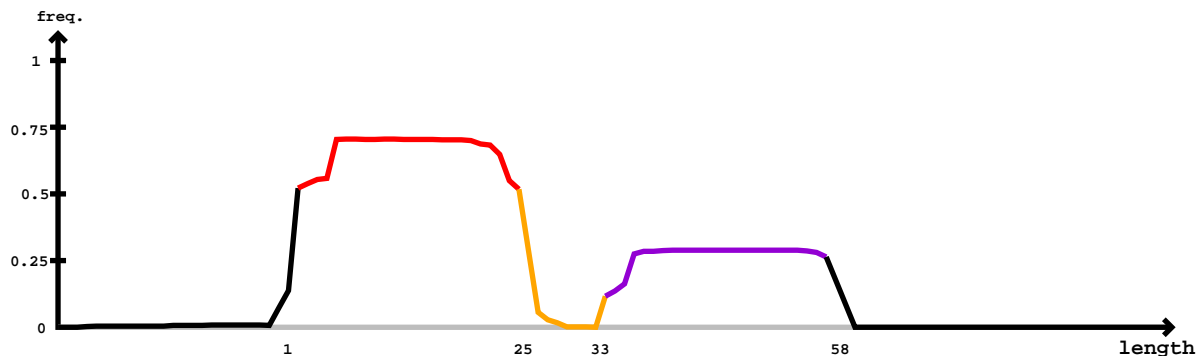

**Mature**

**Star**

| 5' -                                                                                                                                                                |  | -3' | obs | exp | reads | mm | sample |
|---------------------------------------------------------------------------------------------------------------------------------------------------------------------|--|-----|-----|-----|-------|----|--------|
| gguucagagguggacuuguagguuuaccggacuugaaaauuagaguuguaaagacccaaaauuaaagucugaagccaaaauaaaguuguaaccggacacgugucgacucug                                                     |  |     |     |     |       |    |        |
| gguucagagguggacuuguagguuuaccggacuugaaaauuagaguuguaaagacccaaaauuaaagucugaagccaaaauaaaguuguaaccggacacgugucgacucug                                                     |  |     |     |     |       |    |        |
| .....(((((((.....(((((((.....(((((((.....(((((((.....(((((((.....(((((((.....(((((((.....(((((((.....)))))))))))))))))))))))))))))))))))))))))))))))))))))))))))))) |  |     |     |     |       |    |        |
| .guucagGgguggacuugu.....                                                                                                                                            |  |     |     |     | 1     | 1  | S03    |
| .guucagaggAggacuuguagguu.....                                                                                                                                       |  |     |     |     | 1     | 1  | S03    |
| ..uucagGgguggacuugu.....                                                                                                                                            |  |     |     |     | 1     | 1  | S03    |
| .....gguaUcggacuugaaaauuag.....                                                                                                                                     |  |     |     |     | 3     | 1  | S03    |
| .....gguaUcggacuugaaaauuaga.....                                                                                                                                    |  |     |     |     | 16    | 1  | S03    |
| .....gguaUcggacuugaaaauuagagu.....                                                                                                                                  |  |     |     |     | 1     | 1  | S03    |
| .....guuaUcggacuugaaaauu.....                                                                                                                                       |  |     |     |     | 1     | 1  | S03    |
| .....guuaUcggacuugaaaauu.....                                                                                                                                       |  |     |     |     | 1     | 1  | S03    |
| .....guuaUcggacuugaaaauu.....                                                                                                                                       |  |     |     |     | 1     | 1  | S03    |
| .....guuaUcggacuugaaaauuag.....                                                                                                                                     |  |     |     |     | 3     | 1  | S03    |
| .....guuaUcggacuugaaaauuaga.....                                                                                                                                    |  |     |     |     | 5     | 1  | S03    |
| .....guuaUcggacuugaaaauuagag.....                                                                                                                                   |  |     |     |     | 5     | 1  | S03    |
| .....guuaUcggacuugaaaauuagagu.....                                                                                                                                  |  |     |     |     | 3     | 1  | S03    |
| .....guuaUcggacuugaaaauuagaguu.....                                                                                                                                 |  |     |     |     | 1     | 1  | S03    |
| .....uuUcggacuugaaaauu.....                                                                                                                                         |  |     |     |     | 1     | 1  | S03    |
| .....uuUcggacuugaaaauu.....                                                                                                                                         |  |     |     |     | 1     | 1  | S03    |
| .....uuUcggacuugaaaauuag.....                                                                                                                                       |  |     |     |     | 7     | 1  | S03    |
| .....uuUcggacuugaaaauuaga.....                                                                                                                                      |  |     |     |     | 8     | 1  | S03    |
| .....uuUcggacuugaaaauuagag.....                                                                                                                                     |  |     |     |     | 3     | 1  | S03    |
| .....uuUcggacuugaaaauuagagu.....                                                                                                                                    |  |     |     |     | 120   | 1  | S03    |
| .....uuaccggacuugaaaauuagagu.....                                                                                                                                   |  |     |     |     | 3     | 0  | S03    |
| .....uuAaccggacuugaaaauuagagu.....                                                                                                                                  |  |     |     |     | 1     | 1  | S03    |
| .....uuUcggacuugaaaauuagaguu.....                                                                                                                                   |  |     |     |     | 2     | 1  | S03    |
| .....uaccggacuugaaaauuagaguu.....                                                                                                                                   |  |     |     |     | 3     | 0  | S03    |
| .....aGcggacuugaaaauuagagu.....                                                                                                                                     |  |     |     |     | 1     | 1  | S03    |
| .....accggacuugaaaauuagaguu.....                                                                                                                                    |  |     |     |     | 2     | 0  | S03    |
| .....accggacuugaaaauuagaguug.....                                                                                                                                   |  |     |     |     | 2     | 0  | S03    |
| .....ccggacuugaaaauuagaguu.....                                                                                                                                     |  |     |     |     | 1     | 0  | S03    |
| .....cggacuugaaaauuagC.....                                                                                                                                         |  |     |     |     | 1     | 1  | S03    |
| .....cggacuugaaaauuaga.....                                                                                                                                         |  |     |     |     | 1     | 0  | S03    |
| .....cggacuugaaaauuagagu.....                                                                                                                                       |  |     |     |     | 31    | 0  | S03    |
| .....cggacuugaaaauuagagA.....                                                                                                                                       |  |     |     |     | 2     | 1  | S03    |
| .....cggaUuugaaaauuagagu.....                                                                                                                                       |  |     |     |     | 1     | 1  | S03    |

Mature

Star

gguucagagguggacuuguagguuaccggacuugaaaauuagaguuguaaagacccaaaauuuaaagucugaagccaaaaaaaguuguaacggacacgugcagacucug

|                                     |    |   |     |
|-------------------------------------|----|---|-----|
| .....cggacuugaaGaaauuagagu.....     | 1  | 1 | S03 |
| .....cggacuugaaaauuagagG.....       | 1  | 1 | S03 |
| .....cggacuugaaaauuagaguC.....      | 2  | 1 | S03 |
| .....cggacuugaaaauuagaguu.....      | 10 | 0 | S03 |
| .....cggacuugaaaauuagaguuA.....     | 1  | 1 | S03 |
| .....cggacuugaaaauuagaguug.....     | 7  | 0 | S03 |
| .....cggacuugaaaauuagaguugG.....    | 2  | 0 | S03 |
| .....cggacuugaaaauuagaguugG.....    | 1  | 1 | S03 |
| .....cggacuugaaaauuagaguugU.....    | 2  | 1 | S03 |
| .....cggacuugaaGaaauuagaguugua..... | 1  | 1 | S03 |
| .....cggacuugaaaauuagaguugua.....   | 2  | 0 | S03 |
| .....acccaaaaauuuaagucugaC.....     | 1  | 1 | S03 |
| .....acccaaaaauuuaagucugaag.....    | 1  | 0 | S03 |
| .....acccaaaaauuuaagucugaagc.....   | 28 | 0 | S03 |
| .....acccaaaaauuuaagucugaagA.....   | 4  | 1 | S03 |
| .....acccaaaaauuuaagAcugaagc.....   | 1  | 1 | S03 |
| .....acccaaaaauuuaagucugaagU.....   | 6  | 1 | S03 |
| .....cccaaaaauuuaagucugaa.....      | 1  | 0 | S03 |
| .....cccaaaaauuuaagucugaag.....     | 4  | 0 | S03 |
| .....cccaaaaauuuaagucugaagc.....    | 1  | 0 | S03 |
| .....cccaaaaauuuaagucugaagcc.....   | 1  | 0 | S03 |
| .....cccaaaaauuuaagucugaGgcc.....   | 1  | 1 | S03 |
| .....cccaaaaauuuaagucugaag.....     | 1  | 0 | S03 |
| .....cccaaaaauuuaagucugaagc.....    | 7  | 0 | S03 |
| .....cccaaaaauuuaagucugaGgc.....    | 1  | 1 | S03 |
| .....Aaaaauuuaaagucugaagc.....      | 2  | 1 | S03 |
| .....caaaaauuuaaagucugaagc.....     | 20 | 0 | S03 |
| .....caaaaauuuaaagucugaagcc.....    | 2  | 0 | S03 |
| .....aaaauuuaaagucugaa.....         | 1  | 0 | S03 |
| .....aaaauuuaaagucugaagc.....       | 1  | 0 | S03 |
| .....aaaauuuaaagucugaagcca.....     | 1  | 0 | S03 |
| .....aaaauuuaaagucugaagcc.....      | 1  | 0 | S03 |
| .....auuuGuaagucugaagcc.....        | 1  | 1 | S03 |
| .....uggacuuguagguuaUcgg.....       | 1  | 1 | S04 |
| .....uggacuuguagguuaUcggacuu.....   | 1  | 1 | S04 |
| .....cuuuguagguuaUcggacuugaaa.....  | 1  | 1 | S04 |
| .....agguuaccggacuugaaaauuag.....   | 1  | 0 | S04 |
| .....gguuaUcggacuugaaaauu.....      | 3  | 1 | S04 |
| .....gguuaUcggacuugaaaauu.....      | 2  | 1 | S04 |
| .....gguuaUcggacuugaaaauuaga.....   | 22 | 1 | S04 |
| .....guuaUcggacuugaaaauu.....       | 1  | 1 | S04 |
| .....guuaUcggacuugaaaauuag.....     | 4  | 1 | S04 |
| .....guuaccggacuugaaaauuaga.....    | 1  | 0 | S04 |
| .....guuaUcggacuugaaaauuaga.....    | 5  | 1 | S04 |
| .....guuaUcggacuugaaaauuagag.....   | 12 | 1 | S04 |
| .....guuaUcggacuugaaaauuagagu.....  | 2  | 1 | S04 |
| .....guuaUcggacuugaaaauuagaguu..... | 1  | 1 | S04 |
| .....uuuUcggacuugaaaauu.....        | 3  | 1 | S04 |
| .....uuuUcggacuugaaaauuag.....      | 7  | 1 | S04 |
| .....uuuUcggacuugaaaauuaga.....     | 11 | 1 | S04 |
| .....uuuUcggacuugaaaauuagag.....    | 3  | 1 | S04 |
| .....uuuUcggacuugaaaauuagagu.....   | 95 | 1 | S04 |
| .....uuaccggacuugaaaauuagagC.....   | 1  | 1 | S04 |
| .....uuaccggacuugaaaauuagagu.....   | 6  | 0 | S04 |
| .....uuuUcggacuugaaaauuagaguu.....  | 2  | 1 | S04 |
| .....uaccggacuugaaaauuagagC.....    | 1  | 1 | S04 |
| .....uaccggacuugaaaauuagagu.....    | 1  | 0 | S04 |
| .....uaccggGcuugaaaauuagaguu.....   | 1  | 1 | S04 |
| .....uGcggacuugaaaauuagaguu.....    | 1  | 1 | S04 |
| .....uaccggacuugaaaauuagaguu.....   | 4  | 0 | S04 |
| .....uaccggaUuuugaaaauuagaguu.....  | 1  | 1 | S04 |
| .....accggacuugaaaauuagaguu.....    | 1  | 0 | S04 |
| .....accggaUuuugaaaauuagaguu.....   | 1  | 1 | S04 |
| .....accggacuugaaaauuagaguu.....    | 2  | 0 | S04 |
| .....accggaGuugaaaauuagaguu.....    | 1  | 1 | S04 |
| .....aAccggacuugaaaauuagaguug.....  | 1  | 1 | S04 |
| .....accggacuugaaaauuagaguug.....   | 1  | 0 | S04 |
| .....ccggacuugaaaauuagaguuA.....    | 1  | 1 | S04 |
| .....ccggacuugaaaauuagaguuAgu.....  | 1  | 1 | S04 |

Mature

Star

|                                                                                                                |    |   |     |
|----------------------------------------------------------------------------------------------------------------|----|---|-----|
| gguucagaggggacuuuguagguuaccggacuugaaaauuagaguuguuaaagacccaaaauuuuaagucugaagccaaaaaaaguuguaacggacacgugcgcacucug |    |   |     |
| .....cggacCugaaaauuagagu.....                                                                                  | 1  | 1 | S04 |
| .....cggacuugaaaauuagaguG.....                                                                                 | 1  | 1 | S04 |
| .....cggacuugaaaauuagagu.....                                                                                  | 12 | 0 | S04 |
| .....cggacuugaaaauuagaguC.....                                                                                 | 3  | 1 | S04 |
| .....cggacuugaaaauuagaguG.....                                                                                 | 1  | 1 | S04 |
| .....cggacuugaaaauuagaguU.....                                                                                 | 4  | 0 | S04 |
| .....cggacuugaaaauuagaguug.....                                                                                | 4  | 0 | S04 |
| .....cggacuugaaaauuagaguA.....                                                                                 | 1  | 1 | S04 |
| .....cggacuugaaaaAaagaguug.....                                                                                | 1  | 1 | S04 |
| .....cggacuugaaaauuagaguugA.....                                                                               | 1  | 1 | S04 |
| .....cggacuugGaaaauuagaguugu.....                                                                              | 1  | 1 | S04 |
| .....cggacuugaaaauuagaguugu.....                                                                               | 2  | 0 | S04 |
| .....cggacuugaaaauuagaguuguU.....                                                                              | 1  | 1 | S04 |
| .....cggacuugaaaauuagaguugCa.....                                                                              | 1  | 1 | S04 |
| .....cggacuugaaaauuagagAugua.....                                                                              | 1  | 1 | S04 |
| .....cggauuugaaaauuagaguugua.....                                                                              | 1  | 1 | S04 |
| .....cggacuugaaaauuagaguugua.....                                                                              | 2  | 0 | S04 |
| .....ggacuugaaaauuagaguug.....                                                                                 | 1  | 0 | S04 |
| .....uugaaaauuagaguuguuaaa.....                                                                                | 1  | 0 | S04 |
| .....acccaaaauuuuaagucuga.....                                                                                 | 2  | 0 | S04 |
| .....acccaaaauuuuaagCcugaag.....                                                                               | 1  | 1 | S04 |
| .....acccaaaauuuuaagucugaagG.....                                                                              | 1  | 1 | S04 |
| .....acccaaaauuuuaagucugaagc.....                                                                              | 29 | 0 | S04 |
| .....acccaaaauuuuaagucCgaagc.....                                                                              | 1  | 1 | S04 |
| .....acccaaaauuuuaagucugaCgc.....                                                                              | 1  | 1 | S04 |
| .....acccaaaauuuuaagucugaagA.....                                                                              | 4  | 1 | S04 |
| .....acccaaaauuuuaagucugaagU.....                                                                              | 3  | 1 | S04 |
| .....cccaaaauuuuaagucugaa.....                                                                                 | 1  | 0 | S04 |
| .....cccaaaauuuuaagucugaag.....                                                                                | 2  | 0 | S04 |
| .....cccaaaauuuuaagucugaagc.....                                                                               | 1  | 0 | S04 |
| .....cccaaaauuuuaagucugaagcc.....                                                                              | 2  | 0 | S04 |
| .....ccaaauuuuaaagucugaag.....                                                                                 | 1  | 0 | S04 |
| .....ccaaauuuuaaagucugaagc.....                                                                                | 6  | 0 | S04 |
| .....ccaaauuuuaaagucugaagA.....                                                                                | 1  | 1 | S04 |
| .....ccaaauuuuaaagucugaGgc.....                                                                                | 1  | 1 | S04 |
| .....ccaaauuuuaaagucugaagG.....                                                                                | 1  | 1 | S04 |
| .....caaaauuuuaaagucugaag.....                                                                                 | 2  | 0 | S04 |
| .....Aaaaauuuaaagucugaagc.....                                                                                 | 2  | 1 | S04 |
| .....caaaauuuuaaagucugaagc.....                                                                                | 47 | 0 | S04 |
| .....caaaauCuuaaagucugaagc.....                                                                                | 1  | 1 | S04 |
| .....caaaauuuuaaagucugaagcc.....                                                                               | 3  | 0 | S04 |
| .....caaaauuuuaaagucugaagcA.....                                                                               | 1  | 1 | S04 |
| .....aaaauuuaaagucugaagc.....                                                                                  | 1  | 0 | S04 |
| .....aaaauuuaaagucugaagA.....                                                                                  | 2  | 1 | S04 |
| .....aaaauuuaaagucugaagcc.....                                                                                 | 1  | 0 | S04 |
| .....aauuuaaagucugaagcc.....                                                                                   | 1  | 0 | S04 |

Provisional ID : chrC01\_1014173  
 Score total : 0.4  
 Score for star read(s) : -1.3  
 Score for read counts : 0  
 Score for mfe : 1.7  
 Score for randfold : 0  
 Score for cons. seed :  
 Total read count : 12  
 Mature read count : 11  
 Loop read count : 0  
 Star read count : 1

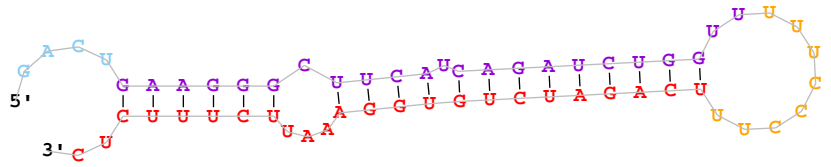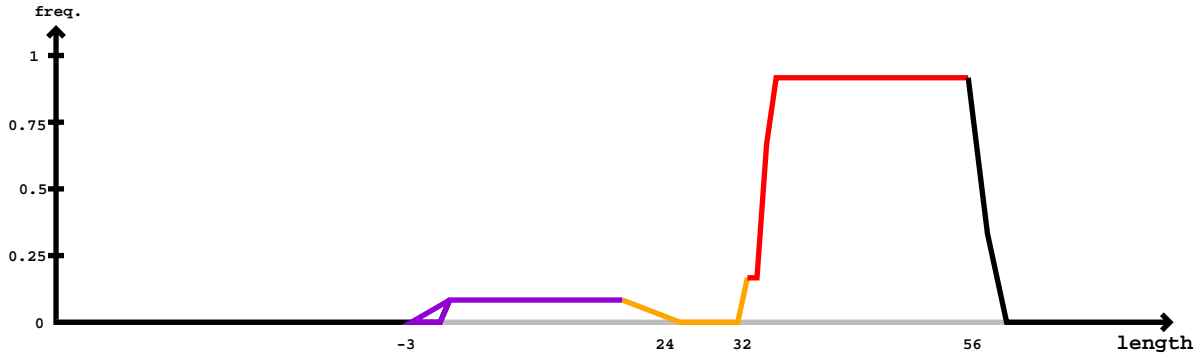

Star

Mature

| 5'                                      | Star                                                                                     | Mature               | -3' | obs | exp | reads | mm | sample |
|-----------------------------------------|------------------------------------------------------------------------------------------|----------------------|-----|-----|-----|-------|----|--------|
| acggcgugacgacggugaagagggucggcguuuaggacu | gaagggcucaucagaucugguuuuuccuuucagaucuguggaaaauucuuc                                      | ggcgaccgcucgaaucacgu |     | 1   | 1   | 1     | 1  | S03    |
| acggcgugacgacggugaagagggucggcguuuag     | gacugaagggcucaucagaucugguuuuuccuuucagaucuguggaaaauucuuc                                  | ggcgaccgcucgaaucacgu |     | 1   | 1   | 1     | 1  | S03    |
| .....)                                  | .....(((.....(((.....(((.....(((.....(((.....(((.....(((.....))))))))))))))))))))))..... |                      |     | 1   | 0   | 1     | 0  | S03    |
| .....                                   | .....gaucuguggaaaauucuucU.....                                                           |                      |     | 1   | 1   | 1     | 1  | S04    |
| .....                                   | .....ucagaucuguggaaaauucuuc.....                                                         |                      |     | 2   | 0   | 2     | 0  | S04    |
| .....                                   | .....agaucuguggaaaauucuuc.....                                                           |                      |     | 2   | 0   | 2     | 0  | S04    |
| .....                                   | .....agGucuguggaaaauucuucgG.....                                                         |                      |     | 1   | 1   | 1     | 1  | S04    |
| .....                                   | .....gaucuguggaaaauucuuc.....                                                            |                      |     | 1   | 0   | 1     | 0  | S04    |
| .....                                   | .....gaucuguggaaaauucuucgG.....                                                          |                      |     | 2   | 0   | 2     | 0  | S04    |







Provisional ID : chrC01\_1023865  
 Score total : 6.4  
 Score for star read(s) : 3.9  
 Score for read counts : 0.1  
 Score for mfe : 2.4  
 Score for randfold : 0  
 Score for cons. seed :  
 Total read count : 12  
 Mature read count : 7  
 Loop read count : 3  
 Star read count : 2

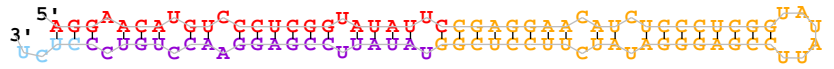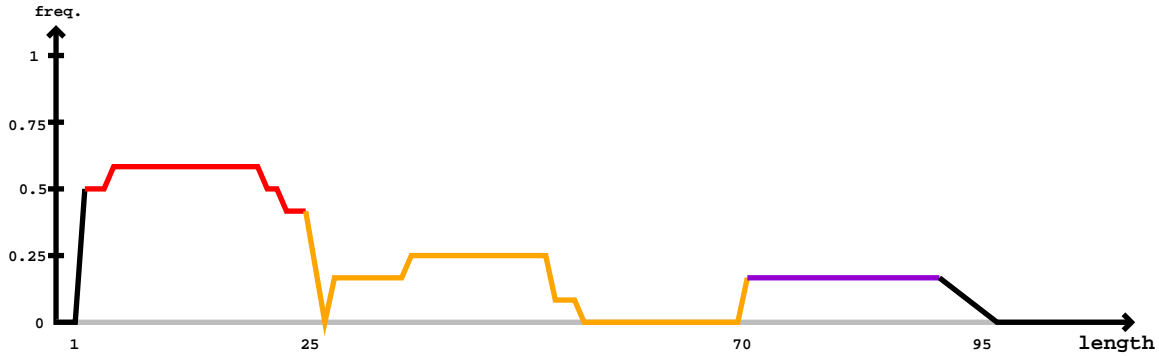

**Mature**

**Star**

| 5' -                                                                                                      | obs   | mm | sample |
|-----------------------------------------------------------------------------------------------------------|-------|----|--------|
| gaggaacaugucccucgguaauuucgaggaacaucuccucgguaauuucgagggauaucuuccucgguaauuuccgaggaaccuguccucuguaagcccgaacgu | -3'   |    |        |
| gaggaacaugucccucgguaauuucgaggaacaucuccucgguaauuucgagggauaucuuccucgguaauuuccgaggaaccuguccucuguaagcccgaacgu | exp   |    |        |
| ((((((((.....)))))))))).....                                                                              | reads |    |        |
| .aggaacaugucccucggua.....                                                                                 | 1     | 0  | S03    |
| .aggaacaugucccucggua.....                                                                                 | 1     | 0  | S03    |
| .....cuccucgguaauuucg.....                                                                                | 1     | 0  | S03    |
| .....uauuuccgaggaaccugucc.....                                                                            | 1     | 0  | S03    |
| .aggaacGugucccucgguaauuc.....                                                                             | 1     | 1  | S04    |
| .aggaacaugucccucgguaauuuc.....                                                                            | 3     | 0  | S04    |
| .....aacaugucccucgguaauuuc.....                                                                           | 1     | 0  | S04    |
| .....aggaacaucuccucgguaauuu.....                                                                          | 2     | 0  | S04    |
| .....uauuuccgaggaaccugucU.....                                                                            | 1     | 1  | S04    |







Provisional ID : chrC01\_1040543  
 Score total : 20  
 Score for star read(s) : 3.9  
 Score for read counts : 13.4  
 Score for mfe : 2.7  
 Score for randfold : 0  
 Score for cons. seed :  
 Total read count : 38  
 Mature read count : 37  
 Loop read count : 0  
 Star read count : 1

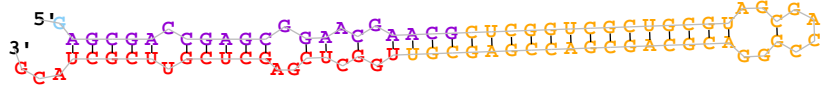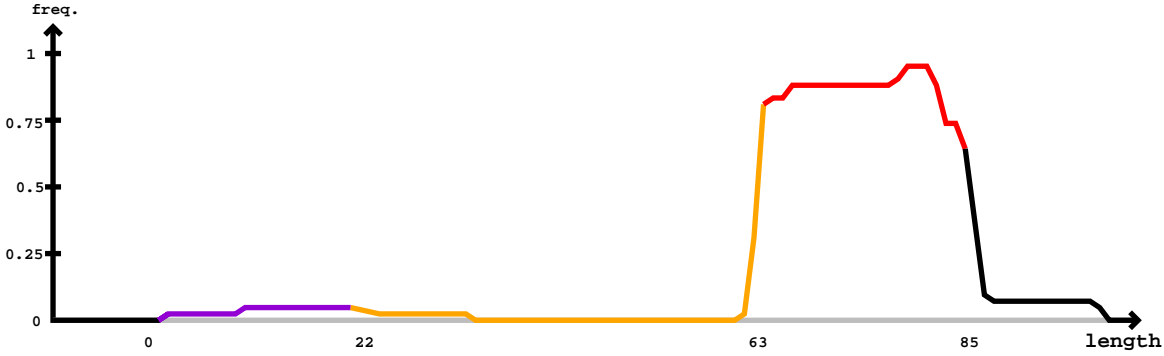

**Star** **Mature**

```

5' - gucgauacagagcgaccgagcggaaacgaacgcucggucgcugcguagcgcacgggagcagcagccgagcgguuggcucgagcucguucgcuacguaacgaccgagcucgg -3'
gucgauacaagcgaccgagcggaaacgaacgcucggucgcugcguagcgcacgggagcagcagccgagcgguuggcucgagcucguucgcuacguaacgaccgagcucgg
(((.....(((((((.....((.....)))))))))))))))))))).)))))))).)))))))).)))))))).)))))))).)))))))).)))))))).)))))))).)))))))).).....
.....agcgaccgagcggaaacgaacA.....
.....guuggcucgagcucguucgcu.....
.....uuggcucgagcucguucgc.....
.....uuggcucgagcucguucGU.....
.....uuggcucgagcucguucgcu.....
.....uuggcucgagcucguucgcuAA.....
.....uuggcucgagcucguucgcuac.....
.....uuggcucgagcucguucgcuacg.....
.....uuggcucgagcucguucgcuacgu.....
.....uuggcucgagcucguucgcuacgC.....
.....uggcucgagcucguucgcu.....
.....uggcucgagcucguucgcuacA.....
.....uggcucgagcucguucgcuacg.....
.....uggcucgagcucguucgcuacgu.....
.....Gggcucgagcucguucgcuacgu.....
.....uggcucgagcucguucgcuacgC.....
.....uggcucgagcucguucgcuacgua.....
.....ggcucgagcucguucgcuacgu.....
.....cucgagcucguucgcuacgu.....
.....ucgcuacguaacgaccgagcuu...
.....cgcuacguaacgaccgagcu...

.....aUcggaacgaacgcucggucgcug.....
.....uggcucgagcucguucgcuacg.....
.....cucgagcucguucgcuacgu.....
.....cgcuacguaacgaccgagcuu...

```

| obs | exp | reads | mm | sample |
|-----|-----|-------|----|--------|
| 1   | 1   | 1     | 1  | S03    |
| 1   | 0   | 1     | 0  | S03    |
| 2   | 0   | 2     | 0  | S03    |
| 1   | 1   | 1     | 1  | S03    |
| 1   | 0   | 1     | 0  | S03    |
| 1   | 1   | 1     | 1  | S03    |
| 3   | 0   | 3     | 0  | S03    |
| 2   | 0   | 2     | 0  | S03    |
| 1   | 0   | 1     | 0  | S03    |
| 1   | 1   | 1     | 1  | S03    |
| 1   | 0   | 1     | 0  | S03    |
| 1   | 0   | 1     | 0  | S03    |
| 1   | 0   | 1     | 0  | S03    |
| 4   | 0   | 4     | 0  | S03    |
| 6   | 1   | 6     | 1  | S03    |
| 5   | 0   | 5     | 0  | S03    |
| 1   | 0   | 1     | 0  | S03    |
| 1   | 0   | 1     | 0  | S03    |
| 1   | 0   | 1     | 0  | S03    |
| 1   | 1   | 1     | 1  | S03    |
| 1   | 0   | 1     | 0  | S03    |
| 1   | 0   | 1     | 0  | S03    |
| 1   | 1   | 1     | 1  | S03    |
| 1   | 0   | 1     | 0  | S03    |
| 1   | 0   | 1     | 0  | S03    |
| 1   | 1   | 1     | 1  | S04    |
| 2   | 0   | 2     | 0  | S04    |
| 1   | 0   | 1     | 0  | S04    |
| 1   | 0   | 1     | 0  | S04    |







Star

Mature

|                                                                                                                   |    |   |     |
|-------------------------------------------------------------------------------------------------------------------|----|---|-----|
| uaaaugaaauccucgaaauucccgaggaauuccgaggaaaauuccgaggaaaacacaaaauuugguuuccucggaauuccccggaaauuaccgacggaauuccgaggaaaaua |    |   |     |
| .....gaaCauaccgacggaauuccga.....                                                                                  | 1  | 1 | S03 |
| .....gaaauuaccgacggaauAccga.....                                                                                  | 1  | 1 | S03 |
| .....gaaauuaccgacggaauuccga.....                                                                                  | 41 | 0 | S03 |
| .....gaaauuaccgacggaauuccgG.....                                                                                  | 6  | 1 | S03 |
| .....gaaauuaccgacggaauuccgag.....                                                                                 | 14 | 0 | S03 |
| .....gaaauuaccgacggaauuccgagC.....                                                                                | 1  | 1 | S03 |
| .....gaaauuaccgacggaauuccgagg.....                                                                                | 4  | 0 | S03 |
| .....aaauuaccgacggaauuccg.....                                                                                    | 5  | 0 | S03 |
| .....aaauuaccgCcggaauuccg.....                                                                                    | 1  | 1 | S03 |
| .....aaauuaccgacggaauuccga.....                                                                                   | 32 | 0 | S03 |
| .....aaauuaccgacggaauuccgag.....                                                                                  | 30 | 0 | S03 |
| .....aaauuaccgacggaauCccgag.....                                                                                  | 1  | 1 | S03 |
| .....aaauuaccgacggaauuccgagg.....                                                                                 | 4  | 0 | S03 |
| .....aaauuaccgacggaauuccgagC.....                                                                                 | 2  | 1 | S03 |
| .....aaauuaccgacggaauuccgagga.....                                                                                | 3  | 0 | S03 |
| .....auuaccgacggaauuccg.....                                                                                      | 5  | 0 | S03 |
| .....auuaccgacggaauuccUa.....                                                                                     | 1  | 1 | S03 |
| .....auuaccgacggaauuccga.....                                                                                     | 28 | 0 | S03 |
| .....auuaccgacggaauuccgag.....                                                                                    | 15 | 0 | S03 |
| .....auuaccgacggaauuccgagC.....                                                                                   | 20 | 1 | S03 |
| .....auuaccgacggaauuccgagg.....                                                                                   | 8  | 0 | S03 |
| .....auuaccgacggaauuccgaggaa.....                                                                                 | 1  | 0 | S03 |
| .....uuaccgacggaauuccga.....                                                                                      | 5  | 0 | S03 |
| .....uuaccgacggaauuccgag.....                                                                                     | 3  | 0 | S03 |
| .....uuaccgacggaauuccgaggaa.....                                                                                  | 1  | 0 | S03 |
| .....Cauaccgacggaauuccgaggaa.....                                                                                 | 1  | 1 | S03 |
| .....uuaccgacggaauuccgaggaaa.....                                                                                 | 3  | 0 | S03 |
| .....auaccgacggaauuccga.....                                                                                      | 3  | 0 | S03 |
| .....auaccgacggaauuccgag.....                                                                                     | 1  | 0 | S03 |
| .....auaccgacggaauuccgagg.....                                                                                    | 1  | 0 | S03 |
| .....auaccgacggaauuccgaggaaa.....                                                                                 | 1  | 0 | S03 |
| .....auaccgacggaauuccgaggaaaau.....                                                                               | 1  | 0 | S03 |
| .....acAgacggaauuccgaggaa.....                                                                                    | 1  | 1 | S03 |
| .....ccgacggaauuccgagga.....                                                                                      | 1  | 0 | S03 |
| .....ccgacggaauuccgaggaaa.....                                                                                    | 1  | 0 | S03 |
| .....cgacggaauuccgaggaa.....                                                                                      | 3  | 0 | S03 |
| .....cgacggaauuccgaggaaa.....                                                                                     | 1  | 0 | S03 |
| .....cgacggaauuccgaggaaaau.....                                                                                   | 1  | 0 | S03 |
| .....gacggaauuccgaggaaa.....                                                                                      | 2  | 0 | S03 |
| .....gacggaauuccgaggaaaau.....                                                                                    | 3  | 0 | S03 |
| .....gacggaauuccgaggaaaaua.....                                                                                   | 1  | 0 | S03 |
| .....gaaauucccgaggaauuccga.....                                                                                   | 3  | 0 | S04 |
| .....aauuuccgaggaauuccgagga.....                                                                                  | 1  | 0 | S04 |
| .....auuuccgaggaauuccgagg.....                                                                                    | 2  | 0 | S04 |
| .....gaggaauuccgaggaau.....                                                                                       | 1  | 0 | S04 |
| .....gaggaauCccgaggaaua.....                                                                                      | 1  | 1 | S04 |
| .....gaggaauuccgaggaaua.....                                                                                      | 1  | 0 | S04 |
| .....gGggaauuccgaggaaua.....                                                                                      | 1  | 1 | S04 |
| .....gaggaauuccgagCaaau.....                                                                                      | 1  | 1 | S04 |
| .....gaggaauuccgaggaaua.....                                                                                      | 7  | 0 | S04 |
| .....gaggaauuccgaggaauCgaa.....                                                                                   | 1  | 1 | S04 |
| .....gaggaauuccgaggaaua.....                                                                                      | 1  | 0 | S04 |
| .....agggaauuccgaggaaua.....                                                                                      | 1  | 0 | S04 |
| .....agggaauuccgaggaaua.....                                                                                      | 1  | 0 | S04 |
| .....agggaauuccgaggaaua.....                                                                                      | 1  | 0 | S04 |
| .....agggaauuccgaggaaua.....                                                                                      | 3  | 0 | S04 |
| .....agggaauuccgaggaauaU.....                                                                                     | 2  | 1 | S04 |
| .....agggaauuccgaggaaua.....                                                                                      | 1  | 0 | S04 |
| .....agggaauuccgaggaaua.....                                                                                      | 1  | 0 | S04 |
| .....gggaauuccgaggaaua.....                                                                                       | 2  | 0 | S04 |
| .....aauccgaggaaua.....                                                                                           | 1  | 0 | S04 |
| .....aauccgaggaaua.....                                                                                           | 1  | 0 | S04 |
| .....aauccgaggGaacacaaaauug.....                                                                                  | 1  | 1 | S04 |
| .....aauccgaggaaua.....                                                                                           | 3  | 0 | S04 |
| .....auuccgaggaaua.....                                                                                           | 2  | 0 | S04 |
| .....uuccgaggaaua.....                                                                                            | 1  | 0 | S04 |
| .....cgaggaaua.....                                                                                               | 1  | 0 | S04 |
| .....cacaauuugguuuccucggaau.....                                                                                  | 2  | 0 | S04 |
| .....acaaaauugguuuccucggaau.....                                                                                  | 1  | 0 | S04 |

Star

Mature

|                                                                                                                |    |   |     |
|----------------------------------------------------------------------------------------------------------------|----|---|-----|
| uaaaugaaauccucgaaauucccgaggaauuccgaggaaaauuccgaggaaacacaaaaauugguuuccucggaauuucccggaauuaccgacggaauuccgaggaaaua |    |   |     |
| .....caaaaauugguuuccucggaauuu.....                                                                             | 1  | 0 | S04 |
| .....aaaauuugguuuccucggaauuu.....                                                                              | 2  | 0 | S04 |
| .....aaauuugguuuccucggaauu.....                                                                                | 1  | 0 | S04 |
| .....guuuccucggaauuuccc.....                                                                                   | 1  | 0 | S04 |
| .....guuuccucggaauuucccU.....                                                                                  | 1  | 1 | S04 |
| .....uuuccucggaauuucccA.....                                                                                   | 1  | 1 | S04 |
| .....uuuccucggaauuucccAA.....                                                                                  | 1  | 1 | S04 |
| .....cucggaauuucccggaaUua.....                                                                                 | 1  | 1 | S04 |
| .....cggaauuaccgacggaauu.....                                                                                  | 1  | 0 | S04 |
| .....cggaauuaccgacggaauu.....                                                                                  | 4  | 0 | S04 |
| .....ggaauuaccgacggaauuccga.....                                                                               | 1  | 0 | S04 |
| .....ggaauuaccgacggaauuccgag.....                                                                              | 1  | 0 | S04 |
| .....gaaauaccgacggaauuccg.....                                                                                 | 5  | 0 | S04 |
| .....gaaauaccgacggaauuccgU.....                                                                                | 2  | 1 | S04 |
| .....gaaauaccgacggaauuccUa.....                                                                                | 1  | 1 | S04 |
| .....gaaauaccgacggaauuccga.....                                                                                | 56 | 0 | S04 |
| .....gaaauaccgacggaauuccgag.....                                                                               | 16 | 0 | S04 |
| .....gaaauaccgacggaauuccgG.....                                                                                | 1  | 1 | S04 |
| .....gaaauaccgacggaauuccgagC.....                                                                              | 2  | 1 | S04 |
| .....gaaauaccgacggaauuccgagg.....                                                                              | 5  | 0 | S04 |
| .....gaaauaccgacggaauuccgagg.....                                                                              | 1  | 1 | S04 |
| .....aaauuaccgacggaauuccg.....                                                                                 | 5  | 0 | S04 |
| .....aaauuaccgacggaauuccgC.....                                                                                | 2  | 1 | S04 |
| .....aaauuaccgacggaauuccga.....                                                                                | 44 | 0 | S04 |
| .....aaCauaccgacggaauuccga.....                                                                                | 1  | 1 | S04 |
| .....aaauuaccgacggaauuccUa.....                                                                                | 1  | 1 | S04 |
| .....aaauuaccgacggaauuccgG.....                                                                                | 3  | 1 | S04 |
| .....aaauuaccgacggaauuccgag.....                                                                               | 49 | 0 | S04 |
| .....aaauuaccgacggaauuccgUg.....                                                                               | 1  | 1 | S04 |
| .....aaauuaccgacggaauuccgagg.....                                                                              | 2  | 0 | S04 |
| .....aaauuaccgacggaauuccgagC.....                                                                              | 1  | 1 | S04 |
| .....aaauuaccgacggaauuccgagga.....                                                                             | 5  | 0 | S04 |
| .....aaauuaccgacggaauuccc.....                                                                                 | 1  | 1 | S04 |
| .....aaauuaccgacggaauuccg.....                                                                                 | 3  | 0 | S04 |
| .....aaauuaccgacggaauuccgG.....                                                                                | 1  | 1 | S04 |
| .....aaauuaccgacggaauuccga.....                                                                                | 24 | 0 | S04 |
| .....aaauuaccgacggaauuccgag.....                                                                               | 14 | 0 | S04 |
| .....aaauuaccgacggaauuccgagC.....                                                                              | 12 | 1 | S04 |
| .....aaauuaccgacggaauuccgagg.....                                                                              | 10 | 0 | S04 |
| .....aaauuaccgacggaauuccgagga.....                                                                             | 1  | 1 | S04 |
| .....aaauuaccgacggaauuccg.....                                                                                 | 1  | 0 | S04 |
| .....aaauuaccgacggaauuccga.....                                                                                | 7  | 0 | S04 |
| .....aaauuaccgacggaauuccgag.....                                                                               | 1  | 0 | S04 |
| .....aaauuaccgacggaauuccgagg.....                                                                              | 2  | 0 | S04 |
| .....aaauuaccgacggaauuccga.....                                                                                | 5  | 0 | S04 |
| .....aaauuaccgacggaauuccgag.....                                                                               | 6  | 0 | S04 |
| .....aaauuaccgacggaauuccgagg.....                                                                              | 3  | 0 | S04 |
| .....aaauuaccgacggaauuccgag.....                                                                               | 1  | 0 | S04 |
| .....aaauuaccgacggaauuccgagg.....                                                                              | 1  | 0 | S04 |
| .....aaauuaccgacggaauuccgagga.....                                                                             | 1  | 0 | S04 |
| .....aaauuaccgacggaauuccCaggaaau.....                                                                          | 1  | 1 | S04 |
| .....aaauuaccgacggaauuccgagga.....                                                                             | 1  | 0 | S04 |
| .....aaauuaccgacggaauuccgagga.....                                                                             | 3  | 0 | S04 |
| .....aaauuaccgacggaauuccgagga.....                                                                             | 2  | 0 | S04 |
| .....aaauuaccgacggaauuccgaggaau.....                                                                           | 4  | 0 | S04 |
| .....aaauuaccgacggaauuccgagga.....                                                                             | 5  | 0 | S04 |
| .....aaauuaccgacggaauuccgaggaau.....                                                                           | 6  | 0 | S04 |
| .....aaauuaccgacggaauuccgaggaaua.....                                                                          | 4  | 0 | S04 |
| .....aaauuaccgacggaauuccgaggaaua.....                                                                          | 1  | 0 | S04 |





**Mature**

**Star**

|                                                                                                                                                                             |   |   |     |
|-----------------------------------------------------------------------------------------------------------------------------------------------------------------------------|---|---|-----|
| auuuggcggcugguugcccgguaaaaugaa <u>aa</u> uuuucgagga <u>aa</u> uuccgacagacacuu <u>aa</u> uuucggucgga <u>uu</u> uccucggu <u>augu</u> ucauu <u>aa</u> cucgagga <u>aaa</u> agaa |   |   |     |
| .....agga <u>aa</u> uuccgacagaca.....                                                                                                                                       | 1 | 0 | S04 |
| .....cggucgga <u>uu</u> uccucggu.....                                                                                                                                       | 1 | 0 | S04 |
| .....ucgga <u>aa</u> uuuccucggu <u>aug</u> .....                                                                                                                            | 1 | 1 | S04 |
| .....ucgga <u>uu</u> uccucggu <u>augu</u> .....                                                                                                                             | 1 | 0 | S04 |
| .....cggaa <u>uu</u> uccucggu <u>aug</u> .....                                                                                                                              | 1 | 0 | S04 |
| .....cggaa <u>uu</u> uccucggu <u>augu</u> .....                                                                                                                             | 1 | 0 | S04 |
| .....gga <u>uu</u> uccucggu <u>augu</u> .....                                                                                                                               | 1 | 0 | S04 |
| .....aa <u>uu</u> uccucggu <u>augu</u> cauu.....                                                                                                                            | 1 | 0 | S04 |



Provisional ID : chrC01\_1094641  
 Score total : 0.9  
 Score for star read(s) : -1.3  
 Score for read counts : 0  
 Score for mfe : 2.2  
 Score for randfold : 0  
 Score for cons. seed :  
 Total read count : 27  
 Mature read count : 26  
 Loop read count : 0  
 Star read count : 1

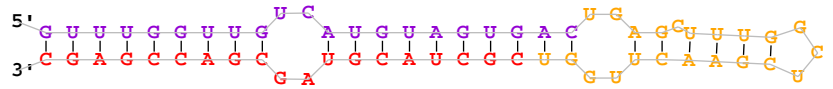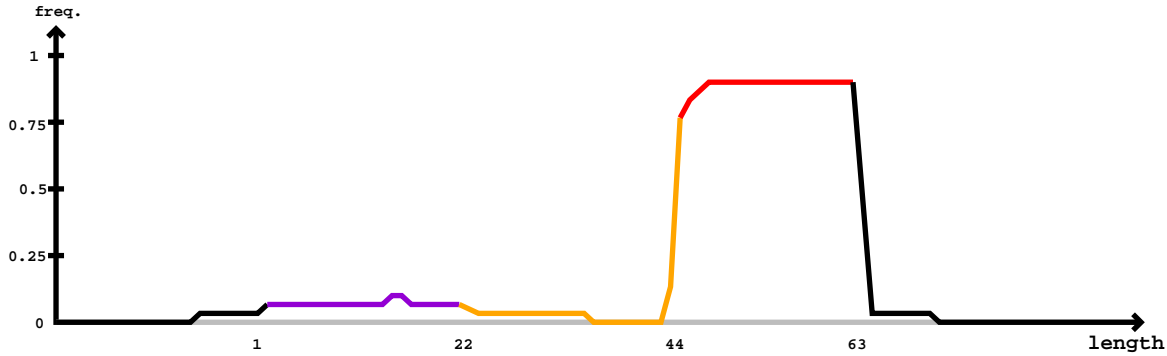

**Star**

**Mature**

| 5' -                 | Star                  | Mature                                    | -3'                         | obs | exp | reads | mm | sample |
|----------------------|-----------------------|-------------------------------------------|-----------------------------|-----|-----|-------|----|--------|
| agcgaccgagcggaaugggc | guuugguugucauguagugac | ugagcuuuggcucgaacuuggucgcuacguagcgaccgagc | ggagcacacguuugucgugcguaacga | 1   | 0   | 1     | 0  | S03    |
| agcgaccgagcggaaugggc | guuugguugucauguagugac | ugagcuuuggcucgaacuuggucgcuacguagcgaccgagc | ggagcacacguuugucgugcguaacga | 3   | 0   | 3     | 0  | S03    |
| .....                | .....                 | .....                                     | .....                       | 17  | 0   | 17    | 0  | S03    |
| .....                | .....                 | .....                                     | .....                       | 1   | 0   | 1     | 0  | S03    |
| .....                | .....                 | .....                                     | .....                       | 1   | 1   | 1     | 1  | S03    |
| .....                | .....                 | .....                                     | .....                       | 1   | 0   | 1     | 0  | S03    |
| .....                | .....                 | .....                                     | .....                       | 1   | 0   | 1     | 0  | S03    |
| .....                | .....                 | .....                                     | .....                       | 1   | 0   | 1     | 0  | S03    |
| .....                | .....                 | .....                                     | .....                       | 1   | 1   | 1     | 1  | S04    |
| .....                | .....                 | .....                                     | .....                       | 1   | 0   | 1     | 0  | S04    |
| .....                | .....                 | .....                                     | .....                       | 1   | 0   | 1     | 0  | S04    |
| .....                | .....                 | .....                                     | .....                       | 1   | 0   | 1     | 0  | S04    |
| .....                | .....                 | .....                                     | .....                       | 1   | 0   | 1     | 0  | S04    |
| .....                | .....                 | .....                                     | .....                       | 1   | 1   | 1     | 1  | S04    |





Provisional ID : chrC01\_1113776  
 Score total : 0.3  
 Score for star read(s) : 3.9  
 Score for read counts : -4.9  
 Score for mfe : 1.4  
 Score for randfold : 0  
 Score for cons. seed :  
 Total read count : 2  
 Mature read count : 1  
 Loop read count : 0  
 Star read count : 1

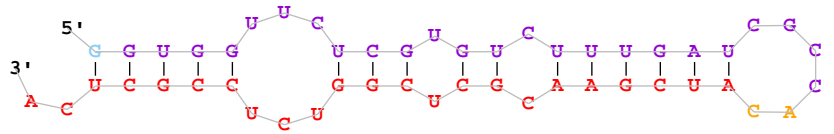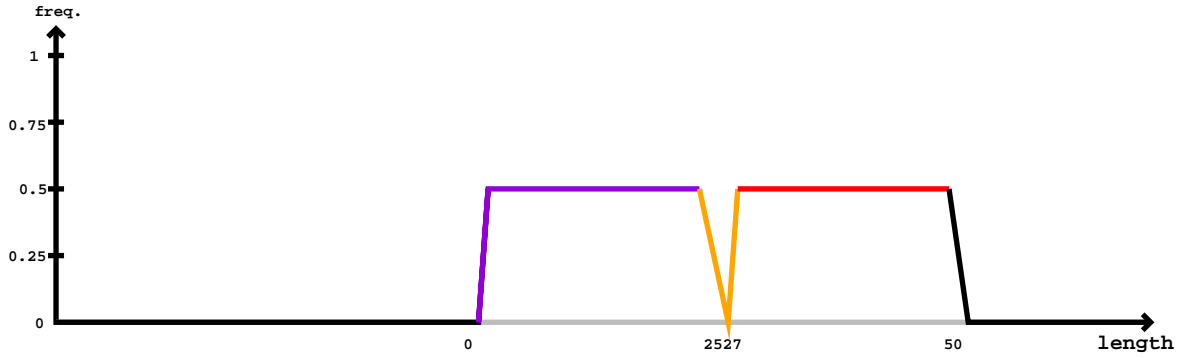

**Star** **Mature**

|      |                                                                                       |                          |                      |     |     |   |     |
|------|---------------------------------------------------------------------------------------|--------------------------|----------------------|-----|-----|---|-----|
| 5' - | cgccaaauucgguuugucgguucucgacggcuacgggcauguggugguucucgugucuuugaucgcca                  | caucgaacgcucggucuccgcuca | caucccagcaccucguaggu | -3' | obs |   |     |
|      | cgccaaauucgguuugucgguucucgacggcuacgggcaugugugguucucgugucuuugaucgcca                   | caucgaacgcucggucuccgcuca | caucccagcaccucguaggu |     | exp |   |     |
|      | .(((.....(((.....))))).(((.....(((.....(((.....(((.....(((.....)))))))).)))))).....)) |                          |                      |     |     |   |     |
|      | .....aucgaacgcucggucuccgcucG.....                                                     |                          |                      |     |     |   |     |
|      |                                                                                       | 1                        |                      | 1   |     | 1 | S03 |
|      | .....gugguucucgugucuuugaucgca.....                                                    |                          |                      |     |     |   |     |
|      |                                                                                       | 1                        |                      | 1   |     | 1 | S04 |















Star

Mature

|                                                                        |                                         |    |   |     |
|------------------------------------------------------------------------|-----------------------------------------|----|---|-----|
| ggaacugugaaguuaccguggccuagugguuauagcacaacaugauugucacaacccguguucgaagacc | cauuacgcucuguuugacuuuuuuuuuguuuuuucauua |    |   |     |
| .....gugaaguuaccguggccuaguggA.....                                     | .....gugaaguuaccguggccuaguggG.....      | 1  | 1 | S04 |
| .....gugaaguuaccguggccuaguggA.....                                     | .....gugaaguuaccguggccuaguggG.....      | 1  | 1 | S04 |
| .....gugaaguuaccguggccuaguggu.....                                     | .....gugaaguuaccguggccuaguggA.....      | 3  | 0 | S04 |
| .....gugaaguuaccguggccuaguggA.....                                     | .....gugaaguuaccguggccuaguggu.....      | 1  | 1 | S04 |
| .....gaaguuaccguggccuaguggA.....                                       | .....gaaguuaccguggccuaguggu.....        | 1  | 1 | S04 |
| .....gaaguuaccguggccuaguggu.....                                       | .....gaaguuaccguggccuaguggA.....        | 1  | 1 | S04 |
| .....gaaguuaccguggccuaguggu.....                                       | .....gaaguuaccguggccuaguggA.....        | 2  | 0 | S04 |
| .....aguuaccguggccuaguggA.....                                         | .....aguuaccguggccuaguggu.....          | 1  | 1 | S04 |
| .....aguuaccguggccuaguggu.....                                         | .....aguuaccguggccuaguggA.....          | 1  | 0 | S04 |
| .....acccguguucgaagacc                                                 | cauuacgcucugu.....                      | 1  | 0 | S04 |
| .....cgaagacc                                                          | cauuacgcucuguuuuga.....                 | 1  | 0 | S04 |
| .....gaagacc                                                           | cauuacgcucuguuugacuuuu.....             | 1  | 0 | S04 |
| .....acc                                                               | cauuacgcucuguuugacuuu.....              | 1  | 0 | S04 |
| .....cauuacgcucuguuugacC.....                                          | .....cauuacgcucuguuugacu.....           | 1  | 1 | S04 |
| .....cauuacgcucuguuugacu.....                                          | .....cauuacgcucuguuugacu.....           | 2  | 0 | S04 |
| .....cGuuacgcucuguuugacuuu.....                                        | .....cauuacgcucuguuugacuuu.....         | 1  | 1 | S04 |
| .....cauuacgcucuguuugacuuu.....                                        | .....cauuacgcucuguuugacuuu.....         | 2  | 0 | S04 |
| .....cauuacgcucuguuugacuuC.....                                        | .....cauuacgcucuguuugacuuu.....         | 1  | 1 | S04 |
| .....cauuacgcucuguuugacuuuu.....                                       | .....cauuacgcucuguuugacuuuA.....        | 14 | 0 | S04 |
| .....cauuacgcucuguuugacuuuA.....                                       | .....cauuacgcAcuguuugacuuuu.....        | 1  | 1 | S04 |
| .....cauuacgcAcuguuugacuuuu.....                                       | .....cauuacgcucuguuugacuuu.....         | 1  | 1 | S04 |
| .....cauuacgcucuguuugacuuu.....                                        | .....cauuacgcucuguuugacuuuG.....        | 1  | 1 | S04 |
| .....cauuacgcucuguuugacuuuGu.....                                      | .....cauuacgcucuguuugacuuuA.....        | 1  | 1 | S04 |
| .....cauuacgcucuguuugacuuuA.....                                       | .....cauuacgcucuguuugacuuuu.....        | 3  | 1 | S04 |
| .....cauuacgcucuguuugacuuuu.....                                       | .....cauuacgcucuguuugacuuuuC.....       | 8  | 0 | S04 |
| .....cauuacgcucuguuugacuuuuC.....                                      | .....cauuacgcucuguuCgacuuuu.....        | 2  | 1 | S04 |
| .....cauuacgcucuguuCgacuuuu.....                                       | .....auuacgcucuguuugacuuuu.....         | 1  | 1 | S04 |
| .....auuacgcucuguuugacuuuu.....                                        | .....auuacgcucuguuugacuuuuA.....        | 4  | 0 | S04 |
| .....auuacgcucuguuugacuuuuA.....                                       | .....auuacgcucuguuugacuuuu.....         | 1  | 1 | S04 |
| .....auuacgcucuguuugacuuuu.....                                        | .....auuacgcucuguuugacuuuuuG.....       | 1  | 0 | S04 |
| .....auuacgcucuguuugacuuuuuG.....                                      | .....auuacgcucuguuugacuuuu.....         | 1  | 1 | S04 |
| .....auuacgcucuguuugacuuuu.....                                        | .....auuacgcucuguuugacuuuuu.....        | 3  | 0 | S04 |
| .....auuacgcucuguuugacuuuuA.....                                       | .....uuacgcucuguuugacuuu.....           | 1  | 1 | S04 |
| .....uuacgcucuguuugacuuu.....                                          | .....uuacgcucuguuugacuuuu.....          | 1  | 0 | S04 |
| .....uuacgcucuguuugacuuuu.....                                         | .....uuacgcucuguuugacuuuA.....          | 2  | 0 | S04 |
| .....uuacgcucuguuugacuuuA.....                                         | .....uuacgcucuguuugacuuuGu.....         | 2  | 1 | S04 |
| .....uuacgcucuguuugacuuuGu.....                                        | .....uuacgcucuguuugacuuuuC.....         | 1  | 1 | S04 |
| .....uuacgcucuguuugacuuuuC.....                                        | .....uacgcucuguuugacuuuu.....           | 1  | 1 | S04 |
| .....uacgcucuguuugacuuuu.....                                          | .....acgcucuguuugacuuuu.....            | 2  | 0 | S04 |
| .....acgcucuguuugacuuuu.....                                           | .....acgcucuguuugacuuuu.....            | 1  | 0 | S04 |
| .....acgcucuguuugacuuuu.....                                           | .....acgcucuguuugacuuuuC.....           | 2  | 0 | S04 |
| .....acgcucuguuugacuuuuC.....                                          | .....acgcucuguuugacuuuu.....            | 1  | 1 | S04 |



Provisional ID : chrC02\_1153123  
 Score total : 0.4  
 Score for star read(s) : -1.3  
 Score for read counts : 0  
 Score for mfe : 1.7  
 Score for randfold : 0  
 Score for cons. seed :  
 Total read count : 169  
 Mature read count : 168  
 Loop read count : 1  
 Star read count : 0

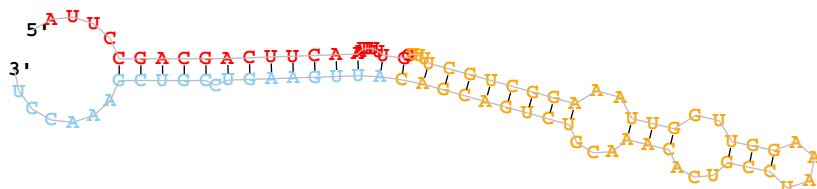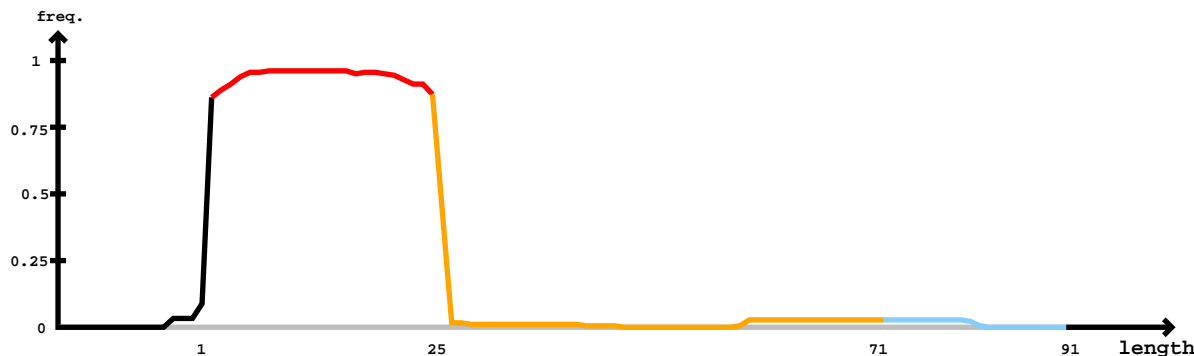

**Mature**

**Star**

| 5' -                                                                                                                                                                                                                                       | reads | mm | sample |
|--------------------------------------------------------------------------------------------------------------------------------------------------------------------------------------------------------------------------------------------|-------|----|--------|
| aaauggccggcgga <u>aa<u>uuc</u>cgacgac<u>uuca</u>aaa<u>uuuu</u>gg<u>uuuu</u>ucgucgga<u>aa<u>u</u>gg<u>uu</u>gg<u>aaa</u>uucgucacaa<u>ac</u>gucgacgac<u>aa<u>u</u>ga<u>ag</u>u<u>cc</u>gucgaa<u>acc</u>u<u>cc</u>gucgaa<u>uu</u></u></u></u> | 1     | 0  | S03    |
| .cgga <u>aa</u> uucgacgac <u>uuca</u>                                                                                                                                                                                                      | 1     | 0  | S03    |
| .cgga <u>aa</u> uucgacgac <u>uuca</u> aaa                                                                                                                                                                                                  | 1     | 0  | S03    |
| .cgga <u>aa</u> uucgacgac <u>uuca</u> aaa <u>uu</u>                                                                                                                                                                                        | 2     | 0  | S03    |
| . <u>aa</u> uucgacgac <u>uuca</u> aaa <u>uu</u>                                                                                                                                                                                            | 1     | 0  | S03    |
| . <u>aa</u> uucgacgac <u>uuca</u> aaa <u>uuuu</u>                                                                                                                                                                                          | 1     | 0  | S03    |
| . <u>aa</u> uucgacgac <u>uuca</u> aaa <u>uuuuu</u> C                                                                                                                                                                                       | 1     | 1  | S03    |
| . <u>aa</u> uucgacgac <u>uuca</u> aaa <u>uuuuu</u> g                                                                                                                                                                                       | 1     | 0  | S03    |
| . <u>aa</u> uucgacgac <u>uuca</u> aaa <u>uuuu</u>                                                                                                                                                                                          | 2     | 0  | S03    |
| . <u>aa</u> uucgacgac <u>uuca</u> aaa <u>uuuu</u> Gg                                                                                                                                                                                       | 1     | 1  | S03    |
| . <u>G</u> uucgacgac <u>uuca</u> aaa <u>uuuu</u> gg                                                                                                                                                                                        | 1     | 1  | S03    |
| . <u>aa</u> uucgacgac <u>uuca</u> aaa <u>uuuu</u> Cugg                                                                                                                                                                                     | 1     | 1  | S03    |
| . <u>aa</u> uucgacgac <u>uuca</u> aaa <u>uuuu</u> GA                                                                                                                                                                                       | 6     | 1  | S03    |
| . <u>aa</u> uucgacgC <u>uuca</u> aaa <u>uuuu</u> gg                                                                                                                                                                                        | 1     | 1  | S03    |
| . <u>a</u> Cuucgacgac <u>uuca</u> aaa <u>uuuu</u> gg                                                                                                                                                                                       | 1     | 1  | S03    |
| . <u>aa</u> uucgacg <u>uuca</u> aaa <u>uuuu</u> gg                                                                                                                                                                                         | 1     | 1  | S03    |
| . <u>aa</u> uucgacgac <u>uuca</u> aaa <u>uuuu</u> gg                                                                                                                                                                                       | 51    | 0  | S03    |
| . <u>uu</u> ucgacgac <u>uuca</u> aaa <u>uuuu</u> gg                                                                                                                                                                                        | 1     | 0  | S03    |
| . <u>cc</u> gacgac <u>uuca</u> aaa <u>uuuu</u> gg                                                                                                                                                                                          | 1     | 0  | S03    |
| . <u>uuuuu</u> gg <u>uuuu</u> ucgucgga <u>uuuu</u>                                                                                                                                                                                         | 1     | 0  | S03    |
| . <u>uuuuu</u> ucgucgga <u>uuuu</u> Cg <u>uuuu</u>                                                                                                                                                                                         | 1     | 1  | S03    |
| . <u>aa</u> acgucgacgac <u>uuca</u> uu <u>ga</u> u <u>cc</u>                                                                                                                                                                               | 2     | 0  | S03    |
| .cgga <u>aa</u> uucgacgac <u>uuca</u>                                                                                                                                                                                                      | 1     | 0  | S04    |
| .cgga <u>aa</u> uucgacgac <u>uuca</u> aaa                                                                                                                                                                                                  | 1     | 0  | S04    |
| . <u>aa</u> uucgacgac <u>uuca</u> aaa <u>uuuu</u> g                                                                                                                                                                                        | 3     | 0  | S04    |
| . <u>aa</u> uucgacgac <u>uuca</u> aaa <u>uuuu</u> gg                                                                                                                                                                                       | 1     | 1  | S04    |
| . <u>aa</u> uucgacgac <u>uuca</u> aaa <u>uuuu</u> gg                                                                                                                                                                                       | 2     | 0  | S04    |
| . <u>aa</u> uucgacgac <u>uuca</u> aaa <u>uuuuu</u> A                                                                                                                                                                                       | 1     | 1  | S04    |
| . <u>au</u> Gccgacgac <u>uuca</u> aaa <u>uuuu</u> gg                                                                                                                                                                                       | 1     | 1  | S04    |
| . <u>aa</u> uucgacgac <u>uuca</u> aaa <u>uuuu</u> gg                                                                                                                                                                                       | 1     | 1  | S04    |
| . <u>aa</u> uucgacgac <u>uuca</u> aaa <u>uuuu</u> gU                                                                                                                                                                                       | 1     | 1  | S04    |
| . <u>aa</u> uucgacgac <u>uuca</u> aaa <u>uuuu</u> gg                                                                                                                                                                                       | 57    | 0  | S04    |
| . <u>aa</u> uucgacgac <u>uuca</u> aaa <u>uuuu</u> gA                                                                                                                                                                                       | 10    | 1  | S04    |
| . <u>aa</u> uucgacgC <u>uuca</u> aaa <u>uuuu</u> gg                                                                                                                                                                                        | 1     | 1  | S04    |

Mature

Star

|                                                                                                                                    |   |   |     |
|------------------------------------------------------------------------------------------------------------------------------------|---|---|-----|
| aaauggcggcgga <u>auccgacgacuucaaaUUUUUUGG</u> UUUUUCGUGGAAUUGGUUGGAAAUCCGUCACAAACGUCUGACGAC <u>AUUGAAGUCCGUCGAAACCU</u> CCGUCGAAAU |   |   |     |
| .....auccgacgacuucaaaGUUUUUGG.....                                                                                                 | 1 | 1 | S04 |
| .....auccgacgUcucaaaUUUUUUGG.....                                                                                                  | 1 | 1 | S04 |
| .....auCCcgacgacuucaaaUUUUUUGG.....                                                                                                | 1 | 1 | S04 |
| .....uuccgacgacuucaaaUUUUUUGG.....                                                                                                 | 1 | 1 | S04 |
| .....uuccgacgacuucaaaUUUUUUGG.....                                                                                                 | 2 | 0 | S04 |
| .....uuccgacgacuucaaaUUUUUUGA.....                                                                                                 | 1 | 1 | S04 |
| .....uccgacgacuucaaaUUUUUUGG.....                                                                                                  | 3 | 0 | S04 |
| .....uccgacgacuucaaaUUUUUUGA.....                                                                                                  | 1 | 1 | S04 |
| .....ccgacgacuucaaaUUUUUUGG.....                                                                                                   | 3 | 0 | S04 |
| .....ccgacgacuucaaaUUUUUUGG <u>GUU</u> .....                                                                                       | 1 | 1 | S04 |
| .....cgacgacuucaaaUUUUUUGG.....                                                                                                    | 3 | 0 | S04 |
| .....acgacuucaaaUUUUUUGG.....                                                                                                      | 1 | 0 | S04 |
| .....caaacgucugacgacauugaaguc.....                                                                                                 | 1 | 0 | S04 |
| .....aaacgucugacgacauugaagucc.....                                                                                                 | 1 | 0 | S04 |
| .....aaacgucugacgacauugaaguccU.....                                                                                                | 1 | 1 | S04 |



Provisional ID : chrC02\_1156554  
 Score total : 0.3  
 Score for star read(s) : -1.3  
 Score for read counts : 0  
 Score for mfe : 1.6  
 Score for randfold : 0  
 Score for cons. seed :  
 Total read count : 146  
 Mature read count : 145  
 Loop read count : 0  
 Star read count : 1

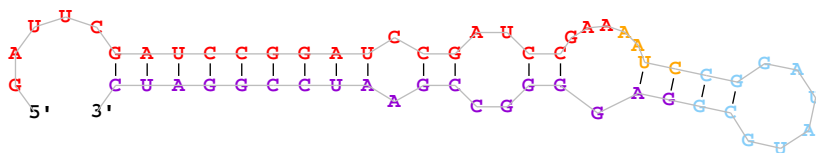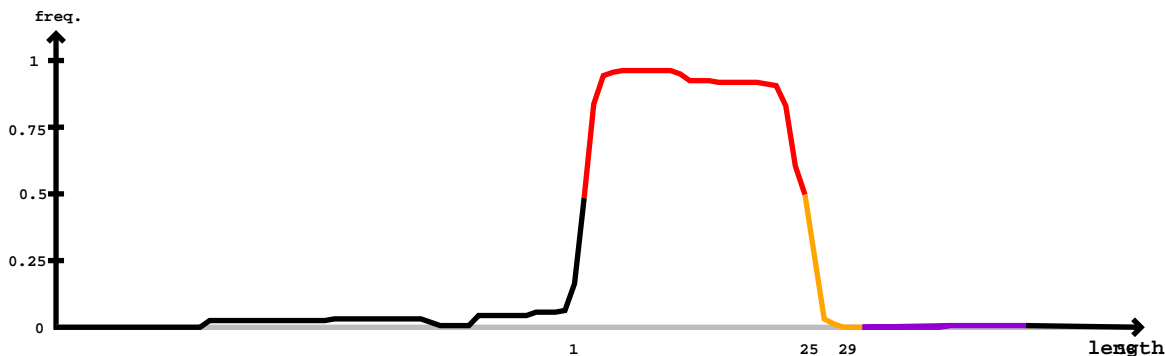

|        |                                   | Mature                      | Star                        |                             | obs   |    |        |
|--------|-----------------------------------|-----------------------------|-----------------------------|-----------------------------|-------|----|--------|
| 5'     |                                   |                             |                             | -3'                         | reads | mm | sample |
| aaaauu | aagugcaaggccugaaacuuuuu           | aucgagaucuggauucgauc        | cggaauucggauc               | cggaauucggauc               |       |    |        |
| aaaauu | aagugcaaggccugaaacuuuuu           | aucgagaucuggauucgauc        | cggaauucggauc               | cggaauucggauc               |       |    |        |
| .....  | (((((.....)))..))..((((.....))).. | (((.....)))..((((.....))).. | (((.....)))..((((.....))).. | (((.....)))..((((.....))).. |       |    |        |
| .....  | aggccugaaacuuuuu                  | aucgagau.....               | .....                       | .....                       | 1     | 0  | S03    |
| .....  | aggccugaaacuuuuu                  | Auauucgagau.....            | .....                       | .....                       | 1     | 1  | S03    |
| .....  | .....                             | auucgauucgagauucgauc        | .....                       | .....                       | 1     | 0  | S03    |
| .....  | .....                             | auucgauucgagauucggauc       | .....                       | .....                       | 2     | 0  | S03    |
| .....  | .....                             | ucgagauucggaucggauc         | .....                       | .....                       | 1     | 0  | S03    |
| .....  | .....                             | gagauucggaucggauc           | .....                       | .....                       | 1     | 0  | S03    |
| .....  | .....                             | gagauucggaucggaucggauc      | .....                       | .....                       | 1     | 0  | S03    |
| .....  | .....                             | gagauucggaucggaucggauc      | .....                       | .....                       | 1     | 0  | S03    |
| .....  | .....                             | gagauucggaucggaucggauc      | .....                       | .....                       | 7     | 0  | S03    |
| .....  | .....                             | gagauucggaucggaucggauc      | .....                       | .....                       | 1     | 1  | S03    |
| .....  | .....                             | gagauucggaucggaucggauc      | .....                       | .....                       | 1     | 1  | S03    |
| .....  | .....                             | gagauucggaucggaucggauc      | .....                       | .....                       | 3     | 0  | S03    |
| .....  | .....                             | gagauucggaucggaucggauc      | .....                       | .....                       | 1     | 0  | S03    |
| .....  | .....                             | gagauucggaucggaucggauc      | .....                       | .....                       | 4     | 0  | S03    |
| .....  | .....                             | gagauucggaucggaucggauc      | .....                       | .....                       | 4     | 0  | S03    |
| .....  | .....                             | gagauucggaucggaucggauc      | .....                       | .....                       | 1     | 1  | S03    |
| .....  | .....                             | gagauucggaucggaucggauc      | .....                       | .....                       | 5     | 0  | S03    |
| .....  | .....                             | gagauucggaucggaucggauc      | .....                       | .....                       | 30    | 0  | S03    |
| .....  | .....                             | gagauucggaucggaucggauc      | .....                       | .....                       | 1     | 1  | S03    |
| .....  | .....                             | gagauucggaucggaucggauc      | .....                       | .....                       | 1     | 0  | S03    |
| .....  | .....                             | gagauucggaucggaucggauc      | .....                       | .....                       | 1     | 0  | S03    |
| .....  | .....                             | gagauucggaucggaucggauc      | .....                       | .....                       | 1     | 0  | S03    |
| .....  | .....                             | gagauucggaucggaucggauc      | .....                       | .....                       | 4     | 0  | S03    |
| .....  | .....                             | gagauucggaucggaucggauc      | .....                       | .....                       | 14    | 0  | S03    |
| .....  | .....                             | gagauucggaucggaucggauc      | .....                       | .....                       | 1     | 1  | S03    |
| .....  | .....                             | gagauucggaucggaucggauc      | .....                       | .....                       | 2     | 0  | S03    |
| .....  | .....                             | gagauucggaucggaucggauc      | .....                       | .....                       | 4     | 0  | S03    |
| .....  | .....                             | gagauucggaucggaucggauc      | .....                       | .....                       | 20    | 0  | S03    |
| .....  | .....                             | gagauucggaucggaucggauc      | .....                       | .....                       | 1     | 1  | S03    |
| .....  | .....                             | gagauucggaucggaucggauc      | .....                       | .....                       | 1     | 1  | S03    |
| .....  | .....                             | gagauucggaucggaucggauc      | .....                       | .....                       | 1     | 1  | S03    |
| .....  | .....                             | gagauucggaucggaucggauc      | .....                       | .....                       | 2     | 0  | S03    |
| .....  | .....                             | gagauucggaucggaucggauc      | .....                       | .....                       | 1     | 1  | S03    |
| .....  | .....                             | gagauucggaucggaucggauc      | .....                       | .....                       | 2     | 0  | S03    |











Mature

Star

| Sequence                                                                                                          | Count | Count | Category |
|-------------------------------------------------------------------------------------------------------------------|-------|-------|----------|
| caaggaccagcgugcugaguccaaggaccagcgugcugaguccaaggaccagcgugcugaguccaaggaccagcgugcugaguccaaggaccagcgugcugaguccaaggacc |       |       |          |
| .....agcgugcugaguccaaggaccU.....                                                                                  | 3     | 1     | S03      |
| .....gcgugcugaguccaaggacc.....                                                                                    | 6     | 0     | S03      |
| .....gcgugcugaguccaaggacca.....                                                                                   | 3     | 0     | S03      |
| .....cgugcugaguccaaggacc.....                                                                                     | 9     | 0     | S03      |
| .....cgugcugaguccaaggacca.....                                                                                    | 6     | 0     | S03      |
| .....cugaguccaaggaccagcgug.....                                                                                   | 3     | 0     | S03      |
| .....cugaUuccaaggaccagcgug.....                                                                                   | 3     | 1     | S03      |
| .....cugaguccaaggaccUgcgugc.....                                                                                  | 3     | 1     | S03      |
| .....ugaguccaaggaccagcgug.....                                                                                    | 9     | 0     | S03      |
| .....aaggaccagcgugcugag.....                                                                                      | 5     | 0     | S03      |
| .....ccagcgugcugaguccaaggC.....                                                                                   | 4     | 1     | S03      |
| .....ccagcgugcugaguccaaggacc.....                                                                                 | 3     | 0     | S03      |
| .....ccagcgugcugaguccaaggacca.....                                                                                | 3     | 1     | S03      |
| .....ccagcgugcugaguccaaggacca.....                                                                                | 3     | 0     | S03      |
| .....cagcgugcugaguccaaggacc.....                                                                                  | 8     | 0     | S03      |
| .....cagcgugcugaguccaaggacc.....                                                                                  | 102   | 0     | S03      |
| .....cUgcgugcugaguccaaggacc.....                                                                                  | 3     | 1     | S03      |
| .....agcgugcugaguccaaggacc.....                                                                                   | 4     | 0     | S03      |
| .....agcgugcugaguccaaggacc.....                                                                                   | 3     | 1     | S03      |
| .....agcgugcugaguccaaggacc.....                                                                                   | 42    | 0     | S03      |
| .....agcgugcugaguccaaggacca.....                                                                                  | 21    | 0     | S03      |
| .....agcgugcugaguccaaggaccU.....                                                                                  | 3     | 1     | S03      |
| .....gcgugcugaguccaaggacc.....                                                                                    | 6     | 0     | S03      |
| .....gcgugcugaguccaaggacca.....                                                                                   | 3     | 0     | S03      |
| .....cgugcugaguccaaggacc.....                                                                                     | 9     | 0     | S03      |
| .....cgugcugaguccaaggacca.....                                                                                    | 6     | 0     | S03      |
| .....cugaUuccaaggaccagcgug.....                                                                                   | 3     | 1     | S03      |
| .....cugaguccaaggaccagcgug.....                                                                                   | 3     | 0     | S03      |
| .....cugaguccaaggaccUgcgugc.....                                                                                  | 3     | 1     | S03      |
| .....ugaguccaaggaccagcgug.....                                                                                    | 9     | 0     | S03      |
| .....aaggaccagcgugcugag.....                                                                                      | 5     | 0     | S03      |
| .....aaggaccagcgugcugag.....                                                                                      | 5     | 0     | S03      |
| .....ccagcgugcugaguccaaggC.....                                                                                   | 4     | 1     | S03      |
| .....cagcgugcugaguccaaggacc.....                                                                                  | 8     | 0     | S03      |
| .....agcgugcugaguccaaggacc.....                                                                                   | 4     | 0     | S03      |
| caaggaccagcgugcugU.....                                                                                           | 5     | 1     | S04      |
| caaggaccagUgugcugag.....                                                                                          | 5     | 1     | S04      |
| aaggaccagcgugcugagA.....                                                                                          | 5     | 1     | S04      |
| .....ccagcgugcugaguccaaggga.....                                                                                  | 4     | 0     | S04      |
| .....ccagcgugcugaguccaaggacc.....                                                                                 | 4     | 1     | S04      |
| .....ccagcgugcugaguccaaggacc.....                                                                                 | 4     | 0     | S04      |
| .....ccagcgugcugaguccaaggaccG.....                                                                                | 3     | 1     | S04      |
| .....ccagcgugcugaguccaaggaccA.....                                                                                | 6     | 1     | S04      |
| .....ccagcgugcugaguccaaggacc.....                                                                                 | 51    | 0     | S04      |
| .....ccagcgugcugaguccaaggaccC.....                                                                                | 6     | 1     | S04      |
| .....ccagcgugcugaguccaaggaccU.....                                                                                | 6     | 1     | S04      |
| .....ccagcgugcugaguccaaggacca.....                                                                                | 12    | 0     | S04      |
| .....cagcgugcugaguccaaggga.....                                                                                   | 12    | 0     | S04      |
| .....cagcgugcugaguccaaggacc.....                                                                                  | 20    | 0     | S04      |
| .....cagcgugcugaguccaaggacc.....                                                                                  | 3     | 1     | S04      |
| .....cUgcgugcugaguccaaggacc.....                                                                                  | 6     | 1     | S04      |
| .....cagcgugcugaguccaaggacc.....                                                                                  | 546   | 0     | S04      |
| .....cagcgugcugaguccaaggacc.....                                                                                  | 4     | 1     | S04      |
| .....cagcgugcugaguccaaggaccG.....                                                                                 | 9     | 1     | S04      |
| .....cagcgugcugaguccaaggacca.....                                                                                 | 36    | 0     | S04      |
| .....cagcgugcugaguccaaggaccU.....                                                                                 | 18    | 1     | S04      |
| .....agcgugcugaguccaagg.....                                                                                      | 4     | 0     | S04      |
| .....agcgugcugaguccaaggga.....                                                                                    | 4     | 0     | S04      |
| .....agcgugcugaguccaaggacc.....                                                                                   | 16    | 0     | S04      |
| .....agcgugcugaguccaaggaccG.....                                                                                  | 3     | 1     | S04      |
| .....agcgugcugaguccaaggacc.....                                                                                   | 255   | 0     | S04      |
| .....agcgugcugaguccaaggaccU.....                                                                                  | 24    | 1     | S04      |
| .....agcgugcugaguccaaggacca.....                                                                                  | 105   | 0     | S04      |
| .....gcgugcugaguccaaggacc.....                                                                                    | 4     | 0     | S04      |
| .....gcgugcugaguccaaggacc.....                                                                                    | 24    | 0     | S04      |
| .....gcgugcugaguccaaggacca.....                                                                                   | 3     | 0     | S04      |
| .....cgugcugaguccaaggacc.....                                                                                     | 4     | 0     | S04      |
| .....cgugcugaguccaaggacc.....                                                                                     | 54    | 0     | S04      |
| .....cgugcugaguccaaggaccG.....                                                                                    | 3     | 1     | S04      |



Mature

Star

caaggaccagcgugcugaguccaaggaccagcgugcugaguccaaggaccagcgugcugaguccaaggaccagcgugcugaguccaaggaccagcgugcugaguccaaggacc

|                                    |     |   |     |
|------------------------------------|-----|---|-----|
| .....ugaguccaaggaccagcgugcuga..... | 9   | 0 | S04 |
| .....gaguccaaggaccagcgug.....      | 3   | 0 | S04 |
| .....gaguccaaggaccagcgugcG.....    | 3   | 1 | S04 |
| .....gaguccaaggaccagcgugcu.....    | 3   | 0 | S04 |
| .....aguccaaggaccagcgugcug.....    | 3   | 0 | S04 |
| .....aguccaaggaccagcgugcuga.....   | 12  | 0 | S04 |
| .....aguccaaggaccagcgugcugU.....   | 3   | 1 | S04 |
| .....aguccaaggaccagcgugcugagu..... | 2   | 1 | S04 |
| .....aguccaaggaccagcgugcugagu..... | 2   | 0 | S04 |
| .....uccaaggaccagcgugcugagu.....   | 8   | 0 | S04 |
| .....caaggaccagcgugcugU.....       | 5   | 1 | S04 |
| .....caaggaccagUgucugag.....       | 5   | 1 | S04 |
| .....aaggaccagcgugcugagA.....      | 5   | 1 | S04 |
| .....ccagcgugcugaguccaagga.....    | 4   | 0 | S04 |
| .....ccagcgugcugaguccaaggacc.....  | 4   | 0 | S04 |
| .....ccagcgugcuAaguccaaggacc.....  | 4   | 1 | S04 |
| .....ccagcgugcugaguccaaggaccA..... | 6   | 1 | S04 |
| .....ccagcgugcugaguccaaggacc.....  | 51  | 0 | S04 |
| .....ccagcgugcugaguccaaggaccG..... | 3   | 1 | S04 |
| .....ccagcgugcugaguccaaggaccC..... | 6   | 1 | S04 |
| .....ccagcgugcugaguccaaggaccA..... | 12  | 0 | S04 |
| .....ccagcgugcugaguccaaggaccU..... | 6   | 1 | S04 |
| .....cagcgugcugaguccaagga.....     | 12  | 0 | S04 |
| .....cagcgugcugaguccaaggacc.....   | 20  | 0 | S04 |
| .....cagcgugcugaguccaaggaccG.....  | 9   | 1 | S04 |
| .....cUgcgugcugaguccaaggacc.....   | 6   | 1 | S04 |
| .....cagcgugcugaguccaaggacc.....   | 3   | 1 | S04 |
| .....cagcgugcugagAccaaggacc.....   | 4   | 1 | S04 |
| .....cagcgugcugaguccaaggacc.....   | 546 | 0 | S04 |
| .....cagcgugcugaguccaaggaccA.....  | 36  | 0 | S04 |
| .....cagcgugcugaguccaaggaccU.....  | 18  | 1 | S04 |
| .....agcgugcugaguccaagg.....       | 4   | 0 | S04 |
| .....agcgugcugaguccaagga.....      | 4   | 0 | S04 |
| .....agcgugcugaguccaaggacc.....    | 16  | 0 | S04 |
| .....agcgugcugaguccaaggaccG.....   | 3   | 1 | S04 |
| .....agcgugcugaguccaaggacc.....    | 255 | 0 | S04 |
| .....agcgugcugaguccaaggaccA.....   | 105 | 0 | S04 |
| .....agcgugcugaguccaaggaccU.....   | 24  | 1 | S04 |
| .....gcgugcugaguccaaggacc.....     | 4   | 0 | S04 |
| .....gcgugcugaguccaaggacc.....     | 24  | 0 | S04 |
| .....gcgugcugaguccaaggaccA.....    | 3   | 0 | S04 |
| .....cgugcugaguccaaggacc.....      | 4   | 0 | S04 |
| .....cgugcugaguccaaggacc.....      | 54  | 0 | S04 |
| .....cgugcugaguccaaggaccG.....     | 3   | 1 | S04 |
| .....cgugcugaguccaaggaccA.....     | 15  | 0 | S04 |
| .....cgugcugaguccaaggaccU.....     | 6   | 1 | S04 |
| .....cgugcugaUuccaaggaccag.....    | 3   | 1 | S04 |
| .....cgugcugaguccaaggaccagc.....   | 3   | 0 | S04 |
| .....ugGugaguccaaggaccagcgug.....  | 3   | 1 | S04 |
| .....cugaguccaagUaccagcgug.....    | 3   | 1 | S04 |
| .....cugaguccaaggaccagcgug.....    | 6   | 0 | S04 |
| .....cuAaguccaaggaccagcgugc.....   | 3   | 1 | S04 |
| .....cugaguccaaggaccagcgugcu.....  | 3   | 0 | S04 |
| .....ugaguccaaggaccagcgug.....     | 3   | 0 | S04 |
| .....ugaguccaaggaccagcgugcu.....   | 12  | 0 | S04 |
| .....ugaguccaaggaccagcgugcC.....   | 3   | 1 | S04 |
| .....ugaguccaaggaccagcgugcU.....   | 3   | 1 | S04 |
| .....ugaguccaaggaccagcgugcuga..... | 9   | 0 | S04 |
| .....gaguccaaggaccagcgug.....      | 3   | 0 | S04 |
| .....gaguccaaggaccagcgugcG.....    | 3   | 1 | S04 |
| .....gaguccaaggaccagcgugcu.....    | 3   | 0 | S04 |
| .....aguccaaggaccagcgugcug.....    | 3   | 0 | S04 |
| .....aguccaaggaccagcgugcuga.....   | 12  | 0 | S04 |
| .....aguccaaggaccagcgugcugU.....   | 3   | 1 | S04 |
| .....guccaaggaccagcgugcugaUc.....  | 1   | 1 | S04 |
| .....uccaaggaccagcgugcugaUc.....   | 3   | 1 | S04 |
| .....caaggaccagcgugcugU.....       | 5   | 1 | S04 |
| .....caaggaccagUgugcugag.....      | 5   | 1 | S04 |
| .....caaggaccagcgugcugaUc.....     | 1   | 1 | S04 |
| .....aaggaccagcgugcugagA.....      | 5   | 1 | S04 |





**Mature**

**Star**

|                                                                                                             |    |   |     |
|-------------------------------------------------------------------------------------------------------------|----|---|-----|
| uuuggaagacucucggaagacuucucgaaaucuucaaaugcauuuuuugcuagaaggaagacguccacaaagucucagaaagucucggaaguuucucuccaaguggu |    |   |     |
| .....aagacucucggaagacuucu.....                                                                              | 1  | 0 | S04 |
| .....aagacucucggaagacuucug.....                                                                             | 10 | 0 | S04 |
| .....agacucucggaagacuucu.....                                                                               | 3  | 0 | S04 |
| .....agacucucggaagacuucug.....                                                                              | 15 | 0 | S04 |
| .....Ggacucucggaagacuucug.....                                                                              | 1  | 1 | S04 |
| .....agacucucggaagacuucugcg.....                                                                            | 1  | 0 | S04 |
| .....gacucucggaagacuucu.....                                                                                | 10 | 0 | S04 |
| .....gacucucggaagacuucu.....                                                                                | 3  | 0 | S04 |
| .....gacucucggaagacuucug.....                                                                               | 3  | 0 | S04 |
| .....cucucggaagacuucug.....                                                                                 | 7  | 0 | S04 |
| .....cuucucggaagacuucuaaagca.....                                                                           | 1  | 0 | S04 |
| .....ucucuaaagcauuuuugcuaga.....                                                                            | 3  | 0 | S04 |
| .....cuucuaaagcauuuuugcu.....                                                                               | 1  | 0 | S04 |
| .....aaugcauuuuugcuaga.....                                                                                 | 1  | 0 | S04 |





Star

Mature

|                                                                                                                    |    |   |     |
|--------------------------------------------------------------------------------------------------------------------|----|---|-----|
| ugcucggaauauuccgaggaacaauccgagcaacaugccccucgguauauuccgaucgaucgauggauauauggcacaaaacgcgaucgaucgaugaacuuccgaggaauauuc |    |   |     |
| .....gcaucgaucgaugaacuuccga.....                                                                                   | 1  | 0 | S03 |
| .....caucgaucgaugaacuuccA.....                                                                                     | 1  | 1 | S03 |
| .....caucgaucgaugaacuuccga.....                                                                                    | 4  | 0 | S03 |
| .....caucgaucgaugaacuuccgag.....                                                                                   | 5  | 0 | S03 |
| .....caucgaucgaugaacuuccgagg.....                                                                                  | 3  | 0 | S03 |
| .....aucgaucgaugaacuuccA.....                                                                                      | 1  | 1 | S03 |
| .....aucgaucgaugaacuuccCa.....                                                                                     | 1  | 1 | S03 |
| .....aucgaucgaugaacuuccgag.....                                                                                    | 3  | 0 | S03 |
| .....Uucgaucgaugaacuuccgag.....                                                                                    | 2  | 1 | S03 |
| .....aucgaucgaugaacuuccgagg.....                                                                                   | 8  | 0 | S03 |
| .....aucgaucgaugaacuuccgagU.....                                                                                   | 7  | 1 | S03 |
| .....aucgaucgaugaacuuccgagga.....                                                                                  | 10 | 0 | S03 |
| .....aucgaucgaugaacuuccgagga.....                                                                                  | 11 | 0 | S03 |
| .....aGcgaucgaugaacuuccgagga.....                                                                                  | 1  | 1 | S03 |
| .....aucgaucgaugaacuuccgagG.....                                                                                   | 1  | 1 | S03 |
| .....ucgaucgaugaacuuccA.....                                                                                       | 1  | 1 | S03 |
| .....ucgaucgaugaacuuccgag.....                                                                                     | 1  | 0 | S03 |
| .....ucgaucgaugaacuuccgagg.....                                                                                    | 3  | 0 | S03 |
| .....ucgaucgaugaacuuccgagga.....                                                                                   | 6  | 0 | S03 |
| .....ucgaucgaugaacuuccgagga.....                                                                                   | 1  | 0 | S03 |
| .....ucgaucgaugaacuuccgaggaC.....                                                                                  | 4  | 1 | S03 |
| .....ucgaucgaugaacuuccgagga.....                                                                                   | 1  | 0 | S03 |
| .....cgaucgaugaacuuccgag.....                                                                                      | 1  | 0 | S03 |
| .....cgaucgaugGacuuccgag.....                                                                                      | 1  | 1 | S03 |
| .....cgaucgaugaacuuccgagG.....                                                                                     | 1  | 1 | S03 |
| .....cgaucgaugaacuuccgagga.....                                                                                    | 2  | 0 | S03 |
| .....cgaucgaugaacuuccgaggaau.....                                                                                  | 3  | 0 | S03 |
| .....gaucgaugaacuuccgaggaau.....                                                                                   | 1  | 0 | S03 |
| .....aucgaugaacuuccgagga.....                                                                                      | 3  | 0 | S03 |
| .....cgaugaacuuccgagga.....                                                                                        | 1  | 0 | S03 |
| .....cgaugaacuuccgaggaC.....                                                                                       | 1  | 1 | S03 |
| .....gaugaacuuccgaggaau.....                                                                                       | 1  | 0 | S03 |
| .....cgguauauuccgaucgaucgauA.....                                                                                  | 1  | 1 | S04 |
| .....cgguauauuccgaucgaucgaugg.....                                                                                 | 1  | 0 | S04 |
| .....gguauauuccgaucgaucgaC.....                                                                                    | 1  | 1 | S04 |
| .....gguauauuccgaucgaucgaug.....                                                                                   | 1  | 0 | S04 |
| .....gguauauuccgaucgaucgaugg.....                                                                                  | 1  | 0 | S04 |
| .....guauauuccgaucgaucgaugg.....                                                                                   | 1  | 0 | S04 |
| .....guauauuccgaucgaucgaugA.....                                                                                   | 2  | 1 | S04 |
| .....auauuccgaucgaucgauggau.....                                                                                   | 1  | 0 | S04 |
| .....auauuccgaucgaucgauggauC.....                                                                                  | 1  | 1 | S04 |
| .....auuccgaucgaucgauggauau.....                                                                                   | 1  | 0 | S04 |
| .....uuccgaucgaucgauggauau.....                                                                                    | 1  | 0 | S04 |
| .....cGgaucgaucgauggauauaugg.....                                                                                  | 1  | 1 | S04 |
| .....gaucgaucgauggauau.....                                                                                        | 1  | 0 | S04 |
| .....gaucgaucgauggGauauaugg.....                                                                                   | 2  | 1 | S04 |
| .....gaucgaucgauggauUauuggcca.....                                                                                 | 1  | 1 | S04 |
| .....aucgaucgaugUauauaugg.....                                                                                     | 1  | 1 | S04 |
| .....aucgaucgauggauUauuggcca.....                                                                                  | 1  | 1 | S04 |
| .....aucgaucgauggauUauuggccaa.....                                                                                 | 2  | 1 | S04 |
| .....augAccaaaaacgcaucgaucgau.....                                                                                 | 1  | 1 | S04 |
| .....ggAccaaaaacgcaucgaucg.....                                                                                    | 1  | 1 | S04 |
| .....ggAccaaaaacgcaucgaucgaug.....                                                                                 | 1  | 1 | S04 |
| .....ccaaaaacgcaucgaucg.....                                                                                       | 1  | 0 | S04 |
| .....aaaacgcUucgaucgaugaac.....                                                                                    | 1  | 1 | S04 |
| .....aaaacgcaucgaucgaugaacuuc.....                                                                                 | 1  | 0 | S04 |
| .....aaacgcaucgaucgaugGac.....                                                                                     | 1  | 1 | S04 |
| .....aaacgcaucgaucgaugaacuucc.....                                                                                 | 1  | 0 | S04 |
| .....aaacgcaucgaucgaCgaacuucc.....                                                                                 | 1  | 1 | S04 |
| .....aGacgcaucgaucgaugaacuucc.....                                                                                 | 1  | 1 | S04 |
| .....acgcaucgaucgauUaacuucc.....                                                                                   | 1  | 1 | S04 |
| .....acgcaCgcaucgaugaacuucc.....                                                                                   | 1  | 1 | S04 |
| .....acgcaucgaucgaugaacuucc.....                                                                                   | 6  | 0 | S04 |
| .....acgcaucgaucgaugaacuuccA.....                                                                                  | 1  | 1 | S04 |
| .....acgcaucgaucgaugaacuuccg.....                                                                                  | 14 | 0 | S04 |
| .....acgcaucgaucgGugaacuuccg.....                                                                                  | 1  | 1 | S04 |
| .....acgcaucgaucgaugaacuuccA.....                                                                                  | 10 | 1 | S04 |
| .....acgcaucgaucgaCgaacuuccg.....                                                                                  | 1  | 1 | S04 |
| .....acgcaucgaucgaugaacuuccGU.....                                                                                 | 1  | 1 | S04 |

Star

Mature

ugcucggaauauuccgaggaacaauccgagcaacaugcccccgguauauuccgaucgaucgauggauauaugggcaaaaacgcaucgaucgaugaacuuccgaggaauauuc

|                                      |    |   |     |
|--------------------------------------|----|---|-----|
| .....acgcaucgaucgaugaacuuccAa.....   | 1  | 1 | S04 |
| .....acgcaucgaucgaugaacuuccga.....   | 40 | 0 | S04 |
| .....acgcaAacgaucgaugaacuuccga.....  | 1  | 1 | S04 |
| .....acUcaucgaucgaugaacuuccga.....   | 1  | 1 | S04 |
| .....acgcaucgaucgaugaacuuccCa.....   | 1  | 1 | S04 |
| .....cgcaucgaucgaugaacu.....         | 1  | 0 | S04 |
| .....cgcaucgaucgaugaacuuccg.....     | 5  | 0 | S04 |
| .....cgcaucgaucgaugaacuuccA.....     | 2  | 1 | S04 |
| .....cgcaucgaucgaugGacuuccga.....    | 1  | 1 | S04 |
| .....cgcaucgaucgaugaacuuccga.....    | 3  | 0 | S04 |
| .....cgcaucgaucgaugaacuuccgag.....   | 18 | 0 | S04 |
| .....gcaucgaucgaugaacuuccA.....      | 2  | 1 | S04 |
| .....gcaucgaucgaugaacuuccga.....     | 4  | 0 | S04 |
| .....gcaucgaucgaugaacuuccgU.....     | 1  | 1 | S04 |
| .....gcaucgaAacgaugaacuuccga.....    | 1  | 1 | S04 |
| .....gcaucgaucgaugaacuuccgag.....    | 3  | 0 | S04 |
| .....gcaucgaucgaugaacuuccgagg.....   | 6  | 0 | S04 |
| .....caucgaucgaugaacuuccg.....       | 1  | 0 | S04 |
| .....caucgaucgaugaacuuccgU.....      | 1  | 1 | S04 |
| .....caucgaucgaugaacuuccga.....      | 1  | 0 | S04 |
| .....caucgaucgaugaacuuccgC.....      | 1  | 1 | S04 |
| .....caucgaucgaugaacuuccgag.....     | 7  | 0 | S04 |
| .....caucgaucgaugaacuuccgagg.....    | 4  | 0 | S04 |
| .....caucgaucgaugaacuuccgagU.....    | 1  | 1 | S04 |
| .....caucgaucgaugaacuuccgaggU.....   | 1  | 1 | S04 |
| .....caucgaucgaugaacuuccgaggG.....   | 2  | 1 | S04 |
| .....caucgaucgaugaacuuccgagga.....   | 17 | 0 | S04 |
| .....caucgaucUaugacuuccgagga.....    | 1  | 1 | S04 |
| .....aucgaucgaugaacuuccA.....        | 1  | 1 | S04 |
| .....aucgaucgaugGacuuccg.....        | 1  | 1 | S04 |
| .....aucgaucgaugaacuuccgG.....       | 1  | 1 | S04 |
| .....aucgaucgaugaacuuccgU.....       | 2  | 1 | S04 |
| .....aucgaucgGugaacuuccga.....       | 1  | 1 | S04 |
| .....aucgaucgaugaacuuccgag.....      | 5  | 0 | S04 |
| .....aucgaucgaugaacuuccgagU.....     | 2  | 1 | S04 |
| .....aucgaucgaugaacuuccgagg.....     | 10 | 0 | S04 |
| .....aucgaucgGugaacuuccgagg.....     | 1  | 1 | S04 |
| .....aucgaucgaugaacuuccgagga.....    | 11 | 0 | S04 |
| .....aCgcaucgaugaacuuccgagga.....    | 1  | 1 | S04 |
| .....aGcgaucgaugaacuuccgagga.....    | 1  | 1 | S04 |
| .....aucgaucgaugaacuuccgaggGa.....   | 2  | 1 | S04 |
| .....aGcgaucgaugaacuuccgaggaa.....   | 1  | 1 | S04 |
| .....aucgaucgaugaacuuccgaggaa.....   | 39 | 0 | S04 |
| .....aucgaCcgauacuuccgaggaa.....     | 1  | 1 | S04 |
| .....Nucgaucgaugaacuuccgaggaa.....   | 1  | 1 | S04 |
| .....aucgaucgaugaacuuccgaggG.....    | 2  | 1 | S04 |
| .....aucgaucgaugaacuuccgaggaaCu..... | 3  | 1 | S04 |
| .....ucgaucgaugaacuuccgag.....       | 1  | 0 | S04 |
| .....ucgaucgaugaacuuccgagg.....      | 5  | 0 | S04 |
| .....ucgaucgaugaacuuccgagga.....     | 7  | 0 | S04 |
| .....ucgaucgaugaacuuccgaggC.....     | 1  | 1 | S04 |
| .....Ccgcaucgaugaacuuccgagga.....    | 1  | 1 | S04 |
| .....ucgaucgaugaacuuccgaggG.....     | 1  | 1 | S04 |
| .....ucgaucgaugaacuuccgaggaa.....    | 4  | 0 | S04 |
| .....ucgaucgaugaacuuccgaggGa.....    | 1  | 1 | S04 |
| .....ucgaucgaugaacuuccgaggaaC.....   | 8  | 1 | S04 |
| .....ucgaucgaugaacuuccgaggaaa.....   | 3  | 0 | S04 |
| .....ucgaucgaugaacuuccgaggaaG.....   | 4  | 1 | S04 |
| .....cgaucaugaacuuccgG.....          | 1  | 1 | S04 |
| .....cgaucaugaacuuccgC.....          | 1  | 1 | S04 |
| .....cgaucaugaacuuccgagg.....        | 1  | 0 | S04 |
| .....cgaucaugaacuuccgagU.....        | 1  | 1 | S04 |
| .....cgaucaugaacuuccgagC.....        | 1  | 1 | S04 |
| .....cgaucaugaacuuccgaggU.....       | 1  | 1 | S04 |
| .....cgaucaugaacuuccgaggG.....       | 2  | 1 | S04 |
| .....cgaucaugaacuuccgagga.....       | 10 | 0 | S04 |
| .....cgaucaugaacuuccgaggaa.....      | 1  | 1 | S04 |
| .....cgaucaugaacuuccgaggaaC.....     | 1  | 1 | S04 |
| .....cgaucaugaacuuccgaggaa.....      | 13 | 0 | S04 |
| .....cgaucaugaacuuccgaggaaC.....     | 2  | 1 | S04 |

Star

Mature

|                                                                                                                   |   |   |     |
|-------------------------------------------------------------------------------------------------------------------|---|---|-----|
| ugcucggaauauuccgaggaacauuccgagcaacaugccccucgguauauuccgaucgaucgauggauauauggcacaaaacgcaucgaucgaugaacuuccgaggaauauuc |   |   |     |
| .....cgaucgaugaacuuccgaggaau.....                                                                                 | 8 | 0 | S04 |
| .....cgaucgaugaacuuccgaggaac.....                                                                                 | 1 | 1 | S04 |
| .....cgaucgaugaacuuccgaggaacU.....                                                                                | 1 | 1 | S04 |
| .....cgaucgaugaacuuccgaggaau.....                                                                                 | 1 | 1 | S04 |
| .....cgaucgaugaacuuccgaggaauG.....                                                                                | 1 | 1 | S04 |
| .....gaucgaugaacuuccgaggaac.....                                                                                  | 1 | 1 | S04 |
| .....aucgaugaacuuccgaggaau.....                                                                                   | 1 | 0 | S04 |
| .....cgaugaacuuccgaggaau.....                                                                                     | 1 | 0 | S04 |













Star

Mature

ccuuacugacuagagaaaugggaaacugucccucgguauauaccgagggacauucccucggaauuccgaggaaccgguccucggaauauaccgagggacauguuccuc

.....ggaauauaccgagggacaugu..... 1 0 S04  
.....gaaauuaccgagggacaugu..... 1 0 S04



Star

Mature

|                           |                                                      |            |                    |    |   |     |
|---------------------------|------------------------------------------------------|------------|--------------------|----|---|-----|
| agaaaagcugcuaagcuauggaucc | uaagccuaaccuaaacauagaaaaaggauuugguuauauggcuugcauauuc | caggagcuuu | aacuugccuuuauggcuu |    |   |     |
| .....                     | .....                                                | .....      | .....              | 43 | 0 | S04 |
| .....                     | .....                                                | .....      | .....              | 1  | 1 | S04 |
| .....                     | .....                                                | .....      | .....              | 1  | 1 | S04 |
| .....                     | .....                                                | .....      | .....              | 1  | 1 | S04 |
| .....                     | .....                                                | .....      | .....              | 1  | 1 | S04 |
| .....                     | .....                                                | .....      | .....              | 1  | 1 | S04 |
| .....                     | .....                                                | .....      | .....              | 3  | 1 | S04 |
| .....                     | .....                                                | .....      | .....              | 1  | 1 | S04 |
| .....                     | .....                                                | .....      | .....              | 2  | 0 | S04 |













Provisional ID : chrC02\_1292332  
 Score total : 3.2  
 Score for star read(s) : 3.9  
 Score for read counts : -1.8  
 Score for mfe : 1.2  
 Score for randfold : 0  
 Score for cons. seed :  
 Total read count : 8  
 Mature read count : 7  
 Loop read count : 0  
 Star read count : 1

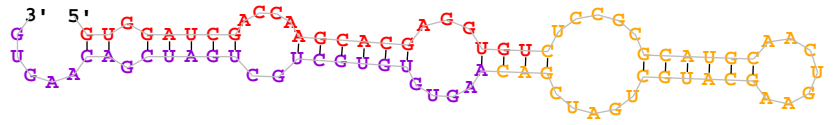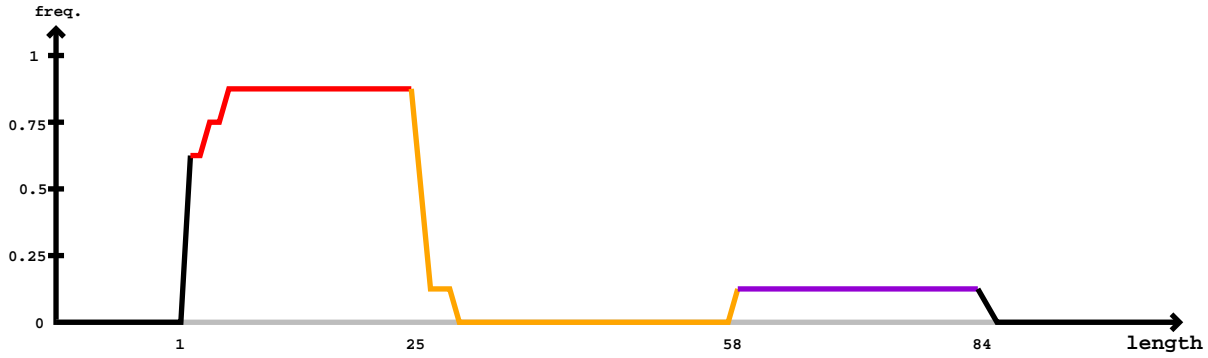

**Mature**

**Star**

|      |              |                                 |                                  |                                   |                      |       |       |    |        |
|------|--------------|---------------------------------|----------------------------------|-----------------------------------|----------------------|-------|-------|----|--------|
| 5' - | cagaagcacaag | <b>guggaucgaccaagcacgaggugu</b> | uccgcgcaugcaacugaagcaugcugaucgac | <b>aagugugugcugcugaucgacaagug</b> | aguuccagucaugaagccug | -3'   | obs   |    |        |
|      | cagaagcacaag | <b>guggaucgaccaagcacgaggugu</b> | uccgcgcaugcaacugaagcaugcugaucgac | <b>aagugugugcugcugaucgacaagug</b> | aguuccagucaugaagccug |       | exp   |    |        |
|      | ..(((        | (((                             | (((                              | (((                               | (((                  | ..    | reads | mm | sample |
|      | .....        | Uuggaucgaccaagcacgaggugu        | .....                            | .....                             | .....                | ..... | 1     | 1  | S04    |
|      | .....        | guggaucgaccaagcacgaggugu        | .....                            | .....                             | .....                | ..... | 3     | 0  | S04    |
|      | .....        | guggaucgaccaagcacgaggugC        | .....                            | .....                             | .....                | ..... | 1     | 1  | S04    |
|      | .....        | ggaucgaccaagcacgaggugu          | .....                            | .....                             | .....                | ..... | 1     | 0  | S04    |
|      | .....        | aucgaccaagcacgaggugucc          | .....                            | .....                             | .....                | ..... | 1     | 0  | S04    |
|      | .....        | .....                           | .....                            | aagugugugcugcugaucgacaaguA        | .....                | ..... | 1     | 1  | S04    |



Provisional ID : chrC02\_random\_2820048  
 Score total : 0.4  
 Score for star read(s) : -1.3  
 Score for read counts : 0  
 Score for mfe : 1.7  
 Score for randfold : 0  
 Score for cons. seed :  
 Total read count : 104  
 Mature read count : 104  
 Loop read count : 0  
 Star read count : 0

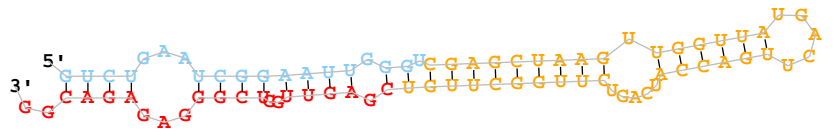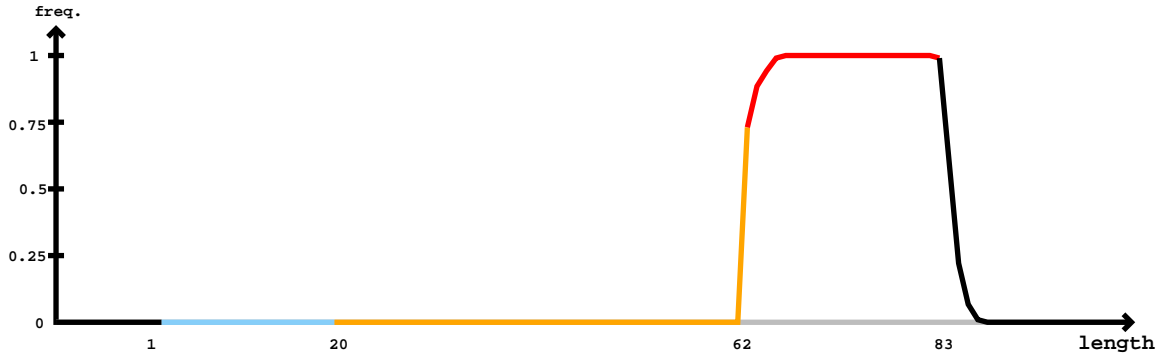

**Star**

**Mature**

| 5' -                                                                                                                                                          | 3' | exp | reads | mm | sample |
|---------------------------------------------------------------------------------------------------------------------------------------------------------------|----|-----|-------|----|--------|
| gaagccaug <u>gucugaaucggaa<u>uugggu</u>cgagcuaaguugguu<u>augacuugacc</u>caucaguc<u>uuggcuuguc</u>cgaguugguc<u>gggagagac</u>gggcuucag<u>uucc</u>gagcaguuuc</u> |    |     |       |    |        |
| .....cgaguuggucggga <u>lagac</u> gg.....                                                                                                                      |    |     | 11    | 1  | S03    |
| .....cgaguuggucggga <u>lagac</u> ggg.....                                                                                                                     |    |     | 12    | 1  | S03    |
| .....cgaguuggucggga <u>lagac</u> gggc.....                                                                                                                    |    |     | 1     | 1  | S03    |
| .....cgaguuggucggga <u>lagac</u> gggcu.....                                                                                                                   |    |     | 1     | 1  | S03    |
| .....gaguuggucggga <u>lagac</u> gg.....                                                                                                                       |    |     | 2     | 1  | S03    |
| .....gaguuggucggga <u>lagac</u> ggg.....                                                                                                                      |    |     | 2     | 1  | S03    |
| .....gaguuggucggga <u>lagac</u> gggc.....                                                                                                                     |    |     | 2     | 1  | S03    |
| .....guuggucggga <u>lagac</u> gg.....                                                                                                                         |    |     | 1     | 1  | S03    |
| .....guuggucggga <u>lagac</u> gggcu.....                                                                                                                      |    |     | 1     | 1  | S03    |
| .....cgaguuggucgggagagacg.....                                                                                                                                |    |     | 1     | 0  | S04    |
| .....cgaguuggucggga <u>lagac</u> gg.....                                                                                                                      |    |     | 31    | 1  | S04    |
| .....cgaguuggucggga <u>lagac</u> ggg.....                                                                                                                     |    |     | 17    | 1  | S04    |
| .....cgaguuggucggga <u>lagac</u> gggc.....                                                                                                                    |    |     | 1     | 1  | S04    |
| .....cgaguuggucggga <u>lagac</u> gggcu.....                                                                                                                   |    |     | 1     | 1  | S04    |
| .....gaguuggucggga <u>lagac</u> ggg.....                                                                                                                      |    |     | 2     | 1  | S04    |
| .....gaguuggucggga <u>lagac</u> gggc.....                                                                                                                     |    |     | 8     | 1  | S04    |
| .....aguuggucggga <u>lagac</u> ggg.....                                                                                                                       |    |     | 2     | 1  | S04    |
| .....aguuggucggga <u>lagac</u> gggc.....                                                                                                                      |    |     | 4     | 1  | S04    |
| .....guuggucggga <u>lagac</u> gggcu.....                                                                                                                      |    |     | 3     | 1  | S04    |
| .....uuggucggga <u>lagac</u> gggcu.....                                                                                                                       |    |     | 1     | 1  | S04    |



Provisional ID : chrC03\_1328701  
 Score total : 9.9  
 Score for star read(s) : 3.9  
 Score for read counts : 5.2  
 Score for mfe : 0.8  
 Score for randfold : 0  
 Score for cons. seed :  
 Total read count : 22  
 Mature read count : 13  
 Loop read count : 0  
 Star read count : 9

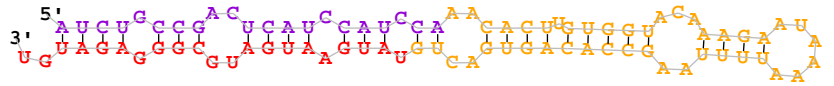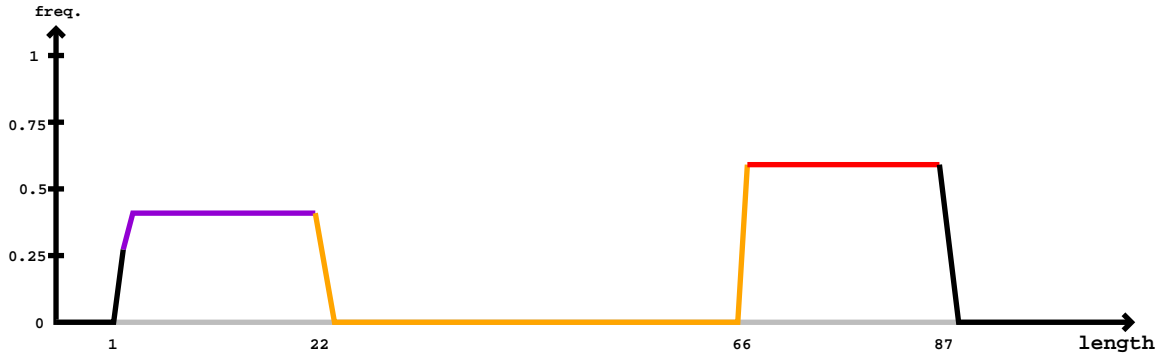

**Star**

**Mature**

| 5' -                        | obs | mm | sample |
|-----------------------------|-----|----|--------|
| gaaauaucugccgacucauccaucca  | 1   | 1  | S03    |
| gaaauaucugccgacucauccaucca  | 1   | 1  | S03    |
| gaaauaucugccgacucauccaucca  | 1   | 0  | S03    |
| gaaauaucugccgacucauccaucca  | 3   | 0  | S04    |
| gaaauaucugccgacucauccaucca  | 1   | 0  | S04    |
| gaaauaucugccgacucauccauccaU | 1   | 1  | S04    |
| gaaauaucugccgacucauccauccaC | 1   | 1  | S04    |
| gaaauaucugccgacucauccaucca  | 1   | 1  | S04    |
| gaaauaucugccgacucauccaucca  | 12  | 0  | S04    |

Provisional ID : chrC03\_1343668  
 Score total : 104  
 Score for star read(s) : 3.9  
 Score for read counts : 105.2  
 Score for mfe : -4.9  
 Score for randfold : 0  
 Score for cons. seed :  
 Total read count : 218  
 Mature read count : 217  
 Loop read count : 0  
 Star read count : 1

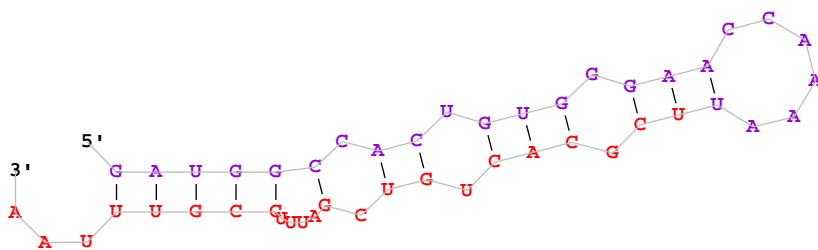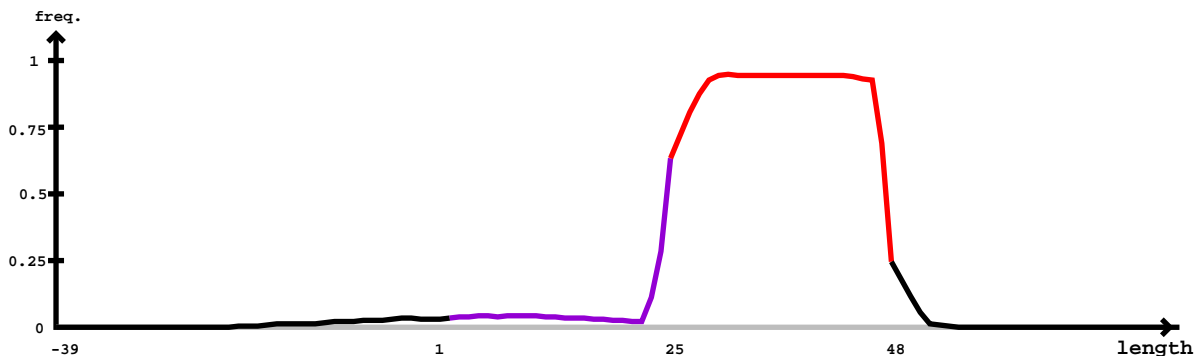

**Star** **Mature**

| 5' -                                                                                                            | Star                                                                     | Mature                                                                   | -3'                                                                            | obs   | exp | reads | mm  | sample |
|-----------------------------------------------------------------------------------------------------------------|--------------------------------------------------------------------------|--------------------------------------------------------------------------|--------------------------------------------------------------------------------|-------|-----|-------|-----|--------|
| aggugaaucuuucuccggagagagaauaugaaaaauucugauggccacugugggaacccaaaaucgcacugucgauuuccguuuuaaauaaagaacuaggaaccuaauuuu | gauggccacugugggaacccaaaaucgcacugucgauuuccguuuuaaauaaagaacuaggaaccuaauuuu | gauggccacugugggaacccaaaaucgcacugucgauuuccguuuuaaauaaagaacuaggaaccuaauuuu | .....(((((((.....)))))).....(((.....(((.....)))))).....(((((((.....))))))..... | reads | exp |       |     |        |
| .....gagaauaugaaaaauucugauggc.....                                                                              | .....gagaauaugaaaaauucugauggc.....                                       | .....gagaauaugaaaaauucugauggc.....                                       | 1                                                                              | 0     | 1   | 0     | S03 |        |
| .....aaaaauucugauggccacuguggg.....                                                                              | .....aaaaauucugauggccacuguggg.....                                       | .....aaaaauucugauggccacuguggg.....                                       | 1                                                                              | 0     | 1   | 0     | S03 |        |
| .....aaucugauggccacugugggaa.....                                                                                | .....aaucugauggccacugugggaa.....                                         | .....aaucugauggccacugugggaa.....                                         | 1                                                                              | 0     | 1   | 0     | S03 |        |
| .....gauggccacugugggaacccaaaa.....                                                                              | .....gauggccacugugggaacccaaaa.....                                       | .....gauggccacugugggaacccaaaa.....                                       | 1                                                                              | 0     | 1   | 0     | S03 |        |
| .....auggccacugugggaacccaaaau.....                                                                              | .....auggccacugugggaacccaaaau.....                                       | .....auggccacugugggaacccaaaau.....                                       | 1                                                                              | 0     | 1   | 0     | S03 |        |
| .....cacugugggaacccaaaaucgc.....                                                                                | .....cacugugggaacccaaaaucgc.....                                         | .....cacugugggaacccaaaaucgc.....                                         | 1                                                                              | 0     | 1   | 0     | S03 |        |
| .....aaucgcacugucgauuuccguuu.....                                                                               | .....aaucgcacugucgauuuccguuu.....                                        | .....aaucgcacugucgauuuccguuu.....                                        | 11                                                                             | 0     | 11  | 0     | S03 |        |
| .....aaucgcacugucgauuuccguuU.....                                                                               | .....aaucgcacugucgauuuccguuU.....                                        | .....aaucgcacugucgauuuccguuU.....                                        | 1                                                                              | 1     | 1   | 1     | S03 |        |
| .....aaucgcacugucgauuuccguuuu.....                                                                              | .....aaucgcacugucgauuuccguuuu.....                                       | .....aaucgcacugucgauuuccguuuu.....                                       | 1                                                                              | 0     | 1   | 0     | S03 |        |
| .....auucgcacugCcgauuuccguuu.....                                                                               | .....auucgcacugCcgauuuccguuu.....                                        | .....auucgcacugCcgauuuccguuu.....                                        | 1                                                                              | 1     | 1   | 1     | S03 |        |
| .....auucgcacugCcgauuuccguuu.....                                                                               | .....auucgcacugCcgauuuccguuu.....                                        | .....auucgcacugCcgauuuccguuu.....                                        | 1                                                                              | 1     | 1   | 1     | S03 |        |
| .....auucgcacugucgauuuccguuu.....                                                                               | .....auucgcacugucgauuuccguuu.....                                        | .....auucgcacugucgauuuccguuu.....                                        | 7                                                                              | 0     | 7   | 0     | S03 |        |
| .....auucgcacugucgauuuccguuuG.....                                                                              | .....auucgcacugucgauuuccguuuG.....                                       | .....auucgcacugucgauuuccguuuG.....                                       | 1                                                                              | 1     | 1   | 1     | S03 |        |
| .....auucgcacugucgauuuccguuuU.....                                                                              | .....auucgcacugucgauuuccguuuU.....                                       | .....auucgcacugucgauuuccguuuU.....                                       | 2                                                                              | 1     | 2   | 1     | S03 |        |
| .....auucgcacugucgauuuccguuuu.....                                                                              | .....auucgcacugucgauuuccguuuu.....                                       | .....auucgcacugucgauuuccguuuu.....                                       | 8                                                                              | 0     | 8   | 0     | S03 |        |
| .....auucgcacugucgauuuccguuuuu.....                                                                             | .....auucgcacugucgauuuccguuuuu.....                                      | .....auucgcacugucgauuuccguuuuu.....                                      | 1                                                                              | 0     | 1   | 0     | S03 |        |
| .....auucgcacugucgauuuccguuuUa.....                                                                             | .....auucgcacugucgauuuccguuuUa.....                                      | .....auucgcacugucgauuuccguuuUa.....                                      | 2                                                                              | 1     | 2   | 1     | S03 |        |
| .....uucgcacugucgauuuccguuuC.....                                                                               | .....uucgcacugucgauuuccguuuC.....                                        | .....uucgcacugucgauuuccguuuC.....                                        | 1                                                                              | 1     | 1   | 1     | S03 |        |
| .....uucgcacugucgauuuccguuu.....                                                                                | .....uucgcacugucgauuuccguuu.....                                         | .....uucgcacugucgauuuccguuu.....                                         | 10                                                                             | 0     | 10  | 0     | S03 |        |
| .....uucgcacugucgauuuccguuuC.....                                                                               | .....uucgcacugucgauuuccguuuC.....                                        | .....uucgcacugucgauuuccguuuC.....                                        | 1                                                                              | 1     | 1   | 1     | S03 |        |
| .....uucgcacugucgauuuccguuuu.....                                                                               | .....uucgcacugucgauuuccguuuu.....                                        | .....uucgcacugucgauuuccguuuu.....                                        | 36                                                                             | 0     | 36  | 0     | S03 |        |
| .....uucgcacugCcgauuuccguuuu.....                                                                               | .....uucgcacugCcgauuuccguuuu.....                                        | .....uucgcacugCcgauuuccguuuu.....                                        | 1                                                                              | 1     | 1   | 1     | S03 |        |
| .....uucgcacugucgauuuccguuuG.....                                                                               | .....uucgcacugucgauuuccguuuG.....                                        | .....uucgcacugucgauuuccguuuG.....                                        | 10                                                                             | 1     | 10  | 1     | S03 |        |
| .....uucgcacugucgauuuccguuuuu.....                                                                              | .....uucgcacugucgauuuccguuuuu.....                                       | .....uucgcacugucgauuuccguuuuu.....                                       | 1                                                                              | 0     | 1   | 0     | S03 |        |
| .....uucgcacugucgauuuccguuuUa.....                                                                              | .....uucgcacugucgauuuccguuuUa.....                                       | .....uucgcacugucgauuuccguuuUa.....                                       | 1                                                                              | 1     | 1   | 1     | S03 |        |
| .....ucgcacugucgauuuccC.....                                                                                    | .....ucgcacugucgauuuccC.....                                             | .....ucgcacugucgauuuccC.....                                             | 1                                                                              | 1     | 1   | 1     | S03 |        |
| .....ucgcacugucgauuuccguuuC.....                                                                                | .....ucgcacugucgauuuccguuuC.....                                         | .....ucgcacugucgauuuccguuuC.....                                         | 1                                                                              | 1     | 1   | 1     | S03 |        |
| .....ucgcacugucgauuuccguuu.....                                                                                 | .....ucgcacugucgauuuccguuu.....                                          | .....ucgcacugucgauuuccguuu.....                                          | 4                                                                              | 0     | 4   | 0     | S03 |        |
| .....ucgcacugucgauuuccguuuu.....                                                                                | .....ucgcacugucgauuuccguuuu.....                                         | .....ucgcacugucgauuuccguuuu.....                                         | 2                                                                              | 0     | 2   | 0     | S03 |        |
| .....ucgcacugucgauuuccguuuU.....                                                                                | .....ucgcacugucgauuuccguuuU.....                                         | .....ucgcacugucgauuuccguuuU.....                                         | 2                                                                              | 1     | 2   | 1     | S03 |        |
| .....ucgcacugucgauuuccguuuUa.....                                                                               | .....ucgcacugucgauuuccguuuUa.....                                        | .....ucgcacugucgauuuccguuuUa.....                                        | 3                                                                              | 1     | 3   | 1     | S03 |        |
| .....ucgcacugucgauuuccguuuuu.....                                                                               | .....ucgcacugucgauuuccguuuuu.....                                        | .....ucgcacugucgauuuccguuuuu.....                                        | 3                                                                              | 0     | 3   | 0     | S03 |        |
| .....ucgcacugucgauuuccguuuuuu.....                                                                              | .....ucgcacugucgauuuccguuuuuu.....                                       | .....ucgcacugucgauuuccguuuuuu.....                                       | 2                                                                              | 0     | 2   | 0     | S03 |        |

Star

Mature

|                                                                                                               |    |   |     |
|---------------------------------------------------------------------------------------------------------------|----|---|-----|
| aggugaaucuuucuccggagagagaauaugaaaaauucgagggccacuggggaaacaaaauucgcacugucgauuuccguuuuaaauaaagaacuaggaaccuaauuuu |    |   |     |
| .....cgacugucgauuuccgC.....                                                                                   | 2  | 1 | S03 |
| .....cgacugucgauuuccguuu.....                                                                                 | 6  | 0 | S03 |
| .....cgacugucgauuuccguuuua.....                                                                               | 3  | 0 | S03 |
| .....cgacugucgauuuccguuuuaaa.....                                                                             | 1  | 0 | S03 |
| .....cgacugucgauuuccguuuuaaaU.....                                                                            | 2  | 0 | S03 |
| .....cgacugucgauuuccguuuuaaUu.....                                                                            | 1  | 1 | S03 |
| .....gcacugucgauuuccguuu.....                                                                                 | 2  | 0 | S03 |
| .....gcacugucgauuuccguuuua.....                                                                               | 2  | 0 | S03 |
| .....gcacugucgauuuccguuuuaC.....                                                                              | 1  | 1 | S03 |
| .....gcacugucgauuuccguuuuaa.....                                                                              | 1  | 0 | S03 |
| .....gcacugucgauuuccguuuuaaa.....                                                                             | 1  | 0 | S03 |
| .....gcacugucgauuuccguuuuaaaU.....                                                                            | 4  | 0 | S03 |
| .....gcacugucgauuuccguuuuaaaUa.....                                                                           | 2  | 0 | S03 |
| .....cacugucgauuuccguuuuaaa.....                                                                              | 3  | 0 | S03 |
| .....cacugucgauuuccguuuuaaaU.....                                                                             | 3  | 0 | S03 |
| .....cacugucgauuuccguuuuaaaUa.....                                                                            | 4  | 0 | S03 |
| .....cacugucgauuuccguuuuaaaUaa.....                                                                           | 1  | 0 | S03 |
| .....acugucgauuuccguuuuaaaU.....                                                                              | 1  | 0 | S03 |
| .....acugucgauuuccguuuuaaaUa.....                                                                             | 1  | 0 | S03 |
| .....cugucgauuucUguuuuaaaUaaag.....                                                                           | 1  | 1 | S03 |
| .....gagagagaauaugaaaaGU.....                                                                                 | 1  | 1 | S04 |
| .....agagaauaugaaaauucgaggg.....                                                                              | 1  | 0 | S04 |
| .....uauugaaaaauucgagggccacu.....                                                                             | 1  | 0 | S04 |
| .....augaaaaauucgagggccacugu.....                                                                             | 1  | 0 | S04 |
| .....auucgagggccacuggggaaacc.....                                                                             | 1  | 0 | S04 |
| .....ggccacuggggaaacaaaauucg.....                                                                             | 1  | 0 | S04 |
| .....cacuggggaaacaaaauucgaU.....                                                                              | 1  | 1 | S04 |
| .....aaucgcacugucgauuuccguuu.....                                                                             | 6  | 0 | S04 |
| .....aaucgcacugucgauuuccguuuG.....                                                                            | 1  | 1 | S04 |
| .....aaucgcacugucgauuuccguuuua.....                                                                           | 1  | 0 | S04 |
| .....aaucgcacugucgauuuccguuuU.....                                                                            | 3  | 0 | S04 |
| .....aaucgcacugucgauuuccguuuC.....                                                                            | 1  | 1 | S04 |
| .....aaucgcacugucgauuuccguuuua.....                                                                           | 11 | 0 | S04 |
| .....aaucgcacugucgauuuccguuuU.....                                                                            | 2  | 1 | S04 |
| .....uucgcacugucgauuuccguuuC.....                                                                             | 1  | 1 | S04 |
| .....uucgcacugucgauuuccguuuC.....                                                                             | 1  | 1 | S04 |
| .....uucgcacugucgauuuccguuuua.....                                                                            | 11 | 0 | S04 |
| .....uucgcacugucgauuuccguuuG.....                                                                             | 5  | 1 | S04 |
| .....uucgcacugucgauuuccguuuua.....                                                                            | 2  | 0 | S04 |
| .....uucgcacugucgauuuccguuuU.....                                                                             | 2  | 1 | S04 |
| .....uucgcacugucgauuuccguuuUa.....                                                                            | 2  | 1 | S04 |
| .....cgacugucgauuuccguuu.....                                                                                 | 1  | 0 | S04 |
| .....cgacugucgauuuccguuuua.....                                                                               | 1  | 0 | S04 |
| .....cgacugucgauuuccguuuuaU.....                                                                              | 1  | 1 | S04 |
| .....cgacugucgauuuccguuuuaaa.....                                                                             | 1  | 0 | S04 |
| .....cgacugucgauuuccguuuuaaG.....                                                                             | 1  | 1 | S04 |
| .....gcacugucgauuuccguuuuaaaU.....                                                                            | 1  | 0 | S04 |
| .....gcacugucgauuuccguuuuaGau.....                                                                            | 1  | 1 | S04 |
| .....gcacugucgauuuccguuuuaaaUa.....                                                                           | 1  | 0 | S04 |
| .....cacugucgauuuccguuuua.....                                                                                | 1  | 0 | S04 |
| .....cacugucgauuuccguuuuaaaU.....                                                                             | 1  | 0 | S04 |
| .....acugucgauuuccguuuuaaaUa.....                                                                             | 2  | 0 | S04 |
| .....acugucgauuuccguuuuaaaUa.....                                                                             | 1  | 1 | S04 |

















Mature

Star

|                                                                                                            |    |   |     |
|------------------------------------------------------------------------------------------------------------|----|---|-----|
| uuccucggaauuucccggaauuuccgacgaacugagguuuccucggaauuccgucgguuuuuuccgaggaauuuccggaaccccauuuguguuaccucggaauuuc |    |   |     |
| .....ggaauuucccggaauuu.....                                                                                | 2  | 0 | S03 |
| .....aaauucccggaauuuccga.....                                                                              | 1  | 0 | S03 |
| .....aaauucccggaauuuccgacga.....                                                                           | 2  | 0 | S03 |
| .....aaauucccggaauuuccgacga.....                                                                           | 1  | 1 | S03 |
| .....aaauucccggaauuucc.....                                                                                | 1  | 0 | S03 |
| .....aaauucccggaauuuccgacg.....                                                                            | 1  | 0 | S03 |
| .....uuucccggaauuuccgacga.....                                                                             | 1  | 1 | S03 |
| .....auuccgacgaacugagguuuc.....                                                                            | 1  | 0 | S03 |
| .....auuccgacgaacugagguuuccuc.....                                                                         | 1  | 0 | S03 |
| .....guuucccggaauuccguc.....                                                                               | 1  | 0 | S03 |
| .....Cuucccggaauuccguc.....                                                                                | 1  | 1 | S03 |
| .....guauuucccgaggaauuuccCa.....                                                                           | 1  | 1 | S03 |
| .....guauuucccgaggaauuuccga.....                                                                           | 9  | 0 | S03 |
| .....guauuucccgaggaauuuccgaU.....                                                                          | 1  | 1 | S03 |
| .....guauuucccgaggaauuuccgag.....                                                                          | 1  | 0 | S03 |
| .....guauuucccgaggaauuuccgagU.....                                                                         | 2  | 1 | S03 |
| .....uuauuucccgaggaauuuccga.....                                                                           | 16 | 0 | S03 |
| .....uuauuucccgaggaauuuccgag.....                                                                          | 1  | 0 | S03 |
| .....uuauuucccgaggaauuuccgagU.....                                                                         | 1  | 1 | S03 |
| .....auauuucccgaggaauuuccg.....                                                                            | 2  | 0 | S03 |
| .....auauuucccgaggaauuuccga.....                                                                           | 2  | 0 | S03 |
| .....auauuucccgaggaauuuccgag.....                                                                          | 1  | 0 | S03 |
| .....auauuucccgaggaauuuccgagU.....                                                                         | 11 | 1 | S03 |
| .....auauuucccgaggaauuuccgagg.....                                                                         | 1  | 0 | S03 |
| .....uuuucccgaggaauuuccg.....                                                                              | 1  | 0 | S03 |
| .....uuuucccgaggaauuuccgagU.....                                                                           | 1  | 1 | S03 |
| .....uuuucccgaggaauuuccgagg.....                                                                           | 2  | 0 | S03 |
| .....auuccgaggaauuuccga.....                                                                               | 2  | 0 | S03 |
| .....auuccgaggaauuuccgagU.....                                                                             | 1  | 1 | S03 |
| .....auuccgaggaauuuccgagg.....                                                                             | 2  | 0 | S03 |
| .....Guuccgaggaauuuccgagg.....                                                                             | 1  | 1 | S03 |
| .....uuccgaggaauuuccgag.....                                                                               | 1  | 0 | S03 |
| .....cgaUgaaauuccgaggaac.....                                                                              | 1  | 1 | S03 |
| .....cgaggaauuuccgaggaac.....                                                                              | 1  | 0 | S03 |
| .....cgaggGaaauuccgaggaacc.....                                                                            | 1  | 1 | S03 |
| .....gaggaauuuccgaggaac.....                                                                               | 10 | 0 | S03 |
| .....gaggaauuuccgaggaacc.....                                                                              | 2  | 0 | S03 |
| .....gaggaauuuccgaggaaccU.....                                                                             | 1  | 1 | S03 |
| .....gaggaauuuccgaggaaccAc.....                                                                            | 1  | 1 | S03 |
| .....aggaauuuccgaggaacccauu.....                                                                           | 1  | 1 | S03 |
| .....uuccgaggaaccAcauuuuugug.....                                                                          | 1  | 1 | S03 |
| uuccucggaauuucccg.....                                                                                     | 4  | 0 | S04 |
| uuccucggaauuucccgga.....                                                                                   | 1  | 0 | S04 |
| uuccucggaauuucccggaaua.....                                                                                | 1  | 0 | S04 |
| uuccucggaauuucccggaauuu.....                                                                               | 1  | 0 | S04 |
| ..uGcucggaauuucccggaauuu.....                                                                              | 1  | 1 | S04 |
| ..uccucggaauuucccggaauuu.....                                                                              | 2  | 1 | S04 |
| ..ucAucggaauuucccggaauuu.....                                                                              | 2  | 1 | S04 |
| ..uAcucggaauuucccggaauuu.....                                                                              | 1  | 1 | S04 |
| ..ccucggaauuucccgga.....                                                                                   | 13 | 0 | S04 |
| ..ccGcgaauuucccgga.....                                                                                    | 1  | 1 | S04 |
| ..ccucggaauuucccgga.....                                                                                   | 6  | 0 | S04 |
| ..ccucggaauuucccggaau.....                                                                                 | 3  | 0 | S04 |
| ..ccucggaauuucccggaac.....                                                                                 | 1  | 1 | S04 |
| ..ccucggaauuucccggaaua.....                                                                                | 4  | 0 | S04 |
| ..ccucggaauuucccggaauG.....                                                                                | 1  | 1 | S04 |
| ..ccucggaauuucccggaauu.....                                                                                | 8  | 0 | S04 |
| ..ccucggaauuucccggaauuu.....                                                                               | 5  | 0 | S04 |
| ..ccucggaauuucccggaauuC.....                                                                               | 1  | 1 | S04 |
| ..ccucggaauuucccggaauuCc.....                                                                              | 1  | 1 | S04 |
| ..ccucggaauuucccggaauuuc.....                                                                              | 14 | 0 | S04 |
| ..cucggaauuucccgga.....                                                                                    | 8  | 0 | S04 |
| ..cucggaauuucccggaau.....                                                                                  | 9  | 0 | S04 |
| ..cucggaauuucccggaaua.....                                                                                 | 22 | 0 | S04 |
| ..cucggaauuucccggaauG.....                                                                                 | 1  | 1 | S04 |
| ..cucggaauuucccggaauu.....                                                                                 | 16 | 0 | S04 |
| ..Nucggaauuucccggaauuu.....                                                                                | 1  | 1 | S04 |
| ..cucggaauuucccggaauuC.....                                                                                | 4  | 1 | S04 |
| ..cucggaauuucccggaauuu.....                                                                                | 40 | 0 | S04 |









Mature

Star

|                                                                                                             |    |   |     |
|-------------------------------------------------------------------------------------------------------------|----|---|-----|
| uuccucggaauuucccggaauuucccgacgaacugagguuuccucggaauuccgucgguauuuuccgaggaauuuccggaaccccauuuguguuaccucggaauuuc |    |   |     |
| .....ggaauuucccggaauu.....                                                                                  | 2  | 0 | S03 |
| .....aaauucccggaauuuccga.....                                                                               | 1  | 0 | S03 |
| .....aaauucccggaauuuccgacga.....                                                                            | 2  | 0 | S03 |
| .....aaauucccggaauuuccgacga.....                                                                            | 1  | 1 | S03 |
| .....aaauucccggaauuucc.....                                                                                 | 1  | 0 | S03 |
| .....aaauucccggaauuuccgacg.....                                                                             | 1  | 0 | S03 |
| .....uuucccggaauuuccgacga.....                                                                              | 1  | 1 | S03 |
| .....auuccgacgaacugagguuuc.....                                                                             | 1  | 0 | S03 |
| .....auuccgacgaacugagguuuccuc.....                                                                          | 1  | 0 | S03 |
| .....guuucccggaauuccguc.....                                                                                | 1  | 0 | S03 |
| .....Cuucccggaauuccguc.....                                                                                 | 1  | 1 | S03 |
| .....guauuucccgaggaauuuccCa.....                                                                            | 1  | 1 | S03 |
| .....guauuucccgaggaauuuccga.....                                                                            | 9  | 0 | S03 |
| .....guauuucccgaggaauuuccgaU.....                                                                           | 1  | 1 | S03 |
| .....guauuucccgaggaauuuccgag.....                                                                           | 1  | 0 | S03 |
| .....guauuucccgaggaauuuccgagU.....                                                                          | 2  | 1 | S03 |
| .....uuauuucccgaggaauuuccga.....                                                                            | 16 | 0 | S03 |
| .....uuauuucccgaggaauuuccgag.....                                                                           | 1  | 0 | S03 |
| .....uuauuucccgaggaauuuccgagU.....                                                                          | 1  | 1 | S03 |
| .....auuucccgaggaauuuccg.....                                                                               | 2  | 0 | S03 |
| .....auuucccgaggaauuuccga.....                                                                              | 2  | 0 | S03 |
| .....auuucccgaggaauuuccgag.....                                                                             | 1  | 0 | S03 |
| .....auuucccgaggaauuuccgagU.....                                                                            | 11 | 1 | S03 |
| .....auuucccgaggaauuuccgagg.....                                                                            | 1  | 0 | S03 |
| .....uuucccgaggaauuuccg.....                                                                                | 1  | 0 | S03 |
| .....uuucccgaggaauuuccgagU.....                                                                             | 1  | 1 | S03 |
| .....uuucccgaggaauuuccgagg.....                                                                             | 2  | 0 | S03 |
| .....auuccgaggaauuuccga.....                                                                                | 2  | 0 | S03 |
| .....auuccgaggaauuuccgagU.....                                                                              | 1  | 1 | S03 |
| .....auuccgaggaauuuccgagg.....                                                                              | 2  | 0 | S03 |
| .....Guuccgaggaauuuccgagg.....                                                                              | 1  | 1 | S03 |
| .....uuccgaggaauuuccgag.....                                                                                | 1  | 0 | S03 |
| .....cgaUgaaauuccgaggaac.....                                                                               | 1  | 1 | S03 |
| .....cgaggaauuuccgaggaac.....                                                                               | 1  | 0 | S03 |
| .....cgaggGaaauuccgaggaacc.....                                                                             | 1  | 1 | S03 |
| .....gaggaauuuccgaggaac.....                                                                                | 10 | 0 | S03 |
| .....gaggaauuuccgaggaacc.....                                                                               | 2  | 0 | S03 |
| .....gaggaauuuccgaggaaccU.....                                                                              | 1  | 1 | S03 |
| .....gaggaauuuccgaggaaccAc.....                                                                             | 1  | 1 | S03 |
| .....aggaauuuccgaggaacccauu.....                                                                            | 1  | 1 | S03 |
| .....uuccgaggaaccAcauuuuugug.....                                                                           | 1  | 1 | S03 |
| uuccucggaauuucccg.....                                                                                      | 4  | 0 | S04 |
| uuccucggaauuucccgga.....                                                                                    | 1  | 0 | S04 |
| uuccucggaauuucccggaaua.....                                                                                 | 1  | 0 | S04 |
| uuccucggaauuucccggaauuu.....                                                                                | 1  | 0 | S04 |
| ..uGcucggaauuucccggaauuu.....                                                                               | 1  | 1 | S04 |
| ..uccucggaauuucccggaauuu.....                                                                               | 2  | 1 | S04 |
| ..ucAucggaauuucccggaauuu.....                                                                               | 2  | 1 | S04 |
| ..uAcucggaauuucccggaauuu.....                                                                               | 1  | 1 | S04 |
| ..ccucggaauuucccgga.....                                                                                    | 13 | 0 | S04 |
| ..ccGcgaauuucccgga.....                                                                                     | 1  | 1 | S04 |
| ..ccucggaauuucccgga.....                                                                                    | 6  | 0 | S04 |
| ..ccucggaauuucccggaau.....                                                                                  | 3  | 0 | S04 |
| ..ccucggaauuucccggaac.....                                                                                  | 1  | 1 | S04 |
| ..ccucggaauuucccggaaua.....                                                                                 | 4  | 0 | S04 |
| ..ccucggaauuucccggaauG.....                                                                                 | 1  | 1 | S04 |
| ..ccucggaauuucccggaauu.....                                                                                 | 8  | 0 | S04 |
| ..ccucggaauuucccggaauuu.....                                                                                | 5  | 0 | S04 |
| ..ccucggaauuucccggaauuC.....                                                                                | 1  | 1 | S04 |
| ..ccucggaauuucccggaauuCc.....                                                                               | 1  | 1 | S04 |
| ..ccucggaauuucccggaauuuc.....                                                                               | 14 | 0 | S04 |
| ..cucggaauuucccgga.....                                                                                     | 8  | 0 | S04 |
| ..cucggaauuucccggaau.....                                                                                   | 9  | 0 | S04 |
| ..cucggaauuucccggaaua.....                                                                                  | 22 | 0 | S04 |
| ..cucggaauuucccggaauG.....                                                                                  | 1  | 1 | S04 |
| ..cucggaauuucccggaauu.....                                                                                  | 16 | 0 | S04 |
| ..Nucggaauuucccggaauuu.....                                                                                 | 1  | 1 | S04 |
| ..cucggaauuucccggaauuC.....                                                                                 | 4  | 1 | S04 |
| ..cucggaauuucccggaauuu.....                                                                                 | 40 | 0 | S04 |





Star

Mature

| Sequence                                                                                                          | Star | Mature | Category |
|-------------------------------------------------------------------------------------------------------------------|------|--------|----------|
| aauuucccggaauauuccgacggauugauguuccucggaaauuccgucgguaauauucccgaggaaauuccucgggaaauucugaggauucauuuccgucggaaugucgguca | 1    | 0      | S03      |
| . . . . . gaauauuccgacggauugau                                                                                    | 1    | 1      | S03      |
| . . . . . gaauauuccgacggauugauU                                                                                   | 7    | 0      | S03      |
| . . . . . gaauauuccgacggauugaug                                                                                   | 2    | 0      | S03      |
| . . . . . gaauauuccgacggauugaugg                                                                                  | 3    | 1      | S03      |
| . . . . . gaauauuccgacggauugaugC                                                                                  | 4    | 0      | S03      |
| . . . . . aauauuccgacggauugau                                                                                     | 1    | 1      | S03      |
| . . . . . aauauuccgacggauugauC                                                                                    | 7    | 0      | S03      |
| . . . . . aauauuccgacggauugaug                                                                                    | 2    | 0      | S03      |
| . . . . . aauauuccgacggauugaugg                                                                                   | 1    | 1      | S03      |
| . . . . . aauauuccgacggauugauggA                                                                                  | 1    | 0      | S03      |
| . . . . . aauauuccgacggauugaugguuc                                                                                | 1    | 0      | S03      |
| . . . . . auauuccgacggauugau                                                                                      | 1    | 0      | S03      |
| . . . . . auauuccgacggauugauU                                                                                     | 2    | 1      | S03      |
| . . . . . auauuccgacggauugauC                                                                                     | 1    | 1      | S03      |
| . . . . . auauuccgacggauugaug                                                                                     | 7    | 0      | S03      |
| . . . . . auauuccgacggauugaugguuc                                                                                 | 2    | 0      | S03      |
| . . . . . uauuccgacggauugaugguuccu                                                                                | 1    | 1      | S03      |
| . . . . . auuccgacggauugaugg                                                                                      | 1    | 0      | S03      |
| . . . . . auuccgacggauugauggu                                                                                     | 1    | 0      | S03      |
| . . . . . gacggauugaugguuccucgg                                                                                   | 1    | 0      | S03      |
| . . . . . acggauugaugguuccucggaaau                                                                                | 1    | 0      | S03      |
| . . . . . uuccucggaaauuccgucgguaUG                                                                                | 1    | 1      | S03      |
| . . . . . uuccucggaaauuccgucgguaUau                                                                               | 1    | 1      | S03      |
| . . . . . uuccucggaaauuccgucgguaUauu                                                                              | 1    | 0      | S03      |
| . . . . . ccucggaaauuccgucggua                                                                                    | 1    | 0      | S03      |
| . . . . . ccucggaaauuccgucgguaauuu                                                                                | 2    | 0      | S03      |
| . . . . . ccucggaaauuccgucgguaauuuc                                                                               | 12   | 0      | S03      |
| . . . . . cucggaaauuccgucggua                                                                                     | 7    | 0      | S03      |
| . . . . . cucggaaauuccgucgguaU                                                                                    | 1    | 0      | S03      |
| . . . . . cucggaaauuccgucgguaUau                                                                                  | 1    | 0      | S03      |
| . . . . . cucggaaauuccgucgguaUG                                                                                   | 1    | 1      | S03      |
| . . . . . cucggaaauuccgucgguaUauu                                                                                 | 2    | 0      | S03      |
| . . . . . cucggUauuccgucgguaUauuu                                                                                 | 2    | 1      | S03      |
| . . . . . cucggaaauuccgucgguaUGuu                                                                                 | 1    | 1      | S03      |
| . . . . . cucggaaauuccgucgguaUauuu                                                                                | 50   | 0      | S03      |
| . . . . . cucggaaauuccgucgguaUauuuc                                                                               | 20   | 0      | S03      |
| . . . . . cucggaaauuccgucgguaUauuucc                                                                              | 14   | 0      | S03      |
| . . . . . ucggaaauuccgucgguaU                                                                                     | 1    | 0      | S03      |
| . . . . . ucggaaauuccgucgguaUau                                                                                   | 7    | 0      | S03      |
| . . . . . ucggaaauuccgucgguaUG                                                                                    | 1    | 1      | S03      |
| . . . . . ucggaaauuccgucgguaUauu                                                                                  | 2    | 0      | S03      |
| . . . . . ucggaaauuccgucgguaUauuu                                                                                 | 20   | 0      | S03      |
| . . . . . ucggaaauuccgucgguaUauuuc                                                                                | 53   | 0      | S03      |
| . . . . . ucggaaauuccgucgguaUauuucc                                                                               | 1    | 0      | S03      |
| . . . . . cggaaauuccgucgguaUau                                                                                    | 1    | 0      | S03      |
| . . . . . cggaaauuccgucgguaUauu                                                                                   | 4    | 0      | S03      |
| . . . . . cggaaauuccgucgguaUauuu                                                                                  | 9    | 0      | S03      |
| . . . . . cggaaauuccgucgguaUauuuc                                                                                 | 1    | 1      | S03      |
| . . . . . cggaaauuccgucgguaUauuucc                                                                                | 15   | 0      | S03      |
| . . . . . cggaaauuccgucgguaUauuucc                                                                                | 2    | 0      | S03      |
| . . . . . ggaauuccgucgguaUauuu                                                                                    | 16   | 0      | S03      |
| . . . . . ggaauuccgucgguaUauuuc                                                                                   | 4    | 0      | S03      |
| . . . . . ggaauuccgucgguaUauuuccga                                                                                | 3    | 0      | S03      |
| . . . . . ggaauuccgucgguaUauuuccgag                                                                               | 4    | 0      | S03      |
| . . . . . gaaauuccgucgguaUauuu                                                                                    | 6    | 0      | S03      |
| . . . . . gaaauuccgucgguaUauuuc                                                                                   | 2    | 0      | S03      |
| . . . . . gaaauuccgucgguaUauuucc                                                                                  | 10   | 0      | S03      |
| . . . . . gaaauuccgucgguaUauuuccg                                                                                 | 61   | 0      | S03      |
| . . . . . gaaauuccgucgguaUauuuccga                                                                                | 13   | 0      | S03      |
| . . . . . gaaauuccgucgguaUauuuccgag                                                                               | 6    | 0      | S03      |
| . . . . . aauuccgucgguaUauuuc                                                                                     | 10   | 0      | S03      |
| . . . . . aauuccgucgguaUauuucc                                                                                    | 20   | 0      | S03      |
| . . . . . aauuccgucgguaUauuuccC                                                                                   | 2    | 1      | S03      |
| . . . . . aauuccgucgguaUauuuccg                                                                                   | 30   | 0      | S03      |
| . . . . . aauuccgucgguaUauuuccga                                                                                  | 3    | 0      | S03      |
| . . . . . aauuccgucgguaUauuuccgag                                                                                 | 9    | 0      | S03      |
| . . . . . aauuccgucgguaUauuuccgagg                                                                                | 1    | 0      | S03      |
| . . . . . aauuccgucgguaUauuuccgaggG                                                                               | 2    | 1      | S03      |
| . . . . . aauuccgucgguaUauuuccgagga                                                                               | 5    | 0      | S03      |
| . . . . . auuccgucgguaUauuucc                                                                                     | 8    | 0      | S03      |

Star

Mature

| Sequence                                                                                               | Star | Mature | S03 |
|--------------------------------------------------------------------------------------------------------|------|--------|-----|
| aauuucccggaauauuccgacggaugauguuccucggaaucgucgguaauuuccgaggaauuccucgggaauucugaggauuauuccgucggaugucgucga |      |        |     |
| .auuccgucgguaauuuccg                                                                                   | 9    | 0      | S03 |
| .auuccgucgguaauuuccga                                                                                  | 1    | 0      | S03 |
| .auuccgucgguaauuuccgag                                                                                 | 1    | 0      | S03 |
| .auuccgucgguaauuuccgagg                                                                                | 5    | 0      | S03 |
| .uuccgucgguaauuuccg                                                                                    | 1    | 0      | S03 |
| .uuccgucgguaauuuccgag                                                                                  | 1    | 0      | S03 |
| .uccgucgguaauuuccga                                                                                    | 1    | 0      | S03 |
| .uauuccgaggGaaauccu                                                                                    | 1    | 1      | S03 |
| .cucgggaaauucugaggauuuc                                                                                | 1    | 0      | S03 |
| .ucgggaaauucugaggG                                                                                     | 1    | 1      | S03 |
| .ucgggaaauucugaggauuuc                                                                                 | 2    | 0      | S03 |
| .ucgAgaauucugaggauuuc                                                                                  | 1    | 1      | S03 |
| .auucugaggauuucuuuccguc                                                                                | 1    | 0      | S03 |
| .ugaggauuucuuuccgucgga                                                                                 | 1    | 0      | S03 |
| .gaggauuucuuuccgucgga                                                                                  | 1    | 0      | S03 |
| .gaggauuucuuCuccgucgga                                                                                 | 1    | 1      | S03 |
| .gaggauuucuuuccgucgga                                                                                  | 3    | 0      | S03 |
| .gaggauuucuuuccgucgG                                                                                   | 1    | 1      | S03 |
| .Naggauuucuuuccgucgga                                                                                  | 1    | 1      | S03 |
| .gaggauuucuuCuccgucgga                                                                                 | 1    | 1      | S03 |
| .gaggauuucuuuccgucgga                                                                                  | 77   | 0      | S03 |
| .gaggauuucuuuccgucggaG                                                                                 | 1    | 1      | S03 |
| .gaggauuucuuuccgucggaA                                                                                 | 2    | 1      | S03 |
| .gaggauuucuuuccgucggaC                                                                                 | 1    | 1      | S03 |
| .gaggauuucuuuccgucggaug                                                                                | 5    | 0      | S03 |
| .gaggauuucuuuccgucggaagu                                                                               | 2    | 0      | S03 |
| .gaggauuucuuuccgucggaugA                                                                               | 1    | 1      | S03 |
| .gaggauuucuuuccgucggauguc                                                                              | 1    | 0      | S03 |
| .aggauuucuuuccgucgga                                                                                   | 7    | 0      | S03 |
| .aggauuucuuuccgucgga                                                                                   | 5    | 0      | S03 |
| .aggauuucuuuccgucggaG                                                                                  | 1    | 1      | S03 |
| .aggauuucuuuccgucgga                                                                                   | 5    | 0      | S03 |
| .aggauuucuuuccgucggaug                                                                                 | 371  | 0      | S03 |
| .aggauuucuuuccgucggaC                                                                                  | 1    | 1      | S03 |
| .aggauCuuuccgucggaug                                                                                   | 3    | 1      | S03 |
| .aggauuucuuuccgucggaug                                                                                 | 1    | 1      | S03 |
| .aggauuucuuuccgucggaug                                                                                 | 1    | 1      | S03 |
| .aggauuucuuuccgucggaug                                                                                 | 2    | 1      | S03 |
| .aggauuucuuuccgucggaug                                                                                 | 1    | 1      | S03 |
| .aggauuucuuuccgucggaug                                                                                 | 1    | 1      | S03 |
| .aggauuucuuuccgucggaug                                                                                 | 1    | 0      | S03 |
| .aggauuucuuuccgucggauguc                                                                               | 1    | 0      | S03 |
| .Nggauuucuuuccgucggaugucc                                                                              | 1    | 1      | S03 |
| .ggauuucuuuccgucgg                                                                                     | 2    | 0      | S03 |
| .ggauuucuuuccgucgga                                                                                    | 1    | 0      | S03 |
| .ggauuucuuuccgucgga                                                                                    | 3    | 0      | S03 |
| .ggauuucuuuccgucgga                                                                                    | 20   | 0      | S03 |
| .ggauuucuuCuccgucgga                                                                                   | 1    | 1      | S03 |
| .ggauuucuuuccgucggaug                                                                                  | 1    | 1      | S03 |
| .ggauuucuuuccgucggaug                                                                                  | 107  | 0      | S03 |
| .ggauuucuuuccgucggaug                                                                                  | 1    | 1      | S03 |
| .ggauuucuuuccgucgG                                                                                     | 2    | 1      | S03 |
| .ggauuucuuuccgucggaugG                                                                                 | 9    | 1      | S03 |
| .ggauuucuuuccgucggaug                                                                                  | 1    | 1      | S03 |
| .Ngauuucuuuccgucggaug                                                                                  | 2    | 1      | S03 |
| .ggauuucuuuccgucggaugC                                                                                 | 16   | 1      | S03 |
| .ggauuucuuCuccgucggaug                                                                                 | 1    | 1      | S03 |
| .ggauuucuuuccgucggaug                                                                                  | 168  | 0      | S03 |
| .ggauuucuuuccgucggaugA                                                                                 | 8    | 1      | S03 |
| .ggauCuuuccgucggaug                                                                                    | 1    | 1      | S03 |
| .ggauuucuuuccgucggauguc                                                                                | 3    | 0      | S03 |
| .gauuucuuuccgucgga                                                                                     | 1    | 0      | S03 |
| .gauuucuuuccgucggaA                                                                                    | 1    | 1      | S03 |
| .gauuucuuuccgucgga                                                                                     | 19   | 0      | S03 |
| .gauuucuuuccgucggaug                                                                                   | 1    | 1      | S03 |
| .Nauuucuuuccgucggaug                                                                                   | 1    | 1      | S03 |
| .gauuucuuuccgucggaug                                                                                   | 243  | 0      | S03 |
| .gauuucuuCuccgucggaug                                                                                  | 2    | 1      | S03 |
| .gauuucuuuccCucggaug                                                                                   | 1    | 1      | S03 |
| .gauuucuuucccucgucggaug                                                                                | 1    | 1      | S03 |



Star

Mature

| Sequence                            | Star | Mature | Category |
|-------------------------------------|------|--------|----------|
| .....gauuucuuuuuccgucggaagC.....    | 1    | 1      | S03      |
| .....gauuucuuuuuccgucggaaugu.....   | 8    | 0      | S03      |
| .....gauuucuuuuuccgucggaagA.....    | 3    | 1      | S03      |
| .....gauuucuuuuuccgucggaaguc.....   | 1    | 1      | S03      |
| .....gauCuuuuuuuccgucggaaguc.....   | 1    | 1      | S03      |
| .....gauuucuuuuuccgucggaagGc.....   | 1    | 1      | S03      |
| .....gaGuuucuuuuuccgucggaaguc.....  | 1    | 1      | S03      |
| .....gauGuuucuuuuuccgucggaaguc..... | 1    | 1      | S03      |
| .....gCuucuuuuuuuccgucggaaguc.....  | 1    | 1      | S03      |
| .....gauuucuuuuuccgucggaaguc.....   | 3    | 1      | S03      |
| .....Nuuucuuuuuuuccgucggaaguc.....  | 2    | 1      | S03      |
| .....gauuAcuuuuuuuccgucggaaguc..... | 1    | 1      | S03      |
| .....gauuucuuuuuccgucggaagucG.....  | 7    | 1      | S03      |
| .....gauuucuuuuuccgucggaaguc.....   | 1    | 1      | S03      |
| .....gauuucuuuuuccgucggaagCc.....   | 6    | 1      | S03      |
| .....gauuucuuuuuccgucggaaguc.....   | 426  | 0      | S03      |
| .....gauuucuuuuuccgucggaagucgcuca   | 1    | 0      | S03      |
| .....uuuucuuuuuccgucgga.....        | 3    | 0      | S03      |
| .....uuuucuuuuuccgucgga.....        | 2    | 0      | S03      |
| .....uuuucuuuuuccgucgga.....        | 2    | 0      | S03      |
| .....uuuucuuuuuccgucggaag.....      | 1    | 1      | S03      |
| .....uuuucuuuuuccgucggaag.....      | 2    | 1      | S03      |
| .....uuuucuuuuuccgucggaag.....      | 1    | 1      | S03      |
| .....uuuucuuuuuccgucggaagC.....     | 1    | 1      | S03      |
| .....uuuucuuuuuccgucggaag.....      | 121  | 0      | S03      |
| .....uuuucuuuuuccgucggaagG.....     | 4    | 1      | S03      |
| .....uuuucuuuuuccgucggaagC.....     | 6    | 1      | S03      |
| .....uuuucuuuuuccgucggaagUaugu..... | 1    | 1      | S03      |
| .....uuuucuuuuuccgucggaagA.....     | 6    | 1      | S03      |
| .....uuuucuuuuuccgucggaaguc.....    | 77   | 0      | S03      |
| .....uuuucuuuuuccgucggaagucG.....   | 2    | 1      | S03      |
| .....uuuucuuuuuccgucggaaguc.....    | 1    | 1      | S03      |
| .....uuuucuuuuuccgucggaaguc.....    | 1    | 1      | S03      |
| .....uuuucuuuuuccgucggaaguc.....    | 2    | 1      | S03      |
| .....uuuucuuuuuccgucggaagGc.....    | 1    | 1      | S03      |
| .....uuuucuuuuuccgucggaagAc.....    | 1    | 1      | S03      |
| .....uuuucuuuuuccgucggaaguc.....    | 55   | 0      | S03      |
| .....uuuucuuuuuccgucggaagucc.....   | 150  | 0      | S03      |
| .....uuuucuuuuuccgucggaagucc.....   | 1    | 1      | S03      |
| .....uuuucuuuuuccgucggaagucc.....   | 1    | 1      | S03      |
| .....uuuucuuuuuccgucggaagucc.....   | 1    | 1      | S03      |
| .....uuuucuuuuuccgucggaagucc.....   | 3    | 1      | S03      |
| .....uuuucuuuuuccgucggaagucc.....   | 1    | 1      | S03      |
| .....uuuucuuuuuccgucggaagucc.....   | 1    | 1      | S03      |
| .....uuuucuuuuuccgucggaagucc.....   | 1    | 0      | S03      |
| .....uuuucuuuuuccgucgga.....        | 1    | 0      | S03      |
| .....uuuucuuuuuccgucgga.....        | 1    | 1      | S03      |
| .....uuuucuuuuuccgucgga.....        | 2    | 0      | S03      |
| .....uuuucuuuuuccgucggaag.....      | 13   | 0      | S03      |
| .....uuuucuuuuuccgucggaaguc.....    | 1    | 1      | S03      |
| .....uuuucuuuuuccgucggaagG.....     | 1    | 1      | S03      |
| .....uuuucuuuuuccgucggaaguc.....    | 13   | 0      | S03      |
| .....uuuucuuuuuccgucggaaguc.....    | 1    | 1      | S03      |
| .....uuuucuuuuuccgucggaaguc.....    | 1    | 1      | S03      |
| .....uuuucuuuuuccgucggaagGc.....    | 1    | 1      | S03      |
| .....uuuucuuuuuccgucggaaguc.....    | 2    | 1      | S03      |
| .....uuuucuuuuuccgucggaagucG.....   | 4    | 1      | S03      |
| .....uuuucuuuuuccgucggaaguc.....    | 2    | 1      | S03      |
| .....uuuucuuuuuccgucggaaguc.....    | 1    | 1      | S03      |
| .....uuuucuuuuuccgucggaagCc.....    | 2    | 1      | S03      |
| .....uuuucuuuuuccgucggaaguc.....    | 1    | 1      | S03      |
| .....uuuucuuuuuccgucggaaguc.....    | 2    | 1      | S03      |
| .....uuuucuuuuuccgucggaaguc.....    | 411  | 0      | S03      |
| .....uuuucuuuuuccgucggaaguc.....    | 3    | 1      | S03      |
| .....uuuucuuuuuccgucggaaguc.....    | 1    | 1      | S03      |
| .....uuuucuuuuuccgucggaagAc.....    | 1    | 1      | S03      |
| .....uuuucuuuuuccgucggaagucc.....   | 24   | 0      | S03      |
| .....uuuucuuuuuccgucggaagucc.....   | 1    | 1      | S03      |
| .....uuuucuuuuuccgucggaagucG.....   | 1    | 1      | S03      |

Star

Mature

aauuucccggaauauucccgacggaugaugguuccucggaaauuccgucgguaauuuccgaggaauuuccucgggaauuuccugaggaauucauuuuccgucggaugucgcuca

|                                    |     |   |     |
|------------------------------------|-----|---|-----|
| .....Gucauuuuccgucggaugucc.....    | 1   | 1 | S03 |
| .....uuucauuCuccgucggaugucc.....   | 1   | 1 | S03 |
| .....Auucauuuuccgucggaugucc.....   | 1   | 1 | S03 |
| .....uuucauCuuccgucggauguccg.....  | 1   | 1 | S03 |
| .....uuucauuuuccgucggauguccC.....  | 1   | 1 | S03 |
| .....uuucauuuuccgucggauguccg.....  | 71  | 0 | S03 |
| .....uCucauuuuccgucggauguccg.....  | 1   | 1 | S03 |
| .....uuucauuuuccgucggauguccg.....  | 1   | 1 | S03 |
| .....uuucauuuuccgGcggauguccg.....  | 1   | 1 | S03 |
| .....uuucauuuuccgucggauguccgA..... | 3   | 1 | S03 |
| .....Auucauuuuccgucggauguccg.....  | 1   | 1 | S03 |
| .....uuucauuuuccgucggauguccg.....  | 1   | 1 | S03 |
| .....uuucauuuuccgucggauguccgG..... | 3   | 1 | S03 |
| .....uuucauuuuccgucggauguccg.....  | 69  | 0 | S03 |
| .....uuucauuuuccgucggauguccg.....  | 2   | 0 | S03 |
| .....uuucauuuuccgucggaug.....      | 4   | 0 | S03 |
| .....Gucauuuuccgucggaug.....       | 1   | 1 | S03 |
| .....uuucauuuuccgucggaugG.....     | 1   | 1 | S03 |
| .....uuucauuuuccgucggaug.....      | 1   | 0 | S03 |
| .....Gucauuuuccgucggaug.....       | 1   | 1 | S03 |
| .....uuucauuuuccgucggaug.....      | 63  | 0 | S03 |
| .....uuucauuuuccgucggaugAcc.....   | 1   | 1 | S03 |
| .....uuucauuuuccgucggaugCcc.....   | 1   | 1 | S03 |
| .....uuucauuuuccgucggaugGcc.....   | 1   | 1 | S03 |
| .....uuucauuuuccgucggaugucG.....   | 1   | 1 | S03 |
| .....uuucauuuuccgucggaugucc.....   | 22  | 0 | S03 |
| .....uuucauuuuccgucggauguccg.....  | 26  | 0 | S03 |
| .....uuucauuuuccgGcggauguccg.....  | 1   | 1 | S03 |
| .....uuucauuuuccgucggaugAccg.....  | 1   | 1 | S03 |
| .....uuucauuuuccgucggaugGucc.....  | 1   | 1 | S03 |
| .....uuucauCuuccgucggauguccg.....  | 2   | 1 | S03 |
| .....uuucauuuuccgucggauguccgG..... | 21  | 1 | S03 |
| .....Nucauuuuccgucggauguccg.....   | 1   | 1 | S03 |
| .....uuucauuuuccgucggauguccg.....  | 1   | 1 | S03 |
| .....uuucauuuuccgucggauguccg.....  | 504 | 0 | S03 |
| .....uuucauuuuccgucggaugCccg.....  | 1   | 1 | S03 |
| .....uuucauuuuccgucggauguccCu..... | 3   | 1 | S03 |
| .....uuucauuCuuccgucggauguccg..... | 4   | 1 | S03 |
| .....uuucauuuuccgGcggauguccg.....  | 1   | 1 | S03 |
| .....uGcauuuuccgucggauguccg.....   | 1   | 1 | S03 |
| .....Gucauuuuccgucggauguccg.....   | 4   | 1 | S03 |
| .....uuucauuuuccgucggauguccgA..... | 10  | 1 | S03 |
| .....ucauuuuccgucggaug.....        | 4   | 0 | S03 |
| .....ucauuCuuccgucggaug.....       | 1   | 1 | S03 |
| .....ucauuuuccgucggaugC.....       | 1   | 1 | S03 |
| .....ucauuuuccgucggauguc.....      | 16  | 0 | S03 |
| .....ucauuuuccgucggaugucc.....     | 5   | 0 | S03 |
| .....ucauuuuccgucggauguccg.....    | 14  | 0 | S03 |
| .....ucauuuuccgucggauguccg.....    | 15  | 0 | S03 |
| .....ucauuuuccgucggauguccguc.....  | 23  | 0 | S03 |
| .....cauuuuccgucggauguc.....       | 3   | 0 | S03 |
| .....cauuuuccgucggaugucc.....      | 2   | 0 | S03 |
| .....cauuuuccgucggaugCccg.....     | 1   | 1 | S03 |
| .....cauuuuccgucggauguccg.....     | 10  | 0 | S03 |
| .....cauuuuccgucggauguccg.....     | 74  | 0 | S03 |
| .....caCuuccgucggauguccg.....      | 1   | 1 | S03 |
| .....cauuuuccgucggauguccgG.....    | 4   | 1 | S03 |
| .....cauuuuccgucggauguccgA.....    | 3   | 1 | S03 |
| .....Nauuuuccgucggauguccg.....     | 1   | 1 | S03 |
| .....cauuuuccgucggauguccguc.....   | 2   | 0 | S03 |
| .....cauuuuccgucggauguccguc.....   | 16  | 0 | S03 |
| .....auuuuccgucggauguc.....        | 1   | 0 | S03 |
| .....auuuuccgucggaugucc.....       | 3   | 0 | S03 |
| .....auuuuccgucggauguccg.....      | 4   | 0 | S03 |
| .....auuuuccgucggauguccgG.....     | 8   | 1 | S03 |
| .....auuuuccgucggauguccgA.....     | 4   | 1 | S03 |
| .....auuuuccgucggauguccg.....      | 63  | 0 | S03 |
| .....auuuuccgucggauguccguc.....    | 6   | 0 | S03 |
| .....auuuuccgucggauguccgAca.....   | 1   | 1 | S03 |
| .....auuuuccgucggauguccguc.....    | 46  | 0 | S03 |



Star

Mature

| Sequence                                                                                                                | Star | Mature | Category |
|-------------------------------------------------------------------------------------------------------------------------|------|--------|----------|
| .....aauuucccggaaauuuccgacggauugauguuccucggaaauuccgucgguaauuuccgaggaauuuccucgggaaauuccugaggauucaaauuuccgucggaaugucgguca | 1    | 1      | S04      |
| .....aauuuccgacggauugauU.....                                                                                           | 9    | 0      | S04      |
| .....aauuuccgacggauugaug.....                                                                                           | 1    | 1      | S04      |
| .....aauuuccgacggauugaugguuA.....                                                                                       | 5    | 0      | S04      |
| .....aauuuccgacggauugaugguucc.....                                                                                      | 1    | 1      | S04      |
| .....auuccgacggauugaugguuccU.....                                                                                       | 1    | 0      | S04      |
| .....cgcacggauugaugguuccu.....                                                                                          | 1    | 0      | S04      |
| .....acggauugaugguuccucggaaau.....                                                                                      | 1    | 0      | S04      |
| .....acggauuAaugguuccucggaaau.....                                                                                      | 1    | 1      | S04      |
| .....gauugaugguuccucggaauc.....                                                                                         | 1    | 0      | S04      |
| .....gguuccucggaaauuccgucA.....                                                                                         | 1    | 1      | S04      |
| .....uuccucggaaauuccgucggua.....                                                                                        | 1    | 0      | S04      |
| .....uuccucggaaauuccgucgguaauA.....                                                                                     | 1    | 0      | S04      |
| .....uuccucggaaauuccgucgguaauG.....                                                                                     | 4    | 1      | S04      |
| .....uuccucggaaauuccgucgguaauu.....                                                                                     | 1    | 0      | S04      |
| .....uccucggaaauuccgucggua.....                                                                                         | 1    | 0      | S04      |
| .....uccucggaaauuccgucggua.....                                                                                         | 1    | 0      | S04      |
| .....ucAucggaaauuccgucgguaauuu.....                                                                                     | 1    | 1      | S04      |
| .....uccucggaaauuccgucgguaauuu.....                                                                                     | 4    | 0      | S04      |
| .....ccucggaaauuccgucgguaauuu.....                                                                                      | 3    | 0      | S04      |
| .....ccucggaaauuccgucgguaauuuc.....                                                                                     | 19   | 0      | S04      |
| .....cucggaaauuccgucggua.....                                                                                           | 6    | 0      | S04      |
| .....cucggaaauuccgucgguaauA.....                                                                                        | 1    | 0      | S04      |
| .....cucggaaauuccgucgguaauu.....                                                                                        | 3    | 0      | S04      |
| .....cucggaaauuccgucgguaauuu.....                                                                                       | 60   | 0      | S04      |
| .....cucggGauuccgucgguaauuu.....                                                                                        | 1    | 1      | S04      |
| .....cucggaaauuccgucgguaauuuc.....                                                                                      | 23   | 0      | S04      |
| .....cucggaaauuccgucgguaauuG.....                                                                                       | 1    | 1      | S04      |
| .....Nucggaaauuccgucgguaauuucc.....                                                                                     | 1    | 1      | S04      |
| .....cucggaaauuccgucgguaauuucc.....                                                                                     | 29   | 0      | S04      |
| .....ucggaaauuccgucgguaau.....                                                                                          | 2    | 0      | S04      |
| .....ucggaaauuccgucgguaG.....                                                                                           | 1    | 1      | S04      |
| .....ucggaaauuccgucgguaauA.....                                                                                         | 4    | 0      | S04      |
| .....ucggaaauuccgucgguaauuu.....                                                                                        | 2    | 0      | S04      |
| .....ucggaaauuccgucgguaauuu.....                                                                                        | 30   | 0      | S04      |
| .....ucggaaauuccgucgguaauuuc.....                                                                                       | 85   | 0      | S04      |
| .....Ncggaaauuccgucgguaauuuc.....                                                                                       | 1    | 1      | S04      |
| .....ucggaaauuccgGcgguaauuuc.....                                                                                       | 1    | 1      | S04      |
| .....cgaaauuccgucgguaauA.....                                                                                           | 1    | 0      | S04      |
| .....cgaaauuccgucgguaauuu.....                                                                                          | 1    | 0      | S04      |
| .....cgaaauuccgucgguaauuu.....                                                                                          | 8    | 0      | S04      |
| .....cgaaauuccgucgguaauuuG.....                                                                                         | 1    | 1      | S04      |
| .....cgaaauuccgucgguaauuuc.....                                                                                         | 23   | 0      | S04      |
| .....cgaaauuccgucgguaauuucc.....                                                                                        | 3    | 0      | S04      |
| .....cgaaauuccgucgguaauuuccC.....                                                                                       | 1    | 1      | S04      |
| .....cgaaauuccgucgguaauuuccg.....                                                                                       | 1    | 0      | S04      |
| .....ggaauuccgucgguaauu.....                                                                                            | 1    | 0      | S04      |
| .....ggaauuccgucgguaauuu.....                                                                                           | 13   | 0      | S04      |
| .....ggaauuccgucgguaauuuc.....                                                                                          | 5    | 0      | S04      |
| .....ggaauuccgucgguaauuuccg.....                                                                                        | 1    | 0      | S04      |
| .....ggaauuccgucgguaauuuccga.....                                                                                       | 2    | 0      | S04      |
| .....ggaauuccgucgguaauuuccgag.....                                                                                      | 9    | 0      | S04      |
| .....gaaauuccgucgguaauuu.....                                                                                           | 1    | 0      | S04      |
| .....gaaauuccgucgguaauuuc.....                                                                                          | 9    | 0      | S04      |
| .....gaaauuccgucgguaauuucc.....                                                                                         | 13   | 0      | S04      |
| .....gUauuccgucgguaauuuccg.....                                                                                         | 1    | 1      | S04      |
| .....gaaauuccgucgguaauuuccg.....                                                                                        | 74   | 0      | S04      |
| .....gaaauuccgucgguaauuuccga.....                                                                                       | 10   | 0      | S04      |
| .....gaaauuccgucgguaauuuccgag.....                                                                                      | 4    | 0      | S04      |
| .....gaaauuccgucgguaauuuccgagg.....                                                                                     | 1    | 0      | S04      |
| .....aaauuccgucgguaauuuc.....                                                                                           | 2    | 0      | S04      |
| .....aaauuccgucgguaauuucc.....                                                                                          | 16   | 0      | S04      |
| .....Nauuccgucgguaauuuccg.....                                                                                          | 1    | 1      | S04      |
| .....aaauuccgucgguaauuuccC.....                                                                                         | 1    | 1      | S04      |
| .....aaauuccgucgguaauuuccg.....                                                                                         | 21   | 0      | S04      |
| .....aaauuccgGcgguaauuuccg.....                                                                                         | 1    | 1      | S04      |
| .....aaauuccgucgguaauuuccga.....                                                                                        | 8    | 0      | S04      |
| .....aaauuccgucgguaauuuccgag.....                                                                                       | 3    | 0      | S04      |
| .....aaauuccgucgguaauuuccgagg.....                                                                                      | 2    | 0      | S04      |
| .....aaauuccgucgguaauuuccgagga.....                                                                                     | 8    | 0      | S04      |
| .....auuccgucgguaauuucc.....                                                                                            | 9    | 0      | S04      |

Star

Mature

aaauucccggaauauuccgacggauugaugguuccucggaaauccgucgguaauauuccgaggaauuccucgggaauucugaggauuauuccgucggaaugucgguca

|                               |     |   |     |
|-------------------------------|-----|---|-----|
| .auucGgucgguaauuucc.          | 1   | 1 | S04 |
| .auuccgucgguaauuuccg.         | 12  | 0 | S04 |
| .auuccgucgguaauuuccgC.        | 1   | 1 | S04 |
| .auuccgucgguaauuuccgag.       | 3   | 0 | S04 |
| .auuccgucgguaauuuccgagg.      | 11  | 0 | S04 |
| .uuccgucgguaauuuccg.          | 2   | 0 | S04 |
| .uuccgucgguaauuuccgag.        | 1   | 0 | S04 |
| .uccgucgguaauuuccga.          | 1   | 0 | S04 |
| .aaaauuccucgggaauuuccga.      | 1   | 0 | S04 |
| .ucgggaauuuccgaggau.          | 1   | 0 | S04 |
| .ucgggaauuuccgaggauuucauu.    | 1   | 0 | S04 |
| .aaucugaggauuuccauuuuccgu.    | 1   | 0 | S04 |
| .auucgaggauuuccauuuuccguc.    | 1   | 0 | S04 |
| .gaggauuuccauuuuccgucgg.      | 2   | 0 | S04 |
| .gaggauuuccaCuuccgucgga.      | 1   | 1 | S04 |
| .gaggauuuccauuCuccgucgga.     | 1   | 1 | S04 |
| .gaggauuuccauuuuccgucgga.     | 6   | 0 | S04 |
| .gaggauuuccauuuuccgucgga.     | 4   | 0 | S04 |
| .gaggauuuccauuuuccgucggaG.    | 1   | 1 | S04 |
| .gaggauuuccauuuGccgucggaau.   | 1   | 1 | S04 |
| .gaggauuuccauuuuccgucggaau.   | 66  | 0 | S04 |
| .gaggauuuccauuuuccgucggaA.    | 1   | 1 | S04 |
| .gaggauuuccauuuuccgucggaaug.  | 7   | 0 | S04 |
| .gaggauuuccauuuuccgucggaaugu. | 1   | 0 | S04 |
| .gaggauuuccauuuuccgucggauguc. | 1   | 0 | S04 |
| .aggauuuccauuuuccgucgg.       | 1   | 0 | S04 |
| .aggauuuccauuuuccgucggC.      | 1   | 1 | S04 |
| .aggauuuccauuuuccgucgga.      | 11  | 0 | S04 |
| .aggauuuccauuuuccgucgga.      | 2   | 0 | S04 |
| .aggauuuccaCuuccgucggaau.     | 1   | 1 | S04 |
| .aggauuuccauuuuccgucggaau.    | 3   | 0 | S04 |
| .aggaaAuuccauuuuccgucggaau.   | 1   | 1 | S04 |
| .aggauuuccauuuuccgucggUaug.   | 1   | 1 | S04 |
| .Uggauuuccauuuuccgucggaaug.   | 1   | 1 | S04 |
| .aggauuuccaCuuccgucggaaug.    | 2   | 1 | S04 |
| .aggauuuccaCuuccgucggaaug.    | 1   | 1 | S04 |
| .aggauCucauuuuccgucggaaug.    | 2   | 1 | S04 |
| .aggauuuccauuCuccgucggaaug.   | 4   | 1 | S04 |
| .aggauuuccauuuuccgucggaGg.    | 2   | 1 | S04 |
| .aggauuuccauuuuccgucggaaug.   | 463 | 0 | S04 |
| .aggauuuccauuuuccgucggaugA.   | 1   | 1 | S04 |
| .aggauuuccauuuuccgucggaaugu.  | 1   | 0 | S04 |
| .ggauuuccauuuuccgucgg.        | 3   | 0 | S04 |
| .ggauuuccauuuuccgucgga.       | 6   | 0 | S04 |
| .ggauuuccauuuuccgucgga.       | 2   | 0 | S04 |
| .ggauuuccauuuuccgucggaau.     | 9   | 0 | S04 |
| .ggauuuccauuuuccgucggaaug.    | 74  | 0 | S04 |
| .Ngauuuccauuuuccgucggaaug.    | 1   | 1 | S04 |
| .ggauuuccauuCuccgucggaaug.    | 1   | 1 | S04 |
| .ggauuuccaCuuccgucggaaugu.    | 1   | 1 | S04 |
| .ggauuuccauuuAuccgucggaaugu.  | 1   | 1 | S04 |
| .ggauuuccauuuuccgucggaaugu.   | 134 | 0 | S04 |
| .ggauuuccauuCuccgucggaaugu.   | 1   | 1 | S04 |
| .ggauuuccauuuuccgucggaugA.    | 8   | 1 | S04 |
| .ggauuuccauuuuccgucggaugC.    | 19  | 1 | S04 |
| .ggauuuccauuuuccgucggaugG.    | 7   | 1 | S04 |
| .ggauuuccauuuuccgucggaugG.    | 2   | 1 | S04 |
| .gauuuccauuuuccgucgg.         | 1   | 0 | S04 |
| .gauuuccauuuuccgucgga.        | 4   | 0 | S04 |
| .gauuuccauuuuccgucggU.        | 1   | 1 | S04 |
| .gauuuccauuuuccgucggaC.       | 1   | 1 | S04 |
| .gauuuccauuuuccgucgga.        | 5   | 0 | S04 |
| .gauuuccauuuuccgucggaau.      | 6   | 0 | S04 |
| .gauGuccauuuuccgucggaaug.     | 1   | 1 | S04 |
| .gauuuccauuuuccgucggaauC.     | 1   | 1 | S04 |
| .gauuuccauuuuccgucggaaug.     | 177 | 0 | S04 |
| .gCuuccauuuuccgucggaaug.      | 1   | 1 | S04 |
| .gauuuccauuuuccgucggaugA.     | 8   | 1 | S04 |
| .gauuuccauuuuccgucggaugC.     | 2   | 1 | S04 |
| .gauuuccauuuuccgucggaaugu.    | 6   | 0 | S04 |

Star

Mature

| Sequence                                                                                                | Star | Mature | Category |
|---------------------------------------------------------------------------------------------------------|------|--------|----------|
| aauuucccggaauauuccgacggaugauguuccucggaaauuccgucgguaauuuccgaggaauuccucgggaaauucugaggauuuccgucggaugucgucg |      |        |          |
| .....gauuucuuuuuccgucggaugGc.....                                                                       | 2    | 1      | S04      |
| .....gauuucuuuuuccgucggaugG.....                                                                        | 1    | 1      | S04      |
| .....gauuucuuuuuccgucggaugG.....                                                                        | 563  | 0      | S04      |
| .....gauCuuuuuccgucggaugG.....                                                                          | 1    | 1      | S04      |
| .....gauuucuuuuuccgucggaugG.....                                                                        | 5    | 1      | S04      |
| .....gauuucuuuuuccgucggaugG.....                                                                        | 3    | 1      | S04      |
| .....gauuucuuuuuccgucggaugG.....                                                                        | 3    | 1      | S04      |
| .....gauuucuuuuuccgucggaugG.....                                                                        | 1    | 1      | S04      |
| .....gauuucuuuuuccgucggaugG.....                                                                        | 1    | 1      | S04      |
| .....gauuucuuuuuccgucggaugG.....                                                                        | 2    | 1      | S04      |
| .....uuuucuuuuuccgucgga.....                                                                            | 4    | 0      | S04      |
| .....uuuucuuuuuccgucgga.....                                                                            | 2    | 0      | S04      |
| .....uuuucuuuuuccgucgga.....                                                                            | 6    | 0      | S04      |
| .....uuuucuuuuuccgucgga.....                                                                            | 114  | 0      | S04      |
| .....auGuuuuuuccgucggaug.....                                                                           | 1    | 1      | S04      |
| .....aGuuuuuuccgucggaug.....                                                                            | 1    | 1      | S04      |
| .....uuuucuuuuuccgucggaugA.....                                                                         | 10   | 1      | S04      |
| .....uuuucuuuuuccgucggaugG.....                                                                         | 1    | 1      | S04      |
| .....uuuucuuuuuccgucggaugG.....                                                                         | 1    | 1      | S04      |
| .....uuuucuuuuuccgucggaugG.....                                                                         | 54   | 0      | S04      |
| .....uuuucuuuuuccgucggaugG.....                                                                         | 1    | 1      | S04      |
| .....uuuucuuuuuccgucggaugG.....                                                                         | 13   | 1      | S04      |
| .....uuuucuuuuuccgucggaugG.....                                                                         | 7    | 1      | S04      |
| .....uuuucuuuuuccgucggaugG.....                                                                         | 1    | 1      | S04      |
| .....uuuucuuuuuccgucggaugG.....                                                                         | 1    | 1      | S04      |
| .....uuuucuuuuuccgucggaugG.....                                                                         | 1    | 1      | S04      |
| .....uuuucuuuuuccgucggaugG.....                                                                         | 68   | 0      | S04      |
| .....uuuucuuuuuccgucggaugG.....                                                                         | 2    | 1      | S04      |
| .....uuuucuuuuuccgucggaugG.....                                                                         | 1    | 1      | S04      |
| .....uuuucuuuuuccgucggaugG.....                                                                         | 1    | 1      | S04      |
| .....uuuucuuuuuccgucggaugG.....                                                                         | 1    | 1      | S04      |
| .....uuuucuuuuuccgucggaugG.....                                                                         | 239  | 0      | S04      |
| .....uuuucuuuuuccgucggaugG.....                                                                         | 1    | 1      | S04      |
| .....uuuucuuuuuccgucggaugG.....                                                                         | 1    | 1      | S04      |
| .....uuuucuuuuuccgucggaugG.....                                                                         | 2    | 1      | S04      |
| .....uuuucuuuuuccgucggaugG.....                                                                         | 2    | 1      | S04      |
| .....uuuucuuuuuccgucggaugG.....                                                                         | 1    | 1      | S04      |
| .....uuuucuuuuuccgucggaugG.....                                                                         | 1    | 0      | S04      |
| .....uuuucuuuuuccgucgga.....                                                                            | 2    | 0      | S04      |
| .....uuuucuuuuuccgucgga.....                                                                            | 2    | 0      | S04      |
| .....uuuucuuuuuccgucgga.....                                                                            | 20   | 0      | S04      |
| .....uuuucuuuuuccgucggaugG.....                                                                         | 3    | 1      | S04      |
| .....uuuucuuuuuccgucggaugG.....                                                                         | 2    | 1      | S04      |
| .....uuuucuuuuuccgucggaugG.....                                                                         | 14   | 0      | S04      |
| .....uuuucuuuuuccgucggaugG.....                                                                         | 1    | 1      | S04      |
| .....uuuucuuuuuccgucggaugG.....                                                                         | 3    | 1      | S04      |
| .....uuuucuuuuuccgucggaugG.....                                                                         | 1    | 1      | S04      |
| .....uuuucuuuuuccgucggaugG.....                                                                         | 2    | 1      | S04      |
| .....uuuucuuuuuccgucggaugG.....                                                                         | 3    | 1      | S04      |
| .....uuuucuuuuuccgucggaugG.....                                                                         | 1    | 1      | S04      |
| .....uuuucuuuuuccgucggaugG.....                                                                         | 1    | 1      | S04      |
| .....uuuucuuuuuccgucggaugG.....                                                                         | 3    | 1      | S04      |
| .....uuuucuuuuuccgucggaugG.....                                                                         | 11   | 1      | S04      |
| .....uuuucuuuuuccgucggaugG.....                                                                         | 2    | 1      | S04      |
| .....uuuucuuuuuccgucggaugG.....                                                                         | 1    | 1      | S04      |
| .....uuuucuuuuuccgucggaugG.....                                                                         | 1    | 1      | S04      |
| .....uuuucuuuuuccgucggaugG.....                                                                         | 385  | 0      | S04      |
| .....uuuucuuuuuccgucggaugG.....                                                                         | 1    | 1      | S04      |
| .....uuuucuuuuuccgucggaugG.....                                                                         | 3    | 1      | S04      |
| .....uuuucuuuuuccgucggaugG.....                                                                         | 1    | 1      | S04      |
| .....uuuucuuuuuccgucggaugG.....                                                                         | 24   | 0      | S04      |
| .....uuuucuuuuuccgucggaugG.....                                                                         | 1    | 1      | S04      |
| .....uuuucuuuuuccgucggaugG.....                                                                         | 3    | 1      | S04      |
| .....uuuucuuuuuccgucggaugG.....                                                                         | 118  | 0      | S04      |
| .....uuuucuuuuuccgucggaugG.....                                                                         | 2    | 1      | S04      |
| .....uuuucuuuuuccgucggaugG.....                                                                         | 1    | 1      | S04      |
| .....uuuucuuuuuccgucggaugG.....                                                                         | 1    | 1      | S04      |

Star

Mature

|                                                                                                              |     |   |     |
|--------------------------------------------------------------------------------------------------------------|-----|---|-----|
| aauuucccggaauauuccgacggaugaugguuccucggaauuccgucgguuuauuccgaggaauuccucggaauuccugaggaauucauuuccgucggaugucgcuca |     |   |     |
| .....uucauuuccgucggUauguccgu..                                                                               | 1   | 1 | S04 |
| .....uucauuuccgucggauguccgu..                                                                                | 100 | 0 | S04 |
| .....uucauuuccgucggauguccgG..                                                                                | 7   | 1 | S04 |
| .....uucauuuccgucggauguccgA..                                                                                | 2   | 1 | S04 |
| .....uucauuuccgucggaugCccgu..                                                                                | 1   | 1 | S04 |
| .....uucuuuccgucggaau.....                                                                                   | 2   | 0 | S04 |
| .....uucauuuccgucggaaug.....                                                                                 | 2   | 0 | S04 |
| .....uucauuuccgucggaugC.....                                                                                 | 1   | 1 | S04 |
| .....uucuuuccgucggaaugu.....                                                                                 | 1   | 0 | S04 |
| .....uucauuuccgucggaaguc.....                                                                                | 1   | 1 | S04 |
| .....uucauuuccgucggauguc.....                                                                                | 63  | 0 | S04 |
| .....Nucauuuccgucggauguc.....                                                                                | 1   | 1 | S04 |
| .....uucauuuccgucggaugug.....                                                                                | 3   | 1 | S04 |
| .....uucauuuccgucggaugucc.....                                                                               | 38  | 0 | S04 |
| .....uGcauuuccgucggaugucc.....                                                                               | 1   | 1 | S04 |
| .....uucauuuccgucggauguccg.....                                                                              | 31  | 0 | S04 |
| .....uucauuuccgucggauguccC.....                                                                              | 2   | 1 | S04 |
| .....uucauuuccgucggauguccgu.....                                                                             | 1   | 1 | S04 |
| .....uucauuuccgucggaugAccgu..                                                                                | 1   | 1 | S04 |
| .....uucauuuccgucggaauCuccgu..                                                                               | 1   | 1 | S04 |
| .....uGcauuuccgucggauguccgu..                                                                                | 2   | 1 | S04 |
| .....uucauuuccgucggaugCccgu..                                                                                | 1   | 1 | S04 |
| .....uucauuuccgucggaugGccgu..                                                                                | 1   | 1 | S04 |
| .....Gucauuuccgucggauguccgu..                                                                                | 1   | 1 | S04 |
| .....uucauuuccgucggauguccgG..                                                                                | 39  | 1 | S04 |
| .....uucauuuccgucggauguccgu..                                                                                | 543 | 0 | S04 |
| .....uucauuuccgucggauguccCu..                                                                                | 3   | 1 | S04 |
| .....Nucauuuccgucggauguccgu..                                                                                | 1   | 1 | S04 |
| .....uucauuCuccgucggauguccgu..                                                                               | 3   | 1 | S04 |
| .....uucauuuccgucggauguccgu..                                                                                | 4   | 1 | S04 |
| .....uucauCuuccgucggauguccgu..                                                                               | 2   | 1 | S04 |
| .....uucauuuccgucggauguccgA..                                                                                | 28  | 1 | S04 |
| .....uucauuuccgucggauguccguc..                                                                               | 1   | 0 | S04 |
| .....ucauuuccgucggaaug.....                                                                                  | 2   | 0 | S04 |
| .....ucauuuccgucggaaugu.....                                                                                 | 4   | 0 | S04 |
| .....ucauuuccgucggaauguG.....                                                                                | 1   | 1 | S04 |
| .....ucauuuccgucggaauguc.....                                                                                | 17  | 0 | S04 |
| .....ucauuCuccgucggaauguc.....                                                                               | 1   | 1 | S04 |
| .....ucauuuccgucggaaugucG.....                                                                               | 1   | 1 | S04 |
| .....ucauuuccgucggaaugucc.....                                                                               | 13  | 0 | S04 |
| .....ucauuuccgucggaauguccg.....                                                                              | 30  | 0 | S04 |
| .....ucauuuccgucggaaguccgu..                                                                                 | 1   | 1 | S04 |
| .....ucauuuccgucggauguccgA..                                                                                 | 1   | 1 | S04 |
| .....ucauuuccgucggauguccgG..                                                                                 | 2   | 1 | S04 |
| .....ucauuuccgucggauguccgu..                                                                                 | 36  | 0 | S04 |
| .....Ncauuuccgucggauguccguc..                                                                                | 1   | 1 | S04 |
| .....ucauuuccgucggauguccguc..                                                                                | 26  | 0 | S04 |
| .....ucauCuuccgucggauguccguc..                                                                               | 1   | 1 | S04 |
| .....cauuuccgucggaaugu.....                                                                                  | 5   | 0 | S04 |
| .....cauuuccgucggaauguc.....                                                                                 | 2   | 0 | S04 |
| .....cauuuccgucggaaugucc.....                                                                                | 3   | 0 | S04 |
| .....cauuuccgucggauguccg.....                                                                                | 20  | 0 | S04 |
| .....cauuuccgucggaugGccgu..                                                                                  | 1   | 1 | S04 |
| .....cauuuccgucggauguccgu..                                                                                  | 87  | 0 | S04 |
| .....caCuuccgucggauguccgu..                                                                                  | 1   | 1 | S04 |
| .....cauuuccgucggauguccgA..                                                                                  | 6   | 1 | S04 |
| .....cauuuccgucggauguccgG..                                                                                  | 4   | 1 | S04 |
| .....Gauuuuccgucggauguccgu..                                                                                 | 1   | 1 | S04 |
| .....cauuuccgucggauguccguc..                                                                                 | 1   | 0 | S04 |
| .....cauuuccgucggauguccguca                                                                                  | 17  | 0 | S04 |
| .....auuuuccgucggaauguc.....                                                                                 | 3   | 0 | S04 |
| .....auuuuccgucggaaugucc.....                                                                                | 6   | 0 | S04 |
| .....auuuuccgucggaauguccg.....                                                                               | 8   | 0 | S04 |
| .....auuuuccgucggaauguccC.....                                                                               | 1   | 1 | S04 |
| .....auuuuccgucggauguccgG..                                                                                  | 1   | 1 | S04 |
| .....auuuuccgucggauguccgA..                                                                                  | 3   | 1 | S04 |
| .....auuuuccgucggauguccgu..                                                                                  | 71  | 0 | S04 |
| .....auuuuccgucggauguccguc..                                                                                 | 15  | 0 | S04 |
| .....Nuuuuccgucggauguccguc..                                                                                 | 1   | 1 | S04 |
| .....auuuuccgucggauguccguca                                                                                  | 70  | 0 | S04 |

Star

Mature

|                                                                                                                                                                                  |    |   |     |
|----------------------------------------------------------------------------------------------------------------------------------------------------------------------------------|----|---|-----|
| aauuucccggaauuuccgacggauugaug <u>gu</u> uccucggaa <u>uu</u> ccgucggua <u>uu</u> auuccgagga <u>aaa</u> uuccucgggaa <u>uu</u> ucugaggau <u>uu</u> cauuuccgucggaauguc <u>cg</u> uca |    |   |     |
| .....auGuccgucggaauguc <u>cg</u> uca                                                                                                                                             | 1  | 1 | S04 |
| .....auuCuccgucggaauguc <u>cg</u> uca                                                                                                                                            | 1  | 1 | S04 |
| .....uuuccgucggaauguc <u>c</u> ...                                                                                                                                               | 3  | 0 | S04 |
| .....uuuccgucggaauguc <u>g</u> ...                                                                                                                                               | 6  | 0 | S04 |
| .....uuuccgucggaauguc <u>c</u> ...                                                                                                                                               | 1  | 1 | S04 |
| .....uuuccgucggaauguc <u>g</u> ...                                                                                                                                               | 1  | 1 | S04 |
| .....uuuccgucggaauguc <u>g</u> ...                                                                                                                                               | 21 | 0 | S04 |
| .....uuuccgucggaauguc <u>cg</u> A..                                                                                                                                              | 1  | 1 | S04 |
| .....uuuccgucggaauguc <u>cg</u> uc.                                                                                                                                              | 3  | 0 | S04 |
| .....uuuccgucggaauguc <u>cg</u> uca                                                                                                                                              | 13 | 0 | S04 |
| .....uuuccgucggaauguc <u>cg</u> ...                                                                                                                                              | 3  | 0 | S04 |
| .....uuuccgucggaauguc <u>cg</u> ...                                                                                                                                              | 1  | 1 | S04 |
| .....uuuccgucggaauguc <u>cg</u> ...                                                                                                                                              | 7  | 0 | S04 |
| .....uuuccgucggaauguc <u>cg</u> uca                                                                                                                                              | 3  | 0 | S04 |
| .....Nuccgucggaauguc <u>cg</u> ...                                                                                                                                               | 1  | 1 | S04 |
| .....uuccgucggaauguc <u>cg</u> ...                                                                                                                                               | 3  | 0 | S04 |
| .....uuccgucggaauguc <u>cg</u> uca                                                                                                                                               | 3  | 0 | S04 |
| .....uccgucggaauguc <u>cg</u> uc.                                                                                                                                                | 3  | 0 | S04 |
| .....uccgucggaauguc <u>cg</u> uca                                                                                                                                                | 3  | 0 | S04 |
| .....ccgucggaauguc <u>cg</u> uca                                                                                                                                                 | 4  | 0 | S04 |



Provisional ID : chrC03\_1383226  
 Score total : 43.1  
 Score for star read(s) : 3.9  
 Score for read counts : 39.4  
 Score for mfe : -0.1  
 Score for randfold : 0  
 Score for cons. seed :  
 Total read count : 89  
 Mature read count : 83  
 Loop read count : 0  
 Star read count : 6

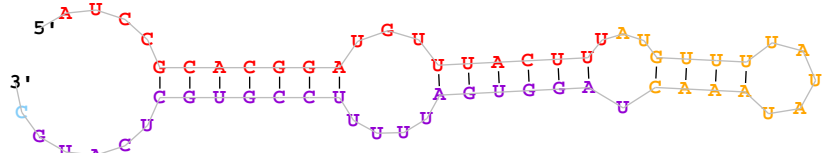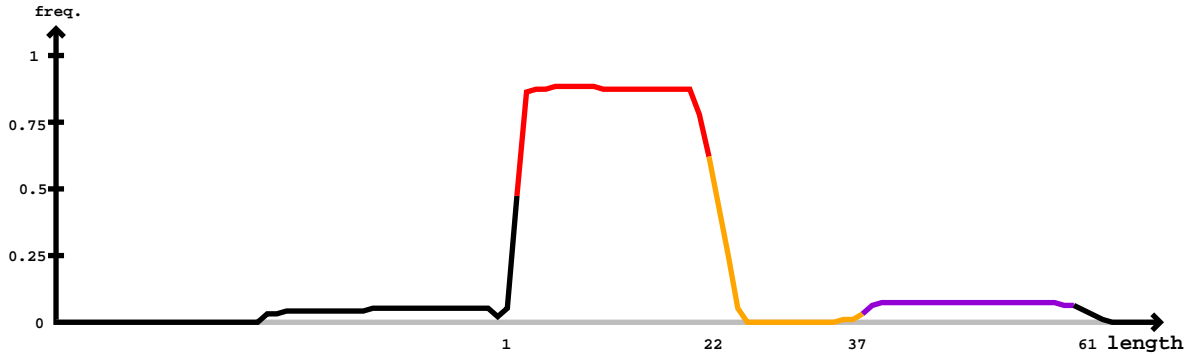

**Mature** **Star**

| 5' -                                                                                                                  | -3' | obs   | mm | sample |
|-----------------------------------------------------------------------------------------------------------------------|-----|-------|----|--------|
| cacuuucgagcauuucuuuuuaugacaaguagauuuugaaccucgcauccgcacggcaggauguuuacuuuauguuuuauuaaaacuaggugauuuuuccgugcucaugcacaugua |     | exp   |    |        |
| .....((((((((((((((((.....)))))))))).....((((((((((((((((.....)))))))))).....)))))))).....                            |     | reads |    |        |
| .....gauuuugaaccucgcauccgcacU.....                                                                                    |     | 1     | 1  | S03    |
| .....cauccgcacggGuguuuacuu.....                                                                                       |     | 1     | 1  | S03    |
| .....cauccgcacggGuguuuacuuu.....                                                                                      |     | 1     | 1  | S03    |
| .....cauccgcacggGuguuuacuuua.....                                                                                     |     | 1     | 1  | S03    |
| .....auccgcacggGuguuuacu.....                                                                                         |     | 1     | 1  | S03    |
| .....auccgcacggGuguuuacuu.....                                                                                        |     | 5     | 1  | S03    |
| .....auccgcacggGuguuuacuuu.....                                                                                       |     | 9     | 1  | S03    |
| .....auccgcacggGuguuuacuuua.....                                                                                      |     | 4     | 1  | S03    |
| .....auccgcacggGuguuuacuuuau.....                                                                                     |     | 4     | 1  | S03    |
| .....auccgcacggGuguuuacuuuuU.....                                                                                     |     | 1     | 1  | S03    |
| .....uccgcacggGuguuuacu.....                                                                                          |     | 5     | 1  | S03    |
| .....uccgcacggGuguuuacuu.....                                                                                         |     | 1     | 1  | S03    |
| .....uccgcacggGuguuuacuuu.....                                                                                        |     | 3     | 1  | S03    |
| .....uccgcacggGuguuuacuuua.....                                                                                       |     | 1     | 0  | S03    |
| .....uccgcacggGuguuuacuuua.....                                                                                       |     | 1     | 1  | S03    |
| .....uccgcacggGuguuuacuuuau.....                                                                                      |     | 4     | 1  | S03    |
| .....uccgcacggGuguuuacuuuaug.....                                                                                     |     | 1     | 1  | S03    |
| .....ccgcacggGuguuuacuuuaug.....                                                                                      |     | 1     | 1  | S03    |
| .....uaggugauuuuuccgugcucaug.....                                                                                     |     | 1     | 0  | S03    |
| .....uaggugauuuuuccgugcucauU.....                                                                                     |     | 1     | 1  | S03    |
| .....aggugauuuuuccgugcucaugcaA.....                                                                                   |     | 1     | 1  | S03    |
| .....ggugauuuuuccgugcucaugca.....                                                                                     |     | 1     | 0  | S03    |
| .....aaugacaaguagauuuugaaccu.....                                                                                     |     | 2     | 0  | S04    |
| .....aaugacaaguagauuuugaaccA.....                                                                                     |     | 1     | 1  | S04    |
| .....ugacaaguagauuuugaaccucgC.....                                                                                    |     | 1     | 0  | S04    |
| .....auccgcacggGuguuuacuu.....                                                                                        |     | 3     | 1  | S04    |
| .....auccgcacggGuguuuacuuu.....                                                                                       |     | 7     | 1  | S04    |
| .....auccgcacggGuguuuacuuua.....                                                                                      |     | 5     | 1  | S04    |
| .....auccgcacggGuguuuacuuuau.....                                                                                     |     | 2     | 1  | S04    |
| .....uccgcacggGuguuuacu.....                                                                                          |     | 3     | 1  | S04    |
| .....uccgcacggGuguuuacuu.....                                                                                         |     | 5     | 1  | S04    |
| .....uccgcacggGuguuuacuuua.....                                                                                       |     | 3     | 1  | S04    |

Mature

Star

|                                                                                                                                           |   |   |     |
|-------------------------------------------------------------------------------------------------------------------------------------------|---|---|-----|
| cacuuucgagcauuucuuuaaugacaaguagauuuugaaccugc <u>auccgcacgg</u> auguuuacuuu <u>auguuuuauauaaac</u> uaggugauuuu <u>uccgugc</u> caugcacaugua |   |   |     |
| .....uccgcacgg <u>G</u> uguuuacuuuu.....                                                                                                  | 9 | 1 | S04 |
| .....uccgcacgg <u>G</u> auguuuacuuuuug.....                                                                                               | 1 | 0 | S04 |
| .....gcacgg <u>G</u> uguuuacuuuuug.....                                                                                                   | 1 | 1 | S04 |
| .....acuaggugauuuu <u>uccgugc</u> u <u>U</u> .....                                                                                        | 1 | 1 | S04 |
| .....aggugauuuu <u>uccgugc</u> caug.....                                                                                                  | 1 | 0 | S04 |
| .....aggugauuuu <u>A</u> cgugc <u>caugc</u> .....                                                                                         | 1 | 1 | S04 |



Provisional ID : chrC03\_1394226  
 Score total : 1  
 Score for star read(s) : -1.3  
 Score for read counts : 0  
 Score for mfe : 2.3  
 Score for randfold : 0  
 Score for cons. seed :  
 Total read count : 119  
 Mature read count : 117  
 Loop read count : 0  
 Star read count : 2

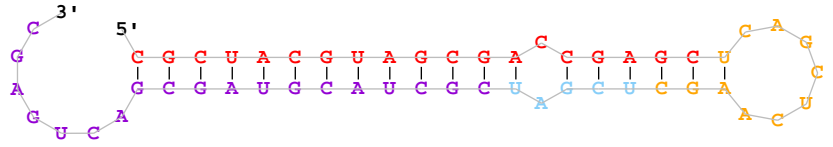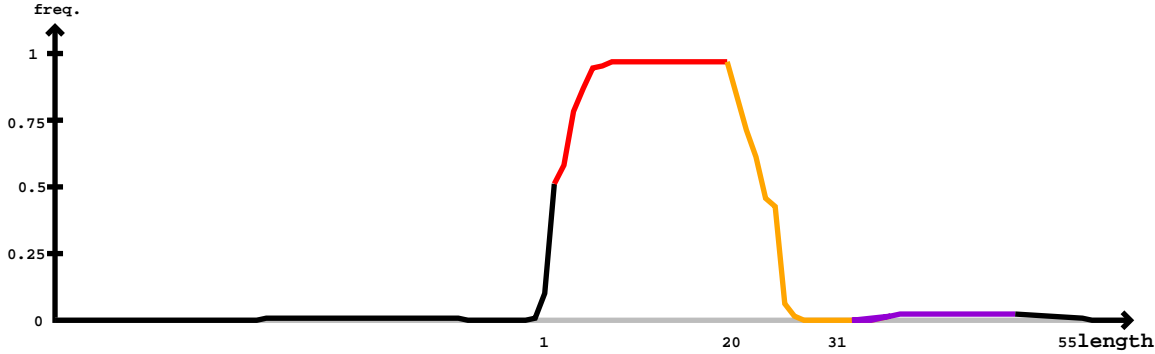

Mature
Star

| 5' -                                                  | obs | reads | mm | sample |
|-------------------------------------------------------|-----|-------|----|--------|
| uucgaguugcguuuuaggccucuuuggaccgagccgugugcgugcucguu    | -3' |       |    |        |
| uucgaguugcguuuuaggccucuuuggaccgagccgugugcgugcucguu    | exp |       |    |        |
| .....(((.....))).....(((.....))).....(((.....)))..... |     |       |    |        |
| .....ucuuuggaccgagccgugugU.....                       |     | 1     | 1  | S03    |
| .....uucgcuacguagcgaccgagc.....                       |     | 1     | 0  | S03    |
| .....ucgcuacguagcgaccgagc.....                        |     | 3     | 0  | S03    |
| .....ucgcuacguagcgaccgagcu.....                       |     | 2     | 0  | S03    |
| .....ucgcuacguagcgaccgagcuc.....                      |     | 2     | 0  | S03    |
| .....ucgcuacguagcgaccgagcucagU.....                   |     | 1     | 1  | S03    |
| .....cgcuacguagcgaccgagc.....                         |     | 17    | 0  | S03    |
| .....cgcuacguagcgCccgagcu.....                        |     | 1     | 1  | S03    |
| .....cgcuacguagcgaccgagcu.....                        |     | 2     | 0  | S03    |
| .....Ggcuacguagcgaccgagcuc.....                       |     | 1     | 1  | S03    |
| .....cgcuacguagcgaccgagcuc.....                       |     | 7     | 0  | S03    |
| .....cgcuacguagcgaccgagcuAa.....                      |     | 1     | 1  | S03    |
| .....cgcuacguagUgaccgagcuca.....                      |     | 1     | 1  | S03    |
| .....cgcuacguagcgaccgagcuca.....                      |     | 6     | 0  | S03    |
| .....cgcuacguagcgaccgagcucag.....                     |     | 1     | 0  | S03    |
| .....cgcuacguagcgaccgagcucagc.....                    |     | 7     | 0  | S03    |
| .....cgcuacguagcgaccgagcucagU.....                    |     | 2     | 1  | S03    |
| .....cgcuacguagcgaccgagcucagA.....                    |     | 1     | 1  | S03    |
| .....gcuacguagcgaccgagc.....                          |     | 1     | 0  | S03    |
| .....gcuacguagcgaccgagcuc.....                        |     | 1     | 0  | S03    |
| .....gcuacguagcgaccgagcuca.....                       |     | 3     | 0  | S03    |
| .....gcuacguagcgaccgagcucag.....                      |     | 2     | 0  | S03    |
| .....gcuacguagcgaccgagcucagc.....                     |     | 1     | 0  | S03    |
| .....cuacguagcgaccgagcu.....                          |     | 2     | 0  | S03    |
| .....cuacguagcgaccgagcuca.....                        |     | 5     | 0  | S03    |
| .....cuacguagcgaccgagcucagc.....                      |     | 10    | 0  | S03    |
| .....cuacguagcgaccgagcucagU.....                      |     | 4     | 1  | S03    |
| .....cuacguagcgaccgagcucagcu.....                     |     | 1     | 0  | S03    |
| .....uacguagcgacUgagcucagc.....                       |     | 1     | 1  | S03    |
| .....uacguagcgaccgagcucagc.....                       |     | 4     | 0  | S03    |
| .....uacguagcgaccgagcucagU.....                       |     | 1     | 1  | S03    |
| .....uacguagcgaccgagcucagcu.....                      |     | 1     | 0  | S03    |
| .....Cacguagcgaccgagcucagcu.....                      |     | 1     | 1  | S03    |

Mature

Star

|                                                    |                          |                 |                     |        |   |   |     |
|----------------------------------------------------|--------------------------|-----------------|---------------------|--------|---|---|-----|
| uucgaguugcguuuuaggccucuuuggaccgagccgugugcgugcucguu | cgcuacguagcgaccgagc      | ucagcucaagcugau | cgcuacguagcgacugagc | caugua |   |   |     |
| .....                                              | uacguagcgaccgagcucagcuU  | .....           | .....               | .....  | 1 | 1 | S03 |
| .....                                              | acguagcgaccgagAucagc     | .....           | .....               | .....  | 1 | 1 | S03 |
| .....                                              | acguagcgaccgagcucagc     | .....           | .....               | .....  | 5 | 0 | S03 |
| .....                                              | acguagcgaccgagcucagc     | .....           | .....               | .....  | 1 | 1 | S03 |
| .....                                              | acguagcgaccgagcucagcu    | .....           | .....               | .....  | 2 | 0 | S03 |
| .....                                              | cguagcgaccgagcucagc      | .....           | .....               | .....  | 1 | 0 | S03 |
| .....                                              | guagcgaccgagcucagA       | .....           | .....               | .....  | 1 | 1 | S03 |
| .....                                              | guagcgaccgagcucagcuc     | .....           | .....               | .....  | 1 | 0 | S03 |
| .....                                              | gcuacguagcgacugagc       | .....           | .....               | .....  | 1 | 0 | S03 |
| .....                                              | ucgcuacguagcgaccgagc     | .....           | .....               | .....  | 1 | 0 | S04 |
| .....                                              | ucgcuacguagcgaccgagcuc   | .....           | .....               | .....  | 1 | 0 | S04 |
| .....                                              | ucgcuacguagcgaccgagcucua | .....           | .....               | .....  | 1 | 0 | S04 |
| .....                                              | ucgcuacguagUgaccgagcucua | .....           | .....               | .....  | 1 | 1 | S04 |
| .....                                              | cgcuacguagcgaccgagc      | .....           | .....               | .....  | 1 | 0 | S04 |
| .....                                              | cgcuacguagcgaccgagcuc    | .....           | .....               | .....  | 1 | 0 | S04 |
| .....                                              | cgcuGcgugagcgaccgagcucua | .....           | .....               | .....  | 1 | 1 | S04 |
| .....                                              | cgcuacguagcgaccgagcucUg  | .....           | .....               | .....  | 1 | 1 | S04 |
| .....                                              | cgcuacguagcgaccgagcucagA | .....           | .....               | .....  | 1 | 1 | S04 |
| .....                                              | gcuacguagcgaccgagcucua   | .....           | .....               | .....  | 1 | 0 | S04 |
| .....                                              | cuaugcgaccgagcucagc      | .....           | .....               | .....  | 3 | 0 | S04 |
| .....                                              | cuaugcgaccgagcucagcu     | .....           | .....               | .....  | 1 | 0 | S04 |
| .....                                              | uacguagcgaccgagcuc       | .....           | .....               | .....  | 1 | 0 | S04 |
| .....                                              | uacguagcgaccgagcucagc    | .....           | .....               | .....  | 1 | 0 | S04 |
| .....                                              | acguagcgaccgagcucagc     | .....           | .....               | .....  | 1 | 0 | S04 |
| .....                                              | ucgcuacguagcgacugagccG   | .....           | .....               | .....  | 1 | 1 | S04 |
| .....                                              | cgcuacguagcgacugagc      | .....           | .....               | .....  | 1 | 0 | S04 |



Star

Mature

|                                                                                                                    |    |   |     |
|--------------------------------------------------------------------------------------------------------------------|----|---|-----|
| aagccauuugaauuuuuugaauuuuagguuuuuuccagaucugagacuggcuuugaagaagacuucuuagaagacucucggaagacuucagacaagucucuuaugcauuuuuug |    |   |     |
| .....ucucggaauuacuucuaagacaaguc.....                                                                               | 1  | 1 | S03 |
| .....cucggaauuacuucuaagaca.....                                                                                    | 2  | 1 | S03 |
| .....cucggaGgacuucuaagaca.....                                                                                     | 1  | 1 | S03 |
| .....cucggaauuacuucuaagacaagu.....                                                                                 | 6  | 1 | S03 |
| .....cucggaauuacuucuaagacaagucu.....                                                                               | 1  | 1 | S03 |
| .....acuucuaagacaagucucuuaaagc.....                                                                                | 1  | 0 | S03 |
| .....ucuagacaagucucuuaaagc.....                                                                                    | 1  | 0 | S03 |
| .....ucuagacaagucucuuaaagcauu.....                                                                                 | 1  | 0 | S03 |
| .....uagacaagucucuuaaagcauu.....                                                                                   | 1  | 0 | S03 |
| .....agacaagucucuuaaagcauuuu.....                                                                                  | 1  | 0 | S03 |
| .agccauuugaaCguuuuuugaa.....                                                                                       | 1  | 1 | S04 |
| .agccauuugaaCguuuuuugaau.....                                                                                      | 1  | 1 | S04 |
| .....aaauuguagguuuuccagaucuga.....                                                                                 | 1  | 0 | S04 |
| .....guagguuuuuuucagaucugagacug.....                                                                               | 1  | 1 | S04 |
| .....cugagacuggcuuugaagacuuc.....                                                                                  | 1  | 0 | S04 |
| .....agaagacucucggaagac.....                                                                                       | 1  | 0 | S04 |
| .....agaagacucucggaagacu.....                                                                                      | 1  | 0 | S04 |
| .....agaagacucucggaagacuucuaagaca.....                                                                             | 1  | 0 | S04 |
| .....gaagacucucggaauuacuucua.....                                                                                  | 1  | 1 | S04 |
| .....gaagacucucggaauuacuucuaag.....                                                                                | 1  | 1 | S04 |
| .....gaagacucucggaauuacuucuaaga.....                                                                               | 1  | 1 | S04 |
| .....gaagacucucggaagacuucuaagaca.....                                                                              | 1  | 0 | S04 |
| .....aagacucucggaagacuucu.....                                                                                     | 4  | 0 | S04 |
| .....aagacucucggaagacuucua.....                                                                                    | 2  | 0 | S04 |
| .....aagacucucggaagacuucuaagaG.....                                                                                | 1  | 1 | S04 |
| .....aagacucucggaagacuucuaagac.....                                                                                | 1  | 0 | S04 |
| .....aagacucucggaauuacuucuaagac.....                                                                               | 1  | 1 | S04 |
| .....aagacucucggaagacuucuaagaca.....                                                                               | 1  | 0 | S04 |
| .....agacucucggaagacuucua.....                                                                                     | 1  | 0 | S04 |
| .....agacucucggaagacuucuaag.....                                                                                   | 1  | 0 | S04 |
| .....agacucucgUaagacuucuaaga.....                                                                                  | 1  | 1 | S04 |
| .....agacucucggaagacuucuaaga.....                                                                                  | 1  | 0 | S04 |
| .....agacucucggaagacuucuaagac.....                                                                                 | 1  | 0 | S04 |
| .....agacucucggaagacuucUgac.....                                                                                   | 1  | 1 | S04 |
| .....agacucucgGagacuucuaagaca.....                                                                                 | 1  | 1 | S04 |
| .....agGcucucggaagacuucuaagaca.....                                                                                | 1  | 1 | S04 |
| .....aUacuucggaagacuucuaagaca.....                                                                                 | 1  | 1 | S04 |
| .....agacucucggaagacuucuaagacG.....                                                                                | 1  | 1 | S04 |
| .....agacucucggaauuacuucuaagaca.....                                                                               | 3  | 1 | S04 |
| .....agacucucggaagacuucuaagacU.....                                                                                | 1  | 1 | S04 |
| .....agacucucAgaagacuucuaagaca.....                                                                                | 1  | 1 | S04 |
| .....agacucucggaagacuucuaagaca.....                                                                                | 23 | 0 | S04 |
| .....agacucucggaagacuucuaaaca.....                                                                                 | 1  | 1 | S04 |
| .....gacucucggaagacuucu.....                                                                                       | 10 | 0 | S04 |
| .....gacucucggaagacuucua.....                                                                                      | 1  | 0 | S04 |
| .....gacucucggaagacuucuaagaca.....                                                                                 | 3  | 0 | S04 |
| .....gacucucggaagacuucCagacaa.....                                                                                 | 1  | 1 | S04 |
| .....acucucggaagacuucua.....                                                                                       | 2  | 0 | S04 |
| .....acucucggaagacuucuaagacG.....                                                                                  | 1  | 1 | S04 |
| .....acucucggaagacuucuaagaca.....                                                                                  | 15 | 0 | S04 |
| .....acucucggaagacuucuaagacU.....                                                                                  | 1  | 1 | S04 |
| .....acucucggaagacuucuaagacaa.....                                                                                 | 1  | 0 | S04 |
| .....acucucggaagacuucuaagacaag.....                                                                                | 8  | 0 | S04 |
| .....cucucggaagacuucuaagaca.....                                                                                   | 9  | 0 | S04 |
| .....cucucggaagacuucuaagacG.....                                                                                   | 1  | 1 | S04 |
| .....cucucggaagacuucuaagacaag.....                                                                                 | 2  | 0 | S04 |
| .....cucucggaauuacuucuaagacaagu.....                                                                               | 2  | 1 | S04 |
| .....cucucggaagacuucuaagacaagG.....                                                                                | 1  | 1 | S04 |
| .....cucucggaagacuucuaagacaagu.....                                                                                | 5  | 0 | S04 |
| .....ucucggaagacuucuaagaca.....                                                                                    | 1  | 0 | S04 |
| .....ucucggaagacuucuaagacU.....                                                                                    | 1  | 1 | S04 |
| .....ucucggaagacuucuaagacaagu.....                                                                                 | 1  | 0 | S04 |
| .....ucucggaagacuucuaagacaaAu.....                                                                                 | 1  | 1 | S04 |
| .....ucucggaagacuucuaagacaaguc.....                                                                                | 4  | 0 | S04 |
| .....ucucggaagacuucuaagacaagucA.....                                                                               | 1  | 1 | S04 |
| .....cucggaagacuucuaagaca.....                                                                                     | 3  | 0 | S04 |
| .....cucggaagacuucuaagacaagu.....                                                                                  | 5  | 0 | S04 |
| .....cucggaagacuucuaagacaaguA.....                                                                                 | 1  | 1 | S04 |
| .....cucggaagacuucuaagacaagucu.....                                                                                | 1  | 0 | S04 |

Star

Mature

|                                                                                                                |   |   |     |
|----------------------------------------------------------------------------------------------------------------|---|---|-----|
| aagccauuugaauguuuugaauuugagguuuuccagaucugagacuggcuuugaagaagacuucuaagaagacucggaagacuucuaagcaagcuucuaaugcauuuuug |   |   |     |
| .....ucggaagacuucuaagcaagC.....                                                                                | 1 | 1 | S04 |
| .....ucggaagacuucuaagcaagu.....                                                                                | 1 | 0 | S04 |
| .....cuagacaagcuucuaaugca.....                                                                                 | 1 | 0 | S04 |
| .....cuagacaagcuucuaaugcauu.....                                                                               | 1 | 0 | S04 |
| .....uagacaagcuucuaaugcauuuu.....                                                                              | 1 | 0 | S04 |
| .....agacaagcuucuaaugcauuuu.....                                                                               | 1 | 0 | S04 |
| .....acaagcuucuaaugcauuuuug                                                                                    | 1 | 0 | S04 |
| .....caagcuucuaaugcauuuu.....                                                                                  | 1 | 0 | S04 |



Provisional ID : chrC03\_1412233  
 Score total : 0.3  
 Score for star read(s) : 3.9  
 Score for read counts : -4.9  
 Score for mfe : 1.3  
 Score for randfold : 0  
 Score for cons. seed :  
 Total read count : 2  
 Mature read count : 1  
 Loop read count : 0  
 Star read count : 1

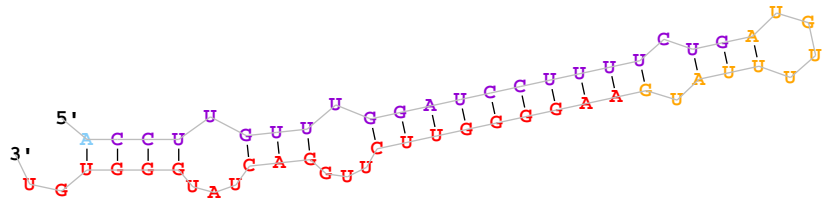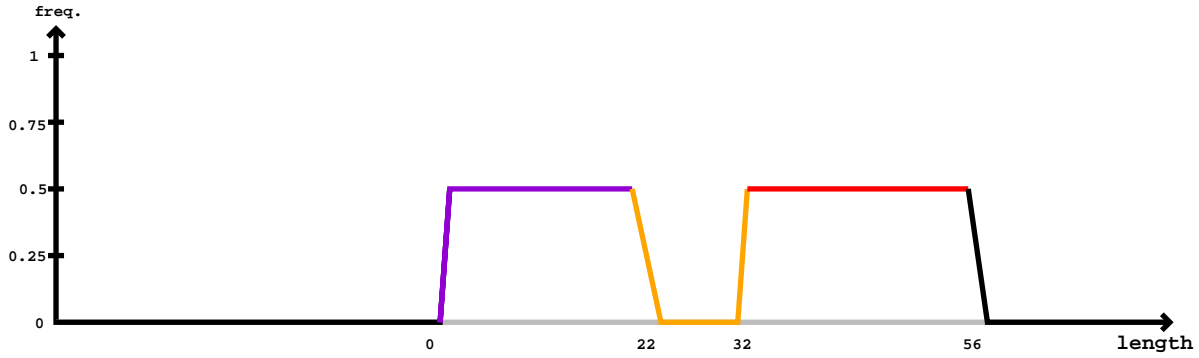

**Star**

**Mature**

|                                                                                                                                                                                                |                                                                                     |     |                                     |                                |
|------------------------------------------------------------------------------------------------------------------------------------------------------------------------------------------------|-------------------------------------------------------------------------------------|-----|-------------------------------------|--------------------------------|
| 5' - agcgacuaguucguucgcgaccggucgcuacgugguga<br>agcgacuaguucguucgcgaccggucgcuacguggug<br>((((((.....)))))).....(((.....)))<br>.....aagggguucuggacuugggugu.....<br>.....ccuuguuggauccuuucuA..... | <b>ccuuguuuuggauccuuucu</b><br><b>gauguuuuuuga</b><br><b>aagggguucuggacuugggugu</b> | -3' | obs<br>exp<br>reads<br>mm<br>sample | 1<br>0<br>1<br>1<br>S03<br>S04 |
|------------------------------------------------------------------------------------------------------------------------------------------------------------------------------------------------|-------------------------------------------------------------------------------------|-----|-------------------------------------|--------------------------------|



Provisional ID : chrC03\_1419065  
 Score total : 0  
 Score for star read(s) : 3.9  
 Score for read counts : -4.9  
 Score for mfe : 1  
 Score for randfold : 0  
 Score for cons. seed :  
 Total read count : 2  
 Mature read count : 1  
 Loop read count : 0  
 Star read count : 1

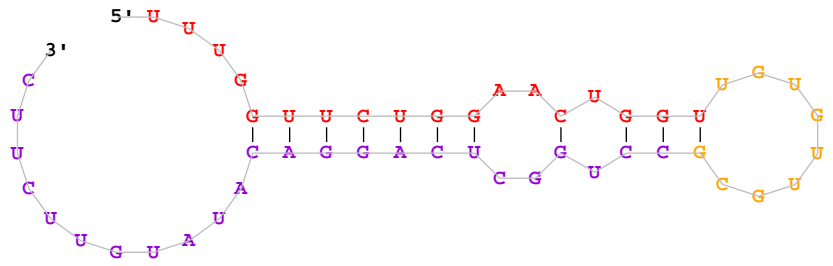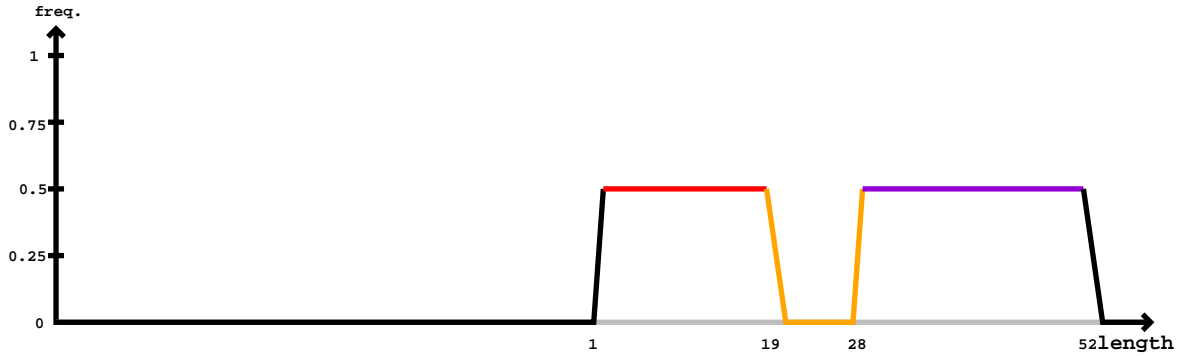

Mature                      Star

|                                                                                                                                                                                                                                                                                                                                                                                                                                                                                                                                           |                   |         |               |
|-------------------------------------------------------------------------------------------------------------------------------------------------------------------------------------------------------------------------------------------------------------------------------------------------------------------------------------------------------------------------------------------------------------------------------------------------------------------------------------------------------------------------------------------|-------------------|---------|---------------|
| 5' - ucguc <u>u</u> gggagcag <u>u</u> gu <u>g</u> gcgaaggagcgguuucucagcagucugc <u>u</u> uu <u>g</u> guucug <u>g</u> aacug <u>g</u> uug <u>u</u> gug <u>g</u> cg <u>g</u> ccuggcucaggacauauguuc <u>u</u> uc <u>u</u> uggu -3'<br>ucguc <u>u</u> gggagcag <u>u</u> gu <u>g</u> gcgaaggagcgguuucucagcagucugc <u>u</u> uu <u>g</u> guucug <u>g</u> aacug <u>g</u> uug <u>u</u> gug <u>g</u> cg <u>g</u> ccuggcucaggacauauguuc <u>u</u> uc <u>u</u> uggu<br>.....(.....(((.....))).....)).....(((.....))).....<br>.....Guugguucuggaacuggu..... | exp<br>reads<br>1 | mm<br>1 | sample<br>S03 |
| .....cUuggcucaggacauauguuc <u>u</u> uc.....                                                                                                                                                                                                                                                                                                                                                                                                                                                                                               | reads<br>1        | mm<br>1 | sample<br>S04 |

Provisional ID : chrC03\_1421586  
 Score total : 16.9  
 Score for star read(s) : 3.9  
 Score for read counts : 13.9  
 Score for mfe : -0.8  
 Score for randfold : 0  
 Score for cons. seed :  
 Total read count : 39  
 Mature read count : 36  
 Loop read count : 0  
 Star read count : 3

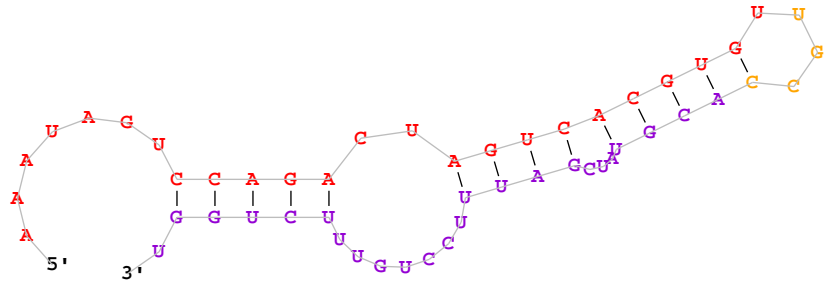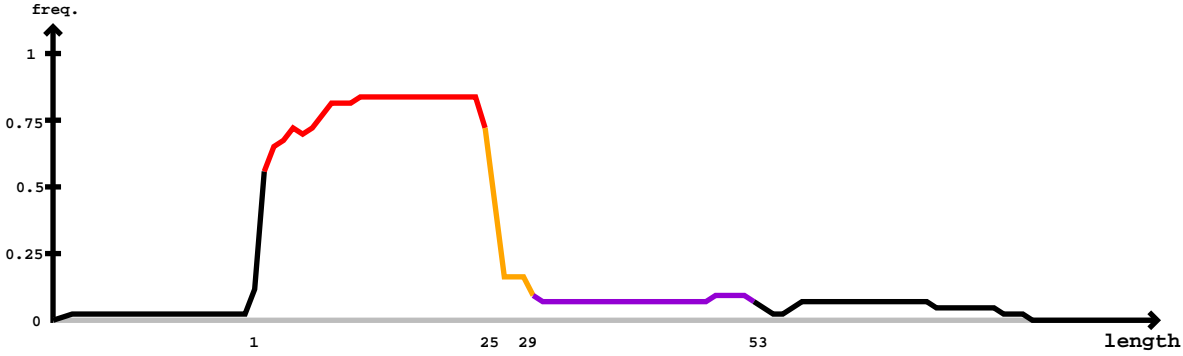

**Mature** **Star**

| 5' -                                                                                                            | reads | mm | sample |
|-----------------------------------------------------------------------------------------------------------------|-------|----|--------|
| aggauauucuggccccacugaaauaguccagacuagucacgugugccacguaucgauuuuccuguuuucuggugacgccgaaauguaauuuccagugaccgagaucaaauc | 1     | 0  | S03    |
| aggauauucuggccccacugaaauaguccagacuagucacgugugccacguaucgauuuuccuguuuucuggugacgccgaaauguaauuuccagugaccgagaucaaauc | 4     | 0  | S03    |
| .....gaaauaguccagacuagucacgug.....                                                                              | 1     | 1  | S03    |
| .....aaauaguccagacuagucacgug.....                                                                               | 1     | 0  | S03    |
| .....Naauaguccagacuagucacgug.....                                                                               | 1     | 1  | S03    |
| .....auaguccagacuagucacguguu.....                                                                               | 1     | 0  | S03    |
| .....Aaguccagacuagucacguguugc.....                                                                              | 1     | 1  | S03    |
| .....uccagacuagucacguguugcA.....                                                                                | 1     | 1  | S03    |
| .....ccagacuagucacguguugcA.....                                                                                 | 1     | 1  | S03    |
| .....gacuagucacguguugcA.....                                                                                    | 1     | 1  | S03    |
| .....acguaucgauuuuccuguuuucuggC.....                                                                            | 1     | 1  | S03    |
| .....cugggacgccgaaauguaauu.....                                                                                 | 1     | 0  | S03    |
| .....ccgaaauguaauuuccagugc.....                                                                                 | 1     | 0  | S03    |
| aggauauucuggccccacugaaau.....                                                                                   | 1     | 0  | S04    |
| .....gaaauaguccGgacuagucacgug.....                                                                              | 1     | 1  | S04    |
| .....gaaauaguccagacuagucacgug.....                                                                              | 2     | 0  | S04    |
| .....aaauaguccagacuagucacgugA.....                                                                              | 4     | 1  | S04    |
| .....aUauaguccagacuagucacgugu.....                                                                              | 1     | 1  | S04    |
| .....aaauaguccagacuagucacgugC.....                                                                              | 2     | 1  | S04    |
| .....aaauaguccagacuagucacgugu.....                                                                              | 7     | 0  | S04    |
| .....aaauaguccagacuagucacgug.....                                                                               | 1     | 0  | S04    |
| .....aaauaguccagacuagucacgugu.....                                                                              | 1     | 0  | S04    |
| .....aaauaguccagacuagucacguguu.....                                                                             | 1     | 0  | S04    |
| .....aaauaguccagacuagucacguguG.....                                                                             | 1     | 1  | S04    |
| .....uaguccagacuagucacguguu.....                                                                                | 1     | 0  | S04    |
| .....guccagacuagucacguguugcA.....                                                                               | 1     | 1  | S04    |
| .....uccagacuagucacguguugccG.....                                                                               | 1     | 1  | S04    |
| .....ccagacuagucUcguguugcc.....                                                                                 | 1     | 1  | S04    |
| .....cacgGaucgauuuuccuguuuucugg.....                                                                            | 1     | 1  | S04    |
| .....acguaucgauuuuccuguuuucuggu.....                                                                            | 1     | 0  | S04    |
| .....gccgaaauguaauuuccagug.....                                                                                 | 1     | 0  | S04    |



Provisional ID : chrC03\_1460011  
 Score total : 0.1  
 Score for star read(s) : -1.3  
 Score for read counts : 0  
 Score for mfe : 1.4  
 Score for randfold : 0  
 Score for cons. seed :  
 Total read count : 15  
 Mature read count : 15  
 Loop read count : 0  
 Star read count : 0

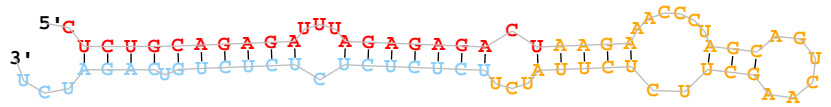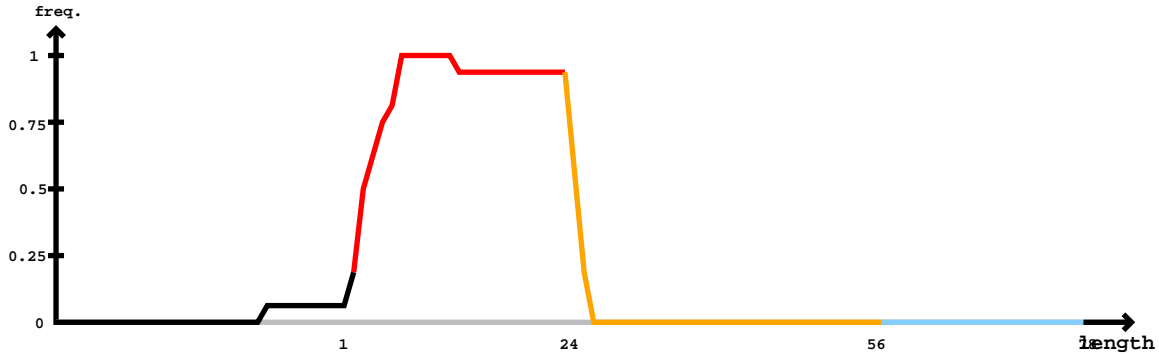

**Mature**

**Star**

| 5'                                                                                                             | 3' | exp | reads | mm | sample |
|----------------------------------------------------------------------------------------------------------------|----|-----|-------|----|--------|
| uuucucuauuucugagaucaaaaacggagcucugcagagagauuuagagagacuaagaaaaccuagcagucuaagcuucucuuauucucucucucucugucagauucuuu |    |     |       |    |        |
| .....aaaacggagcucugcagaga.....                                                                                 |    |     | 1     | 0  | S03    |
| .....ucugcagagauuuagagagacC.....                                                                               |    |     | 1     | 1  | S03    |
| .....ucugcagagauuuagagagacuG.....                                                                              |    |     | 1     | 1  | S03    |
| .....cugcagagauuuagagagacu.....                                                                                |    |     | 1     | 0  | S03    |
| .....ugcagagauuuagagagacuaa.....                                                                               |    |     | 1     | 0  | S03    |
| .....gcagagauuuagagagacu.....                                                                                  |    |     | 1     | 0  | S03    |
| .....cagagauuuagagagacu.....                                                                                   |    |     | 1     | 0  | S03    |
| .....cucugcagagauuuagagagacu.....                                                                              |    |     | 2     | 0  | S04    |
| .....ucugcagagauuuagagagacu.....                                                                               |    |     | 1     | 0  | S04    |
| .....ucugcagagauuuAagagacua.....                                                                               |    |     | 1     | 1  | S04    |
| .....ucugcagagauuuGgagagacuaa.....                                                                             |    |     | 1     | 1  | S04    |
| .....cugcagagauuuagagagacu.....                                                                                |    |     | 1     | 0  | S04    |
| .....ugcagagauuuagagagacuaC.....                                                                               |    |     | 1     | 1  | S04    |
| .....cagagauuuagagagacu.....                                                                                   |    |     | 2     | 0  | S04    |



Star

Mature

|                                                                                                                  |     |   |     |
|------------------------------------------------------------------------------------------------------------------|-----|---|-----|
| guguacugaaacacauaucagcacgcuggcccuuccuaugaacugucgugggugauuuuggcccacgugggcugucuguuacaguacacauaucagcaugcuggcccuuccg |     |   |     |
| .....ccacgugggcugucuguuacaguacU.....                                                                             | 1   | 1 | S03 |
| .....cacgugggcugucCguuca.....                                                                                    | 1   | 1 | S03 |
| .....cacgugggcugucuguuacG.....                                                                                   | 1   | 1 | S03 |
| .....cacgugggcugucuguuac.....                                                                                    | 4   | 0 | S03 |
| .....cacgugggcugucuguuacag.....                                                                                  | 5   | 0 | S03 |
| .....cacgugggcugucuguuacagu.....                                                                                 | 21  | 0 | S03 |
| .....cacgugggcugucuguuacagC.....                                                                                 | 2   | 1 | S03 |
| .....cacgugggcugucCguuacagu.....                                                                                 | 1   | 1 | S03 |
| .....cacgugggcugucuguuacagCa.....                                                                                | 2   | 1 | S03 |
| .....cacgugggcugucuguuacagua.....                                                                                | 20  | 0 | S03 |
| .....cacgugggcugucCguuacagua.....                                                                                | 1   | 1 | S03 |
| .....cacgugggcugucuguuacaguac.....                                                                               | 24  | 0 | S03 |
| .....cacgugggcugucuguuacaguaca.....                                                                              | 3   | 0 | S03 |
| .....acgugggcugucuguuac.....                                                                                     | 2   | 0 | S03 |
| .....acgugggcugucuguuacagu.....                                                                                  | 8   | 0 | S03 |
| .....acgugggcugucuguuacagC.....                                                                                  | 1   | 1 | S03 |
| .....acgugggcugucuguuacagua.....                                                                                 | 19  | 0 | S03 |
| .....acgugggcugucCguuacagua.....                                                                                 | 1   | 1 | S03 |
| .....acgugggcuUucuguuacagua.....                                                                                 | 1   | 1 | S03 |
| .....acgugggcugucuguuacCgua.....                                                                                 | 1   | 1 | S03 |
| .....acgugCgcugucuguuacaguac.....                                                                                | 1   | 1 | S03 |
| .....Ncgugggcugucuguuacaguac.....                                                                                | 1   | 1 | S03 |
| .....acgugggcugucCguuacaguac.....                                                                                | 1   | 1 | S03 |
| .....acgugggcugucuguuacaguCc.....                                                                                | 1   | 1 | S03 |
| .....acgAgggcugucuguuacaguac.....                                                                                | 1   | 1 | S03 |
| .....acgugggcugucuguuacGguac.....                                                                                | 3   | 1 | S03 |
| .....acgugggcugucuguuacaguacG.....                                                                               | 1   | 1 | S03 |
| .....acgugggcugucuguuacaguac.....                                                                                | 185 | 0 | S03 |
| .....acgugggcuUucuguuacaguac.....                                                                                | 1   | 1 | S03 |
| .....acgugggcuCucuguuacaguac.....                                                                                | 3   | 1 | S03 |
| .....acgugggcugucuguuacaguaca.....                                                                               | 17  | 0 | S03 |
| .....acgugggcugucuguuacaguacU.....                                                                               | 2   | 1 | S03 |
| .....acgugggcugucuguuacGguaca.....                                                                               | 1   | 1 | S03 |
| .....acgugggcuCucuguuacaguacac.....                                                                              | 1   | 1 | S03 |
| .....cgugggcugucuguuacagu.....                                                                                   | 8   | 0 | S03 |
| .....cgugggcugCcuuacaguac.....                                                                                   | 1   | 1 | S03 |
| .....cgugggcugucuguuacaguac.....                                                                                 | 3   | 0 | S03 |
| .....cgugggcugucuguuacaguac.....                                                                                 | 14  | 0 | S03 |
| .....cgugggcuUucuguuacaguaca.....                                                                                | 1   | 1 | S03 |
| .....cgugggcugucuguuacaguaca.....                                                                                | 11  | 0 | S03 |
| .....cgugggcugucuguuacCguacaca.....                                                                              | 1   | 1 | S03 |
| .....cgugggcugucuguuacaguacaca.....                                                                              | 1   | 0 | S03 |
| .....gugggcugucuguuacagu.....                                                                                    | 1   | 0 | S03 |
| .....gugggcugucuguuacaguac.....                                                                                  | 2   | 0 | S03 |
| .....gugggcugucuguuacaguac.....                                                                                  | 1   | 0 | S03 |
| .....gugggcugucuguuacaguacU.....                                                                                 | 1   | 1 | S03 |
| .....gugggcuCucuguuacaguaca.....                                                                                 | 1   | 1 | S03 |
| .....gugggcugucuguuacaguaca.....                                                                                 | 6   | 0 | S03 |
| .....gugggcugucuguuacaguacaG.....                                                                                | 1   | 1 | S03 |
| .....gugggcugucuguuacCguacaca.....                                                                               | 1   | 1 | S03 |
| .....gugggcuUucuguuacaguacaca.....                                                                               | 1   | 1 | S03 |
| .....gugggcugucuguuacAuacacau.....                                                                               | 1   | 1 | S03 |
| .....ugggcugucuguuacaguac.....                                                                                   | 3   | 0 | S03 |
| .....ugggcugucuguuacaguaca.....                                                                                  | 2   | 0 | S03 |
| .....ugggcugucuguuacaguacaca.....                                                                                | 1   | 0 | S03 |
| .....ugggcuCucuguuacaguacaca.....                                                                                | 1   | 1 | S03 |
| .....acacauaucagcaugcuggccU.....                                                                                 | 1   | 1 | S03 |
| .....acacauaucagcaugcuggccuu.....                                                                                | 1   | 0 | S03 |
| .....cacauaucagcaugcuggccuu.....                                                                                 | 1   | 0 | S03 |
| .....cacauaucagcaugcuggccuuA.....                                                                                | 1   | 1 | S03 |
| .....auaucagcaugcuggccuuuccg.....                                                                                | 1   | 0 | S03 |
| .....cacauaucagcacgcuggccu.....                                                                                  | 1   | 0 | S04 |
| .....acauaucagcacAcuggccuucc.....                                                                                | 1   | 1 | S04 |
| .....ucagcacgcuggccuucc.....                                                                                     | 1   | 0 | S04 |
| .....cagcacgcuggccAuuccu.....                                                                                    | 1   | 1 | S04 |
| .....cacgcuggccuuccuaugaacu.....                                                                                 | 1   | 0 | S04 |
| .....uguccgugggugauuuuggc.....                                                                                   | 1   | 0 | S04 |
| .....uggCugauuuuggccacgug.....                                                                                   | 1   | 1 | S04 |
| .....ggugauuuuggccacgug.....                                                                                     | 1   | 0 | S04 |



Star

Mature

guguacugaaacacauaucagcacgcugggcccuuccuaugaacugucgugggugauuuuggcccacgugggcugucuguuacagAACacacauaucagcaugcggcccuuccgu

|                                      |    |   |     |
|--------------------------------------|----|---|-----|
| .....ggugauuGuggcccacgugggc.....     | 1  | 1 | S04 |
| .....gugauuuuggcccacgugggcu.....     | 1  | 0 | S04 |
| .....gugauuuuggcccacguCggcug.....    | 1  | 1 | S04 |
| .....ugauuuuggAACcagugggc.....       | 1  | 1 | S04 |
| .....ugauuuuggcccacgugggcu.....      | 1  | 0 | S04 |
| .....ugauuuuggcccacguCggcug.....     | 2  | 1 | S04 |
| .....uuuuggAACcagugggcugucu.....     | 1  | 1 | S04 |
| .....uuuuggcccacgugggcugucug.....    | 1  | 0 | S04 |
| .....uuuuggcccacgugggcugucugu.....   | 1  | 0 | S04 |
| .....uuuuggAACcagugggcugucugu.....   | 1  | 1 | S04 |
| .....uuggcccacgugggcugucuguGc.....   | 1  | 1 | S04 |
| .....uuggcccacgugggcugucuguuuc.....  | 2  | 0 | S04 |
| .....uuggcccacgugggcugucuguAAC.....  | 1  | 1 | S04 |
| .....uggcccacgugggcugucuguuuc.....   | 3  | 0 | S04 |
| .....uggcccacgugggcugucuguuucC.....  | 1  | 1 | S04 |
| .....ggcccacgugggcugucuguuuc.....    | 1  | 0 | S04 |
| .....ggcccacgugCgcugucuguuuc.....    | 1  | 1 | S04 |
| .....gcccacgugggcugucugu.....        | 1  | 0 | S04 |
| .....gcccacgugggcugucuguu.....       | 1  | 0 | S04 |
| .....gcccacgugggcugucuguuuc.....     | 3  | 0 | S04 |
| .....gcccacgugggcugucuguuuc.....     | 2  | 0 | S04 |
| .....gcccacgugggcugucuguuucC.....    | 2  | 1 | S04 |
| .....gAACcagugggcugucuguuucag.....   | 1  | 1 | S04 |
| .....gcccacgugggcugucuguuucagu.....  | 3  | 0 | S04 |
| .....cccacgugggcucucugu.....         | 2  | 1 | S04 |
| .....cccacgugggcugucugu.....         | 3  | 0 | S04 |
| .....cccacgugggcugucuguu.....        | 10 | 0 | S04 |
| .....cccacgugggcugucuguG.....        | 1  | 1 | S04 |
| .....cccacgugggcugucuguCc.....       | 2  | 1 | S04 |
| .....cccacgugggcugucuguuuc.....      | 15 | 0 | S04 |
| .....cccacgugggcugucuguuuc.....      | 66 | 0 | S04 |
| .....cccacgugggcucucuguuuc.....      | 1  | 1 | S04 |
| .....cccacgugCgcugucuguuuc.....      | 1  | 1 | S04 |
| .....cccacgugggcugucuguuucC.....     | 3  | 1 | S04 |
| .....cccacgugggcucucuguuuc.....      | 1  | 1 | S04 |
| .....cccacgugggcugucuguuucG.....     | 2  | 1 | S04 |
| .....cccacgugggcucucuguuucag.....    | 1  | 1 | S04 |
| .....cccacgugggcugucuguuucag.....    | 1  | 0 | S04 |
| .....cccacgugggcucucuguuucag.....    | 1  | 1 | S04 |
| .....cccacgugggcugucuguuucagu.....   | 1  | 0 | S04 |
| .....cccacgugggcugucuguuucaguac..... | 1  | 0 | S04 |
| .....ccacgugggcugucuguu.....         | 8  | 0 | S04 |
| .....ccacgugggcugucuguG.....         | 1  | 1 | S04 |
| .....ccacgugggcugucuguGc.....        | 1  | 1 | S04 |
| .....ccacgugggcugucuguuuc.....       | 6  | 0 | S04 |
| .....ccacgugggcugucuguAAC.....       | 1  | 1 | S04 |
| .....ccacgugggcucucuguuuc.....       | 1  | 1 | S04 |
| .....ccacgugggcucucuguuuc.....       | 1  | 1 | S04 |
| .....ccacgugggcugucuguuucC.....      | 2  | 1 | S04 |
| .....ccacgugggcugucuguAAC.....       | 1  | 1 | S04 |
| .....ccacgugggcugCcuguuuc.....       | 1  | 1 | S04 |
| .....ccacgugggcugucuguuuc.....       | 57 | 0 | S04 |
| .....ccacgugggcugucuguuucG.....      | 4  | 1 | S04 |
| .....ccacgugggcucucuguuuc.....       | 1  | 1 | S04 |
| .....ccacgugggcucucuguuucag.....     | 3  | 1 | S04 |
| .....ccacgugggcugucuguuucag.....     | 10 | 0 | S04 |
| .....ccacgugggcugucGguuucagu.....    | 1  | 1 | S04 |
| .....ccacgugggcugucuguuucagC.....    | 9  | 1 | S04 |
| .....ccacgugggcugucuguuucagu.....    | 83 | 0 | S04 |
| .....ccacCugggcugucuguuucagu.....    | 1  | 1 | S04 |
| .....ccacgugggcucucuguuucagu.....    | 1  | 1 | S04 |
| .....ccacgugggcucucuguuucagu.....    | 5  | 1 | S04 |
| .....ccacgugggcugucuguCcagu.....     | 1  | 1 | S04 |
| .....ccacgugggcugucuguuucagu.....    | 1  | 1 | S04 |
| .....ccacgugggcugucuguuucCgu.....    | 1  | 1 | S04 |
| .....ccacgugggcugucuguuucGgu.....    | 1  | 1 | S04 |
| .....ccacgugggcugucuguuucagua.....   | 21 | 0 | S04 |
| .....ccacgugggcucucuguuucagua.....   | 1  | 1 | S04 |

Star

Mature

guguacugaaacacauaucagcacgcuggccuuuccuaugaacugucgugggugauuuuggcccacgugggcugucuguuacaguacacauaucagcaugcuggcccuucccg

|                                      |     |   |     |
|--------------------------------------|-----|---|-----|
| .....ccacgugggcUucuguuacagua.....    | 1   | 1 | S04 |
| .....ccacgugggcugucuguuacagCa.....   | 1   | 1 | S04 |
| .....ccacgugggcugucuguuacagUC.....   | 3   | 1 | S04 |
| .....ccaGugggcugucuguuacaguac.....   | 1   | 1 | S04 |
| .....ccacgugggcugucuguuacCguac.....  | 1   | 1 | S04 |
| .....cUacgugggcugucuguuacaguac.....  | 3   | 1 | S04 |
| .....ccacgAgggcugucuguuacaguac.....  | 1   | 1 | S04 |
| .....ccacgugggcugucuguuacaguac.....  | 66  | 0 | S04 |
| .....ccacgugggcUucuguuacaguac.....   | 1   | 1 | S04 |
| .....ccacgugggcugucuguuacaguaca..... | 1   | 0 | S04 |
| .....ccacgugggcugucuguuacaguacU..... | 1   | 1 | S04 |
| .....cagugggcugucuguuuc.....         | 4   | 0 | S04 |
| .....cagugggcugucCguuc.....          | 2   | 1 | S04 |
| .....cagugggcUcucuguuuc.....         | 1   | 1 | S04 |
| .....cagugggcUcucuguuucA.....        | 3   | 1 | S04 |
| .....cagugggcugucuguuucC.....        | 1   | 1 | S04 |
| .....cagugggcugucuguuucG.....        | 2   | 1 | S04 |
| .....cagugggcugucuguuucA.....        | 25  | 0 | S04 |
| .....cagugggcUucuguuucA.....         | 1   | 1 | S04 |
| .....cagugggcugucuguuucGg.....       | 1   | 1 | S04 |
| .....cagugggcugucuguuucag.....       | 19  | 0 | S04 |
| .....cagugggcUcucuguuucag.....       | 2   | 1 | S04 |
| .....cagugggcugucuguuucagC.....      | 11  | 1 | S04 |
| .....cagugggcugucCguuucagu.....      | 2   | 1 | S04 |
| .....cagugggcugCcuguuucagu.....      | 1   | 1 | S04 |
| .....cagugggcUcucuguuucagu.....      | 5   | 1 | S04 |
| .....cagugggcugucuguuucGgu.....      | 1   | 1 | S04 |
| .....cagugggcugucuguuucagu.....      | 75  | 0 | S04 |
| .....cagugggcugucuguGcagua.....      | 1   | 1 | S04 |
| .....cagugggcUcucuguuucagua.....     | 1   | 1 | S04 |
| .....cagugggcUucuguuucagua.....      | 1   | 1 | S04 |
| .....cacgAgggcugucuguuucagua.....    | 1   | 1 | S04 |
| .....cacgugCgucuguuucagua.....       | 1   | 1 | S04 |
| .....cacgugggcugucuguAcagua.....     | 1   | 1 | S04 |
| .....cacgugggcugucuguuucagCa.....    | 3   | 1 | S04 |
| .....cacgugggcugucuguuucagUC.....    | 4   | 1 | S04 |
| .....cacgugggcugucuguuucGgua.....    | 1   | 1 | S04 |
| .....cacgugggcugucuguuucagua.....    | 113 | 0 | S04 |
| .....cacgugggcugCcuguuucagua.....    | 1   | 1 | S04 |
| .....Nacgugggcugucuguuucagua.....    | 1   | 1 | S04 |
| .....cacgugggcUcucuguuucaguac.....   | 2   | 1 | S04 |
| .....cacgugggcugucuguuucGguac.....   | 1   | 1 | S04 |
| .....Uacgugggcugucuguuucaguac.....   | 7   | 1 | S04 |
| .....cacgugggcugucCguuucaguac.....   | 1   | 1 | S04 |
| .....cacgugggcugucuguuucCguac.....   | 1   | 1 | S04 |
| .....cacgugggcugucuguuucaguac.....   | 92  | 0 | S04 |
| .....cacgugggcugucCguuucaguaca.....  | 1   | 1 | S04 |
| .....cacgugggcugucuguuucaguaca.....  | 24  | 0 | S04 |
| .....cacgugggcugCcuguuucaguaca.....  | 1   | 1 | S04 |
| .....cacgugggcugucuguGcaguaca.....   | 1   | 1 | S04 |
| .....cacgugggcugucuguuucagCaca.....  | 2   | 1 | S04 |
| .....cacgugggcUcucuguuucaguaca.....  | 1   | 1 | S04 |
| .....cacgugggcugucuguuucaguacU.....  | 1   | 1 | S04 |
| .....acgAgggcugucuguuucA.....        | 1   | 1 | S04 |
| .....acgugggcugucuguuucC.....        | 1   | 1 | S04 |
| .....acgugggcugucuguuucG.....        | 1   | 1 | S04 |
| .....acgugggcugucuguuucA.....        | 9   | 0 | S04 |
| .....acgugggcugucCguuucag.....       | 1   | 1 | S04 |
| .....acgugggcugucuguuucag.....       | 3   | 0 | S04 |
| .....acgugggcugucuguuucagu.....      | 69  | 0 | S04 |
| .....acgugggcugucuguuucagC.....      | 5   | 1 | S04 |
| .....acgugggcugucuguuucagCa.....     | 1   | 1 | S04 |
| .....acgugggcUucuguuucaguac.....     | 2   | 1 | S04 |
| .....acgugggcugucuguuucGgua.....     | 1   | 1 | S04 |
| .....acgugggcugucuguuucaguac.....    | 76  | 0 | S04 |
| .....acgugCgucuguuucaguac.....       | 1   | 1 | S04 |
| .....acgugggcugucuguuucaguC.....     | 4   | 1 | S04 |
| .....acgugggcugucuguAacaguac.....    | 1   | 1 | S04 |
| .....acgAgggcugucuguuucaguac.....    | 4   | 1 | S04 |
| .....acgugggcugucuguCcaguac.....     | 1   | 1 | S04 |

Star

Mature

|                                                                   |                         |       |       |       |
|-------------------------------------------------------------------|-------------------------|-------|-------|-------|
| guguacugaaacacauaucagcacgcuggccuuuccuaugaaacugucgugggugauuuuggccc | acgugggcucucuguuacaguac | 8     | 1     | S04   |
| .....                                                             | .....                   | ..... | ..... | ..... |
| .....                                                             | .....                   | 1165  | 0     | S04   |
| .....                                                             | .....                   | 2     | 1     | S04   |
| .....                                                             | .....                   | 1     | 1     | S04   |
| .....                                                             | .....                   | 6     | 1     | S04   |
| .....                                                             | .....                   | 7     | 1     | S04   |
| .....                                                             | .....                   | 5     | 1     | S04   |
| .....                                                             | .....                   | 3     | 1     | S04   |
| .....                                                             | .....                   | 4     | 1     | S04   |
| .....                                                             | .....                   | 4     | 1     | S04   |
| .....                                                             | .....                   | 1     | 1     | S04   |
| .....                                                             | .....                   | 2     | 1     | S04   |
| .....                                                             | .....                   | 75    | 0     | S04   |
| .....                                                             | .....                   | 1     | 1     | S04   |
| .....                                                             | .....                   | 9     | 1     | S04   |
| .....                                                             | .....                   | 2     | 1     | S04   |
| .....                                                             | .....                   | 4     | 1     | S04   |
| .....                                                             | .....                   | 1     | 1     | S04   |
| .....                                                             | .....                   | 1     | 1     | S04   |
| .....                                                             | .....                   | 2     | 0     | S04   |
| .....                                                             | .....                   | 1     | 1     | S04   |
| .....                                                             | .....                   | 3     | 1     | S04   |
| .....                                                             | .....                   | 20    | 0     | S04   |
| .....                                                             | .....                   | 19    | 0     | S04   |
| .....                                                             | .....                   | 3     | 1     | S04   |
| .....                                                             | .....                   | 1     | 1     | S04   |
| .....                                                             | .....                   | 1     | 1     | S04   |
| .....                                                             | .....                   | 2     | 1     | S04   |
| .....                                                             | .....                   | 102   | 0     | S04   |
| .....                                                             | .....                   | 1     | 1     | S04   |
| .....                                                             | .....                   | 3     | 1     | S04   |
| .....                                                             | .....                   | 3     | 1     | S04   |
| .....                                                             | .....                   | 1     | 1     | S04   |
| .....                                                             | .....                   | 3     | 1     | S04   |
| .....                                                             | .....                   | 6     | 1     | S04   |
| .....                                                             | .....                   | 132   | 0     | S04   |
| .....                                                             | .....                   | 2     | 1     | S04   |
| .....                                                             | .....                   | 8     | 1     | S04   |
| .....                                                             | .....                   | 2     | 1     | S04   |
| .....                                                             | .....                   | 1     | 1     | S04   |
| .....                                                             | .....                   | 1     | 0     | S04   |
| .....                                                             | .....                   | 1     | 1     | S04   |
| .....                                                             | .....                   | 1     | 1     | S04   |
| .....                                                             | .....                   | 9     | 0     | S04   |
| .....                                                             | .....                   | 10    | 0     | S04   |
| .....                                                             | .....                   | 1     | 1     | S04   |
| .....                                                             | .....                   | 11    | 0     | S04   |
| .....                                                             | .....                   | 1     | 1     | S04   |
| .....                                                             | .....                   | 2     | 1     | S04   |
| .....                                                             | .....                   | 32    | 0     | S04   |
| .....                                                             | .....                   | 1     | 1     | S04   |
| .....                                                             | .....                   | 2     | 1     | S04   |
| .....                                                             | .....                   | 1     | 0     | S04   |
| .....                                                             | .....                   | 2     | 1     | S04   |
| .....                                                             | .....                   | 2     | 0     | S04   |
| .....                                                             | .....                   | 6     | 0     | S04   |
| .....                                                             | .....                   | 1     | 1     | S04   |
| .....                                                             | .....                   | 2     | 1     | S04   |
| .....                                                             | .....                   | 7     | 0     | S04   |
| .....                                                             | .....                   | 10    | 0     | S04   |
| .....                                                             | .....                   | 15    | 0     | S04   |
| .....                                                             | .....                   | 1     | 1     | S04   |
| .....                                                             | .....                   | 2     | 0     | S04   |
| .....                                                             | .....                   | 1     | 1     | S04   |
| .....                                                             | .....                   | 1     | 1     | S04   |
| .....                                                             | .....                   | 1     | 0     | S04   |
| .....                                                             | .....                   | 1     | 0     | S04   |
| .....                                                             | .....                   | 1     | 0     | S04   |

Star

Mature

|            |             |             |          |            |         |        |          |          |       |                 |         |       |   |   |     |
|------------|-------------|-------------|----------|------------|---------|--------|----------|----------|-------|-----------------|---------|-------|---|---|-----|
| guguacugaa | cacauaucagc | acgcuggcccu | ccuaugaa | cugucguggg | gugauuu | uggccc | acgugggc | ugucuguu | cagua | cacauaucagcaugc | uggcccu | cccgu |   |   |     |
| .....      | .....       | .....       | .....    | .....      | .....   | .....  | .....    | .....    | ..... | .....           | .....   | ..... | 1 | 0 | S04 |
| .....      | .....       | .....       | .....    | .....      | .....   | .....  | .....    | .....    | ..... | .....           | .....   | ..... | 1 | 0 | S04 |
| .....      | .....       | .....       | .....    | .....      | .....   | .....  | .....    | .....    | ..... | .....           | .....   | ..... | 1 | 1 | S04 |
| .....      | .....       | .....       | .....    | .....      | .....   | .....  | .....    | .....    | ..... | .....           | .....   | ..... | 1 | 0 | S04 |
| .....      | .....       | .....       | .....    | .....      | .....   | .....  | .....    | .....    | ..... | .....           | .....   | ..... | 1 | 0 | S04 |
| .....      | .....       | .....       | .....    | .....      | .....   | .....  | .....    | .....    | ..... | .....           | .....   | ..... | 1 | 1 | S04 |
| .....      | .....       | .....       | .....    | .....      | .....   | .....  | .....    | .....    | ..... | .....           | .....   | ..... | 1 | 0 | S04 |
| .....      | .....       | .....       | .....    | .....      | .....   | .....  | .....    | .....    | ..... | .....           | .....   | ..... | 1 | 1 | S04 |
| .....      | .....       | .....       | .....    | .....      | .....   | .....  | .....    | .....    | ..... | .....           | .....   | ..... | 1 | 0 | S04 |
| .....      | .....       | .....       | .....    | .....      | .....   | .....  | .....    | .....    | ..... | .....           | .....   | ..... | 1 | 1 | S04 |

Provisional ID : chrC03\_1465275  
 Score total : 0  
 Score for star read(s) : -1.3  
 Score for read counts : 0  
 Score for mfe : 1.3  
 Score for randfold : 0  
 Score for cons. seed :  
 Total read count : 74  
 Mature read count : 74  
 Loop read count : 0  
 Star read count : 0

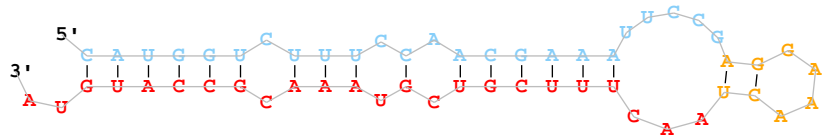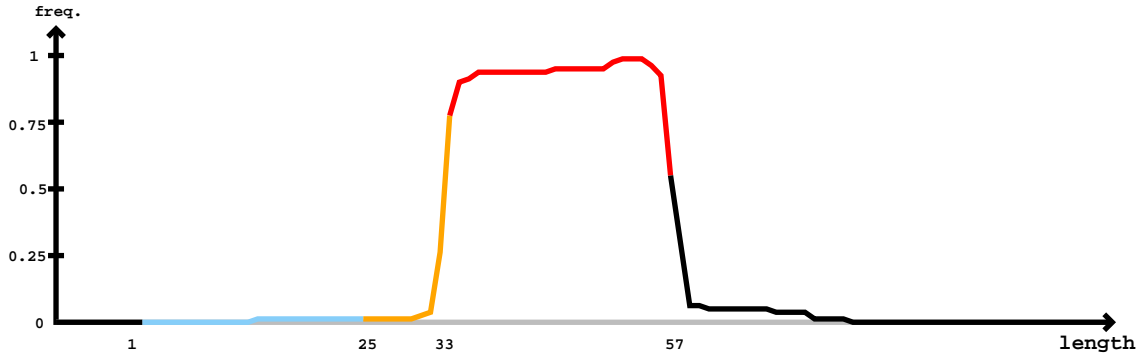

**Star** **Mature**

| 5' -                                                                                                        | 3' | exp | reads | mm | sample |
|-------------------------------------------------------------------------------------------------------------|----|-----|-------|----|--------|
| aaauuucauggucuuuccaacgaaauuccgaggaaaacuaacuuucgucguaaacgccauguaaaauuacgacgaauguuuucgucguaaacucuauguaaguuuac |    |     |       |    |        |
| .....cuaacuuucgucguaaacgccau.....                                                                           |    |     | 1     | 0  | S03    |
| .....uaacuuucgucguaaacgccaugu.....                                                                          |    |     | 6     | 0  | S03    |
| .....aacuuucgucguaaacgccaugG.....                                                                           |    |     | 2     | 1  | S03    |
| .....aacuuucgucguaaacgccaugu.....                                                                           |    |     | 3     | 0  | S03    |
| .....aacuuucgucguaaacgccagGua.....                                                                          |    |     | 1     | 1  | S03    |
| .....aacuuucgucguaaacCcgccaugua.....                                                                        |    |     | 1     | 1  | S03    |
| .....aacuuucgucguaaacgccaugua.....                                                                          |    |     | 9     | 0  | S03    |
| .....acuuucgucguaaacgccaugu.....                                                                            |    |     | 1     | 0  | S03    |
| .....acCuucgucguaaacgccaugua.....                                                                           |    |     | 1     | 1  | S03    |
| .....acuuucgucguaaacgccaugua.....                                                                           |    |     | 1     | 0  | S03    |
| .....cuuucgucguaaacgccaugu.....                                                                             |    |     | 1     | 0  | S03    |
| .....ccauguaaaauuacgacgaaau.....                                                                            |    |     | 1     | 0  | S03    |
| .....cAauguaaaauuacgacgaaau.....                                                                            |    |     | 1     | 1  | S03    |
| .....cauguaaaauuacgacgaaugGu.....                                                                           |    |     | 1     | 1  | S03    |
| .....aacgGaaauccgaggaaaacu.....                                                                             |    |     | 1     | 1  | S04    |
| .....acCaacuuucgucguaaacgccau.....                                                                          |    |     | 1     | 1  | S04    |
| .....uaacuuucgucguaaacgccauA.....                                                                           |    |     | 3     | 1  | S04    |
| .....uaacuuucgucguaaacgccaugC.....                                                                          |    |     | 1     | 1  | S04    |
| .....uaacuuucgucguaaacgccaugA.....                                                                          |    |     | 3     | 1  | S04    |
| .....uaacuuucgucguaaacgccaugu.....                                                                          |    |     | 5     | 0  | S04    |
| .....aacuuucgucguaaacgccaugC.....                                                                           |    |     | 1     | 1  | S04    |
| .....aacuuucgucguaaacgccaugA.....                                                                           |    |     | 1     | 1  | S04    |
| .....aacuuucgucguaaacgccaugu.....                                                                           |    |     | 3     | 0  | S04    |
| .....aacuuucgucguaaacgccagGgu.....                                                                          |    |     | 2     | 1  | S04    |
| .....aacuuucgucguaaacgccaugua.....                                                                          |    |     | 17    | 0  | S04    |
| .....aacuuucgucguaaacgccauguG.....                                                                          |    |     | 2     | 1  | S04    |
| .....acuuucgucguaaacgccaugua.....                                                                           |    |     | 7     | 0  | S04    |
| .....uuucgucguaaacgccaugu.....                                                                              |    |     | 1     | 0  | S04    |
| .....uuucgucguaaacgccauguaaaau.....                                                                         |    |     | 1     | 0  | S04    |
| .....uaaacgccauguaaaauuacgac.....                                                                           |    |     | 1     | 0  | S04    |









Star

Mature

gaggaucacuaguuuguccgaaauuccuccggaauuaccggaaacaaauuuccgaggaauuccgaggaauuccgaggaucacuaguuuguccgaaauuccuccggaauuaccgga

|                                                       |    |   |     |
|-------------------------------------------------------|----|---|-----|
| .....gaggaa <u>uu</u> ccgaggauca <u>cu</u> aguuA..... | 1  | 1 | S04 |
| .....Caggaa <u>uu</u> ccgaggauca <u>cu</u> aguu.....  | 1  | 1 | S04 |
| .....agggaa <u>uu</u> ccgaggauca <u>C</u> .....       | 1  | 1 | S04 |
| .....agggaa <u>uu</u> ccgaggauca <u>cu</u> .....      | 1  | 0 | S04 |
| .....agggaa <u>C</u> uccgaggauca <u>cu</u> ag.....    | 1  | 1 | S04 |
| .....agggaa <u>uu</u> ccgaggauca <u>cu</u> ag.....    | 4  | 0 | S04 |
| .....agggaa <u>uu</u> ccgaggauca <u>cu</u> aguu.....  | 3  | 0 | S04 |
| .....agggaa <u>uu</u> Ugaggauca <u>cu</u> aguu.....   | 1  | 1 | S04 |
| .....agggaa <u>uu</u> ccgaggauca <u>cu</u> aguu.....  | 23 | 0 | S04 |
| .....agggaa <u>uu</u> ccgaggauca <u>C</u> aguu.....   | 1  | 1 | S04 |
| .....agggaa <u>uu</u> ccgaggauca <u>cu</u> Guu.....   | 1  | 1 | S04 |
| .....agggaa <u>uu</u> ccgaggauca <u>cu</u> aguuA..... | 1  | 1 | S04 |
| .....ggaa <u>uu</u> ccgaggauca <u>cu</u> a.....       | 1  | 0 | S04 |
| .....ggaa <u>uu</u> ccgaggauca <u>cu</u> ag.....      | 1  | 0 | S04 |
| .....ggaa <u>G</u> uuccgaggauca <u>cu</u> aguu.....   | 1  | 1 | S04 |
| .....ggaa <u>uu</u> ccgaggauca <u>cu</u> aguu.....    | 5  | 0 | S04 |
| .....ggaa <u>uu</u> ccgaggauca <u>cu</u> agC.....     | 1  | 1 | S04 |
| .....ggaa <u>uu</u> ccgaggauca <u>cu</u> aguu.....    | 4  | 0 | S04 |
| .....ggaa <u>uu</u> ccgaggauca <u>cu</u> aguuC.....   | 1  | 1 | S04 |
| .....ggaa <u>C</u> uccgaggauca <u>cu</u> aguuu.....   | 1  | 1 | S04 |
| .....ggaa <u>uu</u> ccgaggauca <u>cu</u> aguuu.....   | 4  | 0 | S04 |
| .....gaa <u>uu</u> ccgaggauca <u>cu</u> .....         | 1  | 0 | S04 |
| .....gaa <u>uu</u> ccgaggauca <u>cu</u> aguu.....     | 4  | 0 | S04 |
| .....gaa <u>uu</u> ccgaggauca <u>cu</u> aguu.....     | 2  | 0 | S04 |
| .....gaa <u>uu</u> ccgaggauca <u>cu</u> aguuu.....    | 1  | 0 | S04 |
| .....gaa <u>uu</u> ccgaggauca <u>cu</u> aguuuug.....  | 7  | 0 | S04 |
| .....aa <u>uu</u> ccgaggauca <u>cu</u> aguu.....      | 3  | 0 | S04 |
| .....aa <u>uu</u> ccgaggauca <u>cu</u> agC.....       | 1  | 1 | S04 |
| .....aa <u>uu</u> ccgaggauca <u>cu</u> agG.....       | 1  | 1 | S04 |
| .....aa <u>uu</u> ccgaggauca <u>cu</u> aguu.....      | 2  | 0 | S04 |
| .....aa <u>uu</u> ccgaggauca <u>cu</u> aguuu.....     | 1  | 0 | S04 |
| .....aa <u>uu</u> ccgaggauca <u>cu</u> aguuuug.....   | 1  | 0 | S04 |
| .....aa <u>uu</u> ccgaggauca <u>cu</u> agGuu.....     | 1  | 1 | S04 |
| .....aa <u>uu</u> ccgaggauca <u>cu</u> aguuuugG.....  | 1  | 1 | S04 |
| .....Naa <u>uu</u> ccgaggauca <u>cu</u> aguuuug.....  | 2  | 1 | S04 |
| .....aa <u>uu</u> ccgaggauca <u>cu</u> aguuuugA.....  | 1  | 1 | S04 |
| .....aa <u>uu</u> ccgaggauca <u>cu</u> aguuuug.....   | 28 | 0 | S04 |
| .....aa <u>u</u> ccgaggauca <u>cu</u> agA.....        | 1  | 1 | S04 |
| .....aa <u>u</u> ccgaggauca <u>cu</u> aguu.....       | 1  | 0 | S04 |
| .....a <u>G</u> uuccgaggauca <u>cu</u> aguuu.....     | 1  | 1 | S04 |
| .....aa <u>u</u> ccgaggauca <u>cu</u> aguuuC.....     | 1  | 1 | S04 |
| .....aa <u>u</u> ccgaggauca <u>cu</u> agGuu.....      | 1  | 1 | S04 |
| .....aa <u>u</u> ccgaggauca <u>cu</u> aguuuug.....    | 9  | 0 | S04 |
| .....aa <u>u</u> ccgaggauca <u>cu</u> aguuuug.....    | 3  | 0 | S04 |
| .....aa <u>u</u> ccgaggauca <u>G</u> uaguuuug.....    | 1  | 1 | S04 |
| .....aa <u>u</u> ccgaggauca <u>cu</u> aguuuU.....     | 1  | 1 | S04 |
| .....aa <u>u</u> ccgaggauca <u>cu</u> aguuuuguc.....  | 23 | 0 | S04 |
| .....aa <u>u</u> ccgaggauca <u>cu</u> aguuuugua.....  | 1  | 1 | S04 |
| .....aa <u>u</u> ccgaggauca <u>cu</u> aguuuugCc.....  | 1  | 1 | S04 |
| .....aa <u>u</u> ccgaggauca <u>cu</u> agCuuguc.....   | 1  | 1 | S04 |
| .....a <u>u</u> ccgaggauca <u>cu</u> aguu.....        | 1  | 0 | S04 |
| .....a <u>u</u> ccgaggauca <u>cu</u> aguuuug.....     | 4  | 0 | S04 |
| .....a <u>u</u> ccgaggauca <u>cu</u> aguuuug.....     | 9  | 0 | S04 |
| .....a <u>u</u> ccgaggauca <u>cu</u> aguuuugA.....    | 2  | 1 | S04 |
| .....a <u>u</u> ccgaggauca <u>cu</u> aguuuugCc.....   | 1  | 1 | S04 |
| .....a <u>u</u> ccgaggauca <u>cu</u> aguuuuguc.....   | 1  | 0 | S04 |
| .....a <u>u</u> ccgaggauca <u>cu</u> aguuuugua.....   | 3  | 1 | S04 |
| .....a <u>u</u> ccgaggauca <u>cu</u> aguuuugucU.....  | 4  | 1 | S04 |
| .....u <u>u</u> ccgaggauca <u>cu</u> aguu.....        | 1  | 0 | S04 |
| .....u <u>u</u> ccgaggauca <u>cu</u> aguuu.....       | 1  | 0 | S04 |
| .....u <u>u</u> ccgaggauca <u>cu</u> aguuuug.....     | 1  | 0 | S04 |
| .....u <u>u</u> ccgaggauca <u>cu</u> aguuuuguc.....   | 11 | 0 | S04 |
| .....u <u>u</u> ccgaggauca <u>cu</u> aguuuugucc.....  | 2  | 0 | S04 |
| .....u <u>u</u> ccgaggauca <u>cu</u> aguuuugucU.....  | 4  | 1 | S04 |
| .....u <u>u</u> ccgaggauca <u>cu</u> aguuuU.....      | 2  | 1 | S04 |
| .....u <u>u</u> ccgaggauca <u>cu</u> aguuuugua.....   | 1  | 1 | S04 |
| .....u <u>u</u> ccgaggauca <u>cu</u> aguuuuguc.....   | 3  | 0 | S04 |
| .....c <u>c</u> gaggauca <u>cu</u> aguuuug.....       | 1  | 0 | S04 |
| .....c <u>c</u> gaggauca <u>cu</u> aguuuuguc.....     | 2  | 0 | S04 |
| .....c <u>c</u> gaggauca <u>cu</u> aguuuuguc.....     | 1  | 0 | S04 |

Star

Mature

gaggaucacuaguuuguccgaaaucuccucggaauuaaccgaugaacaaauuuccgaggaauuccgaggaucacuaguuuguccgaaaucuccucggaauuaaccgauga

.....cgaggaucacuaguuugucU.....

1

1

S04

Provisional ID : chrC03\_1484919  
 Score total : 1.9  
 Score for star read(s) : 3.9  
 Score for read counts : -2.3  
 Score for mfe : 0.4  
 Score for randfold : 0  
 Score for cons. seed :  
 Total read count : 7  
 Mature read count : 6  
 Loop read count : 0  
 Star read count : 1

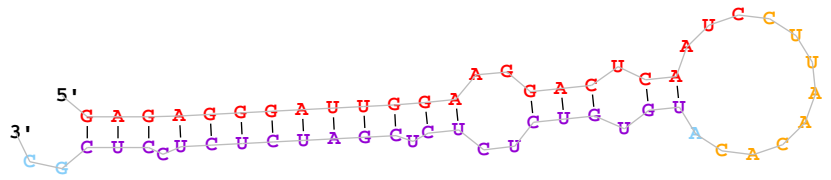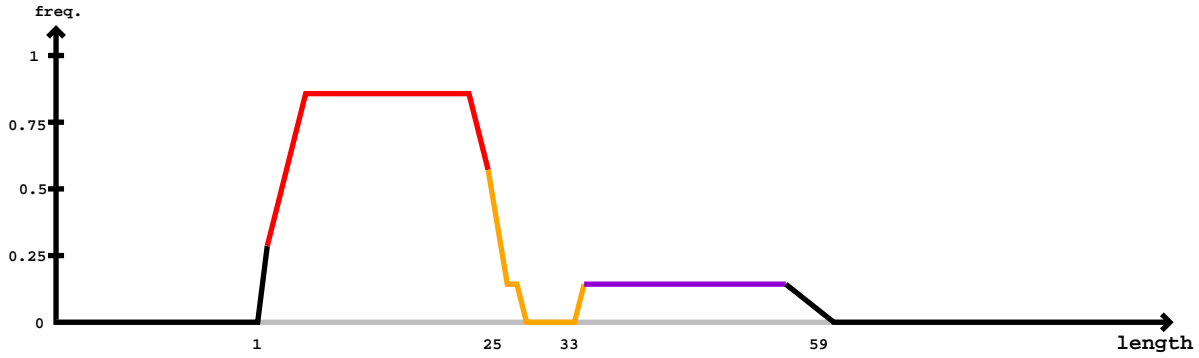

**Mature**

**Star**

| 5' | Sequence                                                                                                                      | 3' | obs | exp | reads | mm | sample |
|----|-------------------------------------------------------------------------------------------------------------------------------|----|-----|-----|-------|----|--------|
|    | uagcuagggaucaauccuucgagagggauuggaaggacucaauccuuuacacaugugucucucucgaucucuccucgucuccaucucuccaccauggcuccuucuaaauucuc             |    |     |     |       |    |        |
|    | uagcuagggaucaauccuucgagagggauuggaaggacucaauccuuuacacaugugucucucucgaucucuccucgucuccaucucuccaccauggcuccuucuaaauucuc             |    |     |     |       |    |        |
|    | .....((((((((.....((((((((((((.....((((.....)))))))))).....)))))).....)))))).....)))))).....)))))).....)))))).....))))))..... |    |     |     |       |    |        |
|    | .....gagagggauuggaaggacucaau.....                                                                                             |    | 1   | 0   | 1     | 0  | S03    |
|    | .....agggauuggaaggacucaau.....                                                                                                |    | 1   | 0   | 1     | 0  | S03    |
|    | .....gggauuggaaggacucaauccuu.....                                                                                             |    | 1   | 0   | 1     | 0  | S03    |
|    | .....gagagggauuggaaggacuca.....                                                                                               |    | 1   | 0   | 1     | 0  | S04    |
|    | .....agagggauuggaaggacucaaucc.....                                                                                            |    | 1   | 0   | 1     | 0  | S04    |
|    | .....gagggauuggaaggacucaau.....                                                                                               |    | 1   | 0   | 1     | 0  | S04    |
|    | .....ugugucucucucgaucCuccuc.....                                                                                              |    | 1   | 1   | 1     | 1  | S04    |

Provisional ID : chrC03\_1485517  
 Score total : 2  
 Score for star read(s) : 3.9  
 Score for read counts : -3.9  
 Score for mfe : 2  
 Score for randfold : 0  
 Score for cons. seed :  
 Total read count : 4  
 Mature read count : 3  
 Loop read count : 0  
 Star read count : 1

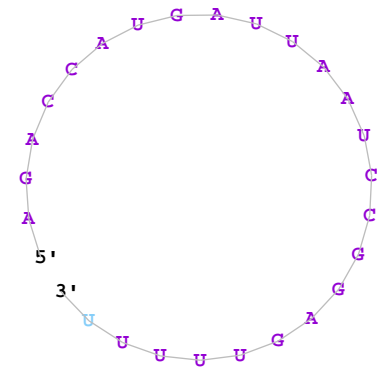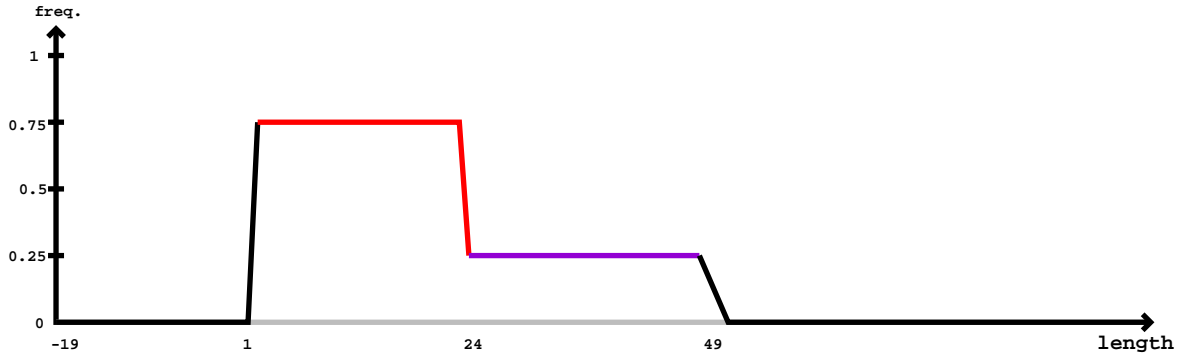

**Mature Star**

| 5' - | Sequence                                                                                                         | 3' | obs | exp | reads | mm | sample |
|------|------------------------------------------------------------------------------------------------------------------|----|-----|-----|-------|----|--------|
|      | guacuaagaaccucguuaaggacuccggauaaa caugcucuagaccaugauua auccggaguuuuuaaaaguggguucuuagcgagaguuuagaaauguuuguuuacuuc |    |     |     |       |    |        |
|      | .....ggacuccggauaaa caugcucu.....                                                                                |    | 1   | 0   | 1     |    | S03    |
|      | .....ggacuccggauaaa caugcucuG.....                                                                               |    | 1   | 1   | 1     |    | S03    |
|      | .....Ugacuccggauaaa caugcucu.....                                                                                |    | 1   | 1   | 1     |    | S04    |
|      | .....agaccaugauua auccggaguuGu.....                                                                              |    | 1   | 1   | 1     |    | S04    |

Provisional ID : chrC03\_1506159  
 Score total : 0  
 Score for star read(s) : -1.3  
 Score for read counts : 0  
 Score for mfe : 1.3  
 Score for randfold : 0  
 Score for cons. seed :  
 Total read count : 184  
 Mature read count : 184  
 Loop read count : 0  
 Star read count : 0

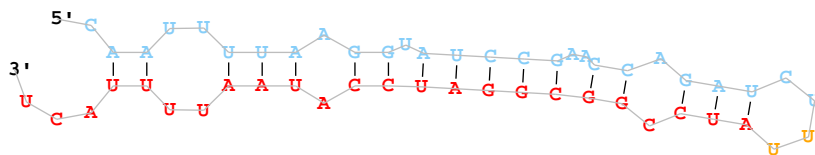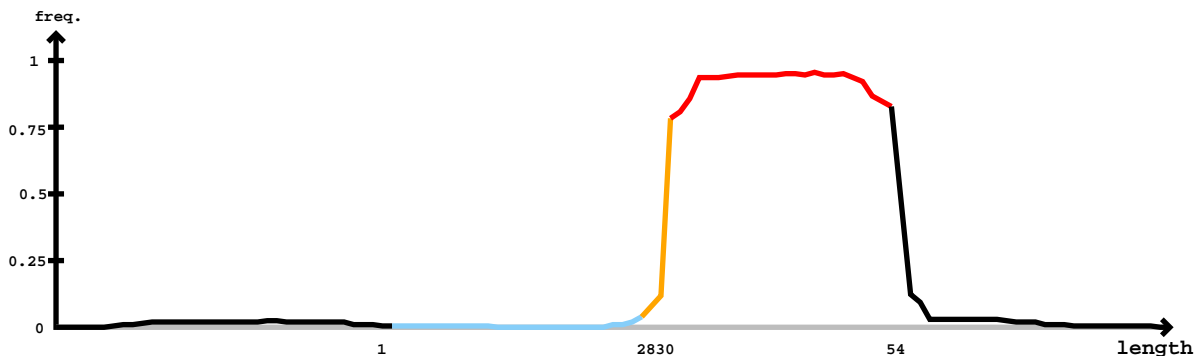

| 5' -                                                                                                                    | Star | Mature | -3' | exp | reads | mm | sample |
|-------------------------------------------------------------------------------------------------------------------------|------|--------|-----|-----|-------|----|--------|
| gucgcuaggccugggacggauccggaauuucgggcauuuuuaagguauccgaaccagauuuuuuauccggcggaucuccuaauuuuaucuaucuuuauccggauccgagguuuucgga  |      |        |     |     |       |    |        |
| .....cuaggccugggacggauccggaauuucgggcauuuuuaagguauccgaaccagauuuuuuauccggcggaucuccuaauuuuaucuaucuuuauccggauccgagguuuucgga |      |        |     |     | 1     | 0  | S03    |
| .....uaggccugggacggauccggaauuucgggcauuuuuaagguauccgaaccagauuuuuuauccggcggaucuccuaauuuuaucuaucuuuauccggauccgagguuuucgga  |      |        |     |     | 1     | 0  | S03    |
| .....ucggauuucgggcauuuuuaagguauccgaaccagauuuuuuauccggcggaucuccuaauuuuaucuaucuuuauccggauccgagguuuucgga                   |      |        |     |     | 1     | 0  | S03    |
| .....auuuuuauccggcggaucuccuaauuuuaucuaucuuuauccggauccgagguuuucgga                                                       |      |        |     |     | 1     | 0  | S03    |
| .....auuuuuauccggcggaucuccuaauuuuaucuaucuuuauccggauccgagguuuucgga                                                       |      |        |     |     | 1     | 1  | S03    |
| .....cuuuuauccggcggaucuccuaauuuuaucuaucuuuauccggauccgagguuuucgga                                                        |      |        |     |     | 1     | 0  | S03    |
| .....uCuauccggcggaucuccuaauuuuaucuaucuuuauccggauccgagguuuucgga                                                          |      |        |     |     | 1     | 1  | S03    |
| .....uuuuauccggcggaucuccuaauuuuaucuaucuuuauccggauccgagguuuucgga                                                         |      |        |     |     | 1     | 0  | S03    |
| .....uuauccggcggaucuccuaauuuuaucuaucuuuauccggauccgagguuuucgga                                                           |      |        |     |     | 1     | 0  | S03    |
| .....uauccggcggaucuccuaauuuuaucuaucuuuauccggauccgagguuuucgga                                                            |      |        |     |     | 1     | 0  | S03    |
| .....uaucggcggaucuccuaauuuuaucuaucuuuauccggauccgagguuuucgga                                                             |      |        |     |     | 1     | 0  | S03    |
| .....uaucggcggaucuccuaauuuuaucuaucuuuauccggauccgagguuuucgga                                                             |      |        |     |     | 1     | 0  | S03    |
| .....auccggcggaucuccuaauuuuaucuaucuuuauccggauccgagguuuucgga                                                             |      |        |     |     | 1     | 0  | S03    |
| .....auccggcggaucuccuaauuuuaucuaucuuuauccggauccgagguuuucgga                                                             |      |        |     |     | 1     | 0  | S03    |
| .....auccggcggaAccuaauuuuaucuaucuuuauccggauccgagguuuucgga                                                               |      |        |     |     | 1     | 1  | S03    |
| .....auccggcggaAccuaauuuuaucuaucuuuauccggauccgagguuuucgga                                                               |      |        |     |     | 1     | 1  | S03    |
| .....auccggcggaAccuaauuuuaucuaucuuuauccggauccgagguuuucgga                                                               |      |        |     |     | 1     | 1  | S03    |
| .....auccggcggaAccuaauuuuaucuaucuuuauccggauccgagguuuucgga                                                               |      |        |     |     | 1     | 1  | S03    |
| .....auccggcggaAccuaauuuuaucuaucuuuauccggauccgagguuuucgga                                                               |      |        |     |     | 1     | 1  | S03    |
| .....auccggcggaAccuaauuuuaucuaucuuuauccggauccgagguuuucgga                                                               |      |        |     |     | 1     | 1  | S03    |
| .....auccggcggaAccuaauuuuaucuaucuuuauccggauccgagguuuucgga                                                               |      |        |     |     | 1     | 1  | S03    |
| .....auccggcggaAccuaauuuuaucuaucuuuauccggauccgagguuuucgga                                                               |      |        |     |     | 1     | 1  | S03    |
| .....auccggcggaAccuaauuuuaucuaucuuuauccggauccgagguuuucgga                                                               |      |        |     |     | 1     | 1  | S03    |
| .....auccggcggaAccuaauuuuaucuaucuuuauccggauccgagguuuucgga                                                               |      |        |     |     | 1     | 1  | S03    |
| .....auccggcggaAccuaauuuuaucuaucuuuauccggauccgagguuuucgga                                                               |      |        |     |     | 1     | 1  | S03    |
| .....auccggcggaAccuaauuuuaucuaucuuuauccggauccgagguuuucgga                                                               |      |        |     |     | 1     | 1  | S03    |
| .....auccggcggaAccuaauuuuaucuaucuuuauccggauccgagguuuucgga                                                               |      |        |     |     | 1     | 1  | S03    |
| .....auccggcggaAccuaauuuuaucuaucuuuauccggauccgagguuuucgga                                                               |      |        |     |     | 1     | 1  | S03    |
| .....auccggcggaAccuaauuuuaucuaucuuuauccggauccgagguuuucgga                                                               |      |        |     |     | 1     | 1  | S03    |
| .....auccggcggaAccuaauuuuaucuaucuuuauccggauccgagguuuucgga                                                               |      |        |     |     | 1     | 1  | S03    |
| .....auccggcggaAccuaauuuuaucuaucuuuauccggauccgagguuuucgga                                                               |      |        |     |     | 1     | 1  | S03    |
| .....auccggcggaAccuaauuuuaucuaucuuuauccggauccgagguuuucgga                                                               |      |        |     |     | 1     | 1  | S03    |
| .....uuuauccuuuauccggaucgga                                                                                             |      |        |     |     | 1     | 1  | S03    |
| .....Uuuauccggauccgagguuuucggg                                                                                          |      |        |     |     | 1     | 1  | S03    |
| .....ggccugggacggauccggaauuu                                                                                            |      |        |     |     | 1     | 0  | S04    |

Star

Mature

|                                     |                              |                          |                              |    |   |     |
|-------------------------------------|------------------------------|--------------------------|------------------------------|----|---|-----|
| gucgcuaggccugggacgggaucggauauucggg  | cauuuuuaagguaucogaaccagaucuu | uaucggcggaucacuaauuuuacu | auccuuauccggauccgagguuuucgga |    |   |     |
| .....gccugAgacgggaucggauauucgg..... |                              |                          |                              | 1  | 1 | S04 |
| .....Cuuuauccggcggaucac.....        |                              |                          |                              | 1  | 0 | S04 |
| .....uuuauccggcggaucacuaauuuu.....  |                              |                          |                              | 2  | 0 | S04 |
| .....uuauccggcggaucacua.....        |                              |                          |                              | 1  | 0 | S04 |
| .....uuauccggcggaucacuaauu.....     |                              |                          |                              | 1  | 0 | S04 |
| .....uuuauccggcggaucacuaauuuu.....  |                              |                          |                              | 1  | 0 | S04 |
| .....uuauccggcggaucacuaauuuu.....   |                              |                          |                              | 2  | 0 | S04 |
| .....uauccggcggaucacuaauuuu.....    |                              |                          |                              | 1  | 0 | S04 |
| .....uauccggcggaucacuaauuuu.....    |                              |                          |                              | 1  | 0 | S04 |
| .....uauccggcggaucacuaauuuuac.....  |                              |                          |                              | 3  | 0 | S04 |
| .....uauccggcggaucacuaauuuuacu..... |                              |                          |                              | 1  | 0 | S04 |
| .....aucggcggaucacuaauuuu.....      |                              |                          |                              | 1  | 0 | S04 |
| .....aucggcggaucacuaauuuu.....      |                              |                          |                              | 2  | 0 | S04 |
| .....Guccggcggaucacuaauuuu.....     |                              |                          |                              | 1  | 1 | S04 |
| .....aucggcggaucacuaCuuuua.....     |                              |                          |                              | 1  | 1 | S04 |
| .....aucggcggaucacuaauuuuacC.....   |                              |                          |                              | 6  | 1 | S04 |
| .....aucggcggaucacuaauuuuacu.....   |                              |                          |                              | 1  | 1 | S04 |
| .....aucggcggaucacuaauuuuacu.....   |                              |                          |                              | 1  | 1 | S04 |
| .....Uuccggcggaucacuaauuuuacu.....  |                              |                          |                              | 1  | 1 | S04 |
| .....aucggcggaucacuaauuuuacu.....   |                              |                          |                              | 51 | 0 | S04 |
| .....aucggcggaucacuaauuuuacG.....   |                              |                          |                              | 6  | 1 | S04 |
| .....aucggcggaucacuaauuuuacu.....   |                              |                          |                              | 1  | 1 | S04 |
| .....aucggcggaucacuaauuuuacu.....   |                              |                          |                              | 1  | 0 | S04 |
| .....uccggcggaucacuaauuuuacu.....   |                              |                          |                              | 3  | 0 | S04 |
| .....uccggcggaucacuaauuuuacu.....   |                              |                          |                              | 1  | 0 | S04 |
| .....ccggcggaucacuaauuuuacu.....    |                              |                          |                              | 1  | 0 | S04 |
| .....ccggcggaucacuaauuuuacu.....    |                              |                          |                              | 1  | 0 | S04 |
| .....ccggcggaucacuaauuuuacu.....    |                              |                          |                              | 2  | 0 | S04 |
| .....cggcggaucacuaauuuuacu.....     |                              |                          |                              | 4  | 0 | S04 |
| .....cggcggaucacuaauuuuacu.....     |                              |                          |                              | 1  | 1 | S04 |
| .....cggcggaucacuaauuuuacCauc.....  |                              |                          |                              | 1  | 1 | S04 |
| .....ggaucacuaCuuuuacu.....         |                              |                          |                              | 1  | 1 | S04 |
| .....cauaauuuuacuauccuuauccg.....   |                              |                          |                              | 1  | 0 | S04 |
| .....cauaauuuuacuauccuuauccg.....   |                              |                          |                              | 1  | 0 | S04 |
| .....aauuuacuauccuuauccggauc.....   |                              |                          |                              | 2  | 0 | S04 |



**Mature**

**Star**

|                                                                                                                                                                                                                              |   |   |     |
|------------------------------------------------------------------------------------------------------------------------------------------------------------------------------------------------------------------------------|---|---|-----|
| uccaaagucaagcuaa <u>aug</u> cu <u>uaaca</u> aaagcg <u>cug</u> agugggaggcaacc <u>acua</u> uuugg <u>ua</u> uuu <u>uca</u> uu <u>ucaguu</u> aug <u>uu</u> agag <u>ugu</u> ugcuga <u>uuuuu</u> g <u>uuuuu</u> uuuuuu <u>uaug</u> |   |   |     |
| ..... augacua <u>uaaca</u> aaagcg <u>cuga</u> A <u>ug</u> .....                                                                                                                                                              | 1 | 1 | S04 |
| ..... ugacua <u>uaaca</u> aaagcg <u>cug</u> agA.....                                                                                                                                                                         | 1 | 1 | S04 |
| ..... ugacua <u>uaaca</u> aaagcg <u>cu</u> Aagugg.....                                                                                                                                                                       | 1 | 1 | S04 |
| ..... gacua <u>uaaca</u> aaagcg <u>cug</u> agu.....                                                                                                                                                                          | 1 | 0 | S04 |
| ..... acua <u>uaaca</u> aaagcg <u>cug</u> agugga.....                                                                                                                                                                        | 1 | 0 | S04 |
| ..... agcg <u>cug</u> aguggaggcaaccG.....                                                                                                                                                                                    | 1 | 1 | S04 |
| ..... caguu <u>ua</u> gu <u>ua</u> gag <u>ugu</u> ugcuga.....                                                                                                                                                                | 1 | 0 | S04 |



Provisional ID : chrC03\_1526870  
 Score total : 0.1  
 Score for star read(s) : -1.3  
 Score for read counts : 0  
 Score for mfe : 1.4  
 Score for randfold : 0  
 Score for cons. seed :  
 Total read count : 23  
 Mature read count : 8  
 Loop read count : 12  
 Star read count : 3

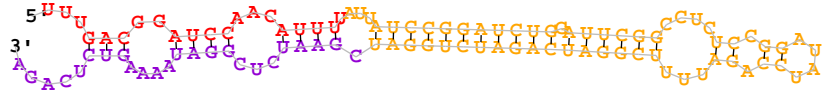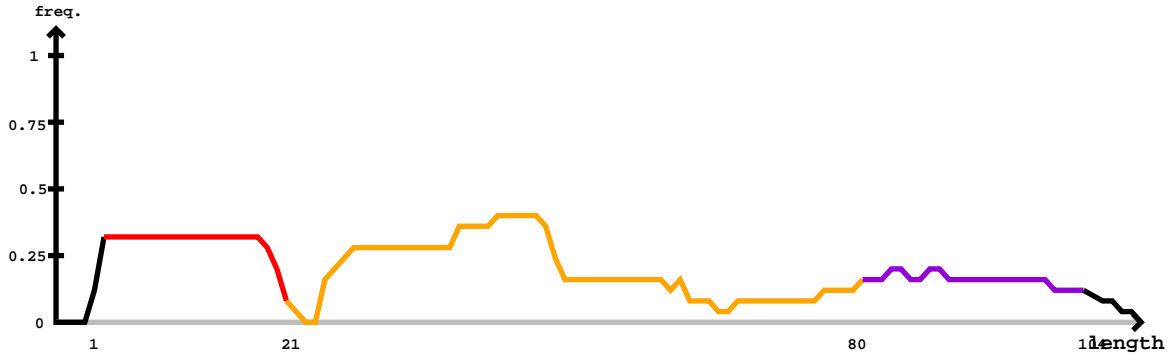

**Mature**

**Star**

| 5' -                                                                                                                                | 3' | obs | exp | reads | mm | sample |
|-------------------------------------------------------------------------------------------------------------------------------------|----|-----|-----|-------|----|--------|
| ggc <u>uuugacggauccaacauuuuuuuu</u> auuauccggauucggauucggccucuccggauauccagauuuucggauucagauucggauucggaucggaucucggauaaaagucucagaccuac |    | 1   | 0   | 1     | 0  | S03    |
| ggc <u>uuugacggauccaacauuuuuuuu</u> auuauccggauucggauucggccucuccggauauccagauuuucggauucagauucggauucggaucggaucucggauaaaagucucagaccuac |    | 2   | 1   | 2     | 1  | S03    |
| .....uuugacggauccaacauC.....                                                                                                        |    | 1   | 1   | 1     | 1  | S03    |
| .....cggauucggauucggccucA.....                                                                                                      |    | 1   | 0   | 1     | 0  | S03    |
| .....uuucggauucagauucggauucggaucggaau.....                                                                                          |    | 1   | 1   | 1     | 1  | S03    |
| .....ggauucggaucggauaaaagucG.....                                                                                                   |    | 1   | 1   | 1     | 1  | S03    |
| .....aucucggauaaaagucucagaAcu..                                                                                                     |    | 1   | 0   | 1     | 0  | S04    |
| .....cuuugacggauccaacauu.....                                                                                                       |    | 1   | 0   | 1     | 0  | S04    |
| .....uuugacggauccaacauu.....                                                                                                        |    | 1   | 0   | 1     | 0  | S04    |
| .....uuugacggauccaacauuu.....                                                                                                       |    | 2   | 0   | 2     | 0  | S04    |
| .....aucggauucggauucggccucG.....                                                                                                    |    | 1   | 1   | 1     | 1  | S04    |
| .....aucggauucggauucgAccucuc.....                                                                                                   |    | 1   | 0   | 1     | 0  | S04    |
| .....aucggauucggauucggccucuc.....                                                                                                   |    | 2   | 1   | 2     | 1  | S04    |
| .....uccggauucggauucggccucA.....                                                                                                    |    | 1   | 0   | 1     | 0  | S04    |
| .....cggauucggauucggccu.....                                                                                                        |    | 1   | 1   | 1     | 1  | S04    |
| .....ucggccucuccggauauccagauu.....                                                                                                  |    | 1   | 0   | 1     | 0  | S04    |
| .....ucggccucuccggauauccagauu.....                                                                                                  |    | 1   | 1   | 1     | 1  | S04    |
| .....ccucuccggauauccaUa.....                                                                                                        |    | 1   | 0   | 1     | 0  | S04    |
| .....cuccggauauccagauuuuc.....                                                                                                      |    | 1   | 1   | 1     | 1  | S04    |
| .....aucagauucggauucggaucucC.....                                                                                                   |    | 1   | 0   | 1     | 0  | S04    |
| .....cgauucggauaaaagucucaga.....                                                                                                    |    | 1   | 1   | 1     | 1  | S04    |
| .....cggauaaaUucucagaccuac                                                                                                          |    | 1   | 1   | 1     | 1  | S04    |

Provisional ID : chrC03\_1539994  
 Score total : 0.5  
 Score for star read(s) : 3.9  
 Score for read counts : -4.9  
 Score for mfe : 1.6  
 Score for randfold : 0  
 Score for cons. seed :  
 Total read count : 2  
 Mature read count : 1  
 Loop read count : 0  
 Star read count : 1

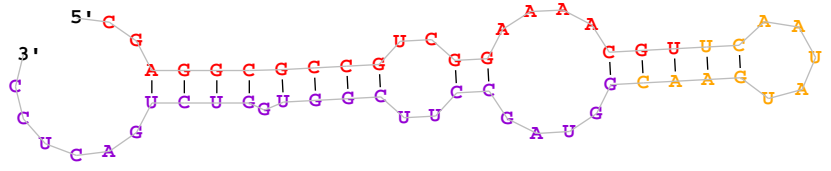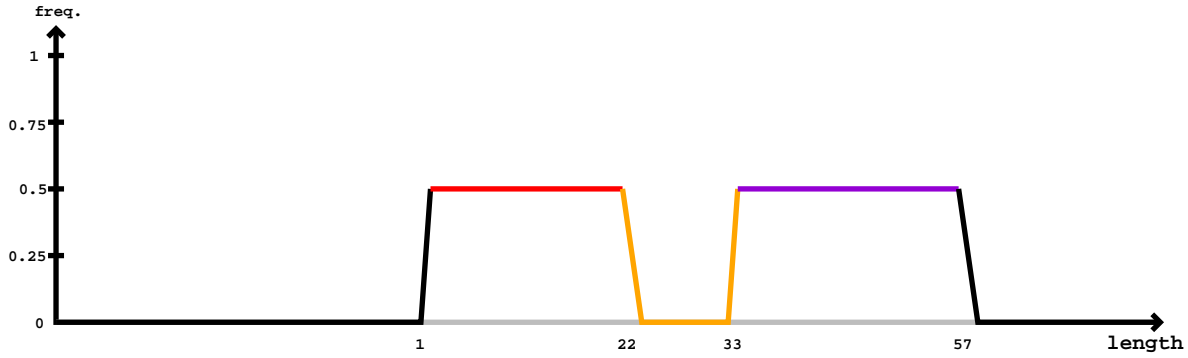

Mature
Star

|                                                                                                                                                                                                                                                                                                                                                                                            |                                                         |
|--------------------------------------------------------------------------------------------------------------------------------------------------------------------------------------------------------------------------------------------------------------------------------------------------------------------------------------------------------------------------------------------|---------------------------------------------------------|
| 5' - guucgccuaauuucaaaaaccucucaggccaggguuucgaggcgccgucggaaaacguucaauaugaacgguagccuucgguggucugacucgcgaccugggcuccgguuccaau<br>guucgccuaauuucaaaaaccucucaggccaggguuucgaggcgccgucggaaaacguucaauaugaacgguagccuucgguggucugacucgcgaccugggcuccgguuccaau<br>.....(((((((((((.(.((((((.(.....)))))).....)))))).)))).)).....<br>.....gguagccuucgguggucugacucU.....<br>.....cgaggcgccgucggaaaacgu..... | -3' obs<br>exp<br>reads mm sample<br>1 1 s03<br>1 0 s04 |
|--------------------------------------------------------------------------------------------------------------------------------------------------------------------------------------------------------------------------------------------------------------------------------------------------------------------------------------------------------------------------------------------|---------------------------------------------------------|



```

Provisional ID : chrC03_random_2825340
Score total : 1
Score for star read(s) : 3.9
Score for read counts : -4.4
Score for mfe : 1.6
Score for randfold : 0
Score for cons. seed :
Total read count : 3
Mature read count : 2
Loop read count : 0
Star read count : 1

```

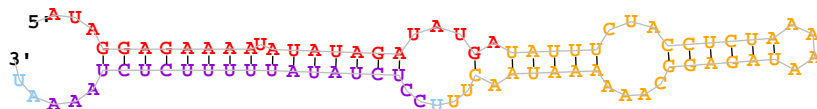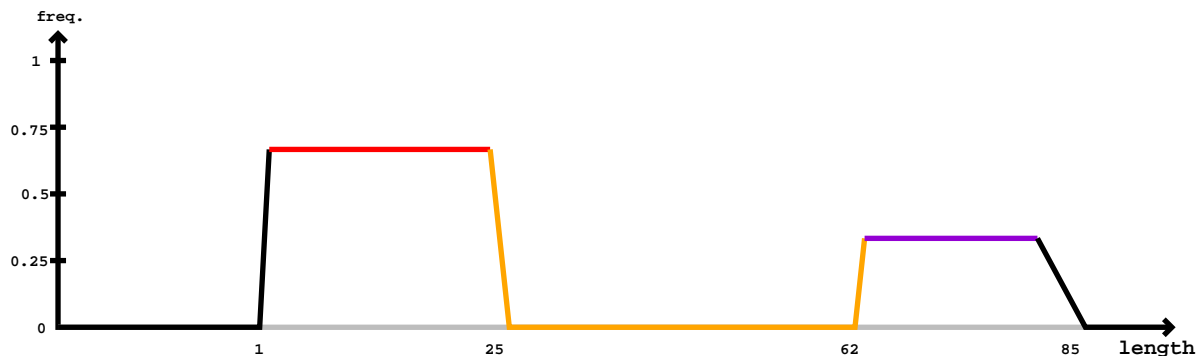

**Mature**

**Star**

|                                                                                        |     |       |    |        |
|----------------------------------------------------------------------------------------|-----|-------|----|--------|
| 5' - auaauagaguuucucuauuuauaggagaaaauuauagauaugauuuuuuacccucuaaaaauagggcaaaaaaaacuuu   | -3' | obs   |    |        |
| auaaauagaguuucucuauuuauaggagaaaauuauagauaugauuuuuuacccucuaaaaauagggcaaaaaaaacuuu       |     | exp   |    |        |
| .....((((((((((((.....((((((((((((((((.....((((((((((((((((.....)))))))))))))))))))))) |     | reads | mm | sample |
| .....auaggagaaaauuauagauauga.....                                                      | 2   | 0     |    | S03    |
| .....ccucuauuuuuucucuaaa.....                                                          | 1   | 0     |    | S04    |

Provisional ID : chrC03\_random\_2826462  
 Score total : 225.8  
 Score for star read(s) : 3.9  
 Score for read counts : 224.4  
 Score for mfe : -2.4  
 Score for randfold : 0  
 Score for cons. seed :  
 Total read count : 452  
 Mature read count : 440  
 Loop read count : 0  
 Star read count : 12

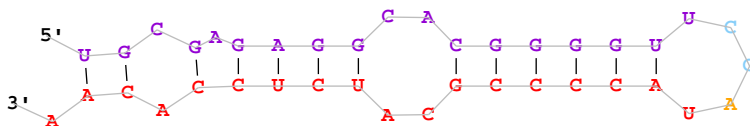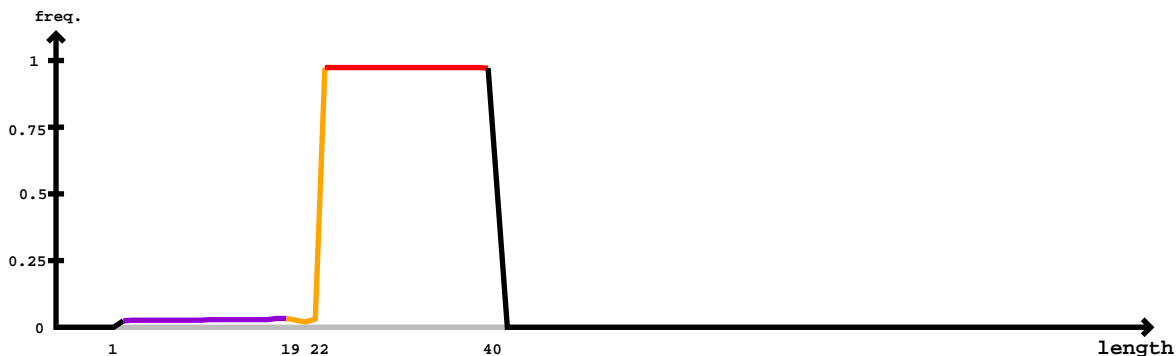

**Star                      Mature**

| 5' -                                                                                                                              | -3' | obs | exp | reads | mm  | sample |
|-----------------------------------------------------------------------------------------------------------------------------------|-----|-----|-----|-------|-----|--------|
| uugcau <u>gcgagaggcacgggguu</u> <u>cgauaccccgcaucuccac</u> aaauuuuuuuuuuucugcuuuuuuuuuuacaagcccagaccaccaucugcucaacgugcucaucuauuuu |     |     |     |       |     |        |
| uugcau <u>gcgagaggcacgggguu</u> <u>cgauaccccgcaucuccac</u> aaauuuuuuuuuuucugcuuuuuuuuuuacaagcccagaccaccaucugcucaacgugcucaucuauuuu |     |     |     |       |     |        |
| ..((((..(((..((((.....))))))..)))).....((((.....))))..(((.....)))).....)))).....                                                  |     |     |     |       |     |        |
| .....ugcgagaggcacgggguC.....                                                                                                      |     | 4   | 1   | 1     | S03 |        |
| .....ugcgagaggcacgggguG.....                                                                                                      |     | 1   | 1   | 1     | S03 |        |
| .....Agcgagaggcacgggguu.....                                                                                                      |     | 1   | 1   | 1     | S03 |        |
| .....uUcgagaggcacggggu.....                                                                                                       |     | 1   | 1   | 1     | S03 |        |
| .....cacgggguucgauaccccgcaucuccacCa.....                                                                                          |     | 1   | 1   | 1     | S03 |        |
| .....uucgauaccccgcaucuccacCa.....                                                                                                 |     | 2   | 1   | 1     | S03 |        |
| .....gauaccccgcaucuccacCa.....                                                                                                    |     | 2   | 1   | 1     | S03 |        |
| .....auaccccgcaucuccacCa.....                                                                                                     |     | 3   | 1   | 1     | S03 |        |
| .....uaccccgcaucuccacCa.....                                                                                                      |     | 220 | 1   | 1     | S03 |        |
| .....ugcgagaggcacgggguA.....                                                                                                      |     | 2   | 1   | 1     | S04 |        |
| .....Gcgagaggcacgggguu.....                                                                                                       |     | 1   | 1   | 1     | S04 |        |
| .....gcgagaggcacgggguuC.....                                                                                                      |     | 1   | 1   | 1     | S04 |        |
| .....gauaccccgcaucuccacC.....                                                                                                     |     | 1   | 1   | 1     | S04 |        |
| .....gauaccccgcaucuccacCa.....                                                                                                    |     | 2   | 1   | 1     | S04 |        |
| .....auaccccgcaucuccacCa.....                                                                                                     |     | 3   | 1   | 1     | S04 |        |
| .....uCcccgcaucuccacaa.....                                                                                                       |     | 1   | 1   | 1     | S04 |        |
| .....uaccccgcaucuccacCa.....                                                                                                      |     | 208 | 1   | 1     | S04 |        |



**Mature Star**

aaauaaaaaauaaaauacuaaccaaguuguugucccggucauggguugggaugggagaccgggagaugcucuaagaccugguuguugaaccaauuguugaacugacaugacc







Provisional ID : chrC03\_random\_2838361  
 Score total : 1  
 Score for star read(s) : -1.3  
 Score for read counts : 0  
 Score for mfe : 2.3  
 Score for randfold : 0  
 Score for cons. seed :  
 Total read count : 19  
 Mature read count : 19  
 Loop read count : 0  
 Star read count : 0

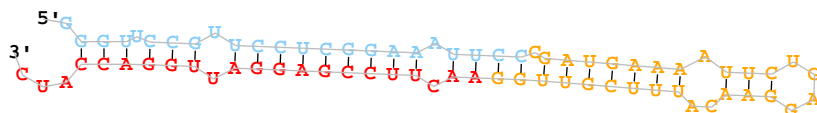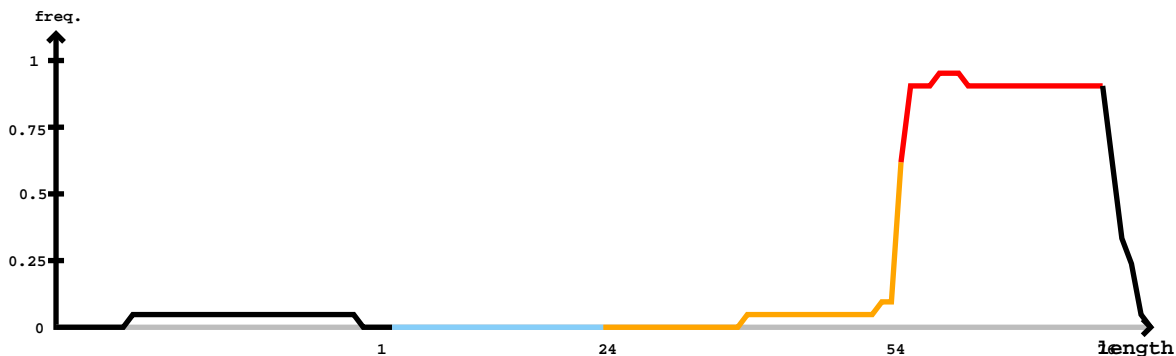

**Star**

**Mature**

| 5' -                                                                                                             | reads | mm | sample |
|------------------------------------------------------------------------------------------------------------------|-------|----|--------|
| auaccgagggaucuccaucggaauuuuccggaaggguuccgguuccucggaauuuccggaugaaaauucugaggaacauuucguuggaacuuccgaggauuggaccaucgga | 1     | 1  | S03    |
| .....aggaacauuucguuggaacuucA.....                                                                                | 1     | 0  | S03    |
| .....ggaacuuccgaggauuggaccaucg...                                                                                | 3     | 0  | S03    |
| .....aacuuccgaggauuggaccauc...                                                                                   | 1     | 0  | S03    |
| .....aacuuccgaggauuggaccaucg...                                                                                  | 1     | 1  | S03    |
| .....acuuccgaggauuggaccauUgga.                                                                                   | 1     | 1  | S03    |
| .....uuccgaggauuggaccaucAgga                                                                                     | 1     | 1  | S03    |
| .....agggaucuccUuccucggaauuuuc.....                                                                              | 1     | 1  | S04    |
| .....aacuuccgaggauuggaccauc...                                                                                   | 1     | 0  | S04    |
| .....aacuuccgaggauuggaccauU...                                                                                   | 1     | 1  | S04    |
| .....aacuuccgaggauuggaccaucg...                                                                                  | 1     | 0  | S04    |
| .....aacuuccgaggauuggaccaucU...                                                                                  | 1     | 1  | S04    |
| .....aacuuccgaggauuggaccaucA...                                                                                  | 2     | 1  | S04    |
| .....aacuuccgaggauuggaccaucg...                                                                                  | 1     | 0  | S04    |
| .....acuuccgaggauuggaccauc...                                                                                    | 1     | 0  | S04    |
| .....acuuccgaggauuggaccaucg...                                                                                   | 1     | 0  | S04    |
| .....acuuccgaggauuggaccauAgga.                                                                                   | 1     | 1  | S04    |
| .....acuuccgaggauuggaccaucgga.                                                                                   | 2     | 0  | S04    |



Provisional ID : chrC04\_1557336  
Score total : 4.4  
Score for star read(s) : 3.9  
Score for read counts : 0.1  
Score for mfe : 0.4  
Score for randfold : 0  
Score for cons. seed :  
Total read count : 12  
Mature read count : 8  
Loop read count : 0  
Star read count : 4

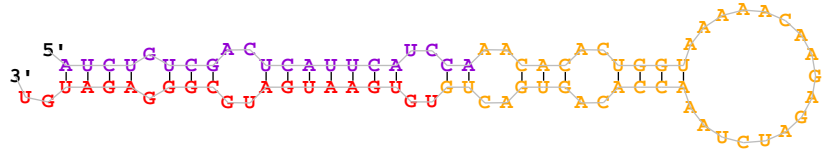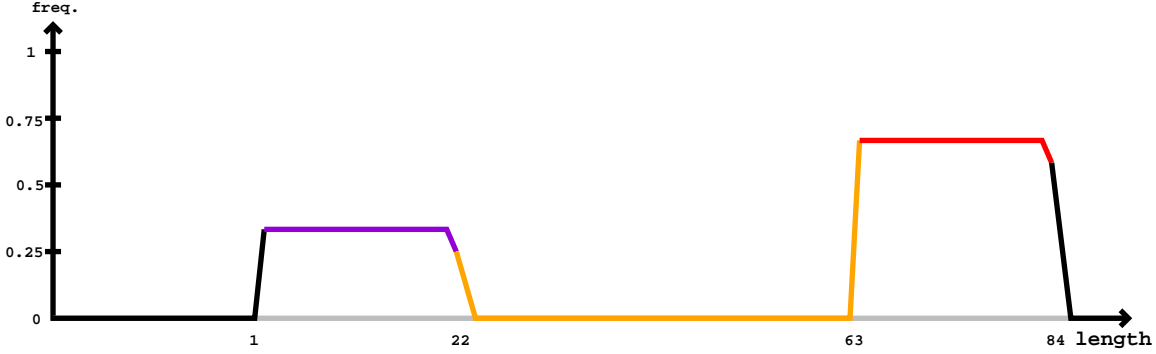

**Star**

**Mature**

| 5'                                                                                                              | -3' | obs | exp | reads | mm | sample |
|-----------------------------------------------------------------------------------------------------------------|-----|-----|-----|-------|----|--------|
| uagaacaagagggugagaaauaucugucgacucauUCAUCCAaacacacugguaaaaacaagagaucuaaacacagugacugugugaugaugcgggagaguuuuucgu    |     |     |     |       |    |        |
| .....(.(((((((((((((((((((((((((((((((((((((((((((((((((((((((((((((((((((((((((((((((((((((((((((((((((((((((( |     |     |     |       |    |        |
| .....aucugucgacucauUCAUCCA.....                                                                                 |     |     |     | 1     | 0  | S03    |
| .....aucugucgacucauUCAUCCA.....                                                                                 |     |     |     | 2     | 0  | S03    |
| .....aucugucgacucauUCAUCCA.....                                                                                 |     |     |     | 1     | 1  | S03    |
| .....ugugaaugaugcgggagagu.....                                                                                  |     |     |     | 2     | 0  | S03    |
| .....ugugaaugaugcgggagauA.....                                                                                  |     |     |     | 1     | 1  | S04    |
| .....ugugaaugaugcgggagaugC.....                                                                                 |     |     |     | 1     | 1  | S04    |
| .....ugugaaugaugcgggagagu.....                                                                                  |     |     |     | 2     | 0  | S04    |
| .....ugCgaaugaugcgggagagu.....                                                                                  |     |     |     | 1     | 1  | S04    |
| .....ugugaaugaugcgggagaguuu.....                                                                                |     |     |     | 1     | 0  | S04    |

Provisional ID : chrC04\_1566315  
 Score total : 2.2  
 Score for star read(s) : 3.9  
 Score for read counts : 5.2  
 Score for mfe : -6.9  
 Score for randfold : 0  
 Score for cons. seed :  
 Total read count : 22  
 Mature read count : 20  
 Loop read count : 1  
 Star read count : 1

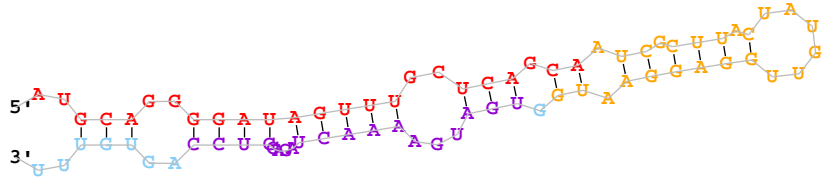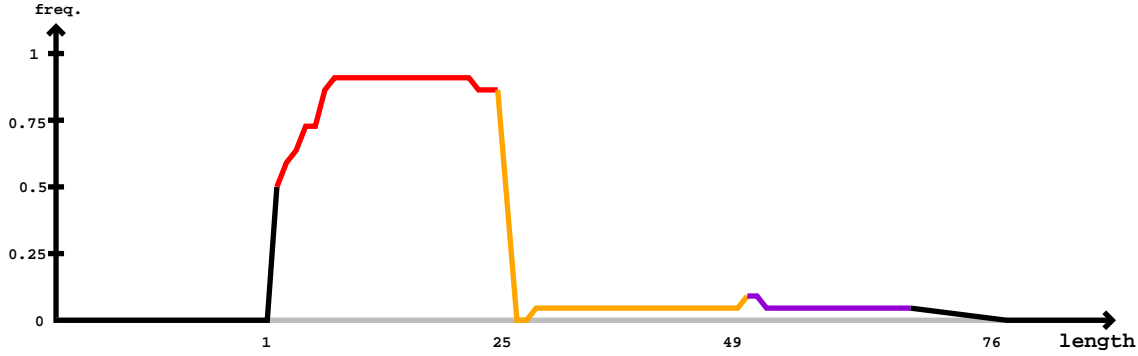

**Mature**

**Star**

| 5' -                                                                                                                                                          | reads | obs | mm | sample |
|---------------------------------------------------------------------------------------------------------------------------------------------------------------|-------|-----|----|--------|
| uuaauuauugguaaaaaaugg <u>aucaggggauagu</u> uugcucagca <u>aucgc</u> uuacuau <u>ugggaaugg</u> u <u>guga</u> gaaa <u>cuagagg</u> uccaguguuuguaacagcuuuu          | 6     | 1   | 1  | S03    |
| uuaauuauugguaaaaaaugg <u>aucaggggauagu</u> uugcucagca <u>aucgc</u> uuacuau <u>ugggaaugg</u> u <u>guga</u> gaaa <u>cuagagg</u> uccaguguuu <u>gua</u> acagcuuuu | 1     | 1   | 1  | S03    |
| .....(.(((....(((.....(((.....(((.....))).....)).....)).....)).....)).....)).....)).....)).....)                                                              | 1     | 1   | 1  | S03    |
| ..... <u>aucaggggauagu</u> Gugcucagca.....                                                                                                                    | 1     | 1   | 1  | S03    |
| ..... <u>ugcaggggauagu</u> Gugcucagca.....                                                                                                                    | 1     | 1   | 1  | S03    |
| ..... <u>gcaggggauagu</u> Gugcucagca.....                                                                                                                     | 1     | 1   | 1  | S03    |
| ..... <u>caggggauagu</u> Gugcucagca.....                                                                                                                      | 1     | 1   | 1  | S03    |
| ..... <u>caggggauagu</u> Gugcucagca.....                                                                                                                      | 1     | 1   | 1  | S03    |
| ..... <u>ggggauagu</u> Gugcucagca.....                                                                                                                        | 1     | 1   | 1  | S03    |
| ..... <u>Acuuacu</u> au <u>ugggaaugg</u> u.....                                                                                                               | 1     | 1   | 1  | S03    |
| ..... <u>ugaug</u> aaaa <u>cuagagg</u> uc.....                                                                                                                | 1     | 1   | 1  | S03    |
| ..... <u>aucaggggauagu</u> Gugcucagca.....                                                                                                                    | 5     | 1   | 1  | S04    |
| ..... <u>ugcaggggauagu</u> A <u>ug</u> cuca.....                                                                                                              | 1     | 1   | 1  | S04    |
| ..... <u>ggggauagu</u> Gugcucagca.....                                                                                                                        | 2     | 1   | 1  | S04    |
| ..... <u>gggauagu</u> Gugcucagca.....                                                                                                                         | 1     | 1   | 1  | S04    |

Provisional ID : chrC04\_1569843  
 Score total : 0.2  
 Score for star read(s) : 3.9  
 Score for read counts : -4.9  
 Score for mfe : 1.3  
 Score for randfold : 0  
 Score for cons. seed :  
 Total read count : 2  
 Mature read count : 1  
 Loop read count : 0  
 Star read count : 1

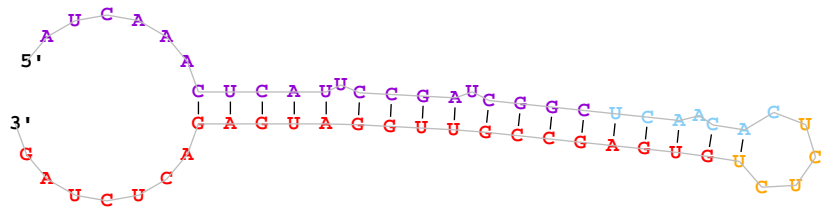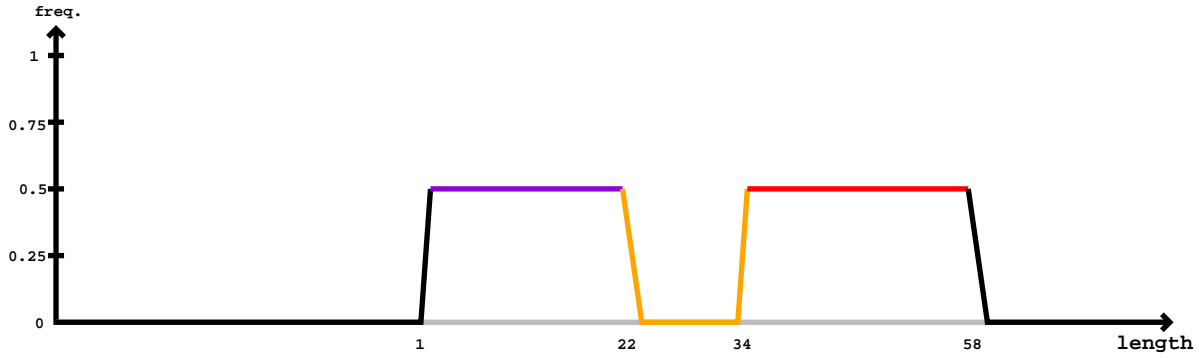

**Star**

**Mature**

| 5'                                    | Star                 | Mature                                | -3'                   | obs | exp | reads | mm | sample |
|---------------------------------------|----------------------|---------------------------------------|-----------------------|-----|-----|-------|----|--------|
| cgccgcccgaacacuccccgacaucagcgcgcgagaa | aucaaacucauuccgaucgg | ucaaacacucucugugagccguuggaugagacucuag | gccacucuuaucugcuacguc | 1   | 1   | 1     | 1  | S03    |
| cgccgcccgaacacuccccgacaucagcgcgcgagaa | aucaaacucauuccgaucgg | ucaaacacucucugugagccguuggaugagacucuag | gccacucuuaucugcuacguc | 1   | 0   | 1     | 0  | S03    |

Provisional ID : chrC04\_1570307  
 Score total : 3.9  
 Score for star read(s) : 3.9  
 Score for read counts : 18  
 Score for mfe : -17.8  
 Score for randfold : 0  
 Score for cons. seed :  
 Total read count : 47  
 Mature read count : 46  
 Loop read count : 0  
 Star read count : 1

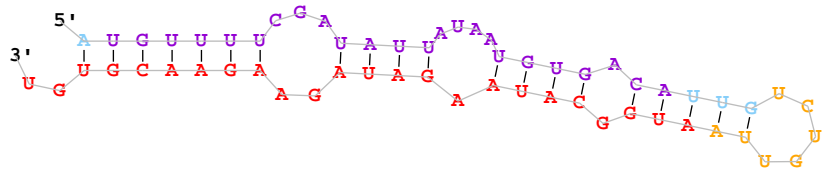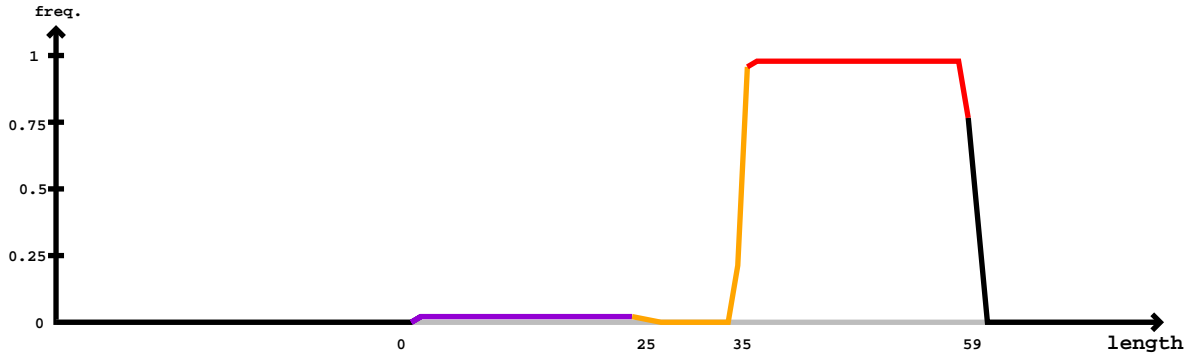

Star
Mature

|                                                                                                                                                                                                                                                                                                                                                                                                                                                                                             |                                                                                                                                                                                |
|---------------------------------------------------------------------------------------------------------------------------------------------------------------------------------------------------------------------------------------------------------------------------------------------------------------------------------------------------------------------------------------------------------------------------------------------------------------------------------------------|--------------------------------------------------------------------------------------------------------------------------------------------------------------------------------|
| 5' - uuuaauuaugguaauaucaguaauauggaauuuu <u>uguuuucgauuuuaaugugacauuguguuuauggcauaagauagaagaacgugu</u> uaagauuuuuaguuuug<br>uuuaauuaugguaauaucaguaauauggaauuuu <u>uguuuucgauuuuaaugugacauugucguuuauggcauaagauagaagaacgugu</u> uaagauuuuuaguuuug<br>.....((((((((((((.....)))))))).((((((((.....)))))))).((((((((.....)))))))).((((((((.....)))))))).((((((((.....)))))))).<br>.....aauggcauaagauagaagaacgug.....<br>.....auggcauaagauagaagaacgugA.....<br>.....auggcauaagauagaagaacgugu..... | -3' obs<br>exp<br><br>reads mm sample<br>2 0 S03<br>1 1 S03<br>7 0 S03<br><br>1 1 S04<br>4 1 S04<br>4 0 S04<br>1 1 S04<br>2 1 S04<br>1 1 S04<br>5 1 S04<br>18 0 S04<br>1 1 S04 |
|---------------------------------------------------------------------------------------------------------------------------------------------------------------------------------------------------------------------------------------------------------------------------------------------------------------------------------------------------------------------------------------------------------------------------------------------------------------------------------------------|--------------------------------------------------------------------------------------------------------------------------------------------------------------------------------|

Provisional ID : chrC04\_1571022  
 Score total : 0  
 Score for star read(s) : -1.3  
 Score for read counts : -0.3  
 Score for mfe : 1.7  
 Score for randfold : 0  
 Score for cons. seed :  
 Total read count : 11  
 Mature read count : 11  
 Loop read count : 0  
 Star read count : 0

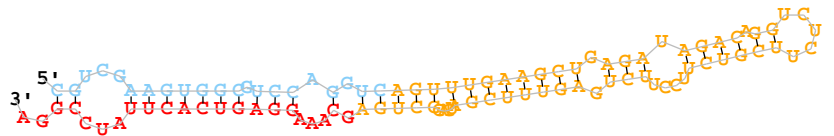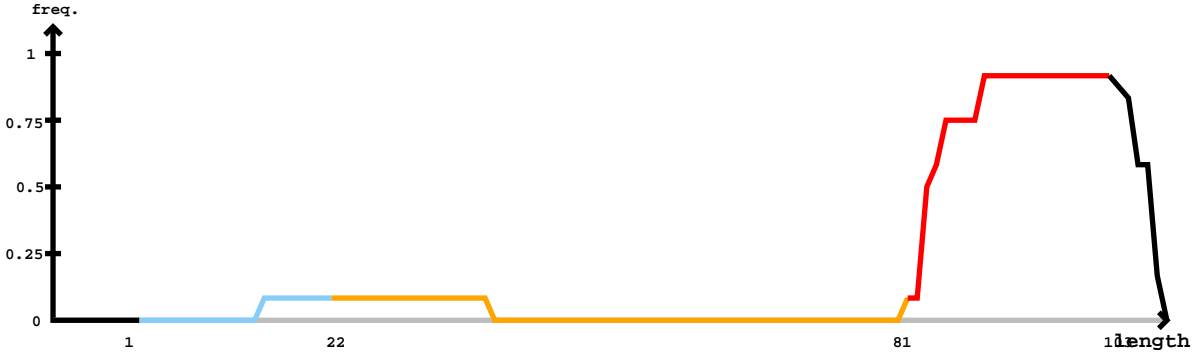

**Star**

**Mature**

| 5'          |                                                                                                                              | -3'                                                         | exp                       | sample |
|-------------|------------------------------------------------------------------------------------------------------------------------------|-------------------------------------------------------------|---------------------------|--------|
| 5'- ucaaagc | cgucgaaguggcguccagguc                                                                                                        | aguuugaagcugagauagacaggucucuuucgucuuucgaguuucgaucaggcugagca | aaaggagucacuuauccggagccca | S03    |
|             | .....(((.....(((((((.....(((.....(((.....(((.....(((.....)))))).....)))))).....)))))).....)))))).....)))).....)).....))..... | .....aaaggagucacuuauccggagccU.                              | 1                         | 1      |
|             |                                                                                                                              | .....gucauuauccggagccc                                      | 1                         | 1      |
|             | .....uccaggucaguuugaagcugagau.....                                                                                           |                                                             | 1                         | 0      |
|             | .....gcaaaggagucacuuauccgga.....                                                                                             |                                                             | 1                         | 0      |
|             | .....aaaggagucacuuauccggagc...                                                                                               |                                                             | 1                         | 0      |
|             | .....Naaggagucacuuauccggagc...                                                                                               |                                                             | 1                         | 1      |
|             | .....aaaggagucacuuauccggagU...                                                                                               |                                                             | 1                         | 1      |
|             | .....aaaggagucacuuauccggagccc.                                                                                               |                                                             | 1                         | 0      |
|             | .....aaggagucacuuauccggagccc.                                                                                                |                                                             | 1                         | 0      |
|             | .....aggagucacuuauccggagccU.                                                                                                 |                                                             | 1                         | 1      |
|             | .....aggagucacuuauccggagccc.                                                                                                 |                                                             | 1                         | 0      |
|             | .....gucauuauccggagccca                                                                                                      |                                                             | 1                         | 0      |



Provisional ID : chrC04\_1580937  
 Score total : 0.1  
 Score for star read(s) : -1.3  
 Score for read counts : 0  
 Score for mfe : 1.4  
 Score for randfold : 0  
 Score for cons. seed :  
 Total read count : 12  
 Mature read count : 12  
 Loop read count : 0  
 Star read count : 0

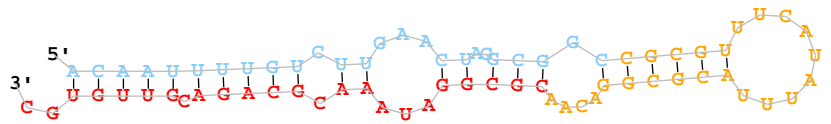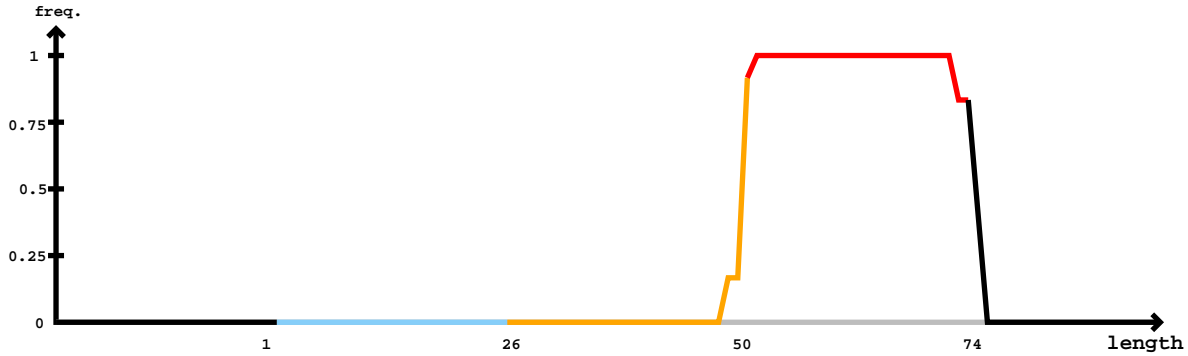

**Star**

**Mature**

| 5' | Star                   | Mature                     | 3'                      | exp                       | reads               | mm  | sample |
|----|------------------------|----------------------------|-------------------------|---------------------------|---------------------|-----|--------|
| 5' | gaacagagaaacgguaagcccc | acaaauuuugucuugaacuaggcggc | cgcguuucauuuuacgggacaac | cgcggaauaaacgcagacguugugc | gguccaccgauuugaauca | -3' |        |
|    | .....                  | .....                      | .....                   | .....                     | 1                   | 0   | S03    |
|    | .....                  | .....                      | .....                   | .....                     | 1                   | 0   | S03    |
|    | .....                  | .....                      | .....                   | .....                     | 1                   | 0   | S04    |
|    | .....                  | .....                      | .....                   | .....                     | 3                   | 1   | S04    |
|    | .....                  | .....                      | .....                   | .....                     | 1                   | 1   | S04    |
|    | .....                  | .....                      | .....                   | .....                     | 4                   | 0   | S04    |
|    | .....                  | .....                      | .....                   | .....                     | 1                   | 0   | S04    |

```

Provisional ID    : chrC04_1587116
Score total       : 0.5
Score for star read(s) : -1.3
Score for read counts : 0
Score for mfe     : 1.8
Score for randfold : 0
Score for cons. seed :
Total read count  : 130
Mature read count : 126
Loop read count   : 4
Star read count   : 0
  
```

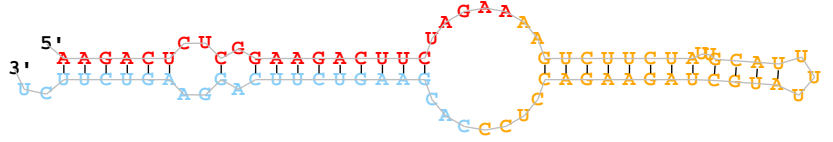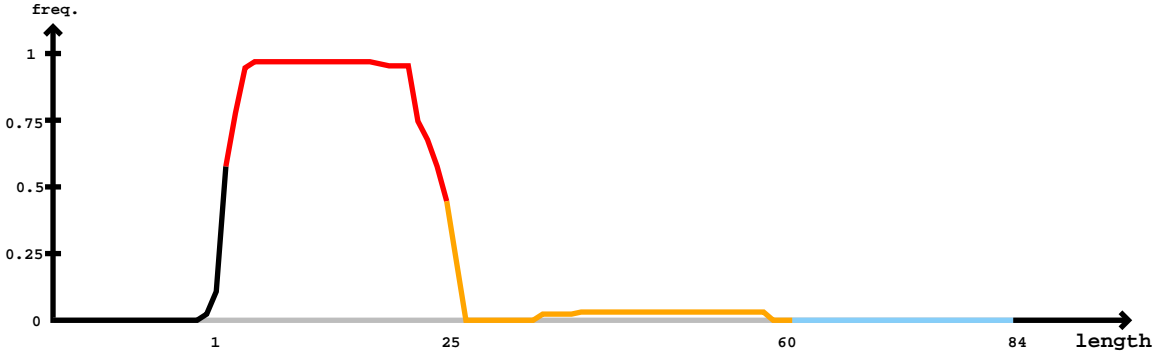

| Mature          |                                                                                   |                                                             | Star        |    |        |  |  |  |  |
|-----------------|-----------------------------------------------------------------------------------|-------------------------------------------------------------|-------------|----|--------|--|--|--|--|
| 5'              |                                                                                   | -3'                                                         | reads       | mm | sample |  |  |  |  |
| uugaaagacucuuag | aagacucucggaaagacucucua                                                           | aaagucuuuauugcauuuuauugcuagaagaccucacgaagucucucaggaagucucua | agucccaaagu |    |        |  |  |  |  |
| .....           | (((.....(((.....(((.....(((.....(((.....(((.....(((.....))))))))))))))))))))..... | .....                                                       |             |    |        |  |  |  |  |
| .....           | agaagacucucggaaUacuucuag.....                                                     | .....                                                       | 1           | 1  | S03    |  |  |  |  |
| .....           | gaagacucucggaaUacuucuag.....                                                      | .....                                                       | 1           | 1  | S03    |  |  |  |  |
| .....           | gaagacucucggaaagacucucua.....                                                     | .....                                                       | 1           | 1  | S03    |  |  |  |  |
| .....           | gaagacucucggaaagacucucua.....                                                     | .....                                                       | 1           | 0  | S03    |  |  |  |  |
| .....           | gaagacucucggaaUacuucuaga.....                                                     | .....                                                       | 5           | 1  | S03    |  |  |  |  |
| .....           | aagacucucggaaagacucucu.....                                                       | .....                                                       | 2           | 0  | S03    |  |  |  |  |
| .....           | aagacucucggaaUacuucuua.....                                                       | .....                                                       | 1           | 1  | S03    |  |  |  |  |
| .....           | aagacucucggaaUacuucuag.....                                                       | .....                                                       | 4           | 1  | S03    |  |  |  |  |
| .....           | aagacucucggaaagacucucua.....                                                      | .....                                                       | 1           | 0  | S03    |  |  |  |  |
| .....           | aagacucucggaaagacucucua.....                                                      | .....                                                       | 26          | 1  | S03    |  |  |  |  |
| .....           | agacucucggaaagacucucu.....                                                        | .....                                                       | 3           | 0  | S03    |  |  |  |  |
| .....           | agacucucggaaUacuucuag.....                                                        | .....                                                       | 3           | 1  | S03    |  |  |  |  |
| .....           | agacucucggaaUacuucuaga.....                                                       | .....                                                       | 7           | 1  | S03    |  |  |  |  |
| .....           | agacucucggaaagacucucua.....                                                       | .....                                                       | 6           | 1  | S03    |  |  |  |  |
| .....           | gacucucggaaagacucucu.....                                                         | .....                                                       | 8           | 0  | S03    |  |  |  |  |
| .....           | gacucucggaaagacucucu.....                                                         | .....                                                       | 1           | 1  | S03    |  |  |  |  |
| .....           | gacucucggaaUacuucuaga.....                                                        | .....                                                       | 1           | 1  | S03    |  |  |  |  |
| .....           | acucucggaaagacucucu.....                                                          | .....                                                       | 1           | 1  | S03    |  |  |  |  |
| .....           | aAugcauuuauugcuagaagaccu.....                                                     | .....                                                       | 2           | 1  | S03    |  |  |  |  |
| .....           | agaagacucucggaaagac.....                                                          | .....                                                       | 1           | 0  | S04    |  |  |  |  |
| .....           | agaagacucucggaaagacu.....                                                         | .....                                                       | 1           | 0  | S04    |  |  |  |  |
| .....           | gaagacucucggaaUacuucuua.....                                                      | .....                                                       | 1           | 1  | S04    |  |  |  |  |
| .....           | gaagacucucggaaUacuucuag.....                                                      | .....                                                       | 1           | 1  | S04    |  |  |  |  |
| .....           | gaagacucucggaaUacuucuaga.....                                                     | .....                                                       | 1           | 1  | S04    |  |  |  |  |
| .....           | aagacucucggaaagacucucu.....                                                       | .....                                                       | 4           | 0  | S04    |  |  |  |  |
| .....           | aagacucucggaaagacucucu.....                                                       | .....                                                       | 2           | 0  | S04    |  |  |  |  |
| .....           | aagacucucggaaagacucucu.....                                                       | .....                                                       | 20          | 1  | S04    |  |  |  |  |
| .....           | aagacucucggaaagacucucuaga.....                                                    | .....                                                       | 1           | 1  | S04    |  |  |  |  |
| .....           | agacucucggaaagacucucu.....                                                        | .....                                                       | 1           | 0  | S04    |  |  |  |  |
| .....           | agacucucggaaagacucucu.....                                                        | .....                                                       | 1           | 0  | S04    |  |  |  |  |
| .....           | agacucucgUaagacucucua.....                                                        | .....                                                       | 1           | 1  | S04    |  |  |  |  |
| .....           | agacucucggaaagacucucuaga.....                                                     | .....                                                       | 1           | 0  | S04    |  |  |  |  |
| .....           | agacucucggaaagacucucu.....                                                        | .....                                                       | 2           | 1  | S04    |  |  |  |  |

**Mature**

**Star**

|                                                                                                                                              |    |   |     |
|----------------------------------------------------------------------------------------------------------------------------------------------|----|---|-----|
| uugaagacuucuua <b>gagacucucggaagacuucua</b> gaaaguc <u>uuc</u> auugcauuuuauugcuagaagaccuccacgaaguc <u>uc</u> caggaaguc <u>uc</u> agucccaaagu |    |   |     |
| .....agacucucggaagacuuc <u>Ugaaa</u> .....                                                                                                   | 1  | 1 | S04 |
| .....gacucucggaagacuuc <u>u</u> .....                                                                                                        | 10 | 0 | S04 |
| .....gacucucggaagacuuc <u>ua</u> .....                                                                                                       | 1  | 0 | S04 |
| .....gacucucggaagacuuc <u>Ugaa</u> .....                                                                                                     | 1  | 1 | S04 |
| .....acucucggaagacuuc <u>ua</u> .....                                                                                                        | 2  | 0 | S04 |
| .....a <u>Aug</u> cauuuuauugcuagaagacc <u>u</u> .....                                                                                        | 1  | 1 | S04 |
| .....cauuuuauugcuagaagacc <u>u</u> .....                                                                                                     | 1  | 0 | S04 |



Provisional ID : chrC04\_1602818  
 Score total : 0.8  
 Score for star read(s) : -1.3  
 Score for read counts : 0  
 Score for mfe : 2.1  
 Score for randfold : 0  
 Score for cons. seed :  
 Total read count : 27  
 Mature read count : 25  
 Loop read count : 1  
 Star read count : 1

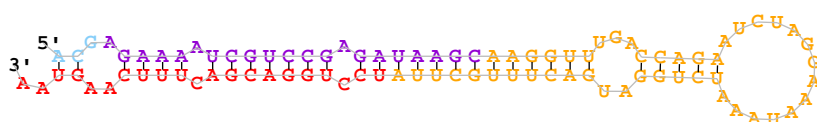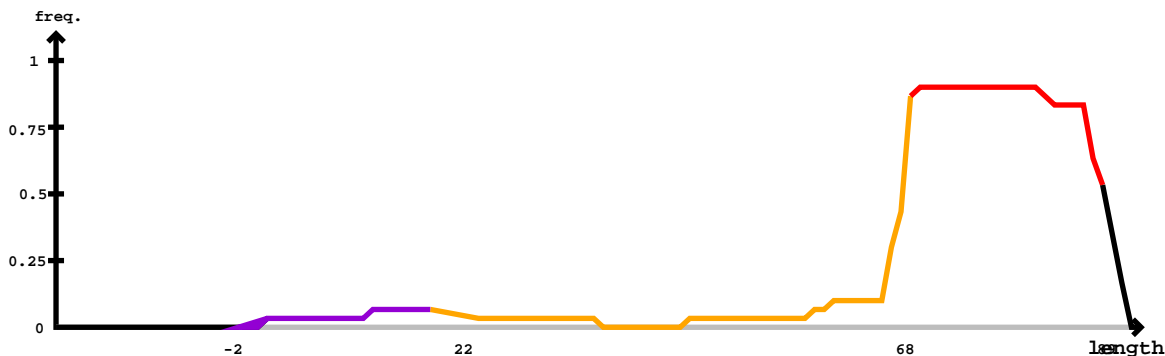

**Star**

**Mature**

| 5' | Star                                                                                          | Mature                                            | -3'                     | obs | mm    | sample |        |
|----|-----------------------------------------------------------------------------------------------|---------------------------------------------------|-------------------------|-----|-------|--------|--------|
| 5' | guccagguagacgacuuacgagaaaaucgucgagauaagc                                                      | caagguuugaccagaaucuaaggaauaaaucuggaugacuuugcuua   | uccuggacgacuucaaguaaguc | -3' | reads | mm     | sample |
|    | guccagguagacgacuuacgagaaaaucgucgagaua                                                         | agcaagguuugaccagaaucuaaggaauaaaucuggaugacuuugcuua | uccuggacgacuucaaguaaguc | exp |       |        |        |
|    | .....(((((((.....(((((((.....(((((((.....(((((((.....)))))))))))))))))))))))))))))))))))))))) |                                                   |                         |     |       |        |        |
|    | .....agaaaaucgucgagauaagc.....                                                                | .....acuuugcuuaucuggacgacuucaagA.....             |                         | 1   | 0     | S03    |        |
|    |                                                                                               | .....uaucuggacgacuucaagA.....                     |                         | 1   | 1     | S03    |        |
|    |                                                                                               | .....uaucuggacgacuucaagG.....                     |                         | 1   | 1     | S03    |        |
|    |                                                                                               | .....uaucuggacgacuucaagu.....                     |                         | 3   | 0     | S03    |        |
|    |                                                                                               | .....aucuggacgacuucaagua.....                     |                         | 1   | 0     | S03    |        |
|    |                                                                                               | .....aucAuggacgacuucaaguaagu.....                 |                         | 1   | 1     | S03    |        |
|    |                                                                                               | .....aucuggacgacuucaaguaagu.....                  |                         | 1   | 0     | S03    |        |
|    |                                                                                               | .....uccuggacgacuucaagua.....                     |                         | 1   | 0     | S03    |        |
|    |                                                                                               | .....uccuggacgacuucaaguaa.....                    |                         | 6   | 0     | S03    |        |
|    |                                                                                               | .....uccuggacgacuucaaguaUg.....                   |                         | 1   | 1     | S03    |        |
|    |                                                                                               | .....uccuggacgacuucaaguaaU.....                   |                         | 1   | 1     | S03    |        |
|    |                                                                                               | .....uccuggacgacuucaaguaag.....                   |                         | 2   | 0     | S03    |        |
|    |                                                                                               | .....uccuggacgacuucaaguaagA.....                  |                         | 1   | 1     | S03    |        |
|    |                                                                                               | .....ccuggacgacuucaaguaagu.....                   |                         | 1   | 0     | S03    |        |
|    |                                                                                               | .....cgGgauaagcaagguuugaccaga.....                |                         | 1   | 1     | S04    |        |
|    |                                                                                               | .....auaaaucuggaugacuuugcuua.....                 |                         | 1   | 0     | S04    |        |
|    |                                                                                               | .....uuugcuuaucuggacgacuuU.....                   |                         | 1   | 1     | S04    |        |
|    |                                                                                               | .....uaucuggacgacuucaagu.....                     |                         | 1   | 0     | S04    |        |
|    |                                                                                               | .....aucuggacgacuucaagua.....                     |                         | 1   | 0     | S04    |        |
|    |                                                                                               | .....uccuggacgacuucaaguaa.....                    |                         | 1   | 0     | S04    |        |
|    |                                                                                               | .....ccuggacgacuucaaCuaagu.....                   |                         | 1   | 1     | S04    |        |



# Mature

# Star

|                                                                                                                 |   |   |     |
|-----------------------------------------------------------------------------------------------------------------|---|---|-----|
| cgauaggcauuccgacggaauuccgacgaccuaacggucauauccguuggaauuucgucgguauuuuccuaucucaacggcuauaaaacgaucauuguaauuugcggcaau |   |   |     |
| .....cgacggaauuccgacgacc.....                                                                                   | 1 | 0 | S04 |
| .....gaUggaauuccgacgacc.....                                                                                    | 1 | 1 | S04 |
| .....gaauuucgucgguauAuuccu.....                                                                                 | 1 | 1 | S04 |
| .....cuaCcucaacggcuauaaaacga.....                                                                               | 1 | 1 | S04 |

Provisional ID : chrC04\_1627871  
 Score total : 0.9  
 Score for star read(s) : -1.3  
 Score for read counts : 0  
 Score for mfe : 2.2  
 Score for randfold : 0  
 Score for cons. seed :  
 Total read count : 31  
 Mature read count : 25  
 Loop read count : 6  
 Star read count : 0

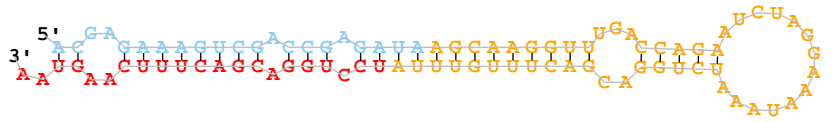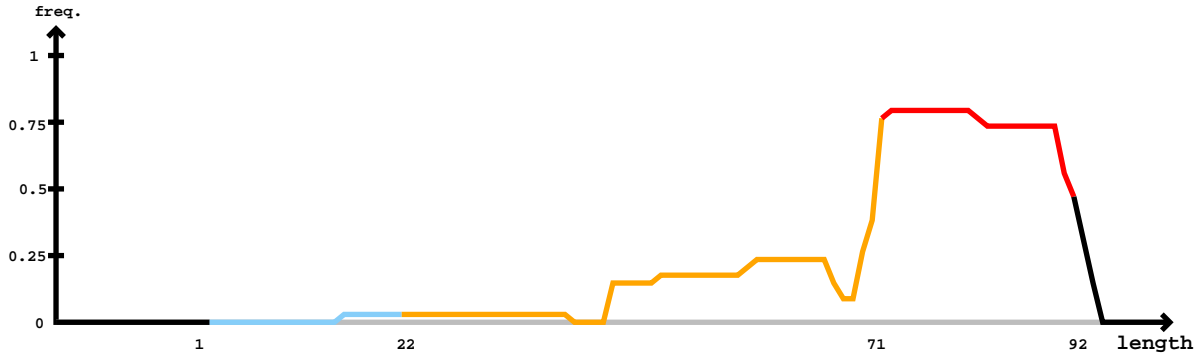

**Star**

**Mature**

| 5'                                                                                                                  | reads | exp | mm | sample |
|---------------------------------------------------------------------------------------------------------------------|-------|-----|----|--------|
| cagguagacgacuuacgagaaaagucgacccgagauagcaagguuugaccagaaucuaaggaaaauaauucuggacgacuuuuuauccuggacgacuuucaaguaagucggacga |       |     |    |        |
| .....aggaauuaauucuggacgacuuA.....                                                                                   | 1     | 1   | 1  | S03    |
| .....uaucuggacgacuuucaagu.....                                                                                      | 3     | 0   | 0  | S03    |
| .....uaucuggacgacuuucaagA.....                                                                                      | 1     | 1   | 1  | S03    |
| .....uaucuggacgacuuucaagG.....                                                                                      | 1     | 1   | 1  | S03    |
| .....aucuggacgacuuucaagua.....                                                                                      | 1     | 0   | 0  | S03    |
| .....aucuggacgacuuucaaguaagu.....                                                                                   | 1     | 1   | 1  | S03    |
| .....aucuggacgacuuucaaguaagu.....                                                                                   | 1     | 0   | 0  | S03    |
| .....uccuggacgacuuucaagua.....                                                                                      | 1     | 0   | 0  | S03    |
| .....uccuggacgacuuucaaguaa.....                                                                                     | 6     | 0   | 0  | S03    |
| .....uccuggacgacuuucaaguaU.....                                                                                     | 1     | 1   | 1  | S03    |
| .....uccuggacgacuuucaaguaUg.....                                                                                    | 1     | 1   | 1  | S03    |
| .....uccuggacgacuuucaaguaag.....                                                                                    | 2     | 0   | 0  | S03    |
| .....uccuggacgacuuucaaguaagA.....                                                                                   | 1     | 1   | 1  | S03    |
| .....ccuggacgacuuucaaguaagu.....                                                                                    | 1     | 0   | 0  | S03    |
| .....cgGgauaagcaagguuugaccaga.....                                                                                  | 1     | 1   | 1  | S04    |
| .....aggaaaauaauucuggGcgacuuu.....                                                                                  | 1     | 1   | 1  | S04    |
| .....aggaaaauaauucuggacgacuuG.....                                                                                  | 1     | 1   | 1  | S04    |
| .....aggaaaauaauucuggacgacuuu.....                                                                                  | 1     | 0   | 0  | S04    |
| .....aggaaaauaauucuggacgacuuug.....                                                                                 | 1     | 0   | 0  | S04    |
| .....auaaauucuggacgacuuuguuuau.....                                                                                 | 1     | 0   | 0  | S04    |
| .....gacgacuuuguuuauccuggacga.....                                                                                  | 1     | 0   | 0  | S04    |
| .....acgacuuuguuuauccuggacgaU.....                                                                                  | 1     | 1   | 1  | S04    |
| .....uaucuggacgacuuucaagu.....                                                                                      | 1     | 0   | 0  | S04    |
| .....aucuggacgacuuucaagua.....                                                                                      | 1     | 0   | 0  | S04    |
| .....uccuggacgacuuucaaguaa.....                                                                                     | 1     | 0   | 0  | S04    |
| .....ccuggacgacuuucaaaCuaagu.....                                                                                   | 1     | 1   | 1  | S04    |





Provisional ID : chrC04\_1645854  
 Score total : 6  
 Score for star read(s) : 3.9  
 Score for read counts : 3.2  
 Score for mfe : -1  
 Score for randfold : 0  
 Score for cons. seed :  
 Total read count : 18  
 Mature read count : 15  
 Loop read count : 1  
 Star read count : 2

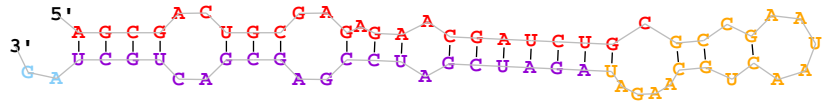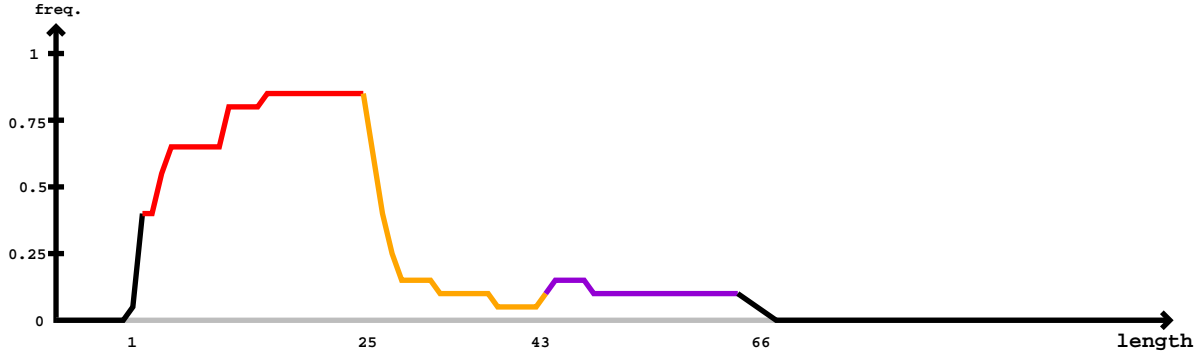

**Mature**

**Star**

| 5'    |                                                                      |                                                                | -3' | obs   |    |        |
|-------|----------------------------------------------------------------------|----------------------------------------------------------------|-----|-------|----|--------|
|       |                                                                      |                                                                | exp | reads | mm | sample |
| 5'    | ugaucugagcgacugcgagagaaacgaucugcgccgaauaacugcaagau                   | agaucgaucgagcgacugcuagagagcgaucaacgccgaguaaacugcgagagcgagacgaa | -3' |       |    |        |
|       | ugaucugagcgacugcgagagaaacgaucugcgccgaauaacugcaagau                   | agaucgaucgagcgacugcuagagagcgaucaacgccgaguaaacugcgagagcgagacgaa |     |       |    |        |
|       | ...(((.....(((.....(((.....(((.....(((.....))))))))).....))))))..... |                                                                |     |       |    |        |
|       | .....agcgacugcgUgagaacgaucugc.....                                   |                                                                |     | 1     | 1  | S03    |
|       | .....agcgacugcgagagaaacgaucugU.....                                  |                                                                |     | 1     | 1  | S03    |
|       | .....cgacugcgagagaaacgaucugcgc.....                                  |                                                                |     | 1     | 0  | S03    |
|       | .....gacugcgagagaaacgaucugcg.....                                    |                                                                |     | 1     | 0  | S03    |
|       | .....cgccgaauaacugcaagauagauc.....                                   |                                                                |     | 1     | 0  | S03    |
|       | .....gaucgaucgagcgacugcAa.....                                       |                                                                |     | 1     | 1  | S03    |
| ..... |                                                                      |                                                                |     |       |    |        |
|       | .....gagcgacugcgagagaaacgaucug.....                                  |                                                                |     | 1     | 0  | S04    |
|       | .....agcgacugcgagagaaacgaucugc.....                                  |                                                                |     | 2     | 0  | S04    |
|       | .....agcgacugcgagagaaacgaucugG.....                                  |                                                                |     | 1     | 1  | S04    |
|       | .....agcgacugcgagagaaacgaucUg.....                                   |                                                                |     | 1     | 1  | S04    |
|       | .....agcgacugcgagagaaacgaucugU.....                                  |                                                                |     | 1     | 1  | S04    |
|       | .....cgacugcgagagaaacgaucugcGA.....                                  |                                                                |     | 1     | 1  | S04    |
|       | .....cgacugcgagagaaacgaucugcgc.....                                  |                                                                |     | 1     | 0  | S04    |
|       | .....gacugcgagagaaacgaucugc.....                                     |                                                                |     | 1     | 0  | S04    |
|       | .....gagagaaacgaucugcgc.....                                         |                                                                |     | 2     | 0  | S04    |
|       | .....gagagaaUgaucugcgccgaau.....                                     |                                                                |     | 1     | 1  | S04    |
|       | .....gaaacgaucugcgccgaauaacugc.....                                  |                                                                |     | 1     | 0  | S04    |
|       | .....agaucgaucgagcgacugcA.....                                       |                                                                |     | 1     | 1  | S04    |







Star

Mature

|                                                                                                                 |   |   |     |
|-----------------------------------------------------------------------------------------------------------------|---|---|-----|
| uaauggcuguaguuuaaaaauuuacugugagaaaaaacuguaaacuuuugaugugacuuuagauuuuuuugcugugagaauuuuuuugaaagcacuaaaaaauugcuuugg |   |   |     |
| .....gauuuuGuugcugugagaauuuua.....                                                                              | 1 | 1 | S04 |
| .....Uuuuuuugcugugagaauuuuug.....                                                                               | 1 | 1 | S04 |
| .....uuuuuugcugugagaauuuuuu.....                                                                                | 1 | 0 | S04 |
| .....uuuuuugcugugagaauuuuug.....                                                                                | 3 | 0 | S04 |
| .....uuuuuugcugugagaauuuuugg.....                                                                               | 3 | 0 | S04 |
| .....uuuuuugcugugagaauuuua.....                                                                                 | 1 | 0 | S04 |
| .....uuuuuugcugugagaauuuuugg.....                                                                               | 1 | 0 | S04 |
| .....uuuuuugcugugagaauuuuuggG.....                                                                              | 1 | 1 | S04 |
| .....uuuugcugugagaauuuuuggaa.....                                                                               | 1 | 0 | S04 |
| .....uuuugGugugagaauuuuuggaaa.....                                                                              | 1 | 1 | S04 |
| .....auugcugugagaauuuuUugg.....                                                                                 | 1 | 1 | S04 |
| .....auugcugugagaauuuuuggaaag.....                                                                              | 7 | 0 | S04 |
| .....uugcugugagaauuuuuggaa.....                                                                                 | 1 | 0 | S04 |
| .....uugcugugagaauuuuGuggaaagc.....                                                                             | 1 | 1 | S04 |
| .....uugcugugagaauuuuuggaaagc.....                                                                              | 1 | 0 | S04 |
| .....ugcugugagaauuuuugg.....                                                                                    | 1 | 0 | S04 |
| .....ugcugugagaauuuuuggaaagc.....                                                                               | 1 | 0 | S04 |
| .....cugugagaauuuuuggaaagcacu.....                                                                              | 2 | 0 | S04 |
| .....uguagaauuuuuggaaagcacu.....                                                                                | 1 | 0 | S04 |







Provisional ID : chrC04\_1697252  
 Score total : 277.2  
 Score for star read(s) : 3.9  
 Score for read counts : 282.1  
 Score for mfe : -8.7  
 Score for randfold : 0  
 Score for cons. seed :  
 Total read count : 565  
 Mature read count : 351  
 Loop read count : 0  
 Star read count : 214

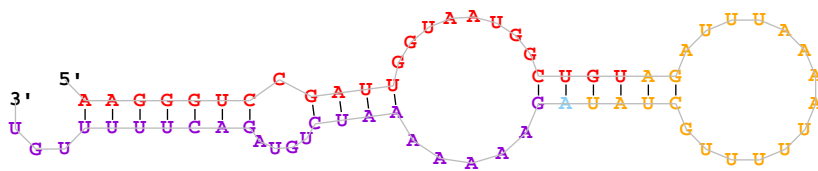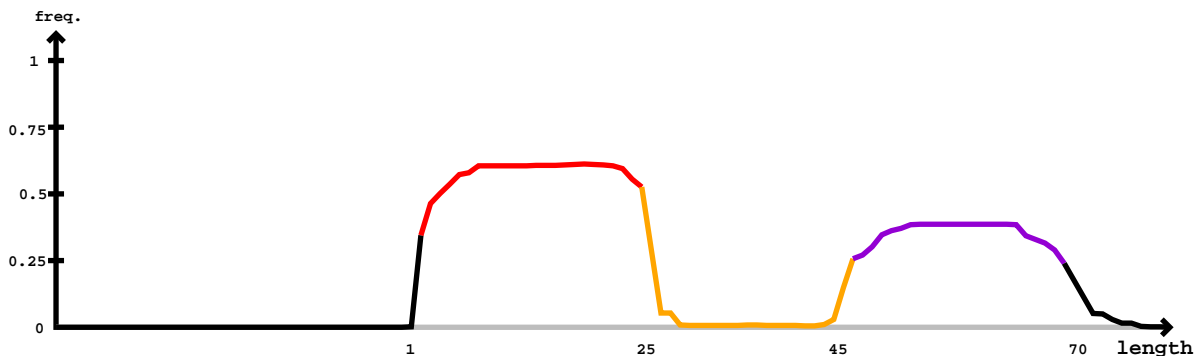

**Mature**

**Star**

| 5'                                            | 3'                                         | obs                           | exp | reads | mm | sample |
|-----------------------------------------------|--------------------------------------------|-------------------------------|-----|-------|----|--------|
| uuaauuugaaaauguaaaaaaccauaacuaaaca            | aaggguccgauugguaauggcuguagauuuuuuuuuugcuua | gaaaaaaucugugacuuuuuugugacuuu | -3' |       |    |        |
| uuaauuugaaaauguaaaaaaccauaacuaaaca            | aaggguccgauugguaauggcuguagauuuuuuuuuugcuua | gaaaaaaucugugacuuuuuugugacuuu |     |       |    |        |
| .....((((((((((((((((.....))))))))))))))..... |                                            |                               |     |       |    |        |
| .....aaGggguccgauugguaaugg.....               |                                            | 1                             | 1   | 1     | 1  | S03    |
| .....aaggguccgauugguaau.....                  |                                            | 1                             | 0   | 1     | 0  | S03    |
| .....aaggguccgauugguaaugg.....                |                                            | 1                             | 0   | 1     | 0  | S03    |
| .....aaggguccgauugguaauggA.....               |                                            | 1                             | 1   | 1     | 1  | S03    |
| .....aaggguccgauugguaauggc.....               |                                            | 5                             | 0   | 1     | 0  | S03    |
| .....aaggguccgauugguaauggcC.....              |                                            | 1                             | 1   | 1     | 1  | S03    |
| .....aaggguccgauugguaauggcu.....              |                                            | 8                             | 0   | 1     | 0  | S03    |
| .....aaggguccgauugguaauggcA.....              |                                            | 1                             | 1   | 1     | 1  | S03    |
| .....aaggguccgauAguaauggcug.....              |                                            | 1                             | 1   | 1     | 1  | S03    |
| .....aaggguccgauugguaauggcug.....             |                                            | 11                            | 0   | 1     | 0  | S03    |
| .....aaggguccgauuggAaauggcugu.....            |                                            | 1                             | 1   | 1     | 1  | S03    |
| .....Naggguccgauugguaauggcugu.....            |                                            | 1                             | 1   | 1     | 1  | S03    |
| .....aaggguccgauugguaauggcugG.....            |                                            | 7                             | 1   | 1     | 1  | S03    |
| .....aaggguccgCuugguaauggcugu.....            |                                            | 1                             | 1   | 1     | 1  | S03    |
| .....aaggguccgauugguaauggcugu.....            |                                            | 133                           | 0   | 1     | 0  | S03    |
| .....Gaggguccgauugguaauggcugu.....            |                                            | 1                             | 1   | 1     | 1  | S03    |
| .....aaggguccgauCgguaauggcugu.....            |                                            | 1                             | 1   | 1     | 1  | S03    |
| .....aaggguccgauugguaauggcugA.....            |                                            | 7                             | 1   | 1     | 1  | S03    |
| .....aaggguccgauugguaauggcuguU.....           |                                            | 2                             | 1   | 1     | 1  | S03    |
| .....aaggguccgauugguaauggcugua.....           |                                            | 1                             | 0   | 1     | 0  | S03    |
| .....aggguccgauugguaauC.....                  |                                            | 1                             | 1   | 1     | 1  | S03    |
| .....aggguccgauugguaauggcu.....               |                                            | 7                             | 0   | 1     | 0  | S03    |
| .....aggguccgauugguaauggcA.....               |                                            | 1                             | 1   | 1     | 1  | S03    |
| .....aggguccgauugguaauggcug.....              |                                            | 2                             | 0   | 1     | 0  | S03    |
| .....aggguccgauugguaauggcugu.....             |                                            | 17                            | 0   | 1     | 0  | S03    |
| .....aggguccgauugguaauggcugG.....             |                                            | 3                             | 1   | 1     | 1  | S03    |
| .....aggguccgauuggCaauggcugua.....            |                                            | 1                             | 1   | 1     | 1  | S03    |
| .....aggguccgauugguaGuggcugua.....            |                                            | 1                             | 1   | 1     | 1  | S03    |
| .....aggguccgauugguaauggcuguG.....            |                                            | 2                             | 1   | 1     | 1  | S03    |
| .....aggguccgauugguaauggcugua.....            |                                            | 24                            | 0   | 1     | 0  | S03    |
| .....aggguccgaCugguaauggcugua.....            |                                            | 1                             | 1   | 1     | 1  | S03    |
| .....aggguccgauugguaauggcuguU.....            |                                            | 1                             | 1   | 1     | 1  | S03    |
| .....gggguccgauugguaauggcug.....              |                                            | 1                             | 0   | 1     | 0  | S03    |

Mature

Star

uuauuuugaaaaugauaaaaucacaaacauaacaaggguccggaugguaauggcuguaaguuuuuuuuugcuuaagaaaaaaucugugacuuuuuuugugacuuu

|                                    |    |   |     |
|------------------------------------|----|---|-----|
| .....ggguccggaugguaauggcugu.....   | 9  | 0 | S03 |
| .....ggguccgGuugguaauggcugua.....  | 1  | 1 | S03 |
| .....ggguccggaugguaauggcuguU.....  | 2  | 1 | S03 |
| .....ggguccggaugguaauggcugua.....  | 6  | 0 | S03 |
| .....ggguccggaugguaauggcuguaa..... | 1  | 0 | S03 |
| .....gguccggaugguaauggcugu.....    | 1  | 0 | S03 |
| .....gguccggaugguaauggcugA.....    | 1  | 1 | S03 |
| .....gguccggaugguaauggcugua.....   | 3  | 0 | S03 |
| .....gguccggaugguaauggcuguU.....   | 10 | 1 | S03 |
| .....gguccggaugguaauggcuguaa.....  | 2  | 0 | S03 |
| .....guccggaugguaauggcu.....       | 1  | 0 | S03 |
| .....guccggaugguaauggcugu.....     | 4  | 0 | S03 |
| .....guccggaugguaauggcugua.....    | 10 | 0 | S03 |
| .....guccggaugguaauggcuguaa.....   | 1  | 0 | S03 |
| .....guccggaugguaauggcuguagU.....  | 3  | 1 | S03 |
| .....guccggaugguaauggcCguagau..... | 1  | 1 | S03 |
| .....uccggaugguaauggcugu.....      | 1  | 0 | S03 |
| .....uccggaugguaauggcuguagU.....   | 2  | 1 | S03 |
| .....ccgaugguaauggcugu.....        | 2  | 0 | S03 |
| .....ccgaugguaauggcugGa.....       | 1  | 1 | S03 |
| .....ccgaugguaauggcugua.....       | 2  | 0 | S03 |
| .....Ncgaugguaauggcugua.....       | 1  | 1 | S03 |
| .....ccgaugguaauggcuguU.....       | 2  | 1 | S03 |
| .....ccgaugguaauggcuguagU.....     | 4  | 1 | S03 |
| .....ccgaugguaauggcuguaa.....      | 2  | 0 | S03 |
| .....gguaauggcuguagGuuuuuuu.....   | 1  | 1 | S03 |
| .....aauggcCguaguuuuuuuuuu.....    | 1  | 1 | S03 |
| .....uggcuguaguuuuuuuuuugcuU.....  | 1  | 1 | S03 |
| .....auagaaaaaaucugugacu.....      | 2  | 0 | S03 |
| .....auagaaaaaaucugugacuU.....     | 1  | 1 | S03 |
| .....uagaaaaCaaucugugac.....       | 1  | 1 | S03 |
| .....uagaaaaCaaucugugacu.....      | 1  | 1 | S03 |
| .....uagaaaaCaaucugugacu.....      | 3  | 1 | S03 |
| .....uagaaaaCaaucugugacuuuu.....   | 1  | 1 | S03 |
| .....uagaaaaCaaucugugacuuuuu.....  | 5  | 1 | S03 |
| .....agaaaaCaaucugugacu.....       | 11 | 1 | S03 |
| .....agaaaaCaaucugugacu.....       | 2  | 1 | S03 |
| .....agaaaaaaucugugacuuuu.....     | 1  | 0 | S03 |
| .....agaaaaCaaucugugacuuuu.....    | 9  | 1 | S03 |
| .....agaaaaaaucugugacuuuuu.....    | 1  | 0 | S03 |
| .....agaaaaaaucugugacuuuuC.....    | 1  | 1 | S03 |
| .....agaaaaCaaucugugacuuuuu.....   | 15 | 1 | S03 |
| .....agaaaaCaaucugugacuuuuug.....  | 20 | 1 | S03 |
| .....agaaaaaaucugugacuuuuuug.....  | 3  | 0 | S03 |
| .....gaaaaCaaucugugacu.....        | 9  | 1 | S03 |
| .....gaaaaCaaucugugacu.....        | 1  | 1 | S03 |
| .....gaaaaCaaucugugacuuu.....      | 4  | 1 | S03 |
| .....gaaaaCaaucugugacuuuu.....     | 1  | 1 | S03 |
| .....gaaaaCaaucugugacuuuuu.....    | 5  | 1 | S03 |
| .....gaaaaCaaucugugacuuuuug.....   | 11 | 1 | S03 |
| .....gaaaaCaaucugugacuuuuuug.....  | 29 | 1 | S03 |
| .....gaaaaUaaucugugacuuuuuug.....  | 1  | 1 | S03 |
| .....Aaaaaaaucugugacuuuuuug.....   | 1  | 1 | S03 |
| .....gaaaaaaucugugacuuuuuug.....   | 1  | 0 | S03 |
| .....aaaaCaaucugugacu.....         | 1  | 1 | S03 |
| .....aaaaCaaucugugacuuuu.....      | 2  | 1 | S03 |
| .....aaaaCaaucugugacuuuuu.....     | 1  | 1 | S03 |
| .....aaaaCaaucugugacuuuuuug.....   | 1  | 1 | S03 |
| .....aaaCaaucugugacu.....          | 1  | 1 | S03 |
| .....aaaCaaucugugacuuuuuug.....    | 16 | 1 | S03 |
| .....aaaCaaucugugacuuuuuug.....    | 1  | 1 | S03 |
| .....aaCaaucugugacuuuuu.....       | 1  | 1 | S03 |
| .....aaCaaucugugacuuuuuug.....     | 1  | 1 | S03 |
| .....aaCaaucugugacuuuuuug.....     | 15 | 1 | S03 |
| .....aaaaucugugacuuuuuug.....      | 1  | 0 | S03 |
| .....aaCaaucugugacuuuuuug.....     | 1  | 1 | S03 |
| .....aaaaCugugacuuuuuugug.....     | 1  | 1 | S03 |
| .....aaaaucugugacuuuuuugug.....    | 1  | 0 | S03 |





Star

Mature

|                                                                                                                                                                                                                                                                                                                                     |    |   |     |
|-------------------------------------------------------------------------------------------------------------------------------------------------------------------------------------------------------------------------------------------------------------------------------------------------------------------------------------|----|---|-----|
| uuaaa <u>u</u> agacuuuu <u>u</u> acuuauauaaa <u>u</u> uu <u>u</u> guaa <u>u</u> cauu <u>u</u> g <u>u</u> auuu <u>u</u> g <u>u</u> ca <u>u</u> aa <u>u</u> caaaaa <u>u</u> uuuu <u>u</u> aa <u>u</u> cca <u>u</u> gga <u>u</u> uu <u>u</u> aa <u>u</u> uu <u>u</u> gaa <u>u</u> gagagacuuuu <u>u</u> aacg <u>u</u> uuu <u>u</u> agua |    |   |     |
| .....aaaauuu <u>g</u> aaugagacuuC.....                                                                                                                                                                                                                                                                                              | 1  | 1 | S04 |
| .....aaaauuu <u>g</u> aaugagacuuuG.....                                                                                                                                                                                                                                                                                             | 1  | 1 | S04 |
| .....aaaauuu <u>g</u> aaugagacuuuaa.....                                                                                                                                                                                                                                                                                            | 2  | 0 | S04 |
| .....aaaauuu <u>g</u> aaugagacuuuaac.....                                                                                                                                                                                                                                                                                           | 9  | 0 | S04 |
| .....aaaauuu <u>g</u> aaugagacuuuaaca.....                                                                                                                                                                                                                                                                                          | 3  | 0 | S04 |
| .....aa <u>u</u> uu <u>g</u> aaugagacuu.....                                                                                                                                                                                                                                                                                        | 1  | 0 | S04 |
| .....aa <u>u</u> uu <u>g</u> aaugagacuuuaac.....                                                                                                                                                                                                                                                                                    | 1  | 0 | S04 |
| .....aa <u>u</u> uu <u>g</u> aaugagacuuAuaaca.....                                                                                                                                                                                                                                                                                  | 1  | 1 | S04 |
| .....aa <u>u</u> uu <u>g</u> aaugagacuuuuGaca.....                                                                                                                                                                                                                                                                                  | 2  | 1 | S04 |
| .....aa <u>u</u> uu <u>g</u> aaugagacuuuaaca.....                                                                                                                                                                                                                                                                                   | 12 | 0 | S04 |
| .....aa <u>u</u> uu <u>g</u> aaugagacuuuaacG.....                                                                                                                                                                                                                                                                                   | 2  | 1 | S04 |
| .....aa <u>u</u> uu <u>g</u> aaugagacuuuaaca.....                                                                                                                                                                                                                                                                                   | 3  | 0 | S04 |
| .....aa <u>u</u> uu <u>g</u> aaugagacuuuaacag.....                                                                                                                                                                                                                                                                                  | 2  | 0 | S04 |
| .....aa <u>u</u> uu <u>g</u> aaugagacuuuaacag.....                                                                                                                                                                                                                                                                                  | 3  | 1 | S04 |
| .....uu <u>g</u> aaugagacuuuaacagG.....                                                                                                                                                                                                                                                                                             | 1  | 1 | S04 |
| .....uu <u>g</u> aaugagacuuuaacagu.....                                                                                                                                                                                                                                                                                             | 1  | 1 | S04 |
| .....uu <u>g</u> aaugagacuuuaacagu.....                                                                                                                                                                                                                                                                                             | 4  | 0 | S04 |
| .....uu <u>g</u> aaugagacuuuaacagu.....                                                                                                                                                                                                                                                                                             | 1  | 0 | S04 |
| .....uu <u>g</u> aaugagacuuuaacagu.....                                                                                                                                                                                                                                                                                             | 2  | 1 | S04 |
| .....uu <u>g</u> aaugagacuuuaacagu.....                                                                                                                                                                                                                                                                                             | 1  | 1 | S04 |
| .....uu <u>g</u> aaugagacuuuaacagu.....                                                                                                                                                                                                                                                                                             | 2  | 0 | S04 |
| .....uu <u>g</u> aaugagacuuuaacagu.....                                                                                                                                                                                                                                                                                             | 1  | 0 | S04 |
| .....uu <u>g</u> aaugagacuuuaacagu.....                                                                                                                                                                                                                                                                                             | 1  | 0 | S04 |
| .....uu <u>g</u> aaugagacuuuaacagu.....                                                                                                                                                                                                                                                                                             | 1  | 0 | S04 |
| .....uu <u>g</u> aaugagacuuuaacagu.....                                                                                                                                                                                                                                                                                             | 1  | 1 | S04 |
| .....uu <u>g</u> aaugagacuuuaacagu.....                                                                                                                                                                                                                                                                                             | 1  | 1 | S04 |
| .....uu <u>g</u> aaugagacuuuaacagu.....                                                                                                                                                                                                                                                                                             | 1  | 0 | S04 |
| .....uu <u>g</u> aaugagacuuuaacagu.....                                                                                                                                                                                                                                                                                             | 1  | 1 | S04 |
| .....uu <u>g</u> aaugagacuuuaacagu.....                                                                                                                                                                                                                                                                                             | 1  | 0 | S04 |
| .....uu <u>g</u> aaugagacuuuaacagu.....                                                                                                                                                                                                                                                                                             | 1  | 1 | S04 |
| .....uu <u>g</u> aaugagacuuuaacagu.....                                                                                                                                                                                                                                                                                             | 1  | 1 | S04 |
| .....uu <u>g</u> aaugagacuuuaacagu.....                                                                                                                                                                                                                                                                                             | 1  | 0 | S04 |
| .....uu <u>g</u> aaugagacuuuaacagu.....                                                                                                                                                                                                                                                                                             | 1  | 1 | S04 |

Provisional ID : chrC04\_1713631  
 Score total : 0.6  
 Score for star read(s) : -1.3  
 Score for read counts : 0  
 Score for mfe : 1.9  
 Score for randfold : 0  
 Score for cons. seed :  
 Total read count : 328  
 Mature read count : 328  
 Loop read count : 0  
 Star read count : 0

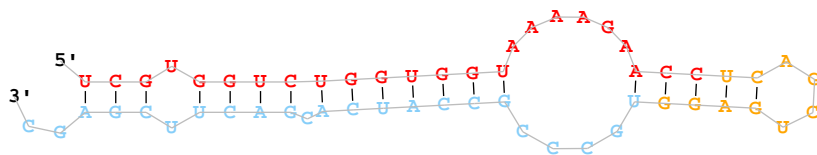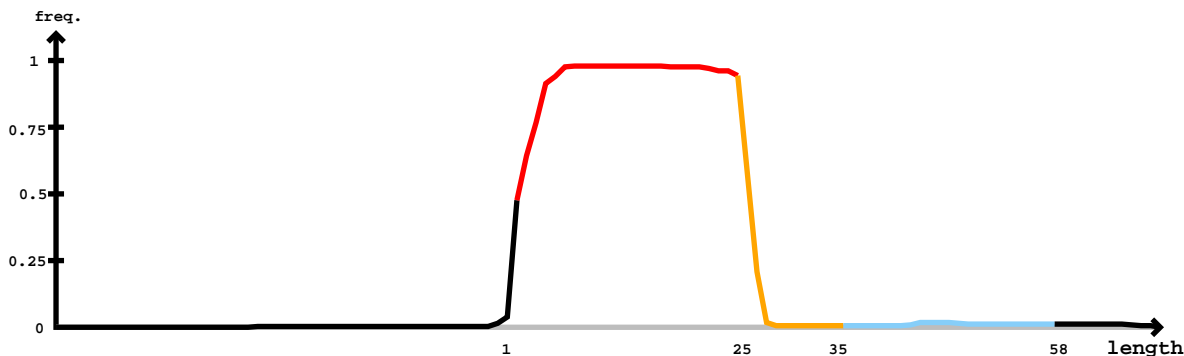

**Mature** **Star**

| 5' -                                                                                                           | reads | mm | sample |
|----------------------------------------------------------------------------------------------------------------|-------|----|--------|
| uugaauguuuuuuugucgaaaauuuuugaacagaaccgggccucguggucugggguaaaaagaaccucagcugaggugcccgccaucacgacuucgagcccccggccaca | exp   |    |        |
| .....((((((((.....)))))).....((((((((((((((((((((.....((((.....)))))).....)))))))).)))).....                   |       |    |        |
| .....ccucguggucugggguG.....                                                                                    | 1     | 1  | S03    |
| .....ccucguggucugggguaaaaag.....                                                                               | 1     | 0  | S03    |
| .....cucguggucugggguaaaaaga.....                                                                               | 1     | 0  | S03    |
| .....cucguggucugggguaaaaagaac.....                                                                             | 1     | 0  | S03    |
| .....cucguggucugggguaaaaagaacc.....                                                                            | 3     | 0  | S03    |
| .....ucguggucugggguaaaaagaac.....                                                                              | 1     | 0  | S03    |
| .....ucUuggucugggguaaaaagaacc.....                                                                             | 1     | 1  | S03    |
| .....uUguggucugggguaaaaagaacc.....                                                                             | 1     | 1  | S03    |
| .....ucguggucugggguaaGagaacc.....                                                                              | 1     | 1  | S03    |
| .....ucguggucugggguGaaagaacc.....                                                                              | 1     | 1  | S03    |
| .....ucguggucugggguaaaaagaacc.....                                                                             | 53    | 0  | S03    |
| .....Gcguggucugggguaaaaagaacc.....                                                                             | 1     | 1  | S03    |
| .....ucguggucugggguaaaaagaacU.....                                                                             | 17    | 1  | S03    |
| .....cguggucugggguaaaaagaac.....                                                                               | 3     | 0  | S03    |
| .....cguggucugggguaaaaagaacc.....                                                                              | 13    | 0  | S03    |
| .....cguggucugggguaaaaagaacU.....                                                                              | 5     | 1  | S03    |
| .....cCuggucugggguaaaaagaaccu.....                                                                             | 1     | 1  | S03    |
| .....cguggucugggguaaaaagaaccu.....                                                                             | 13    | 0  | S03    |
| .....cguggucugggguaaaaagaaccC.....                                                                             | 4     | 1  | S03    |
| .....guggucugggguaaaaagaacc.....                                                                               | 1     | 1  | S03    |
| .....guggucugggguaaaaagaacc.....                                                                               | 12    | 0  | S03    |
| .....guggucugggguaaaaagaaccG.....                                                                              | 1     | 1  | S03    |
| .....guggucugggguaaaaagaaccu.....                                                                              | 1     | 0  | S03    |
| .....guggucugggguaaaaagaaccuA.....                                                                             | 2     | 1  | S03    |
| .....guggucugggguaaaaagGaccuc.....                                                                             | 1     | 1  | S03    |
| .....guggucugggguaaaaagaaccuc.....                                                                             | 7     | 0  | S03    |
| .....guUgucugggguaaaaagaaccuc.....                                                                             | 1     | 1  | S03    |
| .....guggucugggguaaaaagaaccuU.....                                                                             | 2     | 1  | S03    |
| .....gugAucugggguaaaaagaaccuc.....                                                                             | 1     | 1  | S03    |
| .....uggucugggguaaaaagaacc.....                                                                                | 6     | 0  | S03    |
| .....uggucugggguaaaaagaaccu.....                                                                               | 4     | 0  | S03    |
| .....uggucugggguaaaaagaaccC.....                                                                               | 2     | 1  | S03    |
| .....uggucugggguaaaaagaaccA.....                                                                               | 1     | 1  | S03    |
| .....uggucuggGgguaaaaaagaaccuc.....                                                                            | 1     | 1  | S03    |



Provisional ID : chrC04\_1728927  
 Score total : 0.6  
 Score for star read(s) : -1.3  
 Score for read counts : 0  
 Score for mfe : 1.9  
 Score for randfold : 0  
 Score for cons. seed :  
 Total read count : 23  
 Mature read count : 23  
 Loop read count : 0  
 Star read count : 0

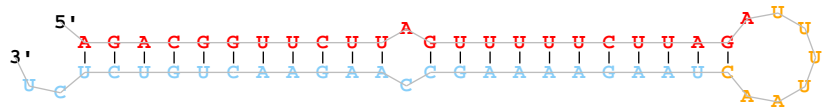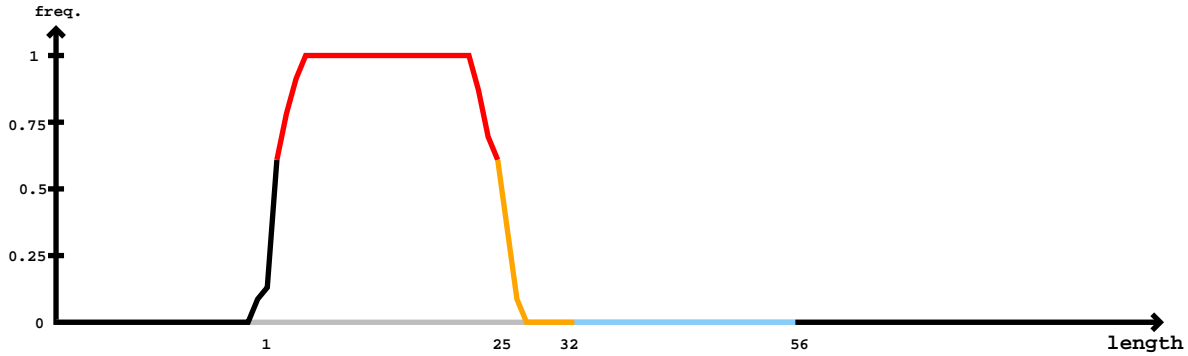

**Mature** **Star**

| 5' -                  |                                  | -3'                                                              | exp | reads | mm | sample |
|-----------------------|----------------------------------|------------------------------------------------------------------|-----|-------|----|--------|
| ggguucuuagcucacgcuaua | <b>agacggguucuuaguuuuucuuaga</b> | uuuuuacuaagaaaagccaagAACUGUCUCUAGAUAGAGAGAAUAAGAGUCUCUUAAGCGAAAA |     |       |    |        |
| .....                 | .....                            | .....                                                            |     |       |    |        |
| .....                 | auagacggguucuuaguuuuucuaa        | .....                                                            |     | 1     | 0  | S03    |
| .....                 | agacggguucuuaguuuuucuaa          | .....                                                            |     | 1     | 0  | S03    |
| .....                 | gacggguucuuaguuuuucuu            | .....                                                            |     | 1     | 0  | S03    |
| .....                 | gacggguucuuaguuuuucuuaga         | .....                                                            |     | 1     | 0  | S03    |
| .....                 | acggguucuuaguuuuucuu             | .....                                                            |     | 1     | 0  | S03    |
| .....                 | acggguucuuaguuuuucuuag           | .....                                                            |     | 1     | 0  | S03    |
| .....                 | acggguucuuaguuuuucuuagauu        | .....                                                            |     | 1     | 0  | S03    |
| .....                 | cggguucuuaguuuuucuuagauG         | .....                                                            |     | 1     | 1  | S03    |
| .....                 | .....                            | .....                                                            |     |       |    |        |
| .....                 | auagacggguucuuaguuuuucuaa        | .....                                                            |     | 1     | 0  | S04    |
| .....                 | uagacggguucuuaguuuuucuaa         | .....                                                            |     | 1     | 0  | S04    |
| .....                 | agacggguucuuaguuuuucuuag         | .....                                                            |     | 1     | 0  | S04    |
| .....                 | agacggguucuuaguuuuucuuaga        | .....                                                            |     | 8     | 0  | S04    |
| .....                 | agacggguucuuaguuuuucuuagC        | .....                                                            |     | 1     | 1  | S04    |
| .....                 | gacggguucuuaguuuuucuuagau        | .....                                                            |     | 1     | 0  | S04    |
| .....                 | gacggguucuuaguuuuucuuagCu        | .....                                                            |     | 1     | 1  | S04    |
| .....                 | cggguucuuaguuuuucuu              | .....                                                            |     | 1     | 0  | S04    |





Provisional ID : chrC04\_1740034  
 Score total : 5.4  
 Score for star read(s) : 3.9  
 Score for read counts : -0.3  
 Score for mfe : 1.8  
 Score for randfold : 0  
 Score for cons. seed :  
 Total read count : 11  
 Mature read count : 10  
 Loop read count : 0  
 Star read count : 1

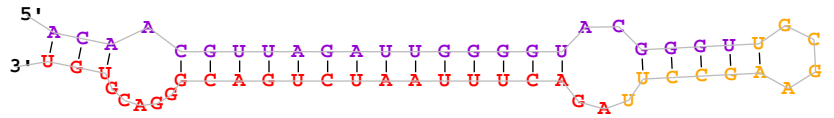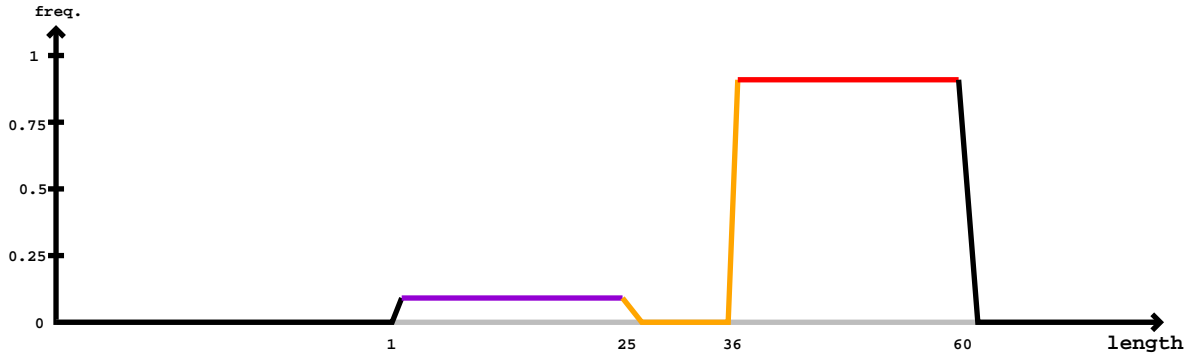

**Star**

**Mature**

| 5'                                 | Star                | Mature          | -3'                                         | obs | exp | reads | mm | sample |
|------------------------------------|---------------------|-----------------|---------------------------------------------|-----|-----|-------|----|--------|
| uuguuguaucugauuuuaguuugucuaagcuaac | acaacguuagauuggggua | cgguugcgaagccuu | agacuuuaucugacgggacguguuaguggaugguauggccuag | 4   | 0   | 4     | 0  | S03    |
| uuguuguaucugauuuuaguuugucuaagcuaac | acaacguuagauuggggua | cgguugcgaagccuu | agacuuuaucugacgggacguguuaguggaugguauggccuag | 1   | 0   | 1     | 0  | S04    |
| .....                              | .....               | .....           | .....                                       | 5   | 0   | 5     | 0  | S04    |
| .....                              | .....               | .....           | .....                                       | 1   | 1   | 1     | 1  | S04    |



Provisional ID : chrC04\_1754444  
 Score total : 0.6  
 Score for star read(s) : -1.3  
 Score for read counts : 0  
 Score for mfe : 1.9  
 Score for randfold : 0  
 Score for cons. seed :  
 Total read count : 275  
 Mature read count : 275  
 Loop read count : 0  
 Star read count : 0

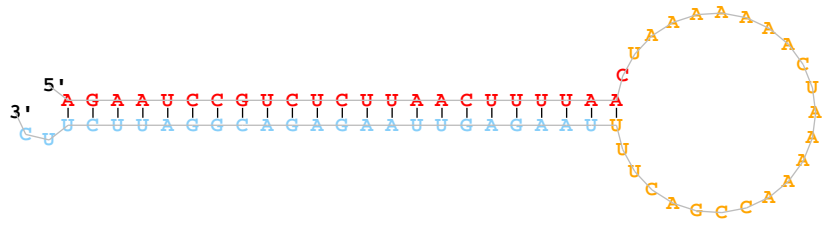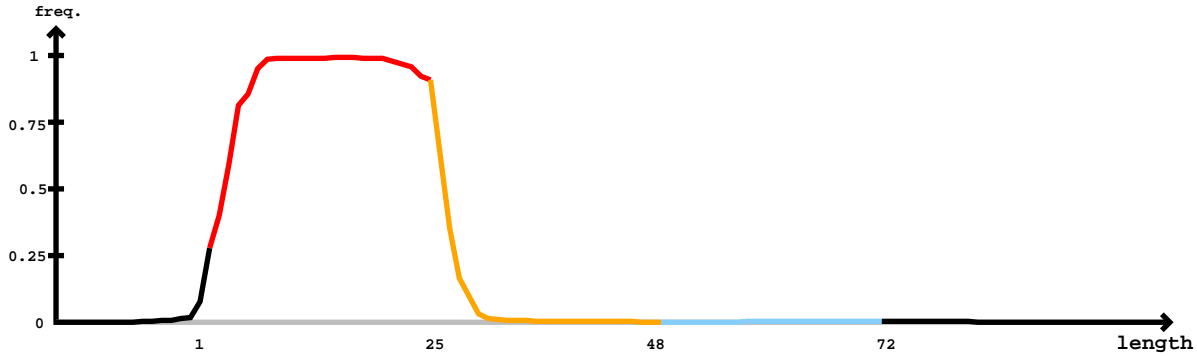

**Mature**

**Star**

| 5' -                                                                                                             | reads | mm | sample |
|------------------------------------------------------------------------------------------------------------------|-------|----|--------|
| uuuagcggauuuuagaauccgucucuuacuuaacuuuaacuaaaaaaaaaaaccgacuuuuuagaguuuagagacggauucuuuauucugugguaagaacccccauuaauca | 1     | 1  | S03    |
| .....                                                                                                            | 1     | 0  | S03    |
| .....                                                                                                            | 1     | 0  | S03    |
| .....                                                                                                            | 1     | 0  | S03    |
| .....                                                                                                            | 1     | 1  | S03    |
| .....                                                                                                            | 1     | 0  | S03    |
| .....                                                                                                            | 2     | 0  | S03    |
| .....                                                                                                            | 3     | 1  | S03    |
| .....                                                                                                            | 1     | 0  | S03    |
| .....                                                                                                            | 1     | 1  | S03    |
| .....                                                                                                            | 1     | 0  | S03    |
| .....                                                                                                            | 2     | 1  | S03    |
| .....                                                                                                            | 1     | 1  | S03    |
| .....                                                                                                            | 21    | 0  | S03    |
| .....                                                                                                            | 1     | 1  | S03    |
| .....                                                                                                            | 1     | 1  | S03    |
| .....                                                                                                            | 1     | 1  | S03    |
| .....                                                                                                            | 12    | 0  | S03    |
| .....                                                                                                            | 2     | 0  | S03    |
| .....                                                                                                            | 1     | 1  | S03    |
| .....                                                                                                            | 13    | 0  | S03    |
| .....                                                                                                            | 3     | 1  | S03    |
| .....                                                                                                            | 4     | 0  | S03    |
| .....                                                                                                            | 2     | 0  | S03    |
| .....                                                                                                            | 5     | 0  | S03    |
| .....                                                                                                            | 1     | 1  | S03    |
| .....                                                                                                            | 9     | 0  | S03    |
| .....                                                                                                            | 4     | 0  | S03    |
| .....                                                                                                            | 1     | 1  | S03    |
| .....                                                                                                            | 2     | 0  | S03    |
| .....                                                                                                            | 4     | 0  | S03    |
| .....                                                                                                            | 2     | 0  | S03    |
| .....                                                                                                            | 4     | 0  | S03    |
| .....                                                                                                            | 1     | 0  | S03    |

Mature

Star

|               |                                                                                                   |    |   |     |
|---------------|---------------------------------------------------------------------------------------------------|----|---|-----|
| uuuagcggauuaa | agaaucgucucuuaacuuuuuacuaaaaaaacuaaaaccgacuuuuuagaguuuagagacggauucuuuauucugugguaagaacccccauuaauca |    |   |     |
| .....         | cgucucuuaacuuuuuacuaaa                                                                            | 5  | 0 | S03 |
| .....         | cgucucuuaacuuuuuacuaaa                                                                            | 1  | 1 | S03 |
| .....         | cgucucuuaacuuuuuacuaaa                                                                            | 3  | 0 | S03 |
| .....         | cgucucuuaacuuuuuacua                                                                              | 1  | 0 | S03 |
| .....         | cgucucuuaacuuuuuacuaa                                                                             | 1  | 0 | S03 |
| .....         | cgucGcuuaacuuuuuacuaa                                                                             | 1  | 1 | S03 |
| .....         | cgucucuuaacuuuuuacuaaa                                                                            | 2  | 0 | S03 |
| .....         | cgucucuuaacuuuuuacuaaaaa                                                                          | 1  | 0 | S03 |
| .....         | agagacggauucuuuauucugug                                                                           | 1  | 0 | S03 |
| .....         | gaauuaagaauccgucucuuaa                                                                            | 1  | 0 | S04 |
| .....         | auuaagaauccgucucuuaacuu                                                                           | 1  | 0 | S04 |
| .....         | aagaauccgucucuuaacuuuu                                                                            | 1  | 0 | S04 |
| .....         | aagaauccgucucuuaacuuuuG                                                                           | 2  | 1 | S04 |
| .....         | aagaauccgucucuuaacuuuuu                                                                           | 2  | 0 | S04 |
| .....         | aagaauccgucucuuaacuuuuGa                                                                          | 2  | 1 | S04 |
| .....         | agaauccgucucuuaacuuuuuac                                                                          | 26 | 0 | S04 |
| .....         | agaauccgGcucuuaacuuuuuac                                                                          | 1  | 1 | S04 |
| .....         | agaauccgucAucuuaacuuuuuac                                                                         | 1  | 1 | S04 |
| .....         | agaaGccgucucuuaacuuuuuac                                                                          | 1  | 1 | S04 |
| .....         | agaauccgucucuuaacuuuuuacu                                                                         | 1  | 0 | S04 |
| .....         | gaauccgucucuuaacuu                                                                                | 1  | 0 | S04 |
| .....         | gaauccgucucuuaacuuuuuacG                                                                          | 1  | 1 | S04 |
| .....         | gaauccgucucuCaacuuuuuacu                                                                          | 1  | 1 | S04 |
| .....         | gaauccgucucuuaacuuuuuacu                                                                          | 18 | 0 | S04 |
| .....         | gaauccgucucuuaacuuAuaacu                                                                          | 1  | 1 | S04 |
| .....         | aaucgucucuuaacuuuuuG                                                                              | 1  | 1 | S04 |
| .....         | aaucgucucuuaacuuuuuac                                                                             | 2  | 0 | S04 |
| .....         | aaucgucucuuaacuuuuuacu                                                                            | 10 | 0 | S04 |
| .....         | aaucgucucuuaacuuuuuacA                                                                            | 1  | 1 | S04 |
| .....         | aaucgucucuuaacuuuuuacua                                                                           | 15 | 0 | S04 |
| .....         | aCuccgucucuuaacuuuuuacua                                                                          | 1  | 1 | S04 |
| .....         | aaucgucucuuaacuuCuaacua                                                                           | 1  | 1 | S04 |
| .....         | auccgucucuuaacuuuuuac                                                                             | 2  | 0 | S04 |
| .....         | auccgucucuuaacuuuuuacA                                                                            | 3  | 1 | S04 |
| .....         | auccgucucuuaacuuuCaacu                                                                            | 1  | 1 | S04 |
| .....         | auccgucucuuaacuuAaacu                                                                             | 1  | 1 | S04 |
| .....         | auccgucucuuaacuuuuuacu                                                                            | 10 | 0 | S04 |
| .....         | auccgucucuuaacuuuuuacuC                                                                           | 1  | 1 | S04 |
| .....         | auccgucucuuaacuuuuuacua                                                                           | 13 | 0 | S04 |
| .....         | auccgucucuuaacuuuuuacuaa                                                                          | 5  | 0 | S04 |
| .....         | auccgucucuuaacuuuuuacuG                                                                           | 5  | 1 | S04 |
| .....         | uccgucucuuaacuuuuuacu                                                                             | 2  | 0 | S04 |
| .....         | uccgucucuuaacuuuuuacua                                                                            | 1  | 0 | S04 |
| .....         | Nccgucucuuaacuuuuuacuaaa                                                                          | 1  | 1 | S04 |
| .....         | uccgucucuuaacuuuuuacuaaa                                                                          | 1  | 0 | S04 |
| .....         | uccgucucuuaacuuuuuacuAGa                                                                          | 1  | 1 | S04 |
| .....         | cgucucuuaacuuuuuacu                                                                               | 3  | 0 | S04 |
| .....         | cgucucuuaacuuuuuacua                                                                              | 4  | 0 | S04 |
| .....         | cgucucuuaacuuuuuacuaaa                                                                            | 3  | 0 | S04 |
| .....         | cgucucuuaacuuuuuacuaaaaa                                                                          | 1  | 0 | S04 |
| .....         | cgucucuuaacuuuuuacuaa                                                                             | 2  | 0 | S04 |
| .....         | cgucucuuaacuuuuuacuaaa                                                                            | 2  | 0 | S04 |
| .....         | gucucuuaacuuuuuacuaaCaaa                                                                          | 1  | 1 | S04 |
| .....         | uaacuuuuuacuaaaaaacu                                                                              | 1  | 0 | S04 |
| .....         | aacuaaaaaacuaaaaaccgacu                                                                           | 1  | 0 | S04 |

Provisional ID : chrC04\_random\_2857844  
 Score total : 0.2  
 Score for star read(s) : -1.3  
 Score for read counts : 0  
 Score for mfe : 1.5  
 Score for randfold : 0  
 Score for cons. seed :  
 Total read count : 29  
 Mature read count : 29  
 Loop read count : 0  
 Star read count : 0

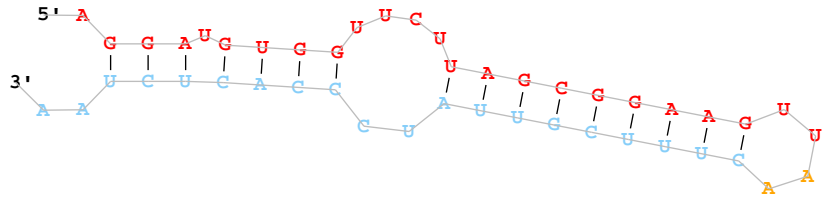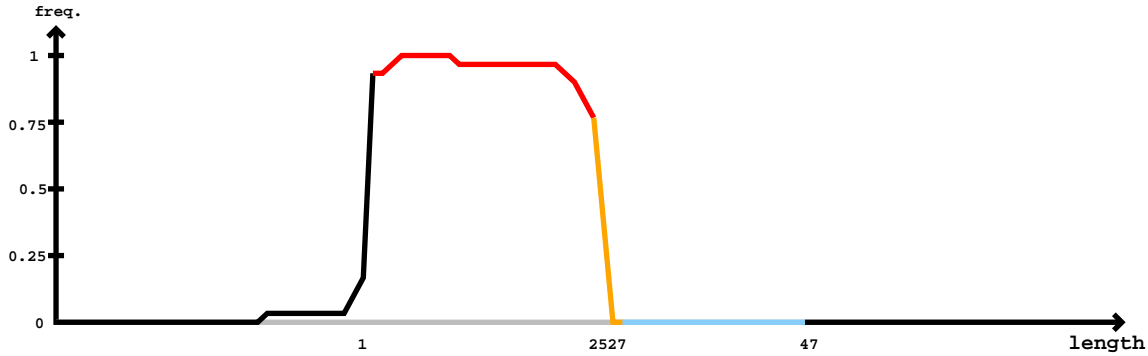

Mature                      Star

| 5' -                                                                         | -3' | exp | reads | mm | sample |
|------------------------------------------------------------------------------|-----|-----|-------|----|--------|
| aagguaagaacaugauuaacccgugguuauuaggaugugguucuuagcggaaguuaacuuucguuauccacucuaa |     |     |       |    |        |
| .....uuaggaCgugguucuuagcggaag.....                                           |     |     | 2     | 1  | S03    |
| .....aggaugugguucuuagcggaagu.....                                            |     |     | 5     | 0  | S03    |
| .....aggaCgugguucuuagcggaagu.....                                            |     |     | 5     | 1  | S03    |
| .....aCgugguucuuagcggaagu.....                                               |     |     | 1     | 1  | S03    |
| .....ccgugguuauuaggaugugC.....                                               |     |     | 1     | 1  | S04    |
| .....uaCgaugugguucuuagcggaagu.....                                           |     |     | 1     | 1  | S04    |
| .....uaggaugugguucuuagcggaagu.....                                           |     |     | 1     | 0  | S04    |
| .....aggaCgugguucuuagcgga.....                                               |     |     | 1     | 1  | S04    |
| .....aggaCgugguucuuagcggaagu.....                                            |     |     | 9     | 1  | S04    |
| .....aggaugugguucuuagcggaagu.....                                            |     |     | 2     | 0  | S04    |
| .....aggauagugguucuuagcggaagu.....                                           |     |     | 1     | 1  | S04    |
| .....gaCgugguucuuagcgga.....                                                 |     |     | 1     | 1  | S04    |







Provisional ID : chrC05\_1806215  
 Score total : 0.4  
 Score for star read(s) : 3.9  
 Score for read counts : -4.9  
 Score for mfe : 1.5  
 Score for randfold : 0  
 Score for cons. seed :  
 Total read count : 2  
 Mature read count : 1  
 Loop read count : 0  
 Star read count : 1

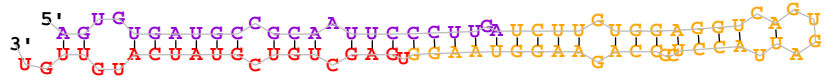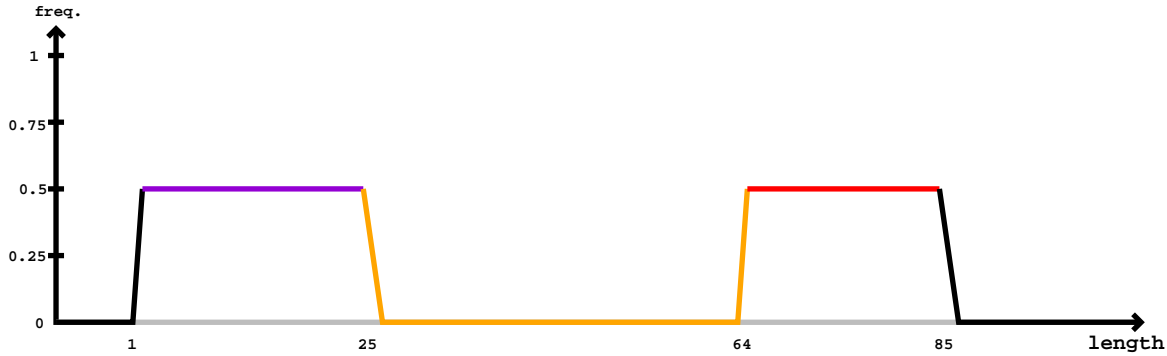

**Star**

**Mature**

| 5' | Star                              | Mature                                                       | -3'                   | obs | exp | reads | mm | sample |
|----|-----------------------------------|--------------------------------------------------------------|-----------------------|-----|-----|-------|----|--------|
| 5' | uuuucgaagugugaugccgcaaucccuuga    | ucuuguggaggucagugauuaccucgccagaagguaaggugagcugucguaucauguugu | aggauuguuacuaccuggaca | 1   | 1   | 1     | 1  | S04    |
|    | uuuucgaagugugaugccgcaaucccuuga    | ucuuguggaggucagugauuaccucgccagaagguaaggugagcugucguaucauguugu | aggauuguuacuaccuggaca | 1   | 0   | 1     | 0  | S04    |
|    | .....agugugaugccgcaaucccuuga..... | .....ugagcugucguaucauguugu.....                              |                       |     |     |       |    |        |



Star

Mature

| Sequence                                                                                  | Star | Mature | Category |
|-------------------------------------------------------------------------------------------|------|--------|----------|
| gcuuuuuuuuaggguuuuuuguuuccucggaagccucagaauuuuccgaggaaauuccgaggaaauucccggaaauuccgagguuuucc |      |        |          |
| .....ccgaggaauuccgagCaaau.....                                                            | 1    | 1      | S03      |
| .....aaguguuucucggaauuccucg.....                                                          | 1    | 0      | S03      |
| .....aguguuucucggaauucccucgga.....                                                        | 1    | 0      | S03      |
| .....uguuucucggaauuccuc.....                                                              | 1    | 0      | S03      |
| .....guuucucggaauucccucgga.....                                                           | 2    | 0      | S03      |
| .....uuucucggaauucccucggaaua.....                                                         | 2    | 0      | S03      |
| .....uucucggaauucccucggaau.....                                                           | 2    | 0      | S03      |
| .....uucucggaauucccucggaauG.....                                                          | 1    | 1      | S03      |
| .....uucucggaauCuccucggaauuu.....                                                         | 1    | 1      | S03      |
| .....uucucggaauucccucggaauuu.....                                                         | 1    | 0      | S03      |
| .....ucucggaauucccucgga.....                                                              | 1    | 0      | S03      |
| .....ucucggaauucccucggaaua.....                                                           | 1    | 0      | S03      |
| .....Acucggaauucccucggaauu.....                                                           | 1    | 1      | S03      |
| .....ucucggaauucccucggaauuu.....                                                          | 1    | 0      | S03      |
| .....cucggaauucccucgga.....                                                               | 7    | 0      | S03      |
| .....cucggaauucccucggaau.....                                                             | 8    | 0      | S03      |
| .....cucggaauucccucggaC.....                                                              | 1    | 1      | S03      |
| .....cucggaauucccucggaaua.....                                                            | 13   | 0      | S03      |
| .....cucggaauucccucggaauu.....                                                            | 8    | 0      | S03      |
| .....cucggaauucccucggaauuC.....                                                           | 4    | 1      | S03      |
| .....cucggaauucccucggaauuu.....                                                           | 39   | 0      | S03      |
| .....cucggaauucccucggaauuuc.....                                                          | 5    | 0      | S03      |
| .....ucggaauucccucggaau.....                                                              | 11   | 0      | S03      |
| .....ucggaauucccucggaaua.....                                                             | 4    | 0      | S03      |
| .....ucggaauucccucggaauu.....                                                             | 4    | 0      | S03      |
| .....ucggaauucccucggaauuu.....                                                            | 34   | 0      | S03      |
| .....ucggaauucccucggaauuC.....                                                            | 3    | 1      | S03      |
| .....ucggaauuccCcggaauuuc.....                                                            | 1    | 1      | S03      |
| .....ucggaauucccucggaauuuccgaggu.....                                                     | 1    | 0      | S03      |
| .....cggaauucccucggaaua.....                                                              | 4    | 0      | S03      |
| .....cggaauucccucggaauu.....                                                              | 2    | 0      | S03      |
| .....cggaauucccucggaauuu.....                                                             | 12   | 0      | S03      |
| .....cggaauuccCcggaauuu.....                                                              | 1    | 1      | S03      |
| .....cggaauucccucggaauuC.....                                                             | 2    | 1      | S03      |
| .....cggaauucccucggaauuuc.....                                                            | 1    | 0      | S03      |
| .....ggaauucccucggaauu.....                                                               | 2    | 0      | S03      |
| .....aaauucccucggaauuuccga.....                                                           | 1    | 0      | S03      |
| .....auuucccucggaauuucc.....                                                              | 1    | 0      | S03      |
| .....auuucccucggaauuuccgag.....                                                           | 1    | 0      | S03      |
| .....uCuguuuccucggaagccuca.....                                                           | 1    | 1      | S04      |
| .....uuccucggaagccucagaaua.....                                                           | 1    | 0      | S04      |
| .....ccucggaagccucagaauuG.....                                                            | 2    | 1      | S04      |
| .....cucggaagccucagaauA.....                                                              | 1    | 1      | S04      |
| .....cucAgaaaagccucagaauuu.....                                                           | 1    | 1      | S04      |
| .....ucggaagccucagaauuu.....                                                              | 1    | 0      | S04      |
| .....cucagaauuuccgaAgaaau.....                                                            | 1    | 1      | S04      |
| .....cagaauuuccgaggaau.....                                                               | 1    | 0      | S04      |
| .....cagCauauuccgaggaauucc.....                                                           | 1    | 1      | S04      |
| .....agaauuuccgaggaauuAccgag.....                                                         | 1    | 1      | S04      |
| .....aaauuccgaggaauucc.....                                                               | 1    | 0      | S04      |
| .....aaauuccgaggaauuccga.....                                                             | 7    | 0      | S04      |
| .....aaauuccgUggaauuccga.....                                                             | 1    | 1      | S04      |
| .....aaauuccgaggaauuccgU.....                                                             | 1    | 1      | S04      |
| .....aaauuccgaggaauuccgag.....                                                            | 2    | 0      | S04      |
| .....aaUGuuccgaggaauuccgag.....                                                           | 1    | 1      | S04      |
| .....aaauuccgaggaauuccgagU.....                                                           | 3    | 1      | S04      |
| .....aaauuccgaggaauuccg.....                                                              | 2    | 0      | S04      |
| .....aaauuccgaggaauuccga.....                                                             | 5    | 0      | S04      |
| .....aaauuccgaggaauuccgag.....                                                            | 1    | 0      | S04      |
| .....aaauuccgaggaauuccgagg.....                                                           | 2    | 0      | S04      |
| .....aaauuccgaggaauuccgagU.....                                                           | 7    | 1      | S04      |
| .....aaauuccgaggaauuccga.....                                                             | 1    | 0      | S04      |
| .....aaauuccgaggaauuccgagg.....                                                           | 4    | 0      | S04      |
| .....gaggaauuccgaggaau.....                                                               | 1    | 0      | S04      |
| .....aaguguuucucggaauucccucg.....                                                         | 1    | 0      | S04      |
| .....aaguguuucucggaauucccucgA.....                                                        | 1    | 1      | S04      |
| .....aaguguuAcucggaauucccucg.....                                                         | 1    | 1      | S04      |
| .....guuucucggaauucccucgUaa.....                                                          | 1    | 1      | S04      |
| .....uuucucggaauucccucggaaua.....                                                         | 1    | 0      | S04      |

Star

Mature

|                                                                                                                 |    |   |     |
|-----------------------------------------------------------------------------------------------------------------|----|---|-----|
| gcuuuuuuuuaggguuuuuguuuccucggaaaagccucagaaauuuccgaggaauuccgaggaaauccaaguuuucucggaaauuccucggaaauuuccgagggcuuuucc |    |   |     |
| .....uucucggaaauuccucggaaau.....                                                                                | 1  | 0 | S04 |
| .....uGcucggaaauuccucggaaauuu.....                                                                              | 1  | 1 | S04 |
| .....uucucggaaauuccucggaaauuu.....                                                                              | 1  | 0 | S04 |
| .....uAcucggaaauuccucggaaauuu.....                                                                              | 1  | 1 | S04 |
| .....ucucggaaauuccucggaaau.....                                                                                 | 1  | 0 | S04 |
| .....ucucggaaauuccucggaaauu.....                                                                                | 1  | 0 | S04 |
| .....cucggaaauuccucggaa.....                                                                                    | 8  | 0 | S04 |
| .....cucggaaauuccucggaa.....                                                                                    | 9  | 0 | S04 |
| .....cucggaaauuccucggaaau.....                                                                                  | 22 | 0 | S04 |
| .....cucggaaauuccucggaaUG.....                                                                                  | 1  | 1 | S04 |
| .....cucggaaauuccucggaaauu.....                                                                                 | 16 | 0 | S04 |
| .....cucggaaauuccucggaaauuC.....                                                                                | 4  | 1 | S04 |
| .....cucggaaauuccucggaaauuu.....                                                                                | 40 | 0 | S04 |
| .....Nucggaaauuccucggaaauuu.....                                                                                | 1  | 1 | S04 |
| .....cucggaaauuccucggaaCauuc.....                                                                               | 1  | 1 | S04 |
| .....cucggaaauuccucggaaauuuc.....                                                                               | 3  | 0 | S04 |
| .....cucggaaauuccucggaaauuucc.....                                                                              | 1  | 0 | S04 |
| .....ucggaaauuccucggaa.....                                                                                     | 11 | 0 | S04 |
| .....ucggaaauuccucggaaau.....                                                                                   | 7  | 0 | S04 |
| .....ucggaaauuccucggaaauu.....                                                                                  | 4  | 0 | S04 |
| .....ucggaaCuuccucggaaauuu.....                                                                                 | 1  | 1 | S04 |
| .....ucggaauCuccucggaaauuu.....                                                                                 | 1  | 1 | S04 |
| .....ucggaaauuccucggaaauuC.....                                                                                 | 1  | 1 | S04 |
| .....ucggaaauuccucggaaauuu.....                                                                                 | 32 | 0 | S04 |
| .....Ncggaaauuccucggaaauuu.....                                                                                 | 1  | 1 | S04 |
| .....ucggaaauuccucggaaauuuc.....                                                                                | 3  | 0 | S04 |
| .....cgaaauuccucggaaau.....                                                                                     | 2  | 0 | S04 |
| .....cgaaauuccucggaaauu.....                                                                                    | 2  | 0 | S04 |
| .....cgaaauuccucggaaauuu.....                                                                                   | 6  | 0 | S04 |
| .....cgaaauuccucggaaauuuc.....                                                                                  | 1  | 0 | S04 |
| .....auuuccucggaaauuuccgagU.....                                                                                | 1  | 1 | S04 |

Provisional ID : chrC05\_1817982  
 Score total : 0.2  
 Score for star read(s) : -1.3  
 Score for read counts : 0  
 Score for mfe : 1.5  
 Score for randfold : 0  
 Score for cons. seed :  
 Total read count : 14  
 Mature read count : 14  
 Loop read count : 0  
 Star read count : 0

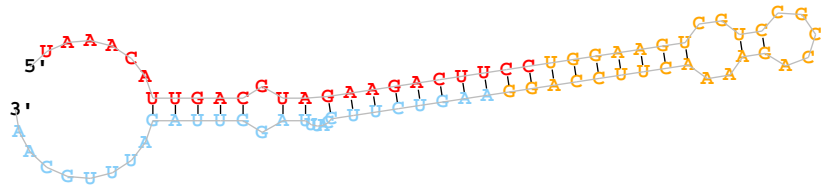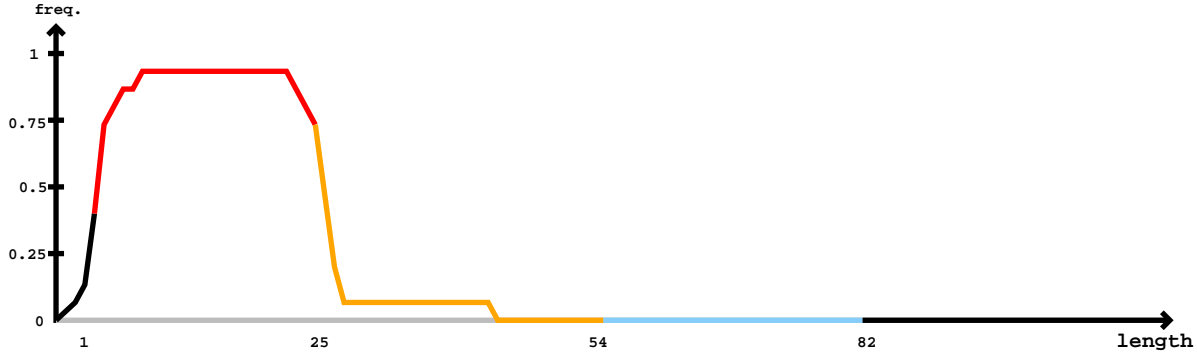

**Mature**

**Star**

| 5' -                                                                                                              | 3'  | exp | reads | mm | sample |
|-------------------------------------------------------------------------------------------------------------------|-----|-----|-------|----|--------|
| auuaaacaugacguagaagacuuccuggaagucguccgccagaaaaacuuccagggaagucuucauuuagguuagauuugcaauugaaaauuuacaaggaaggcuuccauaga | -3' |     |       |    |        |
| .....(((((((.....)))))).....                                                                                      |     |     |       |    |        |
| .uuaaacaugacguagaagacuuc.....                                                                                     |     |     | 1     | 0  | S03    |
| ..Aaaacaugacguagaagacuucc.....                                                                                    |     |     | 1     | 1  | S03    |
| ...aaacaugacguagaagacuuccu.....                                                                                   |     |     | 1     | 0  | S03    |
| .....acuuccuggaagucguccgccaga.....                                                                                |     |     | 1     | 0  | S03    |
|                                                                                                                   |     |     |       |    |        |
| auuaaacaugacguagaagacuu.....                                                                                      |     |     | 1     | 0  | S04    |
| ..uaaacaugacguagaag.....                                                                                          |     |     | 1     | 0  | S04    |
| ..Aaaacaugacguagaagacuucc.....                                                                                    |     |     | 2     | 1  | S04    |
| ...aaacaugacguagaagacA.....                                                                                       |     |     | 1     | 1  | S04    |
| ...aaacaugacguagaagacuuccu.....                                                                                   |     |     | 1     | 0  | S04    |
| ...aaacaucgacguagaagacuuccu.....                                                                                  |     |     | 1     | 1  | S04    |
| ...aaacaugacguagaagacuuccuC.....                                                                                  |     |     | 1     | 1  | S04    |
| ...aacauugacguagaagacuuccG.....                                                                                   |     |     | 1     | 1  | S04    |
| ...acaugacguagaagUcuucc.....                                                                                      |     |     | 1     | 1  | S04    |
| .....auugacguagaagacuuccuA.....                                                                                   |     |     | 1     | 1  | S04    |

Provisional ID : chrC05\_1820363  
 Score total : 0.7  
 Score for star read(s) : -1.3  
 Score for read counts : 0  
 Score for mfe : 2  
 Score for randfold : 0  
 Score for cons. seed :  
 Total read count : 26  
 Mature read count : 23  
 Loop read count : 0  
 Star read count : 3

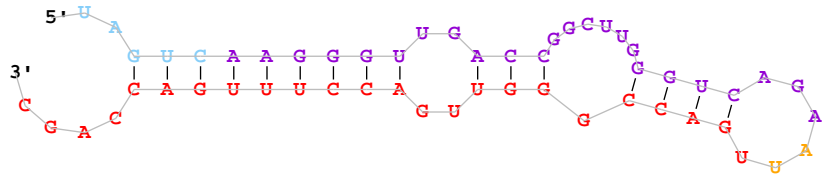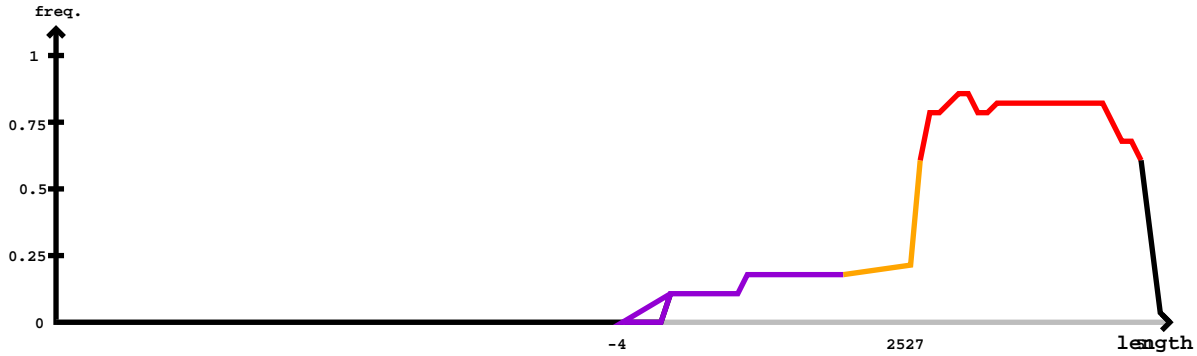

Star
Mature

|                                                                                                                                                                                                                                                                                                                                                                                                                                                                                                                                                                                                                                                                                                                                                                                                                                                                                                                                                                                                                        |                                                           |
|------------------------------------------------------------------------------------------------------------------------------------------------------------------------------------------------------------------------------------------------------------------------------------------------------------------------------------------------------------------------------------------------------------------------------------------------------------------------------------------------------------------------------------------------------------------------------------------------------------------------------------------------------------------------------------------------------------------------------------------------------------------------------------------------------------------------------------------------------------------------------------------------------------------------------------------------------------------------------------------------------------------------|-----------------------------------------------------------|
| 5' - uccaauugaaaucgaacucgguaaaagaaaaccgggugguucaauucgauuucauuuagucaaggguuugaccggcuugggucagaauugaccggguugaccuuugaccagcgg<br>uccaauugaaaucgaacucgguaaaagaaaaccgggugguucaauucgauuucauuuagucaaggguuugaccggcuugggucagaauugaccggguugaccuuugaccagcgg<br>...((((((((((((((((((((.....)))))))))).....))))))))))..((((((((((((((((.....((((.....))))..))))..)))))))))).....<br>.....uugaccggguugaccuuugacc.....<br>.....uugaccggguugaccuuugaccG.....<br>.....ugaccggguugaccuuugaccagc..<br>.....gaccggguugaccuuugacc.....<br>.....gaccggguugaccuuugaccagcG.<br>.....cggguugaccuuugaccagc..<br><br>.....aaggguuAaccggcuuggguc.....<br>.....aaggguuAaccggcuugggucag.....<br>.....aaggguuugaccggcuugggucaga.....<br>.....accggcuugggucagaaugaccg.....<br>.....uugaccggguugaccuuugaccag.....<br>.....ugaccggguugaccuuugaccG.....<br>.....ugaccggguugaccuuugaccagc..<br>.....ugaccggguugaccuuugaccaUc..<br>.....gaccggguugaccuuugaccagc..<br>.....gaccggguugaccuuugaAcagcG.<br>.....cggguugaccuuugaccagcG.<br>.....uugaccuuugaccagcUg | -3' obs<br>exp<br><br>reads<br>mm<br><br>sample           |
|                                                                                                                                                                                                                                                                                                                                                                                                                                                                                                                                                                                                                                                                                                                                                                                                                                                                                                                                                                                                                        | 1<br>0.75<br>0.5<br>0.25<br>0<br><br>-4<br>2527<br>length |
|                                                                                                                                                                                                                                                                                                                                                                                                                                                                                                                                                                                                                                                                                                                                                                                                                                                                                                                                                                                                                        | 1<br>0.75<br>0.5<br>0.25<br>0<br><br>-4<br>2527<br>length |
|                                                                                                                                                                                                                                                                                                                                                                                                                                                                                                                                                                                                                                                                                                                                                                                                                                                                                                                                                                                                                        | 1<br>0.75<br>0.5<br>0.25<br>0<br><br>-4<br>2527<br>length |

Provisional ID : chrC05\_1827956  
 Score total : 0.9  
 Score for star read(s) : -1.3  
 Score for read counts : 0  
 Score for mfe : 2.2  
 Score for randfold : 0  
 Score for cons. seed :  
 Total read count : 574  
 Mature read count : 568  
 Loop read count : 0  
 Star read count : 6

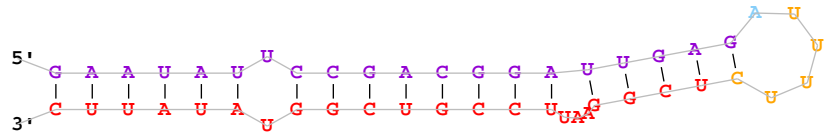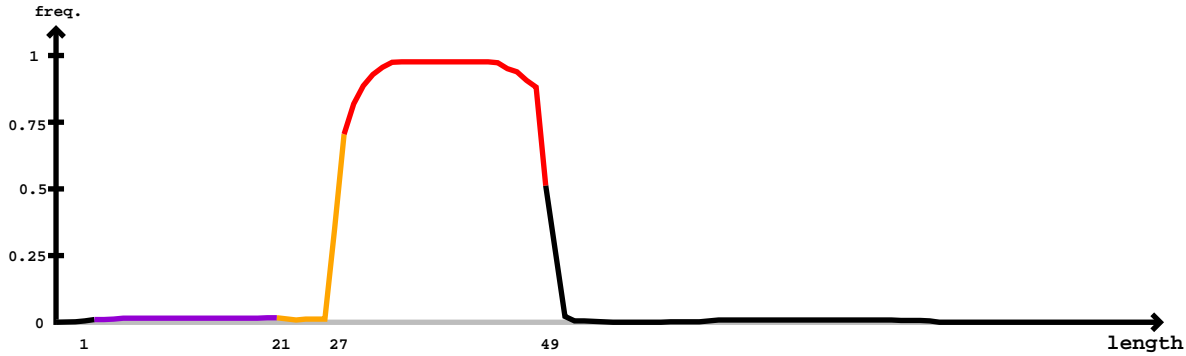

**Star**                      **Mature**

| 5' -                                                                                                                      | -3' | obs | exp | reads | mm | sample |
|---------------------------------------------------------------------------------------------------------------------------|-----|-----|-----|-------|----|--------|
| aagaauuuccgacggauugagaauuuucucggaauuccgucgguaauuucugaagaaccaaauuuuguguuuucucggaauucccgaaaauucccggaauucccgagg              |     |     |     |       |    |        |
| aagaauuuccgacggauugagaauuuucucggaauuccgucgguaauuucugaagaaccaaauuuuguguuuucucggaauucccgaaaauucccggaauucccgagg              |     |     |     |       |    |        |
| .(((((((.((((((((((((((((.....)))))).....)))))))).))))))....(((((((.....).))))))((((((((((((((((.....)))))).....)))))))). |     |     |     |       |    |        |
| .agaaauuccgacggauugaC.....                                                                                                |     |     |     | 1     | 1  | S03    |
| ...auuuccgacggauugagCu.....                                                                                               |     |     |     | 1     | 1  | S03    |
| ...uauuccgCcggaugaga.....                                                                                                 |     |     |     | 2     | 1  | S03    |
| .....auuuucucggaauuccgucgguaG.....                                                                                        |     |     |     | 1     | 1  | S03    |
| .....auuuucucggaauuccgucgguaU.....                                                                                        |     |     |     | 1     | 0  | S03    |
| .....uuucucggaauuccgucggua.....                                                                                           |     |     |     | 1     | 0  | S03    |
| .....uucucggaauuccgucgguaauu.....                                                                                         |     |     |     | 1     | 0  | S03    |
| .....cucggaauuccgucggua.....                                                                                              |     |     |     | 7     | 0  | S03    |
| .....cucggaauuccgucgguaU.....                                                                                             |     |     |     | 1     | 0  | S03    |
| .....cucggaauuccgucgguaua.....                                                                                            |     |     |     | 1     | 0  | S03    |
| .....cucggaauuccgucgguaUG.....                                                                                            |     |     |     | 1     | 1  | S03    |
| .....cucggaauuccgucgguauu.....                                                                                            |     |     |     | 2     | 0  | S03    |
| .....cucggaauuccgucgguaUGuu.....                                                                                          |     |     |     | 1     | 1  | S03    |
| .....cucggUauuccgucgguaauu.....                                                                                           |     |     |     | 2     | 1  | S03    |
| .....cucggaauuccgucgguaauu.....                                                                                           |     |     |     | 50    | 0  | S03    |
| .....cucggaauuccgucgguaauuuc.....                                                                                         |     |     |     | 20    | 0  | S03    |
| .....cucggaauuccgucgguaauuucU.....                                                                                        |     |     |     | 7     | 0  | S03    |
| .....ucggaauuccgucgguaU.....                                                                                              |     |     |     | 1     | 0  | S03    |
| .....ucggaauuccgucgguaua.....                                                                                             |     |     |     | 7     | 0  | S03    |
| .....ucggaauuccgucgguaUG.....                                                                                             |     |     |     | 1     | 1  | S03    |
| .....ucggaauuccgucgguauu.....                                                                                             |     |     |     | 2     | 0  | S03    |
| .....ucggaauuccgucgguauuu.....                                                                                            |     |     |     | 20    | 0  | S03    |
| .....ucggaauuccgucgguauuuuc.....                                                                                          |     |     |     | 53    | 0  | S03    |
| .....cggaauuccgucgguaua.....                                                                                              |     |     |     | 1     | 0  | S03    |
| .....cggaauuccgucgguauu.....                                                                                              |     |     |     | 4     | 0  | S03    |
| .....cggaauuccgucgguauuu.....                                                                                             |     |     |     | 9     | 0  | S03    |
| .....cggaauuccgucgguauuuc.....                                                                                            |     |     |     | 1     | 1  | S03    |
| .....cggaauuccgucgguauuucU.....                                                                                           |     |     |     | 15    | 0  | S03    |
| .....ggaauuccgucgguauuu.....                                                                                              |     |     |     | 16    | 0  | S03    |
| .....ggaauuccgucgguauuuuc.....                                                                                            |     |     |     | 4     | 0  | S03    |
| .....ggaauCccgucgguauuuucU.....                                                                                           |     |     |     | 1     | 1  | S03    |
| .....gaaauuccgucgguauuu.....                                                                                              |     |     |     | 6     | 0  | S03    |
| .....gaaauuccgucgguauuuuc.....                                                                                            |     |     |     | 2     | 0  | S03    |

Star

Mature

|                                                                                                                    |    |   |     |
|--------------------------------------------------------------------------------------------------------------------|----|---|-----|
| aagaauauuccgacggauugagaauuuucucggaaauuccgucgguaauuucugaagaaccaaauuuuguguuuucucggaaauucccgaauauucccggggaauauuccgagg |    |   |     |
| . . . . . gaauuccgucgguaauuucu . . . . .                                                                           | 1  | 0 | S03 |
| . . . . . gaauuccgucgguaauuucA . . . . .                                                                           | 1  | 1 | S03 |
| . . . . . gGauuccgucgguaauuucug . . . . .                                                                          | 1  | 1 | S03 |
| . . . . . gaauuccgucgguaauuucug . . . . .                                                                          | 1  | 0 | S03 |
| . . . . . aaauccgucgguaauuuc . . . . .                                                                             | 10 | 0 | S03 |
| . . . . . aaauccgucgguaauuucu . . . . .                                                                            | 1  | 0 | S03 |
| . . . . . aaauccgucgguaauuucugaaga . . . . .                                                                       | 1  | 0 | S03 |
| . . . . . auuccgucgguaauuucu . . . . .                                                                             | 3  | 0 | S03 |
| . . . . . auCccgucgguaauuucu . . . . .                                                                             | 1  | 1 | S03 |
| . . . . . auuccgucgguaauuucug . . . . .                                                                            | 1  | 0 | S03 |
| . . . . . auuuuguguuuucucggaaauucA . . . . .                                                                       | 1  | 1 | S03 |
| . . . . . uguguuuCucggaaauucccga . . . . .                                                                         | 1  | 1 | S03 |
| aagaauauuccgacggauugaCa . . . . .                                                                                  | 1  | 1 | S04 |
| . Ggaauauuccgacggauugagauu . . . . .                                                                               | 1  | 1 | S04 |
| . . gaauauuccgacggauugag . . . . .                                                                                 | 2  | 0 | S04 |
| . . gaauauuccgacggauugaga . . . . .                                                                                | 1  | 0 | S04 |
| . . . . . agauuuucucggaaauuccgucggG . . . . .                                                                      | 1  | 1 | S04 |
| . . . . . uuucucggaaauuccgucggua . . . . .                                                                         | 1  | 0 | S04 |
| . . . . . uuucucggGauuccgucggua . . . . .                                                                          | 1  | 1 | S04 |
| . . . . . cucggaaauuccgucggua . . . . .                                                                            | 6  | 0 | S04 |
| . . . . . cucggaaauuccgucggua . . . . .                                                                            | 1  | 0 | S04 |
| . . . . . cucggaaauuccgucggua . . . . .                                                                            | 3  | 0 | S04 |
| . . . . . cucggaaauuccgucggua . . . . .                                                                            | 60 | 0 | S04 |
| . . . . . cucggGauuccgucggua . . . . .                                                                             | 1  | 1 | S04 |
| . . . . . cucggaaauuccgucggua . . . . .                                                                            | 1  | 1 | S04 |
| . . . . . cucggaaauuccgucggua . . . . .                                                                            | 23 | 0 | S04 |
| . . . . . cucggaauCccgucggua . . . . .                                                                             | 1  | 1 | S04 |
| . . . . . cucggaaauuccgucggua . . . . .                                                                            | 9  | 0 | S04 |
| . . . . . ucggaaauuccgucggua . . . . .                                                                             | 2  | 0 | S04 |
| . . . . . ucggaaauuccgucgguaG . . . . .                                                                            | 1  | 1 | S04 |
| . . . . . ucggaaauuccgucggua . . . . .                                                                             | 4  | 0 | S04 |
| . . . . . ucggaaauuccgucggua . . . . .                                                                             | 2  | 0 | S04 |
| . . . . . ucggaaauuccgucggua . . . . .                                                                             | 30 | 0 | S04 |
| . . . . . ucggaaauuccgucggua . . . . .                                                                             | 1  | 1 | S04 |
| . . . . . ucggaaauuccgucggua . . . . .                                                                             | 1  | 1 | S04 |
| . . . . . ucggaaauuccgucggua . . . . .                                                                             | 85 | 0 | S04 |
| . . . . . ucggaaauuccgucggua . . . . .                                                                             | 1  | 1 | S04 |
| . . . . . ucggaaauuccgucggua . . . . .                                                                             | 1  | 0 | S04 |
| . . . . . cggaaauuccgucggua . . . . .                                                                              | 1  | 0 | S04 |
| . . . . . cggaaauuccgucggua . . . . .                                                                              | 1  | 0 | S04 |
| . . . . . cggaaauuccgucggua . . . . .                                                                              | 8  | 0 | S04 |
| . . . . . cggaaauuccgucggua . . . . .                                                                              | 1  | 1 | S04 |
| . . . . . cggaaauuccgucggua . . . . .                                                                              | 23 | 0 | S04 |
| . . . . . cggaaauuccgucggua . . . . .                                                                              | 1  | 0 | S04 |
| . . . . . cggaaauuccgucggua . . . . .                                                                              | 1  | 0 | S04 |
| . . . . . cggaaauuccgucggua . . . . .                                                                              | 1  | 0 | S04 |
| . . . . . ggaauuccgucggua . . . . .                                                                                | 1  | 0 | S04 |
| . . . . . ggaauuccgucggua . . . . .                                                                                | 13 | 0 | S04 |
| . . . . . ggaauuccgucggua . . . . .                                                                                | 5  | 0 | S04 |
| . . . . . gaauuccgucggua . . . . .                                                                                 | 1  | 0 | S04 |
| . . . . . gaauuccgucggua . . . . .                                                                                 | 9  | 0 | S04 |
| . . . . . gaauuccgucggua . . . . .                                                                                 | 2  | 0 | S04 |
| . . . . . gaauuccgucggua . . . . .                                                                                 | 1  | 0 | S04 |
| . . . . . aaauccgucggua . . . . .                                                                                  | 2  | 0 | S04 |
| . . . . . aaauccgucggua . . . . .                                                                                  | 2  | 0 | S04 |
| . . . . . auuccgucAguauuucu . . . . .                                                                              | 1  | 1 | S04 |
| . . . . . auuccgucggua . . . . .                                                                                   | 3  | 0 | S04 |
| . . . . . auuccgucggua . . . . .                                                                                   | 1  | 0 | S04 |
| . . . . . auuccgucggua . . . . .                                                                                   | 1  | 0 | S04 |
| . . . . . uuuccgucggua . . . . .                                                                                   | 1  | 0 | S04 |
| . . . . . uuuccgucggua . . . . .                                                                                   | 1  | 0 | S04 |
| . . . . . uguguuuucucggaaauucccga . . . . .                                                                        | 1  | 1 | S04 |
| . . . . . guguuuucucggaaauucccug . . . . .                                                                         | 1  | 0 | S04 |
| . . . . . guguuuucucggaaauucccga . . . . .                                                                         | 1  | 1 | S04 |



Provisional ID : chrC05\_1835067  
 Score total : 0.1  
 Score for star read(s) : -1.3  
 Score for read counts : 0  
 Score for mfe : 1.4  
 Score for randfold : 0  
 Score for cons. seed :  
 Total read count : 117  
 Mature read count : 117  
 Loop read count : 0  
 Star read count : 0

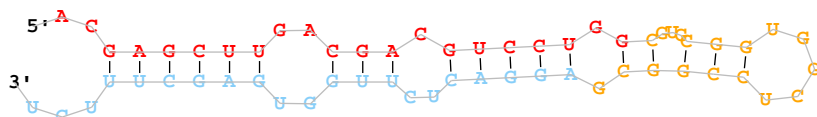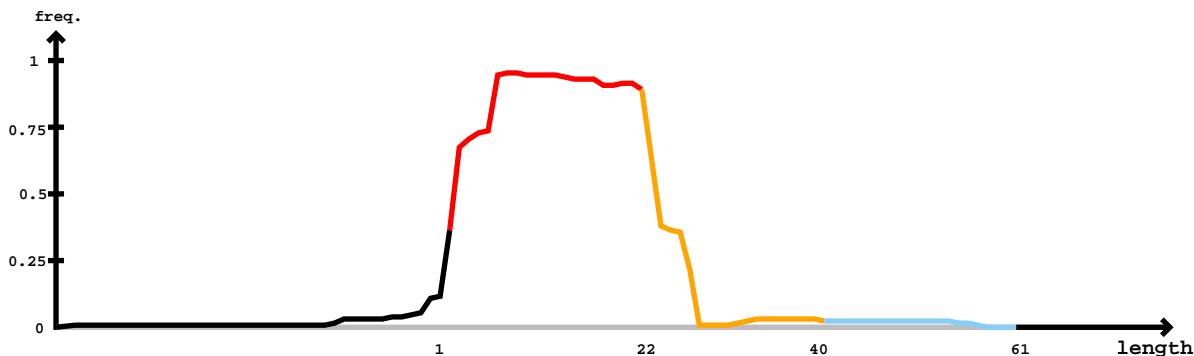

**Mature** **Star**

| 5' -                                                                                                                | reads | mm | sample |
|---------------------------------------------------------------------------------------------------------------------|-------|----|--------|
| gcgguuuccgguuaccucgagcugcgguuugauggugaugacgagcucugacgacgucucggcgugcgguggucucggcgaggacucuuuggugagcuuucucucucucucucuc | 1     | 0  | S03    |
| .....ugcgguuugauggugaugacgag.....                                                                                   | 1     | 0  | S03    |
| .....ugauggugaugacgagcuugacCa.....                                                                                  | 1     | 1  | S03    |
| .....augacgagcuugacgacgu.....                                                                                       | 1     | 0  | S03    |
| .....ugacgagcuugacgacgucucggc.....                                                                                  | 4     | 0  | S03    |
| .....acgagcuugacgacgCccugg.....                                                                                     | 1     | 1  | S03    |
| .....acgagcuugacgacgucucgg.....                                                                                     | 13    | 0  | S03    |
| .....acgagcuugacgacgucucgC.....                                                                                     | 1     | 1  | S03    |
| .....acgagcuugacgacgucucggc.....                                                                                    | 4     | 0  | S03    |
| .....cgagcuugacgacgucucgg.....                                                                                      | 1     | 0  | S03    |
| .....cgagcuugacgacgCccuggc.....                                                                                     | 1     | 1  | S03    |
| .....cgagcuugacgacgucucggc.....                                                                                     | 12    | 0  | S03    |
| .....cgagcuugacgacgucucggA.....                                                                                     | 1     | 1  | S03    |
| .....cgagcuugacgacgucucggG.....                                                                                     | 2     | 1  | S03    |
| .....cgagcuuAacgacgucucggcg.....                                                                                    | 1     | 1  | S03    |
| .....cgagcuugacgacgucucggcgug.....                                                                                  | 6     | 0  | S03    |
| .....cgaUcuugacgacgucucggcgug.....                                                                                  | 1     | 1  | S03    |
| .....gagcuugacgacgucucggc.....                                                                                      | 1     | 0  | S03    |
| .....agcuugacgacgucucggcgu.....                                                                                     | 1     | 0  | S03    |
| .....cuugacgacgucucggcgug.....                                                                                      | 1     | 0  | S03    |
| .....cuugacgacgucucggcgugc.....                                                                                     | 10    | 0  | S03    |
| .....cuugacgacgucucggcgugA.....                                                                                     | 2     | 1  | S03    |
| .....cuugacgacgucucggcgugG.....                                                                                     | 1     | 1  | S03    |
| .....uugacgacgucucggcgug.....                                                                                       | 1     | 0  | S03    |
| .....cuccggcgaggacucuuuggugagc.....                                                                                 | 1     | 0  | S03    |
| gcgguuuccgguuaccucgagc.....                                                                                         | 1     | 0  | S04    |
| .....uugauggugaugacgagcuu.....                                                                                      | 1     | 0  | S04    |
| .....ugauggugaugacgagcuugacA.....                                                                                   | 1     | 1  | S04    |
| .....gugaugacgagcuugacAacgu.....                                                                                    | 1     | 1  | S04    |
| .....gaugacgagcuugacgaUgucucg.....                                                                                  | 1     | 1  | S04    |
| .....ugacgagcuugacgacgu.....                                                                                        | 1     | 0  | S04    |
| .....ugacgagcuugacgacgucucgg.....                                                                                   | 1     | 0  | S04    |
| .....ugacgagcuugacgacgucucggc.....                                                                                  | 1     | 0  | S04    |
| .....gacgagcuugacgacgucucg.....                                                                                     | 1     | 0  | S04    |







Provisional ID : chrC05\_1843412  
 Score total : 0  
 Score for star read(s) : 3.9  
 Score for read counts : -4.9  
 Score for mfe : 1.1  
 Score for randfold : 0  
 Score for cons. seed :  
 Total read count : 2  
 Mature read count : 1  
 Loop read count : 0  
 Star read count : 1

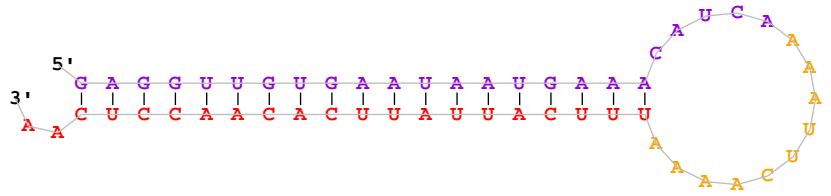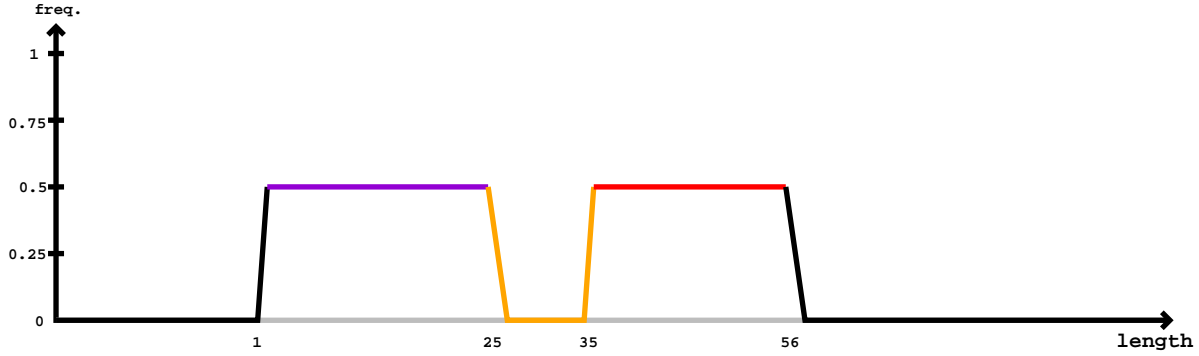

Star Mature

|                                                                                                                                                                                                                                                                                                                                                                 |                                                   |                               |
|-----------------------------------------------------------------------------------------------------------------------------------------------------------------------------------------------------------------------------------------------------------------------------------------------------------------------------------------------------------------|---------------------------------------------------|-------------------------------|
| 5' - accaaaaaaaaaaguuugagguugugaauaaugaaacaucaaaaaucaaaauuucauuuuucaacaaccucaaaaauugaagauuugaaauuggguuggaaaucucuaaug<br>accaaaaaaaaaaguuugagguugugaauaaugaacaacaauucaaaauuucauuuuucaacaaccucaaaaauugaagauuugaaauuggguuggaaaucucuaaug<br>..((((.....(((.....((((((((((((((((((((((((((((.....)))))))))))))))))).....))))).<br>.....gagguugugaauaaugaaacauca..... | -3' obs<br>exp<br>reads mm<br>1 0<br>.....<br>1 1 | sample<br>s03<br>.....<br>s04 |
|-----------------------------------------------------------------------------------------------------------------------------------------------------------------------------------------------------------------------------------------------------------------------------------------------------------------------------------------------------------------|---------------------------------------------------|-------------------------------|



Star

Mature

|                                                                                                          |     |   |     |
|----------------------------------------------------------------------------------------------------------|-----|---|-----|
| aaaaaaacacgucucucgguaauuuuuuugucuaauuucuggaaaagcgagagggucucguugcacuuuccaaaugagacaaagcaaaaccgugaugacgucaa |     |   |     |
| .....uccaaaugagacaaagU.....                                                                              | 54  | 1 | S03 |
| .....uccaaaCguagacaaagc.....                                                                             | 1   | 1 | S03 |
| .....uccaaaugagacaaagc.....                                                                              | 175 | 0 | S03 |
| .....uccaaaugagacaaagcC.....                                                                             | 9   | 1 | S03 |
| .....uccaaauguaAacaaagca.....                                                                            | 2   | 1 | S03 |
| .....uccaaaugGagacaaagca.....                                                                            | 3   | 1 | S03 |
| .....uccaaaugagacaaagca.....                                                                             | 733 | 0 | S03 |
| .....Nccaaaugagacaaagca.....                                                                             | 1   | 1 | S03 |
| .....uccaaaugagacaaagGa.....                                                                             | 1   | 1 | S03 |
| .....uccaaaugagacGagca.....                                                                              | 4   | 1 | S03 |
| .....uccaaaugagacaaagUa.....                                                                             | 1   | 1 | S03 |
| .....Gccaaaugagacaaagca.....                                                                             | 2   | 1 | S03 |
| .....uccaaaugagacaaGgca.....                                                                             | 2   | 1 | S03 |
| .....uccaaaugAagacaaagca.....                                                                            | 6   | 1 | S03 |
| .....uccaaaugagacaaagAa.....                                                                             | 1   | 1 | S03 |
| .....uccaaauguUgacaaagca.....                                                                            | 2   | 1 | S03 |
| .....Cccaaaugagacaaagca.....                                                                             | 2   | 1 | S03 |
| .....uccCaaugagacaaagca.....                                                                             | 1   | 1 | S03 |
| .....uccaaaugagacGaaagca.....                                                                            | 1   | 1 | S03 |
| .....uccaaaCguagacaaagca.....                                                                            | 1   | 1 | S03 |
| .....ucccaGaugagacaaagca.....                                                                            | 1   | 1 | S03 |
| .....uccaaaugCagacaaagca.....                                                                            | 4   | 1 | S03 |
| .....uccaaauguaCacaaagca.....                                                                            | 1   | 1 | S03 |
| .....uccaaaugagacaaaCca.....                                                                             | 2   | 1 | S03 |
| .....uccaaaugagacUagca.....                                                                              | 1   | 1 | S03 |
| .....uccaaaugagacaaagcU.....                                                                             | 40  | 1 | S03 |
| .....uccaaaugagacaaaUca.....                                                                             | 3   | 1 | S03 |
| .....uccaaauguGgacaaagca.....                                                                            | 2   | 1 | S03 |
| .....ucccaCaugagacaaagca.....                                                                            | 1   | 1 | S03 |
| .....uccaaaugagGcaaaagca.....                                                                            | 4   | 1 | S03 |
| .....ucccaaGugagacaaagca.....                                                                            | 2   | 1 | S03 |
| .....uccaaaugagacaaagcG.....                                                                             | 34  | 1 | S03 |
| .....uGccaaaugagacaaagca.....                                                                            | 1   | 1 | S03 |
| .....uccGaaugagacaaagca.....                                                                             | 3   | 1 | S03 |
| .....uccaaaugagacacagca.....                                                                             | 1   | 1 | S03 |
| .....uccaaaugagCcaaaagca.....                                                                            | 1   | 1 | S03 |
| .....uccaaaugagacaaaAca.....                                                                             | 1   | 1 | S03 |
| .....uccaaaugagacGaaagca.....                                                                            | 3   | 1 | S03 |
| .....uccAaaaugagacaaagca.....                                                                            | 1   | 1 | S03 |
| .....uccaaaugagacaaagcaC.....                                                                            | 6   | 1 | S03 |
| .....uccaaaugagacaaagcaU.....                                                                            | 25  | 1 | S03 |
| .....uccaaaugagacaaagcaa.....                                                                            | 2   | 0 | S03 |
| .....uccaaaugagacaaagcUa.....                                                                            | 1   | 1 | S03 |
| .....ccaaaugagacaaagcaaU.....                                                                            | 1   | 1 | S03 |
| .....ccaaaugagacaaagcaaa.....                                                                            | 1   | 0 | S03 |
| .....ccaaaugagacaaagcaaaC.....                                                                           | 1   | 1 | S03 |
| .....ccaaaugagacaaagcaaaac.....                                                                          | 2   | 0 | S03 |
| .....ccaaaugagacaaagcaaaaU.....                                                                          | 1   | 1 | S03 |
| .....ccaaaugagacaaagcaaaaC.....                                                                          | 2   | 1 | S03 |
| .....caaaugagacaaagcaaaa.....                                                                            | 2   | 0 | S03 |
| .....caaaugagacaaagcaaaaU.....                                                                           | 2   | 1 | S03 |
| .....caaaugagacaaagcaaaaac.....                                                                          | 8   | 0 | S03 |
| .....aaugagacaaagcaaaaccguga.....                                                                        | 1   | 0 | S03 |
| .....ucgguaauuucuuugucuaauucC.....                                                                       | 1   | 1 | S04 |
| .....cuuugucuaauuucugga.....                                                                             | 3   | 0 | S04 |
| .....cuuugucuaauuucuggaaa.....                                                                           | 1   | 0 | S04 |
| .....cuuugucuaauuucuggaaa.....                                                                           | 15  | 0 | S04 |
| .....cuuugucuaauuucuggaaa.....                                                                           | 1   | 1 | S04 |
| .....cuuugucuaauuucuggaaaU.....                                                                          | 2   | 1 | S04 |
| .....cuuugucuaauuucuggaaaC.....                                                                          | 1   | 1 | S04 |
| .....cuuugucuaauuucuggaaaU.....                                                                          | 7   | 1 | S04 |
| .....acuuuccaaaugagacaaagc.....                                                                          | 1   | 0 | S04 |
| .....acuuuccaaaugagacaaagca.....                                                                         | 1   | 0 | S04 |
| .....acuuAccaaaugagacaaagca.....                                                                         | 1   | 1 | S04 |
| .....acuuuccaaaugagacGagca.....                                                                          | 1   | 1 | S04 |
| .....acuuuccaaaugagacaaagcaU.....                                                                        | 1   | 1 | S04 |
| .....cuuuccaaaugagacaaagca.....                                                                          | 1   | 0 | S04 |
| .....uuuccaaaugagacaaagA.....                                                                            | 1   | 1 | S04 |
| .....Auuccaaaugagacaaagc.....                                                                            | 1   | 1 | S04 |

Star

Mature

aaaaaaacacgucucucgguuuuuuuugucuaauuuuuggaaaagcgagagggucucguugcacuuuccaaaauagacaaagcaaaaaccgugaugacgucaa

|                                |      |   |     |
|--------------------------------|------|---|-----|
| .....uuccaaaauagacaaagc.....   | 6    | 0 | S04 |
| .....uuccaaaauagacaaagA.....   | 1    | 1 | S04 |
| .....uuGccaaaauagacaaagc.....  | 2    | 1 | S04 |
| .....uucccGaaauagacaaagca..... | 1    | 1 | S04 |
| .....uucccAAAuagacaaaAca.....  | 1    | 1 | S04 |
| .....CucccAAAuagacaaagca.....  | 1    | 1 | S04 |
| .....uucccAAAuagacaaagcU.....  | 1    | 1 | S04 |
| .....uucccAAAuagacaaagcG.....  | 3    | 1 | S04 |
| .....uucccAAAuagacaaagca.....  | 25   | 0 | S04 |
| .....uuGccAAAuagacaaagca.....  | 4    | 1 | S04 |
| .....uucccCaaauagacaaagca..... | 1    | 1 | S04 |
| .....uucccAAAuagacaaagcaU..... | 1    | 1 | S04 |
| .....ucccAAAuagacaaag.....     | 6    | 0 | S04 |
| .....ucccAAAuagacaaaU.....     | 1    | 1 | S04 |
| .....ucccAGaaugacaaagc.....    | 2    | 1 | S04 |
| .....ucccAAAuagacaaaAc.....    | 3    | 1 | S04 |
| .....ucccAAAuagacaaagA.....    | 11   | 1 | S04 |
| .....ucccAAAuagacaaAcg.....    | 1    | 1 | S04 |
| .....GcccAAAuagacaaagc.....    | 1    | 1 | S04 |
| .....ucccAAAuagacaaagc.....    | 1    | 1 | S04 |
| .....ucccAAAuagacaaagc.....    | 1    | 1 | S04 |
| .....ucccAAAuagacaaagc.....    | 2    | 1 | S04 |
| .....ucccAAAuagacaaagc.....    | 289  | 0 | S04 |
| .....ucccAAAuagacaaagc.....    | 1    | 1 | S04 |
| .....ucccAAAuagacaaagU.....    | 78   | 1 | S04 |
| .....ucccAAAuagacaaagG.....    | 1    | 1 | S04 |
| .....ucccAAAuagacaaGgc.....    | 1    | 1 | S04 |
| .....ucccAAAuagacaaaUc.....    | 1    | 1 | S04 |
| .....NcccAAAuagacaaagc.....    | 1    | 1 | S04 |
| .....ucccAAAuagacaaagc.....    | 1    | 1 | S04 |
| .....ucccAAAuagacaaagc.....    | 2    | 1 | S04 |
| .....ucccAAAuagacaaGgca.....   | 2    | 1 | S04 |
| .....ucccAAAuagacaaUgca.....   | 3    | 1 | S04 |
| .....ucccAGaaugacaaagca.....   | 3    | 1 | S04 |
| .....ucccAAAuagacaaagca.....   | 6    | 1 | S04 |
| .....ucccAAAuagacaaagca.....   | 2    | 1 | S04 |
| .....ucccAAAuagacaaagcC.....   | 9    | 1 | S04 |
| .....ucccAAAuagacaaaUca.....   | 3    | 1 | S04 |
| .....ucccAAUgaaugacaaagca..... | 1    | 1 | S04 |
| .....ucccAAAuagacaaaAca.....   | 13   | 1 | S04 |
| .....ucccAAAuagacCaaagca.....  | 1    | 1 | S04 |
| .....ucccAAAuagacaaagcG.....   | 87   | 1 | S04 |
| .....ucccAAAuagacaaagca.....   | 9    | 1 | S04 |
| .....uccAAAuagacaaagca.....    | 1    | 1 | S04 |
| .....ucccAAAuagacaaagUa.....   | 1    | 1 | S04 |
| .....ucccAAAuagacCaaagca.....  | 1    | 1 | S04 |
| .....AcccAAAuagacaaagca.....   | 2    | 1 | S04 |
| .....ucccAAAuagacaaaCca.....   | 2    | 1 | S04 |
| .....ucccAAAuagacCaaagca.....  | 5    | 1 | S04 |
| .....uccUaaaugacaaagca.....    | 2    | 1 | S04 |
| .....ucccAAAuagacaaagca.....   | 2    | 1 | S04 |
| .....ucccCaaugacaaagca.....    | 1    | 1 | S04 |
| .....ucccAAAuagacGaaagca.....  | 3    | 1 | S04 |
| .....ucccAAAuagacaaagca.....   | 1    | 1 | S04 |
| .....CcccAAAuagacaaagca.....   | 7    | 1 | S04 |
| .....ucUcAAAuagacaaagca.....   | 1    | 1 | S04 |
| .....ucccAAUgaaugacaaagca..... | 1    | 1 | S04 |
| .....ucccAAAuagacaaagca.....   | 1    | 1 | S04 |
| .....ucccAAAuagacCaaagca.....  | 1    | 1 | S04 |
| .....ucccAAAuagacaaagAa.....   | 2    | 1 | S04 |
| .....GcccAAAuagacaaagca.....   | 4    | 1 | S04 |
| .....ucccAAAuagacAGagca.....   | 2    | 1 | S04 |
| .....uccGAAAuagacaaagca.....   | 1    | 1 | S04 |
| .....ucccAAAuagacaaagca.....   | 1312 | 0 | S04 |
| .....NcccAAAuagacaaagca.....   | 3    | 1 | S04 |
| .....ucccGaaugacaaagca.....    | 4    | 1 | S04 |
| .....ucccAAAuagacaaagcU.....   | 113  | 1 | S04 |
| .....uGccAAAuagacaaagca.....   | 2    | 1 | S04 |
| .....ucccAAAuagacCaaagca.....  | 6    | 1 | S04 |
| .....ucccAAAuagacUcAAagca..... | 3    | 1 | S04 |



Star

Mature

|                                                                                                           |    |   |     |
|-----------------------------------------------------------------------------------------------------------|----|---|-----|
| aaaaaaacacgucucucgguaauuuuuugucuaauuuuuggaaaagcgagagggucucguugcacuuuccaaauguagacaaagcaaaaaccgugaugacgucaa |    |   |     |
| .....ucGcaaauguagacaaagca.....                                                                            | 1  | 1 | S04 |
| .....ucccaaauguGgacaaagca.....                                                                            | 4  | 1 | S04 |
| .....ucccaaauguagacaaagcaU.....                                                                           | 85 | 1 | S04 |
| .....ucccaaauguagacaaagcaa.....                                                                           | 6  | 0 | S04 |
| .....ucccaaauguagacaaagcUa.....                                                                           | 2  | 1 | S04 |
| .....ucccaaauguagacaaagcaG.....                                                                           | 1  | 1 | S04 |
| .....ucccaaauguagacaaagcaC.....                                                                           | 13 | 1 | S04 |
| .....ucccaaauguagacaaagcaaU.....                                                                          | 6  | 1 | S04 |
| .....ucccaaauguagacaaagcaUa.....                                                                          | 1  | 1 | S04 |
| .....ucccaaauguagacaaagcaaC.....                                                                          | 1  | 1 | S04 |
| .....ucccaaauguagacaaagcaaUa.....                                                                         | 1  | 1 | S04 |
| .....ucccaaauguagacaaagcaUaa.....                                                                         | 1  | 1 | S04 |
| .....ucccaaauguagacaaagcaaaUc.....                                                                        | 1  | 1 | S04 |
| .....ccaaauguagacaaagcaaaac.....                                                                          | 3  | 0 | S04 |
| .....ccaaauguagacaaagcaaaaU.....                                                                          | 2  | 1 | S04 |
| .....ccaaauguagacaaagcaaaacU.....                                                                         | 1  | 1 | S04 |
| .....Naaauguagacaaagcaaaac.....                                                                           | 1  | 1 | S04 |
| .....caaUuguagacaaagcaaaac.....                                                                           | 1  | 1 | S04 |
| .....caaauguagacaaagcaaaUc.....                                                                           | 1  | 1 | S04 |
| .....caaauguagacaaagcaaaac.....                                                                           | 10 | 0 | S04 |
| .....caaauguagacaaagcaaaacU.....                                                                          | 3  | 1 | S04 |
| .....aauguagacaaagcaaaaccguga.....                                                                        | 1  | 0 | S04 |
| .....auguagacaaagcaaaaccguga.....                                                                         | 1  | 0 | S04 |

Provisional ID : chrC05\_1846419  
 Score total : 0  
 Score for star read(s) : -1.3  
 Score for read counts : 0  
 Score for mfe : 1.2  
 Score for randfold : 0  
 Score for cons. seed :  
 Total read count : 16  
 Mature read count : 13  
 Loop read count : 0  
 Star read count : 3

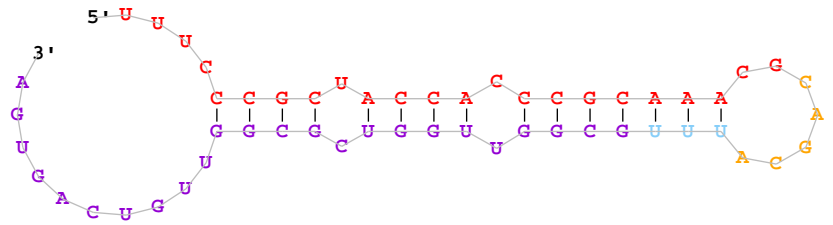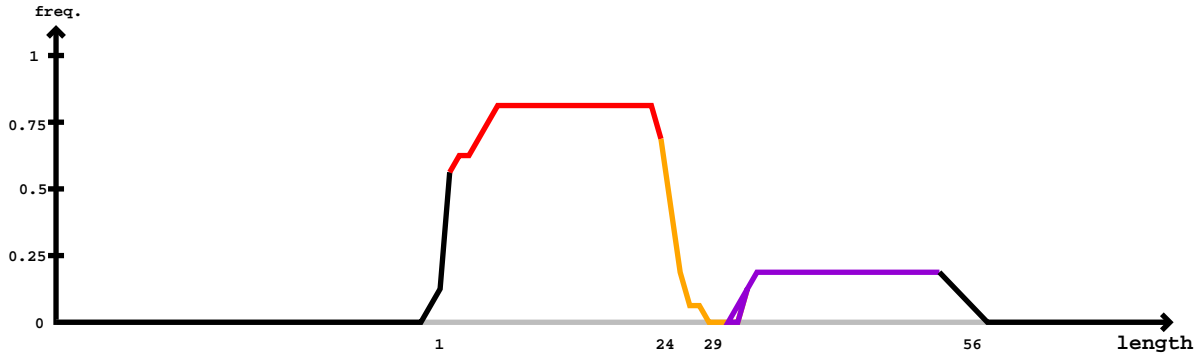

**Mature** **Star**

| 5' -                                                                                           | 3'                | obs | exp | reads | mm  | sample |
|------------------------------------------------------------------------------------------------|-------------------|-----|-----|-------|-----|--------|
| guuuuauugcuagcaaaguuaacuaaggggaugaccgguuuucccgcuaccaccgcaaacgagcauuugcggguugucgcgguugucagugauc | cgcaacaaucuccaaac | 2   | 0   | 0     | S03 |        |
| guuuuauugcuagcaaaguuaacuaaggggaugaccgguuuucccgcuaccaccgcaaacgagcauuugcggguugucgcgguugucaguga   | cgcaacaaucuccaaac | 1   | 0   | 0     | S03 |        |
| uuucccgcuaccaccgcaaacgca                                                                       |                   | 1   | 0   | 0     | S03 |        |
| cgcuaccaccgcaaacgca                                                                            |                   | 1   | 0   | 0     | S03 |        |
| gcggguugucgcgguugucaguga                                                                       |                   | 1   | 0   | 0     | S03 |        |
| guuuucccgcuaccaccgcaaac                                                                        |                   | 1   | 0   | 0     | S04 |        |
| uuucccgcuaccaccgcaaac                                                                          |                   | 1   | 0   | 0     | S04 |        |
| uuucccgcuaccaccgcaaacg                                                                         |                   | 4   | 0   | 0     | S04 |        |
| uuucccgcuaccaccgcaaacgca                                                                       |                   | 1   | 0   | 0     | S04 |        |
| cccgcuaccaccgcaaacgagc                                                                         |                   | 1   | 0   | 0     | S04 |        |
| cgcuaccaccgcaaacgca                                                                            |                   | 1   | 0   | 0     | S04 |        |
| gcggguugucgcgguugucaguga                                                                       |                   | 1   | 0   | 0     | S04 |        |
| cgguugucgcgguugucaguga                                                                         |                   | 1   | 0   | 0     | S04 |        |

Provisional ID : chrC05\_1862700  
 Score total : 184.9  
 Score for star read(s) : 3.9  
 Score for read counts : 180.1  
 Score for mfe : 0.9  
 Score for randfold : 0  
 Score for cons. seed :  
 Total read count : 365  
 Mature read count : 353  
 Loop read count : 3  
 Star read count : 9

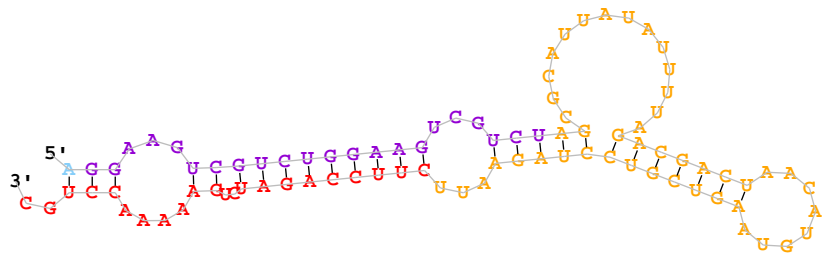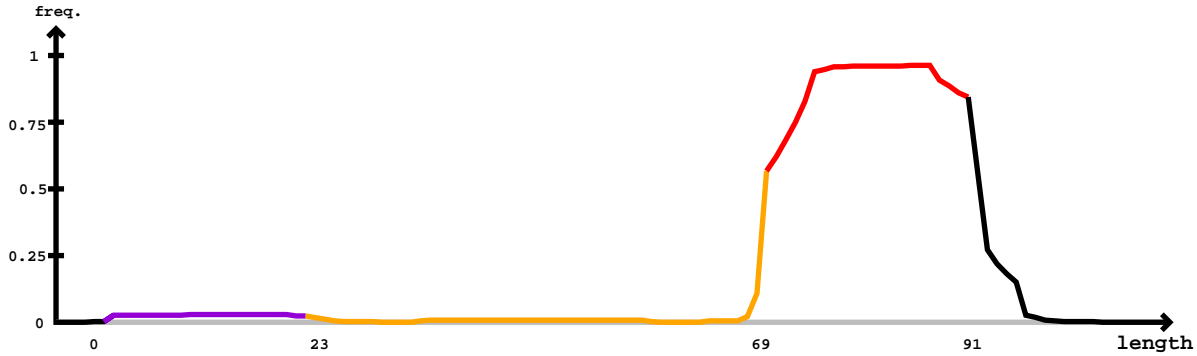

**Star**

**Mature**

| 5' -                                | 3' -                             | obs                              | exp                              | reads | mm | sample |
|-------------------------------------|----------------------------------|----------------------------------|----------------------------------|-------|----|--------|
| uccaggaagucgucuggaagucgucuagcgc     | cauuuuuuuagacgacuaacauguaagucguc | cauuuuuuuagacgacuaacauguaagucguc | cauuuuuuuagacgacuaacauguaagucguc | 1     | 1  | S03    |
| uccaggaagucgucuggaagucgucuagcgc     | cauuuuuuuagacgacuaacauguaagucguc | cauuuuuuuagacgacuaacauguaagucguc | cauuuuuuuagacgacuaacauguaagucguc | 1     | 0  | S03    |
| ..(((..(((.....(((.....))))))))))   | .....                            | .....                            | .....                            | 1     | 0  | S03    |
| ..caggaagucgucuggaagGcgucu.....     | .....                            | .....                            | .....                            | 1     | 0  | S03    |
| ...ggaagucgucuggaagucg.....         | .....                            | .....                            | .....                            | 1     | 0  | S03    |
| ...ggaagucgucuggaagucguc.....       | .....                            | .....                            | .....                            | 3     | 0  | S03    |
| .....ucuggaagucgucuagcgca.....      | .....                            | .....                            | .....                            | 1     | 0  | S03    |
| .....uuuagacgacuaacauguaaguU.....   | .....                            | .....                            | .....                            | 1     | 1  | S03    |
| .....uucccagaucugaaaaacUugc.....    | .....                            | .....                            | .....                            | 1     | 1  | S03    |
| .....ucucccagaucugaaaaac.....       | .....                            | .....                            | .....                            | 1     | 0  | S03    |
| .....ucucccagaucugaaaaaccu.....     | .....                            | .....                            | .....                            | 1     | 0  | S03    |
| .....ucucccagaucugaaaaaccG.....     | .....                            | .....                            | .....                            | 1     | 1  | S03    |
| .....ucucccagaucugaaaaaccugc.....   | .....                            | .....                            | .....                            | 4     | 0  | S03    |
| .....ucucccagaucugaaaaaccugca.....  | .....                            | .....                            | .....                            | 6     | 0  | S03    |
| .....cuucccagaucugaaaaac.....       | .....                            | .....                            | .....                            | 8     | 0  | S03    |
| .....cuucccagaucugaaaaacc.....      | .....                            | .....                            | .....                            | 3     | 0  | S03    |
| .....cuucccagaucugaaaaaccu.....     | .....                            | .....                            | .....                            | 2     | 0  | S03    |
| .....cuucccagaucugaaaaaccA.....     | .....                            | .....                            | .....                            | 1     | 1  | S03    |
| .....cuucccagaucugaaaaaccug.....    | .....                            | .....                            | .....                            | 3     | 0  | S03    |
| .....Nuucccagaucugaaaaaccugc.....   | .....                            | .....                            | .....                            | 2     | 1  | S03    |
| .....cuucccagaucugaaaaaccugc.....   | .....                            | .....                            | .....                            | 79    | 0  | S03    |
| .....cuCccagaucugaaaaaccugc.....    | .....                            | .....                            | .....                            | 1     | 1  | S03    |
| .....cuucccagCcugaaaaaccugc.....    | .....                            | .....                            | .....                            | 1     | 1  | S03    |
| .....cuucccagaucugaaaaaccugG.....   | .....                            | .....                            | .....                            | 1     | 1  | S03    |
| .....cuucccagaucugaaaaaccugcG.....  | .....                            | .....                            | .....                            | 1     | 1  | S03    |
| .....cuucccagaucugaaaaaccAgca.....  | .....                            | .....                            | .....                            | 1     | 1  | S03    |
| .....cuucccagaucugaaaaaccugca.....  | .....                            | .....                            | .....                            | 2     | 0  | S03    |
| .....cuucccagaucugaaaaaccugcau..... | .....                            | .....                            | .....                            | 3     | 0  | S03    |
| .....uucccagaucugaaaaaccugc.....    | .....                            | .....                            | .....                            | 1     | 0  | S03    |
| .....uucccagaucugaaaaaccugca.....   | .....                            | .....                            | .....                            | 2     | 0  | S03    |
| .....uucccagaucugaaaaaccugcau.....  | .....                            | .....                            | .....                            | 1     | 0  | S03    |
| .....uucccagaucugaaaaaccugcUua..... | .....                            | .....                            | .....                            | 1     | 1  | S03    |
| .....ucccagaucugaaaaaccugc.....     | .....                            | .....                            | .....                            | 1     | 0  | S03    |
| .....ucccagaucugaaaaaccGugca.....   | .....                            | .....                            | .....                            | 1     | 1  | S03    |
| .....ucccagaucugaaaaaccugca.....    | .....                            | .....                            | .....                            | 1     | 0  | S03    |

Star

Mature

uccaggaagucgucuggaagucgucucagcgcauuauuuuuagacgacuaaacauguaagucgucucuaagaauucuccagaucugaaaaaccugcauauccaaauccaaucuga

|                                     |    |   |     |
|-------------------------------------|----|---|-----|
| .....uccagaucugaaaaaAcugcau.....    | 1  | 1 | S03 |
| .....uccagaucugaaaaaccugcau.....    | 1  | 0 | S03 |
| .....uccagaucugaaaaacGugcau.....    | 1  | 1 | S03 |
| .....uccagaucugaaaaaccugcauG.....   | 2  | 1 | S03 |
| .....uccagaucugaaaaaccugcauau.....  | 4  | 0 | S03 |
| .....uccagaucugaaaaaccugcauauC..... | 2  | 0 | S03 |
| .....ccagaucugaaaaaccugca.....      | 4  | 0 | S03 |
| .....ccagaucugaaaaaccugcauaC.....   | 1  | 1 | S03 |
| .....ccagaucugaaaaaccugcauauC.....  | 4  | 0 | S03 |
| .....cagaucugaaaaaccugca.....       | 2  | 0 | S03 |
| .....cagaucugaaaaaccugcau.....      | 1  | 0 | S03 |
| .....cagaucugaaaaaccugcaua.....     | 1  | 0 | S03 |
| .....cagaucugaaaaaccugcauau.....    | 1  | 0 | S03 |
| .....cagaucugaaaaaccugcauauC.....   | 7  | 0 | S03 |
| .....agaucugaaaaaccugca.....        | 3  | 0 | S03 |
| .....agaucugaaaaaccugcau.....       | 1  | 0 | S03 |
| .....agaucugaaaaaccugcaua.....      | 1  | 0 | S03 |
| .....agaucugaaaaaccugcauau.....     | 1  | 0 | S03 |
| .....agaucugaaaaaccugcauauC.....    | 9  | 0 | S03 |
| .....gaucugaaaaaccugcauaucca.....   | 1  | 0 | S03 |
| .....aucugaaaaaccugcaua.....        | 1  | 0 | S03 |
| .....Naccugcauauccaaaucca.....      | 1  | 1 | S03 |
| .....ggaagucgucuggaagucC.....       | 1  | 1 | S04 |
| .....ggaagucgucuggaagucgucuc.....   | 1  | 0 | S04 |
| .....ggaagucgucuggaagucgucucC.....  | 1  | 1 | S04 |
| .....ggaagucgucuggaagucgucucUg..... | 1  | 1 | S04 |
| .....auuuuagacgacuaaacauguaagu..... | 2  | 0 | S04 |
| .....agaaCucuuccagaucugaaaaac.....  | 1  | 1 | S04 |
| .....aUaauuuccagaucugaaaaac.....    | 1  | 1 | S04 |
| .....uucuuccagaucugaaaaacUug.....   | 1  | 1 | S04 |
| .....uucuuccagaucugaaaaacUugc.....  | 1  | 1 | S04 |
| .....uucuuccagaucugaaaaaccugc.....  | 3  | 0 | S04 |
| .....ucuuccagaucugaaaaac.....       | 1  | 0 | S04 |
| .....ucuuccagaucugaaaaacc.....      | 1  | 0 | S04 |
| .....ucuuccagaucugaaaaaccu.....     | 1  | 0 | S04 |
| .....ucuAccagaucugaaaaaccu.....     | 1  | 1 | S04 |
| .....ucuuccagaucugaaaaaccuC.....    | 1  | 1 | S04 |
| .....ucuuccagaucugaaaaaccugc.....   | 3  | 0 | S04 |
| .....ucuuccagaucugGaaaaccugca.....  | 1  | 1 | S04 |
| .....ucuuccagaucugaaaaaccugcC.....  | 1  | 1 | S04 |
| .....ucuuccagaucugaaaaaccugca.....  | 8  | 0 | S04 |
| .....ucuuccagaucugaaaaaccuCca.....  | 1  | 1 | S04 |
| .....ucuuccagaucugaaaaaccugcau..... | 1  | 0 | S04 |
| .....cuuccagaucugaaaaac.....        | 9  | 0 | S04 |
| .....cuuccagaucugaaaaacc.....       | 4  | 0 | S04 |
| .....cuuccagaucugaaaaaccA.....      | 1  | 1 | S04 |
| .....cuuccagaucugaaaaaccu.....      | 1  | 0 | S04 |
| .....cuuccagaucugaaaaaccugc.....    | 38 | 0 | S04 |
| .....cuuccagaucugaaaaaccugca.....   | 10 | 0 | S04 |
| .....cuuccagaucugaaaaaccugcau.....  | 3  | 0 | S04 |
| .....uuccagaucugaaaaaccug.....      | 1  | 0 | S04 |
| .....uuccagaucugaaaaaccugc.....     | 7  | 0 | S04 |
| .....uuccagaucugaaaaaccugca.....    | 1  | 0 | S04 |
| .....uuccagaucugaaaaaccugcau.....   | 2  | 0 | S04 |
| .....uuccagaucugaaaaaccugcaua.....  | 3  | 0 | S04 |
| .....uuccagaucugGaaaaccugcaua.....  | 1  | 1 | S04 |
| .....uccagaucugaaaaaccu.....        | 1  | 0 | S04 |
| .....uccagaucugaaaaaccugc.....      | 1  | 0 | S04 |
| .....uccagaucugaaaaaccugca.....     | 2  | 0 | S04 |
| .....uccagaucugaaaaaccugcaua.....   | 2  | 0 | S04 |
| .....uccagaucugUaaaaccugcauau.....  | 1  | 1 | S04 |
| .....uccagaucugaaaaaccugcauau.....  | 1  | 0 | S04 |
| .....uccagaucugaaaaaccugcauauC..... | 2  | 0 | S04 |
| .....ccagaucugaaaaaccugca.....      | 14 | 0 | S04 |
| .....ccagaucugaaaaaccugcauauC.....  | 2  | 0 | S04 |
| .....cagaucugaaaaaccugc.....        | 3  | 0 | S04 |
| .....cagaucugaaaaaccugca.....       | 7  | 0 | S04 |
| .....cagaucugaaaaaccugcau.....      | 1  | 0 | S04 |
| .....cagaucugaaaaaccugcaua.....     | 2  | 0 | S04 |

Star

Mature

|                                                                                                         |    |   |     |
|---------------------------------------------------------------------------------------------------------|----|---|-----|
| uccaggaagucgucuggaagucgucugcgcauuuuuuuagacgacuaacauguaagucguccuagaauuuccagaucugaaaaaccugcauauccaaaucuga |    |   |     |
| .....cgaucugaaaaaccugcauau.....                                                                         | 1  | 0 | S04 |
| .....cgaucugaaaaaccugcauauG.....                                                                        | 1  | 1 | S04 |
| .....cgaucugaaaaaccugcauauC.....                                                                        | 3  | 0 | S04 |
| .....cgaucugaaaaaccugca.....                                                                            | 2  | 0 | S04 |
| .....cgaucugaaaaaccugcau.....                                                                           | 2  | 0 | S04 |
| .....cgaucugaaaaaccugcauau.....                                                                         | 2  | 0 | S04 |
| .....cgaucugaaaaaccugcauauC.....                                                                        | 17 | 0 | S04 |
| .....cgaucugaaaaaccugcauauCC.....                                                                       | 3  | 0 | S04 |
| .....cgaucugaaaaaccugcauauCCa.....                                                                      | 1  | 0 | S04 |
| .....cgaucugaaaaaccugcau.....                                                                           | 2  | 0 | S04 |
| .....cgaucugaaaaaccugcauaucca.....                                                                      | 1  | 0 | S04 |
| .....cgaucugaaaaaccugcauauccCa.....                                                                     | 1  | 1 | S04 |
| .....cgaucugaaaaaccugcauauccaaa.....                                                                    | 1  | 0 | S04 |
| .....cgaucugaaaaaccugcauaucca.....                                                                      | 1  | 0 | S04 |





Provisional ID : chrC05\_1885533  
 Score total : 0.2  
 Score for star read(s) : -1.3  
 Score for read counts : 0  
 Score for mfe : 1.5  
 Score for randfold : 0  
 Score for cons. seed :  
 Total read count : 1294  
 Mature read count : 1282  
 Loop read count : 0  
 Star read count : 12

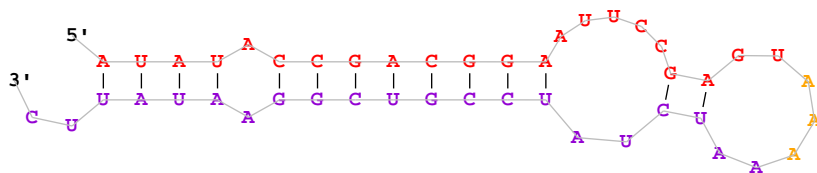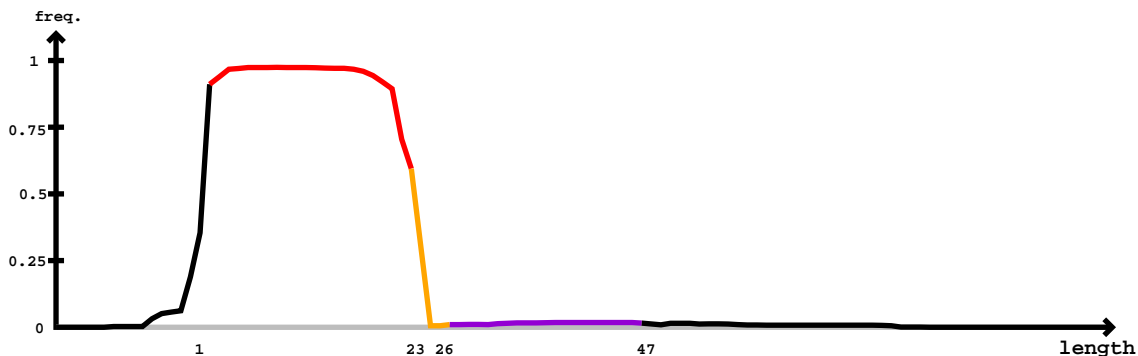

**Mature**                      **Star**

| 5' -                               |                                    | -3'                                | obs                                | exp                                | reads | mm | sample |
|------------------------------------|------------------------------------|------------------------------------|------------------------------------|------------------------------------|-------|----|--------|
| uugguuucccugga                     | auauaccgacggaauuccgagua            | aaaaucuaucggcggaaauucuuauuggaauc   | cgaggaaaaugua                      | ucccuggaaaaaugcgaugaa              | 1     | 0  | S03    |
| uugguuucccugga                     | auauaccgacggaauuccgagua            | aaaaucuaucggcggaaauucuuauuggaauc   | cgaggaaaaugua                      | ucccuggaaaaaugcgaugaa              | 1     | 0  | S03    |
| .....(((((((.....)))))).....)      | .....(((((((.....)))))).....)      | .....(((((((.....)))))).....)      | .....(((((((.....)))))).....)      | .....(((((((.....)))))).....)      | 12    | 0  | S03    |
| .....cucggaauauaccgacggaau.....    | .....cucggaauauaccgacggaau.....    | .....cucggaauauaccgacggaau.....    | .....cucggaauauaccgacggaau.....    | .....cucggaauauaccgacggaau.....    | 1     | 1  | S03    |
| .....cucggaauauaccgacggaauucc..... | .....cucggaauauaccgacggaauucc..... | .....cucggaauauaccgacggaauucc..... | .....cucggaauauaccgacggaauucc..... | .....cucggaauauaccgacggaauucc..... | 1     | 0  | S03    |
| .....ucggaauauaccgacggaau.....     | .....ucggaauauaccgacggaau.....     | .....ucggaauauaccgacggaau.....     | .....ucggaauauaccgacggaau.....     | .....ucggaauauaccgacggaau.....     | 1     | 0  | S03    |
| .....ucggaauauaccgacggaau.....     | .....ucggaauauaccgacggaau.....     | .....ucggaauauaccgacggaau.....     | .....ucggaauauaccgacggaau.....     | .....ucggaauauaccgacggaau.....     | 7     | 0  | S03    |
| .....ucggaauauaccgacggaauucc.....  | .....ucggaauauaccgacggaauucc.....  | .....ucggaauauaccgacggaauucc.....  | .....ucggaauauaccgacggaauucc.....  | .....ucggaauauaccgacggaauucc.....  | 3     | 0  | S03    |
| .....ucggaauauaccgacggaauucc.....  | .....ucggaauauaccgacggaauucc.....  | .....ucggaauauaccgacggaauucc.....  | .....ucggaauauaccgacggaauucc.....  | .....ucggaauauaccgacggaauucc.....  | 1     | 1  | S03    |
| .....cggaauauaccgacggaau.....      | .....cggaauauaccgacggaau.....      | .....cggaauauaccgacggaau.....      | .....cggaauauaccgacggaau.....      | .....cggaauauaccgacggaau.....      | 1     | 0  | S03    |
| .....cggaauauaccgacggaauucc.....   | .....cggaauauaccgacggaauucc.....   | .....cggaauauaccgacggaauucc.....   | .....cggaauauaccgacggaauucc.....   | .....cggaauauaccgacggaauucc.....   | 2     | 0  | S03    |
| .....ggaauauaccgacggaau.....       | .....ggaauauaccgacggaau.....       | .....ggaauauaccgacggaau.....       | .....ggaauauaccgacggaau.....       | .....ggaauauaccgacggaau.....       | 1     | 0  | S03    |
| .....ggaauauaccgacggaauuccgag..... | .....ggaauauaccgacggaauuccgag..... | .....ggaauauaccgacggaauuccgag..... | .....ggaauauaccgacggaauuccgag..... | .....ggaauauaccgacggaauuccgag..... | 1     | 1  | S03    |
| .....ggaauauaccgacggaauuccgag..... | .....ggaauauaccgacggaauuccgag..... | .....ggaauauaccgacggaauuccgag..... | .....ggaauauaccgacggaauuccgag..... | .....ggaauauaccgacggaauuccgag..... | 6     | 0  | S03    |
| .....gaaCauaccgacggaauuccga.....   | .....gaaCauaccgacggaauuccga.....   | .....gaaCauaccgacggaauuccga.....   | .....gaaCauaccgacggaauuccga.....   | .....gaaCauaccgacggaauuccga.....   | 1     | 1  | S03    |
| .....gaaauuaccgacggaauuccga.....   | .....gaaauuaccgacggaauuccga.....   | .....gaaauuaccgacggaauuccga.....   | .....gaaauuaccgacggaauuccga.....   | .....gaaauuaccgacggaauuccga.....   | 41    | 0  | S03    |
| .....gaaauuaccgacggaauAccga.....   | .....gaaauuaccgacggaauAccga.....   | .....gaaauuaccgacggaauAccga.....   | .....gaaauuaccgacggaauAccga.....   | .....gaaauuaccgacggaauAccga.....   | 1     | 1  | S03    |
| .....gaaauuaccgacggaauuccgG.....   | .....gaaauuaccgacggaauuccgG.....   | .....gaaauuaccgacggaauuccgG.....   | .....gaaauuaccgacggaauuccgG.....   | .....gaaauuaccgacggaauuccgG.....   | 6     | 1  | S03    |
| .....gaaauuaccgacggaauuccgag.....  | .....gaaauuaccgacggaauuccgag.....  | .....gaaauuaccgacggaauuccgag.....  | .....gaaauuaccgacggaauuccgag.....  | .....gaaauuaccgacggaauuccgag.....  | 14    | 0  | S03    |
| .....gaaauuUccgacggaauuccgagu..... | .....gaaauuUccgacggaauuccgagu..... | .....gaaauuUccgacggaauuccgagu..... | .....gaaauuUccgacggaauuccgagu..... | .....gaaauuUccgacggaauuccgagu..... | 3     | 1  | S03    |
| .....gaaauuaccgacggaauuccgagC..... | .....gaaauuaccgacggaauuccgagC..... | .....gaaauuaccgacggaauuccgagC..... | .....gaaauuaccgacggaauuccgagC..... | .....gaaauuaccgacggaauuccgagC..... | 1     | 1  | S03    |
| .....gaaauuaccgacggaauuccgagu..... | .....gaaauuaccgacggaauuccgagu..... | .....gaaauuaccgacggaauuccgagu..... | .....gaaauuaccgacggaauuccgagu..... | .....gaaauuaccgacggaauuccgagu..... | 6     | 0  | S03    |
| .....aaauuaccgacggaauuccg.....     | .....aaauuaccgacggaauuccg.....     | .....aaauuaccgacggaauuccg.....     | .....aaauuaccgacggaauuccg.....     | .....aaauuaccgacggaauuccg.....     | 5     | 0  | S03    |
| .....aaauuaccgCcggaauuccg.....     | .....aaauuaccgCcggaauuccg.....     | .....aaauuaccgCcggaauuccg.....     | .....aaauuaccgCcggaauuccg.....     | .....aaauuaccgCcggaauuccg.....     | 1     | 1  | S03    |
| .....aaauuaccgacggaauuccga.....    | .....aaauuaccgacggaauuccga.....    | .....aaauuaccgacggaauuccga.....    | .....aaauuaccgacggaauuccga.....    | .....aaauuaccgacggaauuccga.....    | 32    | 0  | S03    |
| .....aaauuaccgacggaauCccgag.....   | .....aaauuaccgacggaauCccgag.....   | .....aaauuaccgacggaauCccgag.....   | .....aaauuaccgacggaauCccgag.....   | .....aaauuaccgacggaauCccgag.....   | 1     | 1  | S03    |
| .....aaauuaccgacggaauuccgag.....   | .....aaauuaccgacggaauuccgag.....   | .....aaauuaccgacggaauuccgag.....   | .....aaauuaccgacggaauuccgag.....   | .....aaauuaccgacggaauuccgag.....   | 30    | 0  | S03    |
| .....aaauuaccgacggaauuccgagu.....  | .....aaauuaccgacggaauuccgagu.....  | .....aaauuaccgacggaauuccgagu.....  | .....aaauuaccgacggaauuccgagu.....  | .....aaauuaccgacggaauuccgagu.....  | 9     | 0  | S03    |
| .....aaauuaccgacggaauuccgagC.....  | .....aaauuaccgacggaauuccgagC.....  | .....aaauuaccgacggaauuccgagC.....  | .....aaauuaccgacggaauuccgagC.....  | .....aaauuaccgacggaauuccgagC.....  | 2     | 1  | S03    |
| .....aaauuaccgacggaauuccgaUu.....  | .....aaauuaccgacggaauuccgaUu.....  | .....aaauuaccgacggaauuccgaUu.....  | .....aaauuaccgacggaauuccgaUu.....  | .....aaauuaccgacggaauuccgaUu.....  | 1     | 1  | S03    |
| .....aaauuaccgacAgaauuccgagu.....  | .....aaauuaccgacAgaauuccgagu.....  | .....aaauuaccgacAgaauuccgagu.....  | .....aaauuaccgacAgaauuccgagu.....  | .....aaauuaccgacAgaauuccgagu.....  | 1     | 1  | S03    |
| .....aaauuUccgacggaauuccgagu.....  | .....aaauuUccgacggaauuccgagu.....  | .....aaauuUccgacggaauuccgagu.....  | .....aaauuUccgacggaauuccgagu.....  | .....aaauuUccgacggaauuccgagu.....  | 15    | 1  | S03    |



Mature

Star

|                                                                                                                                                                       |     |   |     |
|-----------------------------------------------------------------------------------------------------------------------------------------------------------------------|-----|---|-----|
| uugguuucccggaa <u>auuacccgacggaa<u>uuccgaguu</u>aa<u>aaucuauc</u>ccgucggaa<u>uuuu</u>uugga<u>uuac</u>ccgaggaaaa<u>u</u>g<u>uu</u>ccucggaaaa<u>uu</u>g<u>cg</u>gaa</u> |     |   |     |
| .....auuacccgacggaa <u>uuccg</u> .....                                                                                                                                | 5   | 0 | S03 |
| .....auuacccgacggaa <u>uuccU</u> a.....                                                                                                                               | 1   | 1 | S03 |
| .....auuacccgacggaa <u>uuccg</u> a.....                                                                                                                               | 28  | 0 | S03 |
| .....auuacccgacggaa <u>uuccg</u> ag.....                                                                                                                              | 15  | 0 | S03 |
| .....auuacccgacggaa <u>uuccgU</u> gu.....                                                                                                                             | 1   | 1 | S03 |
| .....auuacccgacggaa <u>uuccg</u> Uu.....                                                                                                                              | 4   | 1 | S03 |
| .....au <u>G</u> uacccgacggaa <u>uuccg</u> agu.....                                                                                                                   | 1   | 1 | S03 |
| .....auuacccgac <u>A</u> gaa <u>uuccg</u> agu.....                                                                                                                    | 1   | 1 | S03 |
| .....auuac <u>G</u> gacggaa <u>uuccg</u> agu.....                                                                                                                     | 1   | 1 | S03 |
| .....auu <u>U</u> ccgacggaa <u>uuccg</u> agu.....                                                                                                                     | 273 | 1 | S03 |
| .....auuacccgacggaa <u>uuccU</u> gagu.....                                                                                                                            | 2   | 1 | S03 |
| .....a <u>C</u> auacccgacggaa <u>uuccg</u> agu.....                                                                                                                   | 1   | 1 | S03 |
| .....auuacccgacggaa <u>uuccg</u> ag <u>C</u> .....                                                                                                                    | 20  | 1 | S03 |
| .....auuacccgacggaa <u>G</u> uccgagu.....                                                                                                                             | 1   | 1 | S03 |
| .....auuacccgacggaa <u>uuccg</u> agu.....                                                                                                                             | 124 | 0 | S03 |
| .....auu <u>C</u> cgacggaa <u>uuccg</u> agu.....                                                                                                                      | 2   | 1 | S03 |
| .....auuacccgacgg <u>G</u> auuccgagu.....                                                                                                                             | 21  | 1 | S03 |
| .....auuac <u>U</u> gacggaa <u>uuccg</u> agu.....                                                                                                                     | 1   | 1 | S03 |
| .....auuacccgacggaa <u>uuccg</u> ag <u>A</u> u.....                                                                                                                   | 1   | 1 | S03 |
| .....auuacccg <u>G</u> cgaa <u>uuccg</u> agu.....                                                                                                                     | 1   | 1 | S03 |
| .....auuacccgacggaa <u>uuccg</u> agu <u>U</u> .....                                                                                                                   | 1   | 1 | S03 |
| .....uauacccgacggaa <u>uuccg</u> a.....                                                                                                                               | 5   | 0 | S03 |
| .....uauacccgacggaa <u>uuccg</u> ag.....                                                                                                                              | 3   | 0 | S03 |
| .....uau <u>U</u> ccgacggaa <u>uuccg</u> agu.....                                                                                                                     | 10  | 1 | S03 |
| .....uauacccgacggaa <u>uuccg</u> agu.....                                                                                                                             | 5   | 0 | S03 |
| .....uauacccgacggaa <u>uuccg</u> agu <u>U</u> .....                                                                                                                   | 1   | 1 | S03 |
| .....auacccgacggaa <u>uuccg</u> a.....                                                                                                                                | 3   | 0 | S03 |
| .....auacccgacggaa <u>uuccg</u> ag.....                                                                                                                               | 1   | 0 | S03 |
| .....auacccgacggaa <u>uuccg</u> agu.....                                                                                                                              | 5   | 0 | S03 |
| .....au <u>C</u> cgacggaa <u>uuccg</u> agu.....                                                                                                                       | 1   | 1 | S03 |
| .....au <u>U</u> ccgacggaa <u>uuccg</u> agu.....                                                                                                                      | 4   | 1 | S03 |
| .....accgacggaa <u>uuccg</u> ag <u>C</u> u.....                                                                                                                       | 2   | 1 | S03 |
| .....accgacggaa <u>uuccg</u> agu.....                                                                                                                                 | 1   | 0 | S03 |
| .....aa <u>C</u> au <u>u</u> acccgucggaa <u>uu</u> .....                                                                                                              | 1   | 1 | S03 |
| .....aa <u>C</u> au <u>u</u> acccgucggaa <u>uu</u> ac.....                                                                                                            | 1   | 1 | S03 |
| .....aa <u>U</u> ac <u>u</u> acccgucggaa <u>uu</u> ac <u>u</u> .....                                                                                                  | 1   | 1 | S03 |
| .....aauc <u>A</u> uacccgucggaa <u>uu</u> .....                                                                                                                       | 1   | 1 | S03 |
| .....aauc <u>A</u> uacccgucggaa <u>uu</u> ac.....                                                                                                                     | 3   | 1 | S03 |
| .....auc <u>G</u> auacccgucggaa <u>uu</u> ac <u>u</u> .....                                                                                                           | 1   | 1 | S03 |
| .....auccgucggaa <u>uu</u> ac <u>uu</u> aug.....                                                                                                                      | 1   | 0 | S03 |
| .....uccgucggaa <u>uu</u> ac <u>uu</u> augga <u>u</u> .....                                                                                                           | 1   | 0 | S03 |
| .....uccgucggaa <u>uu</u> ac <u>uu</u> Auga <u>u</u> .....                                                                                                            | 1   | 1 | S03 |
| .....cgaa <u>uu</u> ac <u>uu</u> augga <u>u</u> .....                                                                                                                 | 1   | 0 | S03 |
| .....uugga <u>uu</u> acccgagaaaa <u>u</u> g <u>u</u> a.....                                                                                                           | 1   | 0 | S03 |
| .....augga <u>uu</u> acccgagaaaa <u>u</u> g <u>u</u> a <u>C</u> .....                                                                                                 | 1   | 1 | S03 |
| .....augga <u>uu</u> acccgagaaaa <u>u</u> g <u>u</u> au.....                                                                                                          | 1   | 0 | S03 |
| .....uuuccgga <u>uu</u> ac <u>C</u> .....                                                                                                                             | 1   | 1 | S04 |
| .....uuuccgga <u>uu</u> ac <u>cg</u> acg.....                                                                                                                         | 1   | 0 | S04 |
| .....uuuccgga <u>uu</u> ac <u>cg</u> acgg.....                                                                                                                        | 2   | 0 | S04 |
| .....cucgga <u>uu</u> ac <u>cg</u> acgga.....                                                                                                                         | 1   | 0 | S04 |
| .....cucgga <u>C</u> auac <u>cg</u> acgga <u>u</u> .....                                                                                                              | 1   | 1 | S04 |
| .....cucgga <u>uu</u> ac <u>cg</u> acgga <u>uu</u> .....                                                                                                              | 3   | 0 | S04 |
| .....cucgga <u>uu</u> ac <u>cg</u> acgga <u>uu</u> ac.....                                                                                                            | 3   | 0 | S04 |
| .....cucgga <u>uu</u> ac <u>cg</u> acgga <u>uu</u> acc.....                                                                                                           | 17  | 0 | S04 |
| .....cucgga <u>uu</u> ac <u>cg</u> acgga <u>uu</u> acc <u>U</u> .....                                                                                                 | 1   | 1 | S04 |
| .....ucgga <u>uu</u> ac <u>cg</u> acgga <u>u</u> .....                                                                                                                | 1   | 0 | S04 |
| .....ucgga <u>uu</u> ac <u>cg</u> acgga <u>u</u> A.....                                                                                                               | 1   | 1 | S04 |
| .....ucgga <u>uu</u> ac <u>cg</u> acgga <u>uu</u> .....                                                                                                               | 3   | 0 | S04 |
| .....ucgga <u>uu</u> ac <u>cg</u> acgga <u>uu</u> ac.....                                                                                                             | 6   | 0 | S04 |
| .....ucgga <u>uu</u> ac <u>cg</u> acgga <u>uu</u> acc.....                                                                                                            | 2   | 0 | S04 |
| .....ucgga <u>uu</u> ac <u>cg</u> acgga <u>uu</u> acc <u>C</u> .....                                                                                                  | 1   | 1 | S04 |
| .....cgga <u>uu</u> ac <u>cg</u> acgga <u>uu</u> .....                                                                                                                | 1   | 0 | S04 |
| .....cgga <u>uu</u> ac <u>cg</u> acgga <u>uu</u> ac.....                                                                                                              | 4   | 0 | S04 |
| .....gga <u>uu</u> ac <u>cg</u> acgga <u>uu</u> accgga.....                                                                                                           | 1   | 0 | S04 |
| .....gga <u>uu</u> ac <u>cg</u> acgga <u>uu</u> accgag.....                                                                                                           | 1   | 0 | S04 |
| .....gga <u>uu</u> ac <u>cg</u> acgga <u>uu</u> accgagu.....                                                                                                          | 1   | 0 | S04 |
| .....gA <u>uu</u> ac <u>cg</u> acgga <u>uu</u> accgagu.....                                                                                                           | 1   | 1 | S04 |
| .....gaa <u>uu</u> ac <u>cg</u> acgga <u>uu</u> accg.....                                                                                                             | 5   | 0 | S04 |



Mature

Star

|                                                                                                                                                                           |   |   |     |
|---------------------------------------------------------------------------------------------------------------------------------------------------------------------------|---|---|-----|
| uugguuuccucgga <u>auauaccgacggaa</u> uuccgaguu <u>aaa</u> aaucua <u>uccgucgg</u> aa <u>uuuuuu</u> uugga <u>uac</u> cgaggaaaa <u>augua</u> uuccucgga <u>aaaa</u> ugcgaugaa |   |   |     |
| .....a <u>uccgucgg</u> aa <u>uuuuuu</u> uugga <u>uac</u> A.....                                                                                                           | 1 | 1 | S04 |
| ..... <u>ccgucgg</u> aa <u>uuuuuu</u> uugga <u>ua</u> .....                                                                                                               | 2 | 0 | S04 |
| ..... <u>ucgga</u> uu <u>uuuuuu</u> uugga <u>uu</u> .....                                                                                                                 | 1 | 0 | S04 |
| ..... <u>uuu</u> uugga <u>uac</u> cgagg <u>aaaa</u> u <u>gu</u> .....                                                                                                     | 1 | 0 | S04 |
| ..... <u>augga</u> uu <u>ac</u> cgagg <u>aaaa</u> u <u>gua</u> .....                                                                                                      | 1 | 0 | S04 |
| ..... <u>augga</u> uu <u>ac</u> cgagg <u>aaaa</u> u <u>guau</u> .....                                                                                                     | 4 | 0 | S04 |
| ..... <u>augga</u> uu <u>ac</u> cgagg <u>G</u> aaaa <u>guau</u> .....                                                                                                     | 1 | 1 | S04 |
| ..... <u>aa</u> u <u>accgagg</u> aaaa <u>augua</u> u <u>ucU</u> .....                                                                                                     | 1 | 1 | S04 |



Provisional ID : chrC05\_1891116  
 Score total : 268.8  
 Score for star read(s) : 3.9  
 Score for read counts : 263.2  
 Score for mfe : 1.7  
 Score for randfold : 0  
 Score for cons. seed :  
 Total read count : 528  
 Mature read count : 521  
 Loop read count : 1  
 Star read count : 6

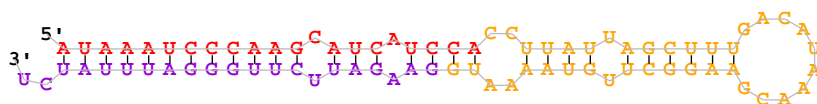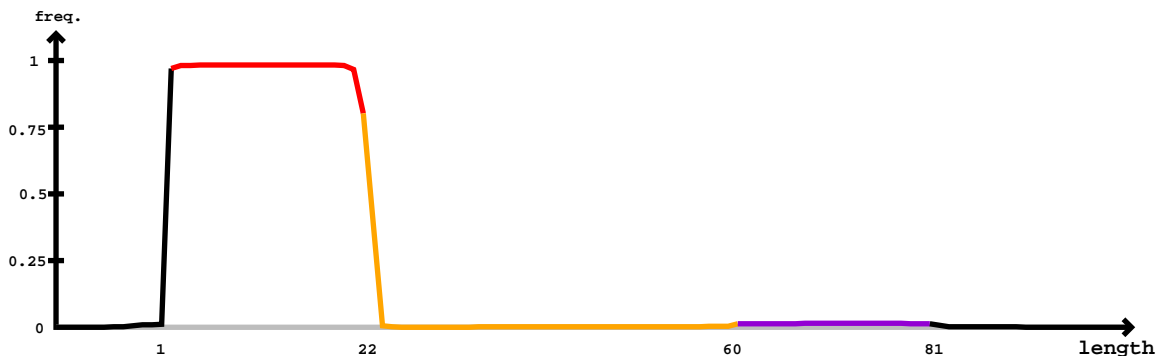

**Mature**

**Star**

| 5' -                                                                                                                                          | obs   | mm  | sample |
|-----------------------------------------------------------------------------------------------------------------------------------------------|-------|-----|--------|
| ugauaacaagauaaa <u>uccaagcaucaucca</u> ccuuuuuagcuuugacauaaa <u>cgaggcuuguaaaaug</u> gaagauuc <u>uggg</u> auuu <u>aucuuuu</u> guagucuccucucua | -3'   | exp |        |
| .....gaaaaucccaagcaucaucA.....                                                                                                                | reads | 1   | S03    |
| .....aauuuucccaagcaucauc.....                                                                                                                 | 3     | 0   | S03    |
| .....aauuuucccaagcaucaucc.....                                                                                                                | 18    | 0   | S03    |
| .....aauuuucccaagcaucaucG.....                                                                                                                | 1     | 1   | S03    |
| .....aauuuucccaagcaucaucA.....                                                                                                                | 1     | 1   | S03    |
| .....Nuauuuucccaagcaucaucc.....                                                                                                               | 1     | 1   | S03    |
| .....aauuuucccaagcaucaucU.....                                                                                                                | 5     | 1   | S03    |
| .....aauuuucccaagGaucaucca.....                                                                                                               | 1     | 1   | S03    |
| .....aauuuucccaagcaucaucca.....                                                                                                               | 123   | 0   | S03    |
| .....auGauuuucccaagcaucaucca.....                                                                                                             | 1     | 1   | S03    |
| .....aauuuucccaagcaucauccC.....                                                                                                               | 5     | 1   | S03    |
| .....aauuuucccaagcaCcaucca.....                                                                                                               | 1     | 1   | S03    |
| .....aauuuucccGagcaucaucca.....                                                                                                               | 1     | 1   | S03    |
| .....aauuuucccaagcaucauccG.....                                                                                                               | 7     | 1   | S03    |
| .....aauuuucccaagcaucauccU.....                                                                                                               | 2     | 1   | S03    |
| .....auaUauuuucccaagcaucaucca.....                                                                                                            | 1     | 1   | S03    |
| .....aauuuucccaagcaucGucca.....                                                                                                               | 1     | 1   | S03    |
| .....aauuuucccaagcaucauccaA.....                                                                                                              | 1     | 1   | S03    |
| .....uaauuuucccaagcaucaucc.....                                                                                                               | 1     | 0   | S03    |
| .....uaauuuucccaagcaucaucGa.....                                                                                                              | 1     | 1   | S03    |
| .....uugacauaaa <u>cgaggcuuguaaaaug</u> .....                                                                                                 | 1     | 0   | S03    |
| .....gaagauuc <u>uggg</u> auuu <u>aucuuuu</u> .....                                                                                           | 1     | 0   | S03    |
| .....aacaagauaaa <u>uccaagcaucaucca</u> .....                                                                                                 | 1     | 0   | S04    |
| .....caagauaaa <u>uccaagcaucaucca</u> .....                                                                                                   | 2     | 0   | S04    |
| .....aagauaaa <u>uccaagcaucauccG</u> .....                                                                                                    | 1     | 1   | S04    |
| .....aagauaaa <u>uccaagcaucauccaU</u> .....                                                                                                   | 1     | 1   | S04    |
| .....aauuuucccaagcaucaucG.....                                                                                                                | 1     | 1   | S04    |
| .....aauuuucccaagcaucauc.....                                                                                                                 | 5     | 0   | S04    |
| .....aauuuucccaagcaucaucc.....                                                                                                                | 39    | 0   | S04    |
| .....aauuuucccaagcaucUucc.....                                                                                                                | 1     | 1   | S04    |
| .....aCauuuucccaagcaucaucc.....                                                                                                               | 1     | 1   | S04    |
| .....aauuuucccaagcaucaucU.....                                                                                                                | 16    | 1   | S04    |

Mature

Star

|            |   |     |   |     |
|------------|---|-----|---|-----|
| ugauaacaag | a | 3   | 1 | S04 |
| .....a     | a | 1   | 1 | S04 |
| .....a     | a | 6   | 1 | S04 |
| .....a     | a | 1   | 1 | S04 |
| .....a     | a | 228 | 0 | S04 |
| .....a     | a | 2   | 1 | S04 |
| .....a     | a | 1   | 1 | S04 |
| .....a     | a | 1   | 1 | S04 |
| .....a     | a | 1   | 1 | S04 |
| .....a     | a | 18  | 1 | S04 |
| .....a     | a | 1   | 1 | S04 |
| .....a     | a | 8   | 1 | S04 |
| .....N     | a | 1   | 1 | S04 |
| .....a     | a | 1   | 1 | S04 |
| .....a     | a | 1   | 1 | S04 |
| .....a     | a | 1   | 1 | S04 |
| .....a     | a | 1   | 0 | S04 |
| .....u     | a | 3   | 0 | S04 |
| .....u     | a | 1   | 1 | S04 |
| .....a     | a | 1   | 0 | S04 |
| .....a     | a | 1   | 0 | S04 |
| .....a     | a | 3   | 0 | S04 |
| .....a     | a | 1   | 1 | S04 |
| .....c     | a | 1   | 0 | S04 |

Provisional ID : chrC05\_1891119  
 Score total : 40.6  
 Score for star read(s) : 3.9  
 Score for read counts : 35.8  
 Score for mfe : 0.9  
 Score for randfold : 0  
 Score for cons. seed :  
 Total read count : 82  
 Mature read count : 53  
 Loop read count : 0  
 Star read count : 29

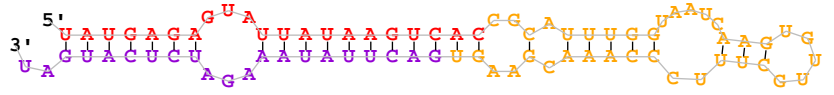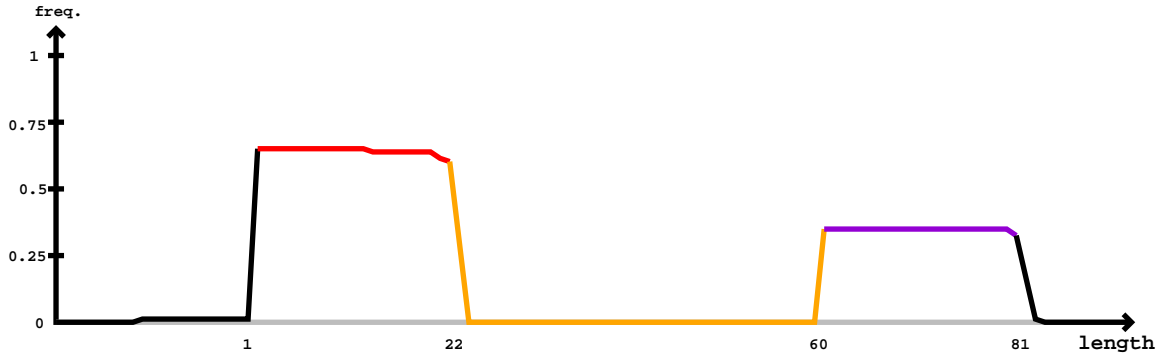

**Mature**

**Star**

| 5' -                                                                                                                     | obs   | mm | sample |
|--------------------------------------------------------------------------------------------------------------------------|-------|----|--------|
| aaguugcugaagauuuuu <u>uauagagaguauuuuaaagucac</u> cgcauuugguaaucaaguguugcuuuccaaaacgaagugacuuuaaaagaucucaugauuaaucgauuuu | reads | mm | sample |
| aaguugcugaagauuuuu <u>uauagagaguauuuuaaagucac</u> cgcauuugguaaucaaguguugcuuuccaaaacgaagugacuuuaaaagaucucaugauuaaucgauuuu | 1     | 0  | S03    |
| .....(((((((((.....(((((((((((((.....(((.....(((.....)))))))))))))))))))))).....                                         | 10    | 0  | S03    |
| .....ugaagauuuuuuauagagaguauu.....                                                                                       | 2     | 1  | S03    |
| .....uauagagaguauuuuaaagucac.....                                                                                        | 1     | 1  | S03    |
| .....uauagagaguauuuuaaagucac.....                                                                                        | 11    | 0  | S03    |
| .....gacuuuuGagaucucaugau.....                                                                                           | 1     | 1  | S03    |
| .....gacuuuaaaagaucucaugau.....                                                                                          | 3     | 0  | S03    |
| .....Uacuuuaaaagaucucaugau.....                                                                                          |       |    |        |
| .....gacuuuaaaagaucucaugauu.....                                                                                         |       |    |        |
| .....uauagagaguauuuuaaaguc.....                                                                                          | 2     | 0  | S04    |
| .....uauagagaguauuuuaaagucU.....                                                                                         | 1     | 1  | S04    |
| .....uauagagaguauuuuaaagucac.....                                                                                        | 1     | 1  | S04    |
| .....uauagagaguauuuuaaagucac.....                                                                                        | 32    | 0  | S04    |
| .....uauUagagaguauuuuaaagucac.....                                                                                       | 2     | 1  | S04    |
| .....uauagagaguauuuuaaagCcac.....                                                                                        | 1     | 1  | S04    |
| .....uauagagaguauuuuaaagucacA.....                                                                                       | 2     | 1  | S04    |
| .....gacuuuaaaagaucucauga.....                                                                                           | 2     | 0  | S04    |
| .....gacuuuaaaagaucucaugau.....                                                                                          | 7     | 0  | S04    |
| .....gacuuuaaaUgaucucaugau.....                                                                                          | 1     | 1  | S04    |
| .....gacuuuaaaagaucucaugac.....                                                                                          | 2     | 1  | S04    |
| .....gacuuuaaaagaucucaugauU.....                                                                                         | 1     | 1  | S04    |











Provisional ID : chrC05\_1901761  
 Score total : 290.4  
 Score for star read(s) : 3.9  
 Score for read counts : 284.1  
 Score for mfe : 2.4  
 Score for randfold : 0  
 Score for cons. seed :  
 Total read count : 569  
 Mature read count : 476  
 Loop read count : 0  
 Star read count : 93

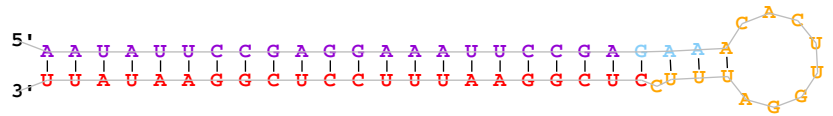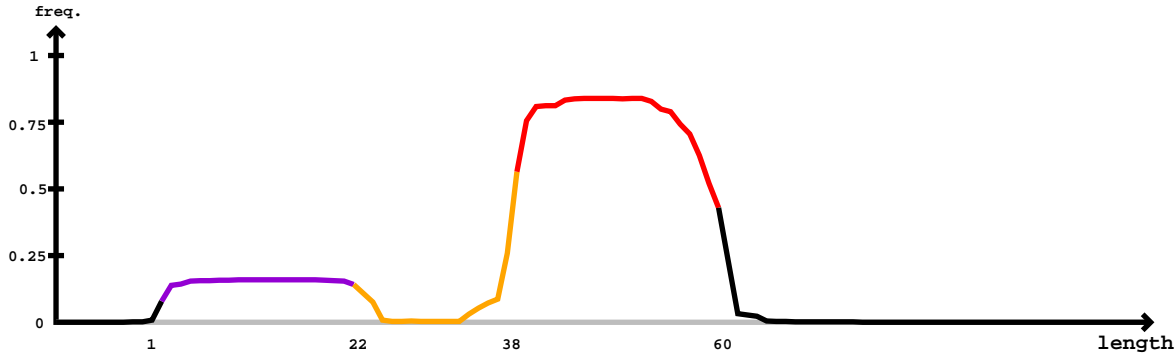

**Star** **Mature**

| 5' -                                                                                                            | obs | reads | mm | sample |
|-----------------------------------------------------------------------------------------------------------------|-----|-------|----|--------|
| aagccucggaauuuccgaggaauuuccgagaaacacuuggauuuucucggaauuuccuggaaauuucugagggcuuuuccgaggaacaaaaaccuccuaaaagaaagccuu | -3' |       |    |        |
| aagccucggaauuuccgaggaauuuccgagaaacacuuggauuuucucggaauuuccuggaaauuucugagggcuuuuccgaggaacaaaaaccuccuaaaagaaagccuu | exp |       |    |        |
| (((.....))).....(.....)                                                                                         |     |       |    |        |
| .....cggaaauuuccgaggaauu.....                                                                                   |     | 1     | 0  | S03    |
| .....gaaauuuccgaggaauuuccgga.....                                                                               |     | 1     | 0  | S03    |
| .....gaaauuuccgaggaauuuccgagU.....                                                                              |     | 2     | 1  | S03    |
| .....aaauuuccgaggaauuucc.....                                                                                   |     | 1     | 0  | S03    |
| .....aaauuuccgaggaauuuccg.....                                                                                  |     | 3     | 0  | S03    |
| .....aaauuuccgaggaauuuccgga.....                                                                                |     | 14    | 0  | S03    |
| .....aaauuuccgaggaauuuccgU.....                                                                                 |     | 1     | 1  | S03    |
| .....aaauuuccgaggaauuuccggaUa.....                                                                              |     | 1     | 1  | S03    |
| .....aaauuuccgaggaauuuccgagU.....                                                                               |     | 2     | 1  | S03    |
| .....aaauuuccgaggaauuuccgagCa.....                                                                              |     | 2     | 1  | S03    |
| .....aaauuuccgaggaauuuccgagCa.....                                                                              |     | 1     | 1  | S03    |
| .....aaauuuccgaggaauuuccgag.....                                                                                |     | 2     | 0  | S03    |
| .....aaauuuccgaggaauuuccgga.....                                                                                |     | 2     | 0  | S03    |
| .....aaauuuccgaggaauuuccgag.....                                                                                |     | 1     | 0  | S03    |
| .....aaauuuccgaggaauuuccgag.....                                                                                |     | 1     | 1  | S03    |
| .....aaauuuccgaggaauuuccgag.....                                                                                |     | 11    | 1  | S03    |
| .....aaauuuccgaggaauuuccgag.....                                                                                |     | 4     | 0  | S03    |
| .....aaauuuccgaggaauuuccg.....                                                                                  |     | 1     | 0  | S03    |
| .....aaauuuccgaggaauuuccgagU.....                                                                               |     | 1     | 1  | S03    |
| .....aaauuuccgaggaauuuccgga.....                                                                                |     | 2     | 0  | S03    |
| .....aaauuuccgaggaauuuccgag.....                                                                                |     | 2     | 0  | S03    |
| .....aaauuuccgaggaauuuccgagU.....                                                                               |     | 1     | 1  | S03    |
| .....aaauuuccgaggaauuuccgag.....                                                                                |     | 1     | 1  | S03    |
| .....aaauuuccgaggaauuuccgag.....                                                                                |     | 1     | 0  | S03    |
| .....aaauuuccgaggaauuuccgag.....                                                                                |     | 1     | 1  | S03    |
| .....aaauuuccgaggaauuuccgag.....                                                                                |     | 1     | 1  | S03    |
| .....aaauuuccgaggaauuuccgag.....                                                                                |     | 2     | 0  | S03    |
| .....aaauuuccgaggaauuuccgag.....                                                                                |     | 2     | 1  | S03    |
| .....aaauuuccgaggaauuuccgag.....                                                                                |     | 1     | 1  | S03    |
| .....aaauuuccgaggaauuuccgag.....                                                                                |     | 2     | 0  | S03    |
| .....aaauuuccgaggaauuuccgag.....                                                                                |     | 3     | 0  | S03    |
| .....aaauuuccgaggaauuuccgag.....                                                                                |     | 5     | 0  | S03    |



Star

Mature

| Sequence                                                                                                     | Count | Count | Category |
|--------------------------------------------------------------------------------------------------------------|-------|-------|----------|
| aagccucggaauauuccgaggaaauuccggaacacuuggauuucucggaauuuuccucggaauuuucugaggcuuuuccgaggaaacaaaaaccuaaaagaaagccuu |       |       |          |
| .uuccucggaauuuuccucg                                                                                         | 4     | 0     | S04      |
| .uuccucggaauuuuccgga                                                                                         | 1     | 0     | S04      |
| .uuccucggaauuuuccucggaaua                                                                                    | 1     | 0     | S04      |
| .uuccucggaauuuuccucggaauuu                                                                                   | 1     | 0     | S04      |
| .uGcucggaauuuuccucggaauuu                                                                                    | 1     | 1     | S04      |
| .uAcucggaauuuuccucggaauuu                                                                                    | 1     | 1     | S04      |
| .uccucggaauuuGcucggaauuu                                                                                     | 2     | 1     | S04      |
| .uAcucggaauuuuccucggaauuu                                                                                    | 2     | 1     | S04      |
| .ccGcggaauuuuccucgga                                                                                         | 1     | 1     | S04      |
| .ccucggaauuuuccucgga                                                                                         | 13    | 0     | S04      |
| .ccucggaauuuuccucgga                                                                                         | 6     | 0     | S04      |
| .ccucggaauuuuccucggaC                                                                                        | 1     | 1     | S04      |
| .ccucggaauuuuccucggaau                                                                                       | 3     | 0     | S04      |
| .ccucggaauuuuccucggaaua                                                                                      | 4     | 0     | S04      |
| .ccucggaauuuuccucggaauG                                                                                      | 1     | 1     | S04      |
| .ccucggaauuuuccucggaauu                                                                                      | 8     | 0     | S04      |
| .ccucggaauuuuccucggaauuu                                                                                     | 5     | 0     | S04      |
| .ccucggaauuuuccucggaauuC                                                                                     | 1     | 1     | S04      |
| .ccucggaauuuuccucggaauuCC                                                                                    | 1     | 1     | S04      |
| .ccucggaauuuuccucggaauuuc                                                                                    | 14    | 0     | S04      |
| .cucggaauuuuccucgga                                                                                          | 8     | 0     | S04      |
| .cucggaauuuuccucggaau                                                                                        | 9     | 0     | S04      |
| .cucggaauuuuccucggaauG                                                                                       | 1     | 1     | S04      |
| .cucggaauuuuccucggaaua                                                                                       | 22    | 0     | S04      |
| .cucggaauuuuccucggaauu                                                                                       | 16    | 0     | S04      |
| .cucggaauuuuccucggaauuC                                                                                      | 4     | 1     | S04      |
| .cucggaauuuuccucggaauuu                                                                                      | 40    | 0     | S04      |
| .Nucggaauuuuccucggaauuu                                                                                      | 1     | 1     | S04      |
| .cucggaauuuuccucggaauuuc                                                                                     | 3     | 0     | S04      |
| .cucggaauuuuccucggaauuCa                                                                                     | 1     | 1     | S04      |
| .ucggaauuuuccucggaau                                                                                         | 11    | 0     | S04      |
| .ucggaauuuuccucggaaua                                                                                        | 7     | 0     | S04      |
| .ucggaauuuuccucggaauuu                                                                                       | 4     | 0     | S04      |
| .ucggaauuuuccucggaauuu                                                                                       | 32    | 0     | S04      |
| .ucggaauCuuccucggaauuu                                                                                       | 1     | 1     | S04      |
| .ucggaauuuuccucggaauuC                                                                                       | 1     | 1     | S04      |
| .ucggaauCuuccucggaauuu                                                                                       | 1     | 1     | S04      |
| .Ncggaauuuuccucggaauuu                                                                                       | 1     | 1     | S04      |
| .ucggaauuuuccucggaauuuc                                                                                      | 3     | 0     | S04      |
| .ucggaauuuuccucggaauuuGu                                                                                     | 1     | 1     | S04      |
| .cggaauuuuccucggaaua                                                                                         | 2     | 0     | S04      |
| .cggaauuuuccucggaauu                                                                                         | 2     | 0     | S04      |
| .cggaauuuuccucggaauuu                                                                                        | 6     | 0     | S04      |
| .cggaauuuuccucggaauuuc                                                                                       | 1     | 0     | S04      |
| .auuuuccucggaauuucu                                                                                          | 1     | 0     | S04      |
| .auuuuccucggaauuucuga                                                                                        | 3     | 0     | S04      |
| .auuuuccucggaauuucuga                                                                                        | 1     | 1     | S04      |
| .aaCuuccucggaauuucuga                                                                                        | 1     | 1     | S04      |
| .auuuuccucggaauuucugaU                                                                                       | 1     | 1     | S04      |
| .auuuuccucggaauuucugaCgc                                                                                     | 1     | 1     | S04      |
| .auuuuccucggaauuucug                                                                                         | 1     | 0     | S04      |
| .auuuuccucggaauuucugG                                                                                        | 1     | 1     | S04      |



Mature

Star

| Sequence                                | Mature Count | Star Count | Category |
|-----------------------------------------|--------------|------------|----------|
| ggauuaacaagauaaauccaagcaucaucca         | 5            | 0          | S04      |
| ccuuuuuaguccuugaacaugaaggcuuguaaaug     | 1            | 1          | S04      |
| gauugaugcuugggauuuuuuuuguacucuccucuaaaa | 1            | 1          | S04      |
| .....aUaaauccaagcaucauc.                | 16           | 1          | S04      |
| .....aCaaauccaagcaucaucc.               | 3            | 1          | S04      |
| .....aUaaauccaagcaucUucc.               | 39           | 0          | S04      |
| .....aUaaauccaagcaucaucU.               | 1            | 1          | S04      |
| .....aUaaauccaagcaucaucA.               | 8            | 1          | S04      |
| .....aUaaauccaagcaucaucc.               | 1            | 1          | S04      |
| .....Nuaaauccaagcaucaucca.              | 1            | 1          | S04      |
| .....aUaaauccaagcaucaucGa.              | 1            | 1          | S04      |
| .....aUaaaucccCagcaucaucca.             | 1            | 1          | S04      |
| .....aUaaauccaagcaucaucca.              | 228          | 0          | S04      |
| .....aUaaauccaagcaucauccG.              | 18           | 1          | S04      |
| .....aUaaauccaagcUucaucca.              | 1            | 1          | S04      |
| .....aUaaauccaagcaucauccU.              | 6            | 1          | S04      |
| .....aUaaGuuccaagcaucaucca.             | 1            | 1          | S04      |
| .....aGaaauccaagcaucaucca.              | 1            | 1          | S04      |
| .....aUaaauccUaagcaucaucca.             | 1            | 1          | S04      |
| .....aUaaauccaagcaucaCcca.              | 2            | 1          | S04      |
| .....aUaaaucccAGcaucaucca.              | 1            | 1          | S04      |
| .....aUaaauccaagcaucauccaU.             | 1            | 1          | S04      |
| .....aUaaauccaagcaucauccacc.            | 1            | 0          | S04      |
| .....aUaaauccaagcaucauccacA.            | 1            | 1          | S04      |
| .....uaaauccaagcaucaucca.               | 3            | 0          | S04      |
| .....uaaauccaagcaucauccG.               | 1            | 1          | S04      |
| .....aaucccaagcaucauccaccu.             | 1            | 0          | S04      |
| .....gauugaugcuugggauuuuuuuC.           | 1            | 1          | S04      |
| .....gauugaugcuugggauuuuuuuu.           | 11           | 0          | S04      |
| .....gauugaugcuugggauuuuuuuug.          | 1            | 0          | S04      |
| .....auugaugcuugggauuuuuuuu.            | 1            | 0          | S04      |



Provisional ID : chrC05\_1911666  
 Score total : 1.8  
 Score for star read(s) : 3.9  
 Score for read counts : -3.3  
 Score for mfe : 1.4  
 Score for randfold : 0  
 Score for cons. seed :  
 Total read count : 5  
 Mature read count : 4  
 Loop read count : 0  
 Star read count : 1

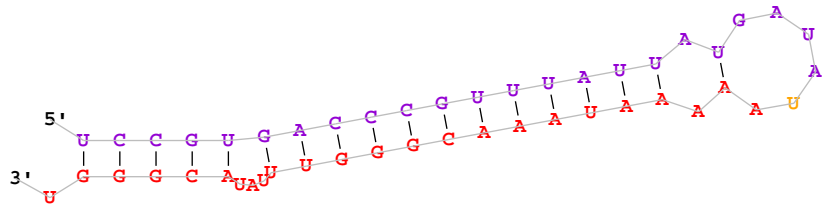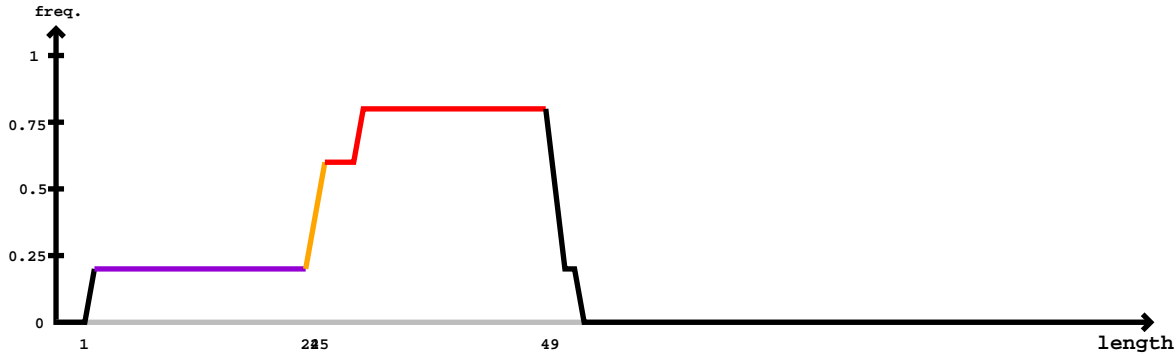

**Star Mature**

| 5' -  | Star   | Mature | -3'       | obs | exp   | reads | mm      | sample |                                                                 |   |   |     |
|-------|--------|--------|-----------|-----|-------|-------|---------|--------|-----------------------------------------------------------------|---|---|-----|
| gau   | uccgug | accg   | uuuuuugau | u   | aaaaa | aaac  | ggguuuu | aac    | ggguccgccguuuagguccgucucguuaacgggauauacccgcuaaaaaagcccguuuagagu | 1 | 0 | S03 |
| gau   | ccgug  | accg   | uuuuuugau | u   | aaaaa | aaac  | ggguuuu | aac    | ggguccgccguuuagguccgucucguuaacgggauauacccgcuaaaaaagcccguuuagagu | 1 | 1 | S04 |
| ..    | uccgug | accg   | uuuuuugau | G   | ..... | aaac  | ggguuuu | aac    | gggu                                                            | 2 | 0 | S04 |
| ..... | ..     | uccgug | uuuuuugau | G   | ..... | aaac  | ggguuuu | aac    | gggu                                                            | 1 | 1 | S04 |



Mature

Star

|                                                                                                                    |   |   |     |
|--------------------------------------------------------------------------------------------------------------------|---|---|-----|
| gguuuuugucuuuuucagaucugugucacgcacggguagaccgguuuuguaugucuaacgccuccguggagacuuacgaugcagucuaauuuugucaacgcacggguuuuuugc |   |   |     |
| .....agucuaauuuugucaacgcacgggu.....                                                                                | 1 | 0 | S03 |
| .....agucuaauuuugucaacgcacggguG.....                                                                               | 1 | 1 | S03 |
| .....gucuaauuuugucaacgcacgggu.....                                                                                 | 4 | 0 | S03 |
| .....gucuaauuuugucaacgcacggguG.....                                                                                | 1 | 1 | S03 |
| .....gucuaauuuugucaacgcacggguA.....                                                                                | 1 | 1 | S03 |
| .....ucuaauuuugucaacgcacgggu.....                                                                                  | 1 | 0 | S03 |
| .....ucuaauuuugucaacgcacgggu.....                                                                                  | 1 | 0 | S03 |
| .....ucuaauuuugucaacgcacggguu.....                                                                                 | 3 | 0 | S03 |
| .....ucuaauuuugucaacgcacggguua.....                                                                                | 1 | 0 | S03 |
| .....ucuaauuuugucaacgcacggguuagC.....                                                                              | 1 | 1 | S03 |
| .....cuaauuuugucaacgcacgggu.....                                                                                   | 1 | 0 | S03 |
| .....cuaauuuugucaacgcacggguu.....                                                                                  | 3 | 0 | S03 |
| .....cuaauuuugucaacgcacggguG.....                                                                                  | 1 | 1 | S03 |
| .....cuaauuuugucaacgcacggguuag.....                                                                                | 5 | 0 | S03 |
| .....cuaauuuugucaacgcacggguuagA.....                                                                               | 1 | 1 | S03 |
| .....uauCugucaacgcacggguu.....                                                                                     | 1 | 1 | S03 |
| .....uauuuugucaacgcacggguuag.....                                                                                  | 3 | 0 | S03 |
| .....uauuuugucaacgcacggguuaguu.....                                                                                | 1 | 0 | S03 |
| .....auuuugucaacgcacggguu.....                                                                                     | 1 | 0 | S03 |
| .....auuuugucaacgcacggguuag.....                                                                                   | 1 | 0 | S03 |
| .....auuuugucaacgcacggguuaguuC.....                                                                                | 1 | 1 | S03 |
| .....auuuugucaacgcacggguuaguuu.....                                                                                | 4 | 0 | S03 |
| .....auuuugucaacgcacggguuaguuG.....                                                                                | 1 | 1 | S03 |
| .....Uuuuuugucaacgcacggguuaguuu.....                                                                               | 1 | 1 | S03 |
| .....uuuuugucaacgcacggguuagC.....                                                                                  | 1 | 1 | S03 |
| .....uuuuugucaacgcacggguuaguu.....                                                                                 | 1 | 0 | S03 |
| .....uuuuugucaacgcacggguuaguuuu.....                                                                               | 1 | 0 | S03 |
| .....uuuuugucaacgcacggguuaguu.....                                                                                 | 1 | 0 | S03 |
| .....uuuuugucaacgcacggguuaguuuG.....                                                                               | 3 | 0 | S03 |
| .....uuuuugucaacgcacggguuaguuuuC.....                                                                              | 1 | 1 | S03 |
| .....uuuuugucaacgcacggguuaguuuuG.....                                                                              | 1 | 1 | S03 |
| .....uuuuugucaacgcacggguuaguuuuu.....                                                                              | 3 | 0 | S03 |
| .....uuuuugucaacgcacggguuaguuuuuU.....                                                                             | 1 | 1 | S03 |
| .....uuuuugucaacgcacggguuaguuuuu.....                                                                              | 2 | 0 | S03 |
| .....uuuuugucaacgcacggguuaguuuuuC.....                                                                             | 1 | 1 | S03 |
| .....uuuucagaucugugucacgcacggg.....                                                                                | 1 | 1 | S04 |
| .....agaucugugucGcgacggguagacc.....                                                                                | 2 | 1 | S04 |
| .....agaucugugucacgcacggguagacc.....                                                                               | 1 | 1 | S04 |
| .....agaucugugucacgcacggguagacc.....                                                                               | 1 | 1 | S04 |
| .....agaucugugucacgcacggguagacc.....                                                                               | 1 | 1 | S04 |
| .....gaucugugucacgcacggguagacc.....                                                                                | 1 | 0 | S04 |
| .....gaucugugucGcgacggguagacc.....                                                                                 | 2 | 1 | S04 |
| .....ccuccgugUagacuuacgaugcag.....                                                                                 | 1 | 1 | S04 |
| .....uccguggagacuuacgaugcag.....                                                                                   | 1 | 0 | S04 |
| .....ccguggagacuuacgaugcag.....                                                                                    | 1 | 0 | S04 |
| .....cguggagacuuacgaugcag.....                                                                                     | 1 | 0 | S04 |
| .....gucuaauuuugucaacgcacgggu.....                                                                                 | 1 | 0 | S04 |
| .....ucuaauuuugucaacgcacggguuG.....                                                                                | 1 | 1 | S04 |
| .....cuaauuuugucaacgcacggguuag.....                                                                                | 1 | 0 | S04 |







Star

Mature

| Sequence                             | Star | Mature | S03 |
|--------------------------------------|------|--------|-----|
| .....agauuugUucgaucgaugagagu.....    | 1    | 1      | S03 |
| .....agauCgugaucgaucgaugagagu.....   | 4    | 1      | S03 |
| .....Ngauugugaucgaucgaugagagu.....   | 2    | 1      | S03 |
| .....agauuugaucgaucgaugagagu.....    | 1136 | 0      | S03 |
| .....agauAbugaucgaucgaugagagu.....   | 1    | 1      | S03 |
| .....agauuugaucgaucgaugGgagu.....    | 5    | 1      | S03 |
| .....aUauugugaucgaucgaugagagu.....   | 7    | 1      | S03 |
| .....agauuugaucgaucgauUagagu.....    | 1    | 1      | S03 |
| .....agauuugaAcgaucgaugagagu.....    | 1    | 1      | S03 |
| .....agauuugaucgaucgauAagagu.....    | 4    | 1      | S03 |
| .....aAauugugaucgaucgaugagagu.....   | 3    | 1      | S03 |
| .....agUuugugaucgaucgaugagagu.....   | 1    | 1      | S03 |
| .....agCuugugaucgaucgaugagagu.....   | 1    | 1      | S03 |
| .....agauuugaucgGucgaugagagu.....    | 5    | 1      | S03 |
| .....agauuugaucgaucgaugaAu.....      | 2    | 1      | S03 |
| .....agauugAgaucgaucgaugagagu.....   | 1    | 1      | S03 |
| .....agauuugaucgaucgaugUgagu.....    | 3    | 1      | S03 |
| .....agauuugGucgaucgaugagagu.....    | 3    | 1      | S03 |
| .....agauuugaucgaucgaugagG.....      | 47   | 1      | S03 |
| .....Ggauugugaucgaucgaugagagu.....   | 9    | 1      | S03 |
| .....agauuugaucgaucgaugaAagu.....    | 3    | 1      | S03 |
| .....agaCugaucgaucgaugagagu.....     | 1    | 1      | S03 |
| .....agauuugaucgaucgaugagUgu.....    | 24   | 1      | S03 |
| .....agauuugaucgaCgaugagagu.....     | 5    | 1      | S03 |
| .....agauuugaucgaucgUugagagu.....    | 1    | 1      | S03 |
| .....agauuugaucgaucgaugagaCu.....    | 1    | 1      | S03 |
| .....agauuugaCcgauugagagagu.....     | 2    | 1      | S03 |
| .....agauuugaucgaucgaugagCgu.....    | 1    | 1      | S03 |
| .....agauuugaucgaucCaugagagagu.....  | 1    | 1      | S03 |
| .....agauuugaucgaGcgaugagagagu.....  | 1    | 1      | S03 |
| .....agauuugaucgaucAaugagagagu.....  | 5    | 1      | S03 |
| .....agauuugaucgaucgaugagGgu.....    | 2    | 1      | S03 |
| .....agauuugaucgaucgaCgagagagu.....  | 2    | 1      | S03 |
| .....agauugCgaucgaucgaugagagu.....   | 6    | 1      | S03 |
| .....agauuugauUgaucgaugagagagu.....  | 2    | 1      | S03 |
| .....agauuugaucgaucgaugagagC.....    | 109  | 1      | S03 |
| .....agauuugaucgaucgGugagagagu.....  | 4    | 1      | S03 |
| .....agauuugaucgauUgagagagagu.....   | 5    | 1      | S03 |
| .....agauuugaucUaucgaugagagagu.....  | 1    | 1      | S03 |
| .....agGuugugaucgaucgaugagagagu..... | 9    | 1      | S03 |
| .....agauuugaucgaucgaugagagua.....   | 1    | 0      | S03 |
| .....agauuugaucgaucgaugagagagG.....  | 1    | 1      | S03 |
| .....gauugaucgaucgaug.....           | 4    | 0      | S03 |
| .....gauugaucgaucgaugU.....          | 1    | 1      | S03 |
| .....gauugaucgaucgaugag.....         | 9    | 0      | S03 |
| .....gauugaucgaucgaugaA.....         | 1    | 1      | S03 |
| .....gauugaucgaucgaugGga.....        | 1    | 1      | S03 |
| .....gauugaucgaucgaugaUa.....        | 1    | 1      | S03 |
| .....gauugaucgaucgaugagU.....        | 3    | 1      | S03 |
| .....gauugaucgaucgaugagaga.....      | 12   | 0      | S03 |
| .....gauugaucgaucgaugagUg.....       | 1    | 1      | S03 |
| .....gauugaucgaucgaugagagaA.....     | 1    | 1      | S03 |
| .....gauugaucgaucgaugagag.....       | 6    | 0      | S03 |
| .....gauugGucgaucgaugagag.....       | 1    | 1      | S03 |
| .....gauugaucgaucgaugagagaAu.....    | 2    | 1      | S03 |
| .....gauugaucgaucgaCgagagagu.....    | 1    | 1      | S03 |
| .....gauugaucgaucgUugagagagu.....    | 1    | 1      | S03 |
| .....gauugGucgaucgaugagagagu.....    | 1    | 1      | S03 |
| .....gauugaucgaCcgauugagagagu.....   | 1    | 1      | S03 |
| .....gauugaucgaucgaugagagG.....      | 4    | 1      | S03 |
| .....gauugaucgGucgaugagagagu.....    | 1    | 1      | S03 |
| .....gauugGgaucgaucgaugagagu.....    | 1    | 1      | S03 |
| .....gauugaucgaucgaugagagagu.....    | 65   | 0      | S03 |
| .....gauugaucgaucgaugagagC.....      | 4    | 1      | S03 |
| .....gauugaucgaucgaugagagagG.....    | 1    | 1      | S03 |
| .....gaCugaucgaucgaugagagagua.....   | 1    | 1      | S03 |
| .....gauugaucgaucgaugagagaAua.....   | 1    | 1      | S03 |
| .....gauCgugaucgaucgaugagagagua..... | 1    | 1      | S03 |
| .....gauugaucgUucgaugagagagua.....   | 1    | 1      | S03 |
| .....gGuugaucgaucgaugagagagua.....   | 1    | 1      | S03 |















Star

Mature

| Sequence                                | Star | Mature | Category |
|-----------------------------------------|------|--------|----------|
| ..... agauugugaucgaucgauUagagu.....     | 2    | 1      | S04      |
| ..... agauugugaucgaucGugagagu.....      | 1    | 1      | S04      |
| ..... agauugugaucgaucgaGgagagu.....     | 1    | 1      | S04      |
| ..... agauugugaucgaucgauAagagu.....     | 2    | 1      | S04      |
| ..... agauugugaucgaucgaugagagC.....     | 204  | 1      | S04      |
| ..... agauugugaucgaucgaugagCgu.....     | 1    | 1      | S04      |
| ..... agauugugaAcgaucgaugagagu.....     | 1    | 1      | S04      |
| ..... agauugGgaucgaucgaugagagu.....     | 2    | 1      | S04      |
| ..... agauugugUucgaucgaugagagu.....     | 2    | 1      | S04      |
| ..... agauugugaucUaucgaugagagu.....     | 3    | 1      | S04      |
| ..... agauugugaucgaucgaugagaAu.....     | 12   | 1      | S04      |
| ..... agauugugaucGucgaugagagu.....      | 9    | 1      | S04      |
| ..... agauuguAaucgaucgaugagagu.....     | 5    | 1      | S04      |
| ..... agauCgugaucgaucgaugagagu.....     | 9    | 1      | S04      |
| ..... agauugugaucgaucgaugagUgu.....     | 46   | 1      | S04      |
| ..... agauugugaucgaucgaugagagu.....     | 2390 | 0      | S04      |
| ..... agauugugaucgaucgaugagGgu.....     | 8    | 1      | S04      |
| ..... agauugugaCcgauucgaugagagu.....    | 4    | 1      | S04      |
| ..... aCauugugaucgaucgaugagagu.....     | 2    | 1      | S04      |
| ..... aUauugugaucgaucgaugagagu.....     | 3    | 1      | S04      |
| ..... agauugugaucgaucgaugUgagu.....     | 4    | 1      | S04      |
| ..... agauAgugaucgaucgaugagagu.....     | 1    | 1      | S04      |
| ..... agauugugaucgaucgaugagagua.....    | 1    | 0      | S04      |
| ..... agauugugaucgaucgaugagaguG.....    | 3    | 1      | S04      |
| ..... agauugugaucgaucgaugagaguaC.....   | 1    | 1      | S04      |
| ..... agauugugaucgaucgaugagaguGu.....   | 1    | 1      | S04      |
| ..... gauugugaucgaucgauA.....           | 1    | 1      | S04      |
| ..... gauugugaucgaucgaug.....           | 2    | 0      | S04      |
| ..... gauugugaucgaucgauga.....          | 1    | 0      | S04      |
| ..... gaGugugaucgaucgaugag.....         | 1    | 1      | S04      |
| ..... gauugugaucgaucgaugaA.....         | 2    | 1      | S04      |
| ..... gauugugaucgaucgaugag.....         | 7    | 0      | S04      |
| ..... gauugugaucgaucgaugaUa.....        | 2    | 1      | S04      |
| ..... gauugugaucgaucgaugUga.....        | 1    | 1      | S04      |
| ..... gauugugaucgaAcgaugaga.....        | 1    | 1      | S04      |
| ..... gauugugaucgaucgaugaga.....        | 19   | 0      | S04      |
| ..... gauugugaucgaucgaugaCa.....        | 2    | 1      | S04      |
| ..... gauugugaucgaucgaugagG.....        | 1    | 1      | S04      |
| ..... gauugugaucgaucgaugagU.....        | 3    | 1      | S04      |
| ..... gauugugaucgaucgaugagaA.....       | 2    | 1      | S04      |
| ..... gauugugaucgaucgaugagag.....       | 14   | 0      | S04      |
| ..... gauugugaCcgauucgaugagagu.....     | 1    | 1      | S04      |
| ..... gGuugugaucgaucgaugagagu.....      | 1    | 1      | S04      |
| ..... gauugugaucgaucgaugagaAu.....      | 1    | 1      | S04      |
| ..... Auugugaucgaucgaugagagu.....       | 1    | 1      | S04      |
| ..... gauugugauUgauucgaugagagu.....     | 2    | 1      | S04      |
| ..... Uauugugaucgaucgaugagagu.....      | 3    | 1      | S04      |
| ..... gauugugaucgaucgaugagagC.....      | 9    | 1      | S04      |
| ..... gauugugaucgaucgaugagGgu.....      | 2    | 1      | S04      |
| ..... gauugugaucgaGcgauugagagu.....     | 1    | 1      | S04      |
| ..... gauugugaucgaucgaugagagG.....      | 7    | 1      | S04      |
| ..... gauugugaucgaucgaugagagu.....      | 100  | 0      | S04      |
| ..... gauuguUaucgaucgaugagagu.....      | 1    | 1      | S04      |
| ..... gauugugaucgaucgaugagagua.....     | 19   | 0      | S04      |
| ..... gauugugaucgaucgaugagaAua.....     | 2    | 1      | S04      |
| ..... gauugugaucgaucgaugagaguauC.....   | 1    | 0      | S04      |
| ..... gauugugaucgaucgaugagaguauCCa..... | 1    | 0      | S04      |
| ..... auAgugaucgaucgauga.....           | 2    | 1      | S04      |
| ..... auugugaucgaucgaugag.....          | 2    | 0      | S04      |
| ..... auugugaucgaucgaugaA.....          | 1    | 1      | S04      |
| ..... auugugaucgaucgauAag.....          | 1    | 1      | S04      |
| ..... auugugaucgaucgaugagC.....         | 1    | 1      | S04      |
| ..... auugCgaucgaucgaugaga.....         | 1    | 1      | S04      |
| ..... Nuugugaucgaucgaugaga.....         | 1    | 1      | S04      |
| ..... auugugaucgaucgaugagU.....         | 1    | 1      | S04      |
| ..... auugugaucgaucgaugaga.....         | 10   | 0      | S04      |
| ..... auugugaucgaucgaugaUa.....         | 1    | 1      | S04      |
| ..... auugugaucgaucgaugagaA.....        | 2    | 1      | S04      |
| ..... auugugaucgaucgaugagag.....        | 13   | 0      | S04      |











Star

Mature

|                                                                                                                                                                                                                                |   |   |     |
|--------------------------------------------------------------------------------------------------------------------------------------------------------------------------------------------------------------------------------|---|---|-----|
| cuuaa <u>uuuaa</u> aguc <u>uucua</u> cu <u>aaguc</u> cu <u>caac</u> uggaagacu <u>uucua</u> gaca <u>acuua</u> au <u>uaga</u> aguc <u>gucua</u> cu <u>aaguc</u> guc <u>uaac</u> uggaagacu <u>uuccagacgac</u> cu <u>uaauu</u> uaa |   |   |     |
| .....aagacu <u>uuccagacgac</u> cu <u>uaau</u> A...                                                                                                                                                                             | 2 | 1 | S04 |
| .....aagacu <u>uuccagacgac</u> cu <u>uaau</u> U...                                                                                                                                                                             | 1 | 1 | S04 |
| .....agacu <u>uuccagacgac</u> cu <u>uaau</u> .....                                                                                                                                                                             | 1 | 0 | S04 |
| .....agacu <u>uuccagacgac</u> cu <u>uaau</u> u.....                                                                                                                                                                            | 8 | 0 | S04 |
| .....agacu <u>uuccagacgac</u> cu <u>uaau</u> aA.....                                                                                                                                                                           | 2 | 1 | S04 |
| .....acu <u>uuccagacgac</u> cu <u>uaau</u> ua.....                                                                                                                                                                             | 1 | 0 | S04 |
| .....cu <u>uuccagacgac</u> cu <u>uaau</u> u.....                                                                                                                                                                               | 1 | 0 | S04 |
| .....cu <u>uuccagacgac</u> cu <u>uaau</u> ua.....                                                                                                                                                                              | 2 | 0 | S04 |
| .....u <u>uuccagacgac</u> cu <u>uaau</u> a.....                                                                                                                                                                                | 1 | 0 | S04 |

Provisional ID : chrC05\_1923465  
 Score total : 0.5  
 Score for star read(s) : -1.3  
 Score for read counts : 0  
 Score for mfe : 1.8  
 Score for randfold : 0  
 Score for cons. seed :  
 Total read count : 142  
 Mature read count : 37  
 Loop read count : 102  
 Star read count : 3

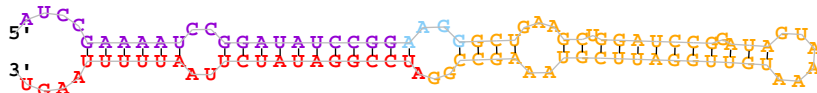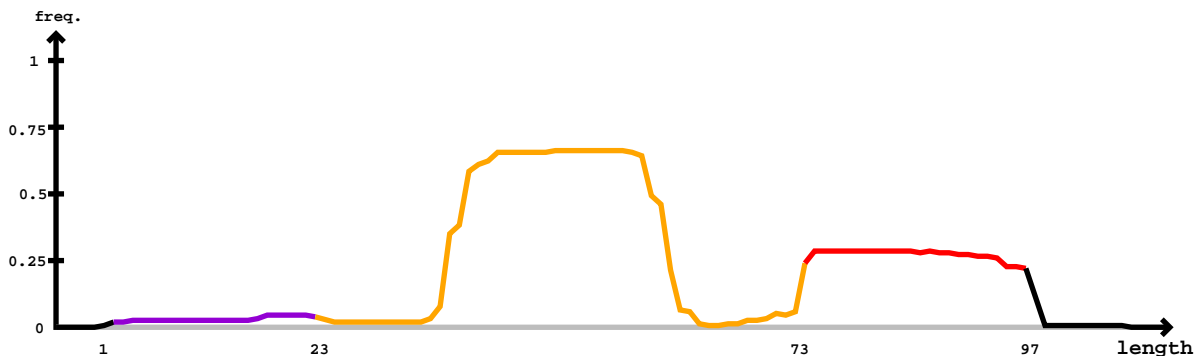

**Star**

**Mature**

| 5' -   | Star                                                   | Mature                                            | -3'                   | obs   | mm | sample |
|--------|--------------------------------------------------------|---------------------------------------------------|-----------------------|-------|----|--------|
|        |                                                        |                                                   |                       | reads |    |        |
| ucugau | uccgaaaauccggauuccgg                                   | aagggcugaagcuggauuccggauaguaaaauguggaucguaaagccgg | aucggauucuaauuuuaaguc | 1     | 0  | S03    |
| ucugau | ccgaaaauccggauuccggaag                                 | gcugaagcuggauuccggauaguaaaauguggaucguaaagccgg     | aucggauucuaauuuuaaguc | 1     | 0  | S03    |
| ...    | (((.....(((.....(((.....(((.....(((.....)))))))))))))) | .....))))))                                       | .....))))             | 1     | 0  | S03    |
| ...    | gauccgaaaauccggauuccgg                                 | .....                                             | .....                 | 1     | 0  | S03    |
| ...    | ccgaaaauccggauuccg                                     | .....                                             | .....                 | 3     | 0  | S03    |
| .....  | ggauccggauaguaaaauguu                                  | .....                                             | .....                 | 2     | 0  | S03    |
| .....  | ggauccggauaguaaaauguug                                 | .....                                             | .....                 | 7     | 0  | S03    |
| .....  | ggauccggauaguaaaauguugCa                               | .....                                             | .....                 | 1     | 1  | S03    |
| .....  | ggauccggauaguaaaauguugga                               | .....                                             | .....                 | 5     | 0  | S03    |
| .....  | auccggauaguaaaauguu                                    | .....                                             | .....                 | 1     | 0  | S03    |
| .....  | auccggauaguaaaauguu                                    | .....                                             | .....                 | 4     | 0  | S03    |
| .....  | auccggauaguaaaauguug                                   | .....                                             | .....                 | 6     | 0  | S03    |
| .....  | auccggauaguaaaauguugga                                 | .....                                             | .....                 | 1     | 0  | S03    |
| .....  | auccggauaguaaaauguuUgauu                               | .....                                             | .....                 | 1     | 1  | S03    |
| .....  | auccggauaguaaaauguuggauu                               | .....                                             | .....                 | 1     | 0  | S03    |
| .....  | auccggauaguaaaauguuggauA                               | .....                                             | .....                 | 1     | 1  | S03    |
| .....  | ccggauaguaaaauguuggauu                                 | .....                                             | .....                 | 1     | 0  | S03    |
| .....  | cggauaguaaaauguugg                                     | .....                                             | .....                 | 1     | 0  | S03    |
| .....  | cggauaguaaaauguuggauu                                  | .....                                             | .....                 | 1     | 0  | S03    |
| .....  | aaagccggauccggauucuaau                                 | .....                                             | .....                 | 1     | 0  | S03    |
| .....  | agccggauccggauucua                                     | .....                                             | .....                 | 1     | 0  | S03    |
| .....  | ccggauccggauucua                                       | .....                                             | .....                 | 1     | 0  | S03    |
| .....  | cggauccggauucuaauuuua                                  | .....                                             | .....                 | 1     | 0  | S03    |
| .....  | auccggauucuaauuuuaagA                                  | .....                                             | .....                 | 1     | 1  | S03    |
| .....  | auccggauucuaauuuuaagu                                  | .....                                             | .....                 | 5     | 0  | S03    |
| .....  | auccggauucuaauuuuaagC                                  | .....                                             | .....                 | 1     | 1  | S03    |
| .....  | uccggauucuaCuuuuaaguc                                  | .....                                             | .....                 | 1     | 1  | S03    |
| .....  | uccggauucuaauuuuaaguU                                  | .....                                             | .....                 | 1     | 1  | S03    |
| .....  | auccgaaaauccggauuccgg                                  | .....                                             | .....                 | 2     | 0  | S04    |
| .....  | uauccggaGgggcugaag                                     | .....                                             | .....                 | 1     | 1  | S04    |
| .....  | auccggaagggcugaagcuggauc                               | .....                                             | .....                 | 2     | 0  | S04    |
| .....  | cuggauccggauaguaaaauguG                                | .....                                             | .....                 | 1     | 1  | S04    |
| .....  | cuggauUcggauaguaaaauguu                                | .....                                             | .....                 | 1     | 1  | S04    |
| .....  | cuggauccggauaguaaaauguug                               | .....                                             | .....                 | 1     | 0  | S04    |

Star

Mature

| Sequence                                                                                                       | Star | Mature | Label |
|----------------------------------------------------------------------------------------------------------------|------|--------|-------|
| ucugaucgaaaaucgggauucgggaaggccugaaagcuggauccggauaguaaaaauguuggauucguaaagccggauccggauaucuuuuuuuaagucgggauuccgaa |      |        |       |
| .....uAgaucgggauaguaaaaauguugg.....                                                                            | 2    | 1      | S04   |
| .....Nggaucgggauaguaaaaauguugg.....                                                                            | 2    | 1      | S04   |
| .....uggaucgggauaguaaaaauguugg.....                                                                            | 3    | 0      | S04   |
| .....ggaucgggauaguaaaaauguG.....                                                                               | 1    | 1      | S04   |
| .....ggaucgggauaguaaaaauguu.....                                                                               | 2    | 0      | S04   |
| .....ggaucgggauaguaaaaauguugg.....                                                                             | 1    | 0      | S04   |
| .....ggaucgggauaguaaaaauguugg.....                                                                             | 7    | 0      | S04   |
| .....ggGuccgggauaguaaaaauguugga.....                                                                           | 1    | 1      | S04   |
| .....ggaucgggauaguaaaaauguugga.....                                                                            | 11   | 0      | S04   |
| .....ggaucgggauaguaaaaauguuggG.....                                                                            | 1    | 1      | S04   |
| .....gaucgggauaguaaaaaug.....                                                                                  | 1    | 0      | S04   |
| .....gaucgggauaguaaaaaugu.....                                                                                 | 1    | 0      | S04   |
| .....gaucgggauaguaaaaauguugg.....                                                                              | 3    | 0      | S04   |
| .....aucgggauaguaaaaauguG.....                                                                                 | 2    | 1      | S04   |
| .....aucgggauaguaaaaauguu.....                                                                                 | 6    | 0      | S04   |
| .....aucgggauaguaaaaauguugg.....                                                                               | 1    | 0      | S04   |
| .....aucgggauaguaaaaauguugg.....                                                                               | 4    | 0      | S04   |
| .....aucgggauaguaaaaauguuggC.....                                                                              | 1    | 1      | S04   |
| .....aucgggauaguaaaaauguugga.....                                                                              | 1    | 0      | S04   |
| .....aucgggauaguaaaaauguuggAuu.....                                                                            | 1    | 1      | S04   |
| .....uccgggauaguaaaaauguG.....                                                                                 | 1    | 1      | S04   |
| .....uccgggauaguaaaaauguu.....                                                                                 | 2    | 0      | S04   |
| .....uccgggauaguaaaaauguugg.....                                                                               | 1    | 0      | S04   |
| .....ccggauaguaaaaauguugga.....                                                                                | 1    | 0      | S04   |
| .....cggauaguaaaaauguugg.....                                                                                  | 1    | 0      | S04   |
| .....cggauaguaaaaauguugga.....                                                                                 | 1    | 0      | S04   |
| .....cggauaguaaaaauguuggau.....                                                                                | 1    | 0      | S04   |
| .....cggauaguaaaaauguuggauU.....                                                                               | 1    | 1      | S04   |
| .....guaaaauguuggauucgaaagcU.....                                                                              | 1    | 1      | S04   |
| .....agccggauccggauaucuuuuuuC.....                                                                             | 1    | 1      | S04   |
| .....cggauccgggauaucuuuuuuuA.....                                                                              | 1    | 1      | S04   |
| .....cggauccgggauaucuuuuuuua.....                                                                              | 1    | 0      | S04   |
| .....gaucgggauaucuuuuuuua.....                                                                                 | 1    | 0      | S04   |
| .....gaucgggauaucuuuuuuuaag.....                                                                               | 1    | 0      | S04   |
| .....aucgggauaucuuuuuuua.....                                                                                  | 2    | 0      | S04   |
| .....aucgggauaucuuuuuuuaagC.....                                                                               | 2    | 1      | S04   |
| .....aucgggauaucuuuuuuuaagu.....                                                                               | 15   | 0      | S04   |
| .....aucgggauaucuuuuuuuaagG.....                                                                               | 1    | 1      | S04   |
| .....aucggGuaucuuuuuuuaagu.....                                                                                | 1    | 1      | S04   |
| .....uccgggauaucuuuuuuuaagu.....                                                                               | 1    | 1      | S04   |
| .....uccgggauaucuuuuuuuaagu.....                                                                               | 1    | 0      | S04   |
| .....uccgggauaucuuuuuuuaaguc.....                                                                              | 3    | 0      | S04   |
| .....aaaauuuuuaaguccgggauucA.....                                                                              | 1    | 1      | S04   |

Provisional ID : chrC05\_1936254  
 Score total : 0.2  
 Score for star read(s) : -1.3  
 Score for read counts : 0  
 Score for mfe : 1.5  
 Score for randfold : 0  
 Score for cons. seed :  
 Total read count : 31  
 Mature read count : 31  
 Loop read count : 0  
 Star read count : 0

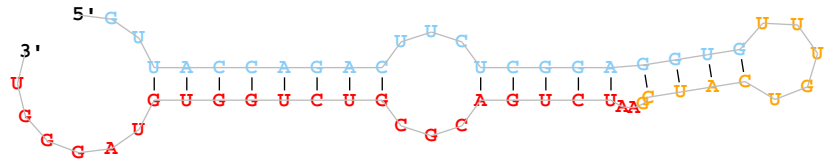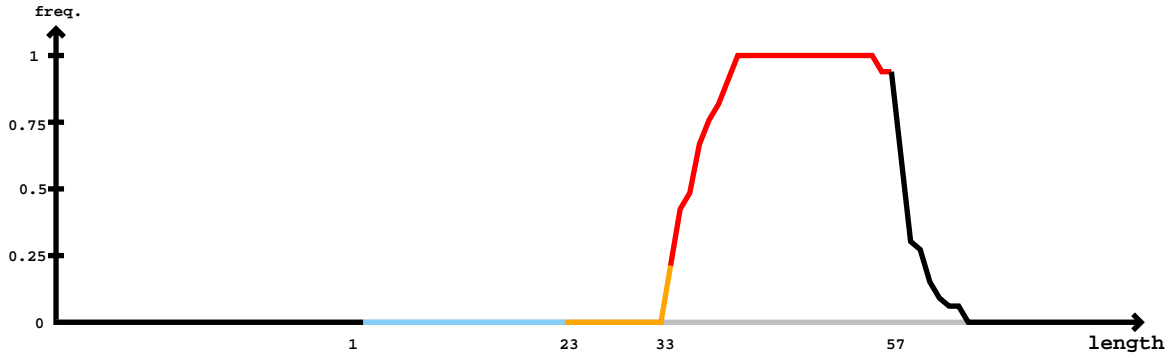

**Star** **Mature**

| 5' -                  |                       | -3'               | exp        | reads                             | mm                       | sample                    |   |   |     |
|-----------------------|-----------------------|-------------------|------------|-----------------------------------|--------------------------|---------------------------|---|---|-----|
| gaa                   | gc                    | cauguccacgguu     | ccggucccgc | guuaccagacuucucggaggguuuugucaucga | aucgacgucgucugggugaggguu | ugggggcagauuugaugcagaggca | 1 | 1 | S03 |
| gac                   | gc                    | gucucugggugaggguu | ggg        | gagcgcgucugggugaggguu             |                          |                           | 1 | 0 | S03 |
| gac                   | gc                    | gucucugggugaggguu | ggg        | acg                               | gcgucugggugaggguu        | ggg                       | 1 | 0 | S03 |
| gac                   | gc                    | gucucugggugaggguu | ggg        | cg                                | gcgucugggugaggguu        | gggA                      | 1 | 1 | S03 |
| aauc                  | agacgcgucugggugaggguu |                   |            | 1                                 | 1                        | S04                       |   |   |     |
| aauc                  | agacgcgucugggugaggguu |                   |            | 6                                 | 1                        | S04                       |   |   |     |
| auc                   | agacgcgucugggugaggguu |                   |            | 2                                 | 1                        | S04                       |   |   |     |
| auc                   | agacgcgucugggugaggguu |                   |            | 5                                 | 1                        | S04                       |   |   |     |
| uc                    | agacgcgucugggugaggguu |                   |            | 1                                 | 1                        | S04                       |   |   |     |
| uc                    | agacgcgucugggugaggguu |                   |            | 1                                 | 1                        | S04                       |   |   |     |
| c                     | agacgcgucugggugaggguu |                   |            | 1                                 | 1                        | S04                       |   |   |     |
| c                     | agacgcgucugggugaggguu |                   |            | 2                                 | 1                        | S04                       |   |   |     |
| c                     | agacgcgucugggugaggguu |                   |            | 2                                 | 1                        | S04                       |   |   |     |
| agacgcgucugggugaggguu |                       |                   |            | 1                                 | 1                        | S04                       |   |   |     |
| agacgcgucugggugaggguu |                       |                   |            | 1                                 | 1                        | S04                       |   |   |     |
| g                     | gcgucugggugaggguu     |                   |            | 1                                 | 1                        | S04                       |   |   |     |
| acg                   | gcgucugggugaggguu     |                   |            | 1                                 | 0                        | S04                       |   |   |     |
| acg                   | gcgucugggugaggguu     |                   |            | 1                                 | 1                        | S04                       |   |   |     |
| cg                    | gcgucugggugaggguu     |                   |            | 2                                 | 1                        | S04                       |   |   |     |

Provisional ID : chrC05\_random\_2875529  
 Score total : 1.1  
 Score for star read(s) : -1.3  
 Score for read counts : 0  
 Score for mfe : 2.4  
 Score for randfold : 0  
 Score for cons. seed :  
 Total read count : 12  
 Mature read count : 12  
 Loop read count : 0  
 Star read count : 0

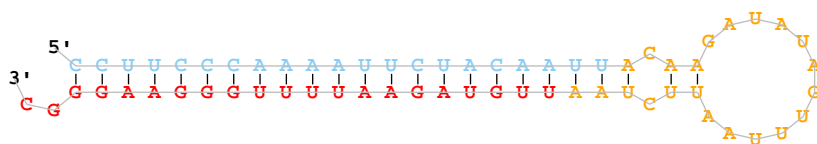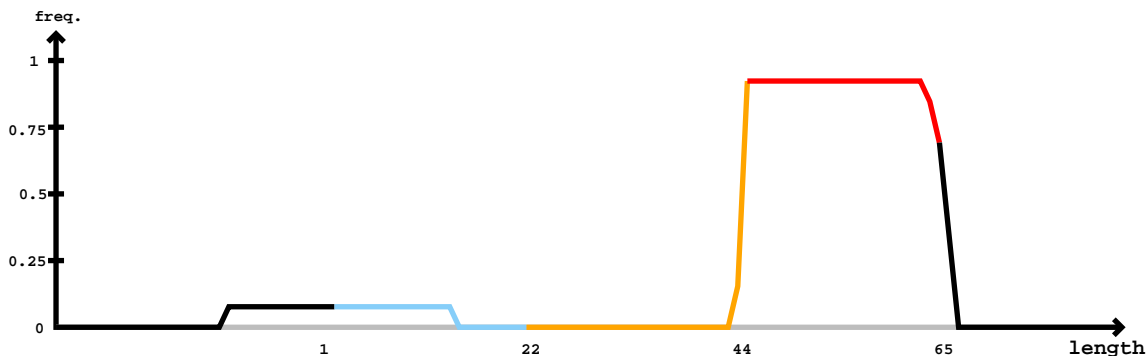

Star

Mature

| 5' | Star | Mature | -3' | exp | reads | mm | sample |
|----|------|--------|-----|-----|-------|----|--------|
| g  | c    | c      | g   | g   | 2     | 0  | S03    |
| c  | c    | c      | g   | g   | 1     | 0  | S03    |
| c  | c    | c      | g   | g   | 7     | 0  | S03    |
| g  | c    | c      | g   | g   | 1     | 1  | S04    |
| c  | c    | c      | g   | g   | 2     | 0  | S04    |





# Mature

# Star

|                                                                                                                  |   |   |     |
|------------------------------------------------------------------------------------------------------------------|---|---|-----|
| gugucgagcgacagaauaugaacagugucgaucaacagaagaugaauagugucgacgacacgggaugaacagugucgaucgacggguugaauagugucgacggacacgggau |   |   |     |
| .....cgaccgacacggggaugaacaAug.....                                                                               | 1 | 1 | S04 |
| .....cgaccgacacggggaugaacaAug.....                                                                               | 2 | 1 | S04 |
| .....acgggaugaacagugucgaucgac.....                                                                               | 1 | 0 | S04 |
| .....gaugaacagugucgaucgacgggC.....                                                                               | 1 | 1 | S04 |
| .....augaacagugucgaucgacg.....                                                                                   | 1 | 0 | S04 |
| .....augaacagugucgaucgacg.....                                                                                   | 1 | 0 | S04 |
| .....augaacagugucgaucgacggg.....                                                                                 | 2 | 0 | S04 |
| .....augaacagugucgaucgacgggAa.....                                                                               | 1 | 1 | S04 |
| .....aacagugucgaucgacggggaug.....                                                                                | 1 | 0 | S04 |

Provisional ID : chrC05\_random\_2885587  
 Score total : 9.8  
 Score for star read(s) : 3.9  
 Score for read counts : 10.3  
 Score for mfe : -4.3  
 Score for randfold : 0  
 Score for cons. seed :  
 Total read count : 32  
 Mature read count : 22  
 Loop read count : 0  
 Star read count : 10

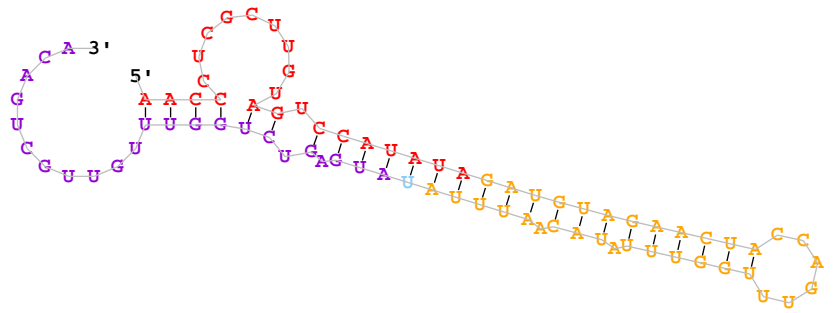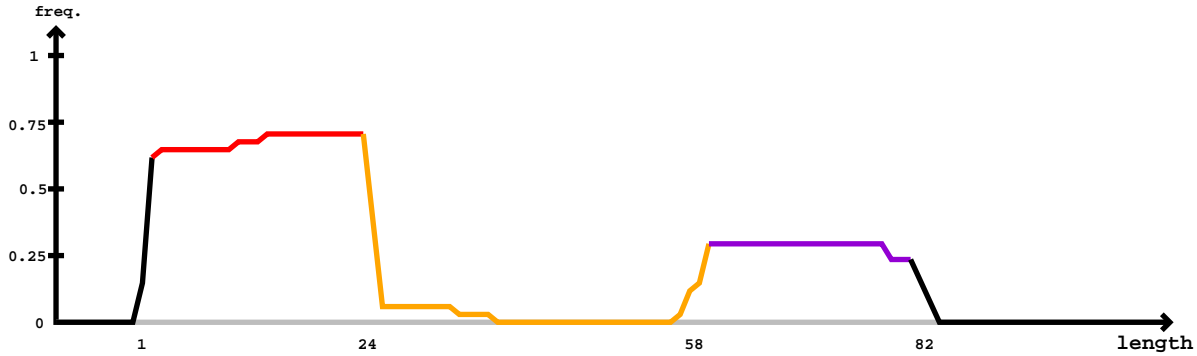

**Mature**

**Star**

|                                                                                                                                                                                                                                                                                                                                                                                                                                                                                                                                                                                                                                                                                                                                                                                                                                                                                                                                                                                                                                                                                                                                     |                                                                                                                                                                                                                                          |
|-------------------------------------------------------------------------------------------------------------------------------------------------------------------------------------------------------------------------------------------------------------------------------------------------------------------------------------------------------------------------------------------------------------------------------------------------------------------------------------------------------------------------------------------------------------------------------------------------------------------------------------------------------------------------------------------------------------------------------------------------------------------------------------------------------------------------------------------------------------------------------------------------------------------------------------------------------------------------------------------------------------------------------------------------------------------------------------------------------------------------------------|------------------------------------------------------------------------------------------------------------------------------------------------------------------------------------------------------------------------------------------|
| <p>5' - auaaaagc<b>caaccucgcuuguaguccauaua</b>gauguagaacuaaccagu<u>uugguuuauacaauuuu</u>au<b>augagucugguuuguugcugaca</b>aaaaaaaaacauuaaaaaagaucac<br/>       auaaaagc<b>caaccucgcuuguaguccauaua</b>gauguagaacuaaccagu<u>uugguuuauacaauuuu</u>au<b>augagucugguuuguugc</b>ugacaaaaaaaaacauuaaaaaagaucac<br/>       .....(((((((.....(((((((.....(((((((.....)))))))))))).)))))))))).....<br/>       .....caaccucgUuuguaguccauaua.....<br/>       .....aaccucgUuuguaguccauaua.....<br/>       .....uuguaguccauauagauguagaG.....<br/>       .....uaguccauauagauguagaacuc.....<br/>       .....auaugagucuggCuuguugcugaca.....<br/>       .....auaugagucugguuuguugcugaca.....<br/>       .....augagucugguuuguugcugaca.....</p> <p>.....caaccucgUuuguaguccauaua.....<br/>       .....aaccucgUuuguaguccauaua.....<br/>       .....accucgUuuguaguccauaua.....<br/>       .....uauaugagucugguuuguugcu.....<br/>       .....auaugagucugguuuguugcu.....<br/>       .....uagagucugguuuguugcugaUa.....<br/>       .....augagucugguuuguugcugacU.....<br/>       .....augagucugguuuguugcugaUa.....<br/>       .....augagucugguuuguugcugaca.....</p> | <p>-3' obs<br/>exp</p> <p>reads mm sample</p> <p>3 1 S03<br/>6 1 S03<br/>1 1 S03<br/>1 0 S03<br/>1 1 S03<br/>1 0 S03<br/>1 0 S03</p> <p>2 1 S04<br/>10 1 S04<br/>1 1 S04<br/>1 0 S04<br/>1 1 S04<br/>1 1 S04<br/>2 1 S04<br/>1 0 S04</p> |
|-------------------------------------------------------------------------------------------------------------------------------------------------------------------------------------------------------------------------------------------------------------------------------------------------------------------------------------------------------------------------------------------------------------------------------------------------------------------------------------------------------------------------------------------------------------------------------------------------------------------------------------------------------------------------------------------------------------------------------------------------------------------------------------------------------------------------------------------------------------------------------------------------------------------------------------------------------------------------------------------------------------------------------------------------------------------------------------------------------------------------------------|------------------------------------------------------------------------------------------------------------------------------------------------------------------------------------------------------------------------------------------|

Provisional ID : chrC05\_random\_2886203  
 Score total : 37.2  
 Score for star read(s) : 3.9  
 Score for read counts : 36.3  
 Score for mfe : -2.9  
 Score for randfold : 0  
 Score for cons. seed :  
 Total read count : 83  
 Mature read count : 82  
 Loop read count : 0  
 Star read count : 1

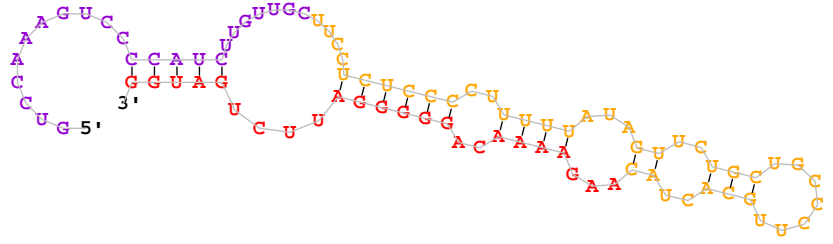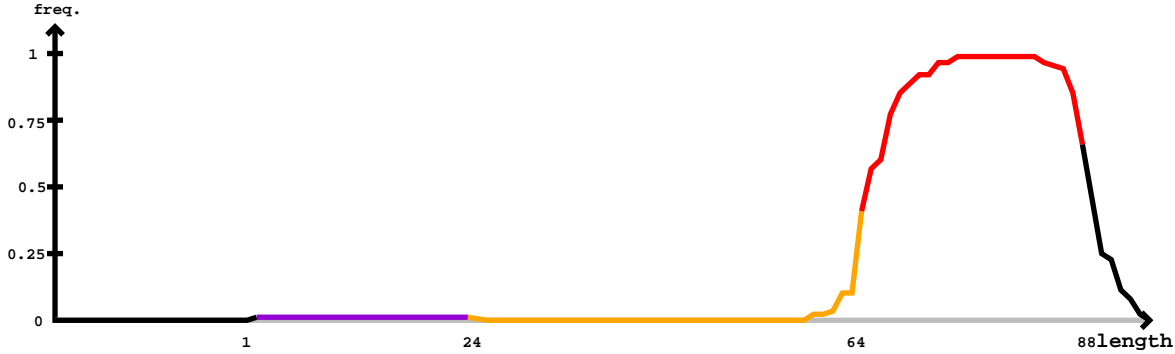

**Star**

**Mature**

| 5' -                                                                                                                                                | reads | mm | sample |
|-----------------------------------------------------------------------------------------------------------------------------------------------------|-------|----|--------|
| ccgcuuaguauuguccaaug <u>guc</u> caaguccccauc <u>u</u> guug <u>u</u> uccucuccccuuuuuuuauaguucugcugcccuugcacuacaagaaaa <u>cagggg</u> gauucugauggcccga | obs   |    |        |
| ccgcuuaguauuguccaaug <u>guc</u> caaguccccauc <u>u</u> guug <u>u</u> uccucuccccuuuuuuuauaguucugcugcccuugcacuacaagaaaa <u>cagggg</u> gauucugauggcccga | exp   |    |        |
| .....(((((((.....(((((((.....)))))).....)))))).....)))))).....)))))).....)))))).....                                                                |       |    |        |
| .....acaagaaaa <u>cagggg</u> gauucugauU.....                                                                                                        | 1     | 1  | S03    |
| .....aagaaaa <u>cagggg</u> gauucug.....                                                                                                             | 1     | 0  | S03    |
| .....aagaaaa <u>cagggg</u> gauucugau.....                                                                                                           | 1     | 0  | S03    |
| .....aagaaaa <u>cagggg</u> gauucugaug.....                                                                                                          | 3     | 0  | S03    |
| .....aagaaaa <u>cagggg</u> gauucugauA.....                                                                                                          | 1     | 1  | S03    |
| .....aagaaaa <u>cagggg</u> gauucugaugg.....                                                                                                         | 5     | 0  | S03    |
| .....agaaaa <u>cagggg</u> gauucugau.....                                                                                                            | 1     | 0  | S03    |
| .....agaaaa <u>cagggg</u> gauucugaug.....                                                                                                           | 1     | 0  | S03    |
| .....agaaaa <u>cagggg</u> gauucugauggc.....                                                                                                         | 3     | 0  | S03    |
| .....agaaaa <u>cagggg</u> gauucugauggU.....                                                                                                         | 1     | 1  | S03    |
| .....agaaaa <u>cagggg</u> gauucugauggc.....                                                                                                         | 1     | 1  | S03    |
| .....gaaaa <u>cagggg</u> gauucugauggc.....                                                                                                          | 1     | 0  | S03    |
| .....aaaa <u>cagggg</u> gauucugaugg.....                                                                                                            | 1     | 0  | S03    |
| .....aaaa <u>cagggg</u> gauucugauggc.....                                                                                                           | 1     | 0  | S03    |
| .....aaaa <u>cagggg</u> gauucugauggccg.....                                                                                                         | 1     | 1  | S03    |
| .....Naaa <u>cagggg</u> gauucugauggccg.....                                                                                                         | 1     | 1  | S03    |
| .....aaaa <u>cagggg</u> gauucugauggccg.....                                                                                                         | 2     | 0  | S03    |
| .....aaa <u>cagggg</u> gauucugaug.....                                                                                                              | 1     | 0  | S03    |
| .....aaa <u>cagggg</u> gauucugauggccga.....                                                                                                         | 1     | 0  | S03    |
| .....guccaaguccccauc <u>u</u> guugU.....                                                                                                            | 1     | 1  | S04    |
| .....acuacaagaaaa <u>cagggg</u> gauucu.....                                                                                                         | 2     | 0  | S04    |
| .....uacaagaaaa <u>cagggg</u> gauucuga.....                                                                                                         | 1     | 0  | S04    |
| .....acaagaaaa <u>cagggg</u> gauucugaC.....                                                                                                         | 1     | 1  | S04    |
| .....acaagaaaa <u>cagggg</u> gauucugau.....                                                                                                         | 3     | 0  | S04    |
| .....acaagaaaa <u>cagggg</u> gauucugaug.....                                                                                                        | 1     | 0  | S04    |
| .....aagaaaa <u>cagggg</u> gauucugaug.....                                                                                                          | 4     | 0  | S04    |
| .....aagaaaa <u>cagggg</u> gauucuAaugg.....                                                                                                         | 1     | 1  | S04    |
| .....aagaaaa <u>cagggg</u> gauucugaugg.....                                                                                                         | 8     | 0  | S04    |
| .....aagaaaa <u>cagggg</u> gauucugaugg.....                                                                                                         | 2     | 1  | S04    |
| .....aagaaaa <u>cagggg</u> gauucugauggc.....                                                                                                        | 1     | 0  | S04    |
| .....agaaaa <u>cagggg</u> gauucugau.....                                                                                                            | 1     | 0  | S04    |
| .....agaaaa <u>cagggg</u> gauucugaug.....                                                                                                           | 2     | 0  | S04    |

Star

Mature

|                                                                                                                                                                                                                                                                                                                                                                                                                                       |         |   |   |
|---------------------------------------------------------------------------------------------------------------------------------------------------------------------------------------------------------------------------------------------------------------------------------------------------------------------------------------------------------------------------------------------------------------------------------------|---------|---|---|
| ccgcuuaguauuguccaaug <u>guc</u> ca <u>aa</u> g <u>ucc</u> ca <u>aa</u> g <u>ucc</u> ca <u>uu</u> g <u>u</u> g <u>cu</u> u <u>cc</u> u <u>cu</u> cc <u>cc</u> u <u>uu</u> u <u>uu</u> au <u>ag</u> u <u>cu</u> g <u>cu</u> g <u>cc</u> u <u>g</u> c <u>ac</u> u <u>a</u> c <u>a</u> g <u>a</u> g <u>a</u> a <u>a</u> a <u>a</u> c <u>ag</u> g <u>g</u> g <u>g</u> a <u>u</u> c <u>u</u> g <u>a</u> u <u>g</u> g <u>cc</u> g <u>a</u> a |         |   |   |
| .....                                                                                                                                                                                                                                                                                                                                                                                                                                 | .agaaaa | 2 | 0 |
| .....                                                                                                                                                                                                                                                                                                                                                                                                                                 | .agaaaa | 1 | 1 |
| .....                                                                                                                                                                                                                                                                                                                                                                                                                                 | .agaaaa | 1 | 1 |
| .....                                                                                                                                                                                                                                                                                                                                                                                                                                 | .Naaaa  | 1 | 1 |
| .....                                                                                                                                                                                                                                                                                                                                                                                                                                 | .gaaaa  | 1 | 0 |
| .....                                                                                                                                                                                                                                                                                                                                                                                                                                 | .aaaa   | 2 | 0 |
| .....                                                                                                                                                                                                                                                                                                                                                                                                                                 | .aaaa   | 4 | 0 |
| .....                                                                                                                                                                                                                                                                                                                                                                                                                                 | .aaaa   | 1 | 1 |
| .....                                                                                                                                                                                                                                                                                                                                                                                                                                 | .aaaa   | 2 | 0 |
| .....                                                                                                                                                                                                                                                                                                                                                                                                                                 | .aaac   | 1 | 0 |
| .....                                                                                                                                                                                                                                                                                                                                                                                                                                 | .aaac   | 1 | 0 |
| .....                                                                                                                                                                                                                                                                                                                                                                                                                                 | .aaac   | 2 | 0 |
| .....                                                                                                                                                                                                                                                                                                                                                                                                                                 | .aaac   | 1 | 0 |
| .....                                                                                                                                                                                                                                                                                                                                                                                                                                 | .aaac   | 2 | 0 |
| .....                                                                                                                                                                                                                                                                                                                                                                                                                                 | .aaac   | 1 | 0 |
| .....                                                                                                                                                                                                                                                                                                                                                                                                                                 | .aac    | 2 | 0 |
| .....                                                                                                                                                                                                                                                                                                                                                                                                                                 | .aac    | 1 | 1 |
| .....                                                                                                                                                                                                                                                                                                                                                                                                                                 | .aac    | 2 | 0 |
| .....                                                                                                                                                                                                                                                                                                                                                                                                                                 | .ac     | 1 | 0 |
| .....                                                                                                                                                                                                                                                                                                                                                                                                                                 | .ac     | 2 | 0 |
| .....                                                                                                                                                                                                                                                                                                                                                                                                                                 | .ag     | 2 | 0 |
| .....                                                                                                                                                                                                                                                                                                                                                                                                                                 | .ag     | 1 | 1 |
| .....                                                                                                                                                                                                                                                                                                                                                                                                                                 | .ag     | 1 | 0 |
| .....                                                                                                                                                                                                                                                                                                                                                                                                                                 | .ggg    | 1 | 1 |
| .....                                                                                                                                                                                                                                                                                                                                                                                                                                 | .ggg    | 1 | 0 |



Provisional ID : chrC06\_1943036  
 Score total : 0.3  
 Score for star read(s) : -1.3  
 Score for read counts : 0  
 Score for mfe : 1.6  
 Score for randfold : 0  
 Score for cons. seed :  
 Total read count : 29  
 Mature read count : 29  
 Loop read count : 0  
 Star read count : 0

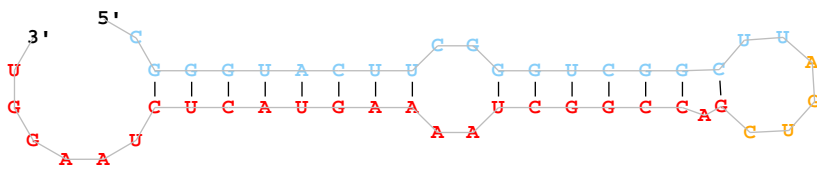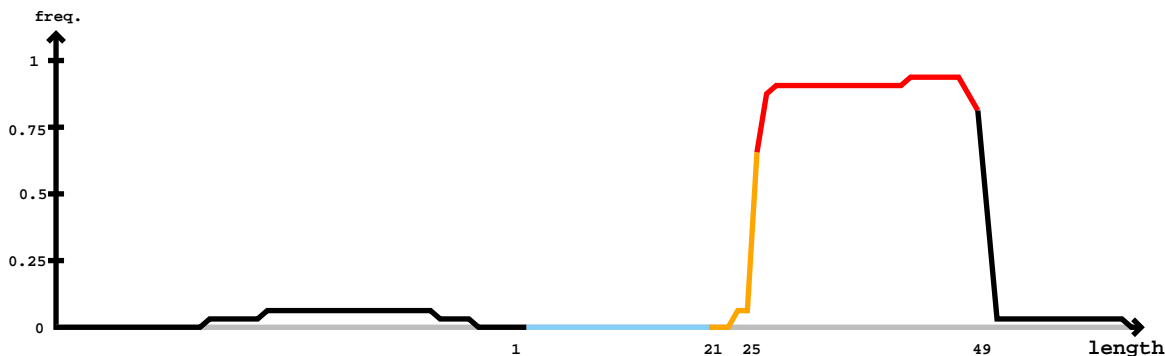

Star
Mature

| 5' - gaugugagaggaagaguauaacgggcccugggcaaaguucucuccaagc <span style="color: blue;">cgggguacuu</span> <span style="color: yellow;">cgggucgguu</span> <span style="color: red;">agucgaccggcu</span> <span style="color: red;">aaaaguaucucuaaggu</span> cgagcuaacgcucuuua -3' | exp   |    |        |
|---------------------------------------------------------------------------------------------------------------------------------------------------------------------------------------------------------------------------------------------------------------------------|-------|----|--------|
|                                                                                                                                                                                                                                                                           | reads | mm | sample |
| .....cgggcccugggcaaaguucucuU.....                                                                                                                                                                                                                                         | 1     | 1  | S03    |
| .....ucgaccggcuaaaaguacucuaagg.....                                                                                                                                                                                                                                       | 1     | 0  | S03    |
| .....gaccggcuaaaaguacucuaaggu.....                                                                                                                                                                                                                                        | 3     | 0  | S03    |
| .....gaccggcuaaaagAACucuaaggu.....                                                                                                                                                                                                                                        | 1     | 1  | S03    |
| .....accgUcuaaaaguacucuaag.....                                                                                                                                                                                                                                           | 1     | 1  | S03    |
| .....accggcuaaaaguacucuaagguc.....                                                                                                                                                                                                                                        | 4     | 0  | S03    |
| .....ucuaaggucgagcuaacgcuuu.....                                                                                                                                                                                                                                          | 1     | 0  | S03    |
| .....aguauacgggcccugggUaaaguuc.....                                                                                                                                                                                                                                       | 1     | 1  | S04    |
| .....Gcgaccggcuaaaaguacucuaag.....                                                                                                                                                                                                                                        | 1     | 1  | S04    |
| .....gaccggcuaaaaguacucuaagg.....                                                                                                                                                                                                                                         | 1     | 0  | S04    |
| .....gaccggcuaaaaguacucuaaggG.....                                                                                                                                                                                                                                        | 1     | 1  | S04    |
| .....gaccggcuaaaaguacucuaaggu.....                                                                                                                                                                                                                                        | 7     | 0  | S04    |
| .....gaccggcuaaaagCacucuaaggu.....                                                                                                                                                                                                                                        | 2     | 1  | S04    |
| .....gaccgUcuaaaaguacucuaaggu.....                                                                                                                                                                                                                                        | 1     | 1  | S04    |
| .....gaccggcuaaaaguacucuaUggu.....                                                                                                                                                                                                                                        | 1     | 1  | S04    |
| .....gaccggcuaaaGguacucuaaggu.....                                                                                                                                                                                                                                        | 1     | 1  | S04    |
| .....gaccggcuaaaagAACucuaaggu.....                                                                                                                                                                                                                                        | 1     | 1  | S04    |
| .....accggcuaaaaguacucuaagguG.....                                                                                                                                                                                                                                        | 1     | 1  | S04    |
| .....accggcuaaaaguacucuaagguU.....                                                                                                                                                                                                                                        | 1     | 1  | S04    |
| .....ccggcuaaaaguacucuaaggu.....                                                                                                                                                                                                                                          | 1     | 0  | S04    |



Provisional ID : chrC06\_1958091  
 Score total : 0.9  
 Score for star read(s) : -1.3  
 Score for read counts : 0  
 Score for mfe : 2.2  
 Score for randfold : 0  
 Score for cons. seed :  
 Total read count : 103  
 Mature read count : 103  
 Loop read count : 0  
 Star read count : 0

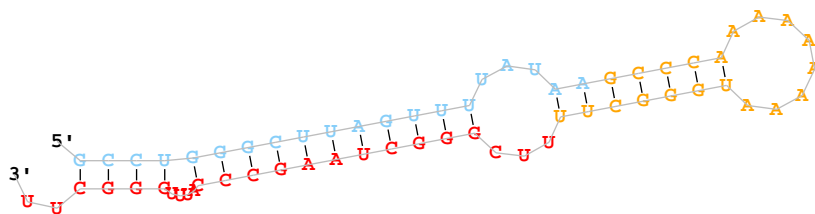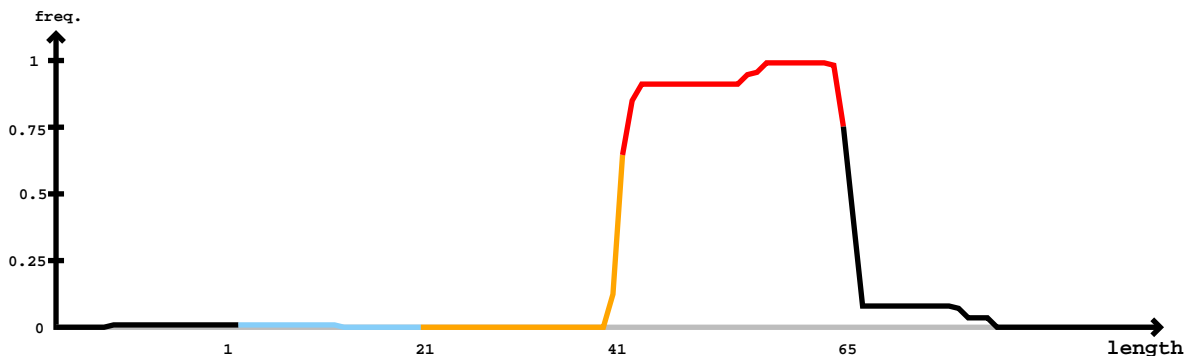

Star Mature

| 5' -                                                                                                           | 3' - | exp | reads | mm | sample |
|----------------------------------------------------------------------------------------------------------------|------|-----|-------|----|--------|
| gccuaaaaauuaccgggcccugggcuuaguuuuuaagcccaaaaaaaaaugggcuuuucgggcuuaagcccauugggcuuuggacauuugggcuuaagcccguaugggcu |      |     |       |    |        |
| .....uaaaaauuUcgggcccugggcuua.....                                                                             |      |     | 1     | 1  | S03    |
| .....uuucgggcuuaGgcccuuugggcu.....                                                                             |      |     | 1     | 1  | S03    |
| .....uuucgggcuuaagcccauugggcu.....                                                                             |      |     | 1     | 1  | S03    |
| .....uucgggcuuaagcccauugggcu.....                                                                              |      |     | 3     | 0  | S03    |
| .....uucgggcuuaagcccgguugggcuu.....                                                                            |      |     | 1     | 1  | S03    |
| .....uuucgggcuuaagcccauugggcuu.....                                                                            |      |     | 11    | 0  | S03    |
| .....ucgggcuuaagcccauugggcu.....                                                                               |      |     | 1     | 0  | S03    |
| .....ucgggcuuaagcccauugggcuu.....                                                                              |      |     | 5     | 0  | S03    |
| .....uUgggcuuaagcccauugggcuu.....                                                                              |      |     | 1     | 1  | S03    |
| .....ucgggcuuaagcccauugggcuG.....                                                                              |      |     | 1     | 1  | S03    |
| .....cgggcuuaagcccauugggc.....                                                                                 |      |     | 1     | 0  | S03    |
| .....cgggcuuaagcccauugggcuu.....                                                                               |      |     | 1     | 0  | S03    |
| .....cgggcuuaagcccCuugggcuu.....                                                                               |      |     | 1     | 1  | S03    |
| .....cCuugggcuuuggacauuuggg.....                                                                               |      |     | 1     | 1  | S03    |
| .....uuucgggcuuaGgcccuuugggcu.....                                                                             |      |     | 1     | 1  | S04    |
| .....Nuucgggcuuaagcccauugggcu.....                                                                             |      |     | 1     | 1  | S04    |
| .....uuucgggcuuaagcccauugggcC.....                                                                             |      |     | 1     | 1  | S04    |
| .....uuucgggcuuaagcccauugggcu.....                                                                             |      |     | 7     | 0  | S04    |
| .....uuucgggcuuaagcccauugggcA.....                                                                             |      |     | 1     | 1  | S04    |
| .....uuucgggcuuaagcccauugggcuu.....                                                                            |      |     | 1     | 0  | S04    |
| .....uucgggcuuaagcccauugggcu.....                                                                              |      |     | 4     | 0  | S04    |
| .....uucgggcuuaagcccauugggcA.....                                                                              |      |     | 1     | 1  | S04    |
| .....uUcgggcuuaagcccauugggcuu.....                                                                             |      |     | 1     | 1  | S04    |
| .....uuucgggcuuaagcccauugggcu.....                                                                             |      |     | 1     | 1  | S04    |
| .....uuucgggcuuaagcccauugggcuu.....                                                                            |      |     | 35    | 0  | S04    |
| .....uuucgggcuuaagcccauugggcuu.....                                                                            |      |     | 1     | 1  | S04    |
| .....uucgggcuuaagcccauugggcAu.....                                                                             |      |     | 1     | 1  | S04    |
| .....uucgggcuuaagcccauugggcu.....                                                                              |      |     | 1     | 0  | S04    |
| .....uucgggcuuaagcccauugggcuG.....                                                                             |      |     | 1     | 1  | S04    |
| .....uucgggcuuaagcccauugggcuu.....                                                                             |      |     | 11    | 0  | S04    |
| .....uucgggcuuaagcccauugggcua.....                                                                             |      |     | 2     | 1  | S04    |
| .....cgggcuuaagcccauugggcu.....                                                                                |      |     | 3     | 0  | S04    |
| .....cgggcuuaagcccauugggcuu.....                                                                               |      |     | 1     | 0  | S04    |



Star

Mature

|                                                                                                                 |   |   |     |
|-----------------------------------------------------------------------------------------------------------------|---|---|-----|
| gccuaaaaauaccgggcccugggcuuaguuuuuaagcccaaaaaaaaaaugggcuuuucgggcuagcccauuugggcuuuggacauuuugggcuuaggccgcuauugggcu |   |   |     |
| .....cauugggcuuuggacauuuugA.....                                                                                | 1 | 1 | S04 |
| .....cauugggcuuuggacauuuugg.....                                                                                | 2 | 0 | S04 |
| .....auugggcuuuggacauuuugggc.....                                                                               | 1 | 0 | S04 |
| .....uuugggcuuuggacauuuug.....                                                                                  | 1 | 0 | S04 |
| .....uuugggcuuuggacauuuuggcA.....                                                                               | 1 | 1 | S04 |
| .....uuugggcuuuggacauuuugggc.....                                                                               | 1 | 0 | S04 |
| .....uuugggcuuuggacauuuugggcU.....                                                                              | 1 | 1 | S04 |

Provisional ID : chrC06\_1959619  
 Score total : 0.4  
 Score for star read(s) : -1.3  
 Score for read counts : 0  
 Score for mfe : 1.7  
 Score for randfold : 0  
 Score for cons. seed :  
 Total read count : 66  
 Mature read count : 66  
 Loop read count : 0  
 Star read count : 0

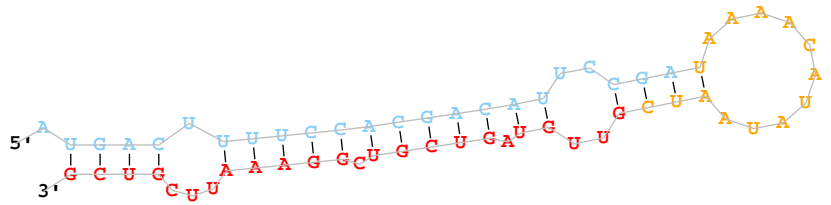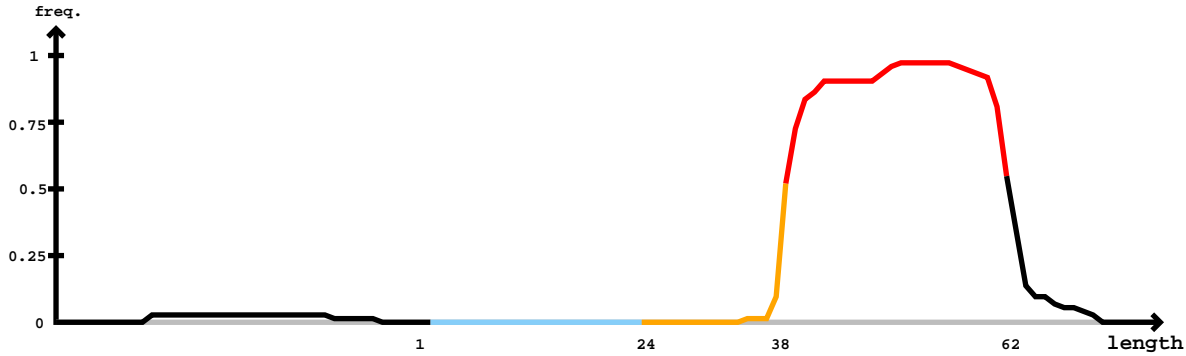

**Star** **Mature**

| 5' -                                                                                                                                                                      | 3' | exp | reads | mm | sample |
|---------------------------------------------------------------------------------------------------------------------------------------------------------------------------|----|-----|-------|----|--------|
| gaauauccggagaaacauggcucgucggaauuuucugaugacu <u>uuuccacgacauuccg</u> uaaaaa <u>caua</u> uaa <u>ucg</u> uu <u>guaguagucgucg</u> gaaa <u>uucgucg</u> gaa <u>auaccg</u> auaaa |    |     |       |    |        |
| .....(((.(...).))...(((.(.(((((((((.(.((((((((((((.(.....))))).)))).)))))))).))))))....                                                                                   |    |     |       |    |        |
| .....cguuguagucgucggaauuucgu.....                                                                                                                                         |    |     | 1     | 0  | S03    |
| .....cguuguagucgucggaauuucguc.....                                                                                                                                        |    |     | 1     | 0  | S03    |
| .....Uuuguagucgucggaauu.....                                                                                                                                              |    |     | 1     | 1  | S03    |
| .....guuguagucgucggaauu.....                                                                                                                                              |    |     | 1     | 0  | S03    |
| .....guuUuagucgucggaauuucguc.....                                                                                                                                         |    |     | 1     | 1  | S03    |
| .....guuguagucgucggaauuucguc.....                                                                                                                                         |    |     | 3     | 0  | S03    |
| .....guuguagAcgucggaauuucguc.....                                                                                                                                         |    |     | 1     | 1  | S03    |
| .....guuguagucgucggaauuucgucA.....                                                                                                                                        |    |     | 2     | 1  | S03    |
| .....Uuuguagucgucggaauuucgucg.....                                                                                                                                        |    |     | 1     | 1  | S03    |
| .....guuguagucgucggaauuucgucg.....                                                                                                                                        |    |     | 2     | 0  | S03    |
| .....guuguagCgucggaauuucgucg.....                                                                                                                                         |    |     | 1     | 1  | S03    |
| .....guuguagucgucggaauuucgucgga.....                                                                                                                                      |    |     | 1     | 0  | S03    |
| .....uuguagucgucggaauuucguc.....                                                                                                                                          |    |     | 1     | 0  | S03    |
| .....uguagucgucggaauuucguc.....                                                                                                                                           |    |     | 1     | 0  | S03    |
| .....uguagucgucggaauuucgucA.....                                                                                                                                          |    |     | 1     | 1  | S03    |
| .....uagucgucggaauuucgucgg.....                                                                                                                                           |    |     | 1     | 0  | S03    |
| .....uagucgucggaauuucgucgga.....                                                                                                                                          |    |     | 1     | 0  | S03    |
| .....gaggaacauggcucgCcg.....                                                                                                                                              |    |     | 1     | 1  | S04    |
| .....gaggaacauggcucgucggaauu.....                                                                                                                                         |    |     | 1     | 0  | S04    |
| .....aaucguuguagucgucggaauuG.....                                                                                                                                         |    |     | 1     | 1  | S04    |
| .....cguuguagucgucggaauuucg.....                                                                                                                                          |    |     | 1     | 0  | S04    |
| .....cguuguagucgucggaauuucguc.....                                                                                                                                        |    |     | 3     | 0  | S04    |
| .....guuguagucgucggaauuucgu.....                                                                                                                                          |    |     | 4     | 0  | S04    |
| .....guuguagucgucggaauuucguU.....                                                                                                                                         |    |     | 2     | 1  | S04    |
| .....guuguagucgucggaauuucguc.....                                                                                                                                         |    |     | 2     | 0  | S04    |
| .....guuguagucgucggaauuucgucA.....                                                                                                                                        |    |     | 2     | 1  | S04    |
| .....gGuguagucgucggaauuucgucg.....                                                                                                                                        |    |     | 1     | 1  | S04    |
| .....guuguagucgucggaauuucgucg.....                                                                                                                                        |    |     | 6     | 0  | S04    |
| .....uuguagucgucggaauuucguc.....                                                                                                                                          |    |     | 2     | 0  | S04    |
| .....uuguagucgucggaauuucguc.....                                                                                                                                          |    |     | 3     | 0  | S04    |
| .....uuguagucgucggaauuucgucU.....                                                                                                                                         |    |     | 1     | 1  | S04    |
| .....uuguagucgucggaauuucgucA.....                                                                                                                                         |    |     | 4     | 1  | S04    |
| .....uuguagucgucggaauuucgucg.....                                                                                                                                         |    |     | 2     | 0  | S04    |

Star

Mature

|                                    |                         |             |                                   |      |     |  |
|------------------------------------|-------------------------|-------------|-----------------------------------|------|-----|--|
| gaauaucgaggaacauggcucgucggaauuuucg | augacuuuuccacgacauuccg  | aaaacauaaau | cgugugugucgucggaauucgucggaauuaccg | uaaa |     |  |
| .....                              | uuguagucgucggaauucgucg  | .....       | 2                                 | 0    | S04 |  |
| .....                              | uguagucgucggaauucgu     | .....       | 1                                 | 0    | S04 |  |
| .....                              | uguagucgucggaauucgucg   | .....       | 1                                 | 0    | S04 |  |
| .....                              | uguagucgucggaauucgucA   | .....       | 1                                 | 1    | S04 |  |
| .....                              | uguagucgucggaauucgucG   | .....       | 1                                 | 1    | S04 |  |
| .....                              | uguagucgucggaauucgucgga | .....       | 2                                 | 0    | S04 |  |
| .....                              | guagucgucggaauucgucg    | .....       | 1                                 | 0    | S04 |  |
| .....                              | guagucgucggaauucgucgg   | .....       | 1                                 | 0    | S04 |  |
| .....                              | uagucgucggaauucgucggaau | .....       | 1                                 | 0    | S04 |  |
| .....                              | ucggaauucgucggaauua     | .....       | 1                                 | 0    | S04 |  |
| .....                              | ucggaauucgucggaauuac    | .....       | 1                                 | 0    | S04 |  |
| .....                              | cggaauucgucggaaua       | .....       | 1                                 | 0    | S04 |  |
| .....                              | cggaauucgucggaauuacc    | .....       | 1                                 | 0    | S04 |  |
| .....                              | Ugaaauucgucggaauuacc    | .....       | 1                                 | 1    | S04 |  |

Provisional ID : chrC06\_1960688  
 Score total : 1  
 Score for star read(s) : 3.9  
 Score for read counts : -3.9  
 Score for mfe : 1.1  
 Score for randfold : 0  
 Score for cons. seed :  
 Total read count : 4  
 Mature read count : 2  
 Loop read count : 1  
 Star read count : 1

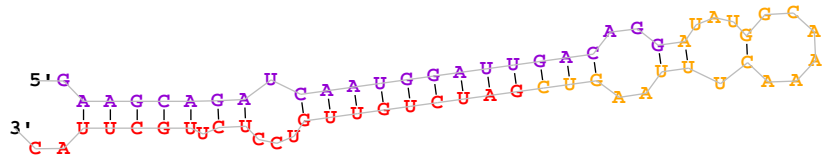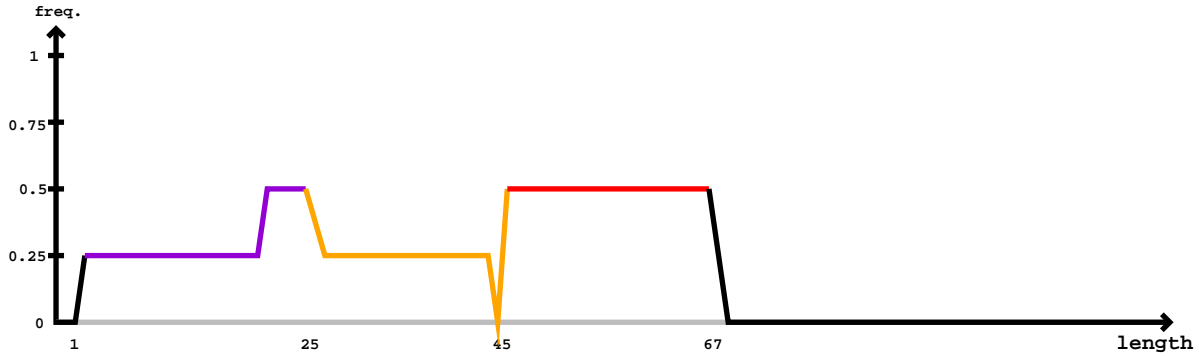

**Star**

**Mature**

| 5' -                                                          |                             | -3'                   | obs                                             | exp | reads | mm  | sample |
|---------------------------------------------------------------|-----------------------------|-----------------------|-------------------------------------------------|-----|-------|-----|--------|
| agaagcagaucaauuggauugacagg                                    | auaugggcaaaacuuaaaguc       | gaucuguguccucucugcuua | caagaaggacauuguguccacuacuuggauggugaugcgcaccucug | 1   | 0     | S03 |        |
| agaagcagaucaauuggauuga                                        | caggauaugggcaaaacuuaaaguc   | gaucuguguccucucugcuua | caagaaggacauuguguccacuacuuggauggugaugcgcaccucug | 1   | 0     | S03 |        |
| ..(((((((.....)))))).....((((.....)))).....((((.....))))..... |                             |                       |                                                 | 1   | 0     | S04 |        |
| .gaagcagaucaauuggauugacagg.....                               | .gaucuguguccucucugcuua..... |                       |                                                 | 1   | 1     | S04 |        |
| .....acaggauaugggcaaaacuuaaagu.....                           |                             |                       |                                                 |     |       |     |        |
| .....gaucuguguccucucugcuuaU.....                              |                             |                       |                                                 |     |       |     |        |

Provisional ID : chrC06\_2008268  
 Score total : 0.8  
 Score for star read(s) : -1.3  
 Score for read counts : 0  
 Score for mfe : 2.1  
 Score for randfold : 0  
 Score for cons. seed :  
 Total read count : 483  
 Mature read count : 483  
 Loop read count : 0  
 Star read count : 0

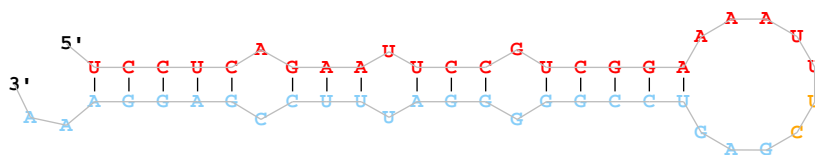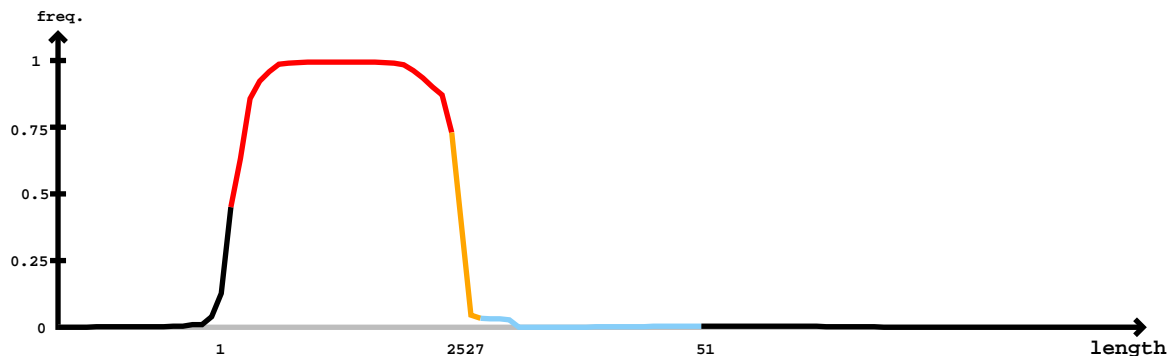

**Mature**                      **Star**

| 5' -                                                                                                                                                                        | -3' | exp | reads | mm | sample |
|-----------------------------------------------------------------------------------------------------------------------------------------------------------------------------|-----|-----|-------|----|--------|
| uccucggaauuuuguuccucagaa <u>uuccgucgga</u> aaaa <u>uuucgagucgggggauuuucgagga</u> aaaga <sup>Star</sup> aaaa <u>uuccgagga</u> aa <u>uuuucagagg</u> acu <u>guuuucgucg</u> aua |     |     |       |    |        |
| .....uuuCu <u>uuccucagaa</u> uuccguc.....                                                                                                                                   |     |     | 1     | 1  | S03    |
| .....uuuccucagaa <u>uuccgucg</u> g.....                                                                                                                                     |     |     | 2     | 0  | S03    |
| .....uuuccucagaa <u>uuccgucg</u> ga.....                                                                                                                                    |     |     | 1     | 0  | S03    |
| .....uuuccucagaa <u>uuccgucg</u> gaa.....                                                                                                                                   |     |     | 1     | 0  | S03    |
| .....uuuccucagaa <u>uuccgucg</u> gaaaa.....                                                                                                                                 |     |     | 4     | 0  | S03    |
| .....uuccucagaa <u>uuccgucg</u> ga.....                                                                                                                                     |     |     | 1     | 0  | S03    |
| .....uuccucagaa <u>uuccgucg</u> gaaa.....                                                                                                                                   |     |     | 1     | 0  | S03    |
| .....uuccucagaa <u>uuccgucg</u> gaaaa.....                                                                                                                                  |     |     | 1     | 0  | S03    |
| .....uuccucagaa <u>uuccgucg</u> gaaaaC.....                                                                                                                                 |     |     | 1     | 1  | S03    |
| .....uuccucagaa <u>uuccgucg</u> gaaaau.....                                                                                                                                 |     |     | 16    | 0  | S03    |
| .....uuccucagaa <u>uuccgucg</u> gaaaauu.....                                                                                                                                |     |     | 3     | 0  | S03    |
| .....uccucagaa <u>uuccgucg</u> ga.....                                                                                                                                      |     |     | 1     | 0  | S03    |
| .....uccucagaa <u>uuccgucg</u> gaaaa.....                                                                                                                                   |     |     | 2     | 0  | S03    |
| .....uccucagaa <u>uuccgucg</u> gaaaaC.....                                                                                                                                  |     |     | 2     | 1  | S03    |
| .....uccucagaa <u>uuccgucg</u> gaaaauu.....                                                                                                                                 |     |     | 77    | 0  | S03    |
| .....uccucagaa <u>uuccgucg</u> gaaaauu.....                                                                                                                                 |     |     | 1     | 1  | S03    |
| .....uccucagaa <u>uuccgucg</u> gaaaau.....                                                                                                                                  |     |     | 4     | 1  | S03    |
| .....uccucagaa <u>uuccgucg</u> gaaaauG.....                                                                                                                                 |     |     | 3     | 1  | S03    |
| .....uccucagaa <u>uuccgucg</u> gaaaaCu.....                                                                                                                                 |     |     | 1     | 1  | S03    |
| .....uccucaga <u>Guuccgucg</u> gaaaauu.....                                                                                                                                 |     |     | 1     | 1  | S03    |
| .....uccucagaa <u>uuccg</u> Ccgaaaauu.....                                                                                                                                  |     |     | 1     | 1  | S03    |
| .....Cccucagaa <u>uuccgucg</u> gaaaauu.....                                                                                                                                 |     |     | 1     | 1  | S03    |
| .....uccucagaa <u>uuccgucg</u> Gaaaauu.....                                                                                                                                 |     |     | 1     | 1  | S03    |
| .....ccucagaa <u>uuccgucg</u> G.....                                                                                                                                        |     |     | 1     | 1  | S03    |
| .....ccucagaa <u>uuccgucg</u> ga.....                                                                                                                                       |     |     | 2     | 0  | S03    |
| .....ccucagaa <u>uuccgucg</u> gaa.....                                                                                                                                      |     |     | 2     | 0  | S03    |
| .....ccucagaa <u>uuccgucg</u> gaaa.....                                                                                                                                     |     |     | 1     | 0  | S03    |
| .....ccucagaa <u>uuccgucg</u> gaaaauu.....                                                                                                                                  |     |     | 7     | 0  | S03    |
| .....ccucaga <u>Guuccgucg</u> gaaaauu.....                                                                                                                                  |     |     | 1     | 1  | S03    |
| .....Gcucagaa <u>uuccgucg</u> gaaaauu.....                                                                                                                                  |     |     | 1     | 1  | S03    |
| .....Ncucagaa <u>uuccgucg</u> gaaaauu.....                                                                                                                                  |     |     | 1     | 1  | S03    |
| .....ccucagaa <u>uuccgucg</u> gaaaau.....                                                                                                                                   |     |     | 2     | 1  | S03    |
| .....ccucagaa <u>uuccgucg</u> gaaaauu.....                                                                                                                                  |     |     | 23    | 0  | S03    |

Mature

Star

| Sequence                                                                                                                                                                                      | Mature Count | Star Count | Category |
|-----------------------------------------------------------------------------------------------------------------------------------------------------------------------------------------------|--------------|------------|----------|
| uccucggaauuuuguuuccucagaa <u>u</u> ccgucgga <u>aa</u> uuuucgaguccg <u>gg</u> gga <u>uu</u> uccgagga <u>aa</u> gaagaa <u>uu</u> ccgagga <u>uu</u> uuuuucagagg <u>ac</u> uuuuucgucg <u>au</u> a | 1            | 1          | S03      |
| .....ccucagaa <u>u</u> ccgucgga <u>aa</u> uuuG.....                                                                                                                                           | 7            | 0          | S03      |
| .....ccucagaa <u>u</u> ccgucgga <u>aa</u> uuu.....                                                                                                                                            | 1            | 0          | S03      |
| .....cucagaa <u>u</u> ccgucgga.....                                                                                                                                                           | 1            | 1          | S03      |
| .....cucagaa <u>u</u> ccgucggaC.....                                                                                                                                                          | 1            | 0          | S03      |
| .....cucagaa <u>u</u> ccgucgga <u>aa</u> .....                                                                                                                                                | 1            | 0          | S03      |
| .....cucagaa <u>u</u> ccgucgga <u>aaa</u> .....                                                                                                                                               | 7            | 0          | S03      |
| .....cucagaa <u>u</u> ccgucgga <u>aaaa</u> .....                                                                                                                                              | 4            | 1          | S03      |
| .....cucagaa <u>u</u> ccgucgga <u>aaaa</u> C.....                                                                                                                                             | 1            | 1          | S03      |
| .....cucagaa <u>u</u> ccgucgga <u>aaaa</u> uu.....                                                                                                                                            | 1            | 1          | S03      |
| .....cucagaa <u>u</u> ccgucgga <u>aaaa</u> uuC.....                                                                                                                                           | 1            | 1          | S03      |
| .....cucagaa <u>u</u> ccgucgga <u>aaaa</u> uuG.....                                                                                                                                           | 1            | 1          | S03      |
| .....Uucagaa <u>u</u> ccgucgga <u>aaaa</u> uu.....                                                                                                                                            | 1            | 1          | S03      |
| .....cucagaa <u>u</u> ccgucgga <u>aaaa</u> uA.....                                                                                                                                            | 1            | 1          | S03      |
| .....cucagaa <u>u</u> ccgucgga <u>aaaa</u> uu.....                                                                                                                                            | 45           | 0          | S03      |
| .....ucagaa <u>u</u> ccgucgga <u>aaaa</u> .....                                                                                                                                               | 1            | 0          | S03      |
| .....ucagaa <u>u</u> ccgucgga <u>aaaa</u> C.....                                                                                                                                              | 3            | 1          | S03      |
| .....ucagaa <u>u</u> ccgucgga <u>aaaa</u> uu.....                                                                                                                                             | 1            | 1          | S03      |
| .....ucagaa <u>u</u> ccgucgga <u>aaaa</u> uu.....                                                                                                                                             | 7            | 0          | S03      |
| .....ucagaa <u>u</u> ccgucgga <u>aaaa</u> uuu.....                                                                                                                                            | 1            | 0          | S03      |
| .....ucagaa <u>u</u> ccgucgga <u>aaaa</u> uuA <u>cg</u> .....                                                                                                                                 | 1            | 1          | S03      |
| .....cagaa <u>u</u> ccgucgga <u>aaaa</u> .....                                                                                                                                                | 1            | 0          | S03      |
| .....cagaa <u>u</u> ccA <u>uc</u> gga <u>aaaa</u> uu.....                                                                                                                                     | 1            | 1          | S03      |
| .....cagaa <u>u</u> ccgucgga <u>aaaa</u> uG.....                                                                                                                                              | 1            | 1          | S03      |
| .....cagaa <u>u</u> ccgucgga <u>aaaa</u> Cu.....                                                                                                                                              | 1            | 1          | S03      |
| .....cagaa <u>u</u> ccgucgga <u>aaaa</u> uu.....                                                                                                                                              | 8            | 0          | S03      |
| .....Nagaa <u>u</u> ccgucgga <u>aaaa</u> uuu.....                                                                                                                                             | 1            | 1          | S03      |
| .....cagaa <u>u</u> ccgucgga <u>aaaa</u> uuu <u>c</u> .....                                                                                                                                   | 1            | 0          | S03      |
| .....agaa <u>u</u> ccgucgga <u>aaaa</u> uu.....                                                                                                                                               | 1            | 0          | S03      |
| .....agaa <u>u</u> ccgucgga <u>aaaa</u> uuu.....                                                                                                                                              | 1            | 0          | S03      |
| .....agaa <u>u</u> ccgucgga <u>aaaa</u> uuu <u>cgag</u> .....                                                                                                                                 | 1            | 0          | S03      |
| .....agaa <u>u</u> ccgucgga <u>aaaa</u> uuu <u>Ccgagu</u> .....                                                                                                                               | 5            | 1          | S03      |
| .....aa <u>u</u> ccgucgga <u>aaaa</u> uuG <u>cgag</u> .....                                                                                                                                   | 1            | 1          | S03      |
| .....cucgga <u>uu</u> uuuguuU <u>cuca</u> .....                                                                                                                                               | 1            | 1          | S04      |
| .....ugu <u>uu</u> uccucagaa <u>u</u> ccgucgga <u>u</u> A.....                                                                                                                                | 2            | 1          | S04      |
| .....ugu <u>uu</u> uccucagaa <u>u</u> ccgucgga.....                                                                                                                                           | 1            | 0          | S04      |
| .....uu <u>u</u> ccucagaa <u>u</u> ccgucU.....                                                                                                                                                | 1            | 1          | S04      |
| .....uu <u>u</u> ccucagaa <u>u</u> ccgucgga.....                                                                                                                                              | 1            | 0          | S04      |
| .....uu <u>u</u> ccucagaa <u>u</u> ccgucgga.....                                                                                                                                              | 2            | 0          | S04      |
| .....uu <u>u</u> ccucagaa <u>u</u> ccgucgga.....                                                                                                                                              | 2            | 0          | S04      |
| .....uu <u>u</u> ccucagaa <u>u</u> ccgucgga <u>u</u> .....                                                                                                                                    | 1            | 1          | S04      |
| .....u <u>u</u> ccucagaa <u>u</u> ccgucgga.....                                                                                                                                               | 1            | 0          | S04      |
| .....u <u>u</u> ccucagaa <u>u</u> ccgucgga <u>u</u> G.....                                                                                                                                    | 1            | 1          | S04      |
| .....u <u>u</u> ccucagaa <u>u</u> ccgucgga <u>u</u> C.....                                                                                                                                    | 1            | 1          | S04      |
| .....u <u>u</u> ccucagaa <u>u</u> ccgucgga <u>u</u> .....                                                                                                                                     | 4            | 0          | S04      |
| .....u <u>u</u> ccucagaa <u>u</u> ccgucgga <u>u</u> .....                                                                                                                                     | 12           | 0          | S04      |
| .....u <u>u</u> ccucagaa <u>u</u> ccgucgga <u>u</u> Gaa <u>u</u> .....                                                                                                                        | 1            | 1          | S04      |
| .....u <u>u</u> ccucagaa <u>u</u> ccgucgga <u>u</u> .....                                                                                                                                     | 1            | 0          | S04      |
| .....u <u>u</u> ccucagaa <u>u</u> ccgucgga <u>u</u> .....                                                                                                                                     | 5            | 0          | S04      |
| .....u <u>u</u> ccucagaa <u>u</u> ccgucgga <u>u</u> .....                                                                                                                                     | 3            | 0          | S04      |
| .....u <u>u</u> ccucagaa <u>u</u> ccgucgga <u>u</u> .....                                                                                                                                     | 3            | 0          | S04      |
| .....u <u>u</u> ccucagaa <u>u</u> ccgucgga <u>u</u> Gaa <u>uu</u> .....                                                                                                                       | 2            | 1          | S04      |
| .....u <u>u</u> ccucagaa <u>u</u> U <u>cg</u> ucgga <u>uu</u> .....                                                                                                                           | 1            | 1          | S04      |
| .....u <u>u</u> ccucagaa <u>u</u> ccgucgga <u>uu</u> C.....                                                                                                                                   | 4            | 1          | S04      |
| .....u <u>u</u> ccucagaa <u>u</u> ccgucgga <u>uu</u> .....                                                                                                                                    | 46           | 0          | S04      |
| .....u <u>u</u> ccucagaa <u>u</u> ccgucgga <u>uu</u> G.....                                                                                                                                   | 1            | 1          | S04      |
| .....u <u>u</u> ccGcagaa <u>u</u> ccgucgga <u>uu</u> .....                                                                                                                                    | 1            | 1          | S04      |
| .....cc <u>u</u> cagaa <u>u</u> ccgucgga.....                                                                                                                                                 | 2            | 0          | S04      |
| .....cc <u>u</u> cagaa <u>u</u> ccgucgga.....                                                                                                                                                 | 2            | 0          | S04      |
| .....cc <u>u</u> cagaa <u>u</u> ccgucgga.....                                                                                                                                                 | 1            | 0          | S04      |
| .....cc <u>u</u> cagaa <u>u</u> ccgucgga <u>uu</u> .....                                                                                                                                      | 6            | 0          | S04      |
| .....cc <u>u</u> Ccagaa <u>u</u> ccgucgga <u>uu</u> .....                                                                                                                                     | 1            | 1          | S04      |
| .....cc <u>u</u> cagaa <u>u</u> ccgucgga <u>uu</u> .....                                                                                                                                      | 20           | 0          | S04      |
| .....cc <u>u</u> cagaa <u>u</u> ccgucgga <u>uu</u> .....                                                                                                                                      | 6            | 0          | S04      |
| .....cc <u>u</u> cagaa <u>u</u> ccgucgga <u>uu</u> A.....                                                                                                                                     | 3            | 1          | S04      |
| .....cc <u>u</u> cagaa <u>u</u> ccgucgga <u>uu</u> U.....                                                                                                                                     | 2            | 1          | S04      |
| .....c <u>u</u> cagaa <u>u</u> ccgucgga.....                                                                                                                                                  | 2            | 0          | S04      |
| .....c <u>u</u> cagaa <u>u</u> ccgucgga <u>u</u> G.....                                                                                                                                       | 1            | 1          | S04      |
| .....c <u>u</u> cagaa <u>u</u> ccgucgga <u>uu</u> .....                                                                                                                                       | 3            | 0          | S04      |
| .....c <u>u</u> cagaa <u>u</u> ccgucgga <u>uu</u> .....                                                                                                                                       | 4            | 0          | S04      |

Mature

Star

|                                                                                                                                                                                     |    |   |     |
|-------------------------------------------------------------------------------------------------------------------------------------------------------------------------------------|----|---|-----|
| uccucggaauuuuguuucucagaa <u>u</u> ccgucgga <u>aa</u> uuuuucgaguccggggg <u>au</u> uucgagga <u>aa</u> gaagaa <u>uu</u> ccgagga <u>uu</u> uuuuucagagg <u>acu</u> guuucgucg <u>au</u> a |    |   |     |
| .....cucagaa <u>u</u> ccgucgga <u>aa</u> aaC.....                                                                                                                                   | 1  | 1 | S04 |
| .....cucagaa <u>u</u> ccgucgga <u>aa</u> aa <u>u</u> .....                                                                                                                          | 28 | 0 | S04 |
| .....cucagaa <u>u</u> ccgucgga <u>aa</u> G <u>au</u> .....                                                                                                                          | 1  | 1 | S04 |
| .....cucaga <u>G</u> uuccgucgga <u>aa</u> aa <u>u</u> .....                                                                                                                         | 1  | 1 | S04 |
| .....cucagaa <u>u</u> ccgucgga <u>aa</u> aaC.....                                                                                                                                   | 1  | 1 | S04 |
| .....cucagaa <u>u</u> ccgucgga <u>aa</u> G <u>au</u> .....                                                                                                                          | 1  | 1 | S04 |
| .....cucagaa <u>u</u> ccgucgga <u>aa</u> G <u>uu</u> .....                                                                                                                          | 1  | 1 | S04 |
| .....cucCgaa <u>u</u> ccgucgga <u>aa</u> aa <u>u</u> .....                                                                                                                          | 1  | 1 | S04 |
| .....cucagaa <u>u</u> Cccgucgga <u>aa</u> aa <u>u</u> .....                                                                                                                         | 1  | 1 | S04 |
| .....cucagaa <u>u</u> ccgucgga <u>aa</u> aa <u>uu</u> .....                                                                                                                         | 1  | 0 | S04 |
| .....cucagaa <u>u</u> ccgucgga <u>aa</u> aa <u>uuu</u> A.....                                                                                                                       | 1  | 1 | S04 |
| .....ucagaa <u>u</u> ccgucgga <u>aa</u> aa <u>u</u> .....                                                                                                                           | 3  | 0 | S04 |
| .....ucagaa <u>u</u> ccgucgga <u>aa</u> aa <u>uu</u> .....                                                                                                                          | 12 | 0 | S04 |
| .....Ncagaa <u>u</u> ccgucgga <u>aa</u> aa <u>uu</u> .....                                                                                                                          | 1  | 1 | S04 |
| .....ucagaa <u>u</u> ccgucgga <u>aa</u> aa <u>uuu</u> .....                                                                                                                         | 2  | 0 | S04 |
| .....ucagaa <u>u</u> ccgucgga <u>aa</u> C <u>au</u> uu <u>c</u> .....                                                                                                               | 1  | 1 | S04 |
| .....cagaa <u>u</u> ccgucgga <u>aa</u> aa <u>u</u> .....                                                                                                                            | 3  | 0 | S04 |
| .....cagaa <u>u</u> ccgucgga <u>aa</u> aa <u>uu</u> .....                                                                                                                           | 1  | 0 | S04 |
| .....aga <u>u</u> ccgucgga <u>aa</u> aa <u>uuu</u> U.....                                                                                                                           | 1  | 1 | S04 |
| .....aga <u>u</u> ccgucgga <u>aa</u> aa <u>uuu</u> Cc <u>g</u> ag <u>u</u> .....                                                                                                    | 5  | 1 | S04 |
| .....gaa <u>u</u> ccgucgga <u>aa</u> aa <u>uuu</u> Cc <u>g</u> ag <u>u</u> .....                                                                                                    | 3  | 1 | S04 |
| .....a <u>u</u> ccgucgga <u>aa</u> aa <u>uuu</u> c <u>g</u> A <u>u</u> .....                                                                                                        | 1  | 1 | S04 |
| .....uu <u>u</u> ccgagga <u>aa</u> aga <u>aa</u> uu <u>u</u> cc <u>g</u> .....                                                                                                      | 1  | 0 | S04 |
| .....agga <u>aa</u> gaagG <u>aa</u> uu <u>u</u> ccgagga <u>u</u> .....                                                                                                              | 1  | 1 | S04 |

Provisional ID : chrC06\_2010564  
 Score total : 0  
 Score for star read(s) : -1.3  
 Score for read counts : 0  
 Score for mfe : 1.2  
 Score for randfold : 0  
 Score for cons. seed :  
 Total read count : 46  
 Mature read count : 46  
 Loop read count : 0  
 Star read count : 0

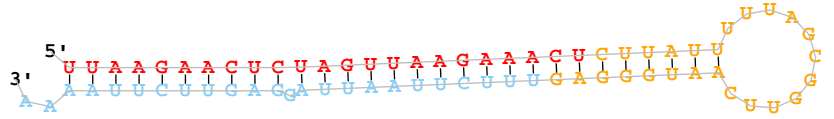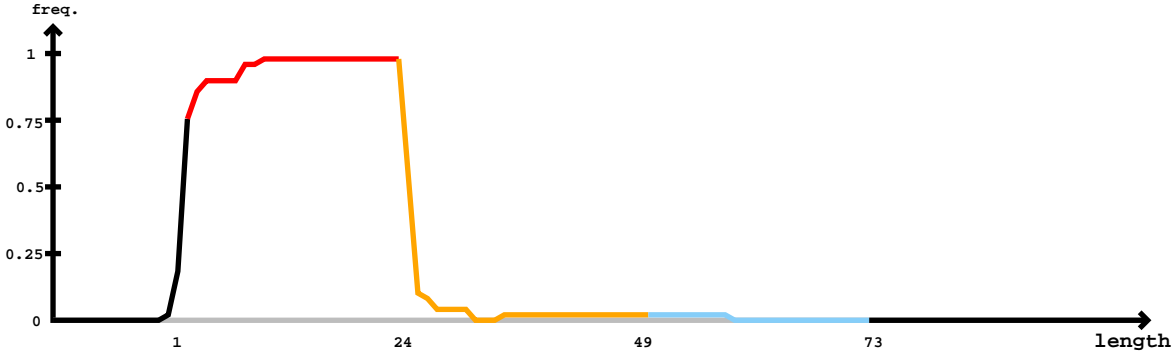

**Mature**

**Star**

| 5' -                                                                                             |  | -3'   | exp |  |        |
|--------------------------------------------------------------------------------------------------|--|-------|-----|--|--------|
| . . . . . (((((((((((((((((((((((((((((((((((((((((.....)))))))))))))))))))))))))))))))))))))))) |  | reads | mm  |  | sample |
| . . . . . guuaagaacucuaaguuagaacG . . . . .                                                      |  | 1     | 1   |  | S03    |
| . . . . . gCuaagaacucuaaguuagaacA . . . . .                                                      |  | 1     | 1   |  | S03    |
| . . . . . guuaagaacucuaaguuagaacA . . . . .                                                      |  | 1     | 1   |  | S03    |
| . . . . . guuaagaacucuaaguuagaacA . . . . .                                                      |  | 1     | 0   |  | S03    |
| . . . . . uuaagaacucuaaguuagaacG . . . . .                                                       |  | 1     | 1   |  | S03    |
| . . . . . uuaagaacucuaaguuagaacA . . . . .                                                       |  | 7     | 0   |  | S03    |
| . . . . . uuaagaacucuaaguuagaacC . . . . .                                                       |  | 2     | 1   |  | S03    |
| . . . . . uaagaacucuaaguuagaacA . . . . .                                                        |  | 2     | 0   |  | S03    |
| . . . . . uaagaacucuaaguuagaacC . . . . .                                                        |  | 1     | 0   |  | S03    |
| . . . . . aagaacucuaaguuagaacA . . . . .                                                         |  | 1     | 0   |  | S03    |
| . . . . . acucuaaguuagaacucuu . . . . .                                                          |  | 1     | 0   |  | S03    |
| . . . . . acucuaaguuagaacucuuuuu . . . . .                                                       |  | 1     | 0   |  | S03    |
| . . . . . gguuaagaacucuaaguuagaacA . . . . .                                                     |  | 1     | 0   |  | S04    |
| . . . . . guuaagaacucuaaguuagaacA . . . . .                                                      |  | 1     | 1   |  | S04    |
| . . . . . guuaagaacucuaaguuagaacC . . . . .                                                      |  | 1     | 1   |  | S04    |
| . . . . . guuaagaacucuaaguuagaacA . . . . .                                                      |  | 2     | 0   |  | S04    |
| . . . . . uuaGaacucuaaguuagaacA . . . . .                                                        |  | 1     | 1   |  | S04    |
| . . . . . uuaagaacucuaaguuagaacA . . . . .                                                       |  | 16    | 0   |  | S04    |
| . . . . . uuaagaacucuaaguuagaacC . . . . .                                                       |  | 1     | 0   |  | S04    |
| . . . . . uaagaacucuaaguuagaacA . . . . .                                                        |  | 2     | 0   |  | S04    |
| . . . . . UagaacucuaaguuagaacA . . . . .                                                         |  | 1     | 1   |  | S04    |
| . . . . . acucuaaguuagaacucua . . . . .                                                          |  | 1     | 1   |  | S04    |
| . . . . . ucuagaaguuagaacucuuuuu . . . . .                                                       |  | 1     | 0   |  | S04    |
| . . . . . gcgguucaaugggaguucuuuu . . . . .                                                       |  | 1     | 0   |  | S04    |





Mature

Star

| Sequence                                                                                                            | Mature | Star | Category |
|---------------------------------------------------------------------------------------------------------------------|--------|------|----------|
| uagguugagguucuuagcuuaauaacauacgggucucuuaacuuuuuaacuaaaaaaacuaaaagacggucucuuaagcuuuuuuaguuuaaagcuaagagaccguauuuuauuu |        |      |          |
| .....uacgggucucuuaacuuuuuaacUG.....                                                                                 | 4      | 1    | S04      |
| .....uacgggucucuuaacuuuuuaacuaa.....                                                                                | 1      | 0    | S04      |
| .....acgggucucuuaacuuuuuG.....                                                                                      | 1      | 1    | S04      |
| .....acgggucucuuaacuuuuuac.....                                                                                     | 2      | 0    | S04      |
| .....acgggucucuuaacuuuuuacu.....                                                                                    | 2      | 0    | S04      |
| .....acgggucucuuaacuuuuuaacuaa.....                                                                                 | 2      | 0    | S04      |
| .....acgggucucuuaacuuCuaacuaaaa.....                                                                                | 2      | 1    | S04      |
| .....acgggucucuuaacuuuuuaacuaaG.....                                                                                | 1      | 1    | S04      |
| .....acgggucucCuaacuuuuuaacuaaaa.....                                                                               | 1      | 1    | S04      |
| .....acgggucucuuaacuuuuuUcuaaaa.....                                                                                | 1      | 1    | S04      |
| .....acgggucucuuaacuuuuuaacuaGa.....                                                                                | 1      | 1    | S04      |
| .....acgggucucuuaacuuuuuaacuaaaa.....                                                                               | 27     | 0    | S04      |
| .....acgggucucuuaacuuuuuaacuaaaaa.....                                                                              | 1      | 0    | S04      |
| .....cgggucucuuaacuuuuuacu.....                                                                                     | 2      | 0    | S04      |
| .....cgggucucuuaacuuuuuacC.....                                                                                     | 1      | 1    | S04      |
| .....cgggucucuuaacuuuuuaacuaa.....                                                                                  | 1      | 0    | S04      |
| .....cgggucucuuaacuuuuuaacuaaaa.....                                                                                | 2      | 0    | S04      |
| .....gucucuuaacuuuuuaacuaaCaaa.....                                                                                 | 1      | 1    | S04      |
| .....uaacuuuuuaacuaaaaaacu.....                                                                                     | 1      | 0    | S04      |
| .....aaaaacuaaaagacggucucuuaagc.....                                                                                | 1      | 0    | S04      |
| .....aaagacggucucuuaagcuuuuuuag.....                                                                                | 2      | 0    | S04      |
| .....aagacggucucuuaagcuuuuuuag.....                                                                                 | 1      | 0    | S04      |
| .....aagacggucucuuaagcuuuuuuagu.....                                                                                | 1      | 0    | S04      |
| .....agacggucucuuaagcuuuuuuagu.....                                                                                 | 6      | 0    | S04      |
| .....gacggucucuuaagcuuuuuuagu.....                                                                                  | 1      | 0    | S04      |
| .....gacggucucuuaagcuuuuuuaguua.....                                                                                | 1      | 0    | S04      |
| .....acggucucuuaagcuuuuuuagu.....                                                                                   | 1      | 0    | S04      |
| .....uuuaguuuaaagcuaagagaccgC.....                                                                                  | 1      | 1    | S04      |
| .....aguuaaaagcuaagagaccg.....                                                                                      | 1      | 0    | S04      |
| .....uaaaagcuaagagaccguauu.....                                                                                     | 3      | 0    | S04      |
| .....uaaaagcuaUgagaccguauu.....                                                                                     | 1      | 1    | S04      |

Provisional ID : chrC06\_2037236  
 Score total : 0  
 Score for star read(s) : 3.9  
 Score for read counts : -4.9  
 Score for mfe : 1  
 Score for randfold : 0  
 Score for cons. seed :  
 Total read count : 2  
 Mature read count : 1  
 Loop read count : 0  
 Star read count : 1

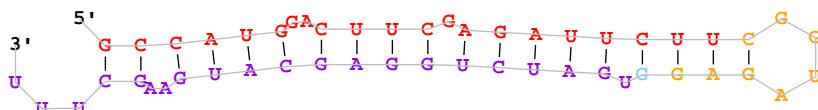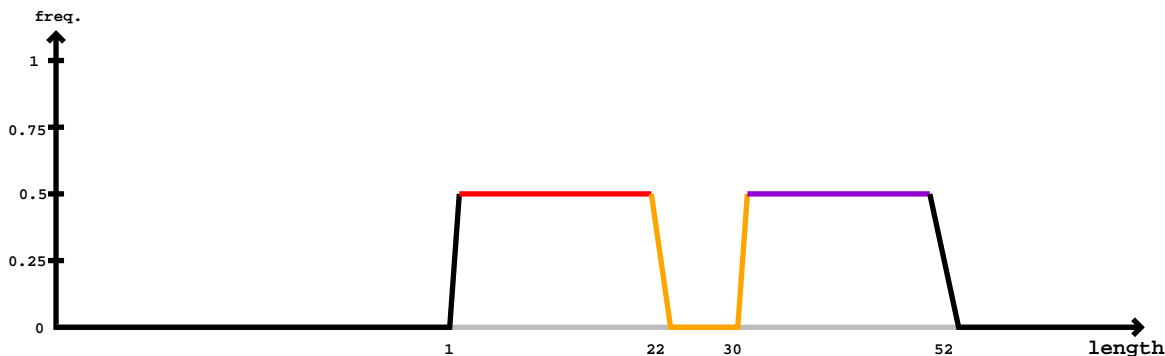

**Mature** **Star**

|      |                                                                                                                                                    |     |       |    |        |
|------|----------------------------------------------------------------------------------------------------------------------------------------------------|-----|-------|----|--------|
| 5' - | ggcaagagaagaaggcuggacaugauuuugugaggggaagagccauggacuucgagauucuu <sup>Mature</sup> cgguaagaggugaucuggagcaugaagcuuuc <u>Star</u> ccuuguuuuguggcuuuccu | -3' | obs   |    |        |
|      | ggcaagagaagaaggcuggacaugauuuugugaggggaagagccauggacuucgagauucuu <sup>Mature</sup> cgguaagaggugaucuggagcaugaagcuuuc <u>Star</u> ccuuguuuuguggcuuuccu |     | exp   |    |        |
|      | .....((((((((((.....((((((((.....((((((((.....))))))))).....)))))))).).....)))))))))..                                                             |     | reads | mm | sample |
|      | .....gccauggacuucgagauucuu.....                                                                                                                    |     | 1     | 0  | S03    |
|      | .....ugaucuggagcaugaagcuu.....                                                                                                                     |     | 1     | 0  | S03    |

Provisional ID : chrC06\_2050529  
 Score total : 0  
 Score for star read(s) : 3.9  
 Score for read counts : -4.4  
 Score for mfe : 0.5  
 Score for randfold : 0  
 Score for cons. seed :  
 Total read count : 3  
 Mature read count : 2  
 Loop read count : 0  
 Star read count : 1

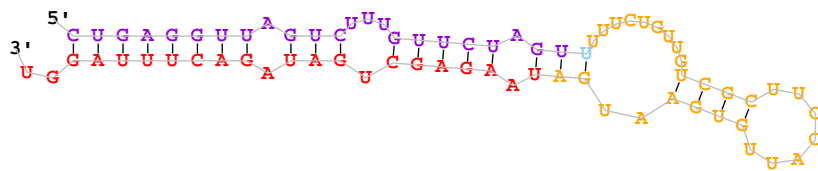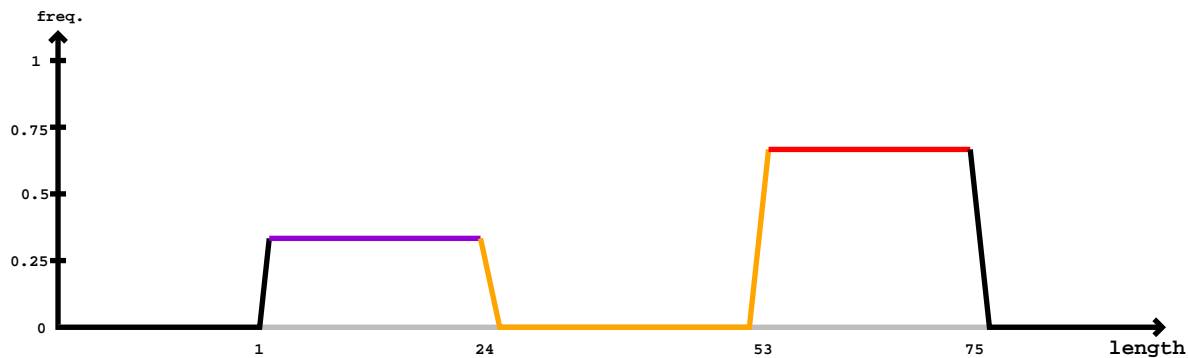

Star

Mature

| 5'                   | Star                    | Mature                                               | -3'                | obs | exp | reads | mm | sample |
|----------------------|-------------------------|------------------------------------------------------|--------------------|-----|-----|-------|----|--------|
| cgaucuaaaagcuaaaggac | cugagguuagucuuuguucuagu | uuuucuguugucgcuuccauugugaaugaaagagcugauagacuuuagguuu | uacauugcuuaacgaggc |     |     | 1     | 0  | S03    |
| .....                | .....                   | .....                                                | .....              |     |     | 1     | 0  | S04    |
| .....                | .....                   | .....                                                | .....              |     |     | 1     | 1  | S04    |



Star

Mature

| Sequence                                                                                                         | Star | Mature | Category |
|------------------------------------------------------------------------------------------------------------------|------|--------|----------|
| cguaaaagagagcaaaaggaguuuuuucugaaucCGGuaugagCGuuacaacaagguagaagccuuggucaCGagagcugucggcgagauuccuaguucuaacaaccuaaga | 19   | 0      | S03      |
| .....agcugucggcgagauuccuagu.....                                                                                 | 3    | 0      | S03      |
| .....agcugucggcgagauuccuagu.....                                                                                 | 1    | 1      | S03      |
| .....agcugucggcgagauuccuaguuc.....                                                                               | 4    | 0      | S03      |
| .....gcugucggcgagauuccu.....                                                                                     | 6    | 0      | S03      |
| .....gcugucggcgagauuccua.....                                                                                    | 6    | 0      | S03      |
| .....gcugucggcgagauuccuagu.....                                                                                  | 2    | 0      | S03      |
| .....gcugucggcgagauuccuagu.....                                                                                  | 6    | 0      | S03      |
| .....gcugucggcgagauuccuaguuc.....                                                                                | 1    | 0      | S03      |
| .....gcugucggcgagauuccuaguuc.....                                                                                | 3    | 0      | S03      |
| .....gcugucggcgagauuccuaguucG.....                                                                               | 1    | 1      | S03      |
| .....gcugucggcgagauuccuaguucC.....                                                                               | 2    | 1      | S03      |
| .....gcugucggcgagauuccuaguucG.....                                                                               | 1    | 1      | S03      |
| .....cugucggcgagauuccua.....                                                                                     | 1    | 0      | S03      |
| .....cugucggcgagauuccuagu.....                                                                                   | 1    | 0      | S03      |
| .....cugucggcgagauuccuagu.....                                                                                   | 4    | 0      | S03      |
| .....cugucggcgagauuccuaguuc.....                                                                                 | 2    | 0      | S03      |
| .....cugucggcgagauuccuaguucC.....                                                                                | 1    | 1      | S03      |
| .....cugucggcgagauuccuaguuc.....                                                                                 | 1    | 0      | S03      |
| .....cugucggcgagauuccuaguucG.....                                                                                | 1    | 1      | S03      |
| .....Ugucggcgagauuccuaguucua.....                                                                                | 1    | 1      | S03      |
| .....cugucggcgagauuccuaguucua.....                                                                               | 5    | 0      | S03      |
| .....ugucggcgagauuccuaguuc.....                                                                                  | 1    | 0      | S03      |
| .....ugucggcgagauuccuaguucG.....                                                                                 | 1    | 1      | S03      |
| .....ugucggcgagauuccuaguucua.....                                                                                | 1    | 0      | S03      |
| .....ucggcgagauuccuaguuc.....                                                                                    | 1    | 0      | S03      |
| .....gcgagauuccuaguucuaacaac.....                                                                                | 1    | 0      | S03      |
| .....aaaggaguuuuuucugaaucCGA.....                                                                                | 1    | 1      | S04      |
| .....aaaggaguuuuuucugaaucCGC.....                                                                                | 1    | 1      | S04      |
| .....guuuuucugaaucCGuauaga.....                                                                                  | 1    | 0      | S04      |
| .....uuuucugaaucCGuauagagc.....                                                                                  | 1    | 1      | S04      |
| .....guagagCGuuacaacaagguaga.....                                                                                | 1    | 0      | S04      |
| .....augagCGuuacaacaagguaga.....                                                                                 | 1    | 0      | S04      |
| .....augagCGuuacaacaagguagGag.....                                                                               | 1    | 1      | S04      |
| .....augagCGuuacaacaagguagaag.....                                                                               | 2    | 0      | S04      |
| .....CGuuacaacaagguagaagcc.....                                                                                  | 1    | 0      | S04      |
| .....acgagagcugucggcgagauuccu.....                                                                               | 1    | 0      | S04      |
| .....cgagagcugucggcgagauuccu.....                                                                                | 1    | 0      | S04      |
| .....gagagcugucggcgagauuccua.....                                                                                | 5    | 0      | S04      |
| .....gagagcugucggcgagauuccuG.....                                                                                | 1    | 1      | S04      |
| .....gagagcugucggcgagauuccuag.....                                                                               | 2    | 0      | S04      |
| .....agagcugucggcgagauuccu.....                                                                                  | 3    | 0      | S04      |
| .....agagcugucggcgagauuccua.....                                                                                 | 2    | 0      | S04      |
| .....agagcugucggcgagauuccuagu.....                                                                               | 16   | 0      | S04      |
| .....Ugagcugucggcgagauuccuagu.....                                                                               | 1    | 1      | S04      |
| .....gagcugucggcgagauuccu.....                                                                                   | 1    | 0      | S04      |
| .....gagcugucggcgagauuccua.....                                                                                  | 1    | 0      | S04      |
| .....gagcugucggcgagauuccuagu.....                                                                                | 2    | 0      | S04      |
| .....agcugucggcgagauuccuag.....                                                                                  | 1    | 0      | S04      |
| .....agcugucggcgagauuccuagu.....                                                                                 | 2    | 0      | S04      |
| .....agcugucggcgagauuccuaguuc.....                                                                               | 4    | 0      | S04      |
| .....agcugucggcgagauuccuagLuc.....                                                                               | 1    | 1      | S04      |
| .....agcugucggcgagauuccuaguucC.....                                                                              | 1    | 1      | S04      |
| .....agcugucggcgagauuccuaguuc.....                                                                               | 1    | 0      | S04      |
| .....gcugucggcgagauuccu.....                                                                                     | 2    | 0      | S04      |
| .....gcugucggcgagauuccua.....                                                                                    | 1    | 0      | S04      |
| .....gcugucggcgagauuccuagu.....                                                                                  | 3    | 0      | S04      |
| .....gcugucggcgagauuccuagu.....                                                                                  | 2    | 0      | S04      |
| .....gcugucggcgagauuccuaguuc.....                                                                                | 1    | 0      | S04      |
| .....gcugucggcgagauuccuaguuc.....                                                                                | 5    | 0      | S04      |
| .....cugucggcgagauuccua.....                                                                                     | 1    | 0      | S04      |
| .....cugucggcgagauuccuagu.....                                                                                   | 1    | 0      | S04      |
| .....cugucggcgagauuccuaguuc.....                                                                                 | 1    | 0      | S04      |
| .....cugucggcgagauuccuaguucua.....                                                                               | 1    | 0      | S04      |
| .....ugucggcgagauuccuag.....                                                                                     | 1    | 0      | S04      |
| .....ugucggcgagauuccuaguuc.....                                                                                  | 1    | 0      | S04      |
| .....ucggcgagauuccuaguuc.....                                                                                    | 1    | 0      | S04      |

Provisional ID : chrC06\_2065925  
 Score total : 857.2  
 Score for star read(s) : 3.9  
 Score for read counts : 852  
 Score for mfe : 1.3  
 Score for randfold : 0  
 Score for cons. seed :  
 Total read count : 1683  
 Mature read count : 1495  
 Loop read count : 33  
 Star read count : 155

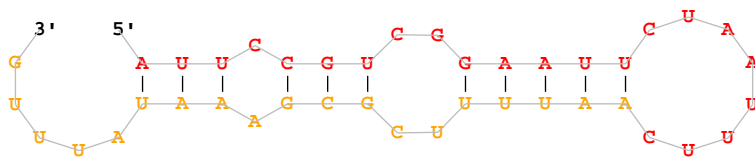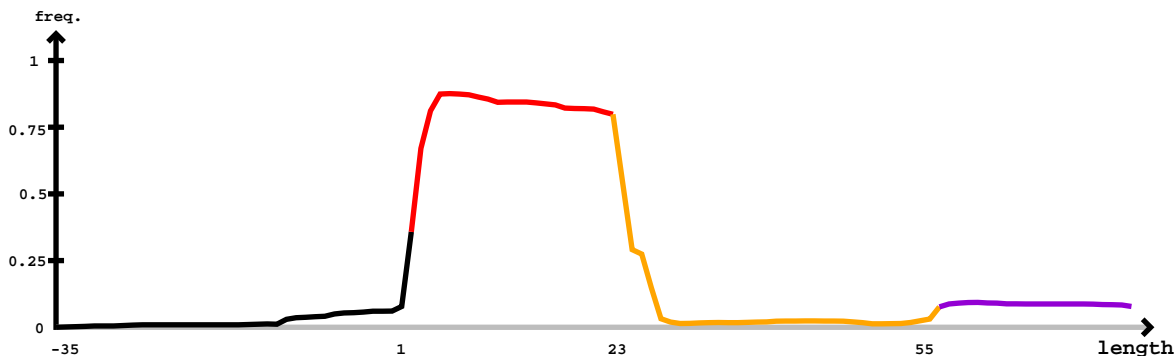

**Mature**

**Star**

| 5'                                                                                                                             | reads | mm | sample |
|--------------------------------------------------------------------------------------------------------------------------------|-------|----|--------|
| uaaaaccuaggguccgacggaauuaucgucgga <u>auuccgucggaauucuaauuucaauuuucgcaaaauuuugcccgguaaaauga</u> aaauauuccgaggaaa <u>uuccgac</u> | 2     | 0  | S03    |
| uaaaaccuaggguccgacggaauuaucgucgga <u>auuccgucggaauucuaauuucaauuuucgcaaaauuuugcccgguaaaauga</u> aaauauuccgaggaaa <u>uuccgac</u> | 1     | 1  | S03    |
| uaaaaccuaggguccgacgga <u>U</u> .....                                                                                           | 1     | 1  | S03    |
| ..... <u>cuaggguccgacggaauCauc</u> .....                                                                                       | 1     | 1  | S03    |
| ..... <u>cuaggguccgacggaauuaucc</u> .....                                                                                      | 1     | 0  | S03    |
| ..... <u>cuaggguccgacggaauuauccg</u> .....                                                                                     | 1     | 0  | S03    |
| ..... <u>uaggguccgacggaauCauc</u> .....                                                                                        | 1     | 1  | S03    |
| ..... <u>uaggguccgacggaauuaucc</u> .....                                                                                       | 1     | 0  | S03    |
| ..... <u>gauaAuaucgucggaauuc</u> .....                                                                                         | 1     | 1  | S03    |
| ..... <u>auuuauucgucggaauuc</u> .....                                                                                          | 1     | 0  | S03    |
| ..... <u>auuauucgucggaauucc</u> .....                                                                                          | 1     | 0  | S03    |
| ..... <u>auuauucgucggaauuccg</u> .....                                                                                         | 1     | 0  | S03    |
| ..... <u>auuauucgucggaauuccgu</u> .....                                                                                        | 7     | 0  | S03    |
| ..... <u>auuauucgucggaauuccguc</u> .....                                                                                       | 2     | 0  | S03    |
| ..... <u>auuauucgucggaauuccgucC</u> .....                                                                                      | 2     | 1  | S03    |
| ..... <u>auuauucgucggaauuccgucU</u> .....                                                                                      | 2     | 1  | S03    |
| ..... <u>uuauucgucggaauuccg</u> .....                                                                                          | 1     | 0  | S03    |
| ..... <u>uuauucgucggaauuccA</u> .....                                                                                          | 1     | 1  | S03    |
| ..... <u>uuauucgucggaauuccgu</u> .....                                                                                         | 2     | 0  | S03    |
| ..... <u>uuauucgucAgaauuccguc</u> .....                                                                                        | 1     | 1  | S03    |
| ..... <u>uuauucgucggaauuccguA</u> .....                                                                                        | 1     | 1  | S03    |
| ..... <u>uuauucgucggaauuccgucC</u> .....                                                                                       | 1     | 1  | S03    |
| ..... <u>uauccgucggaauuccgu</u> .....                                                                                          | 1     | 0  | S03    |
| ..... <u>aucgucUgaauuccgucggaauu</u> .....                                                                                     | 2     | 1  | S03    |
| ..... <u>aucgucggaauuccAucggaauu</u> .....                                                                                     | 1     | 1  | S03    |
| ..... <u>uccgucggaauuccAucggaauu</u> .....                                                                                     | 1     | 1  | S03    |
| ..... <u>cgucUgaauuccgucggaauu</u> .....                                                                                       | 1     | 1  | S03    |
| ..... <u>cGucggaauuccgucggaauucU</u> .....                                                                                     | 1     | 1  | S03    |
| ..... <u>ccgucggaauuccgucggaauucU</u> .....                                                                                    | 1     | 0  | S03    |
| ..... <u>ccgucggaauuccgucggaauucG</u> .....                                                                                    | 1     | 1  | S03    |
| ..... <u>cgucggaauuccgucggaauu</u> .....                                                                                       | 1     | 0  | S03    |
| ..... <u>gucggaauuccgucggaau</u> .....                                                                                         | 1     | 0  | S03    |
| ..... <u>gucggaauuccgucggaauucua</u> .....                                                                                     | 2     | 0  | S03    |





Mature

Star

| Sequence                                                                                                             | Mature Count | Star Count | Category |
|----------------------------------------------------------------------------------------------------------------------|--------------|------------|----------|
| uaaaaccuaggguccgacggauuuuuccgucggaauccgucggaauccgucggaauucaaauucaaauuucgucggaauuuugcccgguaaaugaaauuuuccgaggaaauccgac | 1            | 1          | S03      |
| .....uuccgucggaGuucuaauuucaau.....                                                                                   | 1            | 1          | S03      |
| .....uuccgucggaauuAuaauuucaau.....                                                                                   | 1            | 1          | S03      |
| .....uuccgucggaauucuaauuucaaC.....                                                                                   | 11           | 1          | S03      |
| .....uuccgucgAaaauucuaauuucaau.....                                                                                  | 2            | 1          | S03      |
| .....uuccgucggaauucuaauuucaau.....                                                                                   | 1            | 1          | S03      |
| .....uuccgucggaauucuaauuucaau.....                                                                                   | 2            | 1          | S03      |
| .....uuccgucggaauucuaauuucaGu.....                                                                                   | 1            | 1          | S03      |
| .....uuccgucggaauucuaauuucaaG.....                                                                                   | 1            | 1          | S03      |
| .....uuccgucggaauucuaauuucaaCu.....                                                                                  | 1            | 1          | S03      |
| .....uuccgucggaauucuaCuuucaau.....                                                                                   | 1            | 1          | S03      |
| .....uuccgucggaauucuaauuucaauu.....                                                                                  | 1            | 1          | S03      |
| .....uuccgucggaauucuaauuucaaA.....                                                                                   | 1            | 1          | S03      |
| .....uuccgucggaauucuaauuucaau.....                                                                                   | 7            | 0          | S03      |
| .....uuccgucggaauucuaauuucaaG.....                                                                                   | 1            | 1          | S03      |
| .....uuccgucggaauucuaauuucaaC.....                                                                                   | 1            | 1          | S03      |
| .....uuccgucggaauucuaauuucaauuu.....                                                                                 | 5            | 0          | S03      |
| .....uuccgucggaauucuaauuucaauuuu.....                                                                                | 1            | 0          | S03      |
| .....uuccgucggaauucuaauuu.....                                                                                       | 1            | 0          | S03      |
| .....uuccgucggaauucuaauuu.....                                                                                       | 6            | 0          | S03      |
| .....uuccgucggaauucuaauuuca.....                                                                                     | 28           | 0          | S03      |
| .....uuccgucggaauucuaGuuuca.....                                                                                     | 1            | 1          | S03      |
| .....uuccgucggaauucuaauuuca.....                                                                                     | 1            | 1          | S03      |
| .....uuccgucggaCuucuaauuuca.....                                                                                     | 1            | 1          | S03      |
| .....uuccgucggaauucuaauuucaa.....                                                                                    | 1            | 0          | S03      |
| .....uuccgucggaauucuaauuucaa.....                                                                                    | 1            | 1          | S03      |
| .....uuccgucggaauucuaauuucaC.....                                                                                    | 1            | 1          | S03      |
| .....uuccgucggaauucuaauuucaau.....                                                                                   | 3            | 0          | S03      |
| .....uuccgucggaauucuaauuucaaA.....                                                                                   | 1            | 1          | S03      |
| .....uuccgucggaauucuaauuucaauu.....                                                                                  | 2            | 1          | S03      |
| .....uuccgucggaCucuaauuucaauu.....                                                                                   | 1            | 1          | S03      |
| .....uuccgucggaauucuaauuucaaCu.....                                                                                  | 2            | 1          | S03      |
| .....uuccgucggaauucuaauuucaau.....                                                                                   | 1            | 1          | S03      |
| .....uuccgucggaauucuaauuuGcaau.....                                                                                  | 1            | 1          | S03      |
| .....uuccgucggaauucuaauuucaauG.....                                                                                  | 2            | 1          | S03      |
| .....uuccgucggaauucuaauuucaauu.....                                                                                  | 1            | 1          | S03      |
| .....uuccgucggaauucuaauuucaauu.....                                                                                  | 1            | 1          | S03      |
| .....uuccgucggaauucuaauuucaauu.....                                                                                  | 61           | 0          | S03      |
| .....uuccgucggaauucuaauuucaauC.....                                                                                  | 3            | 1          | S03      |
| .....uuccgucggaauucuaauuucaauu.....                                                                                  | 1            | 1          | S03      |
| .....uuccgucggaauucuaauuucaauu.....                                                                                  | 1            | 1          | S03      |
| .....uuccgucggaauucuaauuucaauuu.....                                                                                 | 1            | 0          | S03      |
| .....uuccgucggaauucuaauuucaauuuu.....                                                                                | 2            | 0          | S03      |
| .....ccgucggaGuucuaauuu.....                                                                                         | 1            | 1          | S03      |
| .....ccgucggaauucuaauuuu.....                                                                                        | 3            | 0          | S03      |
| .....ccgucggaauucuaauuuca.....                                                                                       | 15           | 0          | S03      |
| .....ccgucggaCucuaauuuca.....                                                                                        | 1            | 1          | S03      |
| .....ccgucggaauucuaauuuuCG.....                                                                                      | 1            | 1          | S03      |
| .....ccgucggaauucuaauuucaau.....                                                                                     | 2            | 0          | S03      |
| .....cAgucggaauucuaauuucaau.....                                                                                     | 1            | 1          | S03      |
| .....ccgucggaauucuaauuucaauG.....                                                                                    | 1            | 1          | S03      |
| .....ccgucggaauucuaauuucaauu.....                                                                                    | 18           | 0          | S03      |
| .....ccgucggaauucuaauuucaauu.....                                                                                    | 1            | 1          | S03      |
| .....Ncgucggaauucuaauuucaauu.....                                                                                    | 1            | 1          | S03      |
| .....ccgucggaauucuaauuucaauC.....                                                                                    | 1            | 1          | S03      |
| .....ccgucggaauAcuaauuucaauuu.....                                                                                   | 1            | 1          | S03      |
| .....ccgucggaauucuaauuucaauuu.....                                                                                   | 9            | 0          | S03      |
| .....ccgucggaauucuaauuucaauGu.....                                                                                   | 1            | 1          | S03      |
| .....ccgucggaauucuaauuucaauuuu.....                                                                                  | 1            | 1          | S03      |
| .....ccgucggaauucuaauuucaauuuu.....                                                                                  | 2            | 0          | S03      |
| .....auucuaauuucaauuuuccgga.....                                                                                     | 1            | 0          | S03      |
| .....cauuuuuccggaauuuugcccg.....                                                                                     | 1            | 0          | S03      |
| .....aauuuuuccggaauuuugcU.....                                                                                       | 1            | 1          | S03      |
| .....aauuuuuccggaauuuugcccga.....                                                                                    | 1            | 1          | S03      |
| .....uuuuccggaauuuugcccgga.....                                                                                      | 1            | 0          | S03      |
| .....uuuccggaauuuugcccg.....                                                                                         | 1            | 0          | S03      |
| .....uuuccggaauuuugcccggu.....                                                                                       | 2            | 0          | S03      |
| .....uuuccggaauuuugcccgga.....                                                                                       | 1            | 0          | S03      |
| .....uuuccggaauuuugcccgguG.....                                                                                      | 1            | 1          | S03      |
| .....uuccggaauuuugcccgga.....                                                                                        | 1            | 0          | S03      |
| .....uccggaauuuugcccgga.....                                                                                         | 1            | 0          | S03      |



Mature

Star

uaaaaccuaggguccgacggauuuuuccgucggaauccgucggaauccgucggaauuucuaauuucauuuucgucggaauuuugccgguaaaugaaauuuuccgaggaaauccgac

|                               |     |   |     |
|-------------------------------|-----|---|-----|
| .auccgucggaauccgUA            | 1   | 1 | S04 |
| .uccgucggaauccgucU            | 1   | 1 | S04 |
| .uccgucggaauccAucggaauucu     | 1   | 1 | S04 |
| .ccgucggaauucUgucggaauuc      | 1   | 1 | S04 |
| .ccgucggaauuccgucggaauucA     | 2   | 1 | S04 |
| .ccgucggaauuccgucggaauucu     | 7   | 0 | S04 |
| .ccgucggaauuccgucCgaauucu     | 1   | 1 | S04 |
| .ccgucggaauuccgucAgaauucu     | 1   | 1 | S04 |
| .cgucggaauuccgucggaauuc       | 1   | 0 | S04 |
| .cgucggaauCccgucggaauucu      | 1   | 1 | S04 |
| .cgucggaauuccgucggaauucu      | 3   | 0 | S04 |
| .Ggucggaauuccgucggaauucu      | 2   | 1 | S04 |
| .gucggaauuccgucggaUu          | 1   | 1 | S04 |
| .gucggaauuccgucggaauuc        | 1   | 0 | S04 |
| .gucggaauuccgucggaauucA       | 1   | 1 | S04 |
| .gucggaauuccgucggaauucua      | 1   | 0 | S04 |
| .ucggaauuccgucggaau           | 1   | 0 | S04 |
| .cggaauuccgucggaauu           | 4   | 0 | S04 |
| .gaauuccgucggaauuAuaauuuc     | 1   | 1 | S04 |
| .aaauccgucggaauucuaauu        | 1   | 0 | S04 |
| .aaauccgucggaauucuaauuc       | 1   | 1 | S04 |
| .aaauccgucggaauucuaauuuU      | 1   | 1 | S04 |
| .aaauccgucggaauucuaauuuc      | 8   | 0 | S04 |
| .aaauccgucggaauucuaauuuca     | 2   | 0 | S04 |
| .aaauccgucggaauucuaauuuca     | 1   | 1 | S04 |
| .aaauccgucggaauucuaauuuAaa    | 1   | 1 | S04 |
| .aaauccgucggaauucuaC          | 1   | 1 | S04 |
| .aaauccgucggaauucuaA          | 1   | 1 | S04 |
| .aaauccgucggaauucuaauu        | 1   | 0 | S04 |
| .aaauccgucggaauucuaauuuuc     | 1   | 1 | S04 |
| .aaauccgucggaauucuaauuuuc     | 2   | 1 | S04 |
| .aaauccgucggaauucuaauuuuc     | 2   | 1 | S04 |
| .aaauccgucggaauucuaauuuuc     | 3   | 1 | S04 |
| .aaauccgucggaauucuaauuuuc     | 5   | 1 | S04 |
| .aaauccgucggaauucuaauuuuc     | 133 | 0 | S04 |
| .Uuuccgucggaauucuaauuuuc      | 4   | 1 | S04 |
| .Guuccgucggaauucuaauuuuc      | 2   | 1 | S04 |
| .Nuuccgucggaauucuaauuuuc      | 1   | 1 | S04 |
| .aaauccgucggaauucuaauuuU      | 3   | 1 | S04 |
| .aaauccgucggaauucuaauuuuc     | 1   | 1 | S04 |
| .aaauccgucggaauucuaauuuuc     | 2   | 1 | S04 |
| .aaauccgucggaauucuaauuuucG    | 5   | 1 | S04 |
| .Uuuccgucggaauucuaauuuuca     | 1   | 1 | S04 |
| .aaauccgucggaauucuaauuuuca    | 1   | 1 | S04 |
| .aaauccgucggaauucuaauuuuca    | 21  | 0 | S04 |
| .aaauccgucggaauucuaauuuuca    | 1   | 1 | S04 |
| .aaauccgucggaauucuaauuuucC    | 4   | 1 | S04 |
| .aaauccgucggaauucuaauuuucU    | 5   | 1 | S04 |
| .aaauccgucggaauucuaauuuucaU   | 1   | 1 | S04 |
| .aaauccgucggaauucuaauuuuca    | 6   | 0 | S04 |
| .aaauccgucggaauucuaauuuucaau  | 1   | 0 | S04 |
| .aaauccgucggaauucuaauuuucaA   | 1   | 1 | S04 |
| .aaauccgucggaauucuaauuuucaauu | 2   | 0 | S04 |
| .uuuccgucggaauucuaauu         | 6   | 0 | S04 |
| .uuuccgucggaauucuaauuu        | 3   | 0 | S04 |
| .Nuuccgucggaauucuaauuuuc      | 1   | 1 | S04 |
| .uuuccgucggaauucuaauuuuc      | 1   | 1 | S04 |
| .uuuccgucggaauucuaauuuuc      | 1   | 1 | S04 |
| .uuuccgucggaauucuaauuuucG     | 1   | 1 | S04 |
| .uuuccgucggaauucuaauuuuc      | 70  | 0 | S04 |
| .uuuccgucggaauucuaauuuuc      | 1   | 1 | S04 |
| .uAuccgucggaauucuaauuuuc      | 1   | 1 | S04 |
| .uuuccgucggaauucuaauuuU       | 3   | 1 | S04 |
| .uuuccgucggaauucuaauuuuc      | 3   | 1 | S04 |
| .uuuccgucggaauucuaauuuuca     | 1   | 1 | S04 |
| .uuuccgucggaauucuaUuuuca      | 1   | 1 | S04 |
| .uuuccgucggaauucuaauuuucC     | 2   | 1 | S04 |
| .uuuccgucggaauucuaauCuca      | 1   | 1 | S04 |













Provisional ID : chrC07\_2115334  
 Score total : 4.2  
 Score for star read(s) : 3.9  
 Score for read counts : 0.1  
 Score for mfe : 0.2  
 Score for randfold : 0  
 Score for cons. seed :  
 Total read count : 12  
 Mature read count : 11  
 Loop read count : 0  
 Star read count : 1

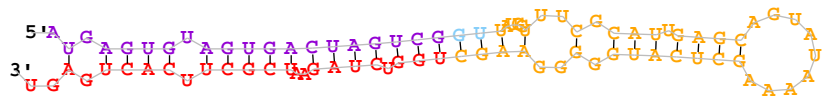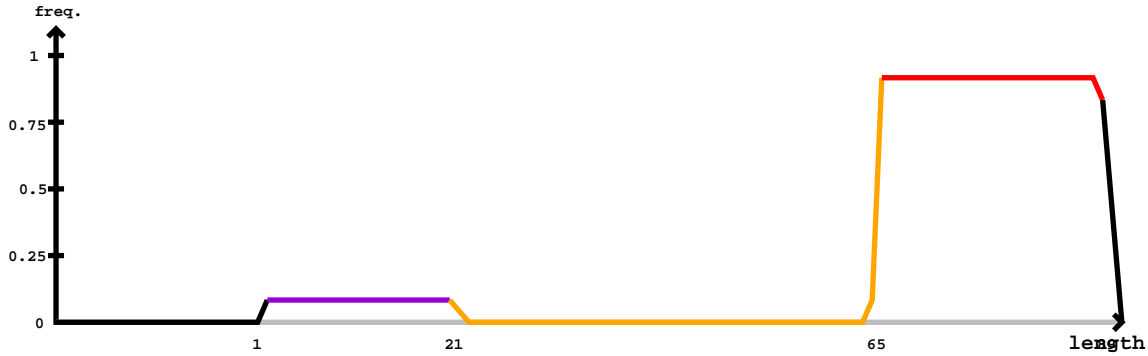

**Star**

**Mature**

|                                                                                                        |       |     |        |
|--------------------------------------------------------------------------------------------------------|-------|-----|--------|
| 5' - ccuuaauagcuagucaagaaaugaguguagugacuagucgguuauucguuucgcauugagcagauuaaaagcucaugggggaagcuggucuaagaau | -3'   | obs |        |
| ccuuaauagcuagucaagaaaugaguguagugacuagucgguuauucguuucgcauugagcagauuaaaagcucaugggggaagcuggucuaagaau      | exp   |     |        |
| .....(((((.....)))))).....                                                                             | reads | mm  | sample |
| .....uggucuaagaau                                                                                      | 3     | 0   | S03    |
| .....uggucuaagaau                                                                                      | 1     | 1   | S03    |
| .....uggucuaagaau                                                                                      | 1     | 1   | S03    |
| .....augaguguagugacuagucA.....                                                                         | 1     | 1   | S04    |
| .....cuggucuaagaau                                                                                     | 1     | 0   | S04    |
| .....uggucuaagaau                                                                                      | 5     | 0   | S04    |

Provisional ID : chrC07\_2119910  
 Score total : 0  
 Score for star read(s) : 3.9  
 Score for read counts : -4.4  
 Score for mfe : 0.5  
 Score for randfold : 0  
 Score for cons. seed :  
 Total read count : 3  
 Mature read count : 2  
 Loop read count : 0  
 Star read count : 1

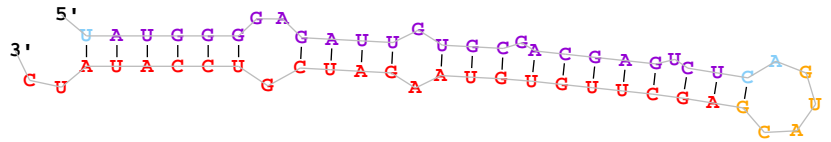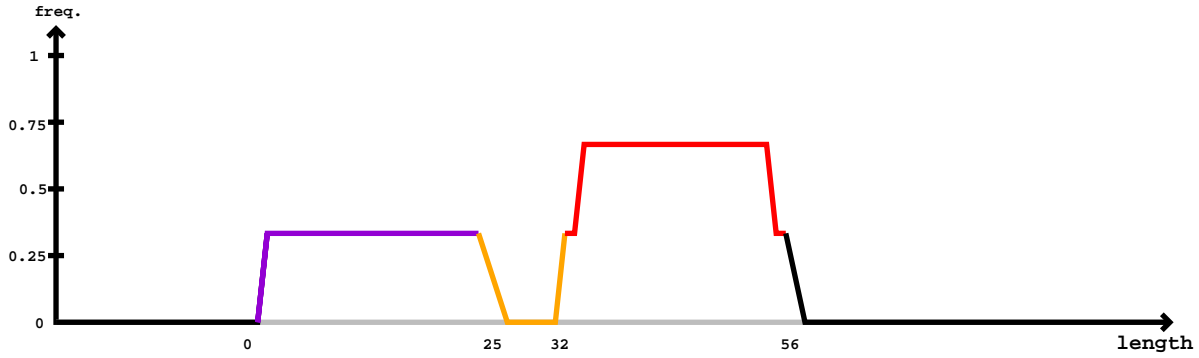

**Star** **Mature**

|      |                                                                                                       |                              |                        |           |                                        |     |       |    |        |
|------|-------------------------------------------------------------------------------------------------------|------------------------------|------------------------|-----------|----------------------------------------|-----|-------|----|--------|
| 5' - | gucaccagagcuuagaucg                                                                                   | auggggagauugugcgacgagucuc    | aguacgagcuuguguaagaucg | uccauuucg | aaaaaugacagagauuaagaguuuuugaagcagaaagu | -3' | obs   |    |        |
|      | gucaccagagcuuagaucg                                                                                   | auggggagauugugcgacgagucuc    | aguacgagcuuguguaagaucg | uccauuucg | aaaaaugacagagauuaagaguuuuugaagcagaaagu |     | exp   |    |        |
|      | .....(((((((.....(((((((.....(((((((.....)))))))))))))))))))))))))))))))))))))))))))))))))))))))))))) |                              |                        |           |                                        |     | reads | mm | sample |
|      | .....                                                                                                 | .....cuuguguaagaucg          | uccauu                 | .....     |                                        |     | 1     | 0  | S03    |
|      | .....                                                                                                 | .....auggggagauugugcgacgaguc | .....                  |           |                                        |     | 1     | 0  | S04    |
|      | .....                                                                                                 | .....agcuuguguaagaucg        | uccauu                 | .....     |                                        |     | 1     | 1  | S04    |











**Star**

**Mature**

cuuggaaugcacuuuuuccucuuuuuuuaagucaacacacacagaaacacaguauucugacgggcauucugacaaaaugagauccucggauuuccaacuuucu











Provisional ID : chrC07\_2173958  
 Score total : 0.4  
 Score for star read(s) : -1.3  
 Score for read counts : 0  
 Score for mfe : 1.7  
 Score for randfold : 0  
 Score for cons. seed :  
 Total read count : 33  
 Mature read count : 29  
 Loop read count : 1  
 Star read count : 3

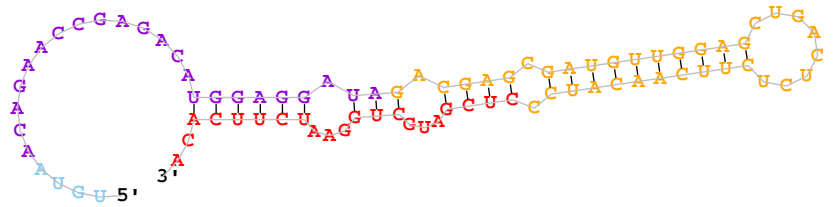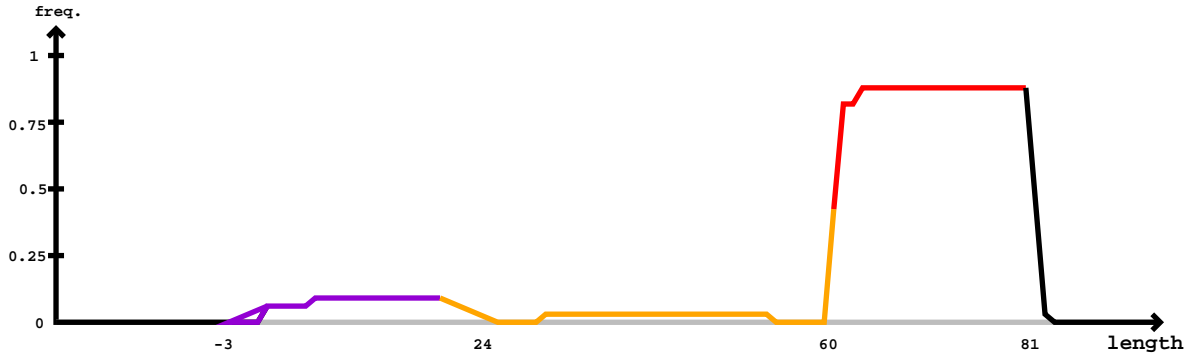

**Star**

**Mature**

| 5' -               | Star                       | Mature                                                                 | -3' | obs | exp | reads | mm | sample |
|--------------------|----------------------------|------------------------------------------------------------------------|-----|-----|-----|-------|----|--------|
| gcucuuguugguguugua | acagaaccgagacauggaggaua    | gacgagcgauguuggagcugacucucucaacaauccucgaucuggaauucacacacaccaccagagau   |     |     |     |       |    |        |
| gcucuuguugguguug   | uguacagaaccgagacauggaggaua | uagacgagcgauguuggagcugacucucucaacaauccucgaucuggaauucacacacaccaccagagau |     |     |     |       |    |        |
|                    | .....                      | .....                                                                  |     |     |     | 3     | 1  | S03    |
|                    | .....                      | .....                                                                  |     |     |     | 2     | 1  | S03    |
|                    | .....                      | .....                                                                  |     |     |     | 5     | 1  | S03    |
|                    | .....                      | .....                                                                  |     |     |     | 1     | 1  | S03    |
|                    | .....                      | .....                                                                  |     |     |     | 1     | 0  | S03    |
|                    | .....                      | .....                                                                  |     |     |     | 2     | 0  | S04    |
|                    | .....                      | .....                                                                  |     |     |     | 1     | 1  | S04    |
|                    | .....                      | .....                                                                  |     |     |     | 1     | 0  | S04    |
|                    | .....                      | .....                                                                  |     |     |     | 8     | 1  | S04    |
|                    | .....                      | .....                                                                  |     |     |     | 1     | 1  | S04    |
|                    | .....                      | .....                                                                  |     |     |     | 7     | 1  | S04    |
|                    | .....                      | .....                                                                  |     |     |     | 1     | 1  | S04    |











Provisional ID : chrC07\_2202684  
 Score total : 103.3  
 Score for star read(s) : 3.9  
 Score for read counts : 98  
 Score for mfe : 1.4  
 Score for randfold : 0  
 Score for cons. seed :  
 Total read count : 204  
 Mature read count : 202  
 Loop read count : 0  
 Star read count : 2

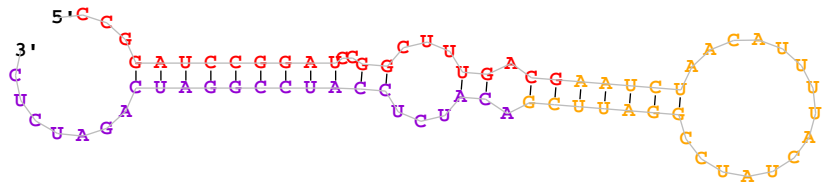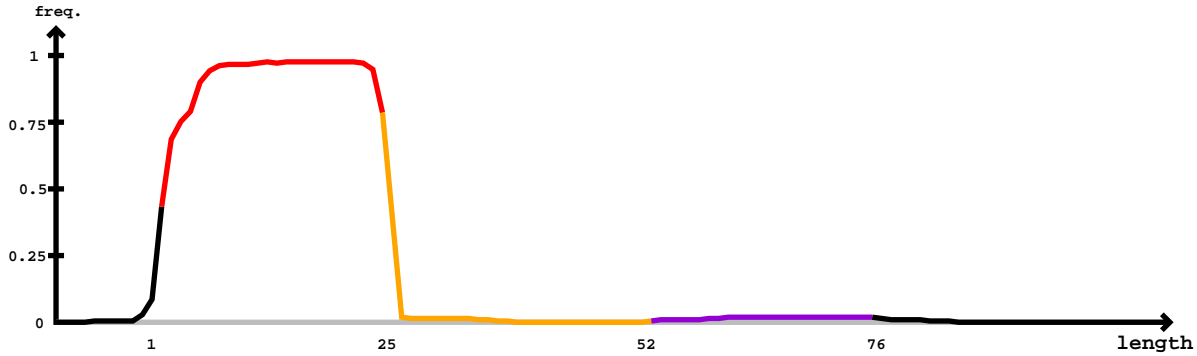

**Mature**

**Star**

| 5' -                                                                                                                                               | -3' | obs | exp | reads | mm | sample |
|----------------------------------------------------------------------------------------------------------------------------------------------------|-----|-----|-----|-------|----|--------|
| ucaagauauc <b>ccggauccggauccggcuuugacg</b> aaucuaacauuuuacuau <b>ccggauccggaucgac</b> aucucca <b>ccggaucag</b> aucucagaucgaauccggaucucggaucgaaucga |     |     |     |       |    |        |
| ucaagauauc <b>ccggauccggauccggcuuugacg</b> aaucuaacauuuuacuau <b>ccggauccggaucgac</b> aucucca <b>ccggaucag</b> aucucagaucgaauccggaucucggaucgaaucga |     |     |     |       |    |        |
| .....(((.....((((((((.....)))))))).....)))))))))).....)))))))).....)))))))).....)))))))).....)))))))).....)))))))).....                            |     |     |     | 1     | 0  | S03    |
| .....a <b>uccggauccggauccggcuuug</b> .....                                                                                                         |     |     |     | 1     | 0  | S03    |
| .....a <b>uccggauccggauccggcuuugacg</b> .....                                                                                                      |     |     |     | 8     | 0  | S03    |
| ..... <b>ccggauccggauccggcuuugac</b> .....                                                                                                         |     |     |     | 1     | 0  | S03    |
| ..... <b>ccggauccggauccggcuuugUcg</b> .....                                                                                                        |     |     |     | 1     | 1  | S03    |
| ..... <b>ccggauccggauccAgcuuugacg</b> .....                                                                                                        |     |     |     | 1     | 1  | S03    |
| ..... <b>ccggauccggauccggcuuugacU</b> .....                                                                                                        |     |     |     | 1     | 1  | S03    |
| .....a <b>uccggauccggauccggcuuugacg</b> .....                                                                                                      |     |     |     | 27    | 0  | S03    |
| ..... <b>ccggauccggGuccggcuuugacg</b> .....                                                                                                        |     |     |     | 1     | 1  | S03    |
| ..... <b>ccgCaucggauccggcuuugacg</b> .....                                                                                                         |     |     |     | 1     | 1  | S03    |
| ..... <b>ccggauccggauccggcuuugacA</b> .....                                                                                                        |     |     |     | 3     | 1  | S03    |
| ..... <b>ccggauccggauccggcuuugac</b> .....                                                                                                         |     |     |     | 6     | 0  | S03    |
| ..... <b>ccggauccggauccggcuuugacA</b> .....                                                                                                        |     |     |     | 13    | 1  | S03    |
| ..... <b>ccggauccggauccggcuuugacg</b> .....                                                                                                        |     |     |     | 7     | 0  | S03    |
| ..... <b>ccggauccggauccggcuuugacU</b> .....                                                                                                        |     |     |     | 1     | 1  | S03    |
| ..... <b>ccggauccggauccggcuuugacga</b> .....                                                                                                       |     |     |     | 2     | 0  | S03    |
| ..... <b>cAgauccggauccggcuuugacga</b> .....                                                                                                        |     |     |     | 1     | 1  | S03    |
| ..... <b>ggauccggauccggcuuugac</b> .....                                                                                                           |     |     |     | 1     | 0  | S03    |
| ..... <b>ggauccggauccggcuuugacg</b> .....                                                                                                          |     |     |     | 2     | 0  | S03    |
| ..... <b>ggauccggauccggcuuugacga</b> .....                                                                                                         |     |     |     | 3     | 0  | S03    |
| ..... <b>gauccggauccggcuuugacga</b> .....                                                                                                          |     |     |     | 4     | 0  | S03    |
| ..... <b>auccggauccggcuuugacg</b> .....                                                                                                            |     |     |     | 1     | 0  | S03    |
| ..... <b>auccggauccggcuuugacga</b> .....                                                                                                           |     |     |     | 5     | 0  | S03    |
| ..... <b>uccggauccggcuuugacgC</b> .....                                                                                                            |     |     |     | 1     | 1  | S03    |
| ..... <b>uccggauccggcuuugacga</b> .....                                                                                                            |     |     |     | 1     | 0  | S03    |
| ..... <b>ccggauccggcuuugacg</b> .....                                                                                                              |     |     |     | 2     | 0  | S03    |
| ..... <b>auccggcuuugacgaaucuaaca</b> .....                                                                                                         |     |     |     | 1     | 0  | S03    |
| ..... <b>uccggcuuugacgaaucuaacau</b> .....                                                                                                         |     |     |     | 1     | 0  | S03    |
| ..... <b>ccgcuuugacgaaucuaacauuu</b> .....                                                                                                         |     |     |     | 1     | 0  | S03    |
| ..... <b>aagauaucggauccggauc</b> .....                                                                                                             |     |     |     | 1     | 0  | S04    |
| ..... <b>auccggauccggauccggcuuuga</b> .....                                                                                                        |     |     |     | 1     | 0  | S04    |
| ..... <b>auccggauccggauccggcuuuga</b> .....                                                                                                        |     |     |     | 1     | 1  | S04    |

Mature

Star

|                                                                                                              |    |   |     |
|--------------------------------------------------------------------------------------------------------------|----|---|-----|
| ucaagauaucggauccggauccggcuuugacgaaucauacuuuuacuaucggauccgacaucuccaucggauccgagauccucagauccgaauccggaucggaaucca |    |   |     |
| .....auccggauccggauccggcuuugaA.....                                                                          | 1  | 1 | S04 |
| .....uccggauccggauccggcuuugac.....                                                                           | 4  | 0 | S04 |
| .....cggauccggauccggcuuugac.....                                                                             | 2  | 0 | S04 |
| .....cggacCccggauccggcuuugac.....                                                                            | 1  | 1 | S04 |
| .....cggauccggauccggcuuugacU.....                                                                            | 2  | 1 | S04 |
| .....cggauccggauccggcuuugacC.....                                                                            | 1  | 1 | S04 |
| .....cggauccggauccggcuCugacg.....                                                                            | 1  | 1 | S04 |
| .....cggauccggauccggcuuugacg.....                                                                            | 25 | 0 | S04 |
| .....cggauccggauccggcuuugacA.....                                                                            | 5  | 1 | S04 |
| .....cggauccggauccggcuuuga.....                                                                              | 1  | 0 | S04 |
| .....cggacAaccggauccggcuuuga.....                                                                            | 1  | 1 | S04 |
| .....cggauccggauccggcuuugac.....                                                                             | 1  | 0 | S04 |
| .....cggauccggauccggcuuugacg.....                                                                            | 10 | 0 | S04 |
| .....cggauccggauccggcuuugacA.....                                                                            | 7  | 1 | S04 |
| .....cggauccggauccggcuuugacga.....                                                                           | 3  | 0 | S04 |
| .....ggauccggauccggcuuugac.....                                                                              | 2  | 0 | S04 |
| .....ggauccggauccggcuuugacg.....                                                                             | 2  | 0 | S04 |
| .....ggauccggauccggcuuugacga.....                                                                            | 3  | 0 | S04 |
| .....ggauUcggauccggcuuugacga.....                                                                            | 1  | 1 | S04 |
| .....gauccggauccggcuuugacga.....                                                                             | 4  | 0 | S04 |
| .....auccggauccggcuuugac.....                                                                                | 7  | 0 | S04 |
| .....auccggauccggcuuugacg.....                                                                               | 1  | 0 | S04 |
| .....aucGggauccggcuuugacg.....                                                                               | 1  | 1 | S04 |
| .....auccggauccggcuuugacgC.....                                                                              | 1  | 1 | S04 |
| .....auccggauccggcuuugacga.....                                                                              | 7  | 0 | S04 |
| .....uccggauccggcuuugacU.....                                                                                | 1  | 1 | S04 |
| .....uccggauccggcuuugacg.....                                                                                | 3  | 0 | S04 |
| .....uccggauccggcuuugacga.....                                                                               | 3  | 0 | S04 |
| .....cggauccggcuuugacg.....                                                                                  | 1  | 0 | S04 |
| .....cggauccggcuuugacga.....                                                                                 | 1  | 0 | S04 |
| .....cggauccggcuuugacgaa.....                                                                                | 1  | 0 | S04 |
| .....acaucuccaucggauccgagaucc.....                                                                           | 1  | 0 | S04 |
| .....caucuccaucggauccgagauccU.....                                                                           | 1  | 1 | S04 |
| .....ccaucggauccgagauccgagaucc.....                                                                          | 1  | 0 | S04 |
| .....auccggauccgagauccgagauccgaa.....                                                                        | 1  | 0 | S04 |

Provisional ID : chrC07\_2210317  
 Score total : 6.3  
 Score for star read(s) : 3.9  
 Score for read counts : 4.7  
 Score for mfe : -2.2  
 Score for randfold : 0  
 Score for cons. seed :  
 Total read count : 21  
 Mature read count : 20  
 Loop read count : 0  
 Star read count : 1

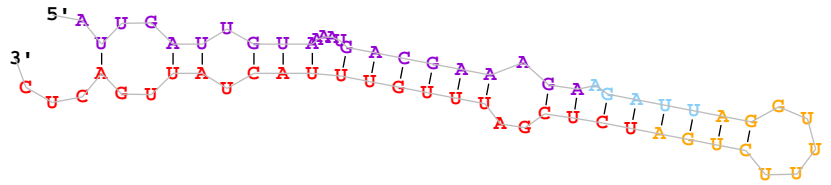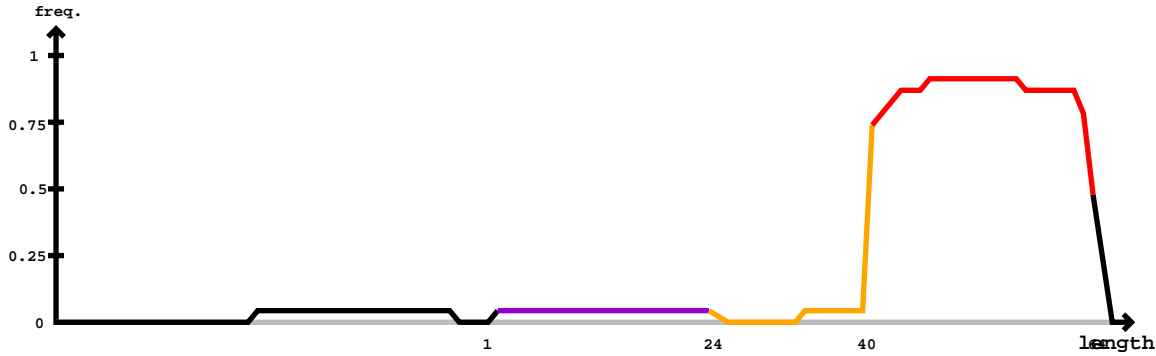

Star
Mature

|                                                                                                                                                                                                                                                                                                                                                                                                                                                                                                                                                                                                                                                                                                                                                                                                                                                            |                                                                                                    |
|------------------------------------------------------------------------------------------------------------------------------------------------------------------------------------------------------------------------------------------------------------------------------------------------------------------------------------------------------------------------------------------------------------------------------------------------------------------------------------------------------------------------------------------------------------------------------------------------------------------------------------------------------------------------------------------------------------------------------------------------------------------------------------------------------------------------------------------------------------|----------------------------------------------------------------------------------------------------|
| 5' - uuaaguuuugcggugcacaauacaccaaagccaguuaggcaguuugauuguaaaaugacgaaagaagauuagguuuuucugaucucgauuuuguuuacuauugacucugc<br>uuaaguuuugcggugcacaauacaccaaagccaguuaggcaguuugauuguaaaaugacgaaagaagauuagguuuuucugaucucgauuuuguuuacuauugacucugc<br>....(((((((.....)))))).....((((.....(((((((.....)))))).....)))))).....((((.....))))<br>.....aaaucaccaaagccaguuagU.....<br>.....uuucugaucucgauuuuguuuacG.....<br>.....ucucgauuuuguuuacuauugac.....<br>.....ucucgauuuuguuuacuauugacG....<br>.....ucucgauuuuguuuacuauugacu...<br>.....ucucgauuuuguuuacuauuUacu...<br>.....ucucgauuuuguuuacuauugacuc...<br>.....ucgauuuuguuuacuauugacucuc...<br>.....uuuguuuacuauugacucA..<br><br>.....auugauuguaaaaugacgaaaga.....<br>.....ucucgauuuuguuuacuauugacG....<br>.....ucucgauuuuguuuacuauugacuc...<br>.....cucgauuuugCuacuauugacucuc...<br>.....cgauuuuguuuacuauugacucuc.. | -3' obs<br>exp<br><br>reads<br>mm<br>sample                                                        |
|                                                                                                                                                                                                                                                                                                                                                                                                                                                                                                                                                                                                                                                                                                                                                                                                                                                            | 1<br>1<br>1<br>2<br>2<br>3<br>1<br>4<br>1<br>1<br><br>1<br>1<br>3<br>1<br>1                        |
|                                                                                                                                                                                                                                                                                                                                                                                                                                                                                                                                                                                                                                                                                                                                                                                                                                                            | 1<br>1<br>0<br>1<br>0<br>0<br>0<br>0<br>0<br>1<br><br>0<br>1<br>0<br>1<br>0                        |
|                                                                                                                                                                                                                                                                                                                                                                                                                                                                                                                                                                                                                                                                                                                                                                                                                                                            | S03<br>S03<br>S03<br>S03<br>S03<br>S03<br>S03<br>S03<br>S03<br><br>S04<br>S04<br>S04<br>S04<br>S04 |



Provisional ID : chrC07\_2217098  
 Score total : 0.1  
 Score for star read(s) : -1.3  
 Score for read counts : 0  
 Score for mfe : 1.4  
 Score for randfold : 0  
 Score for cons. seed :  
 Total read count : 257  
 Mature read count : 257  
 Loop read count : 0  
 Star read count : 0

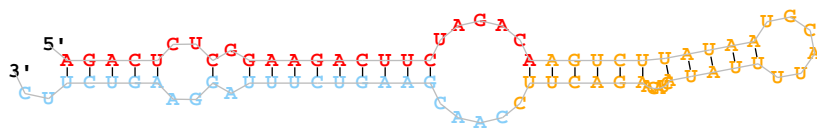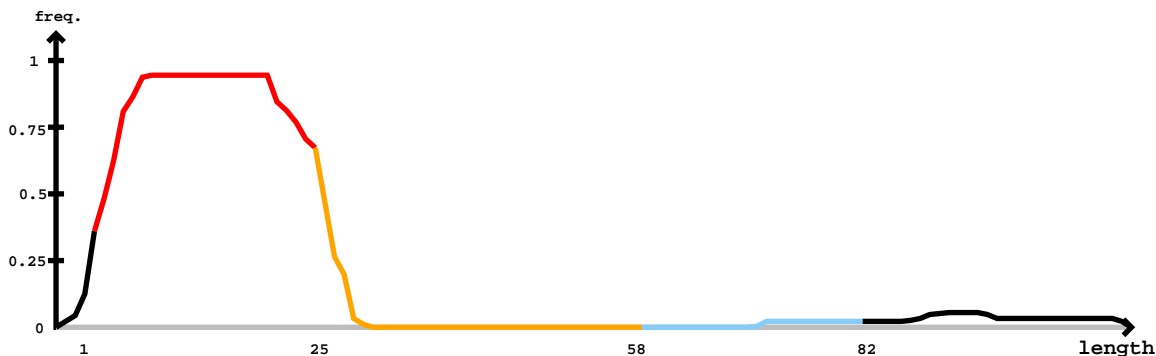

**Mature**

**Star**

| 5' -                                                          | reads | exp | mm | sample |
|---------------------------------------------------------------|-------|-----|----|--------|
| gaagacucucggaagacuucuaagacaagucuuuaauggcauuuuuauacuagaagacuuc | 1     | 1   | 1  | S03    |
| gaagacucucggaagacuucuaagacaagucuuuaauggcauuuuuauacuagaagacuuc | 1     | 1   | 1  | S03    |
| gaagacucucggaagacuucuaagacaagucuuuaauggcauuuuuauacuagaagacuuc | 1     | 0   | 0  | S03    |
| gaagacucucggaagacuucuaagacaagucuuuaauggcauuuuuauacuagaagacuuc | 5     | 1   | 1  | S03    |
| .aagacucucggaagacuucu                                         | 2     | 0   | 0  | S03    |
| .aagacucucggaagacuucua                                        | 1     | 1   | 1  | S03    |
| .aagacucucggaagacuucua                                        | 4     | 1   | 1  | S03    |
| .aagacucucggaagacuucua                                        | 1     | 0   | 0  | S03    |
| .aagacucucggaagacuucua                                        | 4     | 1   | 1  | S03    |
| .agacucucggaagacuucu                                          | 3     | 0   | 0  | S03    |
| .agacucucggaagacuucu                                          | 3     | 1   | 1  | S03    |
| .agacucucggaagacuucu                                          | 7     | 1   | 1  | S03    |
| .agacucucggaagacuucu                                          | 11    | 1   | 1  | S03    |
| .agacucucggaagacuucu                                          | 1     | 0   | 0  | S03    |
| .gacucucggaagacuucu                                           | 8     | 0   | 0  | S03    |
| .gacucucggaagacuucu                                           | 1     | 1   | 1  | S03    |
| .gacucucggaagacuucu                                           | 1     | 1   | 1  | S03    |
| .gacucucggaagacuucu                                           | 7     | 1   | 1  | S03    |
| .gacucucggaagacuucu                                           | 1     | 1   | 1  | S03    |
| .acucucggaagacuucu                                            | 3     | 1   | 1  | S03    |
| .acucucggaagacuucu                                            | 7     | 1   | 1  | S03    |
| .acucucggaagacuucu                                            | 1     | 1   | 1  | S03    |
| .cucucggaagacuucu                                             | 10    | 1   | 1  | S03    |
| .cucucggaagacuucu                                             | 1     | 1   | 1  | S03    |
| .cucucggaagacuucu                                             | 1     | 0   | 0  | S03    |
| .cucucggaagacuucu                                             | 18    | 1   | 1  | S03    |
| .ucucggaagacuucu                                              | 3     | 1   | 1  | S03    |
| .ucucggaagacuucu                                              | 2     | 1   | 1  | S03    |
| .ucucggaagacuucu                                              | 1     | 1   | 1  | S03    |
| .cucggaagacuucu                                               | 2     | 1   | 1  | S03    |
| .cucggaagacuucu                                               | 1     | 1   | 1  | S03    |
| .cucggaagacuucu                                               | 6     | 1   | 1  | S03    |
| .cucggaagacuucu                                               | 1     | 1   | 1  | S03    |
| .Aggaagucucugcccaagugg                                        | 1     | 1   | 1  | S03    |

Mature

Star

|                                                            |                                                   |   |     |  |
|------------------------------------------------------------|---------------------------------------------------|---|-----|--|
| gaagacucucggaagacuucagacaagucuuuaaugcauuuuuacuagaagaacucuc | caacgaagucuuuaggaagucucugcccaagugguacaaauuuuggaua |   |     |  |
| .....aaagugguacaaauuuuggauG                                | 1                                                 | 1 | S03 |  |
| .....aagugguacaaauuuuggaua                                 | 2                                                 | 0 | S03 |  |
| .....agugguacaaauuuuggaua                                  | 1                                                 | 0 | S03 |  |
| gaagacucucggaUacuucua                                      | 1                                                 | 1 | S04 |  |
| gaagacucucggaUacuucuaG                                     | 1                                                 | 1 | S04 |  |
| gaagacucucggaUacuucuaG                                     | 1                                                 | 1 | S04 |  |
| gaagacucucggaagacuucuaG                                    | 1                                                 | 0 | S04 |  |
| .aagacucucggaagacuucu                                      | 4                                                 | 0 | S04 |  |
| .aagacucucggaagacuucua                                     | 2                                                 | 0 | S04 |  |
| .aagacucucggaagacuucuaG                                    | 1                                                 | 0 | S04 |  |
| .aagacucucggaUacuucuaG                                     | 1                                                 | 1 | S04 |  |
| .aagacucucggaagacuucuaG                                    | 1                                                 | 1 | S04 |  |
| .aagacucucggaagacuucuaG                                    | 1                                                 | 0 | S04 |  |
| .agacucucggaagacuucua                                      | 1                                                 | 0 | S04 |  |
| .agacucucggaagacuucuaG                                     | 1                                                 | 0 | S04 |  |
| .agacucucgUaagacuucuaG                                     | 1                                                 | 1 | S04 |  |
| .agacucucggaagacuucuaG                                     | 1                                                 | 0 | S04 |  |
| .agacucucggaagacuucUgac                                    | 1                                                 | 1 | S04 |  |
| .agacucucggaagacuucuaG                                     | 1                                                 | 0 | S04 |  |
| .agacucucggaagacuucuaG                                     | 23                                                | 0 | S04 |  |
| .aUacuucucggaagacuucuaG                                    | 1                                                 | 1 | S04 |  |
| .agacucucggaagacuucuaAaca                                  | 1                                                 | 1 | S04 |  |
| .agacucucgGagacuucuaG                                      | 1                                                 | 1 | S04 |  |
| .agacucucggaagacuucuaG                                     | 1                                                 | 1 | S04 |  |
| .agacucucAgaagacuucuaG                                     | 1                                                 | 1 | S04 |  |
| .agacucucggaUacuucuaG                                      | 3                                                 | 1 | S04 |  |
| .agGcucucggaagacuucuaG                                     | 1                                                 | 1 | S04 |  |
| .agacucucggaagacuucuaG                                     | 1                                                 | 1 | S04 |  |
| .gacucucggaagacuucu                                        | 10                                                | 0 | S04 |  |
| .gacucucggaagacuucua                                       | 1                                                 | 0 | S04 |  |
| .gacucucggaagacuucuaG                                      | 3                                                 | 0 | S04 |  |
| .gacucucggaagacuucCagacaa                                  | 1                                                 | 1 | S04 |  |
| .acucucggaagacuucua                                        | 2                                                 | 0 | S04 |  |
| .acucucggaagacuucuaG                                       | 15                                                | 0 | S04 |  |
| .acucucggaagacuucuaG                                       | 1                                                 | 1 | S04 |  |
| .acucucggaagacuucuaG                                       | 1                                                 | 1 | S04 |  |
| .acucucggaagacuucuaG                                       | 1                                                 | 0 | S04 |  |
| .acucucggaagacuucuaG                                       | 8                                                 | 0 | S04 |  |
| .cucucggaagacuucuaG                                        | 1                                                 | 1 | S04 |  |
| .cucucggaagacuucuaG                                        | 9                                                 | 0 | S04 |  |
| .cucucggaagacuucuaG                                        | 2                                                 | 0 | S04 |  |
| .cucucggaagacuucuaG                                        | 1                                                 | 1 | S04 |  |
| .cucucggaagacuucuaG                                        | 5                                                 | 0 | S04 |  |
| .cucucggaUacuucuaG                                         | 2                                                 | 1 | S04 |  |
| .ucucggaagacuucuaG                                         | 1                                                 | 1 | S04 |  |
| .ucucggaagacuucuaG                                         | 1                                                 | 0 | S04 |  |
| .ucucggaagacuucuaG                                         | 1                                                 | 0 | S04 |  |
| .ucucggaagacuucuaG                                         | 1                                                 | 1 | S04 |  |
| .ucucggaagacuucuaG                                         | 1                                                 | 1 | S04 |  |
| .ucucggaagacuucuaG                                         | 4                                                 | 0 | S04 |  |
| .ucucggaagacuucuaG                                         | 1                                                 | 1 | S04 |  |
| .cucggaagacuucuaG                                          | 3                                                 | 0 | S04 |  |
| .cucggaagacuucuaG                                          | 5                                                 | 0 | S04 |  |
| .cucggaagacuucuaG                                          | 1                                                 | 1 | S04 |  |
| .cucggaagacuucuaG                                          | 1                                                 | 0 | S04 |  |
| .ucggaagacuucuaG                                           | 1                                                 | 1 | S04 |  |
| .....aggaagucucugcccaagugg                                 | 1                                                 | 0 | S04 |  |
| .....aggaagucucugcccaaguggu                                | 2                                                 | 0 | S04 |  |
| .....aggaagucucugcccaaguggC                                | 2                                                 | 1 | S04 |  |
| .....caaagugguacaaauuuuggau                                | 1                                                 | 0 | S04 |  |
| .....aaagugguacaaauuuuggau                                 | 1                                                 | 0 | S04 |  |
| .....aagugguacaaauuuuggau                                  | 1                                                 | 0 | S04 |  |
| .....aagugguacaaauuuuggaua                                 | 1                                                 | 0 | S04 |  |
| .....gugguacaaauuuuggaua                                   | 1                                                 | 0 | S04 |  |

Provisional ID : chrC07\_2222606  
Score total : 9.8  
Score for star read(s) : 3.9  
Score for read counts : 18.5  
Score for mfe : -12.5  
Score for randfold : 0  
Score for cons. seed :  
Total read count : 48  
Mature read count : 27  
Loop read count : 20  
Star read count : 1

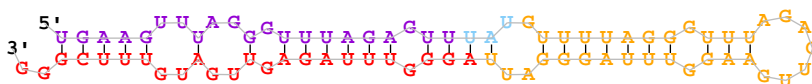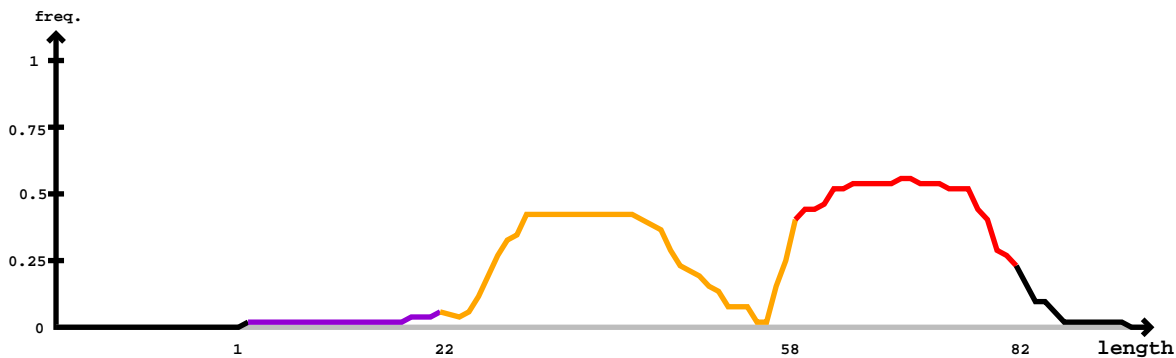

Star

Mature

| 5' -                                                                                                                | reads | mm | sample |
|---------------------------------------------------------------------------------------------------------------------|-------|----|--------|
| ugguuuaggguuuuaaaguuugaaguuuaggguuuagaguuuauguuuuaggguuuagaguuugaaguuuagggauuaggguuuagaguuugauguuucgggauuuaggguuuag | 1     | 0  | S03    |
| ugguuuaggguuuuaaaguuugaaguuuaggguuuagaguuuauguuuuaggguuuagaguuugaaguuuagggauuaggguuuagaguuugauguuucgggauuuaggguuuag | 1     | 0  | S03    |
| .....(((((((((((((((((((.....)))))))))))))))))))))))))).                                                            | 1     | 0  | S03    |
| .....uuuaggguuuagaguuuga.....                                                                                       | 1     | 0  | S03    |
| .....uuuaggguuuagaguuuga.....                                                                                       | 1     | 0  | S03    |
| .....uuaggguuuagaguuuga.....                                                                                        | 1     | 0  | S03    |
| .....uuaggguuuagaguuuga.....                                                                                        | 1     | 0  | S03    |
| .....uuaggguuuagaguuuga.....                                                                                        | 1     | 0  | S03    |
| .....uuuaggguuuagaguuuga.....                                                                                       | 1     | 0  | S03    |
| .....uuuaggguuuagaguuuga.....                                                                                       | 3     | 0  | S03    |
| .....uuaggguuuagaguuuga.....                                                                                        | 1     | 0  | S03    |
| .....uuuaggguuuagaguuuga.....                                                                                       | 1     | 0  | S03    |
| .....uuuaggguuuagaguuuga.....                                                                                       | 1     | 0  | S03    |
| .....uuuaggguuuagaguuuga.....                                                                                       | 1     | 0  | S03    |
| .....uuuaggguuuagaguuuga.....                                                                                       | 1     | 0  | S03    |
| .....uuuaggguuuagaguuuga.....                                                                                       | 1     | 1  | S03    |
| .....uuuaggguuuagaguuuga.....                                                                                       | 1     | 0  | S03    |
| .....uuuaggguuuagaguuuga.....                                                                                       | 1     | 0  | S03    |
| .....uuuaggguuuagaguuuga.....                                                                                       | 1     | 1  | S03    |
| .....uuuaggguuuagaguuuga.....                                                                                       | 1     | 0  | S03    |
| .....uuuaggguuuagaguuuga.....                                                                                       | 1     | 0  | S03    |
| .....uuuaggguuuagaguuuga.....                                                                                       | 1     | 1  | S04    |
| .....uuuaggguuuagaguuuga.....                                                                                       | 1     | 1  | S04    |
| .....uuuaggguuuagaguuuga.....                                                                                       | 1     | 1  | S04    |
| .....uuuaggguuuagaguuuga.....                                                                                       | 1     | 1  | S04    |
| .....uuuaggguuuagaguuuga.....                                                                                       | 1     | 0  | S04    |
| .....uuuaggguuuagaguuuga.....                                                                                       | 1     | 0  | S04    |
| .....uuuaggguuuagaguuuga.....                                                                                       | 1     | 0  | S04    |
| .....uuuaggguuuagaguuuga.....                                                                                       | 1     | 1  | S04    |
| .....uuuaggguuuagaguuuga.....                                                                                       | 1     | 0  | S04    |
| .....uuuaggguuuagaguuuga.....                                                                                       | 1     | 0  | S04    |
| .....uuuaggguuuagaguuuga.....                                                                                       | 1     | 0  | S04    |
| .....uuuaggguuuagaguuuga.....                                                                                       | 2     | 0  | S04    |
| .....uuuaggguuuagaguuuga.....                                                                                       | 1     | 0  | S04    |
| .....uuuaggguuuagaguuuga.....                                                                                       | 1     | 0  | S04    |
| .....uuuaggguuuagaguuuga.....                                                                                       | 1     | 1  | S04    |
| .....uuuaggguuuagaguuuga.....                                                                                       | 1     | 1  | S04    |
| .....uuuaggguuuagaguuuga.....                                                                                       | 1     | 0  | S04    |



Star

Mature

|                                                                                                                      |   |   |     |
|----------------------------------------------------------------------------------------------------------------------|---|---|-----|
| ugguuuaggguuuaaagugaaguuuaggguuuagaguuuauuguuuuaggguuuagaguuugaaggguuuagggauuaggguuuagaguuugauguuucgggaauuuaggguuuag |   |   |     |
| .....gggauuagggGuuagaguu.....                                                                                        | 1 | 1 | S04 |
| .....uuaggguuuagaguuagau.....                                                                                        | 1 | 0 | S04 |
| .....uuaggguuuagaguuaguu.....                                                                                        | 1 | 0 | S04 |
| .....Nuaggguuuagaguuaguuucg.....                                                                                     | 1 | 1 | S04 |
| .....uaggguuuagaguuaguu.....                                                                                         | 1 | 0 | S04 |
| .....uaggguuuagaguuaguu.....                                                                                         | 1 | 0 | S04 |
| .....uaggguuuagaguuaguuuc.....                                                                                       | 2 | 0 | S04 |
| .....aggguuuagaguuaguuuu.....                                                                                        | 1 | 0 | S04 |
| .....aggguuuagaguuaguuucgg.....                                                                                      | 1 | 0 | S04 |
| .....aggguuuagaguuaguuucggg.....                                                                                     | 2 | 0 | S04 |
| .....ggguuuagaguuaguuucgg.....                                                                                       | 1 | 0 | S04 |
| .....ggguuuagaguuaguuucggga.....                                                                                     | 1 | 0 | S04 |
| .....uagaguuaguuucgCga.....                                                                                          | 1 | 1 | S04 |





Star

Mature

|                     |                             |                                      |                          |                          |     |   |     |
|---------------------|-----------------------------|--------------------------------------|--------------------------|--------------------------|-----|---|-----|
| cggauccaagauuuuacua | uccggauucggauccagacacccccga | auauccuauuuuucggagcggauccggaguggauuc | ggauucggaucggaucggaaua   | auaagucc                 |     |   |     |
| .....               | .....                       | .....                                | gGucgaaucggaucggaau      | .....                    | 1   | 1 | S03 |
| .....               | .....                       | .....                                | .....                    | auccggauucggaaua         | 1   | 0 | S03 |
| .....               | .....                       | .....                                | .....                    | uccggauucggaaua          | 3   | 0 | S03 |
| .....               | .....                       | .....                                | .....                    | cggaucggaaua             | 7   | 0 | S03 |
| .....               | .....                       | .....                                | .....                    | cggaucggaaua             | 1   | 0 | S03 |
| .....               | gauuuuacua                  | uccggau                              | .....                    | .....                    | 1   | 0 | S04 |
| .....               | .....                       | .....                                | ccggaguggauucggaucggaauU | .....                    | 1   | 1 | S04 |
| .....               | .....                       | .....                                | .....                    | cggaucggaucggaau         | 1   | 0 | S04 |
| .....               | .....                       | .....                                | .....                    | cggaucggaucggaauU        | 1   | 1 | S04 |
| .....               | .....                       | .....                                | .....                    | ggaguggauucggaucggaauU   | 1   | 1 | S04 |
| .....               | .....                       | .....                                | .....                    | ggaguggauucggaucggaauUcg | 1   | 1 | S04 |
| .....               | .....                       | .....                                | .....                    | ucucggauucggaucggauc     | 4   | 0 | S04 |
| .....               | .....                       | .....                                | .....                    | ucucggauucggaucggauc     | 3   | 0 | S04 |
| .....               | .....                       | .....                                | .....                    | ucucggauucggaucggauc     | 9   | 0 | S04 |
| .....               | .....                       | .....                                | .....                    | cucggauucggaucggauc      | 1   | 0 | S04 |
| .....               | .....                       | .....                                | .....                    | cucggauucggaucggauc      | 1   | 1 | S04 |
| .....               | .....                       | .....                                | .....                    | cucggauucggaucggauc      | 1   | 0 | S04 |
| .....               | .....                       | .....                                | .....                    | cucggauucggaucggauc      | 1   | 0 | S04 |
| .....               | .....                       | .....                                | .....                    | ucggauucggaucggaucggaauU | 11  | 1 | S04 |
| .....               | .....                       | .....                                | .....                    | cggaucggaucggaucggauc    | 1   | 1 | S04 |
| .....               | .....                       | .....                                | .....                    | cggaucggaucggaucggauc    | 6   | 0 | S04 |
| .....               | .....                       | .....                                | .....                    | cggaucggaucggaucggauc    | 25  | 0 | S04 |
| .....               | .....                       | .....                                | .....                    | cggaucggaucggaucggauc    | 2   | 1 | S04 |
| .....               | .....                       | .....                                | .....                    | cggaucggaucggaucggauc    | 1   | 1 | S04 |
| .....               | .....                       | .....                                | .....                    | ggauucggaucggaucggauc    | 2   | 0 | S04 |
| .....               | .....                       | .....                                | .....                    | ggauucggaucggaucggauc    | 4   | 0 | S04 |
| .....               | .....                       | .....                                | .....                    | ggauucggaucggaucggauc    | 39  | 0 | S04 |
| .....               | .....                       | .....                                | .....                    | ggauucggaucggaucggauc    | 1   | 1 | S04 |
| .....               | .....                       | .....                                | .....                    | ggauucggaucggaucggauc    | 1   | 1 | S04 |
| .....               | .....                       | .....                                | .....                    | ggauucggaucggaucggauc    | 2   | 1 | S04 |
| .....               | .....                       | .....                                | .....                    | ggauucggaucggaucggauc    | 1   | 1 | S04 |
| .....               | .....                       | .....                                | .....                    | ggauucggaucggaucggauc    | 4   | 1 | S04 |
| .....               | .....                       | .....                                | .....                    | ggauucggaucggaucggauc    | 108 | 1 | S04 |
| .....               | .....                       | .....                                | .....                    | ggauucggaucggaucggauc    | 1   | 1 | S04 |
| .....               | .....                       | .....                                | .....                    | gCaucggaucggaucggauc     | 1   | 1 | S04 |
| .....               | .....                       | .....                                | .....                    | ggauucggaucggaucggauc    | 1   | 1 | S04 |
| .....               | .....                       | .....                                | .....                    | ggauucggaucggaucggauc    | 1   | 1 | S04 |
| .....               | .....                       | .....                                | .....                    | ggauucggaucggaucggauc    | 365 | 0 | S04 |
| .....               | .....                       | .....                                | .....                    | ggauucggaucggaucggauc    | 1   | 1 | S04 |
| .....               | .....                       | .....                                | .....                    | ggauucggaucggaucggauc    | 4   | 1 | S04 |
| .....               | .....                       | .....                                | .....                    | ggauucggaucggaucggauc    | 1   | 1 | S04 |
| .....               | .....                       | .....                                | .....                    | ggauucggaucggaucggauc    | 11  | 0 | S04 |
| .....               | .....                       | .....                                | .....                    | ggauucggaucggaucggauc    | 1   | 1 | S04 |
| .....               | .....                       | .....                                | .....                    | ggauucggaucggaucggauc    | 1   | 0 | S04 |
| .....               | .....                       | .....                                | .....                    | gaucggaucggaucggauc      | 1   | 0 | S04 |
| .....               | .....                       | .....                                | .....                    | gaucggaucggaucggauc      | 2   | 1 | S04 |
| .....               | .....                       | .....                                | .....                    | gaucggaucggaucggauc      | 4   | 0 | S04 |
| .....               | .....                       | .....                                | .....                    | gaucggaucggaucggauc      | 1   | 0 | S04 |
| .....               | .....                       | .....                                | .....                    | ucggaucggaucggaucggauc   | 1   | 0 | S04 |
| .....               | .....                       | .....                                | .....                    | auccggauucggaucggauc     | 1   | 1 | S04 |
| .....               | .....                       | .....                                | .....                    | ccggauucggaucggaucggauc  | 6   | 0 | S04 |
| .....               | .....                       | .....                                | .....                    | cggaucggaucggaucggauc    | 1   | 0 | S04 |
| .....               | .....                       | .....                                | .....                    | aucggaucggaucggauc       | 1   | 0 | S04 |













Provisional ID : chrC07\_2272418  
 Score total : 4.8  
 Score for star read(s) : 3.9  
 Score for read counts : 0.6  
 Score for mfe : 0.3  
 Score for randfold : 0  
 Score for cons. seed :  
 Total read count : 13  
 Mature read count : 11  
 Loop read count : 1  
 Star read count : 1

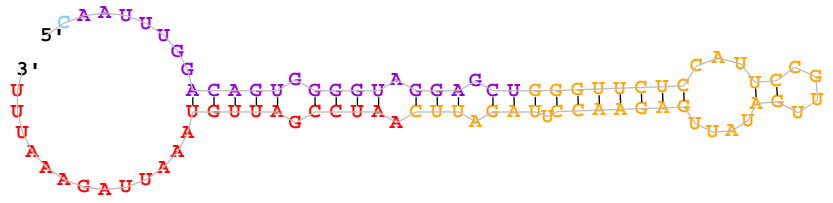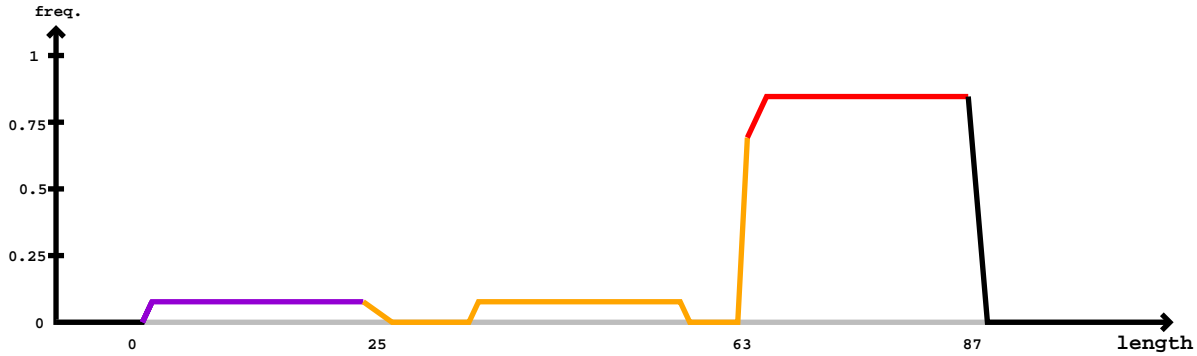

**Star**

**Mature**

| 5' -     | Star                   | Mature                                     | -3'                     | obs                 | exp | reads | mm  | sample |
|----------|------------------------|--------------------------------------------|-------------------------|---------------------|-----|-------|-----|--------|
| uuaccugc | cauuuggacaguggguaggagc | uggguucccgaauccguugauuugagaaccuuagauuca    | aaucggauguaaaauagaaauuu | gaaauagguaaacaauuug | 1   | 0     | S03 |        |
| uuaccugc | cauuuggacaguggguagg    | agcuggguucccgaauccguugauuugagaaccuuagauuca | aaucggauguaaaauagaaauuu | gaaauagguaaacaauuug | 3   | 0     | S03 |        |
| .....    | .....                  | .....                                      | .....                   | .....               | 1   | 1     | S04 |        |
| .....    | .....                  | .....                                      | .....                   | .....               | 6   | 0     | S04 |        |
| .....    | .....                  | .....                                      | .....                   | .....               | 1   | 0     | S04 |        |
| .....    | .....                  | .....                                      | .....                   | .....               | 1   | 1     | S04 |        |





Star

Mature

| Sequence                                | Star | Mature | Category |
|-----------------------------------------|------|--------|----------|
| cauggguagauguaggccugagacuuuuuauccgagauc | 1    | 0      | S03      |
| .....auccggauaguaaaauguugga.....        | 1    | 1      | S03      |
| .....auccggauaguaaaauguuggauA.....      | 1    | 1      | S03      |
| .....auccggauaguaaaauguuUgauu.....      | 1    | 0      | S03      |
| .....auccggauaguaaaauguuggauu.....      | 1    | 0      | S03      |
| .....ccggauaguaaaauguuggauu.....        | 1    | 0      | S03      |
| .....cggauaguaaaauguugg.....            | 1    | 0      | S03      |
| .....cggauaguaaaauguuggauu.....         | 1    | 0      | S03      |
| .....aaaauguuggauucgucaaaagcc.....      | 1    | 0      | S03      |
| .....agauguaggccugagacuuuuuaucc.....    | 1    | 0      | S04      |
| .....uaggccugagacuuuuuauccg.....        | 1    | 0      | S04      |
| .....uaggccugagacuuuuuauccgag.....      | 1    | 0      | S04      |
| .....uaggccugagacuuuuuauccgaga.....     | 1    | 0      | S04      |
| .....aggccugagacuuuuuauccg.....         | 1    | 0      | S04      |
| .....aggccugagacuuuuuauccgaga.....      | 1    | 0      | S04      |
| .....aggccugagacuuuuuauccgagau.....     | 9    | 0      | S04      |
| .....aggccugagacuuuuuauccgagaG.....     | 2    | 1      | S04      |
| .....aggccugagacuuuuuauccgagauA.....    | 2    | 1      | S04      |
| .....cugagacuuuuuauccgagaucc.....       | 1    | 0      | S04      |
| .....auccgaaaauccggauauccgg.....        | 2    | 0      | S04      |
| .....auccgaaaauccggauauccggagC.....     | 1    | 1      | S04      |
| .....cggagaggccggauccggauG.....         | 1    | 1      | S04      |
| .....ggccggauccggauaguaaaaugG.....      | 1    | 1      | S04      |
| .....ccggauccggauaguaaaaugu.....        | 2    | 0      | S04      |
| .....ccggauccggauaguaaaauguu.....       | 6    | 0      | S04      |
| .....ccggauccggauagCaaaauguug.....      | 1    | 1      | S04      |
| .....ccggauccggauaguaaaauguug.....      | 17   | 0      | S04      |
| .....ccggauccggauaguaaaauguuC.....      | 1    | 1      | S04      |
| .....ccggauccggauaguaaaauguugU.....     | 1    | 1      | S04      |
| .....cggauccggauaguaaaauguu.....        | 18   | 0      | S04      |
| .....cggauccggauaguaaaauguug.....       | 9    | 0      | S04      |
| .....cgUauccggauaguaaaauguug.....       | 1    | 1      | S04      |
| .....Nggauccggauaguaaaauguug.....       | 2    | 1      | S04      |
| .....cggauccggauagAaaaauguug.....       | 1    | 1      | S04      |
| .....cggauccggauaguaaaauguug.....       | 152  | 0      | S04      |
| .....cggauccggauaguGaaauguug.....       | 1    | 1      | S04      |
| .....cggauccggauaguaaaauguugga.....     | 1    | 0      | S04      |
| .....ggauccggauaguaaaauguG.....         | 1    | 1      | S04      |
| .....ggauccggauaguaaaauguu.....         | 2    | 0      | S04      |
| .....ggauccggauaguaaaauguug.....        | 1    | 0      | S04      |
| .....ggauccggauaguaaaauguugg.....       | 7    | 0      | S04      |
| .....ggGuccggauaguaaaauguugga.....      | 1    | 1      | S04      |
| .....ggauccggauaguaaaauguuggG.....      | 1    | 1      | S04      |
| .....ggauccggauaguaaaauguugga.....      | 11   | 0      | S04      |
| .....gauccggauaguaaaaug.....            | 1    | 0      | S04      |
| .....gauccggauaguaaaaugu.....           | 1    | 0      | S04      |
| .....gauccggauaguaaaauguugg.....        | 3    | 0      | S04      |
| .....auccggauaguaaaauguG.....           | 2    | 1      | S04      |
| .....auccggauaguaaaauguu.....           | 6    | 0      | S04      |
| .....auccggauaguaaaauguug.....          | 1    | 0      | S04      |
| .....auccggauaguaaaauguugg.....         | 4    | 0      | S04      |
| .....auccggauaguaaaauguugC.....         | 1    | 1      | S04      |
| .....auccggauaguaaaauguugga.....        | 1    | 0      | S04      |
| .....auccggauaguaaaauguugAuu.....       | 1    | 1      | S04      |
| .....uccggauaguaaaauguG.....            | 1    | 1      | S04      |
| .....uccggauaguaaaauguu.....            | 2    | 0      | S04      |
| .....uccggauaguaaaauguugg.....          | 1    | 0      | S04      |
| .....ccggauaguaaaauguugga.....          | 1    | 0      | S04      |
| .....cggauaguaaaauguugg.....            | 1    | 0      | S04      |
| .....cggauaguaaaauguugga.....           | 1    | 0      | S04      |
| .....cggauaguaaaauguuggau.....          | 1    | 0      | S04      |
| .....cggauaguaaaauguuggauu.....         | 1    | 0      | S04      |
| .....cggauaguaaaauguuggauuU.....        | 1    | 1      | S04      |
| .....uaguaaaauguuggauucgucaaaa.....     | 1    | 0      | S04      |
| .....guaaaauguuggauucgucaaaagc.....     | 2    | 0      | S04      |
| .....aaaauguuggauucgucaaaagccg.....     | 1    | 0      | S04      |
| .....aaauguuggauucgucaaaagc.....        | 1    | 0      | S04      |

Provisional ID : chrC07\_2290868  
 Score total : 18  
 Score for star read(s) : 3.9  
 Score for read counts : 12.9  
 Score for mfe : 1.3  
 Score for randfold : 0  
 Score for cons. seed :  
 Total read count : 37  
 Mature read count : 31  
 Loop read count : 0  
 Star read count : 6

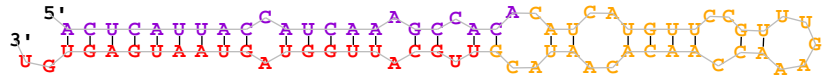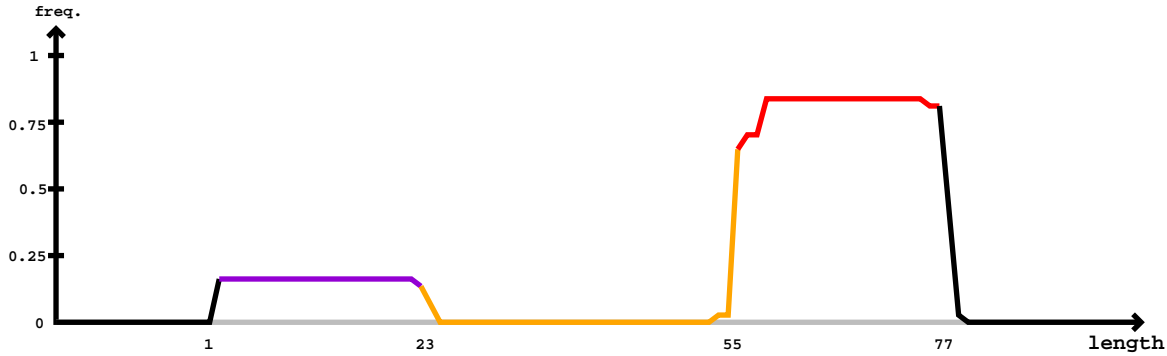

**Star**

**Mature**

| 5' -                                                                                                                                                                                                       | obs | mm    | sample |
|------------------------------------------------------------------------------------------------------------------------------------------------------------------------------------------------------------|-----|-------|--------|
| uaagguaaugggacua <b>acu</b> cauuaccau <b>caaa</b> g <b>ccaca</b> caucauguu <b>ccguu</b> uga <b>aaacca</b> ca <b>caau</b> acg <b>uugcau</b> ugguagua <b>aa</b> ugagugu <b>u</b> cccgcuacc <u>auu</u> ugaggu | -3' | reads | exp    |
| uaagguaaugggacua <b>acu</b> cauuaccau <b>caaa</b> g <b>ccaca</b> caucauguu <b>ccguu</b> uga <b>aaacca</b> ca <b>caau</b> acg <b>uugcau</b> ugguagua <b>aa</b> ugagugu <b>u</b> cccgcuacc <u>auu</u> ugaggu | 1   | 1     | S03    |
| .....uAgcauugguaguaa <b>aa</b> ugagugu.....                                                                                                                                                                | 1   | 1     | S04    |
| .....aAucauuaccau <b>caaa</b> g <b>ccac</b> .....                                                                                                                                                          | 5   | 1     | S04    |
| .....aAucauuaccau <b>caaa</b> g <b>ccaca</b> .....                                                                                                                                                         | 1   | 0     | S04    |
| .....cguugcauugguagua <b>aa</b> ugagugu.....                                                                                                                                                               | 1   | 0     | S04    |
| .....uugcauugguagua <b>aa</b> ugagugu.....                                                                                                                                                                 | 1   | 1     | S04    |
| .....Cugcauugguagua <b>aa</b> ugagugu.....                                                                                                                                                                 | 7   | 1     | S04    |
| .....uAgcauugguagua <b>aa</b> ugagugu.....                                                                                                                                                                 | 1   | 1     | S04    |
| .....Nugcauugguagua <b>aa</b> ugagugu.....                                                                                                                                                                 | 5   | 0     | S04    |
| .....uugcauugguagua <b>aa</b> ugagugu.....                                                                                                                                                                 | 4   | 1     | S04    |
| .....uCGcauugguagua <b>aa</b> ugagugu.....                                                                                                                                                                 | 1   | 1     | S04    |
| .....uugcauugguagua <b>aa</b> ugaguguG.....                                                                                                                                                                | 1   | 1     | S04    |
| .....Gugcauugguagua <b>aa</b> ugagugu.....                                                                                                                                                                 | 1   | 1     | S04    |
| .....uuAcauugguagua <b>aa</b> ugagugu.....                                                                                                                                                                 | 2   | 0     | S04    |
| .....ugcauugguagua <b>aa</b> ugagugu.....                                                                                                                                                                  | 4   | 0     | S04    |
| .....cauugguagua <b>aa</b> ugagugu.....                                                                                                                                                                    | 1   | 0     | S04    |
| .....cauugguagua <b>aa</b> ugaguguuc.....                                                                                                                                                                  |     |       |        |



Star

Mature

| Sequence                               | Star Count | Mature Count | Label |
|----------------------------------------|------------|--------------|-------|
| .....aCugucaaaaaacgauuuuggaacu.....    | 1          | 1            | S03   |
| .....uugucaaaaaacgauuuuggaacuca.....   | 2          | 0            | S03   |
| .....ugucaaaaaacgauuuuggaacAca.....    | 1          | 1            | S03   |
| .....ugucaaaaGacgauuuuggaacuca.....    | 1          | 1            | S03   |
| .....ugucaaaaaacgauuuuggaacuca.....    | 32         | 0            | S03   |
| .....ugucaaaaaacgauuuuggaacucG.....    | 6          | 1            | S03   |
| .....gucaaaaaacgauuuuggaacu.....       | 2          | 0            | S03   |
| .....gucaaaaaacgauuuuggaacuc.....      | 2          | 0            | S03   |
| .....gucaaaaaacgauuuuggaacuca.....     | 73         | 0            | S03   |
| .....gucaaaaaacgauuuugUaacuca.....     | 1          | 1            | S03   |
| .....Cucaaaaaacgauuuuggaacuca.....     | 1          | 1            | S03   |
| .....gucaaaaaacgauuuuggaacucG.....     | 8          | 1            | S03   |
| .....gCcaaaaaacgauuuuggaacuca.....     | 1          | 1            | S03   |
| .....gucaaaaaacgauuuuggaacucC.....     | 1          | 1            | S03   |
| .....gucaaaaaacgauuuuggGacuca.....     | 2          | 1            | S03   |
| .....Uucaaaaaacgauuuuggaacuca.....     | 2          | 1            | S03   |
| .....gAcaaaaacgauuuuggaacuca.....      | 1          | 1            | S03   |
| .....gucaaaaaacgauuuuggaacucU.....     | 2          | 1            | S03   |
| .....gucaaaaaacgauuuuuggaacuca.....    | 1          | 1            | S03   |
| .....gucaaaaaacgauuuuggaacucac.....    | 10         | 0            | S03   |
| .....gucaaaaaacgauuuuggaacucaA.....    | 2          | 1            | S03   |
| .....gucGaaaaacgauuuuggaacucac.....    | 1          | 1            | S03   |
| .....gucaaaaaacgauuuuggaacucaG.....    | 1          | 1            | S03   |
| .....gucaaaaaacgauuuuggaacucaU.....    | 3          | 1            | S03   |
| .....gucaaaaCcguuuuggaacucaaca.....    | 1          | 1            | S03   |
| .....gucaaGaacgauuuuggaacucaca.....    | 1          | 1            | S03   |
| .....gucaaaaaacgauuuuggaacucacC.....   | 1          | 1            | S03   |
| .....gucaaaaaacgauuuuggaacucacG.....   | 1          | 1            | S03   |
| .....gucaaaaaacgauuuuggaacucaca.....   | 6          | 0            | S03   |
| .....gucaaaaaacgauuuuggaacucacaaa..... | 1          | 0            | S03   |
| .....ucaaaaaacgauuuuggaacuca.....      | 13         | 0            | S03   |
| .....ucaaaaaacgauuuuggaacucaA.....     | 1          | 1            | S03   |
| .....ucaaaaaacgauuuuggaacucac.....     | 9          | 0            | S03   |
| .....ucaaaaaacgauuuuggGacucac.....     | 1          | 1            | S03   |
| .....ucaaaaaacgauuuuggaacucaG.....     | 1          | 1            | S03   |
| .....uUaaaaacgauuuuggaacucaca.....     | 1          | 1            | S03   |
| .....Ccaaaaaacgauuuuggaacucaca.....    | 2          | 1            | S03   |
| .....ucaaaaaacgauuuuggaacCcaca.....    | 1          | 1            | S03   |
| .....ucaaaaaacgauuuuggaauUucaca.....   | 1          | 1            | S03   |
| .....ucaaaaaacgauuUcgggaacuca.....     | 1          | 1            | S03   |
| .....ucaaaaaacgauuuuggaacucacU.....    | 3          | 1            | S03   |
| .....ucaaaaaacgauuuuggaacucaca.....    | 176        | 0            | S03   |
| .....ucaaaaaacgauuuuggaacucacG.....    | 12         | 1            | S03   |
| .....ucaaaaaacgauuuUcgggaacucaca.....  | 1          | 1            | S03   |
| .....ucUaaaaacgauuuuggaacucaca.....    | 1          | 1            | S03   |
| .....ucaaaaaacgauuuuggaacucUca.....    | 1          | 1            | S03   |
| .....ucaaaaaacgauuuuggaCucucaca.....   | 1          | 1            | S03   |
| .....ucaaaaaacgauuuuggaacucacC.....    | 1          | 1            | S03   |
| .....ucaaaaaacgauuuuggaacucacaaa.....  | 1          | 0            | S03   |
| .....caaaaaacgauuuuggaac.....          | 1          | 0            | S03   |
| .....caaaaaacgauuuuggaacA.....         | 1          | 1            | S03   |
| .....Aaaaaacgauuuuggaacuc.....         | 1          | 1            | S03   |
| .....caaaaaacgauuuuggaacuU.....        | 1          | 1            | S03   |
| .....caaaaaacgauuuuggaacuc.....        | 1          | 0            | S03   |
| .....caaaaaacgauuuuggaacucG.....       | 1          | 1            | S03   |
| .....caaaaaacAuuuuuggaacuca.....       | 1          | 1            | S03   |
| .....Aaaaaacgauuuuggaacuca.....        | 15         | 1            | S03   |
| .....caGaaacgauuuuggaacuca.....        | 1          | 1            | S03   |
| .....Gaaaaacgauuuuggaacuca.....        | 1          | 1            | S03   |
| .....caaaaaacgauuuuggaacuca.....       | 12         | 0            | S03   |
| .....caaaaaacgauuuuggaacucaU.....      | 2          | 1            | S03   |
| .....caGaaacgauuuuggaacucac.....       | 1          | 1            | S03   |
| .....caaaaaacgauuuuggGacucac.....      | 1          | 1            | S03   |
| .....caaaaaacgauuuuggaacucCc.....      | 1          | 1            | S03   |
| .....caaaaaacgauuuuggUacucac.....      | 1          | 1            | S03   |
| .....Aaaaaacgauuuuggaacucac.....       | 3          | 1            | S03   |
| .....caaaaaacgauuuuggaacucac.....      | 15         | 0            | S03   |
| .....caaaaaacgauuuuggaacucacG.....     | 15         | 1            | S03   |
| .....caaaaaacgauuuuggGacucaca.....     | 1          | 1            | S03   |
| .....caaaaaacgauuuuggaacucUca.....     | 2          | 1            | S03   |













Star

Mature

|                                                                                                                  |    |   |     |
|------------------------------------------------------------------------------------------------------------------|----|---|-----|
| uauauuuuuugcaugauuuucaguuuuuuucuaguagguuucuauuaguuuugcugauaacacuuuugcaaaaaacgauuuuggaacucacaaaacggcgauagaguacguu |    |   |     |
| .....aacgauuuuggaacucacaaaacg.....                                                                               | 13 | 0 | S04 |
| .....acgauuuuggaacucaca.....                                                                                     | 12 | 0 | S04 |
| .....acgauuuuggaacucacaaa.....                                                                                   | 1  | 0 | S04 |
| .....acgauuuuggaacucacaaa.....                                                                                   | 2  | 0 | S04 |
| .....acgauuuuggaacucacaaaA.....                                                                                  | 1  | 1 | S04 |
| .....acgauuuuggaacucacaaaacg.....                                                                                | 1  | 0 | S04 |
| .....acgauuuuggaacucacaaaacgg.....                                                                               | 1  | 0 | S04 |
| .....gauuuuggaacucacaaaacggc.....                                                                                | 1  | 0 | S04 |
| .....auuuuggaacucacaaaacggcg.....                                                                                | 1  | 0 | S04 |
| .....auuuuggaacucacaaaacggcA.....                                                                                | 1  | 1 | S04 |
| .....auuuuggaacucacaaaacggcga.....                                                                               | 4  | 0 | S04 |
| .....auuuuggaacCcacaaaacggcga.....                                                                               | 1  | 1 | S04 |
| .....uuuuggaacucacaaaacg.....                                                                                    | 1  | 0 | S04 |
| .....uuuuggaacucacaaaacgU.....                                                                                   | 2  | 1 | S04 |
| .....uuuuggaacucacaaaacgg.....                                                                                   | 2  | 0 | S04 |
| .....uuuuggaacucacaaaacggc.....                                                                                  | 1  | 0 | S04 |
| .....uuuuggaacucacaaaacggcg.....                                                                                 | 2  | 0 | S04 |
| .....uuuuggaacucacaaaacggcA.....                                                                                 | 1  | 1 | S04 |
| .....uuuuggaacucacaaaacggcgau.....                                                                               | 2  | 0 | S04 |
| .....uuuuggaacucacaaaacgAcgau.....                                                                               | 1  | 1 | S04 |
| .....uuuggaacucacaaaacggcga.....                                                                                 | 2  | 0 | S04 |
| .....uuuggaacucacaaaacggcgau.....                                                                                | 1  | 0 | S04 |
| .....uuuggaacucacaaaacggcgaua.....                                                                               | 3  | 0 | S04 |
| .....uuuggaacucacaaaacggcgauG.....                                                                               | 1  | 1 | S04 |
| .....uuggaacucacaaaacggcgaua.....                                                                                | 1  | 0 | S04 |
| .....uuggaacucacaaaacggcgauag.....                                                                               | 2  | 0 | S04 |
| .....uggaacucacaaaacggcgaua.....                                                                                 | 1  | 0 | S04 |
| .....ggaacucacaaaacggcA.....                                                                                     | 1  | 1 | S04 |
| .....acaaaacggcgauagaguacg.....                                                                                  | 1  | 0 | S04 |

Provisional ID : chrC07\_2297625  
 Score total : 0  
 Score for star read(s) : -1.3  
 Score for read counts : 0  
 Score for mfe : 1.3  
 Score for randfold : 0  
 Score for cons. seed :  
 Total read count : 78  
 Mature read count : 35  
 Loop read count : 43  
 Star read count : 0

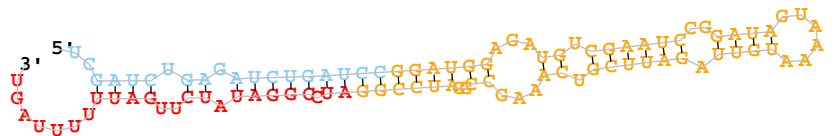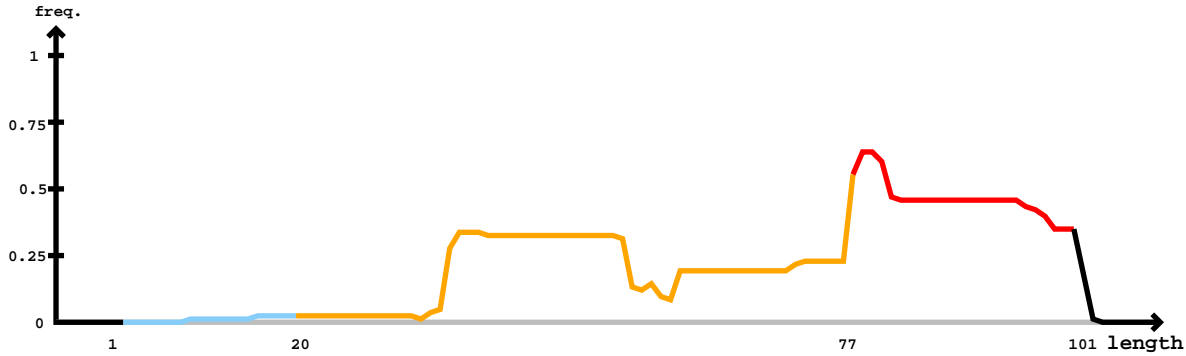

Star

Mature

| 5' -                                                                                                               | 3' - | exp | reads | mm | sample |
|--------------------------------------------------------------------------------------------------------------------|------|-----|-------|----|--------|
| cggauucgaucugagaucugaucggauuggagauugcgaauccggauaguaaaauguuagauucgucaaagccggauccggauccggauaucuugauuuuuuaguuuuggauau |      |     |       |    |        |
| .....gagaucugaucggauuggagauG.....                                                                                  |      |     | 1     | 1  | S03    |
| .....gaaucggauaUuaaaauguuaga.....                                                                                  |      |     | 1     | 1  | S03    |
| .....aucggauaguaaaaugu.....                                                                                        |      |     | 1     | 0  | S03    |
| .....aucggauaguaaaauguu.....                                                                                       |      |     | 4     | 0  | S03    |
| .....aucggauGguaaaauguuaga.....                                                                                    |      |     | 1     | 1  | S03    |
| .....aucggauaguaaaauguuagauu.....                                                                                  |      |     | 1     | 0  | S03    |
| .....aucggauaguaaaauguuUgauu.....                                                                                  |      |     | 1     | 1  | S03    |
| .....aucggGuaguaaaauguuagauu.....                                                                                  |      |     | 1     | 1  | S03    |
| .....uccggauaguaaaauguuaga.....                                                                                    |      |     | 1     | 0  | S03    |
| .....aucgucaaagccggauccggaucc.....                                                                                 |      |     | 1     | 0  | S03    |
| .....cgucaaagccggauccggaucc.....                                                                                   |      |     | 1     | 0  | S03    |
| .....cgucaaagccggauccggauccA.....                                                                                  |      |     | 1     | 1  | S03    |
| .....uccggauccggauaucuugauuuu.....                                                                                 |      |     | 1     | 0  | S03    |
| .....aucggauaucuugauuuuuu.....                                                                                     |      |     | 1     | 0  | S03    |
| .....aucggUuauaucuugauuuuuuagu.....                                                                                |      |     | 1     | 1  | S03    |
| .....aucggauaucuugauuuuuuagA.....                                                                                  |      |     | 1     | 1  | S03    |
| .....aucggauaucuugauuuuuuagu.....                                                                                  |      |     | 8     | 0  | S03    |
| .....uccggauaucuugauuuuuuagG.....                                                                                  |      |     | 1     | 1  | S03    |
| .....uccggauaucuugauuuuuuagu.....                                                                                  |      |     | 1     | 0  | S03    |
| .....gauccggauuggagauugcgaauU.....                                                                                 |      |     | 1     | 1  | S04    |
| .....gaaucggauaguaaaauguuaga.....                                                                                  |      |     | 1     | 0  | S04    |
| .....aaucggauaguaaaauguuagau.....                                                                                  |      |     | 1     | 0  | S04    |
| .....aucggauaguaaaauguu.....                                                                                       |      |     | 6     | 0  | S04    |
| .....aucggauaguaaaauguG.....                                                                                       |      |     | 2     | 1  | S04    |
| .....aucggauaguaaaauguuagauu.....                                                                                  |      |     | 1     | 0  | S04    |
| .....aucggGuaguaaaauguuagauu.....                                                                                  |      |     | 1     | 1  | S04    |
| .....uccggauaguaaaauguG.....                                                                                       |      |     | 1     | 1  | S04    |
| .....uccggauaguaaaauguu.....                                                                                       |      |     | 2     | 0  | S04    |
| .....uccggauaguaaaauguua.....                                                                                      |      |     | 1     | 0  | S04    |
| .....aucgucaaagccggauccggaucc.....                                                                                 |      |     | 1     | 0  | S04    |
| .....cgucaaagccggauccggau.....                                                                                     |      |     | 1     | 0  | S04    |
| .....cgGcaaagccggauccggaucc.....                                                                                   |      |     | 1     | 1  | S04    |
| .....cgucaaagccggauccggaucc.....                                                                                   |      |     | 7     | 0  | S04    |

Star

Mature

|                                                                                                                  |    |   |     |
|------------------------------------------------------------------------------------------------------------------|----|---|-----|
| cggaucggaucgaggaucggaucggaggagagugcgaauccggauaguaaaauguuagauucgucaaagccggauccggauccggauaucuugauuuuuuaguuuuggauau |    |   |     |
| .....cgucaaagccggauccggauA.....                                                                                  | 2  | 1 | S04 |
| .....cgucaaagccggauccggauccg.....                                                                                | 1  | 0 | S04 |
| .....aucgggaCccggauaucuugauuu.....                                                                               | 1  | 1 | S04 |
| .....aucggauccggauaucuugauuC.....                                                                                | 1  | 1 | S04 |
| .....aucggauaucuugauuuuuuu.....                                                                                  | 3  | 0 | S04 |
| .....aucggauaucuugauuuuuuagC.....                                                                                | 1  | 1 | S04 |
| .....aucggauaucuugauuuuuuuagu.....                                                                               | 10 | 0 | S04 |
| .....aucggauaucuugaGuuuuuuagu.....                                                                               | 2  | 1 | S04 |
| .....uccggauaucuugauuuuuuu.....                                                                                  | 2  | 0 | S04 |
| .....uccggauaucuugauuuuuuagC.....                                                                                | 1  | 1 | S04 |
| .....uccggauaucuugauuuuuuuagu.....                                                                               | 2  | 0 | S04 |
| .....ccggauaCcuugauuuuuuaguuu.....                                                                               | 1  | 1 | S04 |





Star

Mature

|                                                                                                                 |   |   |     |
|-----------------------------------------------------------------------------------------------------------------|---|---|-----|
| aaaaggaggaaaacgcgauugaucgucggucgucgucgucuauguuugggcguugugaguccagcaucauagcggucuaaggcgguggaucguuugcagugguuagauagc |   |   |     |
| .....cuagcggucuaaggcgguggauc.....                                                                               | 6 | 0 | S04 |
| .....cuagcggucuaaggcgguggaucC.....                                                                              | 3 | 1 | S04 |
| .....cuagcggucuaaggcgguggaucg.....                                                                              | 1 | 0 | S04 |
| .....cuagcggucuaaggcgguggaucA.....                                                                              | 4 | 1 | S04 |
| .....uagcggucuaaggcggugga.....                                                                                  | 2 | 0 | S04 |
| .....uagcggucuaaggcgguggaU.....                                                                                 | 1 | 1 | S04 |
| .....uagcggucuaaggcgguggauc.....                                                                                | 3 | 0 | S04 |
| .....uagcggucuaaggcgguggaucg.....                                                                               | 2 | 0 | S04 |
| .....uagcggucuaaggcgguggaucA.....                                                                               | 4 | 1 | S04 |
| .....uagcggucuaaggcgguggaucC.....                                                                               | 1 | 1 | S04 |
| .....agcggucuaaggcggugga.....                                                                                   | 3 | 0 | S04 |
| .....agcggucuaaggcgguggaU.....                                                                                  | 1 | 1 | S04 |
| .....agcggucuaaggcgguggauc.....                                                                                 | 1 | 0 | S04 |
| .....agcggucuaaggcgguggaucC.....                                                                                | 2 | 1 | S04 |
| .....agcggucuaaggcgguggaucCuuu.....                                                                             | 1 | 1 | S04 |
| .....gcggucuaaggcgguggaucA.....                                                                                 | 1 | 1 | S04 |
| .....cggucuaaggcgguggaucg.....                                                                                  | 1 | 0 | S04 |
| .....aggcgguggaucCuuugcaguggu.....                                                                              | 1 | 1 | S04 |

Provisional ID : chrC08\_2299260  
 Score total : 0.7  
 Score for star read(s) : -1.3  
 Score for read counts : 0  
 Score for mfe : 2  
 Score for randfold : 0  
 Score for cons. seed :  
 Total read count : 116  
 Mature read count : 95  
 Loop read count : 0  
 Star read count : 21

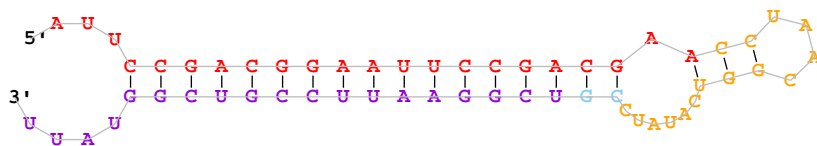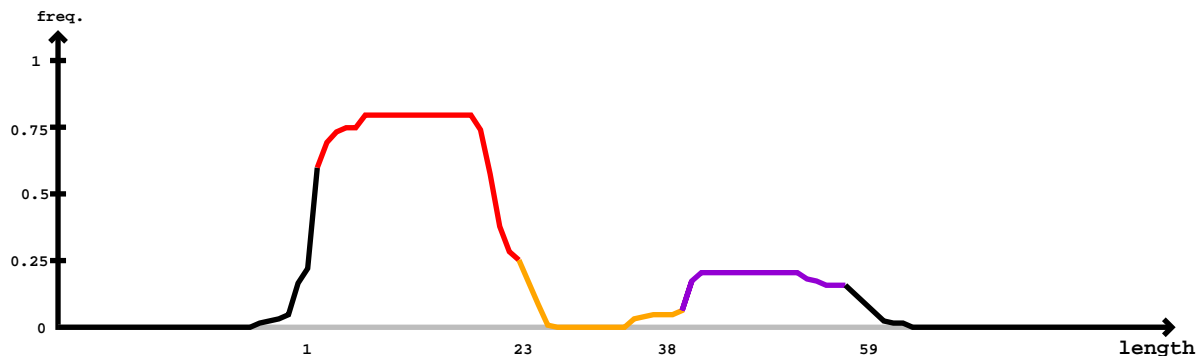

**Mature** **Star**

| 5' -                                                                                                                         | obs | reads | mm  | sample |
|------------------------------------------------------------------------------------------------------------------------------|-----|-------|-----|--------|
| aaauugcuuacggcaguccgacgau <u>auuccgacggaauuccgacgaaccuaacggucauauuccgucggaauuccgucgguuuuu</u> uccuaucucaauggcuaaaaaacggucaua | -3' |       |     |        |
| aaauugcuuacggcaguccgacgau <u>auuccgacggaauuccgacgaaccuaacggucauauuccgucggaauuccgucgguuuuu</u> uccuaucucaauggcuaaaaaacggucaua | exp |       |     |        |
| ..((((.....)))).(((((.....((((((((((((((((((((.....)))))))))))))))))))).).....((((.....)))).                                 |     |       |     |        |
| .....Aacgauauuccgacggaauuccga.....                                                                                           | 1   | 1     | S03 |        |
| .....gauauuccgacggaauuccgaAga.....                                                                                           | 1   | 1     | S03 |        |
| .....auauuccgacggaauuccg.....                                                                                                | 4   | 0     | S03 |        |
| .....auGuuccgacggaauuccg.....                                                                                                | 1   | 1     | S03 |        |
| .....auauuccgacggaauuccga.....                                                                                               | 2   | 0     | S03 |        |
| .....auauuccgacggGauuccga.....                                                                                               | 1   | 1     | S03 |        |
| .....auauuccgacggaauuccgacg.....                                                                                             | 1   | 0     | S03 |        |
| .....uauuccgacggaauuccUa.....                                                                                                | 1   | 1     | S03 |        |
| .....uauuccgacggaauuccgac.....                                                                                               | 1   | 0     | S03 |        |
| .....auuccgacggaauuccga.....                                                                                                 | 8   | 0     | S03 |        |
| .....auuccgacggaauuccgac.....                                                                                                | 6   | 0     | S03 |        |
| .....auuccgacggaauuccgacg.....                                                                                               | 1   | 0     | S03 |        |
| .....auuccgacggaauuccgacUa.....                                                                                              | 1   | 1     | S03 |        |
| .....auuccgacggaauuccgacgCa.....                                                                                             | 8   | 1     | S03 |        |
| .....uuccgacggaauuccgac.....                                                                                                 | 3   | 0     | S03 |        |
| .....uuccgacggaauuccgacg.....                                                                                                | 1   | 0     | S03 |        |
| .....uuccgacggaauuccgacgaac.....                                                                                             | 1   | 0     | S03 |        |
| .....uuccgaUggauuccgacgaacc.....                                                                                             | 1   | 1     | S03 |        |
| .....uccgacggaauuccgacg.....                                                                                                 | 1   | 0     | S03 |        |
| .....uccgacggaauuccgacgaacc.....                                                                                             | 1   | 0     | S03 |        |
| .....gacggaauuccgacgaac.....                                                                                                 | 2   | 0     | S03 |        |
| .....uauuccgucggaauuccgu.....                                                                                                | 1   | 0     | S03 |        |
| .....ucggaauuccgucgguuu.....                                                                                                 | 1   | 0     | S03 |        |
| .....ucggaauuccgucgguuuG.....                                                                                                | 1   | 1     | S03 |        |
| .....ucggaauCccgucgguuu.....                                                                                                 | 2   | 1     | S03 |        |
| .....ucggaauuccgucgguuu.....                                                                                                 | 2   | 0     | S03 |        |
| .....ucggaauuccgucgguuuuu.....                                                                                               | 1   | 0     | S03 |        |
| .....ucggaauuccgucgguuuuu.....                                                                                               | 1   | 0     | S03 |        |
| .....cggauuccgucgguuu.....                                                                                                   | 1   | 0     | S03 |        |
| .....gacgauauuccgacgAauuccga.....                                                                                            | 1   | 1     | S04 |        |
| .....acgauauuccgacggaauuccgac.....                                                                                           | 1   | 0     | S04 |        |
| .....cgaauuccgacggaauuccgac.....                                                                                             | 1   | 0     | S04 |        |

Mature

Star

| Sequence                            | Mature Count | Star Count | Label |
|-------------------------------------|--------------|------------|-------|
| .....Nauauccgacggaauuccg.....       | 1            | 1          | S04   |
| .....auauccgacggaauuccga.....       | 2            | 0          | S04   |
| .....auauccgacggaauuccgac.....      | 2            | 0          | S04   |
| .....auauccgacggaauuccgacC.....     | 1            | 1          | S04   |
| .....auauccgacggaauuccgacgaU.....   | 1            | 1          | S04   |
| .....uGuuccgacggaauuccg.....        | 1            | 1          | S04   |
| .....uauuccgacggaauuccga.....       | 3            | 0          | S04   |
| .....uauuccgacggaauuccgacC.....     | 1            | 1          | S04   |
| .....auuccgacggaauuccga.....        | 2            | 0          | S04   |
| .....auuccgacggaauuccgac.....       | 8            | 0          | S04   |
| .....auuccgacggaauuccgacC.....      | 4            | 1          | S04   |
| .....auuccgacggaauuccgacga.....     | 1            | 0          | S04   |
| .....auuccgacggaauuccgacgCa.....    | 5            | 1          | S04   |
| .....auuccgacggaauuccgacgaac.....   | 1            | 0          | S04   |
| .....auuccgacggaauuccgacgaacc.....  | 1            | 0          | S04   |
| .....auuccgacggaauuccgacgaaccA..... | 2            | 1          | S04   |
| .....uuccgacggaauuccgac.....        | 3            | 0          | S04   |
| .....uuccgacggaauuccgacg.....       | 1            | 0          | S04   |
| .....uuccgacggaauuccgacgaU.....     | 1            | 1          | S04   |
| .....uuccgacggaauuccgacgaac.....    | 1            | 0          | S04   |
| .....uccgacggaauuccgacg.....        | 1            | 0          | S04   |
| .....uccgacggaauuccgacgaac.....     | 1            | 0          | S04   |
| .....uccgacggaauuccgacgaacU.....    | 1            | 1          | S04   |
| .....ccgacggaauuccgacga.....        | 1            | 0          | S04   |
| .....ccgacggaauuccgacgaacc.....     | 1            | 0          | S04   |
| .....gacggaauuccgacgaacc.....       | 1            | 0          | S04   |
| .....gacggaauuccgacgGacc.....       | 2            | 1          | S04   |
| .....gacggaauuccgacgaaccG.....      | 1            | 1          | S04   |
| .....uauccgucggaauuccgu.....        | 2            | 0          | S04   |
| .....uauccgucggaauuccgucU.....      | 1            | 1          | S04   |
| .....auccgucggaauuccguA.....        | 1            | 1          | S04   |
| .....uccgucggaauuccgucU.....        | 1            | 1          | S04   |
| .....gucUgaaauccgucggaauuuucc.....  | 1            | 1          | S04   |
| .....gucAgaauccgucggaauuuucc.....   | 1            | 1          | S04   |
| .....ucggaauuccgucggaau.....        | 2            | 0          | S04   |
| .....ucggaauuccgucggaUuu.....       | 1            | 1          | S04   |
| .....ucggaauuccgucggauu.....        | 1            | 0          | S04   |
| .....ucggaauuccgucggauuu.....       | 2            | 0          | S04   |
| .....cggaauCccgucggauu.....         | 1            | 1          | S04   |
| .....cggaauuccgucggauu.....         | 1            | 0          | S04   |
| .....cggaauuccgucggauuu.....        | 1            | 0          | S04   |

Provisional ID : chrC08\_2320561  
 Score total : 1.1  
 Score for star read(s) : -1.3  
 Score for read counts : 0  
 Score for mfe : 2.4  
 Score for randfold : 0  
 Score for cons. seed :  
 Total read count : 29  
 Mature read count : 26  
 Loop read count : 0  
 Star read count : 3

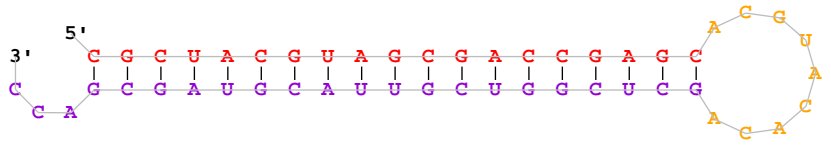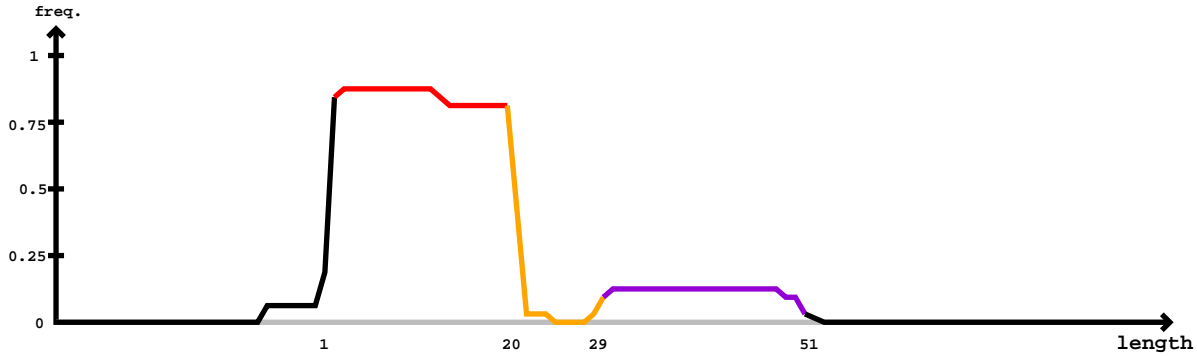

**Mature Star**

| 5' -                                                                                                                | -3' | obs | exp | reads | mm | sample |
|---------------------------------------------------------------------------------------------------------------------|-----|-----|-----|-------|----|--------|
| agcgaccgagcacgcacaugacucggucgcuaacguagcgaccgagcacguaacacagcucggucguuacguagcgaccgaacucuccagaccgucgaucgacacgaauccaugc |     |     |     |       |    |        |
| agcgaccgagcacgcacaugacucggucgcuaacguagcgaccgagcacguaacacagcucggucguuacguagcgaccgaacucuccagaccgucgaucgacacgaauccaugc |     |     |     | 1     | 1  | S03    |
| .....acucggucgcuacguGgc.....                                                                                        |     |     |     | 3     | 0  | S03    |
| .....ucgcuacguagcgaccgagc.....                                                                                      |     |     |     | 17    | 0  | S03    |
| .....cgcuacguagcgaccgagc.....                                                                                       |     |     |     | 2     | 0  | S03    |
| .....cgcuacguagcgaccgagcaca.....                                                                                    |     |     |     | 1     | 0  | S03    |
| .....cgcuacguagcgaccgagcacgu.....                                                                                   |     |     |     | 1     | 0  | S03    |
| .....gcuacguagcgaccgagc.....                                                                                        |     |     |     | 1     | 0  | S03    |
| .....agcucggucguuacguagcgac.....                                                                                    |     |     |     | 1     | 0  | S03    |
| .....gcucggucguuacguagcgac.....                                                                                     |     |     |     | 1     | 0  | S03    |
| .....gcucggucguuacguagcgacA.....                                                                                    |     |     |     | 1     | 1  | S03    |
| .....acucggucgcuacguagcg.....                                                                                       |     |     |     | 1     | 0  | S04    |
| .....ucgcuacguagcgaccgagc.....                                                                                      |     |     |     | 1     | 0  | S04    |
| .....cgcuacguagcgaccgagc.....                                                                                       |     |     |     | 1     | 0  | S04    |
| .....cucggucguuacguagcg.....                                                                                        |     |     |     | 1     | 0  | S04    |

Provisional ID : chrC08\_2324612  
 Score total : 0.5  
 Score for star read(s) : -1.3  
 Score for read counts : 0  
 Score for mfe : 1.8  
 Score for randfold : 0  
 Score for cons. seed :  
 Total read count : 13  
 Mature read count : 13  
 Loop read count : 0  
 Star read count : 0

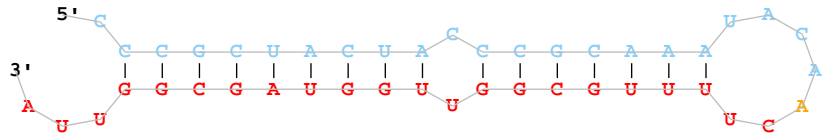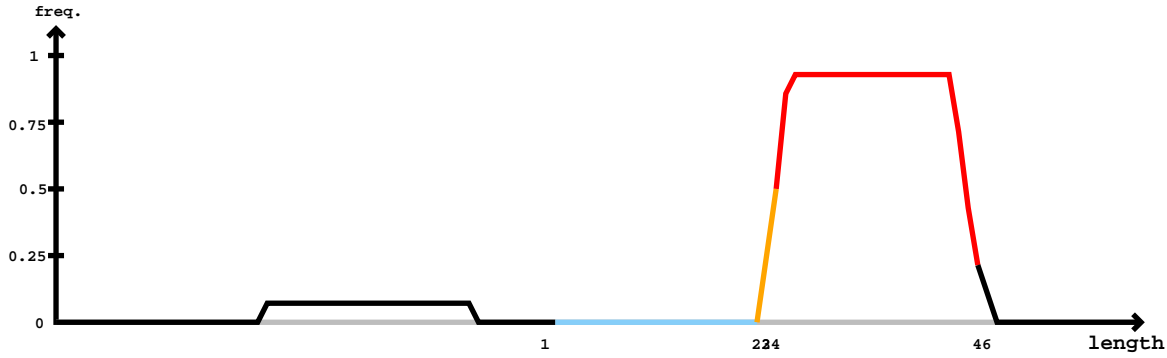

Star                      Mature

| 5' -                                                                        | Star | Mature                            | -3'               | exp | reads | mm | sample |
|-----------------------------------------------------------------------------|------|-----------------------------------|-------------------|-----|-------|----|--------|
| uuuuccaccacucgauucaauaaaaguugaauaagggccugagugguuuccccgcuaacuaccgcgcaaaauaca |      | cuuuugcggguugguagcgggu            | aaaaacguuucgaaaca |     | 1     | 1  | S03    |
| .....aaaaguugaauaagggccugaU.....                                            |      | .....cuuuugcggguugguagcgggu.....  |                   |     | 1     | 0  | S03    |
|                                                                             |      | .....cuuuugcggguugguagcggC.....   |                   |     | 1     | 1  | S03    |
|                                                                             |      | .....cuuuugcggguugguagcgguu.....  |                   |     | 2     | 0  | S03    |
|                                                                             |      | .....cuuuugcggguugguagcgguaa..... |                   |     | 3     | 0  | S03    |
|                                                                             |      | .....uuuugcggguugguagcggg.....    |                   |     | 2     | 0  | S03    |
|                                                                             |      | .....uuuugcggguugguagcgggu.....   |                   |     | 1     | 0  | S03    |
|                                                                             |      | .....uuuugcggguugguagcgggu.....   |                   |     | 1     | 0  | S03    |
|                                                                             |      | .....uuuugcggguugguagcggg.....    |                   |     | 1     | 0  | S04    |
|                                                                             |      | .....uuuugcggguugguagcgggu.....   |                   |     | 1     | 0  | S04    |



Star

Mature

|                                                                                                                                                                             |   |   |     |
|-----------------------------------------------------------------------------------------------------------------------------------------------------------------------------|---|---|-----|
| uauuccgacgaa <u>cuuugggcgucg</u> gaa <u>uuaccgacggacgugguu</u> cgucgga <u>aua</u> uaccgacgaa <u>cau</u> uauaccgucgga <u>uuu</u> accgacaa <u>cccca</u> uuuccgucgga <u>uu</u> |   |   |     |
| .....auauaccgucAga <u>uuuu</u> accgac.....                                                                                                                                  | 1 | 1 | S04 |
| .....uauaccgucgga <u>uuuu</u> acc.....                                                                                                                                      | 1 | 0 | S04 |
| .....auaccgucgga <u>uuuu</u> acc.....                                                                                                                                       | 1 | 0 | S04 |
| .....uaccgucgga <u>uuuu</u> accg.....                                                                                                                                       | 1 | 0 | S04 |
| .....accgucgga <u>uuuu</u> accg.....                                                                                                                                        | 1 | 0 | S04 |





Star

Mature

|                                  |                       |                       |                                      |   |   |     |
|----------------------------------|-----------------------|-----------------------|--------------------------------------|---|---|-----|
| aucaaaauuuuaaacggaaucaaaagccagaa | ccucguaguccagugguacua | ucuccucuuggggaggggaag | ucggcuguuucgacucgcggggaggggagacgu    | 1 | 1 | S03 |
| .....                            | .....                 | .....                 | .....cggcuguuucgacucgcggggUg.....    | 1 | 1 | S03 |
| .....                            | .....                 | .....                 | .....cggcugGucgacucgcggggag.....     | 1 | 1 | S03 |
| .....                            | .....                 | .....                 | .....cggcuguuucgacucgcgggggaC.....   | 1 | 1 | S03 |
| .....                            | .....                 | .....                 | .....cggcuguuucgacucgUggggag.....    | 1 | 1 | S03 |
| .....                            | .....                 | .....                 | .....cggcuguuucgacucgcgggggaA.....   | 2 | 1 | S03 |
| .....                            | .....                 | .....                 | .....cggcuguuucgacucgcggggGg.....    | 1 | 1 | S03 |
| .....                            | .....                 | .....                 | .....cCgcuguuucgacucgcggggagg.....   | 1 | 1 | S03 |
| .....                            | .....                 | .....                 | .....cggcuguuucgacucgcggggagU.....   | 2 | 1 | S03 |
| .....                            | .....                 | .....                 | .....cggcuguuucgGcucgcggggaggg.....  | 2 | 1 | S03 |
| .....                            | .....                 | .....                 | .....cggcuguuucgacuUgcggggaggg.....  | 1 | 1 | S03 |
| .....                            | .....                 | .....                 | .....cggcuguCcgacucgcggggaggg.....   | 1 | 1 | S03 |
| .....                            | .....                 | .....                 | .....ggcuguuucgacucgcgggU.....       | 1 | 1 | S03 |
| .....                            | .....                 | .....                 | .....cuguucgacucgcggggC.....         | 1 | 1 | S03 |
| .....                            | .....                 | .....                 | .....cuUuucgacucgcggggagggg.....     | 1 | 1 | S03 |
| .....                            | .....                 | .....                 | .....cuguucgacCcgcggggaggggg.....    | 1 | 1 | S03 |
| .....                            | .....                 | .....                 | .....cuguucgacucgcggggaggggA.....    | 1 | 1 | S03 |
| .....                            | .....                 | .....                 | .....cuguucgacucgcggggagggggG.....   | 1 | 1 | S03 |
| .....                            | .....                 | .....                 | .....cuguucgacucgcggggaggggggaA..... | 1 | 1 | S03 |
| .....                            | .....                 | .....                 | .....Nguucgacucgcggggagggg.....      | 1 | 1 | S03 |
| .....                            | .....                 | .....                 | .....uucgacucgcggggaggggggaU.....    | 1 | 1 | S03 |
| .....                            | .....                 | .....                 | .....uucgacucgcggggaggggggaga.....   | 1 | 0 | S03 |
| .....                            | .....                 | .....                 | .....ucgacucgcggggagggggagacg.....   | 1 | 0 | S03 |
| .....                            | .....                 | .....                 | .....ucgacucgcggggagggggagacA.....   | 1 | 1 | S03 |
| .....                            | .....                 | .....                 | .....Gccucguaguccagugguacu.....      | 1 | 1 | S04 |
| .....                            | .....                 | .....                 | .....cucguaguccagugguacuU.....       | 1 | 1 | S04 |
| .....                            | .....                 | .....                 | .....ggaUgucggcuguuucgacucgc.....    | 1 | 1 | S04 |
| .....                            | .....                 | .....                 | .....ggaagucggcuguuucgacucgcgg.....  | 1 | 0 | S04 |
| .....                            | .....                 | .....                 | .....ucggcuguuucgacucgcgggA.....     | 2 | 1 | S04 |
| .....                            | .....                 | .....                 | .....ucggcuguuucgacucgcUggga.....    | 1 | 1 | S04 |
| .....                            | .....                 | .....                 | .....ucggcuguuucgacucgcgggU.....     | 2 | 1 | S04 |
| .....                            | .....                 | .....                 | .....ucggcuguuucgacucgcggggagA.....  | 4 | 1 | S04 |
| .....                            | .....                 | .....                 | .....ucggcuguuucgacucgcggggagU.....  | 1 | 1 | S04 |
| .....                            | .....                 | .....                 | .....ucggcuguuucgacucgcggggagga..... | 1 | 1 | S04 |
| .....                            | .....                 | .....                 | .....cggcuguuucgacucgcgggUa.....     | 1 | 1 | S04 |
| .....                            | .....                 | .....                 | .....cggcuguuucgacucgcggggC.....     | 1 | 1 | S04 |
| .....                            | .....                 | .....                 | .....cggcuguuucgacucgcggggG.....     | 1 | 1 | S04 |
| .....                            | .....                 | .....                 | .....cggcuguuucgCucgcggggag.....     | 1 | 1 | S04 |
| .....                            | .....                 | .....                 | .....cAgcuguuucgacucgcggggag.....    | 1 | 1 | S04 |
| .....                            | .....                 | .....                 | .....cggcuguuucgacucgcgggggaA.....   | 2 | 1 | S04 |
| .....                            | .....                 | .....                 | .....cggcuguuucAacucgcggggagg.....   | 1 | 1 | S04 |
| .....                            | .....                 | .....                 | .....cAgcuguuucgacucgcggggagg.....   | 1 | 1 | S04 |
| .....                            | .....                 | .....                 | .....cggcuguuucgacucgcggggagU.....   | 3 | 1 | S04 |
| .....                            | .....                 | .....                 | .....cggcuguuucgacucgcggggagA.....   | 1 | 1 | S04 |
| .....                            | .....                 | .....                 | .....cUgcuguuucgacucgcggggaggg.....  | 1 | 1 | S04 |
| .....                            | .....                 | .....                 | .....cggcuguuucgacucgcggggagga.....  | 3 | 1 | S04 |
| .....                            | .....                 | .....                 | .....cggcuguuucgacCcgcggggaggg.....  | 1 | 1 | S04 |
| .....                            | .....                 | .....                 | .....cggcuguuucgacucgcggggagU.....   | 1 | 1 | S04 |
| .....                            | .....                 | .....                 | .....cggcuguuucgacucgcgggAaggg.....  | 1 | 1 | S04 |
| .....                            | .....                 | .....                 | .....cuguucgacucgcggggagU.....       | 1 | 1 | S04 |
| .....                            | .....                 | .....                 | .....cuguucgacucgcggggagA.....       | 2 | 1 | S04 |
| .....                            | .....                 | .....                 | .....cuguucgacucgcggggagggU.....     | 1 | 1 | S04 |
| .....                            | .....                 | .....                 | .....cuguucgacucgcggggagggCg.....    | 1 | 1 | S04 |
| .....                            | .....                 | .....                 | .....cuguucgacucgcggggaggggU.....    | 1 | 1 | S04 |
| .....                            | .....                 | .....                 | .....uUuucgacucgcggggag.....         | 1 | 1 | S04 |
| .....                            | .....                 | .....                 | .....uguucgacucgcggggagA.....        | 1 | 1 | S04 |
| .....                            | .....                 | .....                 | .....uguucgacucgcggggagC.....        | 1 | 1 | S04 |
| .....                            | .....                 | .....                 | .....guucgacucgUggggagggggaga.....   | 1 | 1 | S04 |
| .....                            | .....                 | .....                 | .....cgacucgcggggagggggagaga.....    | 1 | 0 | S04 |
| .....                            | .....                 | .....                 | .....cgacucgcggggagggggagacgu.....   | 1 | 0 | S04 |



Provisional ID : chrC08\_2341054  
 Score total : 0.5  
 Score for star read(s) : -1.3  
 Score for read counts : 0  
 Score for mfe : 1.8  
 Score for randfold : 0  
 Score for cons. seed :  
 Total read count : 61  
 Mature read count : 58  
 Loop read count : 3  
 Star read count : 0

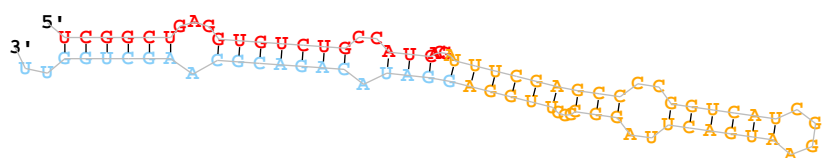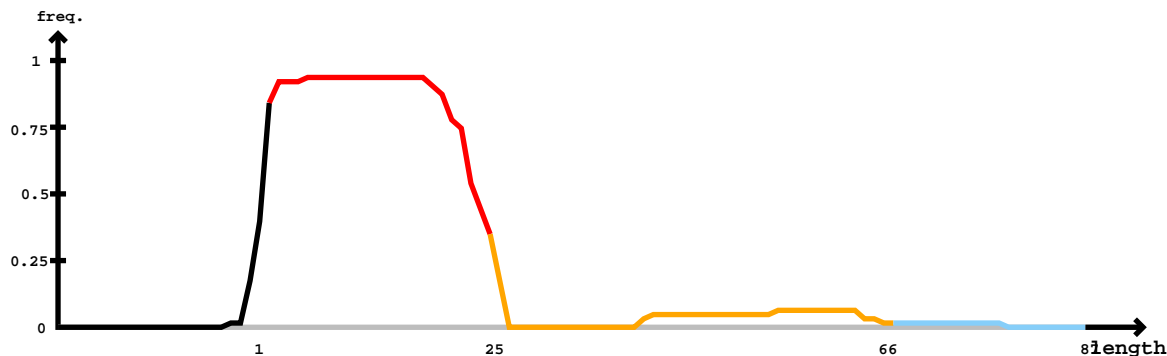

**Mature**

**Star**

| 5'                                                                                                           | 3' | exp | reads | mm | sample |
|--------------------------------------------------------------------------------------------------------------|----|-----|-------|----|--------|
| aacaauuuuaaacgggcccucggcugaggugucugccaucacgaauuucgagcccggucaucggaaugacuuaggcccuuggaggauacagacgaagcugguuccggg |    |     |       |    |        |
| ..... ((((((((.....))))))))))))))))))))).....                                                                |    |     |       |    |        |
| ..... gAaccucggcugaggugucugccau.....                                                                         |    |     | 1     | 1  | S03    |
| ..... ccucggcugaggugucugc.....                                                                               |    |     | 1     | 0  | S03    |
| ..... ccucggcugaggugucugA.....                                                                               |    |     | 1     | 1  | S03    |
| ..... ccucggcugaggugucugcca.....                                                                             |    |     | 2     | 0  | S03    |
| ..... ccucggcugaggugucugccau.....                                                                            |    |     | 1     | 0  | S03    |
| ..... ccucggcugaggugucugccauc.....                                                                           |    |     | 3     | 0  | S03    |
| ..... cucggcugaggugucugcc.....                                                                               |    |     | 1     | 0  | S03    |
| ..... cucggcugaggugucugcca.....                                                                              |    |     | 1     | 0  | S03    |
| ..... cucggcugaggugucugccauA.....                                                                            |    |     | 1     | 1  | S03    |
| ..... cucggcugaggugucugccauU.....                                                                            |    |     | 1     | 1  | S03    |
| ..... cucggcugaggugucugccauc.....                                                                            |    |     | 1     | 0  | S03    |
| ..... cucggcugaggugucugccauca.....                                                                           |    |     | 1     | 0  | S03    |
| ..... cucggcugaggGgucugccaucac.....                                                                          |    |     | 1     | 1  | S03    |
| ..... cucggcugaggugucugccaucac.....                                                                          |    |     | 2     | 0  | S03    |
| ..... ucggcugaggugucugccauU.....                                                                             |    |     | 1     | 1  | S03    |
| ..... ucggcugaggugucugccauca.....                                                                            |    |     | 3     | 0  | S03    |
| ..... ucggcugaggugucugccaucG.....                                                                            |    |     | 1     | 1  | S03    |
| ..... ucggAugaggugucugccauca.....                                                                            |    |     | 1     | 1  | S03    |
| ..... ucggcugaggugucugccaucaU.....                                                                           |    |     | 1     | 1  | S03    |
| ..... ucggcugaggugucugccaucacA.....                                                                          |    |     | 1     | 1  | S03    |
| ..... ucggcugaggugucugccaucacg.....                                                                          |    |     | 9     | 0  | S03    |
| ..... cggcugaggugucugcca.....                                                                                |    |     | 1     | 0  | S03    |
| ..... cggcugaggugucugccauc.....                                                                              |    |     | 1     | 0  | S03    |
| ..... cggcugaggugucugccaucacga.....                                                                          |    |     | 2     | 0  | S03    |
| ..... cugaggugucugccaucacga.....                                                                             |    |     | 1     | 0  | S03    |
| ..... caucggaaugacuuaggcccuu.....                                                                            |    |     | 1     | 0  | S03    |
| ..... aucggaugacuuaggcccuugg.....                                                                            |    |     | 1     | 0  | S03    |
| ..... ccucggcugaggugucugccauA.....                                                                           |    |     | 1     | 1  | S04    |
| ..... ccucggcugaggugucugccauc.....                                                                           |    |     | 1     | 0  | S04    |
| ..... cucggcugaggugucugcc.....                                                                               |    |     | 1     | 0  | S04    |
| ..... cucggcugaggugucugcca.....                                                                              |    |     | 2     | 0  | S04    |
| ..... cucggcugaggugucugccaucac.....                                                                          |    |     | 1     | 0  | S04    |
| ..... cucggcugaggugucugccaucA.....                                                                           |    |     | 1     | 1  | S04    |

**Mature**

**Star**

|                      |                         |                                                                    |   |   |     |
|----------------------|-------------------------|--------------------------------------------------------------------|---|---|-----|
| aacauguuuaaaaccgggcc | ucggcugaggugucgccauc    | gaauucgagccccggucaucggaaugacuaggcccuuggaggauacagacgcaagcuggguccggg |   |   |     |
| .....                | ucggcugaggugucgccauc    | .....                                                              | 2 | 0 | S04 |
| .....                | ucggcugaggugucgccaU     | .....                                                              | 1 | 1 | S04 |
| .....                | ucggcugaggugucgccaucac  | .....                                                              | 1 | 0 | S04 |
| .....                | ucggcugaggugucgccaucacg | .....                                                              | 7 | 0 | S04 |
| .....                | cggcugaggugucgccaucaga  | .....                                                              | 1 | 0 | S04 |
| .....                | .....                   | cGucggaaugacuaggcccuu                                              | 1 | 1 | S04 |
| .....                | .....                   | aggcccuuggaggauacagacgc                                            | 1 | 0 | S04 |

Provisional ID : chrC08\_2341430  
 Score total : 128.5  
 Score for star read(s) : 3.9  
 Score for read counts : 125.5  
 Score for mfe : -0.8  
 Score for randfold : 0  
 Score for cons. seed :  
 Total read count : 258  
 Mature read count : 252  
 Loop read count : 4  
 Star read count : 2

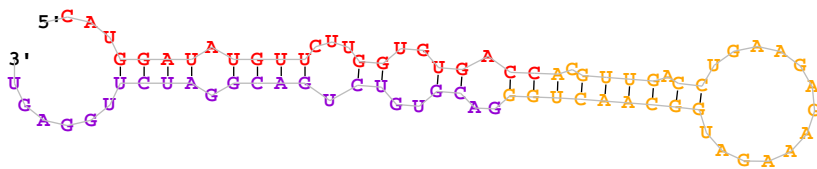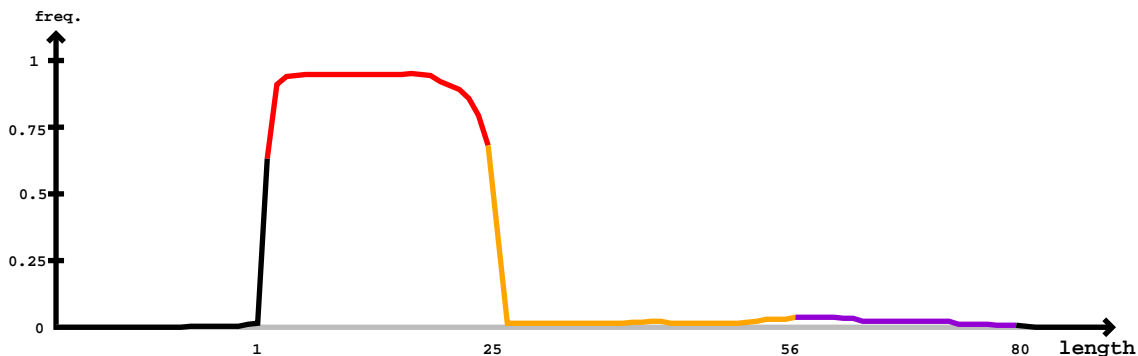

**Mature**

**Star**

| 5' -                                                                                                                             | 3' obs | reads | mm | sample |
|----------------------------------------------------------------------------------------------------------------------------------|--------|-------|----|--------|
| gcguaauuguuuaaaccuc <b>cauggauauguuc<u>u</u>ggugugaccacguugaccugaagagaaagauaggcaacugggacgugucugacggau<u>cu</u>ggaguugguucgaa</b> | exp    |       |    |        |
| gcguaauuguuuaaaccuc <b>cauggauauguuc<u>u</u>ggugugaccacguugaccugaagagaaagauaggcaacugggacgugucugacggau<u>cu</u>ggaguugguucgaa</b> |        | 1     | 0  | S03    |
| .....(((.....(((.....(((.....(((.....(((.....(((.....(((.....))))))))))))))))))))))))))))))))))))))))))))))))))                  |        | 1     | 1  | S03    |
| .....a <u>ua</u> accuccauggauauguuc <u>u</u> gg.....                                                                             |        | 1     | 1  | S03    |
| .....uGcauggauauguuc <u>u</u> gg.....                                                                                            |        | 1     | 0  | S03    |
| .....Gcauggauauguuc <u>u</u> gg.....                                                                                             |        | 1     | 1  | S03    |
| .....cauggauauguuc <u>u</u> gg.....                                                                                              |        | 1     | 1  | S03    |
| .....cauggauauguuc <u>u</u> ggUu.....                                                                                            |        | 1     | 1  | S03    |
| .....cauggauauguuc <u>u</u> ggAug.....                                                                                           |        | 1     | 1  | S03    |
| .....cauggauauguuc <u>u</u> ggAuga.....                                                                                          |        | 7     | 1  | S03    |
| .....cauggauauguuc <u>u</u> ggAugac.....                                                                                         |        | 8     | 1  | S03    |
| .....cauggauauguuc <u>u</u> ggAugacc.....                                                                                        |        | 65    | 1  | S03    |
| .....auggauauguuc <u>u</u> ggAu.....                                                                                             |        | 1     | 1  | S03    |
| .....auggauauguuc <u>u</u> ggAug.....                                                                                            |        | 1     | 1  | S03    |
| .....auggauauguuc <u>u</u> ggAuga.....                                                                                           |        | 3     | 1  | S03    |
| .....auggauauguuc <u>u</u> ggAugac.....                                                                                          |        | 7     | 1  | S03    |
| .....auggauauguuc <u>u</u> ggAugacc.....                                                                                         |        | 19    | 1  | S03    |
| .....auggauauguuc <u>u</u> ggugaccU.....                                                                                         |        | 1     | 1  | S03    |
| .....auggauauguuc <u>u</u> ggAugacca.....                                                                                        |        | 7     | 1  | S03    |
| .....uggauauguuc <u>u</u> ggAug.....                                                                                             |        | 1     | 1  | S03    |
| .....uggauauguuc <u>u</u> ggAugac.....                                                                                           |        | 1     | 1  | S03    |
| .....uggauauguuc <u>u</u> ggAugacc.....                                                                                          |        | 2     | 1  | S03    |
| .....ggugugaccacguugaccugaaga.....                                                                                               |        | 1     | 0  | S03    |
| .....ccacguugaccugaagGg.....                                                                                                     |        | 1     | 1  | S03    |
| .....agaaagauaggcaacugggacgu.....                                                                                                |        | 1     | 0  | S03    |
| .....gaaagauaggcaacugggacgugu.....                                                                                               |        | 1     | 0  | S03    |
| .....aaagauaggcaacugggacgugu.....                                                                                                |        | 1     | 0  | S03    |
| .....acugggacgugucugacggau.....                                                                                                  |        | 1     | 0  | S03    |
| .....cugggacgugucugacggauG.....                                                                                                  |        | 1     | 1  | S03    |
| .....ugggacgugucugacggau.....                                                                                                    |        | 1     | 0  | S03    |
| .....ugggacgugucugacggau <u>cu</u> gg.....                                                                                       |        | 1     | 0  | S03    |
| .....gacgugucugacggau <u>cu</u> ggagu.....                                                                                       |        | 1     | 0  | S03    |
| .....uGcauggauauguuc <u>u</u> gg.....                                                                                            |        | 1     | 1  | S04    |
| .....cauggauauguuc <u>u</u> gg.....                                                                                              |        | 2     | 0  | S04    |
| .....cauggauauguuc <u>u</u> ggG.....                                                                                             |        | 1     | 1  | S04    |

Mature

Star

|                                   |                                   |                                                                 |                                  |                                 |                                  |
|-----------------------------------|-----------------------------------|-----------------------------------------------------------------|----------------------------------|---------------------------------|----------------------------------|
| gcguaauuguuuaaaccuc               | cauggauauguucuggugugacca          | cguugaccugaagagaaagauaggcaacugggacgugucugacggauucuggagugguucgaa |                                  |                                 |                                  |
| .....cauggauauguucugguA.....      | .....cauggauauguucugguU.....      | .....cauggauauguucugguAu.....                                   | .....cauggauauguucugguAug.....   | .....cauggauauguucugguAuga..... | .....cauggauauguucugguAugac..... |
| .....cauggauauguucugguAugacc..... | .....auggauauguucugguA.....       | .....auggauauguucugguAu.....                                    | .....auggauauguucugguAug.....    | .....auggauauguucugguAuga.....  | .....auggauauguucugguAugac.....  |
| .....auggauauguucugguAugacca..... | .....uggauauguucugguAugac.....    | .....uggauauguucugguAugacc.....                                 | .....uggauauguucugguAugacca..... | .....ggauauguucugguAugacca..... | .....gauauguucugguAugacca.....   |
| .....cacguugaccugaagGgaa.....     | .....aaagauaggcaacugggacgugu..... | .....gacgugucugacggauucuggagu.....                              |                                  |                                 |                                  |
|                                   |                                   |                                                                 | 1                                | 1                               | S04                              |
|                                   |                                   |                                                                 | 1                                | 1                               | S04                              |
|                                   |                                   |                                                                 | 1                                | 1                               | S04                              |
|                                   |                                   |                                                                 | 3                                | 1                               | S04                              |
|                                   |                                   |                                                                 | 4                                | 1                               | S04                              |
|                                   |                                   |                                                                 | 9                                | 1                               | S04                              |
|                                   |                                   |                                                                 | 60                               | 1                               | S04                              |
|                                   |                                   |                                                                 | 2                                | 1                               | S04                              |
|                                   |                                   |                                                                 | 1                                | 1                               | S04                              |
|                                   |                                   |                                                                 | 3                                | 1                               | S04                              |
|                                   |                                   |                                                                 | 4                                | 1                               | S04                              |
|                                   |                                   |                                                                 | 5                                | 1                               | S04                              |
|                                   |                                   |                                                                 | 10                               | 1                               | S04                              |
|                                   |                                   |                                                                 | 10                               | 1                               | S04                              |
|                                   |                                   |                                                                 | 2                                | 1                               | S04                              |
|                                   |                                   |                                                                 | 1                                | 1                               | S04                              |
|                                   |                                   |                                                                 | 1                                | 1                               | S04                              |
|                                   |                                   |                                                                 | 1                                | 1                               | S04                              |
|                                   |                                   |                                                                 | 1                                | 1                               | S04                              |
|                                   |                                   |                                                                 | 2                                | 1                               | S04                              |
|                                   |                                   |                                                                 | 1                                | 0                               | S04                              |
|                                   |                                   |                                                                 | 1                                | 0                               | S04                              |







Provisional ID : chrC08\_2356729  
 Score total : 0.9  
 Score for star read(s) : -1.3  
 Score for read counts : 0  
 Score for mfe : 2.2  
 Score for randfold : 0  
 Score for cons. seed :  
 Total read count : 5177  
 Mature read count : 4004  
 Loop read count : 1160  
 Star read count : 13

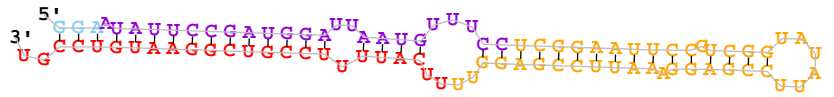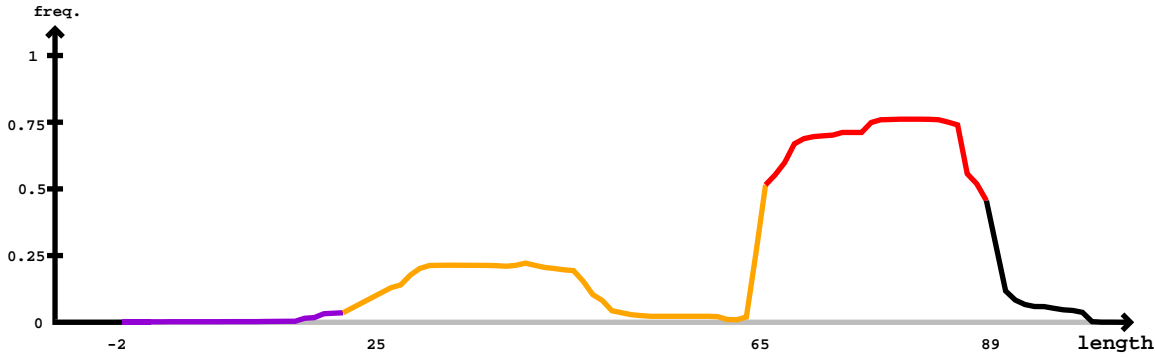

|                                                                                                                    |     | Star  | Mature |        |     |  |  |
|--------------------------------------------------------------------------------------------------------------------|-----|-------|--------|--------|-----|--|--|
| 5'                                                                                                                 | 3'  | reads | mm     | sample | obs |  |  |
| uccucggaauauuccgauggauuaauguuuccucggaauuccgucgguauauuccgaggaaaauuccgagguuuucauuuuuccgucggaauuguccgucagaauaccuauugu | -3' |       |        |        | exp |  |  |
| ((...(((.....)))))))))))))))))))))))))))))))))))))))))))))))))))))))))))))))))))))).....                           |     |       |        |        |     |  |  |
| .....auauAaccgauggauuauguuu.....                                                                                   |     | 1     | 1      | S03    |     |  |  |
| .....auauuccgauggauuGauguuucc.....                                                                                 |     | 4     | 1      | S03    |     |  |  |
| .....auuaauguuucccggauucG.....                                                                                     |     | 1     | 1      | S03    |     |  |  |
| .....uuuaauguuucccggauuccguc.....                                                                                  |     | 1     | 0      | S03    |     |  |  |
| .....auguuucccggauuccguc.....                                                                                      |     | 4     | 0      | S03    |     |  |  |
| .....auguuucccggauuccgucg.....                                                                                     |     | 1     | 0      | S03    |     |  |  |
| .....auguuucccggauuccgucggG.....                                                                                   |     | 1     | 1      | S03    |     |  |  |
| .....auguuucccGagauuccgucggu.....                                                                                  |     | 1     | 1      | S03    |     |  |  |
| .....auguuucccggauuccgucggu.....                                                                                   |     | 1     | 1      | S03    |     |  |  |
| .....auguuucccggauuccgucggu.....                                                                                   |     | 22    | 0      | S03    |     |  |  |
| .....uguuucccggauucccgu.....                                                                                       |     | 1     | 0      | S03    |     |  |  |
| .....uguuucccggauuccgucg.....                                                                                      |     | 1     | 0      | S03    |     |  |  |
| .....uguuucccggGauuccgucg.....                                                                                     |     | 1     | 1      | S03    |     |  |  |
| .....uguuucccggauucccgggu.....                                                                                     |     | 2     | 0      | S03    |     |  |  |
| .....uguuucccggauuccgucggua.....                                                                                   |     | 1     | 0      | S03    |     |  |  |
| .....guuucccggauucccgu.....                                                                                        |     | 1     | 0      | S03    |     |  |  |
| .....guuucccggauucccggG.....                                                                                       |     | 1     | 1      | S03    |     |  |  |
| .....guuucccggauucccgggu.....                                                                                      |     | 4     | 0      | S03    |     |  |  |
| .....guuucccggauucccggucgguG.....                                                                                  |     | 6     | 1      | S03    |     |  |  |
| .....guuucccggauuccGgucggua.....                                                                                   |     | 1     | 1      | S03    |     |  |  |
| .....guuucccggauucccggua.....                                                                                      |     | 6     | 0      | S03    |     |  |  |
| .....guuucccggauucccgguaau.....                                                                                    |     | 10    | 0      | S03    |     |  |  |
| .....guuucccggauucccgguaG.....                                                                                     |     | 1     | 1      | S03    |     |  |  |
| .....guuucccggauucccgguaA.....                                                                                     |     | 1     | 1      | S03    |     |  |  |
| .....guuucccggauucccgguaauU.....                                                                                   |     | 1     | 1      | S03    |     |  |  |
| .....uuucccggauucccggucggu.....                                                                                    |     | 1     | 0      | S03    |     |  |  |
| .....uuucccggauucccggucggu.....                                                                                    |     | 1     | 0      | S03    |     |  |  |
| .....uuucccggauucccggucgguC.....                                                                                   |     | 1     | 1      | S03    |     |  |  |
| .....uuucccggauucccggucgguaua.....                                                                                 |     | 1     | 0      | S03    |     |  |  |
| .....uuucccggauucccggucgguauG.....                                                                                 |     | 1     | 1      | S03    |     |  |  |
| .....uuucccggauucccggucgguauau.....                                                                                |     | 1     | 0      | S03    |     |  |  |
| .....uuucccggauuccGgucgguauau.....                                                                                 |     | 1     | 1      | S03    |     |  |  |
| .....uuucccggauucccggua.....                                                                                       |     | 1     | 0      | S03    |     |  |  |

Star

Mature

|                                                                                                                 |    |   |     |
|-----------------------------------------------------------------------------------------------------------------|----|---|-----|
| uccucggaaauauuccgauggauaauguuuccucggaaauuccgucgguaauauuccgaggaaauuccgagguuuucauuuuccgucggaaugucgucagaaauaccgauu |    |   |     |
| .....ccucggaaauuccgucgguaauuu.....                                                                              | 2  | 0 | S03 |
| .....ccucggaaauuccgucgguaauuuc.....                                                                             | 12 | 0 | S03 |
| .....cucggaaauuccgucggua.....                                                                                   | 7  | 0 | S03 |
| .....cucggaaauuccgucggua.....                                                                                   | 1  | 0 | S03 |
| .....cucggaaauuccgucgguaUG.....                                                                                 | 1  | 1 | S03 |
| .....cucggaaauuccgucggua.....                                                                                   | 1  | 0 | S03 |
| .....cucggaaauuccgucgguaau.....                                                                                 | 2  | 0 | S03 |
| .....cucggaaauuccgucgguaauuu.....                                                                               | 50 | 0 | S03 |
| .....cucggaaauuccgucgguaUGuu.....                                                                               | 1  | 1 | S03 |
| .....cucggUauuccgucgguaauuu.....                                                                                | 2  | 1 | S03 |
| .....cucggaaauuccgucgguaauuuc.....                                                                              | 20 | 0 | S03 |
| .....cucggaaauuccgucgguaauuucc.....                                                                             | 14 | 0 | S03 |
| .....ucggaaauuccgucggua.....                                                                                    | 1  | 0 | S03 |
| .....ucggaaauuccgucgguaUG.....                                                                                  | 1  | 1 | S03 |
| .....ucggaaauuccgucggua.....                                                                                    | 7  | 0 | S03 |
| .....ucggaaauuccgucgguaau.....                                                                                  | 2  | 0 | S03 |
| .....ucggaaauuccgucgguaauuu.....                                                                                | 20 | 0 | S03 |
| .....ucggaaauuccgucgguaauuucc.....                                                                              | 53 | 0 | S03 |
| .....ucggaaauuccgucgguaauuucc.....                                                                              | 1  | 0 | S03 |
| .....cggaaauuccgucggua.....                                                                                     | 1  | 0 | S03 |
| .....cggaaauuccgucgguaau.....                                                                                   | 4  | 0 | S03 |
| .....cggaaauuccgucgguaauuu.....                                                                                 | 9  | 0 | S03 |
| .....cggaaauuccgucgguaauuuc.....                                                                                | 15 | 0 | S03 |
| .....cggaaauuccgucgguaauuucc.....                                                                               | 1  | 1 | S03 |
| .....cggaaauuccgucgguaauuucc.....                                                                               | 2  | 0 | S03 |
| .....ggaaauuccgucgguaauuu.....                                                                                  | 16 | 0 | S03 |
| .....ggaaauuccgucgguaauuucc.....                                                                                | 4  | 0 | S03 |
| .....ggaaauuccgucgguaauuuccga.....                                                                              | 3  | 0 | S03 |
| .....ggaaauuccgucgguaauuuccgag.....                                                                             | 4  | 0 | S03 |
| .....gaaauuccgucgguaauuu.....                                                                                   | 6  | 0 | S03 |
| .....gaaauuccgucgguaauuucc.....                                                                                 | 2  | 0 | S03 |
| .....gaaauuccgucgguaauuucc.....                                                                                 | 10 | 0 | S03 |
| .....gaaauuccgucgguaauuuccg.....                                                                                | 61 | 0 | S03 |
| .....gaaauuccgucgguaauuuccga.....                                                                               | 13 | 0 | S03 |
| .....gaaauuccgucgguaauuuccgag.....                                                                              | 6  | 0 | S03 |
| .....aaauuccgucgguaauuucc.....                                                                                  | 10 | 0 | S03 |
| .....aaauuccgucgguaauuucc.....                                                                                  | 20 | 0 | S03 |
| .....aaauuccgucgguaauuuccg.....                                                                                 | 30 | 0 | S03 |
| .....aaauuccgucgguaauuuccC.....                                                                                 | 2  | 1 | S03 |
| .....aaauuccgucgguaauuuccga.....                                                                                | 3  | 0 | S03 |
| .....aaauuccgucgguaauuuccgag.....                                                                               | 9  | 0 | S03 |
| .....aaauuccgucgguaauuuccgagg.....                                                                              | 1  | 0 | S03 |
| .....aaauuccgucgguaauuuccgagga.....                                                                             | 5  | 0 | S03 |
| .....aaauuccgucgguaauuuccgaggG.....                                                                             | 2  | 1 | S03 |
| .....auuccgucgguaauuucc.....                                                                                    | 8  | 0 | S03 |
| .....auuccgucgguaauuuccg.....                                                                                   | 9  | 0 | S03 |
| .....auuccgucgguaauuuccga.....                                                                                  | 1  | 0 | S03 |
| .....auuccgucgguaauuuccgag.....                                                                                 | 1  | 0 | S03 |
| .....auuccgucgguaauuuccgagg.....                                                                                | 5  | 0 | S03 |
| .....uuccgucgguaauuuccg.....                                                                                    | 1  | 0 | S03 |
| .....uuccgucgguaauuuccgag.....                                                                                  | 1  | 0 | S03 |
| .....uuccgucgguaauuuccga.....                                                                                   | 1  | 0 | S03 |
| .....guauauuccgaggaaauuccCa.....                                                                                | 1  | 1 | S03 |
| .....guauauuccgaggaaauuccga.....                                                                                | 9  | 0 | S03 |
| .....guauauuccgaggaaauuccgaU.....                                                                               | 1  | 1 | S03 |
| .....guauauuccgaggaaauuccgag.....                                                                               | 1  | 0 | S03 |
| .....guauauuccgaggaaauuccgagU.....                                                                              | 2  | 1 | S03 |
| .....uauauuccgaggaaauuccga.....                                                                                 | 16 | 0 | S03 |
| .....uauauuccgaggaaauuccgag.....                                                                                | 1  | 0 | S03 |
| .....uauauuccgaggaaauuccgagU.....                                                                               | 1  | 1 | S03 |
| .....auauuccgaggaaauucccg.....                                                                                  | 2  | 0 | S03 |
| .....auauuccgaggaaauucccg.....                                                                                  | 2  | 0 | S03 |
| .....auauuccgaggaaauucccgag.....                                                                                | 1  | 0 | S03 |
| .....auauuccgaggaaauucccgagU.....                                                                               | 11 | 1 | S03 |
| .....auauuccgaggaaauucccagg.....                                                                                | 1  | 0 | S03 |
| .....uauuccgaggaaauucccg.....                                                                                   | 1  | 0 | S03 |
| .....uauuccgaggaaauucccgagU.....                                                                                | 1  | 1 | S03 |
| .....uauuccgaggaaauucccagg.....                                                                                 | 2  | 0 | S03 |
| .....auuccgaggaaauuccga.....                                                                                    | 2  | 0 | S03 |
| .....auuccgaggaaauucccagg.....                                                                                  | 2  | 0 | S03 |

Star

Mature

uccucggaauauuccgauggauuaauguuucccggaauucccgucgguauauuccgaggaaauuccgagguuuucauuuccgucggaauugucgucagaaauccauugu

|                                        |     |   |     |
|----------------------------------------|-----|---|-----|
| .....Guuccgaggaaauuccgagg.....         | 1   | 1 | S03 |
| .....auuccgaggaaauuccgagU.....         | 1   | 1 | S03 |
| .....uuccgaggaaauuccgag.....           | 1   | 0 | S03 |
| .....uccgaggaaauuccgagCuuu.....        | 1   | 1 | S03 |
| .....gguuuucauuuuuccgucggaCgu.....     | 2   | 1 | S03 |
| .....gAuuuucauuuuuccgucggaauugu.....   | 2   | 1 | S03 |
| .....Auuuucauuuuuccgucggaauuguc.....   | 2   | 1 | S03 |
| .....gCuuuucauuuuuccgucggaauuguc.....  | 1   | 1 | S03 |
| .....uuuucauuuuuccgucggaauA.....       | 1   | 1 | S03 |
| .....uuCuuuuuuuccgucggaauuguc.....     | 1   | 1 | S03 |
| .....uuuucauuuuuccgucggaauuguc.....    | 2   | 0 | S03 |
| .....uuuucauuuuuccgucggaauugucc.....   | 11  | 0 | S03 |
| .....Cuuucauuuuuccgucggaauugucc.....   | 1   | 1 | S03 |
| .....uuuucauuuuuccgucggaauUucc.....    | 1   | 1 | S03 |
| .....uuuucauuuuuccgucggaauugucA.....   | 1   | 1 | S03 |
| .....uCuuucauuuuuccgucggaauugucc.....  | 1   | 1 | S03 |
| .....uuuucauuuuuccguUggaaugucc.....    | 1   | 1 | S03 |
| .....Nuuucauuuuuccgucggaauugucc.....   | 1   | 1 | S03 |
| .....uuuucauuuuuccgucggaauugucU.....   | 6   | 1 | S03 |
| .....uuuucauuuuuccgucggaauuguccA.....  | 1   | 1 | S03 |
| .....uuuucauuuuuccgucggaauuguccgu..... | 7   | 0 | S03 |
| .....uuucauuuuuccgucgga.....           | 1   | 0 | S03 |
| .....Nuucauuuuuccgucggaau.....         | 1   | 1 | S03 |
| .....uuucauuuuuccgucggaau.....         | 2   | 0 | S03 |
| .....uuucauuuuuccgucggaauug.....       | 13  | 0 | S03 |
| .....uuucauuCuccgucggaauugu.....       | 1   | 1 | S03 |
| .....uuucauuuuuccgucggaauugG.....      | 1   | 1 | S03 |
| .....uuucauuuuuccgucggaauugu.....      | 13  | 0 | S03 |
| .....uuucauuuuuccgucggaauuguG.....     | 4   | 1 | S03 |
| .....uuucauuuuuccgucggaauugCauguc..... | 1   | 1 | S03 |
| .....uuucaCuuuuccgucggaauuguc.....     | 1   | 1 | S03 |
| .....Nuucauuuuuccgucggaauuguc.....     | 3   | 1 | S03 |
| .....uuucauuuuuccgucggaauuguc.....     | 1   | 1 | S03 |
| .....uuucauuuuuccgucggaauuguc.....     | 411 | 0 | S03 |
| .....uuucauuuuuccgucggaauuguc.....     | 1   | 1 | S03 |
| .....uuGcauuuuuccgucggaauuguc.....     | 1   | 1 | S03 |
| .....uCucauuuuuccgucggaauuguc.....     | 1   | 1 | S03 |
| .....uuucauuuuuccgucggaauugGc.....     | 1   | 1 | S03 |
| .....uuucauuuuuccgucggaauugAc.....     | 1   | 1 | S03 |
| .....uuucauuCuccgucggaauuguc.....      | 2   | 1 | S03 |
| .....uGucauuuuuccgucggaauuguc.....     | 2   | 1 | S03 |
| .....uuucauuuuuccgucggaauugUauguc..... | 2   | 1 | S03 |
| .....uuucauuuuuccgucggaauugCc.....     | 2   | 1 | S03 |
| .....uuucauuuuuccgucggaauugucG.....    | 1   | 1 | S03 |
| .....Guucauuuuuccgucggaauugucc.....    | 1   | 1 | S03 |
| .....uuucauuCuccgucggaauugucc.....     | 1   | 1 | S03 |
| .....uuucauuuuuccgucggaauugucc.....    | 24  | 0 | S03 |
| .....uuucauuuuuccgucggaauugucc.....    | 1   | 1 | S03 |
| .....Auucauuuuuccgucggaauugucc.....    | 1   | 1 | S03 |
| .....uuucauuuuuccgucggaauuguccg.....   | 71  | 0 | S03 |
| .....uCucauuuuuccgucggaauuguccg.....   | 1   | 1 | S03 |
| .....uuucauuuuuccgucggaauuguccg.....   | 1   | 1 | S03 |
| .....uuucauuuuuccgucggaauuguccC.....   | 1   | 1 | S03 |
| .....uuucauuuuuccgucggaauuguccg.....   | 1   | 1 | S03 |
| .....uuucauuuuuccgucggaauuguccgA.....  | 3   | 1 | S03 |
| .....uuucauuuuuccgucggaauugGccg.....   | 1   | 1 | S03 |
| .....uuucauuuuuccgucggaauuguccg.....   | 69  | 0 | S03 |
| .....uuucauuuuuccgucggaauuguccg.....   | 1   | 1 | S03 |
| .....Auucauuuuuccgucggaauuguccg.....   | 1   | 1 | S03 |
| .....uuucauuuuuccgucggaauuguccg.....   | 3   | 1 | S03 |
| .....uucauuuuuccgucggaau.....          | 2   | 0 | S03 |
| .....uucauuuuuccgucggaauug.....        | 4   | 0 | S03 |
| .....Gucauuuuuccgucggaauug.....        | 1   | 1 | S03 |
| .....uucauuuuuccgucggaauugG.....       | 1   | 1 | S03 |
| .....uucauuuuuccgucggaauugu.....       | 1   | 0 | S03 |
| .....uucauuuuuccgucggaauuguc.....      | 63  | 0 | S03 |
| .....Gucauuuuuccgucggaauuguc.....      | 1   | 1 | S03 |
| .....uucauuuuuccgucggaauugCcc.....     | 1   | 1 | S03 |
| .....uucauuuuuccgucggaauugGcc.....     | 1   | 1 | S03 |
| .....uucauuuuuccgucggaauugucG.....     | 1   | 1 | S03 |

Star

Mature

uccucggaauauuccgauggauuaauguuuccucggaauuccgucgguauauuccgaggaaauuccgagguuuucauuuuccgucggaauuccgucgagaauaccuauugu

|                                      |     |   |     |
|--------------------------------------|-----|---|-----|
| .....uucauuuuccgucggaauGAcc.....     | 1   | 1 | S03 |
| .....uucauuuuccgucggaauGucc.....     | 22  | 0 | S03 |
| .....uucauuuuccgucggaauGuccg.....    | 26  | 0 | S03 |
| .....uucauuuuccgGcggaauguccg.....    | 1   | 1 | S03 |
| .....uucauuuuccgucggaauGuccGA.....   | 10  | 1 | S03 |
| .....NucauuuuccgucggaauGuccgu.....   | 1   | 1 | S03 |
| .....uucauuuuccgucggaauGuccGG.....   | 21  | 1 | S03 |
| .....uGcauuuuccgucggaauGuccgu.....   | 1   | 1 | S03 |
| .....uucauuuuccgGcggaauguccgu.....   | 1   | 1 | S03 |
| .....uucauuuuccgucggaauGuccgu.....   | 1   | 1 | S03 |
| .....uucauuuuccgucggaauGuccgu.....   | 4   | 1 | S03 |
| .....uucauuuuccgucggaauGuccgu.....   | 2   | 1 | S03 |
| .....uucauuuuccgucggaauGuccgu.....   | 1   | 1 | S03 |
| .....uucauuuuccgucggaauGuccgu.....   | 1   | 1 | S03 |
| .....GucauuuuccgucggaauGuccgu.....   | 4   | 1 | S03 |
| .....uucauuuuccgucggaauGuccCu.....   | 3   | 1 | S03 |
| .....uucauuuuccgucggaauGuccgu.....   | 504 | 0 | S03 |
| .....uucauuuuccgucggaauGuccgu.....   | 1   | 1 | S03 |
| .....ucauuuuccgucggaauG.....         | 4   | 0 | S03 |
| .....ucauuuuccgucggaauG.....         | 1   | 1 | S03 |
| .....ucauuuuccgucggaauGC.....        | 1   | 1 | S03 |
| .....ucauuuuccgucggaauGucc.....      | 16  | 0 | S03 |
| .....ucauuuuccgucggaauGucc.....      | 5   | 0 | S03 |
| .....ucauuuuccgucggaauGuccg.....     | 14  | 0 | S03 |
| .....ucauuuuccgucggaauGuccgu.....    | 15  | 0 | S03 |
| .....ucauuuuccgucggaauGuccguc.....   | 23  | 0 | S03 |
| .....cauuuuccgucggaauGucc.....       | 3   | 0 | S03 |
| .....cauuuuccgucggaauGucc.....       | 2   | 0 | S03 |
| .....cauuuuccgucggaauGuccg.....      | 10  | 0 | S03 |
| .....cauuuuccgucggaauGuccg.....      | 1   | 1 | S03 |
| .....cauuuuccgucggaauGuccGG.....     | 4   | 1 | S03 |
| .....NauuuuccgucggaauGuccgu.....     | 1   | 1 | S03 |
| .....cauuuuccgucggaauGuccgu.....     | 74  | 0 | S03 |
| .....cauuuuccgucggaauGuccGA.....     | 3   | 1 | S03 |
| .....cauuuuccgucggaauGuccgu.....     | 1   | 1 | S03 |
| .....cauuuuccgucggaauGuccguc.....    | 2   | 0 | S03 |
| .....cauuuuccgucggaauGuccguca.....   | 16  | 0 | S03 |
| .....auuuuuccgucggaauGucc.....       | 1   | 0 | S03 |
| .....auuuuuccgucggaauGucc.....       | 3   | 0 | S03 |
| .....auuuuuccgucggaauGuccg.....      | 4   | 0 | S03 |
| .....auuuuuccgucggaauGuccGA.....     | 4   | 1 | S03 |
| .....auuuuuccgucggaauGuccGG.....     | 8   | 1 | S03 |
| .....auuuuuccgucggaauGuccgu.....     | 63  | 0 | S03 |
| .....auuuuuccgucggaauGuccguc.....    | 6   | 0 | S03 |
| .....auuuuuccgucggaauGuccGAcA.....   | 1   | 1 | S03 |
| .....auuuuuccgucggaauGuccguca.....   | 46  | 0 | S03 |
| .....auuuuuccgucggaauGuccgucaU.....  | 1   | 1 | S03 |
| .....auuuuuccgucggaauGuccgucag.....  | 36  | 0 | S03 |
| .....auuuuuccgucggaauGuccgucagG..... | 1   | 1 | S03 |
| .....uuuuuccgucggaauGucc.....        | 2   | 0 | S03 |
| .....CuuuuccgucggaauGuccg.....       | 1   | 1 | S03 |
| .....uuuuuccgucggaauGuccg.....       | 2   | 0 | S03 |
| .....uuuuuccgucggaauGuccGG.....      | 1   | 1 | S03 |
| .....uuuuuccgucggaauGuccgu.....      | 18  | 0 | S03 |
| .....uuuuuccgucggaauGuccGA.....      | 1   | 1 | S03 |
| .....uuuuuccgucggaauGuccguc.....     | 3   | 0 | S03 |
| .....uuuuuccgucggaauGuccguca.....    | 3   | 0 | S03 |
| .....uuuuuccgucggaauGuccgucag.....   | 2   | 0 | S03 |
| .....uuuuuccgucggaauGuccgucagA.....  | 10  | 0 | S03 |
| .....uuuuuccgucggaauGuccGA.....      | 1   | 1 | S03 |
| .....uuuuuccgucggaauGuccgu.....      | 7   | 0 | S03 |
| .....uuuuuccgucggaauGuccguca.....    | 5   | 0 | S03 |
| .....uuuuuccgucggaauGuccguca.....    | 1   | 1 | S03 |
| .....uuuuuccgucggaauGuccgucag.....   | 4   | 0 | S03 |
| .....uuuuuccgucggaauGuccgucagC.....  | 1   | 1 | S03 |
| .....uuuuuccgucggaauGuccgucagA.....  | 1   | 0 | S03 |
| .....uuuuuccgucggaauGuccgu.....      | 1   | 0 | S03 |
| .....uuuuuccgucggaauGuccguca.....    | 3   | 0 | S03 |
| .....uuuuuccgucggaauGuccgucagA.....  | 2   | 0 | S03 |
| .....uccgucggaauGuccguc.....         | 1   | 0 | S03 |

Star

Mature

|                                                                                                                |    |   |     |
|----------------------------------------------------------------------------------------------------------------|----|---|-----|
| uccucggaauauuccgauggauuauguuuccucggaauuccugcgguaauuuccgaggaaauuccgagguuuucauuuuccugcggaauguccgucagaauaccuauugu |    |   |     |
| .....uccugcggaauguccguca.....                                                                                  | 1  | 0 | S03 |
| .....uccugcggaauguccgucagaau.....                                                                              | 1  | 0 | S03 |
| .....uccugcggaauguccgucagaauC.....                                                                             | 1  | 1 | S03 |
| .....uccugcggaauguccgucagaaua.....                                                                             | 1  | 0 | S03 |
| .....ccugcggaauguccguca.....                                                                                   | 3  | 0 | S03 |
| .....ccugcggaauguccgucagaau.....                                                                               | 4  | 0 | S03 |
| .....ccugcggaauguccgucagaaua.....                                                                              | 10 | 0 | S03 |
| .....ccugcggaauguccgucagaauac.....                                                                             | 3  | 0 | S03 |
| .....ccugcggaauguccgucagaauacc.....                                                                            | 1  | 0 | S03 |
| .....ucggaauuccgucagaCu.....                                                                                   | 1  | 1 | S03 |
| .....ucggaauuccgucagaau.....                                                                                   | 5  | 0 | S03 |
| .....ucggaauuccgucagaaua.....                                                                                  | 3  | 0 | S03 |
| .....ucggaauuccgucagaauac.....                                                                                 | 1  | 0 | S03 |
| .....ucggaauuccgucagaauacc.....                                                                                | 11 | 0 | S03 |
| .....ucggaauAccgucagaauacca.....                                                                               | 1  | 1 | S03 |
| .....ucggaauuccgucagaauaUca.....                                                                               | 49 | 1 | S03 |
| .....ucggaauuccgucagaauacca.....                                                                               | 1  | 1 | S03 |
| .....ucggaauuccgucagaauacca.....                                                                               | 1  | 1 | S03 |
| .....ucggaauuccgucagaauacca.....                                                                               | 16 | 0 | S03 |
| .....ucggaauuccgucagaauaccu.....                                                                               | 1  | 0 | S03 |
| .....ucggaauuccgucagaauaccG.....                                                                               | 1  | 1 | S03 |
| .....cggaauguccgucagaau.....                                                                                   | 2  | 0 | S03 |
| .....cggaauguccgucagaaua.....                                                                                  | 2  | 0 | S03 |
| .....cggaauguccgucagaauac.....                                                                                 | 3  | 0 | S03 |
| .....cggaauguccgucagaauacc.....                                                                                | 1  | 0 | S03 |
| .....cggaauguccgucagaauacca.....                                                                               | 2  | 0 | S03 |
| .....cggaauguccgucagaauaUca.....                                                                               | 9  | 1 | S03 |
| .....gaauguccgucagaauacca.....                                                                                 | 1  | 0 | S03 |
| .....guccgucagaauaUcauug.....                                                                                  | 1  | 1 | S03 |
| .....ggaauauuccgauggauuGauguu.....                                                                             | 1  | 1 | S04 |
| .....aaauuccgauggauuGauguuuc.....                                                                              | 1  | 1 | S04 |
| .....auauuccgauggauuGauguu.....                                                                                | 1  | 1 | S04 |
| .....auauuccgauggauuGauguuucc.....                                                                             | 2  | 1 | S04 |
| .....auuccgauggauuGauguuuc.....                                                                                | 2  | 1 | S04 |
| .....auggauuGauguuucccgg.....                                                                                  | 1  | 1 | S04 |
| .....auggauuGauguuucccggaaau.....                                                                              | 1  | 1 | S04 |
| .....auuaauguuucccggaaauuccA.....                                                                              | 1  | 1 | S04 |
| .....auuaauguuucccAgaauuccgu.....                                                                              | 1  | 1 | S04 |
| .....auuaauguuucccggaaauuccgu.....                                                                             | 1  | 0 | S04 |
| .....uaauguuucccggaaauuc.....                                                                                  | 1  | 0 | S04 |
| .....uaauguuucccggaaauuccguU.....                                                                              | 1  | 1 | S04 |
| .....aauguuucccggaaauucccgg.....                                                                               | 1  | 0 | S04 |
| .....auguuucccguUaaauuccguc.....                                                                               | 1  | 1 | S04 |
| .....auguuucccggaaauuccguc.....                                                                                | 3  | 0 | S04 |
| .....auguuucccggaaauuccgucA.....                                                                               | 1  | 1 | S04 |
| .....auguuucccggaaauucccggG.....                                                                               | 1  | 1 | S04 |
| .....auguuucccggaaauucccggG.....                                                                               | 2  | 1 | S04 |
| .....auguuucccggaaauucccggA.....                                                                               | 2  | 1 | S04 |
| .....auguuucccggaaauucccggG.....                                                                               | 24 | 0 | S04 |
| .....uguuucccggaaauuccgu.....                                                                                  | 1  | 0 | S04 |
| .....uguuucccggaaauuccguc.....                                                                                 | 1  | 0 | S04 |
| .....uguuucccggaaauucccgg.....                                                                                 | 2  | 0 | S04 |
| .....uguuucccggaaauucccggua.....                                                                               | 2  | 0 | S04 |
| .....uguuucccAgaauucccggua.....                                                                                | 2  | 1 | S04 |
| .....guuucccggaaauuccgu.....                                                                                   | 2  | 0 | S04 |
| .....guuucccggaaauucccgg.....                                                                                  | 2  | 0 | S04 |
| .....guuucccggaaauucccggG.....                                                                                 | 14 | 0 | S04 |
| .....guuucccggaaauucccggG.....                                                                                 | 1  | 1 | S04 |
| .....guuucccggaaauucccggua.....                                                                                | 10 | 0 | S04 |
| .....guuucccggaaauucccggG.....                                                                                 | 4  | 1 | S04 |
| .....guuucccggaaauucccggG.....                                                                                 | 1  | 1 | S04 |
| .....guuucccAgaauucccggua.....                                                                                 | 1  | 1 | S04 |
| .....guuucccggaaauucccggua.....                                                                                | 13 | 0 | S04 |
| .....guuucccggaaauucccgguaC.....                                                                               | 2  | 1 | S04 |
| .....guuucccggaaauucccgguaGu.....                                                                              | 1  | 1 | S04 |
| .....uuucccggaaauuccguc.....                                                                                   | 1  | 0 | S04 |
| .....uuucccggaaauucccggG.....                                                                                  | 4  | 0 | S04 |
| .....uuucccggaaauucccggua.....                                                                                 | 2  | 0 | S04 |
| .....uuucccggaaauucccggua.....                                                                                 | 1  | 0 | S04 |

Star

Mature

uccucggaauauuccgauggauuauguuuucccggaauucccgucgguauauuccgaggaaauuccgagguuuucauuuuuccgucggaauugucgucagaaauaccuauugu

|                                      |    |   |     |
|--------------------------------------|----|---|-----|
| ..... uuccucggaauuccgucgguaua.....   | 1  | 0 | S04 |
| ..... uuccucggaauuccgucgguauG.....   | 4  | 1 | S04 |
| ..... uuccucggaauuccgucgguauau.....  | 1  | 0 | S04 |
| ..... uccucggaauuccgucggu.....       | 1  | 0 | S04 |
| ..... uccucggaauuccgucggu.....       | 1  | 0 | S04 |
| ..... uccucggaauuccgucgguauuu.....   | 4  | 0 | S04 |
| ..... ucAuccggaauuccgucgguauuu.....  | 1  | 1 | S04 |
| ..... ccucggaauuccgucgguauuu.....    | 3  | 0 | S04 |
| ..... ccucggaauuccgucgguauuu.....    | 19 | 0 | S04 |
| ..... cucggaauuccgucggu.....         | 6  | 0 | S04 |
| ..... cucggaauuccgucgguaua.....      | 1  | 0 | S04 |
| ..... cucggaauuccgucgguauau.....     | 3  | 0 | S04 |
| ..... cucggaauuccgucgguauuu.....     | 60 | 0 | S04 |
| ..... cucggGauuccgucgguauuu.....     | 1  | 1 | S04 |
| ..... cucggaauuccgucgguauuu.....     | 23 | 0 | S04 |
| ..... cucggaauuccgucgguauuuG.....    | 1  | 1 | S04 |
| ..... Nucggaauuccgucgguauuuucc.....  | 1  | 1 | S04 |
| ..... cucggaauuccgucgguauuuucc.....  | 29 | 0 | S04 |
| ..... ucggaauuccgucgguau.....        | 2  | 0 | S04 |
| ..... ucggaauuccgucgguaua.....       | 4  | 0 | S04 |
| ..... ucggaauuccgucgguauG.....       | 1  | 1 | S04 |
| ..... ucggaauuccgucgguauau.....      | 2  | 0 | S04 |
| ..... ucggaauuccgucgguauuu.....      | 30 | 0 | S04 |
| ..... Ncggaauuccgucgguauuuucc.....   | 1  | 1 | S04 |
| ..... ucggaauuccgucgguauuuucc.....   | 85 | 0 | S04 |
| ..... ucggaauuccgGcgguauuuucc.....   | 1  | 1 | S04 |
| ..... cggaauuccgucgguaua.....        | 1  | 0 | S04 |
| ..... cggaauuccgucgguauau.....       | 1  | 0 | S04 |
| ..... cggaauuccgucgguauuu.....       | 8  | 0 | S04 |
| ..... cggaauuccgucgguauuuucc.....    | 23 | 0 | S04 |
| ..... cggaauuccgucgguauuuG.....      | 1  | 1 | S04 |
| ..... cggaauuccgucgguauuuucc.....    | 3  | 0 | S04 |
| ..... cggaauuccgucgguauuuuccg.....   | 1  | 0 | S04 |
| ..... cggaauuccgucgguauuuuccC.....   | 1  | 1 | S04 |
| ..... ggaauuccgucgguauau.....        | 1  | 0 | S04 |
| ..... ggaauuccgucgguauuu.....        | 13 | 0 | S04 |
| ..... ggaauuccgucgguauuuucc.....     | 5  | 0 | S04 |
| ..... ggaauuccgucgguauuuuccg.....    | 1  | 0 | S04 |
| ..... ggaauuccgucgguauuuuccga.....   | 2  | 0 | S04 |
| ..... ggaauuccgucgguauuuuccgag.....  | 9  | 0 | S04 |
| ..... gaaauuccgucgguauuu.....        | 1  | 0 | S04 |
| ..... gaaauuccgucgguauuuucc.....     | 9  | 0 | S04 |
| ..... gaaauuccgucgguauuuucc.....     | 13 | 0 | S04 |
| ..... gaaauuccgucgguauuuuccg.....    | 74 | 0 | S04 |
| ..... gUauuccgucgguauuuuccg.....     | 1  | 1 | S04 |
| ..... gaaauuccgucgguauuuuccga.....   | 10 | 0 | S04 |
| ..... gaaauuccgucgguauuuuccgag.....  | 4  | 0 | S04 |
| ..... gaaauuccgucgguauuuuccgagg..... | 1  | 0 | S04 |
| ..... aaauuccgucgguauuuucc.....      | 2  | 0 | S04 |
| ..... aaauuccgucgguauuuucc.....      | 16 | 0 | S04 |
| ..... aaauuccgucgguauuuuccg.....     | 21 | 0 | S04 |
| ..... Naaauuccgucgguauuuuccg.....    | 1  | 1 | S04 |
| ..... aaauuccgucgguauuuuccC.....     | 1  | 1 | S04 |
| ..... aaauuccgGcgguauuuuccg.....     | 1  | 1 | S04 |
| ..... aaauuccgucgguauuuuccga.....    | 8  | 0 | S04 |
| ..... aaauuccgucgguauuuuccgag.....   | 3  | 0 | S04 |
| ..... aaauuccgucgguauuuuccgagg.....  | 2  | 0 | S04 |
| ..... aaauuccgucgguauuuuccgagga..... | 8  | 0 | S04 |
| ..... auucGgucgguauuuucc.....        | 1  | 1 | S04 |
| ..... auuccgucgguauuuucc.....        | 9  | 0 | S04 |
| ..... auuccgucgguauuuuccg.....       | 12 | 0 | S04 |
| ..... auuccgucgguauuuuccgC.....      | 1  | 1 | S04 |
| ..... auuccgucgguauuuuccgag.....     | 3  | 0 | S04 |
| ..... auuccgucgguauuuuccgagg.....    | 11 | 0 | S04 |
| ..... uuccgucgguauuuuccg.....        | 2  | 0 | S04 |
| ..... uuccgucgguauuuuccgag.....      | 1  | 0 | S04 |
| ..... uccgucgguauuuuccga.....        | 1  | 0 | S04 |
| ..... gguauuuuccgaggaaauuccgag.....  | 1  | 0 | S04 |
| ..... guauuuuccgaggaaauuccg.....     | 1  | 0 | S04 |
| ..... guauuuucccaggaaauuccga.....    | 11 | 0 | S04 |

Star

Mature

uccucggaauauuccgaggauuaauguuuccucggaauuccgucgguauauuccgaggaaauuccgagguuuucauuuccgucggaauugucgucagaaauccauugu

|                                   |     |   |     |
|-----------------------------------|-----|---|-----|
| .....uauGuuccgaggaaaauccg.....    | 1   | 1 | S04 |
| .....uauauuccgaggaaaauccga.....   | 18  | 0 | S04 |
| .....uauauuccgaggaaaauccCa.....   | 1   | 1 | S04 |
| .....uauauuccgaggaaaauccgaU.....  | 1   | 1 | S04 |
| .....uauauuccgaggaaaauccgag.....  | 8   | 0 | S04 |
| .....uauauuccgaggaaaauccgagU..... | 2   | 1 | S04 |
| .....auauuccgaggaaaauccg.....     | 2   | 0 | S04 |
| .....auauuccgaggaaaauccga.....    | 5   | 0 | S04 |
| .....auauuccgaggaaaauccgag.....   | 1   | 0 | S04 |
| .....auauuccgaggaaaauccgagU.....  | 7   | 1 | S04 |
| .....auauuccgaggaaaauccgagg.....  | 2   | 0 | S04 |
| .....uauuccgaggaaaauccga.....     | 1   | 0 | S04 |
| .....uauuccgaggaaaauccgaCgu.....  | 1   | 1 | S04 |
| .....auuccgaggaaaauccgagg.....    | 4   | 0 | S04 |
| .....gAuuuucauuuccgucggaaug.....  | 1   | 1 | S04 |
| .....gCuuucauuuccgucggaaug.....   | 1   | 1 | S04 |
| .....guuucauuuccgucggaaug.....    | 1   | 0 | S04 |
| .....Auuuucauuuccgucggaauguc..... | 4   | 1 | S04 |
| .....uuuucuuuccgucggaaug.....     | 1   | 0 | S04 |
| .....Nuuucauuuccgucggaaug.....    | 1   | 1 | S04 |
| .....uuuucauuuccgucggaaug.....    | 3   | 0 | S04 |
| .....uuuucuuuccgucggaaugU.....    | 2   | 1 | S04 |
| .....uuuuAuuuccgucggaauguc.....   | 1   | 1 | S04 |
| .....uuuucuuuccgucggaauguc.....   | 3   | 0 | S04 |
| .....uuuucuuuccgucggauguc.....    | 1   | 1 | S04 |
| .....uuuucuuuccgucggaugucA.....   | 3   | 1 | S04 |
| .....uuuucuuuccgucggaugucU.....   | 7   | 1 | S04 |
| .....uuuucuuuccgucggaugucc.....   | 22  | 0 | S04 |
| .....uuuucuuuccgucggauguccgu..... | 1   | 1 | S04 |
| .....uuuucuuuccgucggauguccgu..... | 9   | 0 | S04 |
| .....uuuucuuuccgucggauguccgu..... | 1   | 1 | S04 |
| .....uuuucuuuccgucggauguccgu..... | 1   | 1 | S04 |
| .....uuuucuuuccgucggauguccgu..... | 1   | 1 | S04 |
| .....uuuucuuuccgucggauguccgu..... | 2   | 1 | S04 |
| .....uuuucuuuccgucggauguccgu..... | 2   | 0 | S04 |
| .....uuuucuuuccgucggauguccgu..... | 2   | 0 | S04 |
| .....uuuucuuuccgucggauguccgu..... | 20  | 0 | S04 |
| .....uuuucuuuccgucggauguccgu..... | 3   | 1 | S04 |
| .....uuuucuuuccgucggauguccgu..... | 2   | 1 | S04 |
| .....uuuucuuuccgucggauguccgu..... | 3   | 1 | S04 |
| .....uuuucuuuccgucggauguccgu..... | 1   | 1 | S04 |
| .....uuuucuuuccgucggauguccgu..... | 14  | 0 | S04 |
| .....uuuucuuuccgucggauguccgu..... | 1   | 1 | S04 |
| .....uuuucuuuccgucggauguccgu..... | 1   | 1 | S04 |
| .....uuuucuuuccgucggauguccgu..... | 1   | 1 | S04 |
| .....uuuucuuuccgucggauguccgu..... | 2   | 1 | S04 |
| .....uuuucuuuccgucggauguccgu..... | 385 | 0 | S04 |
| .....uuuucuuuccgucggauguccgu..... | 3   | 1 | S04 |
| .....uuuucuuuccgucggauguccgu..... | 1   | 1 | S04 |
| .....uuuucuuuccgucggauguccgu..... | 2   | 1 | S04 |
| .....uuuucuuuccgucggauguccgu..... | 11  | 1 | S04 |
| .....uuuucuuuccgucggauguccgu..... | 3   | 1 | S04 |
| .....uuuucuuuccgucggauguccgu..... | 3   | 1 | S04 |
| .....uuuucuuuccgucggauguccgu..... | 1   | 1 | S04 |
| .....uuuucuuuccgucggauguccgu..... | 1   | 1 | S04 |
| .....uuuucuuuccgucggauguccgu..... | 1   | 1 | S04 |
| .....uuuucuuuccgucggauguccgu..... | 1   | 1 | S04 |
| .....uuuucuuuccgucggauguccgu..... | 3   | 1 | S04 |
| .....uuuucuuuccgucggauguccgu..... | 1   | 1 | S04 |
| .....uuuucuuuccgucggauguccgu..... | 1   | 1 | S04 |
| .....uuuucuuuccgucggauguccgu..... | 24  | 0 | S04 |
| .....uuuucuuuccgucggauguccgu..... | 3   | 1 | S04 |
| .....uuuucuuuccgucggauguccgu..... | 1   | 1 | S04 |
| .....uuuucuuuccgucggauguccgu..... | 118 | 0 | S04 |
| .....uuuucuuuccgucggauguccgu..... | 1   | 1 | S04 |
| .....uuuucuuuccgucggauguccgu..... | 1   | 1 | S04 |
| .....uuuucuuuccgucggauguccgu..... | 2   | 1 | S04 |
| .....uuuucuuuccgucggauguccgu..... | 1   | 1 | S04 |
| .....uuuucuuuccgucggauguccgu..... | 2   | 1 | S04 |
| .....uuuucuuuccgucggauguccgu..... | 1   | 1 | S04 |
| .....uuuucuuuccgucggauguccgu..... | 2   | 1 | S04 |
| .....uuuucuuuccgucggauguccgu..... | 7   | 1 | S04 |



Star

Mature

uccucggaauauuccgauggauuaauguuucccggaauuccgucgguauauuccgaggaaauuccgagguuuucauuuuccgucggaauuccgucgagaauaccgauu

|                               |     |   |     |
|-------------------------------|-----|---|-----|
| .....uucauuuuccgucggaauG..... | 1   | 1 | S04 |
| .....uucauuuuccgucggaauG..... | 100 | 0 | S04 |
| .....uucauuuuccgucggaau.....  | 2   | 0 | S04 |
| .....uucauuuuccgucggaauG..... | 2   | 0 | S04 |
| .....uucauuuuccgucggaauG..... | 1   | 1 | S04 |
| .....uucauuuuccgucggaauG..... | 1   | 0 | S04 |
| .....uucauuuuccgucggaauG..... | 3   | 1 | S04 |
| .....uucauuuuccgucggaauG..... | 63  | 0 | S04 |
| .....uucauuuuccgucggaauG..... | 1   | 1 | S04 |
| .....uucauuuuccgucggaauG..... | 1   | 1 | S04 |
| .....uucauuuuccgucggaauG..... | 1   | 1 | S04 |
| .....uucauuuuccgucggaauG..... | 38  | 0 | S04 |
| .....uucauuuuccgucggaauG..... | 31  | 0 | S04 |
| .....uucauuuuccgucggaauG..... | 2   | 1 | S04 |
| .....uucauuuuccgucggaauG..... | 543 | 0 | S04 |
| .....uucauuuuccgucggaauG..... | 1   | 1 | S04 |
| .....uucauuuuccgucggaauG..... | 4   | 1 | S04 |
| .....uucauuuuccgucggaauG..... | 1   | 1 | S04 |
| .....uucauuuuccgucggaauG..... | 1   | 1 | S04 |
| .....uucauuuuccgucggaauG..... | 3   | 1 | S04 |
| .....uucauuuuccgucggaauG..... | 1   | 1 | S04 |
| .....uucauuuuccgucggaauG..... | 39  | 1 | S04 |
| .....uucauuuuccgucggaauG..... | 28  | 1 | S04 |
| .....uucauuuuccgucggaauG..... | 2   | 1 | S04 |
| .....uucauuuuccgucggaauG..... | 1   | 1 | S04 |
| .....uucauuuuccgucggaauG..... | 3   | 1 | S04 |
| .....uucauuuuccgucggaauG..... | 2   | 1 | S04 |
| .....uucauuuuccgucggaauG..... | 1   | 0 | S04 |
| .....uucauuuuccgucggaauG..... | 2   | 0 | S04 |
| .....uucauuuuccgucggaauG..... | 4   | 0 | S04 |
| .....uucauuuuccgucggaauG..... | 1   | 1 | S04 |
| .....uucauuuuccgucggaauG..... | 17  | 0 | S04 |
| .....uucauuuuccgucggaauG..... | 1   | 1 | S04 |
| .....uucauuuuccgucggaauG..... | 13  | 0 | S04 |
| .....uucauuuuccgucggaauG..... | 1   | 1 | S04 |
| .....uucauuuuccgucggaauG..... | 30  | 0 | S04 |
| .....uucauuuuccgucggaauG..... | 1   | 1 | S04 |
| .....uucauuuuccgucggaauG..... | 36  | 0 | S04 |
| .....uucauuuuccgucggaauG..... | 1   | 1 | S04 |
| .....uucauuuuccgucggaauG..... | 2   | 1 | S04 |
| .....uucauuuuccgucggaauG..... | 1   | 1 | S04 |
| .....uucauuuuccgucggaauG..... | 1   | 1 | S04 |
| .....uucauuuuccgucggaauG..... | 26  | 0 | S04 |
| .....uucauuuuccgucggaauG..... | 5   | 0 | S04 |
| .....uucauuuuccgucggaauG..... | 2   | 0 | S04 |
| .....uucauuuuccgucggaauG..... | 3   | 0 | S04 |
| .....uucauuuuccgucggaauG..... | 20  | 0 | S04 |
| .....uucauuuuccgucggaauG..... | 4   | 1 | S04 |
| .....uucauuuuccgucggaauG..... | 87  | 0 | S04 |
| .....uucauuuuccgucggaauG..... | 1   | 1 | S04 |
| .....uucauuuuccgucggaauG..... | 6   | 1 | S04 |
| .....uucauuuuccgucggaauG..... | 1   | 1 | S04 |
| .....uucauuuuccgucggaauG..... | 1   | 1 | S04 |
| .....uucauuuuccgucggaauG..... | 1   | 0 | S04 |
| .....uucauuuuccgucggaauG..... | 17  | 0 | S04 |
| .....uucauuuuccgucggaauG..... | 3   | 0 | S04 |
| .....uucauuuuccgucggaauG..... | 6   | 0 | S04 |
| .....uucauuuuccgucggaauG..... | 1   | 1 | S04 |
| .....uucauuuuccgucggaauG..... | 8   | 0 | S04 |
| .....uucauuuuccgucggaauG..... | 1   | 1 | S04 |
| .....uucauuuuccgucggaauG..... | 71  | 0 | S04 |
| .....uucauuuuccgucggaauG..... | 3   | 1 | S04 |
| .....uucauuuuccgucggaauG..... | 15  | 0 | S04 |
| .....uucauuuuccgucggaauG..... | 1   | 1 | S04 |
| .....uucauuuuccgucggaauG..... | 70  | 0 | S04 |
| .....uucauuuuccgucggaauG..... | 1   | 1 | S04 |
| .....uucauuuuccgucggaauG..... | 1   | 1 | S04 |
| .....uucauuuuccgucggaauG..... | 2   | 1 | S04 |

Star

Mature

| Sequence                                                                                                     | Star | Mature | Category |
|--------------------------------------------------------------------------------------------------------------|------|--------|----------|
| uccucggaauauuccgauggauaauguuuucccggaauucccgucgguauauuccgaggaaauuccgagguuuucauuuuccgucggaauuccgucagaaauaccgau |      |        |          |
| .....uuuuccgucggaauuccgucag.....                                                                             | 39   | 0      | S04      |
| .....uuuuccgucggaauuccgAcag.....                                                                             | 1    | 1      | S04      |
| .....auCuuccgucggaauuccgucag.....                                                                            | 1    | 1      | S04      |
| .....uuuuccgucgCaauguccgucag.....                                                                            | 2    | 1      | S04      |
| .....uuuuccgucggaauucc.....                                                                                  | 3    | 0      | S04      |
| .....uuuuccgucggaauuccg.....                                                                                 | 6    | 0      | S04      |
| .....uuuuccgucggaauuccC.....                                                                                 | 1    | 1      | S04      |
| .....uuuuccgucggaauuccgG.....                                                                                | 1    | 1      | S04      |
| .....uuuuccgucggaauuccggu.....                                                                               | 21   | 0      | S04      |
| .....uuuuccgucggaauuccgA.....                                                                                | 1    | 1      | S04      |
| .....uuuuccgucggaauuccguc.....                                                                               | 3    | 0      | S04      |
| .....uuuuccgucggaauuccgguca.....                                                                             | 13   | 0      | S04      |
| .....uuuuccgucggaauuccgucag.....                                                                             | 2    | 0      | S04      |
| .....uuuuccgucggaauuccgucaga.....                                                                            | 17   | 0      | S04      |
| .....uuuuccgucggaauuccg.....                                                                                 | 3    | 0      | S04      |
| .....uuuccgucggaauuccgG.....                                                                                 | 1    | 1      | S04      |
| .....uuuccgucggaauuccggu.....                                                                                | 7    | 0      | S04      |
| .....uuuccgucggaauuccgguca.....                                                                              | 3    | 0      | S04      |
| .....uuuccgucggaauuccgucag.....                                                                              | 4    | 0      | S04      |
| .....uuuccgucggaauuccgucaga.....                                                                             | 3    | 0      | S04      |
| .....uuuccgucggaauuccgucagaa.....                                                                            | 1    | 0      | S04      |
| .....uuuccgucggaauuccgucagaCu.....                                                                           | 1    | 1      | S04      |
| .....uuuccgucggaauuccggu.....                                                                                | 3    | 0      | S04      |
| .....uuuccgucggaauuccgguca.....                                                                              | 1    | 1      | S04      |
| .....uuuccgucggaauuccgguca.....                                                                              | 3    | 0      | S04      |
| .....uuuccgucggaauuccgucag.....                                                                              | 2    | 0      | S04      |
| .....uuuccgucggaauuccgucaga.....                                                                             | 2    | 0      | S04      |
| .....uuuccgucggaauuccguc.....                                                                                | 3    | 0      | S04      |
| .....uuuccgucggaauuccgguca.....                                                                              | 3    | 0      | S04      |
| .....uuuccgucggaauuccgucagaau.....                                                                           | 2    | 0      | S04      |
| .....uuuccgucggaauuccgucagaaua.....                                                                          | 2    | 0      | S04      |
| .....uuuccgucggaauuccgguca.....                                                                              | 4    | 0      | S04      |
| .....uuuccgucggaauuccCucaga.....                                                                             | 1    | 1      | S04      |
| .....uuuccgucggaauuccgucaga.....                                                                             | 5    | 0      | S04      |
| .....uuuccgucggaauuccgucagaa.....                                                                            | 1    | 0      | S04      |
| .....uuuccgucggaauuccgucagaau.....                                                                           | 8    | 0      | S04      |
| .....uuuccgucggaauuccgucagaaua.....                                                                          | 9    | 0      | S04      |
| .....uuuccgucggaauuccgucagaauac.....                                                                         | 5    | 0      | S04      |
| .....uuuccgucggaauuccgucagaauacc.....                                                                        | 3    | 0      | S04      |
| .....uuuccgucggaauuccgucagaau.....                                                                           | 6    | 0      | S04      |
| .....uuuccgucggaauuccgucagaaua.....                                                                          | 2    | 0      | S04      |
| .....uuuccgucggaauuccgucagaauac.....                                                                         | 1    | 0      | S04      |
| .....uuuccgucggaauuccgucagaauacc.....                                                                        | 20   | 0      | S04      |
| .....uuuccgucggaauuccgucagaauaUca.....                                                                       | 52   | 1      | S04      |
| .....uuuccgucggaauuccgucagaauacAa.....                                                                       | 2    | 1      | S04      |
| .....uuuccgucggaauuccgucagaGuacca.....                                                                       | 1    | 1      | S04      |
| .....uuuccgucggaauuccgucagaauacca.....                                                                       | 31   | 0      | S04      |
| .....uuuccgucggaauuccgucagaauaccCu.....                                                                      | 1    | 1      | S04      |
| .....uuuccgucggaauuccgucagaauaUcau.....                                                                      | 1    | 1      | S04      |
| .....uuuccgucggaauuccgucagaauaccu.....                                                                       | 4    | 0      | S04      |
| .....uuuccgucggaauuccgucagaauaccu.....                                                                       | 2    | 1      | S04      |
| .....uuuccgucggaauuccgucagaau.....                                                                           | 6    | 0      | S04      |
| .....uuuccgucggaauuccgucagaaua.....                                                                          | 2    | 0      | S04      |
| .....uuuccgucggaauuccgucagaauac.....                                                                         | 1    | 0      | S04      |
| .....uuuccgucggaauuccgucagaauacc.....                                                                        | 5    | 0      | S04      |
| .....uuuccgucggaauuccgucagaauacca.....                                                                       | 9    | 0      | S04      |
| .....uuuccgucggaauuccgucagaauaUca.....                                                                       | 16   | 1      | S04      |
| .....uuuccgucggaauuccgucagaaua.....                                                                          | 1    | 0      | S04      |
| .....uuuccgucggaauuccgucagaauaUca.....                                                                       | 3    | 1      | S04      |
| .....uuuccgucggaauuccgucagaauaccaGug.....                                                                    | 1    | 1      | S04      |
| .....uuuccgucggaauuccgucagaauacca.....                                                                       | 2    | 0      | S04      |
| .....uuuccgucggaauuccgucagaauaUca.....                                                                       | 3    | 1      | S04      |
| .....uuuccgucggaauuccgucagaauaccu.....                                                                       | 1    | 0      | S04      |







Provisional ID : chrC08\_2388707  
 Score total : 132.3  
 Score for star read(s) : 3.9  
 Score for read counts : 131.7  
 Score for mfe : -3.1  
 Score for randfold : 0  
 Score for cons. seed :  
 Total read count : 270  
 Mature read count : 269  
 Loop read count : 0  
 Star read count : 1

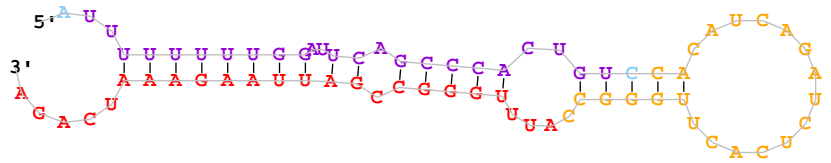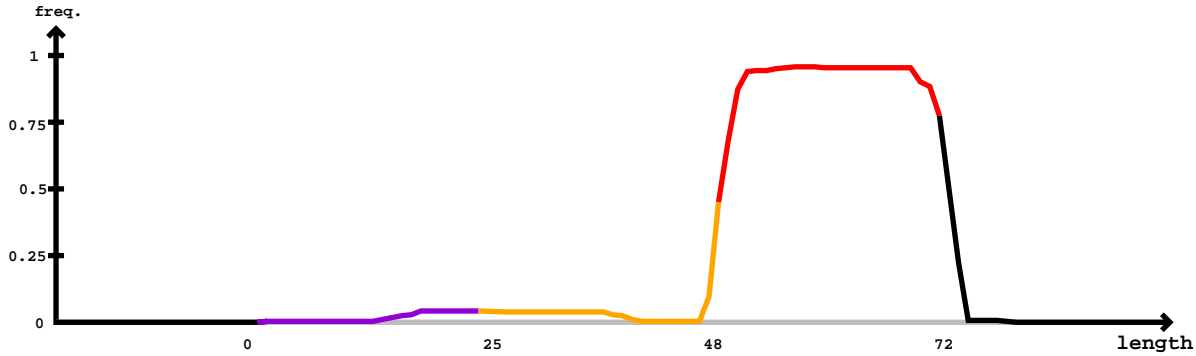

**Star**

**Mature**

| 5' -                                                                                                                                         | obs | reads | mm | sample |
|----------------------------------------------------------------------------------------------------------------------------------------------|-----|-------|----|--------|
| aacgcaucuauauugggcc <u>uuuuuuuuggauucagcccacugu</u> ccacaucagaucuca <u>cuugggcc</u> cauuugggccgauuaagaaaucagauccaa <u>uuucuacuuuuuuuuuuc</u> | -3' |       |    |        |
| aacgcaucuauauugggcc <u>uuuuuuuuggauucagcccacugu</u> ccacaucagaucuca <u>cuugggcc</u> cauuugggccgauuaagaaaucagauccaa <u>uuucuacuuuuuuuuuuc</u> | exp |       |    |        |
| .....((((((.....(((((((.....(((((((.....(((((((.....)))))).....)))))).....)))))).....)))))).....                                             |     |       |    |        |
| .....uuuuuuuuggauucagcccacugu.....                                                                                                           |     | 1     | 0  | S03    |
| .....ucagcccacuguccacauUgagau.....                                                                                                           |     | 1     | 1  | S03    |
| .....ucagcccacuguccacaAcagau.....                                                                                                            |     | 1     | 1  | S03    |
| .....cccacuguccacaucagauuc.....                                                                                                              |     | 1     | 0  | S03    |
| .....cccacuguccacaucaUaucuca.....                                                                                                            |     | 1     | 1  | S03    |
| .....cuugggccauuugggccgC.....                                                                                                                |     | 1     | 1  | S03    |
| .....cauuugggccgauuaagaaauc.....                                                                                                             |     | 1     | 0  | S03    |
| .....cauuugggccgauuaagaaaucag.....                                                                                                           |     | 7     | 0  | S03    |
| .....cauuugggccgauuaagaaaucac.....                                                                                                           |     | 1     | 1  | S03    |
| .....auuugggccgauuaagaaauc.....                                                                                                              |     | 1     | 0  | S03    |
| .....auuugggccgauuaagaaaucag.....                                                                                                            |     | 2     | 0  | S03    |
| .....auuugggccgauuaagaGaucaga.....                                                                                                           |     | 1     | 1  | S03    |
| .....auuugggccgauuaagaaaucac.....                                                                                                            |     | 1     | 1  | S03    |
| .....auuuUggccgauuaagaaaucaga.....                                                                                                           |     | 1     | 1  | S03    |
| .....auuuggccgauuaagaaaucaga.....                                                                                                            |     | 28    | 0  | S03    |
| .....uuuggccgauuaagaaauc.....                                                                                                                |     | 1     | 0  | S03    |
| .....uuuggccgauuaagaaaucaga.....                                                                                                             |     | 3     | 0  | S03    |
| .....uuuggccgauuaagaaaucagau.....                                                                                                            |     | 18    | 0  | S03    |
| .....uuuggccgauuaagaaaucagaC.....                                                                                                            |     | 2     | 1  | S03    |
| .....uuggccgauuaagaaauc.....                                                                                                                 |     | 1     | 0  | S03    |
| .....uuggccgauuaUgaaauc.....                                                                                                                 |     | 1     | 1  | S03    |
| .....uuggccgauuaUgaaaucag.....                                                                                                               |     | 1     | 1  | S03    |
| .....uuggccgauuaagaaaucag.....                                                                                                               |     | 1     | 0  | S03    |
| .....uuggccgauuaagaaaucagau.....                                                                                                             |     | 1     | 0  | S03    |
| .....uuggccgauuaagaaaucagau.....                                                                                                             |     | 19    | 0  | S03    |
| .....uuggccgauuaagaaaucagaGc.....                                                                                                            |     | 1     | 1  | S03    |
| .....uuggccgauuaUgaaaucagau.....                                                                                                             |     | 3     | 1  | S03    |
| .....uuggccgGuuaagaaaucagau.....                                                                                                             |     | 1     | 1  | S03    |
| .....uggccgauuaagaaaucaga.....                                                                                                               |     | 2     | 0  | S03    |
| .....uggccgauuaUgaaaucagau.....                                                                                                              |     | 1     | 1  | S03    |
| .....uggccgauuaagaaCucagau.....                                                                                                              |     | 1     | 1  | S03    |
| .....uggccgauuaagaaaucagau.....                                                                                                              |     | 3     | 0  | S03    |
| .....ccgauuaagaaaucagau.....                                                                                                                 |     | 1     | 0  | S03    |

Star

Mature

|                                                                                                                    |    |   |     |
|--------------------------------------------------------------------------------------------------------------------|----|---|-----|
| aacgcaucuaauuugggccauuuuuuuugggauucagcccacuguccacaucagaucacacugggccauuugggccgauuaagaaaucaucaaaauucuuacauuuuuuuuuuc |    |   |     |
| .....cgauuaagaaaucaucaaaau.....                                                                                    | 1  | 0 | S03 |
| .....cagcccacuguccacaucagauc.....                                                                                  | 1  | 0 | S04 |
| .....cagcccacuguccacaucagaucu.....                                                                                 | 1  | 0 | S04 |
| .....agcccacuguccacaucagaucuc.....                                                                                 | 2  | 0 | S04 |
| .....gcccacuguccacaucagaucucG.....                                                                                 | 1  | 1 | S04 |
| .....cccacuguccacaucagaucuc.....                                                                                   | 1  | 0 | S04 |
| .....cccacuguccacUucagaucuca.....                                                                                  | 1  | 1 | S04 |
| .....cauuugggccgauuaagaaauca.....                                                                                  | 2  | 0 | S04 |
| .....cauuugggccGuaaagaaauca.....                                                                                   | 1  | 1 | S04 |
| .....cauuugggccgauuaagaaaucaG.....                                                                                 | 14 | 0 | S04 |
| .....auuugggccgauuaagaaauca.....                                                                                   | 5  | 0 | S04 |
| .....auuugggccgauuaagaaauca.....                                                                                   | 1  | 0 | S04 |
| .....auuugggccgauuaagaaaucaG.....                                                                                  | 3  | 0 | S04 |
| .....auuugggccgauuaagaaaucaG.....                                                                                  | 3  | 1 | S04 |
| .....NuuugggccgauuaagaaaucaG.....                                                                                  | 1  | 1 | S04 |
| .....auuugggccgauuaagaaaucaG.....                                                                                  | 52 | 0 | S04 |
| .....auuugggccgauuaagaaaucaG.....                                                                                  | 1  | 0 | S04 |
| .....auuugggccgauuaagaaaucaGA.....                                                                                 | 1  | 1 | S04 |
| .....uuugggccgauuaagaaauca.....                                                                                    | 4  | 0 | S04 |
| .....uuugggccgauuaagaaauca.....                                                                                    | 1  | 0 | S04 |
| .....uuugggccgauuaagaaaucaG.....                                                                                   | 2  | 0 | S04 |
| .....uuugggccgauuaagaaaucaG.....                                                                                   | 6  | 0 | S04 |
| .....uuugggccgauuaagaaaucaG.....                                                                                   | 2  | 1 | S04 |
| .....uuUggccgauuaagaaaucaG.....                                                                                    | 1  | 1 | S04 |
| .....uuuggccgauuaGgaaaucaG.....                                                                                    | 1  | 1 | S04 |
| .....uuuggccgauuaagaaaucaG.....                                                                                    | 1  | 1 | S04 |
| .....uuuggccgauuaagGaaucagau.....                                                                                  | 1  | 1 | S04 |
| .....uuuggccgauuaagaaaucaG.....                                                                                    | 1  | 1 | S04 |
| .....uuuggccgauuaagaaaucaG.....                                                                                    | 20 | 0 | S04 |
| .....uuuggccgauuaagaaaucaG.....                                                                                    | 1  | 0 | S04 |
| .....uuuggccgauuaagaaaucaG.....                                                                                    | 2  | 0 | S04 |
| .....uuuggccgauuaagaaGucagau.....                                                                                  | 1  | 1 | S04 |
| .....uuuggccgauuaagaaaucaG.....                                                                                    | 23 | 0 | S04 |
| .....uggccgauuaagaaauca.....                                                                                       | 1  | 0 | S04 |
| .....uggccgauuaagaaaucaCa.....                                                                                     | 1  | 1 | S04 |
| .....uggccgauuaagaaaucaG.....                                                                                      | 3  | 0 | S04 |
| .....uggccgauuaagaaaucaG.....                                                                                      | 1  | 0 | S04 |
| .....uggccUauuaagaaaucaG.....                                                                                      | 1  | 1 | S04 |
| .....uggccgauuaagaaaucaG.....                                                                                      | 5  | 0 | S04 |
| .....ggccgauuaagaaaucaG.....                                                                                       | 1  | 0 | S04 |
| .....gccgauuaagaaaucaG.....                                                                                        | 1  | 0 | S04 |
| .....gccgauuaagaaaucaG.....                                                                                        | 1  | 0 | S04 |
| .....gccgauuaagaaaucaG.....                                                                                        | 1  | 0 | S04 |









Provisional ID : chrC08\_2419099  
 Score total : 0  
 Score for star read(s) : -1.3  
 Score for read counts : 0  
 Score for mfe : 1.2  
 Score for randfold : 0  
 Score for cons. seed :  
 Total read count : 20  
 Mature read count : 20  
 Loop read count : 0  
 Star read count : 0

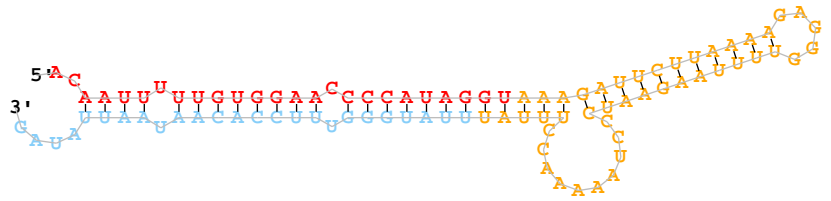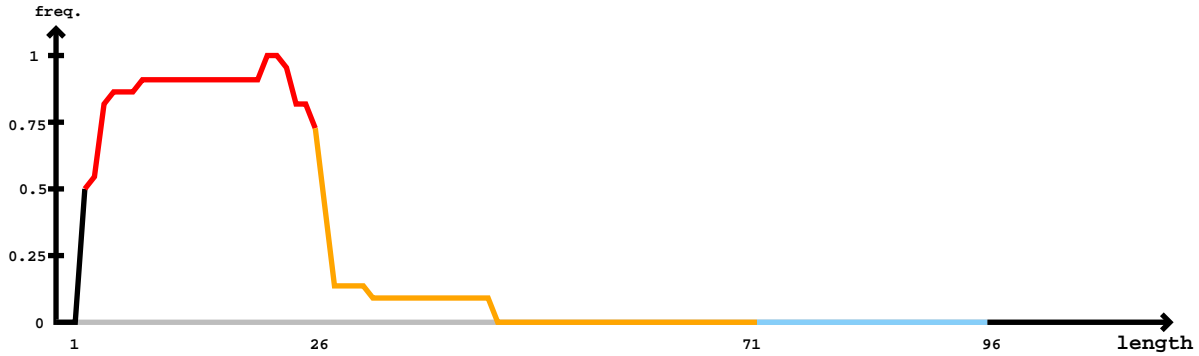

**Mature**

**Star**

| 5' -                                                                                                              | 3' | exp | reads | mm | sample |
|-------------------------------------------------------------------------------------------------------------------|----|-----|-------|----|--------|
| cacaauuuuuguggaaccccauagguaaagauucuuaaaagaggguuuuuagaaucccuaaaaaccuuuuuuuauuggguuuuccacaauuuuuuagaccccauuuuuuuaca |    |     |       |    |        |
| ...                                                                                                               |    |     |       |    |        |
| .acaauuuuuguggaaccccauaggu.                                                                                       |    |     | 1     | 0  | S03    |
| ...aaauuuuuguggaaccccauaggua.                                                                                     |    |     | 1     | 0  | S03    |
| ...auuuuuguggaaccccauaggu.                                                                                        |    |     | 1     | 0  | S03    |
| .....uuuguggaaccccauagguaaaga.                                                                                    |    |     | 1     | 0  | S03    |
| .....auagguaaagauucuuaaaagagg.                                                                                    |    |     | 2     | 0  | S03    |
|                                                                                                                   |    |     |       |    |        |
| .acaauuuuuguggaaccccauG.                                                                                          |    |     | 1     | 1  | S04    |
| .acaauuuuuguggaaccccaua.                                                                                          |    |     | 1     | 0  | S04    |
| .acaauuuuuguggaacUcauaggg.                                                                                        |    |     | 1     | 1  | S04    |
| .acaauuuuuguggaaccccauagGA.                                                                                       |    |     | 1     | 1  | S04    |
| .acaauuuuuguggaaccccauaggu.                                                                                       |    |     | 5     | 0  | S04    |
| .acaauCuuuguggaaccccauaggu.                                                                                       |    |     | 1     | 1  | S04    |
| ..caauuuuuguggaaccccaCa.                                                                                          |    |     | 1     | 1  | S04    |
| ...aaauuuuuguggaaccccau.                                                                                          |    |     | 1     | 0  | S04    |
| ...aaauuuuuguggaaccccauagC.                                                                                       |    |     | 1     | 1  | S04    |
| ...aaauuuuuguggaaccccauaggu.                                                                                      |    |     | 1     | 0  | S04    |
| ...aaauuuuuguggaacUcauaggua.                                                                                      |    |     | 2     | 1  | S04    |

Provisional ID : chrC08\_2429724  
 Score total : 0.2  
 Score for star read(s) : -1.3  
 Score for read counts : 0  
 Score for mfe : 1.5  
 Score for randfold : 0  
 Score for cons. seed :  
 Total read count : 146  
 Mature read count : 143  
 Loop read count : 0  
 Star read count : 3

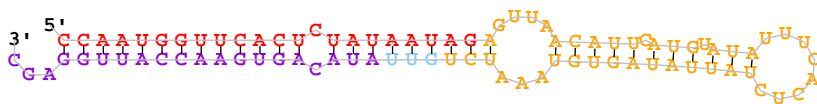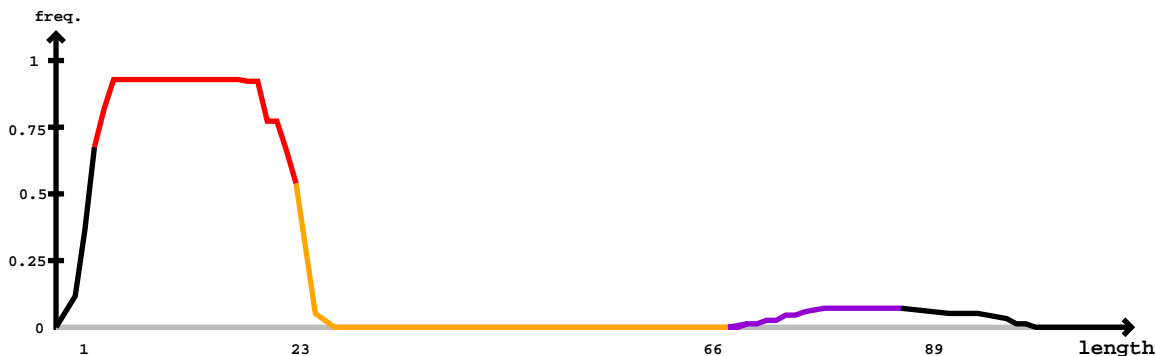

**Mature**

**Star**

| 5' -                                                                                                             | reads | mm | sample |
|------------------------------------------------------------------------------------------------------------------|-------|----|--------|
| cuccaaugguucacucuaauaauagaguuaacauucauguaauuuucacucuauuuauaguguaaaucuguuauacagugaaccauuggagcaaaaucaaccucuaauaaga | 1     | 0  | S03    |
| cuccaaugguucacucuaauaauagaguuaacauucauguaauuuucacucuauuuauaguguaaaucuguuauacagugaaccauuggagcaaaaucaaccucuaauaaga | 1     | 1  | S03    |
| (((.....(((.....)))))).....                                                                                      | 1     | 0  | S03    |
| .....                                                                                                            | 1     | 0  | S03    |
| .....Ca                                                                                                          | 1     | 0  | S03    |
| .....a                                                                                                           | 1     | 0  | S03    |
| .....aa                                                                                                          | 1     | 0  | S03    |
| .....aaag                                                                                                        | 2     | 0  | S03    |
| .....aaaga                                                                                                       | 1     | 0  | S03    |
| .....aGa                                                                                                         | 1     | 1  | S03    |
| .....a                                                                                                           | 5     | 0  | S03    |
| .....aa                                                                                                          | 2     | 0  | S03    |
| .....aaa                                                                                                         | 1     | 0  | S03    |
| .....aaaga                                                                                                       | 6     | 0  | S03    |
| .....aaaga                                                                                                       | 1     | 1  | S03    |
| .....a                                                                                                           | 5     | 0  | S03    |
| .....aa                                                                                                          | 1     | 0  | S03    |
| .....aaa                                                                                                         | 2     | 0  | S03    |
| .....aaaA                                                                                                        | 1     | 1  | S03    |
| .....aaag                                                                                                        | 9     | 0  | S03    |
| .....aaaga                                                                                                       | 1     | 0  | S03    |
| .....aaagag                                                                                                      | 2     | 0  | S03    |
| .....aaag                                                                                                        | 2     | 0  | S03    |
| .....aaag                                                                                                        | 1     | 1  | S03    |
| .....aaaga                                                                                                       | 4     | 0  | S03    |
| .....aaagaU                                                                                                      | 1     | 1  | S03    |
| .....aa                                                                                                          | 1     | 0  | S03    |
| .....aaaga                                                                                                       | 7     | 0  | S03    |
| .....aaagaU                                                                                                      | 1     | 1  | S03    |
| .....auacagugaaccauuggagc                                                                                        | 2     | 0  | S03    |
| .....acagugaaccauuggagU                                                                                          | 1     | 1  | S03    |
| .....aUagugaaccauuggagcaaauc                                                                                     | 1     | 1  | S03    |
| .....agugaaccauuggagcaaauc                                                                                       | 1     | 0  | S03    |
| .....agugaaccauuggagcaaauc                                                                                       | 1     | 0  | S03    |
| .....agugaaccauuggagcaaauc                                                                                       | 1     | 0  | S03    |

Mature

Star

cuccaaugguucacucuaaaagaguuaacauucauguaauuuuacucuaauuuaguguaaaucuguaauacagugaaccauuggagcaaaaucaaccuuaauaaga

|                                   |   |   |     |
|-----------------------------------|---|---|-----|
| cuccaaugguucacucuaUG.....         | 1 | 1 | S04 |
| cuccaaugguucacucuaaa.....         | 1 | 0 | S04 |
| cuccaaugguucacucuaaaau.....       | 5 | 0 | S04 |
| cuccaaugguucacucuaaaaua.....      | 1 | 0 | S04 |
| cuccaaugguucacucuaaaauag.....     | 1 | 0 | S04 |
| cuccaaugguucacucuaaaauaga.....    | 1 | 0 | S04 |
| .uccaaugguucacucuaaa.....         | 3 | 0 | S04 |
| .uccaaugguucacucuaCa.....         | 1 | 1 | S04 |
| .uccaaugguucacucuaaaau.....       | 5 | 0 | S04 |
| .uccaaugguucacucuaaaaua.....      | 2 | 0 | S04 |
| .uccaaugguucacucuaaaGa.....       | 1 | 1 | S04 |
| .uccaaugguucacucuaaaauU.....      | 2 | 1 | S04 |
| .uccaaugguucacucuaaaauaga.....    | 7 | 0 | S04 |
| .uccaaugguucacucuaaaauagG.....    | 1 | 1 | S04 |
| .cuaugguucacucuaaa.....           | 4 | 0 | S04 |
| .cuaugguucacucuaaaau.....         | 3 | 0 | S04 |
| .cuaugguucacucuaaaaua.....        | 7 | 0 | S04 |
| .cuaugguucGcucuaaaaua.....        | 1 | 1 | S04 |
| .cuaugguucGcucuaaaauag.....       | 1 | 1 | S04 |
| .cuaugguucacucuaaaauag.....       | 7 | 0 | S04 |
| .cuaugguucacucuaaaauaga.....      | 2 | 0 | S04 |
| .cuauggucacucuaaaauaga.....       | 1 | 1 | S04 |
| .cuaugguucacucuaaaauagag.....     | 1 | 0 | S04 |
| .caGugguucacucuaaaauag.....       | 1 | 1 | S04 |
| .caaugguucacucuaaaauag.....       | 4 | 0 | S04 |
| .caaugguucacucuaaaauagG.....      | 2 | 1 | S04 |
| .caaugguucacucuaaaauaga.....      | 4 | 0 | S04 |
| .caauggucacucuaaaauaga.....       | 1 | 1 | S04 |
| .caaugguucacucuaaaauagagu.....    | 1 | 0 | S04 |
| .Naaugguucacucuaaaauagagu.....    | 1 | 1 | S04 |
| .aaugguucacucuaaaauaga.....       | 7 | 0 | S04 |
| .aaugguucacucuaaaauagagu.....     | 1 | 0 | S04 |
| .....ugaaccauuggagcaaaaucaa.....  | 1 | 0 | S04 |
| .....ugaaUcauuggagcaaaaucaa.....  | 1 | 1 | S04 |
| .....gaaccauuggagcaaaaucaacG..... | 1 | 1 | S04 |
| .....aaccauuggagcaaaauUaac.....   | 1 | 1 | S04 |

















Star

Mature

| Sequence                                                                             | Star | Mature | Category |
|--------------------------------------------------------------------------------------|------|--------|----------|
| uaauuuucagauaugaguagacuuuggaagauuuuucagaagaguuuuggaagacucucagaaacucucggaagacucucuggc | 3    | 0      | S03      |
| . . . . . auaugaguagacuuugga . . . . .                                               | 1    | 1      | S03      |
| . . . . . auGugaguagacuuugga . . . . .                                               | 1    | 0      | S03      |
| . . . . . auaugaguagacuuuggaag . . . . .                                             | 1    | 1      | S03      |
| . . . . . auaugaguagacuuuggaagU . . . . .                                            | 16   | 0      | S03      |
| . . . . . auaugaguagacuuuggaaga . . . . .                                            | 1    | 1      | S03      |
| . . . . . auaugaguagacuuuggaagC . . . . .                                            | 2    | 1      | S03      |
| . . . . . auaugaguagacuuuggaagG . . . . .                                            | 1    | 1      | S03      |
| . . . . . auaugaguagacuuuggaagaC . . . . .                                           | 3    | 0      | S03      |
| . . . . . auaugaguagacuuuggaagau . . . . .                                           | 1    | 1      | S03      |
| . . . . . Cuaugaguagacuuuggaagauu . . . . .                                          | 2    | 1      | S03      |
| . . . . . auaugaguagacuuuggaagaCu . . . . .                                          | 1    | 1      | S03      |
| . . . . . auaugaguagacuuuggaagauu . . . . .                                          | 4    | 1      | S03      |
| . . . . . auaugaguagacuuuggaagauA . . . . .                                          | 2    | 1      | S03      |
| . . . . . auaugaguagacuuuggaagauu . . . . .                                          | 115  | 0      | S03      |
| . . . . . auaugaguagacuuuggaagauC . . . . .                                          | 11   | 1      | S03      |
| . . . . . auaugaguagacuuuggGagauu . . . . .                                          | 1    | 1      | S03      |
| . . . . . aCaugaguagacuuuggaagauu . . . . .                                          | 1    | 1      | S03      |
| . . . . . auaugaguagacuuuggaagauu . . . . .                                          | 1    | 1      | S03      |
| . . . . . auaugaguagacuuuggaGgauu . . . . .                                          | 1    | 1      | S03      |
| . . . . . auaugaguagacuuuggaagauuu . . . . .                                         | 2    | 0      | S03      |
| . . . . . uaugaguagacuuuggaagaC . . . . .                                            | 3    | 1      | S03      |
| . . . . . uaugaguagacuuuggaagau . . . . .                                            | 8    | 0      | S03      |
| . . . . . uaugaguagacuuuggaagaGu . . . . .                                           | 1    | 1      | S03      |
| . . . . . uaugaguagacuuuggaagauu . . . . .                                           | 29   | 0      | S03      |
| . . . . . uaugaguagacuuuggaagauC . . . . .                                           | 3    | 1      | S03      |
| . . . . . uaugaguagacuuuggaagauG . . . . .                                           | 2    | 1      | S03      |
| . . . . . uGugaguagacuuuggaagauuu . . . . .                                          | 1    | 1      | S03      |
| . . . . . uaAagaguagacuuuggaagauuu . . . . .                                         | 1    | 1      | S03      |
| . . . . . Gaugaguagacuuuggaagauuu . . . . .                                          | 1    | 1      | S03      |
| . . . . . uaugaguagacuuuggaagauuu . . . . .                                          | 1    | 1      | S03      |
| . . . . . uaugaguagacuuuggaagaCuu . . . . .                                          | 1    | 1      | S03      |
| . . . . . uaugaguagacuuuggaagauuC . . . . .                                          | 6    | 1      | S03      |
| . . . . . uaugaguagacuuuggaagauuu . . . . .                                          | 32   | 0      | S03      |
| . . . . . augaguagacuuuggaGga . . . . .                                              | 1    | 1      | S03      |
| . . . . . augaguagacuuuggaagU . . . . .                                              | 1    | 1      | S03      |
| . . . . . augaguagacuuuggaagau . . . . .                                             | 2    | 0      | S03      |
| . . . . . augaguuAacuuuggaagauu . . . . .                                            | 1    | 1      | S03      |
| . . . . . augaguuagacuuuggaagauu . . . . .                                           | 33   | 0      | S03      |
| . . . . . augaguagacuuuggaagauC . . . . .                                            | 2    | 1      | S03      |
| . . . . . augCguuagacuuuggaagauu . . . . .                                           | 1    | 1      | S03      |
| . . . . . augaguagacuuuggGagauu . . . . .                                            | 1    | 1      | S03      |
| . . . . . Cugaguagacuuuggaagauu . . . . .                                            | 1    | 1      | S03      |
| . . . . . augaguagacuuuggaagauuA . . . . .                                           | 3    | 1      | S03      |
| . . . . . augaguuagacuuuggaagauuu . . . . .                                          | 11   | 0      | S03      |
| . . . . . augaguagacuuuggUagauuu . . . . .                                           | 1    | 1      | S03      |
| . . . . . augaguagacuuuggaagauuuA . . . . .                                          | 1    | 1      | S03      |
| . . . . . augaguagacuuuggaagauuuu . . . . .                                          | 1    | 0      | S03      |
| . . . . . ugaguagacuuuggaagau . . . . .                                              | 1    | 0      | S03      |
| . . . . . ugaguagacuuuggaagauA . . . . .                                             | 1    | 1      | S03      |
| . . . . . ugaguagacuuuggaagauu . . . . .                                             | 2    | 0      | S03      |
| . . . . . ugaguagacuuuggaagaGu . . . . .                                             | 1    | 1      | S03      |
| . . . . . ugaguagacuuuggaagauC . . . . .                                             | 2    | 1      | S03      |
| . . . . . ugaguagacuuuggGagauu . . . . .                                             | 1    | 1      | S03      |
| . . . . . uCaguagacuuuggaagauuu . . . . .                                            | 1    | 1      | S03      |
| . . . . . ugaguagacuuuggaagauuu . . . . .                                            | 4    | 0      | S03      |
| . . . . . ugGguuagacuuuggaagauuu . . . . .                                           | 1    | 1      | S03      |
| . . . . . ugaguagacuuuggaagauuuA . . . . .                                           | 1    | 1      | S03      |
| . . . . . ugaguagacuuuggaagauuuu . . . . .                                           | 1    | 0      | S03      |
| . . . . . gaguuagacuuuggaagauu . . . . .                                             | 3    | 0      | S03      |
| . . . . . gaguuagacuuuggaagauC . . . . .                                             | 1    | 1      | S03      |
| . . . . . gaguuagacuuuggaagauuu . . . . .                                            | 3    | 0      | S03      |
| . . . . . gaguuagacuuuggaagauuG . . . . .                                            | 1    | 1      | S03      |
| . . . . . aguuagacuuuggaagauC . . . . .                                              | 1    | 1      | S03      |
| . . . . . aguuagacuuuggaagauu . . . . .                                              | 5    | 0      | S03      |
| . . . . . aguuagacuuuggaagauuu . . . . .                                             | 1    | 0      | S03      |
| . . . . . aguuagacuuuggaagauuuuA . . . . .                                           | 1    | 1      | S03      |
| . . . . . guuagacuuuggGagauu . . . . .                                               | 1    | 1      | S03      |
| . . . . . uuagacuuuggaagauuuuuU . . . . .                                            | 1    | 1      | S03      |
| . . . . . agacuuuggaagauuuuucGgaa . . . . .                                          | 1    | 1      | S03      |

Star

Mature

uuuuuuucagauaugaguauagacuuuggaagauuuucagaaagaguuuuggaagacucucagaaacucucggaagacucucugggagacucagaaacucucggaagacucucuggc

|                                      |     |   |     |
|--------------------------------------|-----|---|-----|
| .....uuggaaCacucucagaaacucucg.....   | 1   | 1 | S03 |
| .....aagacucucagaaacucucggaA.....    | 1   | 1 | S03 |
| .....agacucucagaaacucucgAaaga.....   | 1   | 1 | S03 |
| .....gacucucagaaacucucgAaag.....     | 1   | 1 | S03 |
| .....Cacucucagaaacucucggaagac.....   | 1   | 1 | S03 |
| .....ucucagaaacucucgUaagacucu.....   | 1   | 1 | S03 |
| .....ucucagaaacucucggaagacucu.....   | 1   | 0 | S03 |
| .....cucagaaacucucgCaagacuc.....     | 2   | 1 | S03 |
| .....ucagaaacucucggaagacu.....       | 2   | 0 | S03 |
| .....ucagaaacucucggaagacucu.....     | 2   | 0 | S03 |
| .....ucagaaUcucucggaagacucuug.....   | 2   | 1 | S03 |
| .....agaaacucucggaagacucuuggc.....   | 2   | 0 | S03 |
| .....gaaacucucggaagacucu.....        | 2   | 0 | S03 |
| .....aaacucucggaagacucuuggcaU.....   | 1   | 1 | S03 |
| .....aaacucucggaagacucuuggcag.....   | 3   | 0 | S03 |
| .....aacucucggaagacucuuggca.....     | 1   | 0 | S03 |
| .....aacucucggaagacucuuggcaga.....   | 2   | 0 | S03 |
| .....acucucggaagacCcuuggcagac.....   | 1   | 1 | S03 |
| .....acucucggaagacucuuggcagacu.....  | 1   | 0 | S03 |
| .....cucucggaagacucuuggcagacC.....   | 1   | 1 | S03 |
| .....cucucggaagacucuuggcagacu.....   | 2   | 0 | S03 |
| .....ucucggaagacucuuggcagacG.....    | 1   | 1 | S03 |
| .....cggaagacucuuggcagacu.....       | 1   | 0 | S03 |
| .....cgUaagacucuuggcagacucaga.....   | 1   | 1 | S03 |
| .....cggaagacucuuggcagacucaga.....   | 2   | 0 | S03 |
| .....ggaagacucuuggcagacucagaa.....   | 1   | 0 | S03 |
| .....ggaagacCcuuggcagacucagaa.....   | 1   | 1 | S03 |
| .....gaagacucuuggcagacA.....         | 1   | 1 | S03 |
| .....gaagacucuuggcagacu.....         | 1   | 0 | S03 |
| .....aagacucuuggcagacuc.....         | 1   | 0 | S03 |
| .....aagacucuuggcagacucG.....        | 1   | 1 | S03 |
| .....aagacucuuggcagacucagaga.....    | 7   | 0 | S03 |
| .....aagacucuuggcagGcucaga.....      | 1   | 1 | S03 |
| .....aagacucuuggcagacucagG.....      | 2   | 1 | S03 |
| .....aagacucuuggcagacucagGa.....     | 1   | 1 | S03 |
| .....aagacucuuggcagacucagaa.....     | 6   | 0 | S03 |
| .....aagacucuuggcagacucagaaa.....    | 3   | 0 | S03 |
| .....aagacucuuggcagacucUgaaac.....   | 1   | 1 | S03 |
| .....aagacucuuggcagacucagaaaA.....   | 1   | 1 | S03 |
| .....aagacucuuggcagacucagaaaU.....   | 1   | 1 | S03 |
| .....aagacucuuggAagacucagaaac.....   | 1   | 1 | S03 |
| .....aagacucuuggcagacucagaGac.....   | 1   | 1 | S03 |
| .....aagacucuuggcagacucagaaac.....   | 39  | 0 | S03 |
| .....aagacucuuggcagacucagaaacu.....  | 1   | 0 | S03 |
| .....aagacucuuggcagacucagaaacC.....  | 1   | 1 | S03 |
| .....agacucuuggcagacucG.....         | 1   | 1 | S03 |
| .....agacucuuggcagacucag.....        | 1   | 0 | S03 |
| .....agacucuuggcagacucagaga.....     | 2   | 0 | S03 |
| .....agacucuuggcagacucagaa.....      | 5   | 0 | S03 |
| .....agacucuuggcagacucagaa.....      | 5   | 0 | S03 |
| .....agacucuuggcagacucagaCa.....     | 1   | 1 | S03 |
| .....agaUucuggcagacucagaa.....       | 1   | 1 | S03 |
| .....agacucuuggcagacucagaaaU.....    | 3   | 1 | S03 |
| .....agacucuuggcagacucagaaaA.....    | 1   | 1 | S03 |
| .....agacucuuggcagacucagaaac.....    | 3   | 0 | S03 |
| .....agacucuUggcagacucagaaacu.....   | 1   | 1 | S03 |
| .....agacCcuuggcagacucagaaacu.....   | 1   | 1 | S03 |
| .....agacuUuuggcagacucagaaacu.....   | 1   | 1 | S03 |
| .....agacucuuggcagagaAucagaaacu..... | 1   | 1 | S03 |
| .....agacucuuggcagacucagaaacu.....   | 246 | 0 | S03 |
| .....agacucuuggUagacucagaaacu.....   | 3   | 1 | S03 |
| .....aCacucuuggcagacucagaaacu.....   | 1   | 1 | S03 |
| .....agacucuuggcagacucagaaacA.....   | 10  | 1 | S03 |
| .....Ggacucuuggcagacucagaaacu.....   | 1   | 1 | S03 |
| .....agGcucuuggcagacucagaaacu.....   | 1   | 1 | S03 |
| .....agacucuUgcagacucagaaacu.....    | 1   | 1 | S03 |
| .....agacucuuggcagacucGgaaacu.....   | 2   | 1 | S03 |
| .....agacucuuggcagacAcagaaacu.....   | 1   | 1 | S03 |
| .....agacucuuggcagacucagaaaUu.....   | 1   | 1 | S03 |

Star

Mature

uuuuuuucagauaugaguuagacuuuggaaguuuuucagaaagaguuuuggaagacucucagaaacucucgggaagacucucugggcagacucagaaacucucggaagacucucuggc

|                                                |    |   |     |
|------------------------------------------------|----|---|-----|
| . . . . .agacucucugggcagacucagaaacG. . . . .   | 8  | 1 | S03 |
| . . . . .agacucuuAgcagacucagaaacU. . . . .     | 3  | 1 | S03 |
| . . . . .agacucucugggcagacucagaaacC. . . . .   | 36 | 1 | S03 |
| . . . . .agacucucugggcagacucagGaacU. . . . .   | 1  | 1 | S03 |
| . . . . .agacucucugggcagacucagGacu. . . . .    | 1  | 1 | S03 |
| . . . . .agacucucugggcagacucagaaacUA. . . . .  | 2  | 1 | S03 |
| . . . . .agacucucugggcagacucagaaacucU. . . . . | 1  | 1 | S03 |
| . . . . .gacucucugggcagacucagaaacC. . . . .    | 1  | 1 | S03 |
| . . . . .gacucucugggcagacucagaaacA. . . . .    | 1  | 1 | S03 |
| . . . . .gacucucugggcagacucagaaacu. . . . .    | 9  | 0 | S03 |
| . . . . .gacucucugggcagacucagaaacUG. . . . .   | 2  | 1 | S03 |
| . . . . .gacucucugggcagacucagaaacuc. . . . .   | 1  | 0 | S03 |
| . . . . .acucucugggcagacucaga. . . . .         | 2  | 0 | S03 |
| . . . . .acucucugggcagacucagaU. . . . .        | 1  | 1 | S03 |
| . . . . .acucucugggcagacucagaaa. . . . .       | 1  | 0 | S03 |
| . . . . .acucucugggcagacucagaaac. . . . .      | 1  | 0 | S03 |
| . . . . .acucucugggcagacucagaaacu. . . . .     | 5  | 0 | S03 |
| . . . . .acucucugggcagacucagaaacGcu. . . . .   | 1  | 1 | S03 |
| . . . . .acucucugggcagacucagaaacC. . . . .     | 1  | 1 | S03 |
| . . . . .acucucugggcagacucGgaaacu. . . . .     | 1  | 1 | S03 |
| . . . . .acucucugggcagacucagaaacUG. . . . .    | 1  | 1 | S03 |
| . . . . .cucucugggcagacucagaa. . . . .         | 2  | 0 | S03 |
| . . . . .cucucugggcagacucagGa. . . . .         | 1  | 1 | S03 |
| . . . . .cucucugggcagacucagaaaU. . . . .       | 1  | 1 | S03 |
| . . . . .cucucugggcagacucagaaac. . . . .       | 1  | 0 | S03 |
| . . . . .cucucugggcagacucagaaacu. . . . .      | 9  | 0 | S03 |
| . . . . .cucucugggcagacucagaaacA. . . . .      | 1  | 1 | S03 |
| . . . . .cucucugggcagacucagaaacC. . . . .      | 1  | 1 | S03 |
| . . . . .cucucugggcagacucagaaacG. . . . .      | 1  | 1 | S03 |
| . . . . .ucucugggcagacucagaaacC. . . . .       | 1  | 1 | S03 |
| . . . . .ucucugggcagacucagaaacu. . . . .       | 8  | 0 | S03 |
| . . . . .ucucugggcagacucagaaacuUucg. . . . .   | 6  | 1 | S03 |
| . . . . .cucugggcagacucagaaac. . . . .         | 1  | 0 | S03 |
| . . . . .cucugggcagacucagaaacu. . . . .        | 2  | 0 | S03 |
| . . . . .cucugggcagacucagaaacuUucg. . . . .    | 12 | 1 | S03 |
| . . . . .ucugggcagacucagaaacuUucg. . . . .     | 1  | 1 | S03 |
| . . . . .gcagacucagaaacuUucg. . . . .          | 1  | 1 | S03 |
| . . . . .cagacucagaaacuUucg. . . . .           | 1  | 1 | S03 |
| . . . . .cagacucagaaacucucAgaag. . . . .       | 2  | 1 | S03 |
| . . . . .cagacucagaaacucucAgaagac. . . . .     | 1  | 1 | S03 |
| . . . . .agacucagaaacuUucgga. . . . .          | 1  | 1 | S03 |
| . . . . .agacucagaaacuUucggaagacu. . . . .     | 1  | 1 | S03 |
| . . . . .agacucagaaacucucggaagacu. . . . .     | 1  | 0 | S03 |
| . . . . .agacucagaaacucucggaagacA. . . . .     | 1  | 1 | S03 |
| . . . . .acucagaaacucucAgaagacucuc. . . . .    | 2  | 1 | S03 |
| . . . . .acucagaaacuUucggaagacucuc. . . . .    | 1  | 1 | S03 |
| . . . . .cucagaaacucucgCaagacuc. . . . .       | 2  | 1 | S03 |
| . . . . .ucagaaacucucggaagacu. . . . .         | 2  | 0 | S03 |
| . . . . .ucagaaacucucggaagacucuc. . . . .      | 2  | 0 | S03 |
| . . . . .ucagaaacucucggaagacucucug. . . . .    | 4  | 0 | S03 |
| . . . . .ucagaaUcucucggaagacucucug. . . . .    | 2  | 1 | S03 |
| . . . . .agaaacucucggaagacucucuggc. . . . .    | 2  | 0 | S03 |
| . . . . .gaaacucucggaagacucuc. . . . .         | 2  | 0 | S03 |
|                                                |    |   |     |
| . . . . .uuuuucagauaugaguuagacuuugg. . . . .   | 1  | 0 | S04 |
| . . . . .uuuuucagauaugaguuagacuuugg. . . . .   | 1  | 0 | S04 |
| . . . . .cagauaugaguuagacuuugg. . . . .        | 2  | 0 | S04 |
| . . . . .cagauaugaguuagacuuugg. . . . .        | 3  | 0 | S04 |
| . . . . .cagauaugaguuagacuuuggaa. . . . .      | 2  | 0 | S04 |
| . . . . .cagauaugaguuagacuuuggaaC. . . . .     | 1  | 1 | S04 |
| . . . . .cagauaugaguuagacuuuggaag. . . . .     | 43 | 0 | S04 |
| . . . . .cagauaugaguuagacuuuggGag. . . . .     | 1  | 1 | S04 |
| . . . . .caUauaugaguuagacuuuggaag. . . . .     | 1  | 1 | S04 |
| . . . . .cagaGaugaguuagacuuuggaag. . . . .     | 2  | 1 | S04 |
| . . . . .agauaugaguuagacuuugg. . . . .         | 1  | 0 | S04 |
| . . . . .agauaugaguuagacuuugga. . . . .        | 5  | 0 | S04 |
| . . . . .agauaugaguuagacuuuggG. . . . .        | 2  | 1 | S04 |
| . . . . .agauaugaguuagacuuuggaa. . . . .       | 1  | 0 | S04 |
| . . . . .agauaugaguuagacuuuggaag. . . . .      | 7  | 0 | S04 |
| . . . . .agauaugagCuagacuuuggaaga. . . . .     | 1  | 1 | S04 |

Star

Mature

|                                                                                                          |    |   |     |
|----------------------------------------------------------------------------------------------------------|----|---|-----|
| uuuuuuucagauaugaguugacuuuggaagauuuuucagaagaguuuuggaagacucucagaacucucggaagacucucagaaacucucggaagacucucuggc |    |   |     |
| ..... agauaugaguugacuuuggaaga                                                                            | 49 | 0 | S04 |
| ..... aUauaugaguugacuuuggaaga                                                                            | 1  | 1 | S04 |
| ..... agauaugaguugacuuuggaagG                                                                            | 1  | 1 | S04 |
| ..... gauaugaguugacuuuggaag                                                                              | 2  | 0 | S04 |
| ..... gauaugaguugacuuuggaaga                                                                             | 4  | 0 | S04 |
| ..... gauaugaguugacuuuggaagau                                                                            | 11 | 0 | S04 |
| ..... gauaugagCuagacuuuggaagau                                                                           | 1  | 1 | S04 |
| ..... gauaugaguugacuuuggaagauC                                                                           | 1  | 1 | S04 |
| ..... gauaugaguugacuuuggaagauu                                                                           | 2  | 0 | S04 |
| ..... gauaugaguugacuuuggaagauA                                                                           | 1  | 1 | S04 |
| ..... auaugaguugacuuugga                                                                                 | 1  | 0 | S04 |
| ..... auaugaguugacuuuggaag                                                                               | 2  | 0 | S04 |
| ..... auaugaguugacCuuggaaga                                                                              | 1  | 1 | S04 |
| ..... auaugaguugacuuuggaaga                                                                              | 5  | 0 | S04 |
| ..... auaugaguugacuuuggaagaC                                                                             | 1  | 1 | S04 |
| ..... auaugaguugacuuugAagauu                                                                             | 1  | 1 | S04 |
| ..... auaugaguugacuuuggaagaCu                                                                            | 1  | 1 | S04 |
| ..... auaugaguugacuuuggaagauu                                                                            | 66 | 0 | S04 |
| ..... auaugaguugacuuuggaagauA                                                                            | 1  | 1 | S04 |
| ..... auaugaguugacuuuggUagauu                                                                            | 1  | 1 | S04 |
| ..... auuacgaguugacuuuggaagauu                                                                           | 1  | 1 | S04 |
| ..... auaugagCuagacuuuggaagauu                                                                           | 1  | 1 | S04 |
| ..... aCaugaguugacuuuggaagauu                                                                            | 1  | 1 | S04 |
| ..... auaugaguugacuuuggaagauC                                                                            | 4  | 1 | S04 |
| ..... auaugaguugacuuuggaagauG                                                                            | 2  | 1 | S04 |
| ..... uaugaguugacuuuggaag                                                                                | 1  | 0 | S04 |
| ..... uaugaguugacuuuggaagau                                                                              | 3  | 0 | S04 |
| ..... Caugaguugacuuuggaagauu                                                                             | 1  | 1 | S04 |
| ..... uUugaguugacuuuggaagauu                                                                             | 1  | 1 | S04 |
| ..... uaugaguugacuuuggaagauG                                                                             | 1  | 1 | S04 |
| ..... uaugaguugacuuuggGagauu                                                                             | 1  | 1 | S04 |
| ..... uaugaguugacuuuggaagauC                                                                             | 2  | 1 | S04 |
| ..... uaugaguugacuuugAagauu                                                                              | 1  | 1 | S04 |
| ..... uaugaguugacuuuggaagauu                                                                             | 22 | 0 | S04 |
| ..... uaugaguugacuuuggaagauuu                                                                            | 23 | 0 | S04 |
| ..... uaugaguugacuuuggaagauuu                                                                            | 1  | 1 | S04 |
| ..... uaugaguugacuuuggaagauuG                                                                            | 1  | 1 | S04 |
| ..... uaugaguugacuuuggaagauuC                                                                            | 2  | 1 | S04 |
| ..... Auagaguugacuuuggaagauuu                                                                            | 1  | 1 | S04 |
| ..... augaguugacuuuggaa                                                                                  | 1  | 0 | S04 |
| ..... augaguugacuuuggaag                                                                                 | 1  | 0 | S04 |
| ..... augaguugacuuuggaagau                                                                               | 3  | 0 | S04 |
| ..... augaguugacuuuggaagauG                                                                              | 1  | 1 | S04 |
| ..... augaguugacuuuggaagauC                                                                              | 4  | 1 | S04 |
| ..... augaguugacuuuggaGgauu                                                                              | 1  | 1 | S04 |
| ..... aCgaguugacuuuggaagauu                                                                              | 1  | 1 | S04 |
| ..... augaguugacuuuggaagauu                                                                              | 21 | 0 | S04 |
| ..... augaguugacuuuggaagauA                                                                              | 1  | 1 | S04 |
| ..... augaguugUcuuuggaagauu                                                                              | 1  | 1 | S04 |
| ..... augaguugacuuuggaagauuu                                                                             | 10 | 0 | S04 |
| ..... augaguugacuuuggaagauuC                                                                             | 1  | 1 | S04 |
| ..... augaguugacuuuggaagauuG                                                                             | 1  | 1 | S04 |
| ..... augaguugacuuuggaagauuuA                                                                            | 3  | 1 | S04 |
| ..... augaguugacuuuggaagauuuu                                                                            | 1  | 0 | S04 |
| ..... uagaguugacuuuggaagauG                                                                              | 1  | 1 | S04 |
| ..... uagaguugacuuuggaagauu                                                                              | 4  | 0 | S04 |
| ..... uagaguugacuuuggaagauuu                                                                             | 6  | 0 | S04 |
| ..... uagaguugacuuuggaagauuuG                                                                            | 1  | 1 | S04 |
| ..... gaguuagacuuuggaagC                                                                                 | 1  | 1 | S04 |
| ..... gaguuagacuuuggaagau                                                                                | 1  | 0 | S04 |
| ..... gaguuagacuuuggaagauu                                                                               | 1  | 0 | S04 |
| ..... gaguuagacuuuggaagauA                                                                               | 1  | 1 | S04 |
| ..... gaguuagacuuuggaagauC                                                                               | 1  | 1 | S04 |
| ..... gaguuagacuuuggaagauuu                                                                              | 3  | 0 | S04 |
| ..... aguuagacuuuggaagauu                                                                                | 2  | 0 | S04 |
| ..... guuagacuuuggaagauu                                                                                 | 1  | 0 | S04 |
| ..... guuagacuuuggaagauuu                                                                                | 1  | 0 | S04 |
| ..... guuagacuuuggGagauu                                                                                 | 1  | 1 | S04 |
| ..... uuagacuuuggaagauuu                                                                                 | 1  | 0 | S04 |
| ..... uuagacuuuggaagauuuucaga                                                                            | 2  | 0 | S04 |



Star

Mature

uuuuuuucagauaugaguuaagacuuuuggaaguuuuucagagaaguuuuggaagacucucagaaacucucggaaagacucucuggcagacucagaaacucucggaagacucucuggc

|                                 |     |   |     |
|---------------------------------|-----|---|-----|
| .uggaaCacucucagaaacucucgg.....  | 1   | 1 | S04 |
| .aagacucucagaaacucucgg.....     | 1   | 0 | S04 |
| .aagacucucagaaacucucggaag.....  | 1   | 0 | S04 |
| .agacucucagaaacucucgg.....      | 1   | 0 | S04 |
| .agacucucagaaacucucggaag.....   | 1   | 0 | S04 |
| .ucagaaacucucggaagacu.....      | 1   | 0 | S04 |
| .ucagaaacucucgCaagacu.....      | 2   | 1 | S04 |
| .ucagaaacucucggaagacucuu.....   | 2   | 0 | S04 |
| .ucagaaacucucggaagacucuuug..... | 2   | 0 | S04 |
| .cagaaacucucggaagacuAuugg.....  | 2   | 1 | S04 |
| .agaaacucucgCaagacucuuugc.....  | 2   | 1 | S04 |
| .agaaacucucggaagacucuuugc.....  | 2   | 0 | S04 |
| .acucucggaagacucuuugc.....      | 1   | 0 | S04 |
| .acucucgUaagacucuuugc.....      | 1   | 1 | S04 |
| .acucucggCagacucuuugcagac.....  | 1   | 1 | S04 |
| .acucucggaagacucuuugcagac.....  | 1   | 0 | S04 |
| .cucucgUaagacucuuugc.....       | 1   | 1 | S04 |
| .cucucggaagacucuuugcagacu.....  | 1   | 0 | S04 |
| .cucucgUaagacucuuugcagacu.....  | 1   | 1 | S04 |
| .cucucggaagacucuuugcagacuc..... | 1   | 0 | S04 |
| .ucucggaagacucuuugcagacu.....   | 1   | 0 | S04 |
| .ucucggaagacucuuugcagacA.....   | 1   | 1 | S04 |
| .cucggaagUcucuuugcagacu.....    | 1   | 1 | S04 |
| .cucggaagacucuuugcagacuG.....   | 1   | 1 | S04 |
| .ucggaagacucuuugcagacu.....     | 2   | 0 | S04 |
| .gaagacucuuugcagacA.....        | 1   | 1 | S04 |
| .gaagacucuuugcagacu.....        | 1   | 0 | S04 |
| .gaagacucuuugcagacG.....        | 1   | 1 | S04 |
| .gaagacucuuugcagacuAa.....      | 1   | 1 | S04 |
| .Naagacucuuugcagacucagaa.....   | 1   | 1 | S04 |
| .gaagacucuuugcagacucagaa.....   | 1   | 0 | S04 |
| .gaagacucuuugcagGcucagaaa.....  | 1   | 1 | S04 |
| .aagacucuuugcagacuca.....       | 4   | 0 | S04 |
| .aagacucuuugcagacucaga.....     | 8   | 0 | S04 |
| .aGgacucuuugcagacucaga.....     | 1   | 1 | S04 |
| .aagacucuuugcagacucagaa.....    | 3   | 0 | S04 |
| .aagacucuuugcagacucagaaa.....   | 1   | 0 | S04 |
| .aagacucuuugcagacucagaaaA.....  | 1   | 1 | S04 |
| .aagacucuuugcagacucagaaaU.....  | 2   | 1 | S04 |
| .Gagacucuuugcagacucagaaac.....  | 1   | 1 | S04 |
| .aagacucuuugcagacucagaaGc.....  | 1   | 1 | S04 |
| .aagacucuuugcagacucagaaac.....  | 30  | 0 | S04 |
| .aagacucuuAgcagacucagaaac.....  | 1   | 1 | S04 |
| .aagacucuuugcagacucagaaacA..... | 1   | 1 | S04 |
| .aagacucuuugcagacucagaaacu..... | 2   | 0 | S04 |
| .agacucuuugcagacuca.....        | 1   | 0 | S04 |
| .agacucuuugcagacucag.....       | 2   | 0 | S04 |
| .agacucuuugcagacucaga.....      | 4   | 0 | S04 |
| .agacucuuugcagacucagaa.....     | 4   | 0 | S04 |
| .agacucuuugcagacucagaG.....     | 1   | 1 | S04 |
| .agacucuuugcagacucagaaa.....    | 3   | 0 | S04 |
| .agacucuuugcagacucagaaac.....   | 4   | 0 | S04 |
| .agacucuuAgcagacucagaaacu.....  | 1   | 1 | S04 |
| .agacucuuugcagacucGgaaacu.....  | 1   | 1 | S04 |
| .agacucuuAgcagacucagaaacu.....  | 1   | 1 | S04 |
| .agacucuuugcagacCcagaaacu.....  | 1   | 1 | S04 |
| .agacucuuugcagacucagaaacG.....  | 14  | 1 | S04 |
| .agacucuuugcagacucagaaacC.....  | 27  | 1 | S04 |
| .agacucuuugcGgacucagaaacu.....  | 1   | 1 | S04 |
| .agacucuuugcagacucagaaacu.....  | 163 | 0 | S04 |
| .agacucuuugcagacucagaaacA.....  | 10  | 1 | S04 |
| .agacucCuggcagacucagaaacu.....  | 1   | 1 | S04 |
| .Ggacucuuugcagacucagaaacu.....  | 2   | 1 | S04 |
| .agacucuuugUagacucagaaacu.....  | 4   | 1 | S04 |
| .aUacucuuugcagacucagaaacu.....  | 1   | 1 | S04 |
| .gacucuuugcagacucagaaac.....    | 1   | 0 | S04 |
| .Uacucuuugcagacucagaaac.....    | 1   | 1 | S04 |
| .gacucuuugcagacucagaaacA.....   | 2   | 1 | S04 |
| .gacucuuugcagacucagaaacu.....   | 5   | 0 | S04 |
| .gacucuuugcagacucagaaacA.....   | 1   | 1 | S04 |

Star

Mature

|                                                                                                                     |   |   |     |
|---------------------------------------------------------------------------------------------------------------------|---|---|-----|
| uuuuuuucagauaugaguuagacuuuggaagauuuuucagagaguuuuggaagacucucagaaacucucggaagacucucuggcagacucagaaacucucggaagacucucuggc |   |   |     |
| .....gacucucuggcagacucagaaacuc.....                                                                                 | 1 | 0 | S04 |
| .....acucucuggcagacucaga.....                                                                                       | 1 | 0 | S04 |
| .....acucucuggcagacucagaaa.....                                                                                     | 2 | 0 | S04 |
| .....acucucuggcagacucagaaa.....                                                                                     | 1 | 0 | S04 |
| .....acucucuggcagacucagaaacC.....                                                                                   | 1 | 1 | S04 |
| .....acucucuggcagacucagaaacA.....                                                                                   | 1 | 1 | S04 |
| .....acucucuggcagacucagaaacu.....                                                                                   | 8 | 0 | S04 |
| .....acucucuggcagacucagaaacuA.....                                                                                  | 1 | 1 | S04 |
| .....cucucuggcagacucagaaa.....                                                                                      | 3 | 0 | S04 |
| .....cucucuggcaAacucagaaa.....                                                                                      | 1 | 1 | S04 |
| .....cucucuggcagacucagaaac.....                                                                                     | 3 | 0 | S04 |
| .....cucucuggcagacucagaaacu.....                                                                                    | 7 | 0 | S04 |
| .....cucucuggcagacucagaaacC.....                                                                                    | 1 | 1 | S04 |
| .....cucucuggcagacucagaaacA.....                                                                                    | 1 | 1 | S04 |
| .....ucucuggcagacucagaaacu.....                                                                                     | 8 | 0 | S04 |
| .....ucucuggcagacucagaaacuA.....                                                                                    | 1 | 1 | S04 |
| .....ucucuggcagacucagaaacC.....                                                                                     | 1 | 1 | S04 |
| .....ucucuggcagacucagaaacuUucg.....                                                                                 | 1 | 1 | S04 |
| .....cucuggcagacucagaaacu.....                                                                                      | 8 | 0 | S04 |
| .....cucuggcagacucagaaacC.....                                                                                      | 1 | 1 | S04 |
| .....cucuggcagacucagaaacuuc.....                                                                                    | 1 | 0 | S04 |
| .....cucuggcagacucagaaacuUucg.....                                                                                  | 5 | 1 | S04 |
| .....cucuggcagacucagaaacucucAg.....                                                                                 | 1 | 1 | S04 |
| .....ucuggcagacucagaaacucuc.....                                                                                    | 1 | 0 | S04 |
| .....ggcagacucagaaacucucgU.....                                                                                     | 1 | 1 | S04 |
| .....ggcagacucagaaacuUucggaag.....                                                                                  | 1 | 1 | S04 |
| .....gcagacucagaaacuUucg.....                                                                                       | 1 | 1 | S04 |
| .....cagacucagaaacuUucg.....                                                                                        | 1 | 1 | S04 |
| .....cagacucagaaacuUucggaag.....                                                                                    | 2 | 1 | S04 |
| .....agacucagaaacucucgga.....                                                                                       | 1 | 0 | S04 |
| .....agacucagaaacuUucgga.....                                                                                       | 1 | 1 | S04 |
| .....agacucagaaacucucAgaag.....                                                                                     | 1 | 1 | S04 |
| .....agacucagaaacucucAgaaga.....                                                                                    | 1 | 1 | S04 |
| .....agacucagaaacucucggaagacu.....                                                                                  | 1 | 0 | S04 |
| .....ucagaaacucucgCaagacu.....                                                                                      | 2 | 1 | S04 |
| .....ucagaaacucucggaagacucuu.....                                                                                   | 2 | 0 | S04 |
| .....ucagaaacucucggaagacucuu.....                                                                                   | 2 | 0 | S04 |
| .....cagaaacucucggaagacuAuugg.....                                                                                  | 2 | 1 | S04 |
| .....agaaacucucgCaagacucucuggc.....                                                                                 | 2 | 1 | S04 |
| .....agaaacucucggaagacucucuggc.....                                                                                 | 2 | 0 | S04 |









Star

Mature

|                                                                                                            |      |   |     |
|------------------------------------------------------------------------------------------------------------|------|---|-----|
| uuugcaacccuugaauguuuuugauugacaucaugcauuuuugaucauccucguguugaugaucgauucguuuagaugaccaucacaaaaucuuucaugguuuugc |      |   |     |
| .....uuagaugaccaucaaUaaaau.....                                                                            | 1    | 1 | S03 |
| .....uuagaugGccaucaacaaaau.....                                                                            | 10   | 1 | S03 |
| .....uCagaugaccaucacaaaaau.....                                                                            | 5    | 1 | S03 |
| .....uuagaugaccaucaGcaaaaau.....                                                                           | 6    | 1 | S03 |
| .....Guagaugaccaucacaaaaau.....                                                                            | 8    | 1 | S03 |
| .....uuagaugaccaucGacaaaau.....                                                                            | 4    | 1 | S03 |
| .....uuuAaugaccaucacaaaaau.....                                                                            | 3    | 1 | S03 |
| .....uuagaugaccaucacaaaaCa.....                                                                            | 41   | 1 | S03 |
| .....uuagaugaccaucacaacaGaua.....                                                                          | 8    | 1 | S03 |
| .....uuagaugaUcaucacaaaaau.....                                                                            | 2    | 1 | S03 |
| .....uuagaugacAaucacaaaaau.....                                                                            | 1    | 1 | S03 |
| .....uuagaugaccaucaUcaaaaau.....                                                                           | 1    | 1 | S03 |
| .....uuagaugaccaucacaaaaAa.....                                                                            | 4    | 1 | S03 |
| .....uuagaugaccaCcacaaaaau.....                                                                            | 6    | 1 | S03 |
| .....uuGaugaccaucacaaaaau.....                                                                             | 12   | 1 | S03 |
| .....uuagaugacUaucacaaaaau.....                                                                            | 5    | 1 | S03 |
| .....uuagGugaccaucacaaaaau.....                                                                            | 7    | 1 | S03 |
| .....uGaugaugaccaucacaaaaau.....                                                                           | 4    | 1 | S03 |
| .....uuagaugaccuNaacaaaau.....                                                                             | 1    | 1 | S03 |
| .....Cuagaugaccaucacaaaaau.....                                                                            | 8    | 1 | S03 |
| .....uuagaugaccaucacaaaaU.....                                                                             | 29   | 1 | S03 |
| .....uuagaugaccaucacaaaaGa.....                                                                            | 7    | 1 | S03 |
| .....uuagaugaccGucacaaaaau.....                                                                            | 7    | 1 | S03 |
| .....uuagaugaccaucacaaaaau.....                                                                            | 2643 | 0 | S03 |
| .....uuagaugaccuUaacaaaau.....                                                                             | 2    | 1 | S03 |
| .....uuagaugaccaucacaaaaUG.....                                                                            | 65   | 1 | S03 |
| .....Auagaugaccaucacaaaaau.....                                                                            | 5    | 1 | S03 |
| .....uuagaugaccaAcacaaaaau.....                                                                            | 3    | 1 | S03 |
| .....Nuagaugaccaucacaaaaau.....                                                                            | 10   | 1 | S03 |
| .....uuuUaugaccaucacaaaaau.....                                                                            | 3    | 1 | S03 |
| .....uuagaugUccaucacaaaaau.....                                                                            | 4    | 1 | S03 |
| .....uuagaCgaccaucacaaaaau.....                                                                            | 13   | 1 | S03 |
| .....uuuCaugaccaucacaaaaau.....                                                                            | 1    | 1 | S03 |
| .....uuCaugaccaucacaaaaau.....                                                                             | 1    | 1 | S03 |
| .....uuagaugaccUucacaaaaau.....                                                                            | 1    | 1 | S03 |
| .....uuUaugaccaucacaaaaau.....                                                                             | 1    | 1 | S03 |
| .....uuagaugaccaucacaaaGua.....                                                                            | 10   | 1 | S03 |
| .....uuagauUaccucacaaaaau.....                                                                             | 3    | 1 | S03 |
| .....uuagaugaccaucUacaaaau.....                                                                            | 1    | 1 | S03 |
| .....uuagaugaccaucaacGaaua.....                                                                            | 6    | 1 | S03 |
| .....uuagaugaGcaucacaaaaau.....                                                                            | 1    | 1 | S03 |
| .....uuagaugaccuAaacaaaau.....                                                                             | 1    | 1 | S03 |
| .....uuagauAaccucacaaaaau.....                                                                             | 2    | 1 | S03 |
| .....uuagaugaccGaucacaaaaau.....                                                                           | 1    | 1 | S03 |
| .....uuagaugaccaucacaaaaUc.....                                                                            | 2    | 1 | S03 |
| .....uuagaugaccaucaacGaauac.....                                                                           | 1    | 1 | S03 |
| .....uuagaugaccaucacaaaaU.....                                                                             | 3    | 1 | S03 |
| .....uuagaugaccaucacaaaaUUuu.....                                                                          | 1    | 1 | S03 |
| .....uuagaugaccaucacaaaaUUuu.....                                                                          | 2    | 1 | S03 |
| .....uagaugaccaucacaaaaau.....                                                                             | 1    | 0 | S03 |
| .....agaugaccaucacaaaaau.....                                                                              | 1    | 0 | S03 |
| .....guuuugauugacaucaug.....                                                                               | 1    | 0 | S04 |
| .....uuuuugauugacaucaugA.....                                                                              | 23   | 1 | S04 |
| .....uuuuugauugacaucaugc.....                                                                              | 267  | 0 | S04 |
| .....uuuuugauCgacaucaugc.....                                                                              | 4    | 1 | S04 |
| .....uuuuugauugacaucaugG.....                                                                              | 2    | 1 | S04 |
| .....Cuuuugauugacaucaugc.....                                                                              | 2    | 1 | S04 |
| .....uuugCugauugacaucaugc.....                                                                             | 1    | 1 | S04 |
| .....uuuuugauugacGucuaugc.....                                                                             | 2    | 1 | S04 |
| .....uuGuuugauugacaucaugc.....                                                                             | 1    | 1 | S04 |
| .....uuuuugauugacaucauAc.....                                                                              | 4    | 1 | S04 |
| .....uuugGugauugacaucaugc.....                                                                             | 1    | 1 | S04 |
| .....uuuuugUuuugacaucaugc.....                                                                             | 1    | 1 | S04 |
| .....uCuuuugauugacaucaugc.....                                                                             | 1    | 1 | S04 |
| .....uuuuugaCugacaucaugc.....                                                                              | 1    | 1 | S04 |
| .....uuuuugauugacaucaugc.....                                                                              | 1    | 1 | S04 |
| .....uuuuugauugacaucaugU.....                                                                              | 72   | 1 | S04 |
| .....uuCuuugauugacaucaugc.....                                                                             | 2    | 1 | S04 |
| .....Guuuugauugacaucaugc.....                                                                              | 1    | 1 | S04 |









Provisional ID : chrC08\_2453920  
 Score total : 0.3  
 Score for star read(s) : 3.9  
 Score for read counts : -4.4  
 Score for mfe : 0.9  
 Score for randfold : 0  
 Score for cons. seed :  
 Total read count : 3  
 Mature read count : 2  
 Loop read count : 0  
 Star read count : 1

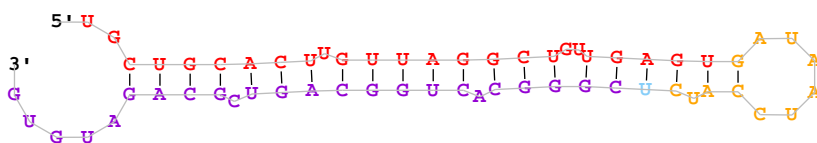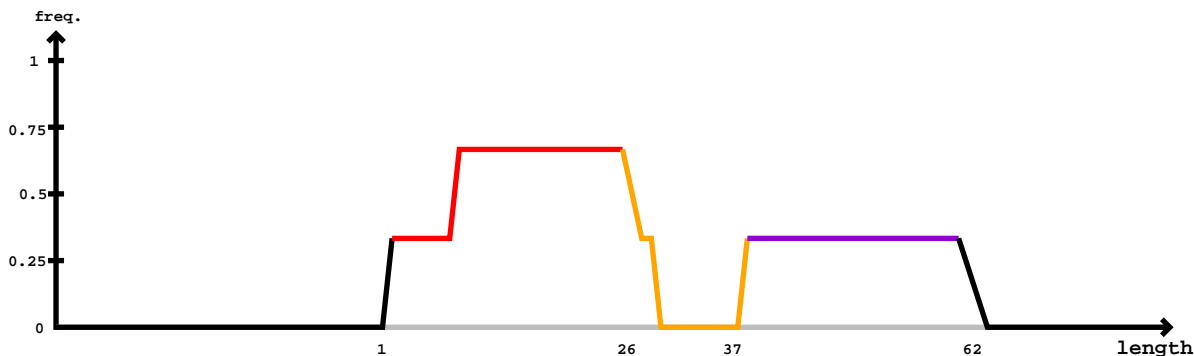

**Mature** **Star**

| 5' | Sequence                                                                                                                    | 3'  | obs | exp | reads | mm | sample |
|----|-----------------------------------------------------------------------------------------------------------------------------|-----|-----|-----|-------|----|--------|
| 5' | uacugguucagagagagagcaacaugcugcuauugcugcacuuguuaggcuguugagugauaauc <u>caucucggggcacuggcagucgcagau</u> guggagauaaugcgguggaugu | -3' | obs |     |       |    |        |
|    | uacugguucagagagagagcaacaugcugcuauugcugcacuuguuaggcuguugagugauaauc <u>caucucggggcacuggcagucgcagau</u> guggagauaaugcgguggaugu |     | exp |     |       |    |        |
|    | ((((((((.....(((.....))))).(((.....(((.....(((.....(((.....(((.....))))))))))))))))))))).....                               |     |     |     | 1     | 0  | S03    |
|    | .....cgggcacuggcagucgcagau.....                                                                                             |     |     |     |       |    |        |
|    | .....ugcugcacuuguuaggcuguugagu.....                                                                                         |     |     |     | 1     | 0  | S04    |
|    | .....cuuguuaggcuguugagugaG.....                                                                                             |     |     |     | 1     | 1  | S04    |





Provisional ID : chrC09\_2487019  
 Score total : 562.3  
 Score for star read(s) : 3.9  
 Score for read counts : 557.4  
 Score for mfe : 1.1  
 Score for randfold : 0  
 Score for cons. seed :  
 Total read count : 1105  
 Mature read count : 1102  
 Loop read count : 2  
 Star read count : 1

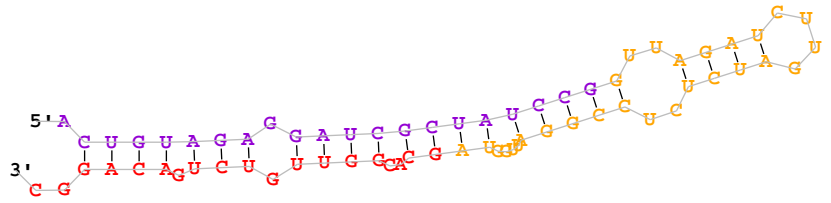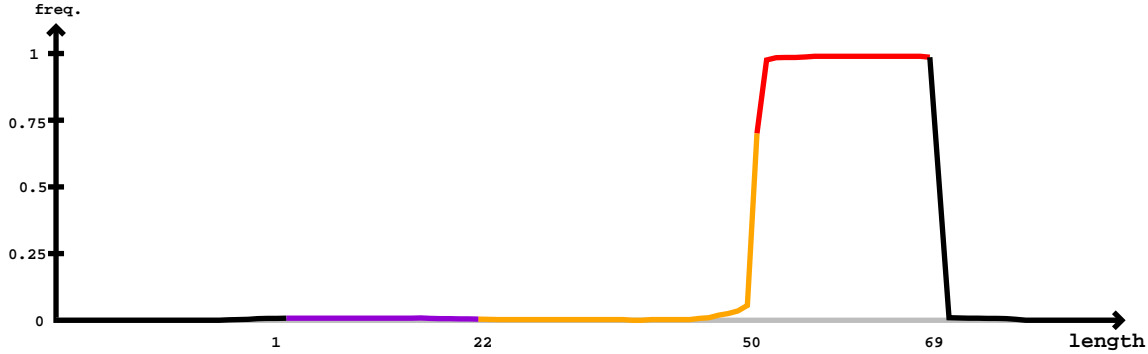

**Star**

**Mature**

```

5' - ugauucuccucggagcuccgcacugagagggaucgcuaucgguuagauucugaucucuccggaugguagcacggguugucugacaggcuuuacuuuuucaguugaa -3'
ugauucuccucggagcuccgcaucugagagggaucgcuaucgguuagauucugaucucuccggaugguagcacggguugucugacaggcuuuacuuuuucaguugaa
(((((.....)))...))(((.....))).....)))))).....)))))).....)))))).....)))))).....)))))).....)))))).....)))))).....))))))
.....cgcacugagagggaucgU.....
.....ucgguuagauucugaucu.....
.....cggauugguagcacggguugucugacagg.....
.....cggauugguagcacggguugucugacaggc.....
.....uugguagcacggguugucugacaggc.....
.....ugguUgcacggguugucugacaggc.....
.....gguagcacggguugucugacaggU.....
.....gguagcacggguugucugacaggA.....
.....gguagcacggguugucugacaggc.....
.....guUgcacggguugucugacaggc.....
.....uagcacggguugucugacaggA.....
.....uagcacggguugAcugacaggc.....
.....uagcacggguugucugacaggc.....
.....Ugcacggguugucugacaggc.....
.....agcacggguugucugacaggc.....
.....Ngcacggguugucugacaggc.....
.....Ugcacggguugucugacaggcu.....
.....gcacggguugucugacaggA.....
.....Ucacggguugucugacaggc.....
.....gcacggguCgucugacaggc.....
.....gcacggguugAcugacaggc.....
.....Ncacggguugucugacaggc.....
.....gcacUguugucugacaggc.....
.....gcacggguugucugacUggc.....
.....gcacggguugucugacaggG.....
.....gcacggguugucugGcaggc.....
.....gcaGgguugucugacaggc.....
.....gcacggguugucugacaUgc.....
.....gcacggguugucugacGggc.....
.....gcacggguugucugacaggc.....
.....gcacAguugucugacaggc.....
.....gcacggguugucugacaggcu.....
.....gcacggCugucugacaggcu.....
  
```

| reads | mm | sample |
|-------|----|--------|
| 1     | 1  | S03    |
| 1     | 0  | S03    |
| 1     | 0  | S03    |
| 1     | 0  | S03    |
| 2     | 0  | S03    |
| 1     | 1  | S03    |
| 2     | 1  | S03    |
| 1     | 1  | S03    |
| 1     | 0  | S03    |
| 1     | 0  | S03    |
| 2     | 1  | S03    |
| 1     | 1  | S03    |
| 1     | 1  | S03    |
| 3     | 0  | S03    |
| 5     | 1  | S03    |
| 5     | 0  | S03    |
| 2     | 1  | S03    |
| 1     | 1  | S03    |
| 16    | 1  | S03    |
| 4     | 1  | S03    |
| 3     | 1  | S03    |
| 1     | 1  | S03    |
| 1     | 1  | S03    |
| 1     | 1  | S03    |
| 2     | 1  | S03    |
| 1     | 1  | S03    |
| 1     | 1  | S03    |
| 2     | 1  | S03    |
| 1     | 1  | S03    |
| 1     | 1  | S03    |
| 1     | 1  | S03    |
| 1     | 1  | S03    |
| 1     | 1  | S03    |
| 1     | 1  | S03    |
| 1     | 1  | S03    |
| 1     | 1  | S03    |
| 153   | 0  | S03    |
| 1     | 1  | S03    |
| 13    | 0  | S03    |
| 1     | 1  | S03    |

Star

Mature

| Sequence                                                                                                   | Count | Count | Category |
|------------------------------------------------------------------------------------------------------------|-------|-------|----------|
| ugauucucccggaggcuccgcacugagaggauccgcuuagcguuagaucuugaucucuccggauugguagcaccggugucugacaggcuuuacuuuuucaguugaa |       |       |          |
| .....gcacggugucugacaggcG.....                                                                              | 1     | 1     | S03      |
| .....gcacggugucugacaggcuuuacuuu.....                                                                       | 1     | 0     | S03      |
| .....gcacggugucugacaggcuuuacuuu.....                                                                       | 1     | 0     | S03      |
| .....cacggugucugacaggUc.....                                                                               | 1     | 1     | S03      |
| .....cacggugucugacaggAc.....                                                                               | 1     | 1     | S03      |
| .....Gacggugucugacaggc.....                                                                                | 1     | 1     | S03      |
| .....cGcggugucugacaggc.....                                                                                | 1     | 1     | S03      |
| .....cCcggugucugacaggc.....                                                                                | 1     | 1     | S03      |
| .....cacggugucugacaggG.....                                                                                | 2     | 1     | S03      |
| .....cacgguguAugacaggc.....                                                                                | 1     | 1     | S03      |
| .....cacgguAgucagaggc.....                                                                                 | 1     | 1     | S03      |
| .....cacggugucugacaggCggc.....                                                                             | 1     | 1     | S03      |
| .....cacggugucugacaggG.....                                                                                | 5     | 1     | S03      |
| .....cacggugucugacaggA.....                                                                                | 9     | 1     | S03      |
| .....cacggugucCgacaggc.....                                                                                | 1     | 1     | S03      |
| .....cacggugucugacaggc.....                                                                                | 105   | 0     | S03      |
| .....cacggugucugacaggcG.....                                                                               | 2     | 1     | S03      |
| .....cacggugucugacaggcu.....                                                                               | 10    | 0     | S03      |
| .....acggugucugacaggcG.....                                                                                | 1     | 1     | S03      |
| .....acggugucugacaggc.....                                                                                 | 2     | 0     | S03      |
| .....acggugucugacaggcu.....                                                                                | 1     | 0     | S03      |
| .....guugucugGcaggcuuuacuuu.....                                                                           | 1     | 1     | S03      |
| .....guugucugacaggcuuAcuuuu.....                                                                           | 1     | 1     | S03      |
| .....uugucugacaggcuuuacuuu.....                                                                            | 1     | 0     | S03      |
| .....uugucugacaggcuuuacuuu.....                                                                            | 1     | 0     | S03      |
| .....cuccgAacugagaggauccg.....                                                                             | 1     | 1     | S04      |
| .....cuccgcacugagaggauccgcuuag.....                                                                        | 1     | 1     | S04      |
| .....uccgcacugagaggauccgcu.....                                                                            | 1     | 0     | S04      |
| .....ccgcacugagaggauccgcu.....                                                                             | 1     | 0     | S04      |
| .....cgAacugagaggauccgcu.....                                                                              | 1     | 1     | S04      |
| .....cgacugGagaggauccgcuuag.....                                                                           | 1     | 1     | S04      |
| .....gcacugagaggauccgcu.....                                                                               | 1     | 0     | S04      |
| .....acugagaggauccgcuuag.....                                                                              | 1     | 1     | S04      |
| .....cuuagaggauccgcuuag.....                                                                               | 1     | 1     | S04      |
| .....uccgguuagauccgcu.....                                                                                 | 1     | 0     | S04      |
| .....ccggauugguagcaccggugucugacaggU.....                                                                   | 1     | 1     | S04      |
| .....uugguagcaccggugucugacaggc.....                                                                        | 2     | 0     | S04      |
| .....uugguGgcaccggugucugacaggc.....                                                                        | 1     | 1     | S04      |
| .....ugguagcaccggugucugacaggc.....                                                                         | 1     | 0     | S04      |
| .....ugUuagcaccggugucugacaggc.....                                                                         | 1     | 1     | S04      |
| .....gguagcaccggugucugacaggc.....                                                                          | 4     | 0     | S04      |
| .....gguUgcaccggugucugacaggc.....                                                                          | 3     | 1     | S04      |
| .....guUgcaccggugucugacaggc.....                                                                           | 1     | 1     | S04      |
| .....guagcaccggugucugacaggc.....                                                                           | 4     | 0     | S04      |
| .....uUgcaccggugucugacaggc.....                                                                            | 1     | 1     | S04      |
| .....uagcaccggugucugacaggU.....                                                                            | 2     | 1     | S04      |
| .....uagcaccggugucugacaggA.....                                                                            | 1     | 1     | S04      |
| .....uagcaccggugucugacaggc.....                                                                            | 2     | 0     | S04      |
| .....agcaccggugucugacaggA.....                                                                             | 1     | 1     | S04      |
| .....agcaccggugucugacaggc.....                                                                             | 5     | 0     | S04      |
| .....agcaccggugucugacaggG.....                                                                             | 1     | 1     | S04      |
| .....agcaccggugucugacaggU.....                                                                             | 1     | 1     | S04      |
| .....Ugcaccggugucugacaggc.....                                                                             | 2     | 1     | S04      |
| .....Ngcaccggugucugacaggc.....                                                                             | 1     | 1     | S04      |
| .....gcaccggugucugacagg.....                                                                               | 3     | 0     | S04      |
| .....Ccaccggugucugacaggc.....                                                                              | 1     | 1     | S04      |
| .....gcaccguuAucugacaggc.....                                                                              | 1     | 1     | S04      |
| .....gcaccggugucugacaggCc.....                                                                             | 1     | 1     | S04      |
| .....gcaccggugucugacaggc.....                                                                              | 346   | 0     | S04      |
| .....gGaccggugucugacaggc.....                                                                              | 1     | 1     | S04      |
| .....gcaccggAugucugacaggc.....                                                                             | 1     | 1     | S04      |
| .....gcGcggugucugacaggc.....                                                                               | 1     | 1     | S04      |
| .....gcaccggugucugacaggG.....                                                                              | 1     | 1     | S04      |
| .....gcaccgguugCugacaggc.....                                                                              | 3     | 1     | S04      |
| .....gcaccgguCgucagaggc.....                                                                               | 1     | 1     | S04      |
| .....gcaccAaugucugacaggc.....                                                                              | 1     | 1     | S04      |
| .....Acaccggugucugacaggc.....                                                                              | 1     | 1     | S04      |
| .....gcaccggGugucugacaggc.....                                                                             | 2     | 1     | S04      |
| .....Ucaccggugucugacaggc.....                                                                              | 5     | 1     | S04      |

Star

Mature

|                                                                                                             |     |   |     |
|-------------------------------------------------------------------------------------------------------------|-----|---|-----|
| ugauucucucggaggcuccgcacucugagggaucgcuauccgguuagaucuugaucucucggauugguagcacgguuugucugacaggcuuuacuuuuucaguugaa |     |   |     |
| .....gcacgguuugucugacagAc.....                                                                              | 1   | 1 | S04 |
| .....gcacUguugucugacaggc.....                                                                               | 1   | 1 | S04 |
| .....gcacgguuAgucugacaggc.....                                                                              | 2   | 1 | S04 |
| .....gcacgguuugucCgacaggc.....                                                                              | 1   | 1 | S04 |
| .....gcacgguuugucugacaggG.....                                                                              | 3   | 1 | S04 |
| .....gcacgguuugucugacaggA.....                                                                              | 32  | 1 | S04 |
| .....gcacgguuugucugGcaggc.....                                                                              | 2   | 1 | S04 |
| .....gcacgguuugucugacaggcu.....                                                                             | 108 | 0 | S04 |
| .....gcacgguuCgucugacaggcu.....                                                                             | 1   | 1 | S04 |
| .....gcacgguuuguUugacaggcu.....                                                                             | 1   | 1 | S04 |
| .....gcacgguuugucCgacaggcu.....                                                                             | 4   | 1 | S04 |
| .....Ucagguuugucugacaggcu.....                                                                              | 1   | 1 | S04 |
| .....gcacgguuugucugacaggcG.....                                                                             | 9   | 1 | S04 |
| .....gcGcgguuugucugacaggcu.....                                                                             | 1   | 1 | S04 |
| .....gcacgguuugucugacaggcuuG.....                                                                           | 1   | 1 | S04 |
| .....gcacgguuugucugacaggcuCuac.....                                                                         | 1   | 1 | S04 |
| .....cacgguuUucugacaggc.....                                                                                | 1   | 1 | S04 |
| .....cacgguuugucugacaggG.....                                                                               | 2   | 1 | S04 |
| .....cacgguuugucugacaggc.....                                                                               | 122 | 0 | S04 |
| .....cacgguuugucugacagAc.....                                                                               | 2   | 1 | S04 |
| .....Nacgguuugucugacaggc.....                                                                               | 1   | 1 | S04 |
| .....cCgguuugucugacaggc.....                                                                                | 5   | 1 | S04 |
| .....cacgguuugucugacaggA.....                                                                               | 13  | 1 | S04 |
| .....cacgguuugucugCcaggc.....                                                                               | 1   | 1 | S04 |
| .....cacgguuugucugacaggcG.....                                                                              | 5   | 1 | S04 |
| .....cacgguuugucugacaggcu.....                                                                              | 19  | 0 | S04 |
| .....cacgguuugucugaGaggcu.....                                                                              | 1   | 1 | S04 |
| .....cacCguugucugacaggcu.....                                                                               | 1   | 1 | S04 |
| .....cacgguuugucugUcaggcu.....                                                                              | 1   | 1 | S04 |
| .....acgguuugucugacaggcG.....                                                                               | 2   | 1 | S04 |
| .....acgguuugucugacaggcu.....                                                                               | 4   | 0 | S04 |
| .....cgguuugucugacaggcuuuacuu.....                                                                          | 1   | 0 | S04 |
| .....uugucugacaggcuuuacuuuu.....                                                                            | 1   | 0 | S04 |





**Mature**

**Star**

aaaaaaaaaguuaaagcauauucagcaugggucagggcguaaccuuugaacauggaucucaaggacggcuggauuugugcagucagacguguuuuucauguggguga  
.....cagucagacguguauuCucaug..... 1 1 S04  
.....agacguguauuCucauguggggu... 1 1 S04



Provisional ID : chrC09\_2513625  
 Score total : 1.6  
 Score for star read(s) : -1.3  
 Score for read counts : 0  
 Score for mfe : 2.9  
 Score for randfold : 0  
 Score for cons. seed :  
 Total read count : 20  
 Mature read count : 20  
 Loop read count : 0  
 Star read count : 0

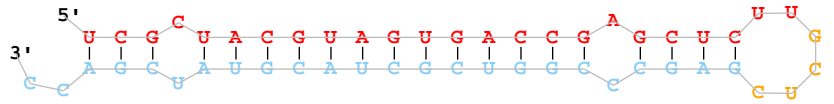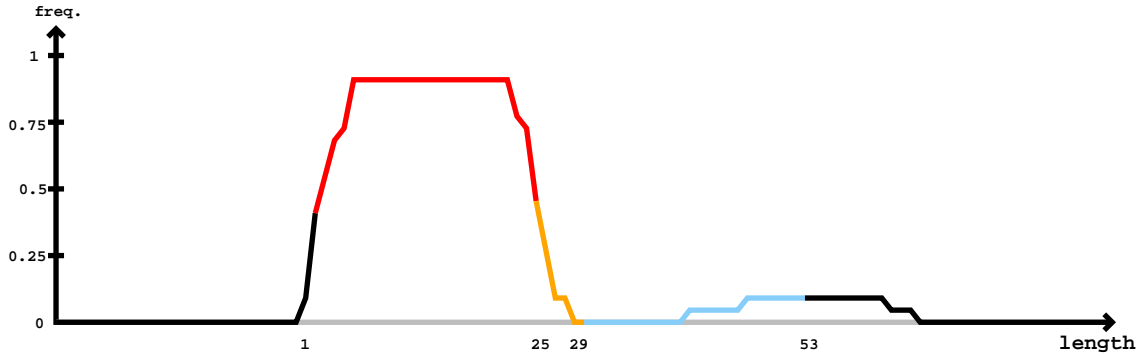

**Mature** **Star**

| 5' -                                                                                                                           | reads | exp | mm | sample |
|--------------------------------------------------------------------------------------------------------------------------------|-------|-----|----|--------|
| acguagugacugagcgagcgcucggu <u>ucgcuacguagugaccgagcucuu</u> <u>ugcucgagccggucgcuacguaucgac</u> cgagcuuuggcucgaacuuggucgcuacguag |       |     |    |        |
| .....gucgcuacguagugaccgagcucC.....                                                                                             | 1     | 1   | 1  | S03    |
| .....ucgcuacguagugaccgagcuc.....                                                                                               | 2     | 0   | 0  | S03    |
| .....ucgcuacguagugaccgagcucuu.....                                                                                             | 4     | 0   | 0  | S03    |
| .....cgcuacguagugaccgagcuc.....                                                                                                | 1     | 0   | 0  | S03    |
| .....cgcuacguagugaccgagcucuu.....                                                                                              | 1     | 0   | 0  | S03    |
| .....cgcuacguagugaccgagcucA.....                                                                                               | 1     | 1   | 1  | S03    |
| .....gcuacguagugaccgagcucuu.....                                                                                               | 2     | 0   | 0  | S03    |
| .....gcuacguagugaccgagcucuuCg.....                                                                                             | 1     | 1   | 1  | S03    |
| .....cuacguagugaccgagcuc.....                                                                                                  | 1     | 0   | 0  | S03    |
| .....uacguagugacUgagcucuu.....                                                                                                 | 1     | 1   | 1  | S03    |
| .....uacguagugaccgagcucuuA.....                                                                                                | 1     | 1   | 1  | S03    |
| .....uacguagugaccgagcucuuCcu.....                                                                                              | 2     | 1   | 1  | S03    |
| .....gucgcuacguagugaccgagcucuu.....                                                                                            | 1     | 0   | 0  | S04    |
| .....ucgcuacguagugaccgagcucA.....                                                                                              | 1     | 1   | 1  | S04    |
| .....cuacguaCcgaccgagcucuuug.....                                                                                              | 1     | 1   | 1  | S04    |
| .....aucgaccgagcucuuuggcu.....                                                                                                 | 1     | 0   | 0  | S04    |

Provisional ID : chrC09\_2516963  
 Score total : 0.7  
 Score for star read(s) : -1.3  
 Score for read counts : 0  
 Score for mfe : 2  
 Score for randfold : 0  
 Score for cons. seed :  
 Total read count : 419  
 Mature read count : 419  
 Loop read count : 0  
 Star read count : 0

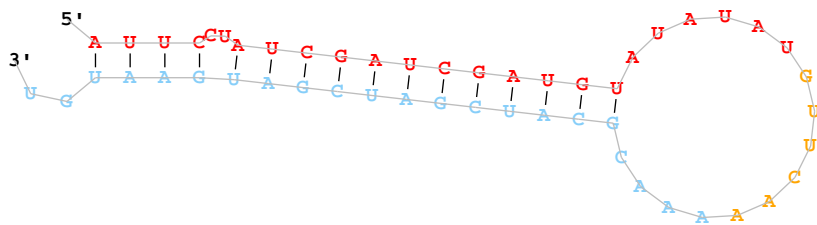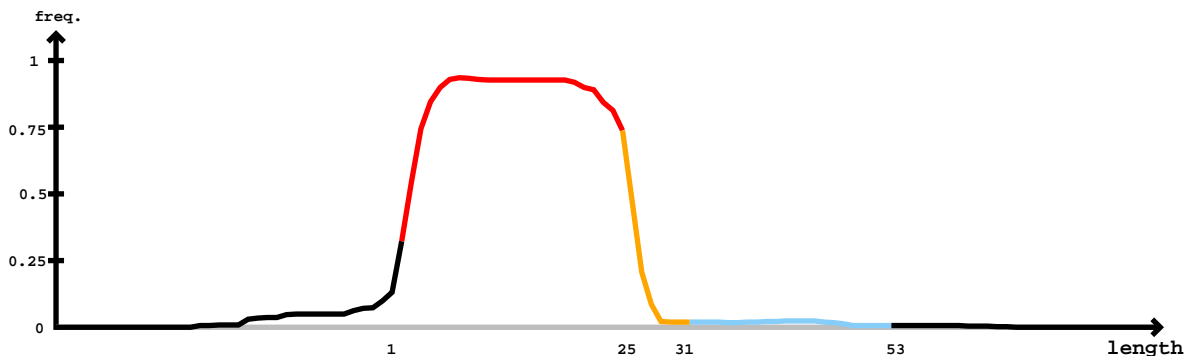

**Mature** **Star**

| 5'                                                                                                                | reads | mm | sample |
|-------------------------------------------------------------------------------------------------------------------|-------|----|--------|
| cucggaauauuccgaggaauauguccgucgguauauuuccuaucgaucgauguaauauauguucaaaaacgcaucgaucgaugaauuccgaggaauauuccgacgaaguucuc |       |    |        |
| .....gaggaauauguccgucgguaua.....                                                                                  | 1     | 0  | S03    |
| .....gaggaauauguccgucgguauuu.....                                                                                 | 1     | 0  | S03    |
| .....auauguccgucgguauauucc.....                                                                                   | 2     | 0  | S03    |
| .....auauguccgucgguauauuccua.....                                                                                 | 1     | 0  | S03    |
| .....auauguccgucgguauauuccuau.....                                                                                | 1     | 0  | S03    |
| .....uauauguccgucgguauauuccu.....                                                                                 | 1     | 0  | S03    |
| .....gguaauauucUuaucgaucgaugua.....                                                                               | 2     | 1  | S03    |
| .....guaauauucUuaucgaucgaugu.....                                                                                 | 2     | 1  | S03    |
| .....guaauauucUuaucgaucgaugua.....                                                                                | 2     | 1  | S03    |
| .....uaauauucUuaucgaucgauguaa.....                                                                                | 1     | 1  | S03    |
| .....auauucUuaucgaucgaugua.....                                                                                   | 1     | 1  | S03    |
| .....auauucUuaucgaucgauguaa.....                                                                                  | 3     | 1  | S03    |
| .....auauucUuaucgaucgauguaau.....                                                                                 | 1     | 1  | S03    |
| .....uaucUuaucgaucgaugua.....                                                                                     | 1     | 1  | S03    |
| .....uaucUuaucgaucgauguaa.....                                                                                    | 5     | 1  | S03    |
| .....uaucUuaucgaucgauguaaua.....                                                                                  | 1     | 1  | S03    |
| .....auucUuaucgaucgauguaa.....                                                                                    | 1     | 1  | S03    |
| .....auucUuaucgaucgauguaau.....                                                                                   | 3     | 1  | S03    |
| .....auucUuaucgaucgauguaaua.....                                                                                  | 3     | 1  | S03    |
| .....auucUuaucgaucgauguaauau.....                                                                                 | 30    | 1  | S03    |
| .....auucUuaucgaucgauguaauaug.....                                                                                | 1     | 1  | S03    |
| .....uucUuaucgaucgauguaau.....                                                                                    | 2     | 1  | S03    |
| .....uucUuaucgaucgauguaaua.....                                                                                   | 8     | 1  | S03    |
| .....uucUuaucgaucgauguaauau.....                                                                                  | 7     | 1  | S03    |
| .....uucUuaucgaucgauguaauaug.....                                                                                 | 33    | 1  | S03    |
| .....uucUuaucgaucgauguaauauaugu.....                                                                              | 1     | 1  | S03    |
| .....ucUuaucgaucgauguaaua.....                                                                                    | 1     | 1  | S03    |
| .....uccuauucgaucgauguaauuU.....                                                                                  | 1     | 1  | S03    |
| .....ucUuaucgaucgauguaauau.....                                                                                   | 6     | 1  | S03    |
| .....uccuauucgaucgauguaauuAC.....                                                                                 | 1     | 1  | S03    |
| .....uccuauucgaucgauguaauuCu.....                                                                                 | 1     | 1  | S03    |
| .....uccuauucgaucgauguaauuau.....                                                                                 | 1     | 1  | S03    |
| .....ucUuaucgaucgauguaauuauaug.....                                                                               | 8     | 1  | S03    |
| .....uccuauucgaucgauguaauuauA.....                                                                                | 1     | 1  | S03    |

Mature

Star

|                                                                                                                             |    |   |     |
|-----------------------------------------------------------------------------------------------------------------------------|----|---|-----|
| cucggaaauuccgaggaauguccgucggua <u>uauuccuaucgaucgaugua</u> uauaugucaa <u>aaacgcaucgaucgauga</u> auguccgaggaaauuccgacgaaguuc |    |   |     |
| .....uccuaucgaucgaugua <u>uauaug</u> .....                                                                                  | 7  | 0 | S03 |
| .....uccuaucgaucgaugua <u>uauaugu</u> .....                                                                                 | 3  | 0 | S03 |
| .....uc <u>U</u> uauucgaucgaugua <u>uauaugu</u> .....                                                                       | 8  | 1 | S03 |
| ..... <u>N</u> ccuaucgaucgaugua <u>uauaugu</u> .....                                                                        | 1  | 1 | S03 |
| .....c <u>U</u> uauucgaucgaugua <u>uaua</u> .....                                                                           | 2  | 1 | S03 |
| .....ccuaucgaucgaugua <u>uauau</u> .....                                                                                    | 1  | 0 | S03 |
| .....c <u>U</u> uauucgaucgaugua <u>uauau</u> .....                                                                          | 3  | 1 | S03 |
| .....ccuaucgaucgaugua <u>U</u> uauaug.....                                                                                  | 1  | 1 | S03 |
| .....ccuaucgaucgaugua <u>uauauC</u> .....                                                                                   | 1  | 1 | S03 |
| .....c <u>U</u> uauucgaucgaugua <u>uauaug</u> .....                                                                         | 8  | 1 | S03 |
| .....ccuaucgaucgaugua <u>uauaug</u> .....                                                                                   | 2  | 0 | S03 |
| .....c <u>U</u> uauucgaucgaugua <u>uauaugu</u> .....                                                                        | 2  | 1 | S03 |
| .....ccuaucgaucgaugua <u>uauauguu</u> .....                                                                                 | 1  | 0 | S03 |
| .....cuauucgaucgaugua <u>uauU</u> .....                                                                                     | 1  | 1 | S03 |
| .....cuauucgaucgaugua <u>uauaug</u> .....                                                                                   | 1  | 0 | S03 |
| ..... <u>U</u> uauucgaucgaugua <u>uauaug</u> .....                                                                          | 1  | 1 | S03 |
| .....cuauucgaucgaugua <u>uauauC</u> .....                                                                                   | 1  | 1 | S03 |
| .....cuauucgaucgaugua <u>uauaugu</u> .....                                                                                  | 3  | 0 | S03 |
| .....cuauucgaucgaugua <u>uauauguu</u> .....                                                                                 | 1  | 0 | S03 |
| .....uauucgaucgaugua <u>uaua</u> .....                                                                                      | 1  | 0 | S03 |
| .....uauucgaucgaugua <u>uauaug</u> .....                                                                                    | 1  | 0 | S03 |
| .....uauucgaucgaugua <u>uauaugu</u> .....                                                                                   | 1  | 0 | S03 |
| .....uauucgaucgaugua <u>uauaugCu</u> .....                                                                                  | 1  | 1 | S03 |
| .....uauucgaucgaugua <u>uauauguu</u> .....                                                                                  | 2  | 0 | S03 |
| .....uauucgaucgaugua <u>uauauguA</u> .....                                                                                  | 1  | 1 | S03 |
| .....uauucgaucgaugua <u>uauauguG</u> .....                                                                                  | 1  | 1 | S03 |
| .....uauucgaucgaugua <u>U</u> uauaugu.....                                                                                  | 2  | 1 | S03 |
| .....uauuguucaaaaacgcaucgaucg.....                                                                                          | 1  | 0 | S03 |
| .....caaaaacgcaucgaucg <u>U</u> .....                                                                                       | 1  | 1 | S03 |
| .....caaaaacgcaucgaucg <u>au</u> .....                                                                                      | 1  | 0 | S03 |
| .....aucgaucgauga <u>auguccgagga</u> .....                                                                                  | 1  | 0 | S03 |
| .....gaggaa <u>auguccgucggua</u> .....                                                                                      | 1  | 0 | S04 |
| .....gga <u>auguccgucggua</u> u.....                                                                                        | 1  | 0 | S04 |
| .....auauguccgucggua <u>uauC</u> .....                                                                                      | 1  | 1 | S04 |
| .....auauguccgucggua <u>uauucc</u> .....                                                                                    | 4  | 0 | S04 |
| .....auauguccgucggua <u>uauuccA</u> .....                                                                                   | 1  | 1 | S04 |
| .....uauuguccgucggua <u>uauucc</u> .....                                                                                    | 1  | 0 | S04 |
| .....auguccgucggua <u>uauucc</u> .....                                                                                      | 1  | 0 | S04 |
| .....guccgucgg <u>A</u> uauuccu.....                                                                                        | 1  | 1 | S04 |
| .....guccgucggua <u>uauuA</u> ccu.....                                                                                      | 1  | 1 | S04 |
| .....guccgucggua <u>uauuccu</u> au.....                                                                                     | 2  | 0 | S04 |
| .....guccgucggua <u>uauuccu</u> aucg.....                                                                                   | 1  | 0 | S04 |
| .....uccgucggua <u>uauuccA</u> uc.....                                                                                      | 1  | 1 | S04 |
| .....ggua <u>uauuccU</u> uauucgaucgaug.....                                                                                 | 2  | 1 | S04 |
| .....ggua <u>uauuccU</u> uauucgaucgaugua.....                                                                               | 2  | 1 | S04 |
| .....auauucc <u>U</u> uauucgaucgaugua.....                                                                                  | 2  | 1 | S04 |
| .....auauucc <u>U</u> uauucgaucgauguaa.....                                                                                 | 5  | 1 | S04 |
| .....uauucc <u>U</u> uauucgaucgaugua.....                                                                                   | 2  | 1 | S04 |
| .....uauucc <u>U</u> uauucgaucgauguaa.....                                                                                  | 6  | 1 | S04 |
| .....uauucc <u>U</u> uauucgaucgauguaa.....                                                                                  | 1  | 1 | S04 |
| .....auucc <u>U</u> uauucgaucgaugua.....                                                                                    | 1  | 1 | S04 |
| .....auucc <u>U</u> uauucgaucgaugua.....                                                                                    | 1  | 1 | S04 |
| .....auucc <u>U</u> uauucgaucgauguaa.....                                                                                   | 2  | 1 | S04 |
| .....auucc <u>U</u> uauucgaucgauguaa.....                                                                                   | 8  | 1 | S04 |
| .....auucc <u>U</u> uauucgaucgauguaa.....                                                                                   | 40 | 1 | S04 |
| .....uucc <u>U</u> uauucgaucgauguaa.....                                                                                    | 2  | 1 | S04 |
| .....uucc <u>U</u> uauucgaucgauguaa.....                                                                                    | 8  | 1 | S04 |
| .....uucc <u>U</u> uauucgaucgauguaa.....                                                                                    | 5  | 1 | S04 |
| .....uucc <u>U</u> uauucgaucgauguaa.....                                                                                    | 37 | 1 | S04 |
| .....uccuaucgaucgaugua <u>uau</u> .....                                                                                     | 1  | 0 | S04 |
| .....uc <u>U</u> uauucgaucgaugua <u>uau</u> .....                                                                           | 3  | 1 | S04 |
| .....uc <u>U</u> uauucgaucgaugua <u>uaua</u> .....                                                                          | 1  | 1 | S04 |
| .....uc <u>U</u> uauucgaucgaugua <u>uauau</u> .....                                                                         | 11 | 1 | S04 |
| .....uccuaucgaucgaugua <u>uauau</u> .....                                                                                   | 2  | 0 | S04 |
| .....uccuaucgaucgaugua <u>uauauC</u> .....                                                                                  | 1  | 1 | S04 |
| .....uccuaucgaucgaugua <u>uauaug</u> .....                                                                                  | 3  | 0 | S04 |
| .....uc <u>U</u> uauucgaucgaugua <u>uauaug</u> .....                                                                        | 5  | 1 | S04 |
| .....uccuaucgaucgaugua <u>uauauA</u> .....                                                                                  | 3  | 1 | S04 |
| .....uccuaucgaucgaugua <u>uauauCg</u> .....                                                                                 | 1  | 1 | S04 |

Mature

Star

|                                                                                                                                                 |    |   |     |
|-------------------------------------------------------------------------------------------------------------------------------------------------|----|---|-----|
| cucggaaauuuccgaggaauguccgucggua <u>uuuccu</u> aucgaucgaugua <u>uuau</u> aug <u>uuca</u> aaacgcaucgaucgauga <u>augu</u> ccgaggaaauuuccgacgaaguuc |    |   |     |
| .....uccu                                                                                                                                       | 1  | 1 | S04 |
| .....ucU                                                                                                                                        | 12 | 1 | S04 |
| .....uccu                                                                                                                                       | 1  | 1 | S04 |
| .....uccu                                                                                                                                       | 11 | 0 | S04 |
| .....cU                                                                                                                                         | 1  | 1 | S04 |
| .....ccu                                                                                                                                        | 1  | 0 | S04 |
| .....cU                                                                                                                                         | 6  | 1 | S04 |
| .....ccu                                                                                                                                        | 2  | 0 | S04 |
| .....cU                                                                                                                                         | 9  | 1 | S04 |
| .....ccu                                                                                                                                        | 1  | 1 | S04 |
| .....ccu                                                                                                                                        | 2  | 0 | S04 |
| .....cU                                                                                                                                         | 1  | 1 | S04 |
| .....ccu                                                                                                                                        | 3  | 1 | S04 |
| .....ccu                                                                                                                                        | 1  | 0 | S04 |
| .....cu                                                                                                                                         | 2  | 0 | S04 |
| .....U                                                                                                                                          | 5  | 1 | S04 |
| .....U                                                                                                                                          | 1  | 1 | S04 |
| .....Gu                                                                                                                                         | 1  | 1 | S04 |
| .....cu                                                                                                                                         | 3  | 0 | S04 |
| .....cu                                                                                                                                         | 1  | 1 | S04 |
| .....cu                                                                                                                                         | 4  | 0 | S04 |
| .....u                                                                                                                                          | 1  | 0 | S04 |
| .....u                                                                                                                                          | 2  | 0 | S04 |
| .....u                                                                                                                                          | 1  | 1 | S04 |
| .....u                                                                                                                                          | 1  | 1 | S04 |
| .....u                                                                                                                                          | 5  | 0 | S04 |
| .....u                                                                                                                                          | 1  | 1 | S04 |
| .....u                                                                                                                                          | 2  | 1 | S04 |
| .....u                                                                                                                                          | 1  | 1 | S04 |
| .....a                                                                                                                                          | 1  | 1 | S04 |
| .....a                                                                                                                                          | 2  | 1 | S04 |
| .....a                                                                                                                                          | 1  | 1 | S04 |
| .....c                                                                                                                                          | 1  | 0 | S04 |
| .....a                                                                                                                                          | 1  | 1 | S04 |
| .....a                                                                                                                                          | 1  | 0 | S04 |
| .....g                                                                                                                                          | 1  | 1 | S04 |
| .....g                                                                                                                                          | 1  | 1 | S04 |
| .....g                                                                                                                                          | 1  | 1 | S04 |
| .....u                                                                                                                                          | 1  | 1 | S04 |
| .....c                                                                                                                                          | 1  | 1 | S04 |
| .....a                                                                                                                                          | 1  | 1 | S04 |
| .....a                                                                                                                                          | 1  | 1 | S04 |
| .....g                                                                                                                                          | 1  | 1 | S04 |
| .....a                                                                                                                                          | 1  | 1 | S04 |

Provisional ID : chrC09\_2521898  
 Score total : 581  
 Score for star read(s) : 3.9  
 Score for read counts : 577.2  
 Score for mfe : -0.1  
 Score for randfold : 0  
 Score for cons. seed :  
 Total read count : 1144  
 Mature read count : 1143  
 Loop read count : 0  
 Star read count : 1

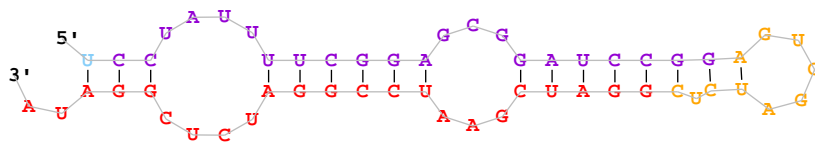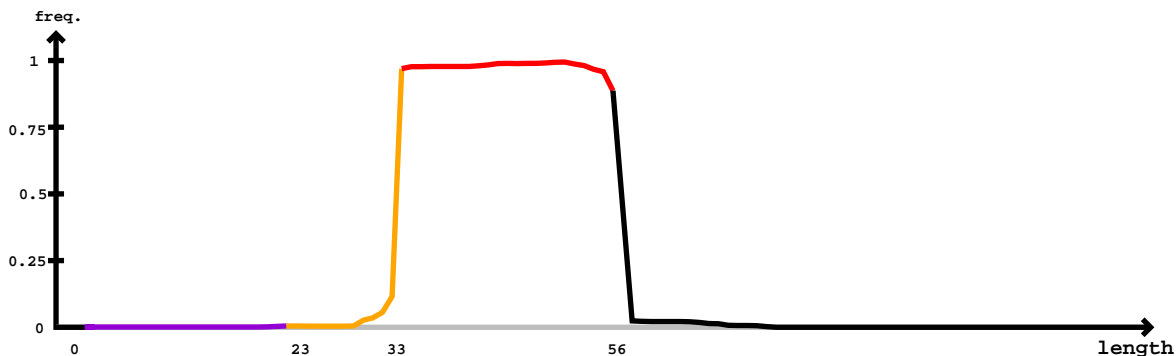

**Star** **Mature**

| 5' -                                                 | Star                         | Mature                                                | -3' | obs | mm | sample |
|------------------------------------------------------|------------------------------|-------------------------------------------------------|-----|-----|----|--------|
| auccuauuuucggagcggauccggaguggaucucggauccggaucucggaua | aguggaucucggauccggaucucggaua | aaagucucaggccuaucaucaaauacauuagacuguaacaaaaaaaaucaaga |     |     |    |        |
| auccuauuuucggagcggauccggaguggaucucggauccggaucucggaua | aguggaucucggauccggaucucggaua | aaagucucaggccuaucaucaaauacauuagacuguaacaaaaaaaaucaaga |     |     |    |        |
| (((.....(((.....(((.....))).....))).....))).....     | .....                        | .....                                                 |     |     |    |        |
| .....cuaauuuucggagcggauccgg.....                     | .....                        | .....                                                 |     |     |    |        |
| .....aucucggauccggaucggaucucg.....                   | .....                        | .....                                                 |     | 1   | 1  | S03    |
| .....ucucggauccggaucggaucuc.....                     | .....                        | .....                                                 |     | 1   | 1  | S03    |
| .....ucucggauccggaucggaucuc.....                     | .....                        | .....                                                 |     | 2   | 0  | S03    |
| .....ucucggauccggaucggaucucg.....                    | .....                        | .....                                                 |     | 3   | 0  | S03    |
| .....ucucggauccggaucggaucucgC.....                   | .....                        | .....                                                 |     | 1   | 1  | S03    |
| .....ucucggauccggaucggaucucgg.....                   | .....                        | .....                                                 |     | 4   | 0  | S03    |
| .....cucggauccggaucggauc.....                        | .....                        | .....                                                 |     | 1   | 0  | S03    |
| .....cucggauccggaucggauc.....                        | .....                        | .....                                                 |     | 1   | 0  | S03    |
| .....cucggauccggaucggaucucg.....                     | .....                        | .....                                                 |     | 1   | 0  | S03    |
| .....cucggauccggaucggaucucgga.....                   | .....                        | .....                                                 |     | 3   | 0  | S03    |
| .....cucggauccggaucggaucucgga.....                   | .....                        | .....                                                 |     | 1   | 0  | S03    |
| .....ucggauccggaucggaucggaA.....                     | .....                        | .....                                                 |     | 1   | 1  | S03    |
| .....ucggauccggaucggaucggauc.....                    | .....                        | .....                                                 |     | 1   | 0  | S03    |
| .....ucggauccggaucggaucggauc.....                    | .....                        | .....                                                 |     | 8   | 1  | S03    |
| .....ucggauccggaucggaucggauc.....                    | .....                        | .....                                                 |     | 4   | 0  | S03    |
| .....cggauccggaucggaucgga.....                       | .....                        | .....                                                 |     | 1   | 0  | S03    |
| .....cggauccggaucggaucgga.....                       | .....                        | .....                                                 |     | 1   | 0  | S03    |
| .....cggauccggaucggaucgga.....                       | .....                        | .....                                                 |     | 11  | 0  | S03    |
| .....cggauccggaucggaucggaucG.....                    | .....                        | .....                                                 |     | 2   | 1  | S03    |
| .....cggauccggaucggaucggauc.....                     | .....                        | .....                                                 |     | 1   | 1  | S03    |
| .....cggauccggaucggaucggauc.....                     | .....                        | .....                                                 |     | 21  | 0  | S03    |
| .....ggauccggaucggaucggauc.....                      | .....                        | .....                                                 |     | 23  | 0  | S03    |
| .....ggauccggaucggaucggauc.....                      | .....                        | .....                                                 |     | 1   | 1  | S03    |
| .....ggaCcgauccggaucggauc.....                       | .....                        | .....                                                 |     | 1   | 1  | S03    |
| .....ggauccggaucggaucggaucG.....                     | .....                        | .....                                                 |     | 3   | 1  | S03    |
| .....ggauccggaucggaucggauc.....                      | .....                        | .....                                                 |     | 324 | 0  | S03    |
| .....ggGucggaucggaucggauc.....                       | .....                        | .....                                                 |     | 2   | 1  | S03    |
| .....ggauccggaucggaucggaucCua.....                   | .....                        | .....                                                 |     | 1   | 1  | S03    |
| .....Ngauccggaucggaucggauc.....                      | .....                        | .....                                                 |     | 2   | 1  | S03    |
| .....ggauccggaucggaucggauc.....                      | .....                        | .....                                                 |     | 3   | 1  | S03    |
| .....ggauccggaucggaucggaucG.....                     | .....                        | .....                                                 |     | 119 | 1  | S03    |
| .....ggauccggaucggaucggauc.....                      | .....                        | .....                                                 |     | 1   | 1  | S03    |
| .....ggauccggaucggaucggaucUa.....                    | .....                        | .....                                                 |     | 1   | 1  | S03    |













Provisional ID : chrC09\_2547825  
 Score total : 3.8  
 Score for star read(s) : 3.9  
 Score for read counts : -0.3  
 Score for mfe : 0.2  
 Score for randfold : 0  
 Score for cons. seed :  
 Total read count : 11  
 Mature read count : 10  
 Loop read count : 0  
 Star read count : 1

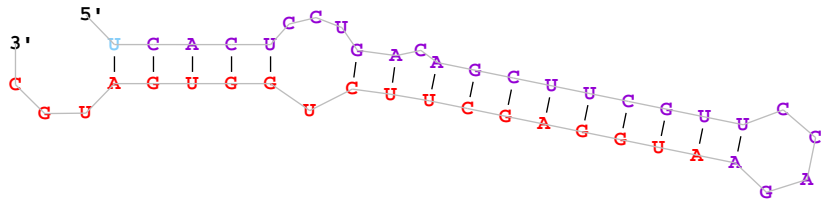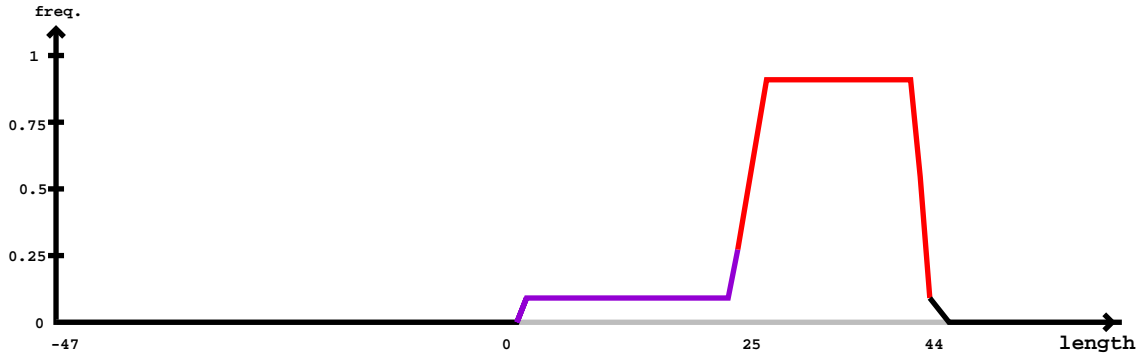

Star                      Mature

|                                                                                                                                                                                                                                                                                                                                                                                                                                                                                                                                                                                                        |                                                                                                                                                                                                              |
|--------------------------------------------------------------------------------------------------------------------------------------------------------------------------------------------------------------------------------------------------------------------------------------------------------------------------------------------------------------------------------------------------------------------------------------------------------------------------------------------------------------------------------------------------------------------------------------------------------|--------------------------------------------------------------------------------------------------------------------------------------------------------------------------------------------------------------|
| 5' - uaaaucgguuaguuuaaaguuaauuuuugcaugaucgaaucuuuu <u>cacuuccugacagcuuccagaga</u> <span style="color: red;">auggagcuucuggugaug</span> ccauggcuucugccaaaau<br>uaaaucgguuaguuuaaaguuaauuuuugcaugaucgaaucuuuu <u>caacuuccugacagcuuccagaga</u> <span style="color: red;">auggagcuucuggugaug</span> ccauggcuucugccaaaau<br>.....(((.....(((.....)))))).....(((.....(((.....)))))).....(((.....)))<br>.....auggagcuucuggugaCg.....<br>.....auggagcuucuggugaCg.....<br><br>.....cacuuccugacagcuuccagaga.....<br>.....Caauggagcuucuggugau.....<br>.....auggagcuucuggugau.....<br>.....auggagcuucuggugaCgc..... | -3'    obs<br>exp<br><br>reads    mm        sample<br>4        1        S03<br>1        1        S03<br><br>1        0        S04<br>2        1        S04<br>2        0        S04<br>1        1        S04 |
|--------------------------------------------------------------------------------------------------------------------------------------------------------------------------------------------------------------------------------------------------------------------------------------------------------------------------------------------------------------------------------------------------------------------------------------------------------------------------------------------------------------------------------------------------------------------------------------------------------|--------------------------------------------------------------------------------------------------------------------------------------------------------------------------------------------------------------|

Provisional ID : chrC09\_2556472  
 Score total : 0.6  
 Score for star read(s) : -1.3  
 Score for read counts : 0  
 Score for mfe : 1.9  
 Score for randfold : 0  
 Score for cons. seed :  
 Total read count : 592  
 Mature read count : 592  
 Loop read count : 0  
 Star read count : 0

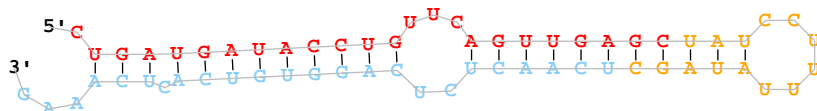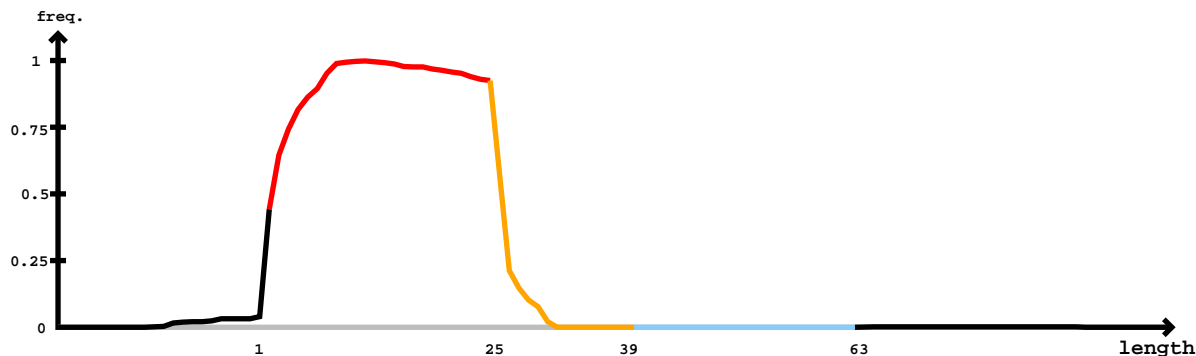

**Mature**

**Star**

| 5'                                                                                                                          | reads | mm | sample |
|-----------------------------------------------------------------------------------------------------------------------------|-------|----|--------|
| ucgcccguuuagccggggca <u>cugaugauaccguuucaguugagcuauccuuuuauagcucaacucucaggugucacucaaaag</u> ccuucuuuugagcucugcucuaucuuaguca | 1     | 1  | S03    |
| uuagccggggAacugaugauacc                                                                                                     | 1     | 1  | S03    |
| uagccggggAacugaugauaccug                                                                                                    | 1     | 1  | S03    |
| agccggggAacugaugauaccu                                                                                                      | 1     | 1  | S03    |
| agccggggAacugaugauaccugu                                                                                                    | 2     | 1  | S03    |
| cggggAacugaugauacc                                                                                                          | 1     | 1  | S03    |
| ggggcacugaugauaccug                                                                                                         | 1     | 0  | S03    |
| ggggcacugaugauaccuguuca                                                                                                     | 1     | 1  | S03    |
| ggggcacugaugauaccuguuca                                                                                                     | 1     | 0  | S03    |
| acugaugauaccuguuca                                                                                                          | 1     | 0  | S03    |
| acugaugauaccuguucU                                                                                                          | 1     | 1  | S03    |
| acugaugauaccuguucaguug                                                                                                      | 1     | 0  | S03    |
| acugaugauaccuguucaguugag                                                                                                    | 1     | 0  | S03    |
| cugaugauaccuguucaU                                                                                                          | 1     | 1  | S03    |
| cugaugauaccuguucaguug                                                                                                       | 2     | 0  | S03    |
| cugaugauaccuguucaguugagc                                                                                                    | 65    | 0  | S03    |
| cuUaugauaccuguucaguugagc                                                                                                    | 1     | 1  | S03    |
| cugaugauaccuguucagCugagc                                                                                                    | 1     | 1  | S03    |
| cugaugauaUcuguucaguugagc                                                                                                    | 1     | 1  | S03    |
| cugaugauaccuguucGguugagc                                                                                                    | 2     | 1  | S03    |
| cugaugauaccuguucAcaguugagc                                                                                                  | 1     | 1  | S03    |
| cugaugauaccuguucaguUagc                                                                                                     | 1     | 1  | S03    |
| cugaCgauaccuguucaguugagc                                                                                                    | 1     | 1  | S03    |
| cugaugGuaccuguucaguugagc                                                                                                    | 1     | 1  | S03    |
| cugaugauaccuguucaAuugagc                                                                                                    | 1     | 1  | S03    |
| cCgaugauaccuguucaguugagc                                                                                                    | 1     | 1  | S03    |
| cugaugauaccuguucaguugagU                                                                                                    | 17    | 1  | S03    |
| cugaugauaccuguucaguugagA                                                                                                    | 7     | 1  | S03    |
| ugaugauaccuguucagu                                                                                                          | 1     | 0  | S03    |
| ugaugauaccuguucaguug                                                                                                        | 1     | 0  | S03    |
| ugaugauaccuguucaguuga                                                                                                       | 1     | 0  | S03    |
| ugaugauaccuguucaguugagU                                                                                                     | 1     | 1  | S03    |
| ugaugauaccuguucagCugagc                                                                                                     | 1     | 1  | S03    |
| ugaugauaccuguucaguugagc                                                                                                     | 7     | 0  | S03    |
| ugaugauaccuguucaguugagcu                                                                                                    | 35    | 0  | S03    |

Mature

Star

|                     |                                 |                                    |                                 |    |       |
|---------------------|---------------------------------|------------------------------------|---------------------------------|----|-------|
| ucgcccguuuagccggggc | cugaugauaccguuucaguugagc        | uaucuuuuuagcuaacucucaggugucacucaaa | ccuucuuuugagcucugcuuauucuuaguca |    |       |
| .....               | .ugaugauaccguuucaguugagcC.....  |                                    |                                 | 8  | 1 S03 |
| .....               | .ugaugauGccguuucaguugagcu.....  |                                    |                                 | 1  | 1 S03 |
| .....               | .ugaugauaccguuucaguugagcG.....  |                                    |                                 | 1  | 1 S03 |
| .....               | .ugaugauaccguuucaguugagcA.....  |                                    |                                 | 2  | 1 S03 |
| .....               | .ugaugauaccguuucaguugagcU.....  |                                    |                                 | 1  | 1 S03 |
| .....               | .gaugauaccguuucaguugagc.....    |                                    |                                 | 3  | 0 S03 |
| .....               | .gaugauaccguuucaguugagcA.....   |                                    |                                 | 1  | 1 S03 |
| .....               | .gaugauaccguuucaguugagcU.....   |                                    |                                 | 1  | 1 S03 |
| .....               | .gaugauaccguuucaguugagc.....    |                                    |                                 | 1  | 1 S03 |
| .....               | .gaugauaccguuucaguugagc.....    |                                    |                                 | 10 | 0 S03 |
| .....               | .gaugauaccguuucaguugagcC.....   |                                    |                                 | 1  | 1 S03 |
| .....               | .gaugauaccguuucaguugagcua.....  |                                    |                                 | 16 | 0 S03 |
| .....               | .gaugauaccguuucaguugagcCa.....  |                                    |                                 | 1  | 1 S03 |
| .....               | .gaugauaccguuucaguugagcU.....   |                                    |                                 | 1  | 1 S03 |
| .....               | .augauaccguuucaguug.....        |                                    |                                 | 1  | 0 S03 |
| .....               | .augauaccguuucaguugagc.....     |                                    |                                 | 4  | 0 S03 |
| .....               | .augauaccguuucaguugagcu.....    |                                    |                                 | 3  | 0 S03 |
| .....               | .augauaccguuucaguugagcuaG.....  |                                    |                                 | 1  | 1 S03 |
| .....               | .augauaccguuucaguugagcua.....   |                                    |                                 | 13 | 0 S03 |
| .....               | .augauaccguuucaguugagcuauc..... |                                    |                                 | 1  | 0 S03 |
| .....               | .ugauaccguuucaguugGgc.....      |                                    |                                 | 1  | 1 S03 |
| .....               | .ugauaccguuucaguugagcG.....     |                                    |                                 | 1  | 1 S03 |
| .....               | .ugauaccguuucaguugagcu.....     |                                    |                                 | 5  | 0 S03 |
| .....               | .ugauaccguuucaguugagcC.....     |                                    |                                 | 2  | 1 S03 |
| .....               | .ugauaccguuucaguugagcA.....     |                                    |                                 | 2  | 1 S03 |
| .....               | .ugauaccguuucaguugagcU.....     |                                    |                                 | 1  | 1 S03 |
| .....               | .ugauaccguuucaguugagcua.....    |                                    |                                 | 3  | 0 S03 |
| .....               | .ugauaccguuucaguugagcGa.....    |                                    |                                 | 1  | 1 S03 |
| .....               | .ugauaccguuucaguugagcuaU.....   |                                    |                                 | 1  | 1 S03 |
| .....               | .gauaccguuucaguugagc.....       |                                    |                                 | 2  | 0 S03 |
| .....               | .gauaccguuucaguugagcu.....      |                                    |                                 | 1  | 0 S03 |
| .....               | .gauaccguuucaguugagcua.....     |                                    |                                 | 2  | 0 S03 |
| .....               | .gauaccguuucaguugagcua.....     |                                    |                                 | 1  | 0 S03 |
| .....               | .gauaccguuucaguugagcua.....     |                                    |                                 | 1  | 1 S03 |
| .....               | .gauaccguuucaguugagcuaU.....    |                                    |                                 | 1  | 1 S03 |
| .....               | .gauaccguuucaguugagcuauc.....   |                                    |                                 | 4  | 0 S03 |
| .....               | .auaccguuucaguugagc.....        |                                    |                                 | 2  | 0 S03 |
| .....               | .auaccguuucaguugagcua.....      |                                    |                                 | 1  | 0 S03 |
| .....               | .auaccguuucaguugagcua.....      |                                    |                                 | 1  | 1 S03 |
| .....               | .auaccguuucaguugagcuauc.....    |                                    |                                 | 5  | 0 S03 |
| .....               | .auaccguuucaguugagcuaA.....     |                                    |                                 | 1  | 1 S03 |
| .....               | .auaccguuucaguugagcuaucU.....   |                                    |                                 | 1  | 1 S03 |
| .....               | .auaccguuucaguugagcuaucG.....   |                                    |                                 | 1  | 1 S03 |
| .....               | .auaccguuucaguugagcuaucA.....   |                                    |                                 | 9  | 1 S03 |
| .....               | .auaccguuucaguugagcuaucCu.....  |                                    |                                 | 2  | 0 S03 |
| .....               | .uaccguuucaguugagc.....         |                                    |                                 | 1  | 0 S03 |
| .....               | .uaccguuucaguugagcU.....        |                                    |                                 | 1  | 1 S03 |
| .....               | .uaccguuucaguugagcuaucA.....    |                                    |                                 | 1  | 1 S03 |
| .....               | .uaccguuucaguugagcuaucG.....    |                                    |                                 | 1  | 1 S03 |
| .....               | .uaccguuucaguugagcuaucC.....    |                                    |                                 | 3  | 0 S03 |
| .....               | .uaccguuucaguugagcuaucA.....    |                                    |                                 | 4  | 1 S03 |
| .....               | .accguuucaguugagcuauc.....      |                                    |                                 | 1  | 0 S03 |
| .....               | .accguuucaguugagcuaucAu.....    |                                    |                                 | 1  | 1 S03 |
| .....               | .accguuucaguugagcuaucCu.....    |                                    |                                 | 1  | 0 S03 |
| .....               | .ccguuucaguugagcuaucU.....      |                                    |                                 | 1  | 1 S03 |
| .....               | .cuguuucaguugagcuaucA.....      |                                    |                                 | 1  | 1 S03 |
| .....               | .agccggggAACugaugauaccu.....    |                                    |                                 | 1  | 1 S04 |
| .....               | .agccggggAACugaugauaccgu.....   |                                    |                                 | 4  | 1 S04 |
| .....               | .gcccggggAACugaugauaccgu.....   |                                    |                                 | 1  | 1 S04 |
| .....               | .gcccggggAACugaugauaccguuu..... |                                    |                                 | 1  | 1 S04 |
| .....               | .gggcacugaugauaccguuca.....     |                                    |                                 | 2  | 0 S04 |
| .....               | .gggcacugaugauaccguucagu.....   |                                    |                                 | 1  | 0 S04 |
| .....               | .gggGacugaugauaccguucagu.....   |                                    |                                 | 1  | 1 S04 |
| .....               | .acugaugauaccguucaA.....        |                                    |                                 | 1  | 1 S04 |
| .....               | .cugaugauaccguuca.....          |                                    |                                 | 1  | 1 S04 |
| .....               | .cugaugauaccguucagu.....        |                                    |                                 | 2  | 0 S04 |
| .....               | .cugaugauaccguucaguug.....      |                                    |                                 | 1  | 0 S04 |
| .....               | .cugaugauaccguucaguugG.....     |                                    |                                 | 1  | 1 S04 |



Mature

Star

| Sequence                      | Count | Category | Label |
|-------------------------------|-------|----------|-------|
| ucgcccguuuagccggggca          | 3     | 0        | S04   |
| .cugaugauaccguuucaguugga      | 95    | 0        | S04   |
| .cugaugauaccguuucaguugagc     | 1     | 1        | S04   |
| .cugaugauaccguuucaguugagcG    | 1     | 1        | S04   |
| .cugaugauaccguuucaguugagcA    | 6     | 1        | S04   |
| .cuAaugauaccguuucaguugagc     | 1     | 1        | S04   |
| .Augaugauaccguuucaguugagc     | 1     | 1        | S04   |
| .cugGugauaccguuucaguugagc     | 2     | 1        | S04   |
| .cugaugauGccguuucaguugagc     | 1     | 1        | S04   |
| .cugaugauaccguuucaguugagU     | 27    | 1        | S04   |
| .cugaugauaccguuucagUgagc      | 1     | 1        | S04   |
| .cugaugauaccguuucagUcagUgagc  | 1     | 1        | S04   |
| .cugaugauaccguuucagUcagUgagcG | 1     | 1        | S04   |
| .cugaugauaccguuucagUcagUgagcC | 1     | 1        | S04   |
| .cugaugauaccguuucagUgagcU     | 1     | 0        | S04   |
| .ugaugauaccguuucaguu          | 1     | 0        | S04   |
| .ugaugauaccguuucaguuG         | 1     | 0        | S04   |
| .ugaugauaccguuucaguuU         | 1     | 1        | S04   |
| .ugaugauaccguuucagUGuga       | 1     | 1        | S04   |
| .ugaugauaccguuucagUgagU       | 1     | 1        | S04   |
| .ugaugauaccguuucagUgagA       | 1     | 1        | S04   |
| .ugaugauaccguuucagUgagc       | 16    | 0        | S04   |
| .ugaugauaccguuucagUgagcA      | 1     | 1        | S04   |
| .ugaugauaccguuucagUgagcG      | 2     | 1        | S04   |
| .ugaugauaccguuucagUgagcC      | 6     | 1        | S04   |
| .ugaugauaccguuucagUgagcU      | 36    | 0        | S04   |
| .gaugauaccguuucagUgag         | 2     | 0        | S04   |
| .gaugauaccguuucagUgagc        | 8     | 0        | S04   |
| .gaugauaccguuucagUgagcA       | 1     | 1        | S04   |
| .gaugauaccguuucagUgagcU       | 6     | 0        | S04   |
| .gaugauaccguuucagUgagcC       | 1     | 1        | S04   |
| .gaugauaccguuucagUgagcua      | 7     | 0        | S04   |
| .augauaccguuucagUgagc         | 4     | 0        | S04   |
| .aGgauaccguuucagUgagc         | 1     | 1        | S04   |
| .augauaccguuucagUgagU         | 3     | 1        | S04   |
| .augauaccguuucagUgagcU        | 3     | 0        | S04   |
| .augauaccguuucagUgagcG        | 2     | 1        | S04   |
| .aGgauaccguuucagUgagcua       | 1     | 1        | S04   |
| .augauaccguuucagUgagcuaU      | 9     | 0        | S04   |
| .ugauaccguuucagUgagc          | 1     | 0        | S04   |
| .ugauaccguuucagUgagcC         | 1     | 1        | S04   |
| .ugauaccguuucagUgagcU         | 3     | 0        | S04   |
| .ugauaccguuucagUgagcUgagcU    | 1     | 1        | S04   |
| .ugauaccguuucagUgagcua        | 4     | 0        | S04   |
| .ugauaccguuucagUgagcuauc      | 1     | 0        | S04   |
| .gauaccguuucagUgagc           | 2     | 0        | S04   |
| .gauaccguuucagUgagcC          | 2     | 1        | S04   |
| .gauaUcguuucagUgagcU          | 1     | 1        | S04   |
| .gauaccguuucagUgagcU          | 1     | 0        | S04   |
| .gauaccguuucagUgagcua         | 1     | 0        | S04   |
| .gauaccguuucagUgagcuaU        | 1     | 0        | S04   |
| .auaccguuucagUgagU            | 1     | 1        | S04   |
| .auaccguuucagUgagcU           | 1     | 0        | S04   |
| .auaccguuucagUgagcuauc        | 2     | 0        | S04   |
| .GuaccguuucagUgagcuauc        | 1     | 1        | S04   |
| .auaccguuucagUgagcuaucG       | 3     | 1        | S04   |
| .auaccguuucagUgagcuaucA       | 3     | 1        | S04   |
| .auaccguuucagUgagcuaucc       | 2     | 0        | S04   |
| .uaccguuucagUgagcA            | 1     | 1        | S04   |
| .uaccguuucagUgagcuauc         | 2     | 0        | S04   |
| .uaccguuucagUgagcuaucc        | 3     | 0        | S04   |
| .uaccguuucagUgagcuaucA        | 2     | 1        | S04   |
| .uaccguuucagUgagcuaucG        | 1     | 1        | S04   |
| .uaccguuucagUgagcuauccU       | 1     | 0        | S04   |
| .uaccguuucagUgagcuauccA       | 2     | 1        | S04   |
| .ccguuucagUgagcuauc           | 1     | 0        | S04   |
| .ccuucuuuugagcucugcuucua      | 1     | 0        | S04   |

Provisional ID : chrC09\_2562228  
 Score total : 1136.7  
 Score for star read(s) : 3.9  
 Score for read counts : 1130.9  
 Score for mfe : 1.9  
 Score for randfold : 0  
 Score for cons. seed :  
 Total read count : 2230  
 Mature read count : 2224  
 Loop read count : 0  
 Star read count : 6

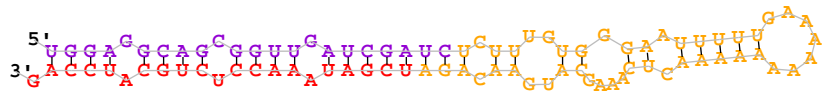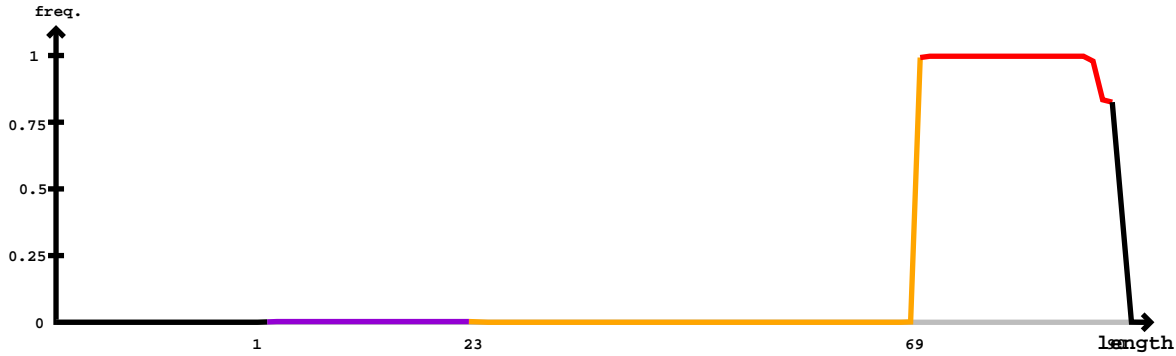

**Star**

**Mature**

| 5' | Star                         | Mature                     | -3'            | obs           | mm              | sample                  |       |    |        |
|----|------------------------------|----------------------------|----------------|---------------|-----------------|-------------------------|-------|----|--------|
| 5' | gaaaaaggagcgaaagauc          | uggaggcagcggguugaucgauc    | uuuggggauuuuug | aaaaaaaaaaacu | aaagcaugaacagau | CGAUAAACCUCUGCAUCCAGCGG | reads | mm | sample |
|    | gaaaaaggagcgaaagauc          | ggaggcagcggguugaucgauc     | uuuggggauuuuug | aaaaaaaaaaacu | aaagcaugaacagau | CGAUAAACCUCUGCAUCCAGCGG | exp   |    |        |
|    | .....(.....)                 | .....(((((((.....))))))    | .....))))))    | .....))))))   | .....))))))     | .....))))))             | 3     | 0  | S03    |
|    | .....uggaggcagcggguugaucgauc | .....                      | .....          | .....         | .....           | .....                   | 1     | 0  | S03    |
|    | .....ggaggcagcggguugaucgauc  | .....                      | .....          | .....         | .....           | .....                   | 1     | 0  | S03    |
|    | .....                        | .....aucgauaaaccucugcauc   | .....          | .....         | .....           | .....                   | 1     | 0  | S03    |
|    | .....                        | .....aucgauaaaccucugcauca  | .....          | .....         | .....           | .....                   | 1     | 0  | S03    |
|    | .....                        | .....ucgauaaaccucugcauA    | .....          | .....         | .....           | .....                   | 1     | 1  | S03    |
|    | .....                        | .....ucgauaaaccucugcauU    | .....          | .....         | .....           | .....                   | 4     | 1  | S03    |
|    | .....                        | .....ucgauaaaccucugcauc    | .....          | .....         | .....           | .....                   | 18    | 0  | S03    |
|    | .....                        | .....ucgauaaaccucugcaucc   | .....          | .....         | .....           | .....                   | 1     | 1  | S03    |
|    | .....                        | .....ucgauaaaccucugcGucc   | .....          | .....         | .....           | .....                   | 1     | 1  | S03    |
|    | .....                        | .....ucgauaaaccucugcaucA   | .....          | .....         | .....           | .....                   | 24    | 1  | S03    |
|    | .....                        | .....ucgGuaaaccucugcaucc   | .....          | .....         | .....           | .....                   | 1     | 1  | S03    |
|    | .....                        | .....ucgaCaaaccucugcaucc   | .....          | .....         | .....           | .....                   | 1     | 1  | S03    |
|    | .....                        | .....ucgauaaaccucugcaucG   | .....          | .....         | .....           | .....                   | 4     | 1  | S03    |
|    | .....                        | .....Gcgauaaaccucugcaucc   | .....          | .....         | .....           | .....                   | 2     | 1  | S03    |
|    | .....                        | .....ucgauaaaccucugcaucc   | .....          | .....         | .....           | .....                   | 89    | 0  | S03    |
|    | .....                        | .....Ccgauaaaccucugcaucc   | .....          | .....         | .....           | .....                   | 1     | 1  | S03    |
|    | .....                        | .....ucgauaaaccucugcaucU   | .....          | .....         | .....           | .....                   | 38    | 1  | S03    |
|    | .....                        | .....ucgauaaaccucugcaucca  | .....          | .....         | .....           | .....                   | 8     | 0  | S03    |
|    | .....                        | .....ucgauaaGccucugcauccag | .....          | .....         | .....           | .....                   | 1     | 1  | S03    |
|    | .....                        | .....ucgauaaaccucGgcauccag | .....          | .....         | .....           | .....                   | 1     | 1  | S03    |
|    | .....                        | .....Acgauaaaccucugcauccag | .....          | .....         | .....           | .....                   | 1     | 1  | S03    |
|    | .....                        | .....ucgauaaaccucugcaCccag | .....          | .....         | .....           | .....                   | 3     | 1  | S03    |
|    | .....                        | .....Ncgauaaaccucugcauccag | .....          | .....         | .....           | .....                   | 3     | 1  | S03    |
|    | .....                        | .....ucgauaaaccucugcauccaA | .....          | .....         | .....           | .....                   | 81    | 1  | S03    |
|    | .....                        | .....ucgauaaaccucugcUuccag | .....          | .....         | .....           | .....                   | 2     | 1  | S03    |
|    | .....                        | .....ucgauaaaccucUcauccag  | .....          | .....         | .....           | .....                   | 1     | 1  | S03    |
|    | .....                        | .....ucgauaaaccucugcauccaC | .....          | .....         | .....           | .....                   | 1     | 1  | S03    |
|    | .....                        | .....ucgauaaacUucugcauccag | .....          | .....         | .....           | .....                   | 1     | 1  | S03    |
|    | .....                        | .....ucgauaaaccucugcauccUg | .....          | .....         | .....           | .....                   | 5     | 1  | S03    |
|    | .....                        | .....ucgauaaaccucGgcauccag | .....          | .....         | .....           | .....                   | 4     | 1  | S03    |
|    | .....                        | .....uUgauaaaccucugcauccag | .....          | .....         | .....           | .....                   | 2     | 1  | S03    |
|    | .....                        | .....ucgauaaUccucugcauccag | .....          | .....         | .....           | .....                   | 1     | 1  | S03    |
|    | .....                        | .....uAgauaaaccucugcauccag | .....          | .....         | .....           | .....                   | 1     | 1  | S03    |

Star

Mature

|                                                                                                            |     |   |     |
|------------------------------------------------------------------------------------------------------------|-----|---|-----|
| gaaaaaggagcgaaagaucuggaggcagcggugaucgaucuuugugggaauuuuugaaaaaaaaaacuaagcaugaaacgagucgaaaaaccucugcauccagcgg |     |   |     |
| .....ucgaaaaaccucugcGuccag...                                                                              | 2   | 1 | S03 |
| .....ucgAaaaccucugcauccag...                                                                               | 1   | 1 | S03 |
| .....ucgaaaaaccAcugcauccag...                                                                              | 1   | 1 | S03 |
| .....ucgaaaaUcucugcauccag...                                                                               | 2   | 1 | S03 |
| .....ucAuaaaaccucugcauccag...                                                                              | 1   | 1 | S03 |
| .....ucgaaaaaccucugGauccag...                                                                              | 1   | 1 | S03 |
| .....ucgaaaaaccucugcauccaU...                                                                              | 6   | 1 | S03 |
| .....ucgaaaaaccCugcauccag...                                                                               | 4   | 1 | S03 |
| .....Ccgaaaaaccucugcauccag...                                                                              | 2   | 1 | S03 |
| .....Gcgaaaaaccucugcauccag...                                                                              | 3   | 1 | S03 |
| .....ucUuaaaaccucugcauccag...                                                                              | 1   | 1 | S03 |
| .....ucgaaaaCccucugcauccag...                                                                              | 1   | 1 | S03 |
| .....ucgaaaaaccucugcaucAag...                                                                              | 2   | 1 | S03 |
| .....ucgGuaaaccucugcauccag...                                                                              | 2   | 1 | S03 |
| .....ucgaaaaaccucugcauccag...                                                                              | 720 | 0 | S03 |
| .....ucgauaGaccucugcauccag...                                                                              | 1   | 1 | S03 |
| .....ucgaaaaaccucugcauccGg...                                                                              | 5   | 1 | S03 |
| .....ucgaCaaaccucugcauccag...                                                                              | 4   | 1 | S03 |
| .....ucgaaaaaccucugcauccagc..                                                                              | 4   | 0 | S03 |
| .....ucgaaaaaccucugcauccagA..                                                                              | 2   | 1 | S03 |
| .....cgaaaaaccucugcaucca....                                                                               | 1   | 0 | S03 |
| .....cgaaaaaccucugcauccag...                                                                               | 1   | 0 | S03 |
| .....cgaaaaaccucugcauccagc..                                                                               | 3   | 0 | S03 |
| .....ggaggcagcgguuUaucgauc.....                                                                            | 1   | 1 | S04 |
| .....ggaggcagcggugaucgauc.....                                                                             | 1   | 0 | S04 |
| .....aucgaaaaaccucugcauccag...                                                                             | 1   | 0 | S04 |
| .....ucgaaaaaccucugcauc.....                                                                               | 17  | 0 | S04 |
| .....ucgaCaaaccucugcaucc.....                                                                              | 1   | 1 | S04 |
| .....ucUuaaaaccucugcaucc.....                                                                              | 3   | 1 | S04 |
| .....ucgaaaaaccucugcaucA.....                                                                              | 14  | 1 | S04 |
| .....ucgaaaaaccucugcaucU.....                                                                              | 36  | 1 | S04 |
| .....ucgauGaacccucugcaucc.....                                                                             | 2   | 1 | S04 |
| .....ucgauaaGccucugcaucc.....                                                                              | 1   | 1 | S04 |
| .....ucgauaaaccuGugcaucc.....                                                                              | 3   | 1 | S04 |
| .....ucCauaaaccucugcaucc.....                                                                              | 1   | 1 | S04 |
| .....ucgauaaaccucugcauUc.....                                                                              | 1   | 1 | S04 |
| .....ucgauaaaccucugcaucc.....                                                                              | 93  | 0 | S04 |
| .....ucgauaaaccucugcaucG.....                                                                              | 4   | 1 | S04 |
| .....Ncgauaaaccucugcaucc.....                                                                              | 1   | 1 | S04 |
| .....ucgauaaaccucuUcaucc.....                                                                              | 1   | 1 | S04 |
| .....ucgauaaaccucugcauccG.....                                                                             | 2   | 1 | S04 |
| .....ucgauaaaccucugcauccC.....                                                                             | 1   | 1 | S04 |
| .....ucgauaaaccuGugcaucca....                                                                              | 1   | 1 | S04 |
| .....ucgauaaaccucugcaucca....                                                                              | 6   | 0 | S04 |
| .....ucgauaaaccucuUcauccag...                                                                              | 2   | 1 | S04 |
| .....ucgauaaGccucugcauccag...                                                                              | 4   | 1 | S04 |
| .....Gcgaaaaaccucugcauccag...                                                                              | 2   | 1 | S04 |
| .....ucUuaaaaccucugcauccag...                                                                              | 1   | 1 | S04 |
| .....ucgaAaaaccucugcauccag...                                                                              | 2   | 1 | S04 |
| .....ucgaaaaaccucCgcauccag...                                                                              | 2   | 1 | S04 |
| .....ucgauaaaccucugcGuccag...                                                                              | 2   | 1 | S04 |
| .....ucgauaaaccucugcauccag...                                                                              | 779 | 0 | S04 |
| .....ucgauaaCccucugcauccag...                                                                              | 1   | 1 | S04 |
| .....ucgauaaaccucugcaAaccag...                                                                             | 1   | 1 | S04 |
| .....ucgaaaaUcucugcauccag...                                                                               | 1   | 1 | S04 |
| .....uGgaaaaaccucugcauccag...                                                                              | 2   | 1 | S04 |
| .....ucAuaaaaccucugcauccag...                                                                              | 4   | 1 | S04 |
| .....ucgauaaaccuGugcauccag...                                                                              | 5   | 1 | S04 |
| .....ucgauaaaccuUugcauccag...                                                                              | 2   | 1 | S04 |
| .....ucgGuaaaccucugcauccag...                                                                              | 4   | 1 | S04 |
| .....ucgauaaaccucugcaucUag...                                                                              | 4   | 1 | S04 |
| .....ucgauaaaccucugcauccaA...                                                                              | 93  | 1 | S04 |
| .....ucgauaaaccucugcauccaU...                                                                              | 8   | 1 | S04 |
| .....ucCauaaaccucugcauccag...                                                                              | 1   | 1 | S04 |
| .....Ccgaaaaaccucugcauccag...                                                                              | 2   | 1 | S04 |
| .....Acgauaaaccucugcauccag...                                                                              | 1   | 1 | S04 |
| .....ucgauaaaccAcugcauccag...                                                                              | 1   | 1 | S04 |
| .....ucgauaaaccucugUauccag...                                                                              | 2   | 1 | S04 |
| .....ucgauaaaccucugcauccaC...                                                                              | 3   | 1 | S04 |

Star

Mature

|                                                                                                          |   |   |     |
|----------------------------------------------------------------------------------------------------------|---|---|-----|
| gaaaagagcgaaagaugcuggaggcagcggugaucgaucucuugugggaauuuugaaaaaaaaaacuaagcaugaacagaucgauaaaccucugcauccagcgg |   |   |     |
| .....ucgauaaaccCcugcauccag...                                                                            | 3 | 1 | S04 |
| .....uUgauaaaccucugcauccag...                                                                            | 2 | 1 | S04 |
| .....Ncgauaaaccucugcauccag...                                                                            | 4 | 1 | S04 |
| .....ucgauaaaccucugcauccUg...                                                                            | 5 | 1 | S04 |
| .....ucgauGaaccucugcauccag...                                                                            | 1 | 1 | S04 |
| .....ucgauaaaccucugcauccGg...                                                                            | 1 | 1 | S04 |
| .....ucgauaaaccucAgcauccag...                                                                            | 1 | 1 | S04 |
| .....ucgauaaaccucuCcauccag...                                                                            | 1 | 1 | S04 |
| .....ucgauaaaccucugcauccagA..                                                                            | 3 | 1 | S04 |
| .....ucgauaaaccucugcauccaUc..                                                                            | 1 | 1 | S04 |
| .....ucgauaaaccucugcauccagG..                                                                            | 1 | 1 | S04 |
| .....ucgauaaaccucugcauccagc..                                                                            | 3 | 0 | S04 |
| .....ucgauaaaccucugcauccagcU.                                                                            | 1 | 1 | S04 |
| .....cgauaaaccucugcauccag...                                                                             | 1 | 0 | S04 |
| .....cgauaaaccucugcauccagG..                                                                             | 2 | 1 | S04 |
| .....cgauaaaccucugcauccUagc..                                                                            | 1 | 1 | S04 |
| .....cgauaaaccucugcauccagc..                                                                             | 2 | 0 | S04 |





Provisional ID : chrC09\_2601798  
 Score total : 11.6  
 Score for star read(s) : 3.9  
 Score for read counts : 6.8  
 Score for mfe : 0.9  
 Score for randfold : 0  
 Score for cons. seed :  
 Total read count : 25  
 Mature read count : 24  
 Loop read count : 0  
 Star read count : 1

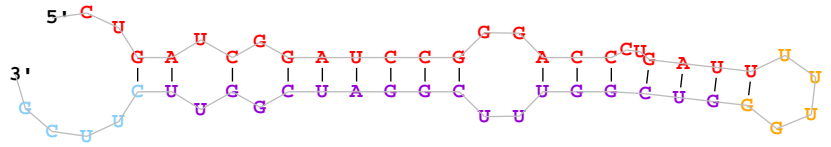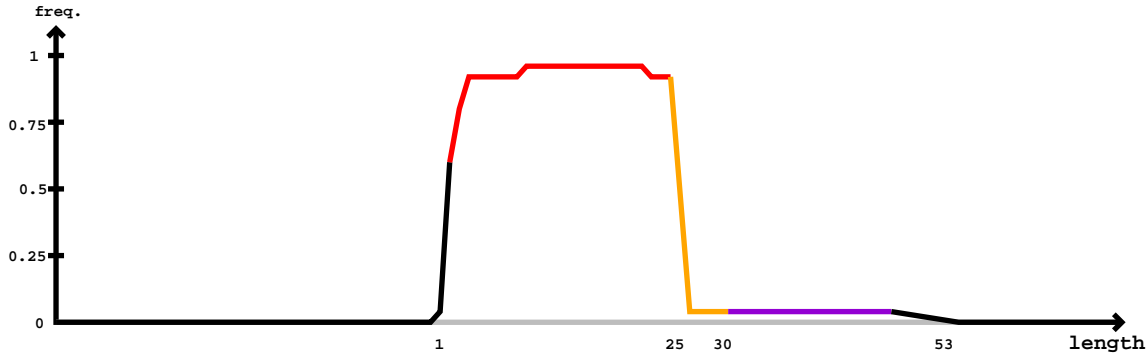

**Mature                      Star**

|                                                                                                                                                                                                                                                                                                                                                                                                                                                                                                                                                                                                                                                                                                                                        |                                                                                                                                                                                                                                                                                                                                          |
|----------------------------------------------------------------------------------------------------------------------------------------------------------------------------------------------------------------------------------------------------------------------------------------------------------------------------------------------------------------------------------------------------------------------------------------------------------------------------------------------------------------------------------------------------------------------------------------------------------------------------------------------------------------------------------------------------------------------------------------|------------------------------------------------------------------------------------------------------------------------------------------------------------------------------------------------------------------------------------------------------------------------------------------------------------------------------------------|
| 5' - uacaacaguuuaggacccauuugguuuuuuauccaggu <u>cugaucggauccgggaccugauuuuuugggucgguuucggaucgguu</u> cuucgguucuuugcagccuaa<br>uacaacaguuuaggacccauuugguuuuuuauccaggu <u>cugaucggauccgggaccugauuuuuugggucgguuucggaucgguu</u> cuucgguucuuugcagccuaa<br>.....((..(((.....(((.....))))))..((..(((.....(((.....))))))..))))..)).....<br>.....ucugaucggauUcgggaccugauu.....<br>.....cugaucggauUcgggaccugauu.....<br>.....ugaucggauUcgggaccugauu.....<br>.....ugaucggauUcgggaccugauuu.....<br>.....gaucggauUcgggaccugauu.....<br>.....gucgguuucggaucgguu.....<br><br>.....cugaucggauUcgggaccugauu.....<br>.....ugaucggauUcgggaccugauuu.....<br>.....gaucggauUcgggaccug.....<br>.....gaucggauUcgggaccugauu.....<br>.....aucgggaccugauuuuugg..... | -3'    obs<br>exp<br><br>reads    mm       sample<br>1        1        S03<br>8        1        S03<br>1        1        S03<br>1        1        S03<br>1        1        S03<br>1        0        S03<br><br>6        1        S04<br>3        1        S04<br>1        1        S04<br>1        1        S04<br>1        0        S04 |
|----------------------------------------------------------------------------------------------------------------------------------------------------------------------------------------------------------------------------------------------------------------------------------------------------------------------------------------------------------------------------------------------------------------------------------------------------------------------------------------------------------------------------------------------------------------------------------------------------------------------------------------------------------------------------------------------------------------------------------------|------------------------------------------------------------------------------------------------------------------------------------------------------------------------------------------------------------------------------------------------------------------------------------------------------------------------------------------|

Provisional ID : chrC09\_2619998  
 Score total : 0.4  
 Score for star read(s) : 3.9  
 Score for read counts : -4.9  
 Score for mfe : 1.4  
 Score for randfold : 0  
 Score for cons. seed :  
 Total read count : 2  
 Mature read count : 1  
 Loop read count : 0  
 Star read count : 1

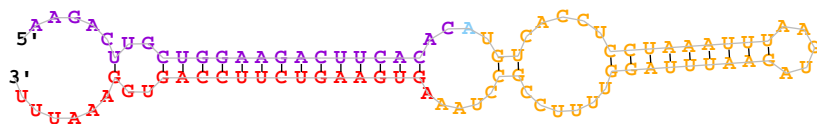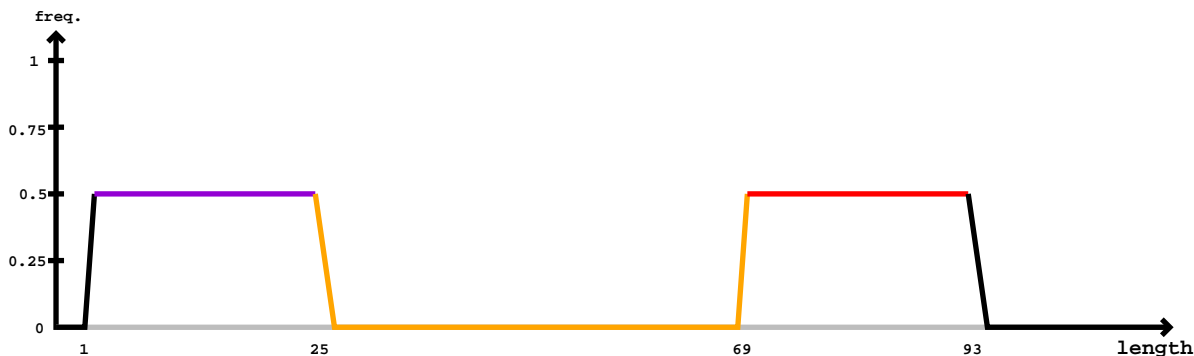

**Star**

**Mature**

| 5' | Sequence                                                                                  | -3' | obs | exp | reads | mm | sample |
|----|-------------------------------------------------------------------------------------------|-----|-----|-----|-------|----|--------|
|    | agaagacuugcuggaagacuucacac                                                                |     |     |     |       |    |        |
|    | augucaccuccuaaaauuaaguagaauuuagguuuuuccgccuaaagugaagucuccaguggaaaauuuuuucauguauuagaucuuaa |     |     |     |       |    |        |
|    | agaagacuugcuggaagacuucacac                                                                |     |     |     |       |    |        |
|    | augucaccuccuaaaauuaaguagaauuuagguuuuuccgccuaaagugaagucuccaguggaaaauuuuuucauguauuagaucuuaa |     |     |     |       |    |        |
|    | .....(((((((.....(((((((.....(((((((.....)))))))))).....)))))))).....)))))))).....        |     |     |     | 1     | 0  | S03    |
|    | .....agugaagucuccaguggaaaauuu.....                                                        |     |     |     |       |    |        |
|    | .....aagacuugcuggaagacuucacac.....                                                        |     |     |     | 1     | 0  | S04    |



Provisional ID : chrC09\_2629961  
 Score total : 0.1  
 Score for star read(s) : -1.3  
 Score for read counts : 0  
 Score for mfe : 1.4  
 Score for randfold : 0  
 Score for cons. seed :  
 Total read count : 67  
 Mature read count : 67  
 Loop read count : 0  
 Star read count : 0

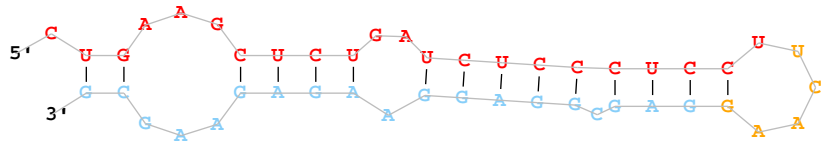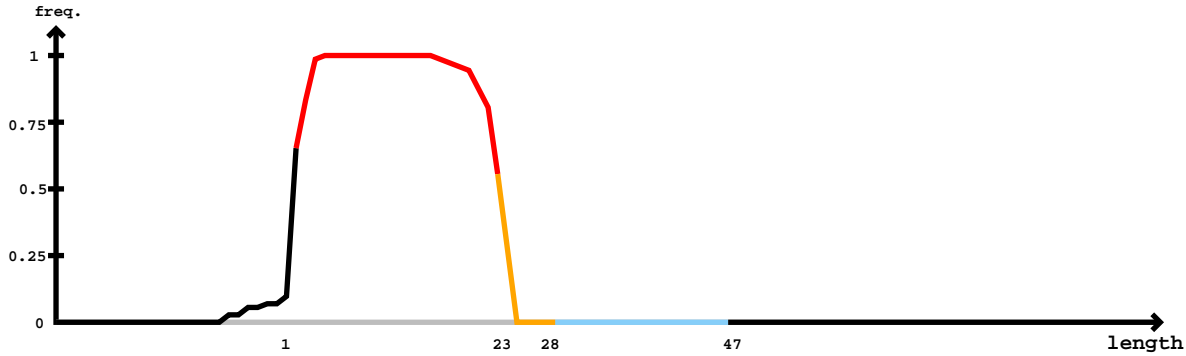

Mature                      Star

| 5' -                                                                                                       | -3'                       | exp                | reads                                     | mm | sample |
|------------------------------------------------------------------------------------------------------------|---------------------------|--------------------|-------------------------------------------|----|--------|
| uccuuuccucucuauuuugugcg                                                                                    | cugaagcucugaucucccucucaag | gagcggaggaagagaagc | caucuugggauuacgugugcccgugccagccccgaucacac |    |        |
| .....(((.....(((.....(((.....(((.....(((.....))))))))).....)))))).....(((.....(((.....)))))).....))))..... |                           |                    |                                           |    |        |
| .....uugugcgcugaagcucugaucu.....                                                                           |                           |                    | 1                                         | 0  | S03    |
| .....gugcgcugaagcucugaucuc.....                                                                            |                           |                    | 1                                         | 0  | S03    |
| .....Acugaagcucugaucucccucu.....                                                                           |                           |                    | 2                                         | 1  | S03    |
| .....cugaagcucugaucucccu.....                                                                              |                           |                    | 1                                         | 0  | S03    |
| .....cugaagcucugaucucccA.....                                                                              |                           |                    | 1                                         | 1  | S03    |
| .....cugaagcucugaucucccG.....                                                                              |                           |                    | 1                                         | 1  | S03    |
| .....cugaagcucugaucucccuc.....                                                                             |                           |                    | 1                                         | 0  | S03    |
| .....cugaagcucugaucucccucc.....                                                                            |                           |                    | 3                                         | 0  | S03    |
| .....cugaagcucugaucucccucU.....                                                                            |                           |                    | 1                                         | 1  | S03    |
| .....cugaagcucugaucucccucA.....                                                                            |                           |                    | 3                                         | 1  | S03    |
| .....cugaagcucugaucucccucu.....                                                                            |                           |                    | 10                                        | 0  | S03    |
| .....cugaagcucugaucucccucuG.....                                                                           |                           |                    | 3                                         | 1  | S03    |
| .....ugaagcucugaucucccucU.....                                                                             |                           |                    | 1                                         | 1  | S03    |
| .....ugaagcucugaucucccucc.....                                                                             |                           |                    | 2                                         | 0  | S03    |
| .....ugaagcucugaucucccuccu.....                                                                            |                           |                    | 3                                         | 0  | S03    |
| .....ugaagcucugaucucccuccuG.....                                                                           |                           |                    | 1                                         | 1  | S03    |
| .....ugaagcucugaucucccuccuu.....                                                                           |                           |                    | 1                                         | 0  | S03    |
| .....gaagcucugaucucccuc.....                                                                               |                           |                    | 1                                         | 0  | S03    |
| .....gaagcucugaucucccucc.....                                                                              |                           |                    | 1                                         | 0  | S03    |
| .....uugugcgcugaagcucugaucucc.....                                                                         |                           |                    |                                           |    |        |
| .....gugcgcugaagcucugaucucc.....                                                                           |                           |                    | 1                                         | 0  | S04    |
| .....gugcgcugaagcucugaucuccuc.....                                                                         |                           |                    | 1                                         | 0  | S04    |
| .....cugaagcucugaucucccu.....                                                                              |                           |                    | 1                                         | 0  | S04    |
| .....cugaagcucugaucucccuc.....                                                                             |                           |                    | 1                                         | 0  | S04    |
| .....cugaagcucugaucucccucU.....                                                                            |                           |                    | 1                                         | 1  | S04    |
| .....cugaagcucugaucucccucc.....                                                                            |                           |                    | 1                                         | 0  | S04    |
| .....cugaagcucugaucucccuccu.....                                                                           |                           |                    | 3                                         | 0  | S04    |
| .....cugaagcucugaucucccuccG.....                                                                           |                           |                    | 1                                         | 1  | S04    |
| .....cugaagcucugaucucccuccC.....                                                                           |                           |                    | 1                                         | 1  | S04    |
| .....cugaagcucugaGcucccuccu.....                                                                           |                           |                    | 1                                         | 1  | S04    |
| .....cugaagcucugaucucccuccuu.....                                                                          |                           |                    | 1                                         | 0  | S04    |
| .....Ugaagcucugaucucccuccuu.....                                                                           |                           |                    | 1                                         | 1  | S04    |
| .....cugaagcucugaucucccuccuG.....                                                                          |                           |                    | 4                                         | 1  | S04    |

**Mature**

**Star**

|                          |                      |        |                  |                                            |   |   |     |
|--------------------------|----------------------|--------|------------------|--------------------------------------------|---|---|-----|
| uccuuuccucucacauuuugugcg | ugaagcucugaucuccuc   | cucaag | gagcggaggaagaagc | gcaucuugggauacguguugcccgugccagccccgaucacac |   |   |     |
| .....                    | ugaagcucugaucuccC    | .....  | .....            | .....                                      | 1 | 1 | S04 |
| .....                    | ugaagcucugaucuccucc  | .....  | .....            | .....                                      | 2 | 0 | S04 |
| .....                    | ugaagcucugaucuccuccC | .....  | .....            | .....                                      | 2 | 1 | S04 |
| .....                    | gaagcucugaucuccuA    | .....  | .....            | .....                                      | 1 | 1 | S04 |
| .....                    | gaagcucugaucuUccucc  | .....  | .....            | .....                                      | 1 | 1 | S04 |
| .....                    | gaagcucugaucuccucc   | .....  | .....            | .....                                      | 1 | 0 | S04 |
| .....                    | gaagcucugaucuccuccC  | .....  | .....            | .....                                      | 1 | 1 | S04 |
| .....                    | gaagcucugaucuccuccA  | .....  | .....            | .....                                      | 2 | 1 | S04 |
| .....                    | gaagcucugaucuccuccu  | .....  | .....            | .....                                      | 2 | 0 | S04 |
| .....                    | gaagcucugaucuccuccuu | .....  | .....            | .....                                      | 1 | 0 | S04 |
| .....                    | aagcucugaucuccucc    | .....  | .....            | .....                                      | 1 | 0 | S04 |

Provisional ID : chrC09\_2631818  
 Score total : 0.1  
 Score for star read(s) : -1.3  
 Score for read counts : 0  
 Score for mfe : 1.4  
 Score for randfold : 0  
 Score for cons. seed :  
 Total read count : 142  
 Mature read count : 141  
 Loop read count : 0  
 Star read count : 1

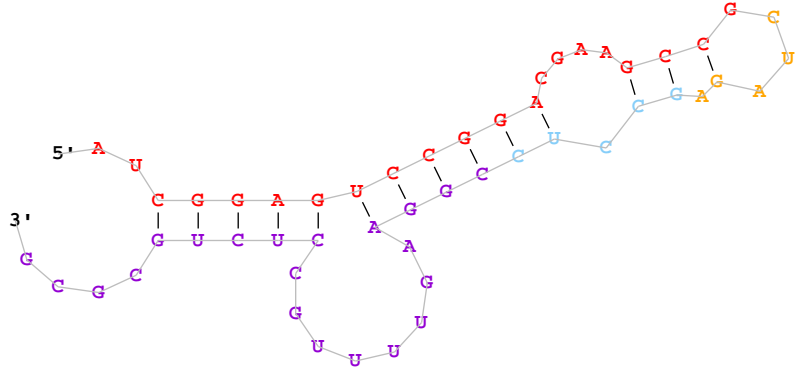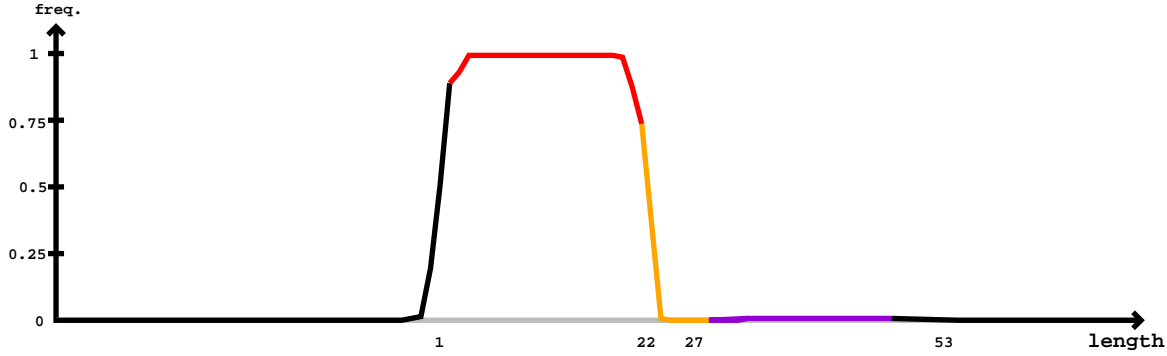

**Mature Star**

| 5'                                                                                                               | obs | reads | mm | sample |
|------------------------------------------------------------------------------------------------------------------|-----|-------|----|--------|
| ccucgucgauacgaagccguagccaccgaccacgcccgaauucggaguccggacgaagccgcuaagagccuccggaaguuuugccucugcgcgcgcgugaguuuaggcaccg | -3' | 1     | 1  | S03    |
| ccucgucgauacgaagccguagccaccgaccacgcccgaauucggaguccggacgaagccgcuaagagccuccggaaguuuugccucugcgcgcgcgugaguuuaggcaccg | exp | 2     | 0  | S03    |
| .....cCcaauucggaguccggacgaag.....                                                                                |     | 1     | 1  | S03    |
| .....caauucggaguccggacgaagc.....                                                                                 |     | 2     | 0  | S03    |
| .....caauucggaguccggacgaagA.....                                                                                 |     | 1     | 1  | S03    |
| .....caauucggaguccggacgaagcA.....                                                                                |     | 1     | 1  | S03    |
| .....caauucggaguccggacgaagcc.....                                                                                |     | 3     | 0  | S03    |
| .....caauucggaguccggacgaagccg.....                                                                               |     | 4     | 0  | S03    |
| .....caauucggaguccggacgaagccgc.....                                                                              |     | 6     | 0  | S03    |
| .....cauCcgaguccggacgaagccgc.....                                                                                |     | 1     | 1  | S03    |
| .....caauucggaguccggacgaagccgG.....                                                                              |     | 1     | 1  | S03    |
| .....aaucggaguccggacgaagc.....                                                                                   |     | 1     | 1  | S03    |
| .....aaucggaguccggacgaagc.....                                                                                   |     | 3     | 0  | S03    |
| .....aaucggaguccggacgaagcc.....                                                                                  |     | 5     | 0  | S03    |
| .....aaucggaguccggacgaagccA.....                                                                                 |     | 3     | 1  | S03    |
| .....aaucggaguccggacgaagccg.....                                                                                 |     | 14    | 0  | S03    |
| .....aaucggaguccggacgaagccgc.....                                                                                |     | 1     | 0  | S03    |
| .....aaucggaguccggacgaagccgA.....                                                                                |     | 1     | 1  | S03    |
| .....aucggaguccggacgaagc.....                                                                                    |     | 5     | 0  | S03    |
| .....aucggaguccggacgaagcG.....                                                                                   |     | 1     | 1  | S03    |
| .....aucggaguccggacgaagccA.....                                                                                  |     | 8     | 1  | S03    |
| .....aucggCgucggacgaagccg.....                                                                                   |     | 1     | 1  | S03    |
| .....aucggaguccggacgaagccg.....                                                                                  |     | 24    | 0  | S03    |
| .....aucggaguccggacgaagccgc.....                                                                                 |     | 4     | 0  | S03    |
| .....aucggaguccggacgaagcaccg.....                                                                                |     | 1     | 1  | S03    |
| .....ucggaguccggacgaagc.....                                                                                     |     | 1     | 0  | S03    |
| .....ucggaguccggacgaagccgG.....                                                                                  |     | 2     | 1  | S03    |
| .....ucggaguccggacgaagccgc.....                                                                                  |     | 1     | 0  | S03    |
| .....ucggaguccggacgaagccgG.....                                                                                  |     | 1     | 1  | S03    |
| .....cggaguccggacgaagcc.....                                                                                     |     | 3     | 0  | S03    |
| .....cggaguccggacgaagccg.....                                                                                    |     | 1     | 0  | S03    |
| .....cggaguccggacgaagccgG.....                                                                                   |     | 1     | 1  | S03    |
| .....cggaguccggacgaagccgc.....                                                                                   |     | 2     | 0  | S03    |
| .....cggaguccggacgaagccgcC.....                                                                                  |     | 1     | 1  | S03    |
| .....cggaaguuuugccucugcgcg.....                                                                                  |     | 1     | 0  | S03    |

Mature

Star

ccucgucgauacgaagccguagccaccgaccacgcccgaucggaguccggacgaagccgcuagagccucgggaaguuugccucugcgcgcgugaguuuaggcaccg

|                                    |   |   |     |
|------------------------------------|---|---|-----|
| .....gcaaucggaguccggacAaagc.....   | 1 | 1 | S04 |
| .....caaucggaguccggacgaagcA.....   | 1 | 1 | S04 |
| .....caaucggaguccggacgaagccA.....  | 1 | 1 | S04 |
| .....caaucggaguccggacgaagccgc..... | 4 | 0 | S04 |
| .....caaucggaguccggacgaagccgA..... | 1 | 1 | S04 |
| .....aaucggaguccggacgaagc.....     | 2 | 0 | S04 |
| .....aaucggaguccggacgaagcA.....    | 1 | 1 | S04 |
| .....aaucggaguccggacgaagcc.....    | 6 | 0 | S04 |
| .....aaucggaguccggacgGagccg.....   | 1 | 1 | S04 |
| .....aaucggaguccggacgaagccA.....   | 1 | 1 | S04 |
| .....aaucggaguccggacgaagccg.....   | 6 | 0 | S04 |
| .....aucggGguccggacgaagccg.....    | 1 | 1 | S04 |
| .....aucggaguccggacgaagccg.....    | 8 | 0 | S04 |
| .....aucggaguccggacgaagccA.....    | 2 | 1 | S04 |
| .....ucggaguccggacgaagccgA.....    | 1 | 1 | S04 |
| .....cggaguccggacgaagccgc.....     | 1 | 0 | S04 |





Provisional ID : chrC09\_2652674  
 Score total : 0.4  
 Score for star read(s) : -1.3  
 Score for read counts : 0  
 Score for mfe : 1.7  
 Score for randfold : 0  
 Score for cons. seed :  
 Total read count : 32  
 Mature read count : 29  
 Loop read count : 3  
 Star read count : 0

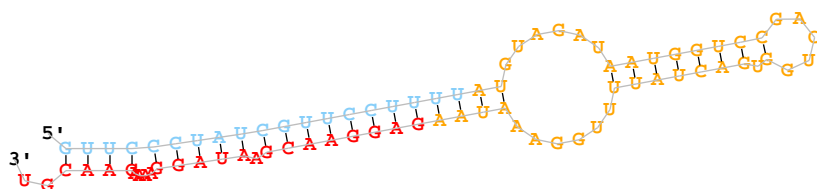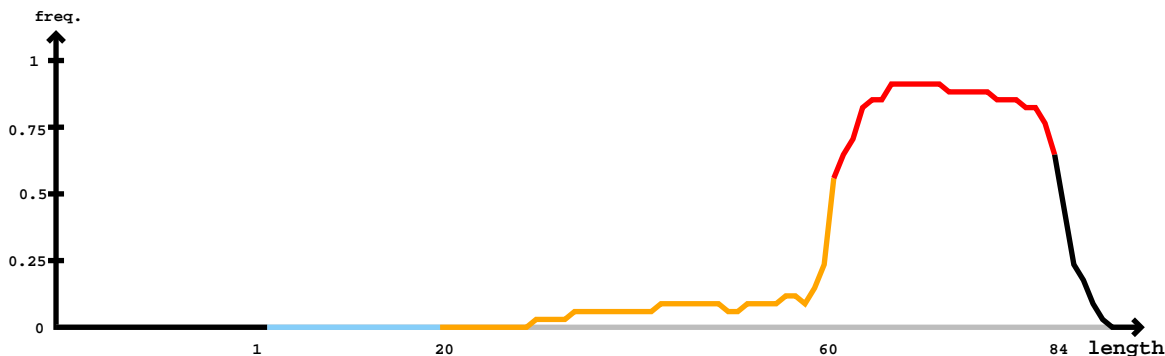

Star

Mature

| 5' -                                                                                                                           | 3' | exp | reads | mm | sample |
|--------------------------------------------------------------------------------------------------------------------------------|----|-----|-------|----|--------|
| aggaaauuuuuuccuucuc <u>guucccuacguuccuuuu</u> auguagauaaugguccgacuggugacuauuuuggaaa <u>agaggaaacgaaauaggaaaagaacgu</u> agagaaa |    |     |       |    |        |
| .....uccgacuggugacuauuuuggaaa.....                                                                                             |    |     | 1     | 0  | S03    |
| .....uggaaauaagaggaaacgaaau.....                                                                                               |    |     | 1     | 0  | S03    |
| .....agaggaaacgaaauaggaaaagaacg.....                                                                                           |    |     | 1     | 0  | S03    |
| .....gaggaaacgaaauaggaaaagaacgu.....                                                                                           |    |     | 3     | 0  | S03    |
| .....gaggaaacgaaauaggaaaagaacGC.....                                                                                           |    |     | 2     | 1  | S03    |
| .....aggaacgaaauaggaaaagaacg.....                                                                                              |    |     | 1     | 0  | S03    |
| .....aggaacgaaauaggaaaagaacgua.....                                                                                            |    |     | 1     | 0  | S03    |
| .....ggaacgaaauaggaaaagaacguag.....                                                                                            |    |     | 1     | 0  | S03    |
| .....gaacgaaauaggaaaagaacgua.....                                                                                              |    |     | 1     | 0  | S03    |
| .....gaacgaaauaggGaaagaacguaga.....                                                                                            |    |     | 1     | 1  | S03    |
| .....cgaaauaggaaaagaacguagag.....                                                                                              |    |     | 1     | 0  | S03    |
| .....cgaaauaggaaaGgaacguagaga.....                                                                                             |    |     | 1     | 1  | S03    |
| .....aGgguccgacuggugacuau.....                                                                                                 |    |     | 1     | 1  | S04    |
| .....ugacuauuuuggaaCuaa.....                                                                                                   |    |     | 1     | 1  | S04    |
| .....aaauagaggaaacgaaauaggaaU.....                                                                                             |    |     | 1     | 1  | S04    |
| .....aaagaggaaacgaaauaggaaaaUa.....                                                                                            |    |     | 1     | 1  | S04    |
| .....aaagaggaaacgaaauaggaaaagaac.....                                                                                          |    |     | 1     | 0  | S04    |
| .....agaggaaacgaaauaggaaaagaacU.....                                                                                           |    |     | 1     | 1  | S04    |
| .....agaggaaacgaaauaggaaaagaacg.....                                                                                           |    |     | 1     | 0  | S04    |
| .....gaggaaacgaaauaggaaaagaalUgu.....                                                                                          |    |     | 1     | 1  | S04    |
| .....gaCgaacgaaauaggaaaagaacgu.....                                                                                            |    |     | 1     | 1  | S04    |
| .....gaggaaacgaaauaggaaaagaacgu.....                                                                                           |    |     | 4     | 0  | S04    |
| .....gaggaaacgaaauaggaaaagaacGC.....                                                                                           |    |     | 1     | 1  | S04    |
| .....aggaacgaaauaggaaaagaalU.....                                                                                              |    |     | 1     | 1  | S04    |
| .....ggaacgaaauaggaaaagaacguag.....                                                                                            |    |     | 1     | 0  | S04    |
| .....gaacgaaauaggaaaagaacguaga.....                                                                                            |    |     | 2     | 0  | S04    |
| .....aacgaaauaggaaaagaalUguagag.....                                                                                           |    |     | 1     | 1  | S04    |





Provisional ID : chrC09\_2663545  
 Score total : 117.6  
 Score for star read(s) : 3.9  
 Score for read counts : 112.8  
 Score for mfe : 0.9  
 Score for randfold : 0  
 Score for cons. seed :  
 Total read count : 233  
 Mature read count : 222  
 Loop read count : 0  
 Star read count : 11

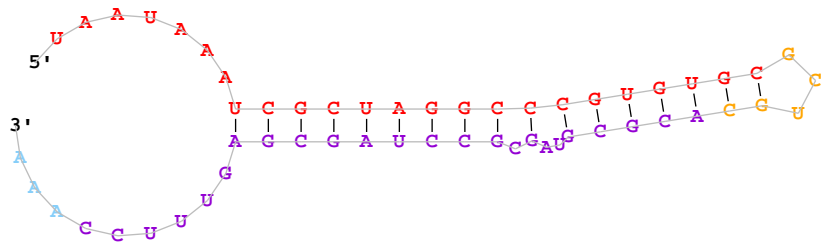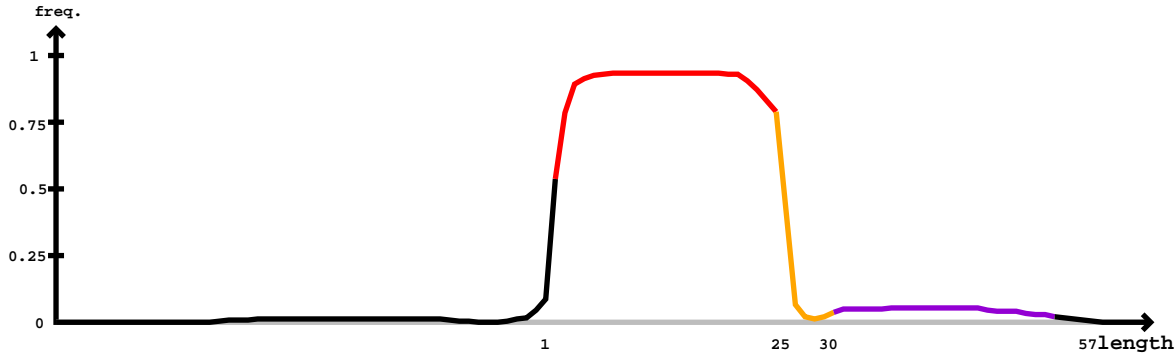

**Mature** **Star**

| 5' -                                                                                                          | reads | mm | sample |
|---------------------------------------------------------------------------------------------------------------|-------|----|--------|
| aaaaaacaaaaaucaucuccgagacuucuccgauuuuuucuccgcuuuuuuaauaaaucgcuaggcccgugugcgcugc                               | obs   |    |        |
| aaaaaacaaaaaucaucuccgagacuucuccgauuuuuucuccgcuuuuuuaauaaaucgcuaggcccgugugcgcugc                               | exp   |    |        |
| .....(((.....))).....(((.....(((.....(((.....(((.....(((.....(((.....))).....))).....))).....))).....)))..... |       |    |        |
| .....aucuccgagacuucuccgauuuuu.....                                                                            | 1     | 0  | S03    |
| .....ucuccgagacuucuccgauuuuu.....                                                                             | 1     | 0  | S03    |
| .....guuuuuuaauaaaucgcuaggcc.....                                                                             | 1     | 0  | S03    |
| .....uuuuuuuaauaaaucgcuaggccgC.....                                                                           | 1     | 1  | S03    |
| .....uuuuuuuaauaaaucgcuaggcccg.....                                                                           | 1     | 0  | S03    |
| .....uuuuuuuaauaaaucgcuaggcccg.....                                                                           | 2     | 0  | S03    |
| .....uuuuuuuaauaaaucgcuaggcccg.....                                                                           | 1     | 0  | S03    |
| .....uuuuuuuaauaaaucgcuaggcccg.....                                                                           | 3     | 0  | S03    |
| .....uuuuuuuaauaaaucgcuaggcccg.....                                                                           | 3     | 0  | S03    |
| .....uuuuuuuaauaaaucgcuaggcccg.....                                                                           | 1     | 1  | S03    |
| .....uuuuuuuaauaaaucgcuaggcccg.....                                                                           | 3     | 0  | S03    |
| .....uuuuuuuaauaaaucgcuaggcccg.....                                                                           | 1     | 0  | S03    |
| .....uuuuuuuaauaaaucgcuaggcccg.....                                                                           | 2     | 0  | S03    |
| .....uuuuuuuaauaaaucgcuaggcccg.....                                                                           | 1     | 1  | S03    |
| .....uuuuuuuaauaaaucgcuaggcccg.....                                                                           | 1     | 0  | S03    |
| .....uuuuuuuaauaaaucgcuaggcccg.....                                                                           | 6     | 1  | S03    |
| .....uuuuuuuaauaaaucgcuaggcccg.....                                                                           | 2     | 1  | S03    |
| .....uuuuuuuaauaaaucgcuaggcccg.....                                                                           | 41    | 0  | S03    |
| .....uuuuuuuaauaaaucgcuaggcccg.....                                                                           | 1     | 1  | S03    |
| .....uuuuuuuaauaaaucgcuaggcccg.....                                                                           | 14    | 1  | S03    |
| .....uuuuuuuaauaaaucgcuaggcccg.....                                                                           | 1     | 1  | S03    |
| .....uuuuuuuaauaaaucgcuaggcccg.....                                                                           | 1     | 1  | S03    |
| .....uuuuuuuaauaaaucgcuaggcccg.....                                                                           | 1     | 0  | S03    |
| .....uuuuuuuaauaaaucgcuaggcccg.....                                                                           | 1     | 1  | S03    |
| .....uuuuuuuaauaaaucgcuaggcccg.....                                                                           | 1     | 1  | S03    |
| .....uuuuuuuaauaaaucgcuaggcccg.....                                                                           | 1     | 1  | S03    |
| .....uuuuuuuaauaaaucgcuaggcccg.....                                                                           | 1     | 1  | S03    |
| .....uuuuuuuaauaaaucgcuaggcccg.....                                                                           | 5     | 1  | S03    |
| .....uuuuuuuaauaaaucgcuaggcccg.....                                                                           | 1     | 1  | S03    |
| .....uuuuuuuaauaaaucgcuaggcccg.....                                                                           | 1     | 1  | S03    |
| .....uuuuuuuaauaaaucgcuaggcccg.....                                                                           | 1     | 1  | S03    |
| .....uuuuuuuaauaaaucgcuaggcccg.....                                                                           | 16    | 0  | S03    |







Provisional ID : chrC09\_random\_2951640  
 Score total : 0.6  
 Score for star read(s) : -1.3  
 Score for read counts : 0  
 Score for mfe : 1.9  
 Score for randfold : 0  
 Score for cons. seed :  
 Total read count : 28  
 Mature read count : 27  
 Loop read count : 1  
 Star read count : 0

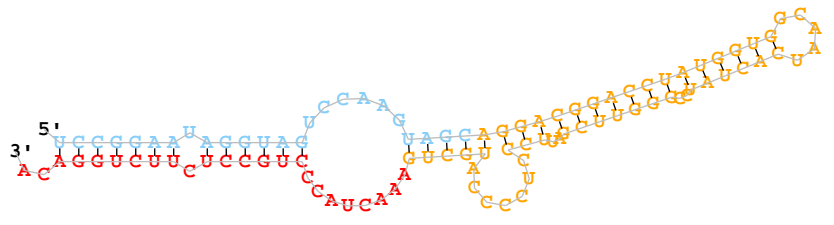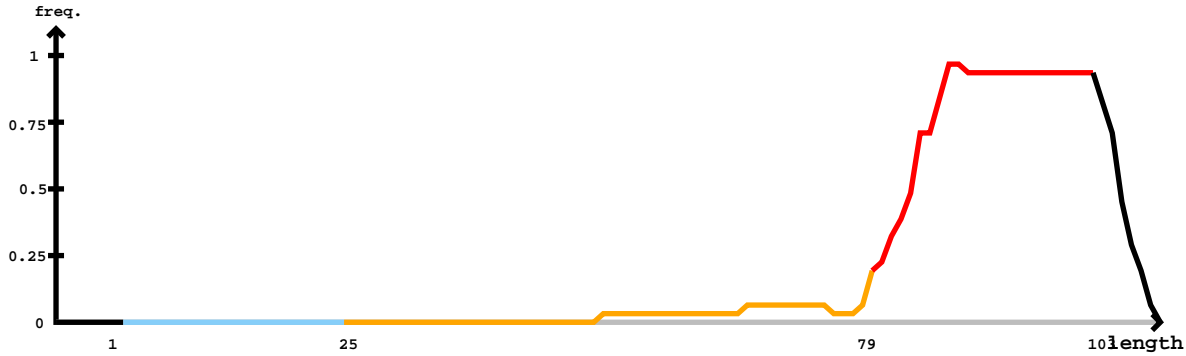

**Star**

**Mature**

| 5'                                                                                                             | 3' | exp | reads | mm | sample |
|----------------------------------------------------------------------------------------------------------------|----|-----|-------|----|--------|
| aaauguccggaauagguaguccaaguagcaggacggaccuaugguggcaaucauaccggguucgauuccucccccaugcugaaacuaccugccucucuggacacccaaag |    |     |       |    |        |
| .....aaacuaccugccucucuggacG.....                                                                               |    |     | 1     | 1  | S03    |
| .....cuaccugccucucuggacacc.....                                                                                |    |     | 1     | 0  | S03    |
| .....uaccugccucucuggacacG....                                                                                  |    |     | 1     | 1  | S03    |
| .....uaccugccucucuggacaccG...                                                                                  |    |     | 1     | 1  | S03    |
| .....accugccucucuggacacA....                                                                                   |    |     | 1     | 1  | S03    |
| .....accugccucucuggacacca...                                                                                   |    |     | 1     | 0  | S03    |
| .....accugccucucuggacaccaa...                                                                                  |    |     | 1     | 0  | S03    |
| .....cugccucucuggacaccU...                                                                                     |    |     | 1     | 1  | S03    |
| .....cugccucucuggacaccaa...                                                                                    |    |     | 1     | 0  | S03    |
| .....auccggguucgauuccucccccau.....                                                                             |    |     | 1     | 0  | S04    |
| .....ccucccaugcugaaacuaccu.....                                                                                |    |     | 1     | 0  | S04    |
| .....gaaacuaccugccucucuggaca.....                                                                              |    |     | 1     | 0  | S04    |
| .....aaacuaccugccucucuggaca.....                                                                               |    |     | 3     | 0  | S04    |
| .....aacuaccugccucucuggaca.....                                                                                |    |     | 1     | 0  | S04    |
| .....acuaccugccucucuggacacc.....                                                                               |    |     | 2     | 0  | S04    |
| .....acuaccugccucucuggacacU....                                                                                |    |     | 1     | 1  | S04    |
| .....cuaccugccucucuggacac.....                                                                                 |    |     | 1     | 0  | S04    |
| .....uaccugccucucuggacaccaa...                                                                                 |    |     | 1     | 0  | S04    |
| .....accugccucucuggacacca...                                                                                   |    |     | 1     | 0  | S04    |
| .....accugccucucuggacaccaa...                                                                                  |    |     | 1     | 0  | S04    |
| .....accugccucucuggacaccaa...                                                                                  |    |     | 2     | 0  | S04    |
| .....ccugccucucuggacacc.....                                                                                   |    |     | 2     | 0  | S04    |
| .....ccugccucucuggacacca...                                                                                    |    |     | 1     | 0  | S04    |
| .....ccugccucucuggacaccaaag                                                                                    |    |     | 1     | 0  | S04    |
| .....Nugccucucuggacaccaa...                                                                                    |    |     | 1     | 1  | S04    |
| .....cugccucucuggacaccaaU                                                                                      |    |     | 1     | 1  | S04    |

Provisional ID : chrC09\_random\_2954328  
 Score total : 0.7  
 Score for star read(s) : -1.3  
 Score for read counts : 0  
 Score for mfe : 2  
 Score for randfold : 0  
 Score for cons. seed :  
 Total read count : 209  
 Mature read count : 163  
 Loop read count : 42  
 Star read count : 4

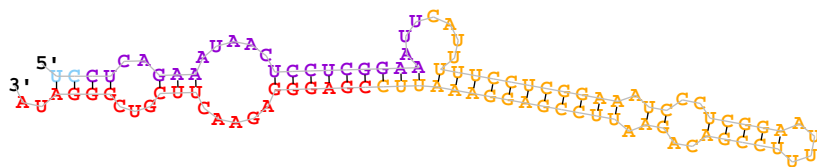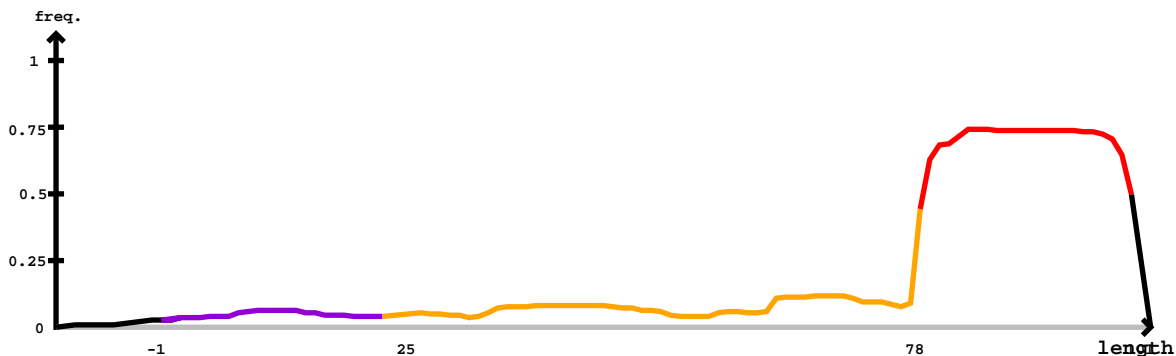

**Star**

**Mature**

| 5'                                                                            | obs | reads | mm  | sample |
|-------------------------------------------------------------------------------|-----|-------|-----|--------|
| cgaacaaguccucagaaaauaccucggaauu                                               | -3' |       |     |        |
| cauuuuuccucggaauuccucggaauuuuccgacagaaauuccgaggaaaauuccgaggagaacuucgucgggaaau | exp |       |     |        |
| cgaaacaaguccucagaaaauaccucggaauu                                              | 1   | 1     | S03 |        |
| cauuuuuccucggaauuccucggaauuuuccgacagaaauuccgaggaaaauuccgaggagaacuucgucgggaaau | 1   | 1     | S03 |        |
| cgaaacaaguccucagaaaauaccA                                                     | 1   | 0     | S03 |        |
| caaguccucagaaaauaccucg                                                        | 1   | 0     | S03 |        |
| aaguccucagaaaauaccuc                                                          | 1   | 0     | S03 |        |
| aguccucagaaaauaccuc                                                           | 1   | 0     | S03 |        |
| guccucagaaaauaccucgAaa                                                        | 1   | 1     | S03 |        |
| cucagaaaauaccucgAaaauu                                                        | 2   | 1     | S03 |        |
| agaaaauaccucgAaaauuca                                                         | 1   | 1     | S03 |        |
| aaauaccucggaauucauuuu                                                         | 1   | 0     | S03 |        |
| auaacuccucggaauucauuuu                                                        | 1   | 0     | S03 |        |
| uaacuccucggaauucauuuu                                                         | 1   | 0     | S03 |        |
| uucauuuuuccucggaauuccu                                                        | 1   | 0     | S03 |        |
| cauuuuuccucggaauuccucg                                                        | 1   | 0     | S03 |        |
| auuuuuuccucggaauuccucg                                                        | 1   | 0     | S03 |        |
| ccucggaauuccucgga                                                             | 1   | 0     | S03 |        |
| cucggaauuccucgga                                                              | 1   | 0     | S03 |        |
| cucggaauuccucggaUuu                                                           | 1   | 1     | S03 |        |
| ucggaauuccucggaauuu                                                           | 1   | 0     | S03 |        |
| cggaauuccucggaauu                                                             | 1   | 0     | S03 |        |
| auuuuccgacagaaauuccgag                                                        | 1   | 0     | S03 |        |
| auuuuccgacagaaauuccgA                                                         | 1   | 1     | S03 |        |
| auuuuccgacagaaauuccgagU                                                       | 1   | 1     | S03 |        |
| uuccgacagaaauuccgaggaaUuu                                                     | 1   | 1     | S03 |        |
| gacagaaauuccgaggUaa                                                           | 1   | 1     | S03 |        |
| gacagaaauuccgaggaaa                                                           | 1   | 0     | S03 |        |
| gacagaaauuccgagUgaaa                                                          | 1   | 1     | S03 |        |
| acagaaauuccgaggaaaauuccga                                                     | 1   | 0     | S03 |        |
| aaauuccgaggaaaauuccga                                                         | 1   | 0     | S03 |        |
| auuccgaggaaaauuccga                                                           | 2   | 0     | S03 |        |
| Guuccgaggaaaauuccgagg                                                         | 1   | 1     | S03 |        |
| auuccgaggaaaauuccgagU                                                         | 1   | 1     | S03 |        |
| auuccgaggaaaauuccgagg                                                         | 2   | 0     | S03 |        |
| auuccgaggaaaauuccgagUg                                                        | 1   | 1     | S03 |        |

Star

Mature

|                                                                                                              |    |   |     |
|--------------------------------------------------------------------------------------------------------------|----|---|-----|
| cgaaacaagucucagaaaauaacuccucggaaaucauuuuucccggaauccucccggaauuuuccgacagaaucaggagaaauuccgagggagaaucucgucgggaau |    |   |     |
| .....uuccgaggaauuccgag.....                                                                                  | 1  | 0 | S03 |
| .....Nccgagggagaacucgucggga...                                                                               | 1  | 1 | S03 |
| .....ccgagggagaaucucguc.....                                                                                 | 1  | 0 | S03 |
| .....ccgagggagaacucgucggga...                                                                                | 1  | 0 | S03 |
| .....cgagggagaacucgucggg.....                                                                                | 2  | 0 | S03 |
| .....cgagggagaacucgucggga...                                                                                 | 2  | 0 | S03 |
| .....cgagggagaacucgAcgggau..                                                                                 | 1  | 1 | S03 |
| .....cgagggagaacucgucgggau..                                                                                 | 7  | 0 | S03 |
| .....cgagggagaacucguGgggau..                                                                                 | 1  | 1 | S03 |
| .....cgagggagaacucgucgggaua..                                                                                | 18 | 0 | S03 |
| .....cgagggagaacucgucgggauG..                                                                                | 2  | 1 | S03 |
| .....cgagggagaacucgucgggauU..                                                                                | 4  | 1 | S03 |
| .....cgagggCagaacucgucgggaua..                                                                               | 1  | 1 | S03 |
| .....Ncgagggagaacucgucgggaua..                                                                               | 1  | 1 | S03 |
| .....cgagggagaacucgucgggaCa..                                                                                | 1  | 1 | S03 |
| .....cgagggagaacucgucgggauau..                                                                               | 3  | 0 | S03 |
| .....cgagggagaacucgucgggauUu..                                                                               | 1  | 1 | S03 |
| .....gagggagaacucgucggg.....                                                                                 | 1  | 0 | S03 |
| .....gagggagaacucgucggga...                                                                                  | 1  | 0 | S03 |
| .....gagggagaacucgucgggU..                                                                                   | 1  | 1 | S03 |
| .....gagggagaacucgucgggaG..                                                                                  | 1  | 1 | S03 |
| .....gagggagaacucgucgggaC..                                                                                  | 2  | 1 | S03 |
| .....gagggagaacucgucgggau..                                                                                  | 10 | 0 | S03 |
| .....gagggagaacucgucgggaua..                                                                                 | 8  | 0 | S03 |
| .....gagggagaacucgucgggauG..                                                                                 | 2  | 1 | S03 |
| .....gagggagaacucgucgggauU..                                                                                 | 1  | 1 | S03 |
| .....gagggagaacucgucgggauUu..                                                                                | 1  | 1 | S03 |
| .....agggagaacucgucggga...                                                                                   | 1  | 0 | S03 |
| .....agggagaacucgucgggaC..                                                                                   | 1  | 1 | S03 |
| .....agggagaacucgucgggaua..                                                                                  | 2  | 0 | S03 |
| .....agggagaacucgucgggauU..                                                                                  | 2  | 1 | S03 |
| .....gggagaacucgucgggaua..                                                                                   | 2  | 0 | S03 |
| .....gggagaacucgucgggauU..                                                                                   | 1  | 1 | S03 |
| .....gggagaacucgucgggau..                                                                                    | 1  | 0 | S03 |
| .....gggagaacucgucgggauU..                                                                                   | 1  | 1 | S03 |
| .....gggagaacucgucgggauUu..                                                                                  | 1  | 1 | S03 |
| .....gagaacucgucgggauG..                                                                                     | 2  | 1 | S03 |
| .....gagaacucgucgggauU..                                                                                     | 2  | 1 | S03 |
| .....gagaacucgucgggauUu..                                                                                    | 2  | 1 | S03 |
| .....gagaacucgucgggauCu..                                                                                    | 1  | 1 | S03 |
| .....agaacucgucgggauUu..                                                                                     | 1  | 1 | S03 |
| .....aauaacuccucggaaaucauu..                                                                                 | 1  | 0 | S04 |
| .....aauaacuccucggaaaucauuu..                                                                                | 1  | 0 | S04 |
| .....auuAuuuuucccggaauccucg.....                                                                             | 1  | 1 | S04 |
| .....ucauuuuucccggaaucccuU..                                                                                 | 1  | 1 | S04 |
| .....cauuuuucccggaauccucgg.....                                                                              | 1  | 0 | S04 |
| .....uuccucggaaucuccucgg.....                                                                                | 1  | 0 | S04 |
| .....ccucggaaucuccucgga.....                                                                                 | 1  | 0 | S04 |
| .....cucggaaucuccucggaC.....                                                                                 | 1  | 1 | S04 |
| .....ucggaaucuccucggaau.....                                                                                 | 2  | 0 | S04 |
| .....ucggaaucuccucggaauuuu..                                                                                 | 1  | 0 | S04 |
| .....aaaucucccggaauuuuccgac.....                                                                             | 1  | 0 | S04 |
| .....gaauuuccgacagaaucaggU..                                                                                 | 1  | 1 | S04 |
| .....aauuuuccgacagaaucaggg.....                                                                              | 1  | 0 | S04 |
| .....cAgacagaaucaggagaaau.....                                                                               | 2  | 1 | S04 |
| .....auuccgaggaauuccgagg.....                                                                                | 4  | 0 | S04 |
| .....cgaggaauuccgacggag.....                                                                                 | 1  | 1 | S04 |
| .....ccgagggagaacucgucggg.....                                                                               | 1  | 0 | S04 |
| .....ccgagggagaacucgucggga...                                                                                | 1  | 0 | S04 |
| .....cgagggagaacucgucggg.....                                                                                | 1  | 0 | S04 |
| .....cgagggagaacucgucggga...                                                                                 | 1  | 0 | S04 |
| .....cgagggauaacucgucgggau..                                                                                 | 1  | 1 | S04 |
| .....cgagggagaacucgucgggau..                                                                                 | 3  | 0 | S04 |
| .....cgagggagaacucgucgggauU..                                                                                | 7  | 1 | S04 |
| .....cgagggagaacucgucgggauG..                                                                                | 4  | 1 | S04 |
| .....cgagggagaacucgucgggaua..                                                                                | 13 | 0 | S04 |
| .....cgagggagaacucgucgggauUu..                                                                               | 1  | 1 | S04 |
| .....cgagggagaacucgucgggauuu..                                                                               | 3  | 0 | S04 |
| .....gagggagaacucgucggga...                                                                                  | 2  | 0 | S04 |

Star

Mature

|            |                                                                                                  |   |   |     |
|------------|--------------------------------------------------------------------------------------------------|---|---|-----|
| cgaacaaguc | cucagaaauaacuccucggaaaucauuuuuccucggaaucccucggaauuuuccgacagaauccgaggaaauucgagggagaacucgucgggauau |   |   |     |
| .....      | .....gagggagaacucgucgggaG..                                                                      | 1 | 1 | S04 |
| .....      | .....gagggagaacucgucgggau..                                                                      | 3 | 0 | S04 |
| .....      | .....gagggagaacucgucgggauU.                                                                      | 2 | 1 | S04 |
| .....      | .....gagggagaacucgucgggaua.                                                                      | 5 | 0 | S04 |
| .....      | .....agggagaacucgucggg....                                                                       | 1 | 0 | S04 |
| .....      | .....agggagaacucgucggga...                                                                       | 2 | 0 | S04 |
| .....      | .....agggagaacucgucgggau..                                                                       | 1 | 0 | S04 |
| .....      | .....agggagaacucgucgggauG.                                                                       | 1 | 1 | S04 |
| .....      | .....agggagaacucgucgggauU.                                                                       | 1 | 1 | S04 |
| .....      | .....gggagaacucgucgggauUu                                                                        | 2 | 1 | S04 |
| .....      | .....ggagaacucgucgggauU.                                                                         | 1 | 1 | S04 |
| .....      | .....ggagaacucgucgggauC.                                                                         | 1 | 1 | S04 |
| .....      | .....ggagaacucgucgggauCu                                                                         | 1 | 1 | S04 |
| .....      | .....ggagaacucgucgggauGu                                                                         | 1 | 1 | S04 |
| .....      | .....gagaacucgucgggauU.                                                                          | 1 | 1 | S04 |
| .....      | .....gagaacucgucgggaua.                                                                          | 3 | 0 | S04 |
| .....      | .....Uagaacucgucgggauau                                                                          | 1 | 1 | S04 |
| .....      | .....gagaacucgucgggauau                                                                          | 2 | 0 | S04 |







Star

Mature

|                                     |                                                 |                      |           |    |   |
|-------------------------------------|-------------------------------------------------|----------------------|-----------|----|---|
| gguaucguuucgucggaaauaaaaacguucgucgg | aaauucgucagaaauucgacgacuuucugacgaauccaagaaacguc | auuccgacgaacuuccgacg | auuuacgau |    |   |
| .....                               | .....                                           | .....                | .....     | 15 | 0 |
| .....                               | .....                                           | .....                | .....     | 6  | 1 |
| .....                               | .....                                           | .....                | .....     | 1  | 1 |
| .....                               | .....                                           | .....                | .....     | 2  | 1 |
| .....                               | .....                                           | .....                | .....     | 1  | 1 |
| .....                               | .....                                           | .....                | .....     | 84 | 0 |
| .....                               | .....                                           | .....                | .....     | 1  | 1 |
| .....                               | .....                                           | .....                | .....     | 4  | 0 |
| .....                               | .....                                           | .....                | .....     | 3  | 1 |
| .....                               | .....                                           | .....                | .....     | 1  | 0 |
| .....                               | .....                                           | .....                | .....     | 2  | 0 |
| .....                               | .....                                           | .....                | .....     | 2  | 1 |
| .....                               | .....                                           | .....                | .....     | 1  | 1 |
| .....                               | .....                                           | .....                | .....     | 4  | 1 |
| .....                               | .....                                           | .....                | .....     | 1  | 1 |
| .....                               | .....                                           | .....                | .....     | 1  | 1 |
| .....                               | .....                                           | .....                | .....     | 2  | 1 |
| .....                               | .....                                           | .....                | .....     | 34 | 0 |
| .....                               | .....                                           | .....                | .....     | 1  | 1 |
| .....                               | .....                                           | .....                | .....     | 1  | 1 |
| .....                               | .....                                           | .....                | .....     | 1  | 1 |
| .....                               | .....                                           | .....                | .....     | 1  | 0 |
| .....                               | .....                                           | .....                | .....     | 1  | 0 |
| .....                               | .....                                           | .....                | .....     | 2  | 0 |



Star

Mature

|                                                                                                   |     |   |     |
|---------------------------------------------------------------------------------------------------|-----|---|-----|
| ggauccaacauuuuuuuuauucggauccgaaucggccucucgggauuuccggauucggauucggauaaagucucaggccuagguggaagagcaaagu |     |   |     |
| .....ggauucgaaucggauucggauaa.....                                                                 | 4   | 0 | S03 |
| .....ggauucgaaucggauucggauUa.....                                                                 | 1   | 1 | S03 |
| .....gGucgaaucggauucggaua.....                                                                    | 1   | 1 | S03 |
| .....gaaucggauucggauaaaaagu.....                                                                  | 1   | 0 | S03 |
| .....aaucggauucggauaaaaCucu.....                                                                  | 1   | 1 | S03 |
| .....uccggUucucggauaaaaagucu.....                                                                 | 1   | 1 | S03 |
| .....uccggauucggauaaaaagucu.....                                                                  | 5   | 0 | S03 |
| .....uccggauucggauaaaaagucuG.....                                                                 | 1   | 1 | S03 |
| .....cggauucggauaaaaagu.....                                                                      | 1   | 0 | S03 |
| .....cggauucgUauaaaaagucu.....                                                                    | 1   | 1 | S03 |
| .....cggauucggauaaaaagucu.....                                                                    | 7   | 0 | S03 |
| .....cggauucggauGaaagucu.....                                                                     | 1   | 1 | S03 |
| .....cggauucggauaaaaagucucag.....                                                                 | 2   | 0 | S03 |
| .....cggauucUgaaaaagucucagg.....                                                                  | 1   | 1 | S03 |
| .....cggauucggauaaaaagucucagg.....                                                                | 1   | 0 | S03 |
| .....aucggauaaaaagucucaggccu.....                                                                 | 1   | 0 | S03 |
| .....cucggauaaaaagucucaggccua.....                                                                | 1   | 0 | S03 |
| .....cggauccgaaucggccucuccA.....                                                                  | 1   | 1 | S04 |
| .....uucggccucucggauucggau.....                                                                   | 1   | 0 | S04 |
| .....cucggauucggauuuucg.....                                                                      | 1   | 0 | S04 |
| .....cucggauucggauuuucggau.....                                                                   | 12  | 0 | S04 |
| .....cucggauucggauuuucggCu.....                                                                   | 1   | 1 | S04 |
| .....cggauucggauuuucgga.....                                                                      | 1   | 0 | S04 |
| .....cggauucggauuuucggaucg.....                                                                   | 1   | 0 | S04 |
| .....cggauucggauuuucgg.....                                                                       | 1   | 0 | S04 |
| .....cggauucggauuuucggau.....                                                                     | 3   | 0 | S04 |
| .....ggauuGcggauuuucggaucga.....                                                                  | 1   | 1 | S04 |
| .....uuuUggaucgaaucggauucgg.....                                                                  | 1   | 1 | S04 |
| .....ucggaucgaaucggauucggauU.....                                                                 | 11  | 1 | S04 |
| .....cggaucgaaucggGucucggau.....                                                                  | 1   | 1 | S04 |
| .....cggaucgaaucggauucggau.....                                                                   | 6   | 0 | S04 |
| .....cggaucgaaucggauucggauG.....                                                                  | 1   | 1 | S04 |
| .....cggaucgaaucggauucggauU.....                                                                  | 2   | 1 | S04 |
| .....cggaucgaaucggauucggaua.....                                                                  | 25  | 0 | S04 |
| .....ggaucgaaucggauucgg.....                                                                      | 2   | 0 | S04 |
| .....ggaucgaaucggauucggaa.....                                                                    | 4   | 0 | S04 |
| .....ggaucgaaucggauucggau.....                                                                    | 39  | 0 | S04 |
| .....ggaucgaaucggGucucggau.....                                                                   | 1   | 1 | S04 |
| .....ggaucgaaucggauucggaua.....                                                                   | 365 | 0 | S04 |
| .....ggaucgaaucggCaucucggaua.....                                                                 | 1   | 1 | S04 |
| .....ggaucgaaucggAucucggaua.....                                                                  | 1   | 1 | S04 |
| .....ggaucgaaucggGucucggaua.....                                                                  | 2   | 1 | S04 |
| .....ggaucgaaucggGucucggaua.....                                                                  | 1   | 1 | S04 |
| .....ggGucgaaucggauucggaua.....                                                                   | 1   | 1 | S04 |
| .....ggaucgaaucggauucggauG.....                                                                   | 108 | 1 | S04 |
| .....ggaCcgaaucggauucggaua.....                                                                   | 2   | 1 | S04 |
| .....gCaucgaaucggauucggaua.....                                                                   | 1   | 1 | S04 |
| .....ggaucgaaucggauucggaaG.....                                                                   | 4   | 1 | S04 |
| .....ggaucgaaucggauucggaaA.....                                                                   | 1   | 1 | S04 |
| .....ggaucgaaucggauucggauU.....                                                                   | 4   | 1 | S04 |
| .....ggaucgaaucggauucggauaa.....                                                                  | 11  | 0 | S04 |
| .....ggaucgaaucggauucggauaG.....                                                                  | 1   | 1 | S04 |
| .....ggaucgaaucggauucggauaU.....                                                                  | 1   | 1 | S04 |
| .....ggaucgaaucggauucggauaaa.....                                                                 | 1   | 0 | S04 |
| .....gaucgaaucggauucggaa.....                                                                     | 1   | 0 | S04 |
| .....gaucgaaucggauucggauG.....                                                                    | 2   | 1 | S04 |
| .....gaucgaaucggauucggaua.....                                                                    | 4   | 0 | S04 |
| .....aucggauucUgaaaaagucuc.....                                                                   | 1   | 1 | S04 |
| .....uccggauucggauaaaaagucu.....                                                                  | 5   | 0 | S04 |
| .....uccggauucggauaaaaagucuca.....                                                                | 1   | 0 | S04 |
| .....cggauucggauaaaaagucu.....                                                                    | 5   | 0 | S04 |
| .....cggauucggauaaaaagucu.....                                                                    | 1   | 0 | S04 |
| .....cggauucggauaaaaagucuca.....                                                                  | 1   | 0 | S04 |
| .....cggauucggauaaaaagucucagg.....                                                                | 3   | 0 | S04 |
| .....cggauucggauaaaaagucucaAg.....                                                                | 1   | 1 | S04 |
| .....cggauucggauaaaaagucucagU.....                                                                | 1   | 1 | S04 |
| .....ggauucggauaaaaagucucagg.....                                                                 | 1   | 0 | S04 |
| .....ggauucggauaaaaagucucaggc.....                                                                | 2   | 0 | S04 |
| .....gaucucggauaaaaagucu.....                                                                     | 1   | 0 | S04 |

Star

Mature

|                                                                                                               |   |   |     |
|---------------------------------------------------------------------------------------------------------------|---|---|-----|
| ggauccaacauuuuuuuuauucggauccgaaucggccucuccggauuccggauuuucggauucgaaucggauucggauaaagucucaggccuagguggaagagcaaagu |   |   |     |
| .....aucucggauaaaagucucaggccu.....                                                                            | 3 | 0 | S04 |
| .....ucucggauaaaagucucaggccuG.....                                                                            | 1 | 1 | S04 |
| .....cucggauaaaagucucaAgcc.....                                                                               | 1 | 1 | S04 |
| .....cucggauaaaagucucaggcGu.....                                                                              | 1 | 1 | S04 |

Provisional ID : chrCnn\_random\_3169435  
 Score total : 0  
 Score for star read(s) : 3.9  
 Score for read counts : -3.9  
 Score for mfe : 0  
 Score for randfold : 0  
 Score for cons. seed :  
 Total read count : 4  
 Mature read count : 2  
 Loop read count : 0  
 Star read count : 2

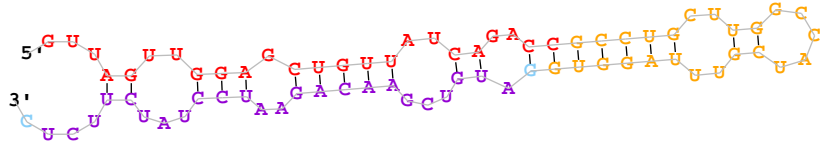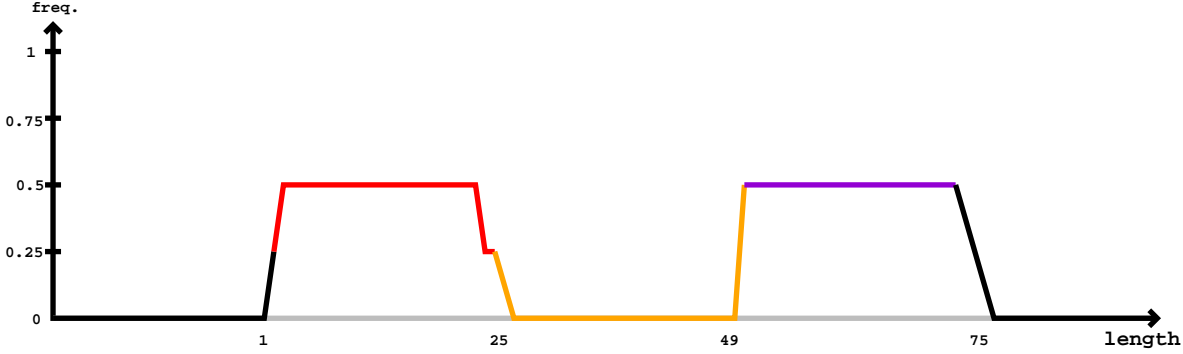

**Mature**

**Star**

|                                                                                               |                           |                          |                               |                   |       |     |        |  |
|-----------------------------------------------------------------------------------------------|---------------------------|--------------------------|-------------------------------|-------------------|-------|-----|--------|--|
| 5' - guuuguaggagaucaaaaga                                                                     | guuaguuggagcuguuauacagacc | gccugcuuggccaucguuuaggug | augucgaacagaauc <u>cuucuc</u> | cuccagauuuucugagu | -3'   | obs |        |  |
| guuuguaggagaucaaaaga                                                                          | guuaguuggagcuguuauacagacc | gccugcuuggccaucguuuaggug | augucgaacagaauc <u>cuucuc</u> | cuccagauuuucugagu |       | exp |        |  |
| .....(((((((((((.....((((((.....(((.....((((((.....(((.....)))))))))))))).....)))))))).....)) |                           |                          |                               |                   | reads | mm  | sample |  |
| .....guuaguuggagcuguuauacagacc.....                                                           |                           |                          |                               |                   | 1     | 0   | S03    |  |
| .....auucggaacagaauc <u>cuucuc</u> .....                                                      |                           |                          |                               |                   | 1     | 0   | S03    |  |
| .....uuaguuggagcuguuauacaga.....                                                              |                           |                          |                               |                   | 1     | 0   | S04    |  |
| .....augucgaacagaauc <u>cuucuc</u> G.....                                                     |                           |                          |                               |                   | 1     | 1   | S04    |  |

Provisional ID : chrCnn\_random\_3177496  
 Score total : 0.4  
 Score for star read(s) : 3.9  
 Score for read counts : -4.9  
 Score for mfe : 1.5  
 Score for randfold : 0  
 Score for cons. seed :  
 Total read count : 2  
 Mature read count : 1  
 Loop read count : 0  
 Star read count : 1

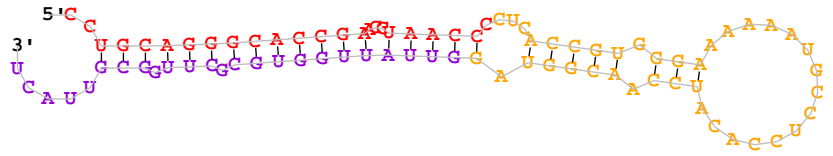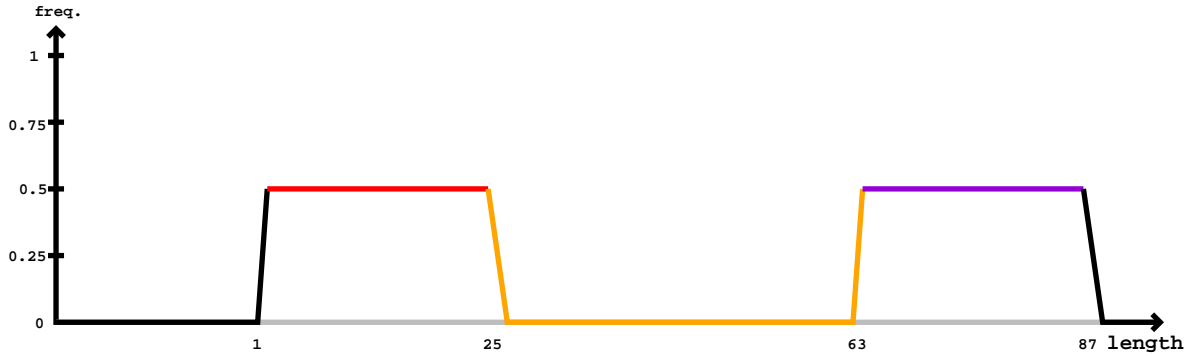

**Mature**

**Star**

|                                                                                                                                                                                                                                                                                                                                                                                                                                                                         |                                                         |
|-------------------------------------------------------------------------------------------------------------------------------------------------------------------------------------------------------------------------------------------------------------------------------------------------------------------------------------------------------------------------------------------------------------------------------------------------------------------------|---------------------------------------------------------|
| 5' - cucaaaaccagcucacagc <b>ccugcagggcaccgaaccuaacc</b> cuaccgugggaaaaauggcuccacauccaacgguag <u>guuuauuggugcgcuuggcguuacu</u> ugugagu<br>cucaaaaccagcucacagc <b>ccugcagggcaccgaaccuaacc</b> cuaccgugggaaaaauggcuccacauccaacgguag <u>guuuauuggugcgcuuggcguuacu</u> ugugagu<br>.....((((((((.....((((((((((((.....((((.....((((.....))))))))))))))))))))))))))))))))))))))<br>..... <b>ccugcagggcaccgaaccuaaccU</b> .....<br>..... <u>guuuauuggugUgcuuggcguuacu</u> ..... | -3' obs<br>exp<br>reads mm sample<br>1 1 S04<br>1 1 S04 |
|-------------------------------------------------------------------------------------------------------------------------------------------------------------------------------------------------------------------------------------------------------------------------------------------------------------------------------------------------------------------------------------------------------------------------------------------------------------------------|---------------------------------------------------------|



```

Provisional ID : chrCnn_random_3184158
Score total : 0.6
Score for star read(s) : -1.3
Score for read counts : 0
Score for mfe : 1.9
Score for randfold : 0
Score for cons. seed :
Total read count : 153
Mature read count : 57
Loop read count : 0
Star read count : 96

```

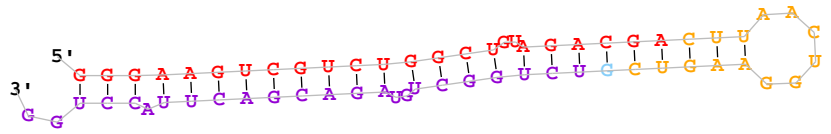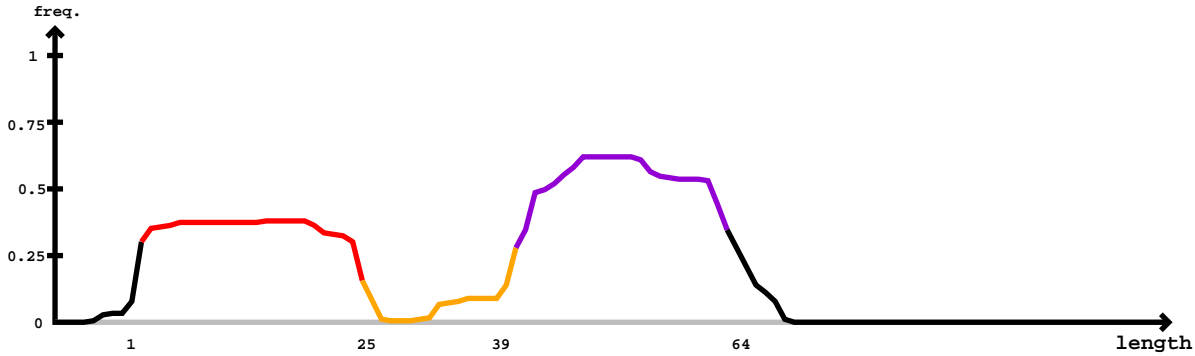

**Mature**

**Star**

| 5'                                                                                                                 | reads | mm | sample | -3' | obs exp |
|--------------------------------------------------------------------------------------------------------------------|-------|----|--------|-----|---------|
| cuuacuugggaagucgucuggcuguagacgacuuuaacuggaagucgucuggcuguagacgacuuaccuggaagucgcuagguccaacgcaaagguuuuuuugcaauugacuug | 1     | 1  | S03    |     |         |
| cuuacuugggaagucgucuggcuguagacgacuuuaacuggaagucgucuggcuguagacgacuuaccuggaagucgcuagguccaacgcaaagguuuuuuugcaauugacuug | 1     | 1  | S03    |     |         |
| ....(((((.....)))))).....(((((.....)))))).....                                                                     |       |    |        |     |         |
| .uacuugggaagucgucuggcugG.....                                                                                      | 1     | 0  | S03    |     |         |
| .acuCGgaagucgucuggcugu.....                                                                                        | 1     | 0  | S03    |     |         |
| .acuugggaagucgucuggcugua.....                                                                                      | 1     | 1  | S03    |     |         |
| .cuugggaagucgucuggcugua.....                                                                                       | 1     | 1  | S03    |     |         |
| .ugggaagucgucuggUuguaagacg.....                                                                                    | 1     | 0  | S03    |     |         |
| .ugggaagucgucuggcuguagacC.....                                                                                     | 2     | 0  | S03    |     |         |
| .ugggaagucgucuggcuguagacg.....                                                                                     | 1     | 1  | S03    |     |         |
| .gggaagucgucuggcuguU.....                                                                                          | 1     | 0  | S03    |     |         |
| .gggaagucgucuggcugu.....                                                                                           | 1     | 1  | S03    |     |         |
| .gggaagucgucuggcuguagGc.....                                                                                       | 1     | 0  | S03    |     |         |
| .gggaagucgucuggcuguagac.....                                                                                       | 5     | 0  | S03    |     |         |
| .gggaagucgucuggcuguagacg.....                                                                                      | 4     | 1  | S03    |     |         |
| .gggaagucgucuggcuguagacgU.....                                                                                     | 10    | 0  | S03    |     |         |
| .gggaagucgucuggcuguagacgA.....                                                                                     | 1     | 1  | S03    |     |         |
| .ggaagucgucuggcuguagacg.....                                                                                       | 6     | 0  | S03    |     |         |
| .ggaagucgucuggcuguagacgU.....                                                                                      | 2     | 1  | S03    |     |         |
| .ggaagucgucuggcuguagacgAA.....                                                                                     | 2     | 1  | S03    |     |         |
| .gaagucgucuggcugCagacg.....                                                                                        | 2     | 1  | S03    |     |         |
| .aagucgucuggcuguagacgU.....                                                                                        | 2     | 0  | S03    |     |         |
| .agucgucuggcuguagacg.....                                                                                          | 2     | 1  | S03    |     |         |
| .uggaagucgucuggcugAagac.....                                                                                       | 1     | 1  | S03    |     |         |
| .ggaagucgucuggcuguagacg.....                                                                                       | 6     | 0  | S03    |     |         |
| .ggaagucgucuggcuguagacgU.....                                                                                      | 2     | 1  | S03    |     |         |
| .ggaagucgucuggcuguagacgAA.....                                                                                     | 2     | 1  | S03    |     |         |
| .gaagucgucuggcugCagacg.....                                                                                        | 2     | 1  | S03    |     |         |
| .aagucgucuggcuguagacgU.....                                                                                        | 2     | 0  | S03    |     |         |
| .agucgucuggcuguagacg.....                                                                                          | 2     | 1  | S03    |     |         |
| .cguCCggcuguagacgacuacc.....                                                                                       | 1     | 1  | S03    |     |         |
| .gucCggcuguagacgacuacc.....                                                                                        | 4     | 1  | S03    |     |         |
| .gucuggcuguagacgacuaccG.....                                                                                       | 1     | 1  | S03    |     |         |
| .gucCggcuguagacgacuaccu.....                                                                                       | 1     | 1  | S03    |     |         |
| .gucCggcuguagacgacuaccg.....                                                                                       | 2     | 1  | S03    |     |         |

Mature

Star

|                                                                                                                     |   |   |     |
|---------------------------------------------------------------------------------------------------------------------|---|---|-----|
| cuuacuugggaagucgucuggcuguagacgacuuuacuggaagucgucuggcuguagacgacuuaccuggaagucgcuuaggucaacgcaagguuuuuuugcaauugacuuiuug |   |   |     |
| .....ucCggcuguagacgacuuacc.....                                                                                     | 2 | 1 | S03 |
| .....ucCggcuguagacgacuuaccu.....                                                                                    | 2 | 1 | S03 |
| .....ucuggcuguagacgacuuaccA.....                                                                                    | 1 | 1 | S03 |
| .....ucCggcuguagacgacuuaccug.....                                                                                   | 4 | 1 | S03 |
| .....ucuggcuguagacgacuuaccug.....                                                                                   | 1 | 0 | S03 |
| .....ucuggcuguagacgacuuaccuC.....                                                                                   | 1 | 1 | S03 |
| .....ucuggcuguagacgacuuaccugg.....                                                                                  | 2 | 0 | S03 |
| .....ucCggcuguagacgacuuaccugg.....                                                                                  | 4 | 1 | S03 |
| .....ucCggcuguagacgacuuaccugga.....                                                                                 | 1 | 1 | S03 |
| .....cuggcuguagacgacuuacc.....                                                                                      | 1 | 0 | S03 |
| .....cuggcuguagacgacuuacc.....                                                                                      | 1 | 0 | S03 |
| .....cCggcuguagacgacuuaccu.....                                                                                     | 2 | 1 | S03 |
| .....cCggcuguagacgacuuaccug.....                                                                                    | 4 | 1 | S03 |
| .....cuggcuguagacgacuuaccugg.....                                                                                   | 1 | 0 | S03 |
| .....cCggcuguagacgacuuaccugga.....                                                                                  | 1 | 1 | S03 |
| .....cuggcuguagacgacuuaccuggC.....                                                                                  | 1 | 1 | S03 |
| .....Cggcuguagacgacuuacc.....                                                                                       | 1 | 1 | S03 |
| .....uggcuguagGcgacuuacc.....                                                                                       | 1 | 1 | S03 |
| .....uggcuguagacgacuuacc.....                                                                                       | 3 | 0 | S03 |
| .....uggcuguagacgacuuaccG.....                                                                                      | 1 | 1 | S03 |
| .....uggcuguagacgacuuaccu.....                                                                                      | 2 | 0 | S03 |
| .....Cggcuguagacgacuuaccu.....                                                                                      | 1 | 1 | S03 |
| .....uggcuguagacgacuuaccug.....                                                                                     | 1 | 0 | S03 |
| .....Cggcuguagacgacuuaccug.....                                                                                     | 4 | 1 | S03 |
| .....Cggcuguagacgacuuaccugg.....                                                                                    | 3 | 1 | S03 |
| .....Cggcuguagacgacuuaccugga.....                                                                                   | 1 | 1 | S03 |
| .....Cggcuguagacgacuuaccuggaa.....                                                                                  | 2 | 1 | S03 |
| .....uggcuguagacgacuuaccuggaa.....                                                                                  | 1 | 0 | S03 |
| .....ggcuguagacgacuuaccu.....                                                                                       | 1 | 0 | S03 |
| .....ggcuguagacgacuuaccuggaagC.....                                                                                 | 1 | 1 | S03 |
| .....gUguagacgacuuaccuggaagu.....                                                                                   | 1 | 1 | S03 |
| .....gcuguagacgacuuaccuggaagu.....                                                                                  | 2 | 0 | S03 |
| .....cuguagacgacuuaccugga.....                                                                                      | 1 | 0 | S03 |
| .....cuguagacgacuuaccuggaag.....                                                                                    | 3 | 0 | S03 |
| .....cuguagacgacuuaccuggaaU.....                                                                                    | 1 | 1 | S03 |
| .....cuguagacgacuuaccuggaaUu.....                                                                                   | 1 | 1 | S03 |
| .....uguagacgacuuaccugga.....                                                                                       | 1 | 0 | S03 |
| .....uguagacgacuuaccuggaag.....                                                                                     | 1 | 0 | S03 |
| .....uguagacgacuuaccuggaaU.....                                                                                     | 1 | 1 | S03 |
| .....uguagacgacuuaccuggaagu.....                                                                                    | 1 | 0 | S03 |
| .....uguagacgacuuaccuggaaguA.....                                                                                   | 1 | 1 | S03 |
| .....guagacgacuuaccugga.....                                                                                        | 1 | 0 | S03 |
| .....gGagacgacuuaccuggaagu.....                                                                                     | 1 | 1 | S03 |
| .....guagacgacuuaccuggaagu.....                                                                                     | 3 | 0 | S03 |
| .....guagacgacuuaccuggaaguA.....                                                                                    | 1 | 1 | S03 |
| .....acuuggUaagucgucuggcugu.....                                                                                    | 1 | 1 | S04 |
| .....acuugggaagucgucuggcuguaA.....                                                                                  | 1 | 1 | S04 |
| .....ugggaagucgucuggcuguagac.....                                                                                   | 1 | 0 | S04 |
| .....ugggaagucgucuggcuguagacg.....                                                                                  | 3 | 0 | S04 |
| .....gggaagucgucuggcugua.....                                                                                       | 1 | 0 | S04 |
| .....gggaagucgucuggcuguaga.....                                                                                     | 1 | 0 | S04 |
| .....gggaagucgucuggcuguagacg.....                                                                                   | 7 | 0 | S04 |
| .....gggaagucgucuggcuguagacgG.....                                                                                  | 1 | 1 | S04 |
| .....gggaagucgucuggcuguagacgU.....                                                                                  | 2 | 1 | S04 |
| .....gggaagucgucuggcuguagacga.....                                                                                  | 3 | 0 | S04 |
| .....gggaaguUgucuggcuguagacga.....                                                                                  | 1 | 1 | S04 |
| .....ggaagucgucuggcuguagac.....                                                                                     | 2 | 0 | S04 |
| .....ggaagucgucuggcuguagacU.....                                                                                    | 2 | 1 | S04 |
| .....ggaagucgucuggcuguagacg.....                                                                                    | 2 | 0 | S04 |
| .....ggaagucgucuggcuguagacgG.....                                                                                   | 2 | 1 | S04 |
| .....aguGgucuggcuguagacgacu.....                                                                                    | 2 | 1 | S04 |
| .....gcuguagacgacuuaccuggaagu.....                                                                                  | 1 | 0 | S04 |
| .....cuggaagucgucuggcuguagacg.....                                                                                  | 1 | 0 | S04 |
| .....ggaagucgucuggcuguagac.....                                                                                     | 2 | 0 | S04 |
| .....ggaagucgucuggcuguagacg.....                                                                                    | 2 | 0 | S04 |
| .....ggaagucgucuggcuguagacU.....                                                                                    | 2 | 1 | S04 |
| .....ggaagucgucuggcuguagacgG.....                                                                                   | 2 | 1 | S04 |
| .....aguGgucuggcuguagacgacu.....                                                                                    | 2 | 1 | S04 |
| .....gucuggcuguagacgacuuaccA.....                                                                                   | 1 | 1 | S04 |

**Mature**

**Star**

|                                                                                                                  |   |   |     |
|------------------------------------------------------------------------------------------------------------------|---|---|-----|
| cuuacuugggaagucgucuggcuguagacgacuuuacuggaagucgucuggcuguagacgacuuaccuggaagucgcuugguacacgcaaggguuuuuugcaauugacuuug |   |   |     |
| .....ucuggcuguagacgacuuacc.....                                                                                  | 3 | 0 | S04 |
| .....ucuggcuguagacgacuuacc.....                                                                                  | 1 | 0 | S04 |
| .....ucuggcuguagacgacuuaccG.....                                                                                 | 1 | 1 | S04 |
| .....ucuggcuguagacgacuuaccugg.....                                                                               | 2 | 0 | S04 |
| .....cCggcuguagacgacuuaccu.....                                                                                  | 1 | 1 | S04 |
| .....uggcuguagacgacuuaccu.....                                                                                   | 1 | 0 | S04 |
| .....uggcuguagacgacuuaccuggU.....                                                                                | 1 | 1 | S04 |
| .....uggcuguagacgacuuaccuggaa.....                                                                               | 2 | 0 | S04 |
| .....gUguagacgacuuaccuggaagu.....                                                                                | 1 | 1 | S04 |
| .....guagacgacuuaccuggaagu.....                                                                                  | 1 | 0 | S04 |



Star

Mature

|                                                                                                                |    |   |     |
|----------------------------------------------------------------------------------------------------------------|----|---|-----|
| ucuaauuauaaaaacacacaaaauacauauccaaaauuuauaccacuuuaggcagaagacuucggaagacuuccugaagacuucgugcgaaagucuuucagcauaaaaau |    |   |     |
| .....acuucgugcgaaUucuucuagca.....                                                                              | 2  | 1 | S03 |
| .....acuucgugcgaaUucuucuagcau.....                                                                             | 3  | 1 | S03 |
| .....cuucgugcgaaUucuucuagc.....                                                                                | 2  | 1 | S03 |
| .....cuucgugcgaaUucuucuagca.....                                                                               | 2  | 1 | S03 |
| .....cuucgugcgaaUucuucuagcau.....                                                                              | 1  | 1 | S03 |
| .....cuucgugcgaaCucuucuagcaua.....                                                                             | 1  | 1 | S03 |
| .....cuucgugcgaaUucuucuagcaua.....                                                                             | 25 | 1 | S03 |
| .....uucgugcgaaUucuucuagc.....                                                                                 | 2  | 1 | S03 |
| .....uucgugcgaaUucuucuagcau.....                                                                               | 2  | 1 | S03 |
| .....uucgugcgaaUucuucuagcaua.....                                                                              | 11 | 1 | S03 |
| .....cgaaUucuucuagcauaaaaau                                                                                    | 2  | 1 | S03 |
| .....uauaccacuuuaggcagaagacA.....                                                                              | 1  | 1 | S04 |
| .....auaccacuuuaggcagaagacuuc.....                                                                             | 1  | 0 | S04 |
| .....aagacuuccugaagacuucgug.....                                                                               | 2  | 0 | S04 |
| .....aagacuuccGaaagacuucgugc.....                                                                              | 2  | 1 | S04 |
| .....aagacuuccGaaagacuucgugcg.....                                                                             | 1  | 1 | S04 |
| .....agacuuccGaaagacuucgugc.....                                                                               | 1  | 1 | S04 |
| .....agacuuccGaaagacuucgugcga.....                                                                             | 1  | 1 | S04 |
| .....uuccugaagacuucgugc.....                                                                                   | 1  | 0 | S04 |
| .....agacuucgugcgaaUucuuc.....                                                                                 | 1  | 1 | S04 |
| .....agacuucgugcgaaUucuuc.....                                                                                 | 5  | 1 | S04 |
| .....agacuucgugcgaaUucuucuagc.....                                                                             | 14 | 1 | S04 |
| .....acuucgugcgaaUucuucua.....                                                                                 | 2  | 1 | S04 |
| .....cuucgugcgaaUucuucuagca.....                                                                               | 1  | 1 | S04 |
| .....cuucgugcgaaUucuucuagcaua.....                                                                             | 4  | 1 | S04 |
| .....uucgugcgaaUucuucuagc.....                                                                                 | 1  | 1 | S04 |



Star

Mature

cacgcgguuugguuuucccgguaaauggcaauccgacggaauuggugucgucuuauauuccgacggaauacugacgauuuuccgacggaauuccgacgacuauagug

|                                   |   |   |     |
|-----------------------------------|---|---|-----|
| .....uuuccgacggaauccgac.....      | 1 | 0 | S04 |
| .....uuuccgacggaauccgacgaAu.....  | 1 | 1 | S04 |
| .....uuuccgacggaauccgac.....      | 2 | 0 | S04 |
| .....uuuccgacggaauccgacgac.....   | 1 | 0 | S04 |
| .....uuuccgacggaauccgacgacu.....  | 1 | 0 | S04 |
| .....uuuccgacggaauccgacgacu.....  | 1 | 1 | S04 |
| .....uuuccgacggaauccgacgacu.....  | 5 | 0 | S04 |
| .....uuccgacggaauccgac.....       | 3 | 0 | S04 |
| .....uuccgacggaauccgacg.....      | 1 | 0 | S04 |
| .....uuccgacggaauccgacgaU.....    | 1 | 1 | S04 |
| .....uuccgacggaauccgacgacu.....   | 2 | 0 | S04 |
| .....uuccgacggaauccgacgacG.....   | 1 | 1 | S04 |
| .....uuccgacggaauccgacgCcu.....   | 1 | 1 | S04 |
| .....uuccgacggaauccgacgacu.....   | 1 | 0 | S04 |
| .....uccgacggaauccgacg.....       | 1 | 0 | S04 |
| .....ccgacggaauccgacga.....       | 1 | 0 | S04 |
| .....ccgacggaauccgacgacu.....     | 5 | 0 | S04 |
| .....ccgacggaauccgacgCcu.....     | 1 | 1 | S04 |
| .....ccgacggaauccgacgacuCu.....   | 2 | 1 | S04 |
| .....ccgacggaauccgacgacuagu.....  | 2 | 0 | S04 |
| .....ccgacggaauccgacgacuCgu.....  | 1 | 1 | S04 |
| .....ccgacggaauccgacgacuUgu.....  | 2 | 1 | S04 |
| .....Agacggaauccgacgac.....       | 1 | 1 | S04 |
| .....cgacggaauccgacgacu.....      | 1 | 0 | S04 |
| .....cgacggaauccgacgCcu.....      | 3 | 1 | S04 |
| .....cgacggaauccgacgacu.....      | 1 | 0 | S04 |
| .....cgacggaauccgacgacuCu.....    | 1 | 1 | S04 |
| .....cgacggaauccgacgacuaguC.....  | 1 | 1 | S04 |
| .....gacggaauccgacgacu.....       | 5 | 0 | S04 |
| .....gacggaauccgacgaAgacu.....    | 1 | 1 | S04 |
| .....gacggaauccgacgacuua.....     | 1 | 0 | S04 |
| .....gacggaauccgacgacuagu.....    | 2 | 0 | S04 |
| .....gacggaauccgacgacuaguA.....   | 1 | 1 | S04 |
| .....gacggaauccgacgacuauagug..... | 1 | 0 | S04 |

Provisional ID : chrCnn\_random\_3206172  
 Score total : 0.4  
 Score for star read(s) : 3.9  
 Score for read counts : -4.9  
 Score for mfe : 1.4  
 Score for randfold : 0  
 Score for cons. seed :  
 Total read count : 2  
 Mature read count : 1  
 Loop read count : 0  
 Star read count : 1

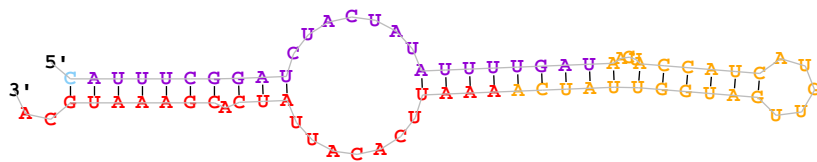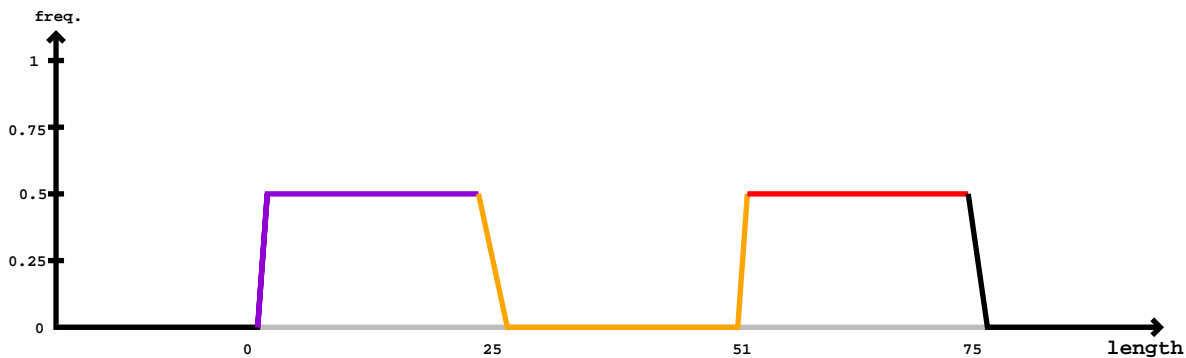

**Star**

**Mature**

|                                                                                                         |              |         |          |        |         |           |        |         |        |            |       |     |        |
|---------------------------------------------------------------------------------------------------------|--------------|---------|----------|--------|---------|-----------|--------|---------|--------|------------|-------|-----|--------|
| 5' - gaauuucuagagugguugc                                                                                | auuucggaucua | uuuuuga | aaacuacc | caugug | uuuauca | aaaauucac | uuuacg | aaaugca | uuucac | uuuuugacau | -3'   | obs |        |
| gaauuucuagagugguugc                                                                                     | auuucggaucua | uuuuuga | aaacuacc | caugug | uuuauca | aaaauucac | uuuacg | aaaugca | uuucac | uuuuugacau | exp   |     |        |
| .....(((((((.....(((((((.....(((((((.....(((((((.....)))))))))))))))))))))))).....))))))))))))))))..... |              |         |          |        |         |           |        |         |        |            | reads | mm  | sample |
| .....auuucggaucua                                                                                       |              |         |          |        |         |           |        |         |        |            | 1     | 1   | S03    |
| .....aaaCucacauuacg                                                                                     |              |         |          |        |         |           |        |         |        |            | 1     | 1   | S04    |



Provisional ID : chrCnn\_random\_3214096  
 Score total : 29.8  
 Score for star read(s) : 3.9  
 Score for read counts : 30.7  
 Score for mfe : -4.7  
 Score for randfold : 0  
 Score for cons. seed :  
 Total read count : 72  
 Mature read count : 71  
 Loop read count : 0  
 Star read count : 1

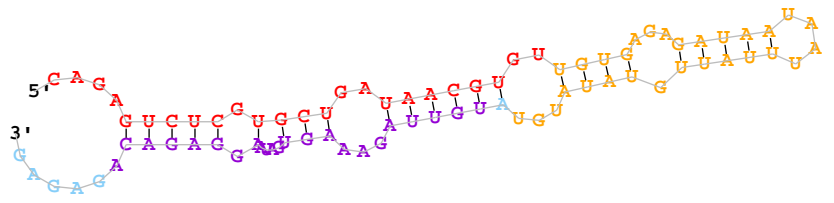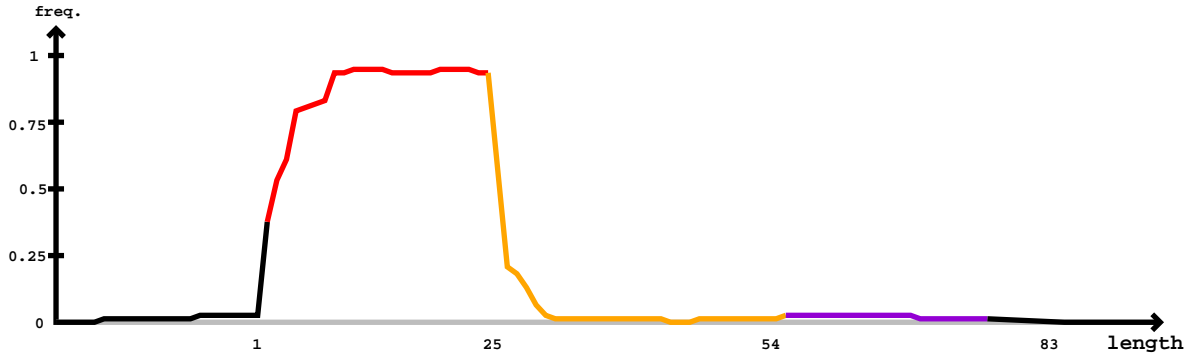

**Mature**

**Star**

| 5' -                                                                                                          | obs   | mm  | sample |
|---------------------------------------------------------------------------------------------------------------|-------|-----|--------|
| auugauaagccucaauuggccagagucucgugcugauaacgugugugagagauaauuuuuuuguaauuguauguuagaaagugauaaggagacagagaggaagaguugg | -3'   | exp |        |
| .....(((.....))).....(((((((.....((((.....((((.....)))))).....)))))).....)))).....)))).....)))).....          | reads |     |        |
| .....cagagucucgugcugauaacgugu.....                                                                            | 10    | 0   | S03    |
| .....cagagucucgugcugauaacgugu.....                                                                            | 1     | 1   | S03    |
| .....agagucucgugcugauaacgu.....                                                                               | 1     | 0   | S03    |
| .....agagucucgugcugauaacgugu.....                                                                             | 1     | 0   | S03    |
| .....agagucucgugcugauaacguguu.....                                                                            | 1     | 0   | S03    |
| .....agagucucgugcugauaacguguC.....                                                                            | 1     | 1   | S03    |
| .....agagucucguAACugauaacguguu.....                                                                           | 1     | 1   | S03    |
| .....Uagucucgugcugauaacgugu.....                                                                              | 1     | 1   | S03    |
| .....agucucgugcugauaacgugA.....                                                                               | 1     | 1   | S03    |
| .....agucucgugcugauaacgugu.....                                                                               | 7     | 0   | S03    |
| .....agucucgugcugauaacgugC.....                                                                               | 1     | 1   | S03    |
| .....agucucgugcugauaacgugG.....                                                                               | 1     | 1   | S03    |
| .....agucucgugcugauaacgGgu.....                                                                               | 1     | 1   | S03    |
| .....agucucgugcugauaacguguug.....                                                                             | 1     | 0   | S03    |
| .....agucucgugcugauaacguguugu.....                                                                            | 1     | 0   | S03    |
| .....ucucgugcugaAACguguugu.....                                                                               | 1     | 1   | S03    |
| .....ucgugcugauaacguguugu.....                                                                                | 1     | 0   | S03    |
| .....ucgugcugauaacguguuguug.....                                                                              | 2     | 0   | S03    |
| .....ucgugcugauaacguguuguga.....                                                                              | 1     | 0   | S03    |
| .....gauaagccucaauuggccagagu.....                                                                             | 1     | 0   | S04    |
| .....aauggccagagucucgugc.....                                                                                 | 1     | 0   | S04    |
| .....cagagucucgugcugauaacgugC.....                                                                            | 2     | 1   | S04    |
| .....cagagucucgugcugauaacgugu.....                                                                            | 14    | 0   | S04    |
| .....agagucucgugcugauaacgugC.....                                                                             | 1     | 1   | S04    |
| .....agagucucgugcugauaacgugu.....                                                                             | 5     | 0   | S04    |
| .....Ggagucucgugcugauaacgugu.....                                                                             | 1     | 1   | S04    |
| .....gagucucgugcugauaacgugA.....                                                                              | 1     | 1   | S04    |
| .....gagucucgugcugauaacgugu.....                                                                              | 1     | 0   | S04    |
| .....gagucucguAACugauaacguguu.....                                                                            | 2     | 1   | S04    |
| .....gagucucgugcugauaacguguu.....                                                                             | 1     | 0   | S04    |
| .....agucucgugcugauaacguguug.....                                                                             | 1     | 0   | S04    |
| .....gucucgugcugauaacgugu.....                                                                                | 1     | 0   | S04    |

**Mature**

**Star**

|                                                                                                               |   |   |     |
|---------------------------------------------------------------------------------------------------------------|---|---|-----|
| auugauaagccucaaauugccagagucucgugcugauaacguguugugagagauaauuuuuuuuguauguauguuagaaagugauaaggagacagagaggaagaguugg |   |   |     |
| .....cucgugcugauaacguguugug.....                                                                              | 1 | 0 | S04 |
| .....cucgugcugauaacguguugag.....                                                                              | 1 | 0 | S04 |
| .....ucgugcugauaacguguugug.....                                                                               | 2 | 0 | S04 |
| .....ucgugcugauaacguguuguga.....                                                                              | 2 | 0 | S04 |
| .....gugcugauaacguguugu.....                                                                                  | 1 | 0 | S04 |
| .....acguguugugagagauaauuu.....                                                                               | 1 | 0 | S04 |
| .....guauauguauguuagaaagugau.....                                                                             | 1 | 0 | S04 |
| .....uUuuagaaagugauaaggagaca.....                                                                             | 1 | 1 | S04 |



Provisional ID : chrCnn\_random\_3223065  
 Score total : 0.3  
 Score for star read(s) : -1.3  
 Score for read counts : 0  
 Score for mfe : 1.6  
 Score for randfold : 0  
 Score for cons. seed :  
 Total read count : 39  
 Mature read count : 37  
 Loop read count : 0  
 Star read count : 2

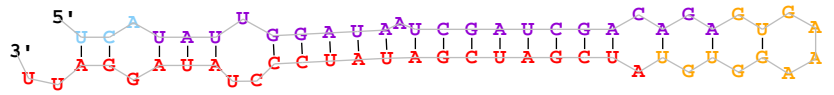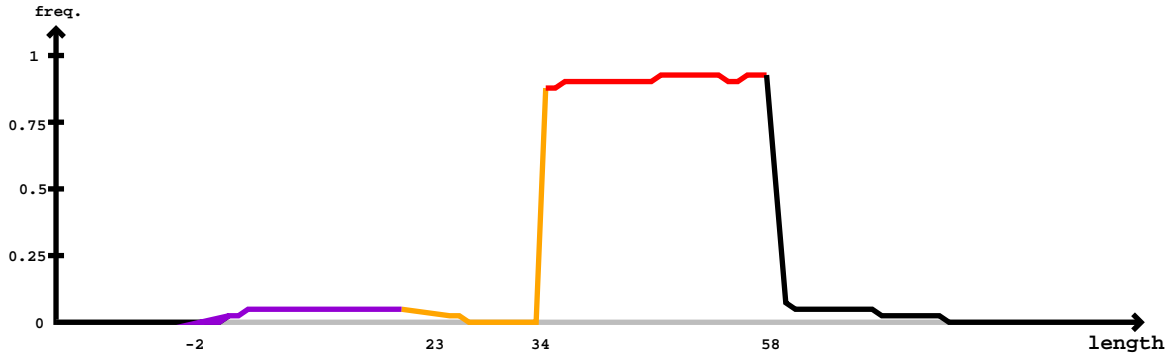

Star
Mature

| 5' -                                                                      | -3'                                    | obs | exp | reads | mm | sample |
|---------------------------------------------------------------------------|----------------------------------------|-----|-----|-------|----|--------|
| ugucgaccgauauucauauuggauaaucgaucgacagagugaaagguguaucgaucgauaucccuauaggauu | aucgaucgacacuguuauugaucgaacaaaauuguuug | 1   | 0   | 1     | 0  | S03    |
| ugucgaccgauauucauauuggauaaucgaucgacagagugaaagguguaucgaucgauaucccuauaggauu | aucgaucgacacuguuauugaucgaacaaaauuguuug | 1   | 0   | 1     | 0  | S03    |
| .....uuggauaaucgaucgacagagug.....                                         | .....aucgaucgauaucccuaua.....          | 1   | 0   | 1     | 0  | S03    |
| .....aucgaucgauaucccuauaggau.....                                         | .....aucgaucgauaucccuauaggau.....      | 1   | 1   | 1     | 1  | S03    |
| .....aucgaucgauaucccuauaggauG.....                                        | .....aucgaucgauaucccuauaggauG.....     | 1   | 1   | 1     | 1  | S03    |
| .....aucgaucgauaucccuauaggau.....                                         | .....aucgaucgauaucccuauaggau.....      | 12  | 0   | 12    | 0  | S03    |
| .....aucgaucgauaucccuGuaggau.....                                         | .....aucgaucgauaucccuGuaggau.....      | 2   | 1   | 2     | 1  | S03    |
| .....cccuGuaggauuauucgaucgaca.....                                        | .....cccuGuaggauuauucgaucgaca.....     | 1   | 1   | 1     | 1  | S03    |
| .....auaucgaucgacacuguuau.....                                            | .....auaucgaucgacacuguuau.....         | 1   | 0   | 1     | 0  | S03    |
| .....uauuggauaaucgaucgacaga.....                                          | .....uauuggauaaucgaucgacaga.....       | 1   | 0   | 1     | 0  | S04    |
| .....aucgaucgauauccUuauaggau.....                                         | .....aucgaucgauauccUuauaggau.....      | 1   | 1   | 1     | 1  | S04    |
| .....aucgaucgauaucccuauaggauG.....                                        | .....aucgaucgauaucccuauaggauG.....     | 1   | 1   | 1     | 1  | S04    |
| .....aucgaucgauaucccuauaggau.....                                         | .....aucgaucgauaucccuauaggau.....      | 14  | 0   | 14    | 0  | S04    |
| .....aucgaucgauaucccuGuaggau.....                                         | .....aucgaucgauaucccuGuaggau.....      | 1   | 1   | 1     | 1  | S04    |
| .....aucgaucgauaucccuauaggauU.....                                        | .....aucgaucgauaucccuauaggauU.....     | 1   | 1   | 1     | 1  | S04    |
| .....cgaucgauGucccuauaggauau.....                                         | .....cgaucgauGucccuauaggauau.....      | 1   | 1   | 1     | 1  | S04    |















Star

Mature

gaguuuuuaaacccgaaagcaacgUUUUGcaguUUGaauaacacuUauuaaaccuuauaagugucuuagacugauuuugaagucaaaaauuuuuuccuuaccuuauauaaa

|                                                   |     |   |     |
|---------------------------------------------------|-----|---|-----|
| . . . . . uaagugucuuagacugauuuugaagucaa . . . . . | 1   | 0 | S03 |
| . . . . . aagugucuuagacugauu . . . . .            | 7   | 0 | S03 |
| . . . . . aagugucuuagacugauG . . . . .            | 1   | 1 | S03 |
| . . . . . aagugucuuagacugauuU . . . . .           | 1   | 1 | S03 |
| . . . . . aagugucuuagacugaAua . . . . .           | 2   | 1 | S03 |
| . . . . . aagugucuuagacugauua . . . . .           | 3   | 0 | S03 |
| . . . . . Gagugucuuagacugauuuu . . . . .          | 1   | 1 | S03 |
| . . . . . aagugucuuagacugauuuau . . . . .         | 4   | 0 | S03 |
| . . . . . aagugucuuagacugauGaug . . . . .         | 1   | 1 | S03 |
| . . . . . aagugucuuagacugauuuU . . . . .          | 1   | 1 | S03 |
| . . . . . aagugucuuagacugauuuug . . . . .         | 27  | 0 | S03 |
| . . . . . aagugAcuuagacugauuuuga . . . . .        | 1   | 1 | S03 |
| . . . . . aagugucuuagacugauuuugG . . . . .        | 3   | 1 | S03 |
| . . . . . aagugucuuagacugaAuauga . . . . .        | 3   | 1 | S03 |
| . . . . . aagugucuuagacugauuuuga . . . . .        | 40  | 0 | S03 |
| . . . . . aCgugucuuagacugauuuuga . . . . .        | 3   | 1 | S03 |
| . . . . . aagugucuuagacugauuuugC . . . . .        | 1   | 1 | S03 |
| . . . . . aagGgucuuagacugauuuuga . . . . .        | 1   | 1 | S03 |
| . . . . . aCgugucuuagacugauuuugaa . . . . .       | 2   | 1 | S03 |
| . . . . . aagugucuuagacugGuuuugaa . . . . .       | 1   | 1 | S03 |
| . . . . . aagugucuuagacugauuuuga . . . . .        | 12  | 0 | S03 |
| . . . . . aagugAcuuagacugauuuugaag . . . . .      | 1   | 1 | S03 |
| . . . . . Gagugucuuagacugauuuugaag . . . . .      | 1   | 1 | S03 |
| . . . . . aagGgucuuagacugauuuugaag . . . . .      | 1   | 1 | S03 |
| . . . . . Nagugucuuagacugauuuugaag . . . . .      | 1   | 1 | S03 |
| . . . . . aagugucuuagacugauuuCgaag . . . . .      | 1   | 1 | S03 |
| . . . . . aagugucGagacugauuuugaag . . . . .       | 1   | 1 | S03 |
| . . . . . aagugucuCagacugauuuugaag . . . . .      | 1   | 1 | S03 |
| . . . . . aagugucuuagacugauuuugaag . . . . .      | 235 | 0 | S03 |
| . . . . . aCgugucuuagacugauuuugaag . . . . .      | 26  | 1 | S03 |
| . . . . . aagugucuuagacugauuuugUag . . . . .      | 1   | 1 | S03 |
| . . . . . aagugucuuagacugauuuAgaag . . . . .      | 1   | 1 | S03 |
| . . . . . aagCgucuuagacugauuuugaag . . . . .      | 3   | 1 | S03 |
| . . . . . aagugucuuagGcugauuuugaag . . . . .      | 1   | 1 | S03 |
| . . . . . aagugucuuagaAugaauugaag . . . . .       | 1   | 1 | S03 |
| . . . . . aUgugucuuagacugauuuugaag . . . . .      | 5   | 1 | S03 |
| . . . . . aagugucuuagacugaAuaugaag . . . . .      | 21  | 1 | S03 |
| . . . . . aagugucuuagacugauuuugaGgu . . . . .     | 1   | 1 | S03 |
| . . . . . aagugucuuagacugauuuugaagu . . . . .     | 24  | 0 | S03 |
| . . . . . Cagugucuuagacugauuuugaagu . . . . .     | 1   | 1 | S03 |
| . . . . . aagugucuuagacugauuuugaagC . . . . .     | 2   | 1 | S03 |
| . . . . . aagugucuuagacugaAuaugaagu . . . . .     | 1   | 1 | S03 |
| . . . . . aCgugucuuagacugauuuugaagu . . . . .     | 3   | 1 | S03 |
| . . . . . aagugucuuagacugauuuugaagA . . . . .     | 4   | 1 | S03 |
| . . . . . aagugucuuagacugauuuugaagG . . . . .     | 1   | 1 | S03 |
| . . . . . aagugucuuagacugauuuugaaguc . . . . .    | 1   | 0 | S03 |
| . . . . . aagugucuuagacugauuuugaagCc . . . . .    | 1   | 1 | S03 |
| . . . . . aagugucuuagacugauuuugaaguca . . . . .   | 2   | 0 | S03 |
| . . . . . aagugucuuagacugauuuugaagucU . . . . .   | 2   | 1 | S03 |
| . . . . . aUgugucuuagacugauuuugaaguca . . . . .   | 2   | 1 | S03 |
| . . . . . aagugucuuagacugauuuugaagucaU . . . . .  | 1   | 1 | S03 |
| . . . . . aCgugucuuagacugauuuugaagucaa . . . . .  | 1   | 1 | S03 |
| . . . . . aagugucuuagacugaAuaugaagucaa . . . . .  | 1   | 1 | S03 |
| . . . . . aagugucuuagacugauuuugaagucaa . . . . .  | 1   | 0 | S03 |
| . . . . . aagugucuuagacugauuuugaagucaaa . . . . . | 1   | 0 | S03 |
| . . . . . aagugucuuagacugauuuugaagucCaa . . . . . | 1   | 1 | S03 |
| . . . . . agugucuuagacugauua . . . . .            | 2   | 0 | S03 |
| . . . . . agugucuuagacugauuuu . . . . .           | 1   | 0 | S03 |
| . . . . . agugucuuagacugauuuug . . . . .          | 3   | 0 | S03 |
| . . . . . agugucuuagacCgauuuuga . . . . .         | 1   | 1 | S03 |
| . . . . . agCgucuuagacugauuuuga . . . . .         | 1   | 1 | S03 |
| . . . . . agugucuuagacugauuuugG . . . . .         | 1   | 1 | S03 |
| . . . . . agugucuuagacugauuuuga . . . . .         | 29  | 0 | S03 |
| . . . . . agugucuuagacugauuuugaa . . . . .        | 1   | 0 | S03 |
| . . . . . agugucuCagacugauuuugaag . . . . .       | 1   | 1 | S03 |
| . . . . . agugucuuagacugauuuugaag . . . . .       | 14  | 0 | S03 |
| . . . . . agugucuuagacugaAuaugaag . . . . .       | 2   | 1 | S03 |
| . . . . . agugucuuagacugauuuugGag . . . . .       | 1   | 1 | S03 |
| . . . . . agGgucuuagacugauuuugaag . . . . .       | 1   | 1 | S03 |
| . . . . . agugucuuagGcugauuuugaagu . . . . .      | 5   | 1 | S03 |

Star

Mature

gaguuuuaaacgaaagcaacgUUUGcaguUGaauaacacuuauauuaaaccuuauuaagugucuuagacugauuuugaagucaaaaauuuguccuuaccuuauauuaaa

|                                        |     |   |     |
|----------------------------------------|-----|---|-----|
| .....agugucuuagacugauuuugaagA.....     | 6   | 1 | S03 |
| .....agugucuuagacCgauuuugaagu.....     | 2   | 1 | S03 |
| .....aguUucuuagacugauuuugaagu.....     | 5   | 1 | S03 |
| .....agugucuuagacugauuuugaagG.....     | 29  | 1 | S03 |
| .....agugucAuaagacugauuuugaagu.....    | 1   | 1 | S03 |
| .....agCgucuuagacugauuuugaagu.....     | 2   | 1 | S03 |
| .....agugucuuagCcgauuuugaagu.....      | 1   | 1 | S03 |
| .....agugucuuagacugauuuugaCgu.....     | 1   | 1 | S03 |
| .....Ngugucuuagacugauuuugaagu.....     | 1   | 1 | S03 |
| .....agugucuuagacugGuuuugaagu.....     | 4   | 1 | S03 |
| .....agugucuuagacugauuuugGagu.....     | 1   | 1 | S03 |
| .....agugucuuagacugauuuugaagu.....     | 576 | 0 | S03 |
| .....agGgucuuagacugauuuugaagu.....     | 3   | 1 | S03 |
| .....agugucuuagacugaCuaugaagu.....     | 1   | 1 | S03 |
| .....agugucuuagacugaAuaugaagu.....     | 38  | 1 | S03 |
| .....Cgugucuuagacugauuuugaagu.....     | 3   | 1 | S03 |
| .....Ugugucuuagacugauuuugaagu.....     | 3   | 1 | S03 |
| .....agugucuuagaAugauuuugaagu.....     | 1   | 1 | S03 |
| .....agugucuuagacugauuuugaGgu.....     | 2   | 1 | S03 |
| .....aUugucuuagacugauuuugaagu.....     | 2   | 1 | S03 |
| .....agugucuuagacugauuuugaagC.....     | 56  | 1 | S03 |
| .....agugucuuagacugauuaCgaagu.....     | 1   | 1 | S03 |
| .....agAgucuuagacugauuuugaagu.....     | 1   | 1 | S03 |
| .....agugAcuuagacugauuuugaagu.....     | 1   | 1 | S03 |
| .....agugucuCgacugauuuugaagu.....      | 2   | 1 | S03 |
| .....agugucuuagacugauuuugaaguc.....    | 2   | 0 | S03 |
| .....agugucuuagacugauuuugaagUG.....    | 3   | 1 | S03 |
| .....agugucuuagacugauuuugaaguca.....   | 5   | 0 | S03 |
| .....agugucuuagacugauuuugaagucG.....   | 2   | 1 | S03 |
| .....agGgucuuagacugauuuugaagucaaa..... | 1   | 1 | S03 |
| .....agugucuuagacugaAuaugaagucaaa..... | 1   | 1 | S03 |
| .....agugucuuagacugauuuugaagucaaa..... | 1   | 0 | S03 |
| .....gugucuuagacugaAuaug.....          | 1   | 1 | S03 |
| .....gugucuuagacugauuuuga.....         | 2   | 0 | S03 |
| .....gugucuuagacugauuuugaC.....        | 1   | 1 | S03 |
| .....gugucuuagacugauuuugaa.....        | 2   | 0 | S03 |
| .....gugucuuagaAugauuuugaag.....       | 1   | 1 | S03 |
| .....gugucuuagacugauuuugaag.....       | 12  | 0 | S03 |
| .....gugucuuagacugaCuaugaag.....       | 1   | 1 | S03 |
| .....gugucuuagacugaAuaugaag.....       | 1   | 1 | S03 |
| .....guUucuuagacugauuuugaag.....       | 1   | 1 | S03 |
| .....gugucuuagacugaAuaugaagu.....      | 5   | 1 | S03 |
| .....gugucuuagacCgauuuugaagu.....      | 2   | 1 | S03 |
| .....gugucuuagacugauuuugaagC.....      | 6   | 1 | S03 |
| .....gugucuuagacugauuuugaagu.....      | 34  | 0 | S03 |
| .....gugucuuagacugauuuugaagA.....      | 2   | 1 | S03 |
| .....Cugucuuagacugauuuugaagu.....      | 1   | 1 | S03 |
| .....gugucuuagacugauuuugUaguc.....     | 1   | 1 | S03 |
| .....guUucuuagacugauuuugaaguc.....     | 3   | 1 | S03 |
| .....gugucuuagacugauuuugaUguc.....     | 1   | 1 | S03 |
| .....gAgucuuagacugauuuugaaguc.....     | 1   | 1 | S03 |
| .....gugucuuagacugauAuaugaaguc.....    | 1   | 1 | S03 |
| .....gugucuuagacugGuuuugaaguc.....     | 3   | 1 | S03 |
| .....gugucuuagacugauuuugaGguc.....     | 5   | 1 | S03 |
| .....gugucGuagacugauuuugaaguc.....     | 1   | 1 | S03 |
| .....gugucuuagacugaAuaugaaguc.....     | 20  | 1 | S03 |
| .....gugucuuUgacugauuuugaaguc.....     | 1   | 1 | S03 |
| .....gugucuCgacugauuuugaaguc.....      | 1   | 1 | S03 |
| .....gugucuuagacugauuuugaaguG.....     | 6   | 1 | S03 |
| .....gugucuuagacugaCuaugaaguc.....     | 2   | 1 | S03 |
| .....gugGcuuagacugauuuugaaguc.....     | 1   | 1 | S03 |
| .....gugucuuagacCgauuuugaaguc.....     | 2   | 1 | S03 |
| .....gugucuuagacugauuuugaagCc.....     | 6   | 1 | S03 |
| .....gugucuuagacugauuuugaaguc.....     | 477 | 0 | S03 |
| .....gugucuuagacugauuaCgaaguc.....     | 1   | 1 | S03 |
| .....gugucuuagacugauuuugGaguc.....     | 5   | 1 | S03 |
| .....gGgucuuagacugauuuugaaguc.....     | 1   | 1 | S03 |
| .....gCgucuuagacugauuuugaaguc.....     | 2   | 1 | S03 |
| .....gugucuuagacugauuuAgaaguc.....     | 1   | 1 | S03 |
| .....Uugucuuagacugauuuugaaguc.....     | 5   | 1 | S03 |

Star

Mature

Table with 5 columns: Sequence (with colored markers), Count, Count, Count, and S03. The table lists various nucleotide sequences and their corresponding counts. The 'Star' section is color-coded: 'g' is green, 'a' is purple, 'c' is blue, 'u' is orange, and 'a' is pink. The 'Mature' section is color-coded: 'a' is green, 'g' is purple, 'u' is blue, 'c' is orange, 'g' is pink, and 'a' is light blue.

Star

Mature

gaguuuuuuaaaccgaaagcaacguuuugcaguugaauaacacuuauuuuaaaccuuauuagugucuuagacugauuuugaagucaaaaauuuguuccuuacccuuauauaaa

|                                                   |    |   |     |
|---------------------------------------------------|----|---|-----|
| . . . . .ugaagucaaaCauuuguuccuuac . . . . .       | 1  | 1 | S03 |
| . . . . .ugaagucaaaauuuguuccuuac . . . . .        | 1  | 0 | S03 |
| . . . . .gaagucaaaCauuuguucc . . . . .            | 1  | 1 | S03 |
| . . . . .gaagucaaaCauuuguuccuuac . . . . .        | 1  | 1 | S03 |
| . . . . .gaagucaaaauuuguuccuuacU . . . . .        | 1  | 1 | S03 |
| . . . . .gaagucaaGauuuguuccuuacc . . . . .        | 1  | 1 | S03 |
| . . . . .gaagucaaaauuuguuccuuacc . . . . .        | 1  | 0 | S03 |
| . . . . .aagucaaaauuuguuccuuacc . . . . .         | 1  | 0 | S03 |
| . . . . .agucaaaauuuguuccuu . . . . .             | 1  | 0 | S03 |
| . . . . .agucaaaauuuguuccuuacU . . . . .          | 1  | 1 | S03 |
| . . . . .agucaaaCauuuguuccuuacc . . . . .         | 1  | 1 | S03 |
| . . . . .gucaaaauuuguuccuuaccA . . . . .          | 1  | 1 | S03 |
| . . . . .gucaaaauuuguuccuuaccG . . . . .          | 1  | 1 | S03 |
| . . . . .gucaaaCauuuguuccuuaccu . . . . .         | 2  | 1 | S03 |
| . . . . .ucaaaCauuuguuccuuaccu . . . . .          | 1  | 1 | S03 |
| . . . . .ucaaaCauuuguuccuuaccua . . . . .         | 1  | 1 | S03 |
| . . . . .ucaaaCauuuguuccuuaccuau . . . . .        | 1  | 1 | S03 |
| . . . . .ucaaaaauuuguuccuuaccuC . . . . .         | 1  | 1 | S03 |
| . . . . .ucaaaaauuuguuccuuaccuGu . . . . .        | 1  | 1 | S03 |
| . . . . .caaaCauuuguuccuuaccuau . . . . .         | 1  | 1 | S03 |
| . . . . .caaaCauuuguuccuuaccuua . . . . .         | 1  | 1 | S03 |
| . . . . .aaaCauuuguuccuuaccuua . . . . .          | 2  | 1 | S03 |
| . . . . .aCauuuguuccuuaccuau . . . . .            | 1  | 1 | S03 |
| . . . . .Cauuuguuccuuaccuua . . . . .             | 1  | 1 | S03 |
| . . . . .Cauuuguuccuuaccuuaau . . . . .           | 1  | 1 | S03 |
| . . . . .aaauuguuccuuaccuuaauG . . . . .          | 1  | 1 | S03 |
| . . . . .auuuguuccuuaccuauU . . . . .             | 1  | 1 | S03 |
| . . . . .auuuUuuccuuaccuuaauaaa . . . . .         | 1  | 1 | S03 |
| . . . . .acguuuugcaguugaauaacacG . . . . .        | 1  | 1 | S04 |
| . . . . .uugaauaacacuuauuaaccu . . . . .          | 1  | 0 | S04 |
| . . . . .uugaauaacacuuauuaaccuG . . . . .         | 2  | 1 | S04 |
| . . . . .gaauaacacuuauuaaccu . . . . .            | 1  | 0 | S04 |
| . . . . .uaagugucuuagacugauuauug . . . . .        | 4  | 0 | S04 |
| . . . . .uaagugucuuagacugauuauuga . . . . .       | 6  | 0 | S04 |
| . . . . .uaagugucuuagacugauuauuga . . . . .       | 1  | 0 | S04 |
| . . . . .uaagugucuuagacugauuauugaC . . . . .      | 2  | 1 | S04 |
| . . . . .uaagugucuuagacugauuauugaaguca . . . . .  | 1  | 0 | S04 |
| . . . . .aagugucuuagacugauu . . . . .             | 4  | 0 | S04 |
| . . . . .aagugucuuagacugauuau . . . . .           | 2  | 0 | S04 |
| . . . . .aagugucuuagacugauuauug . . . . .         | 3  | 0 | S04 |
| . . . . .aGugucuuagacugauuauuga . . . . .         | 2  | 1 | S04 |
| . . . . .aagugucuuagacugauuauuga . . . . .        | 21 | 0 | S04 |
| . . . . .aagugucuuagacugauuauuga . . . . .        | 1  | 1 | S04 |
| . . . . .aagugucuuagacugauuauuga . . . . .        | 6  | 0 | S04 |
| . . . . .aagugucuuagacugauuauugaC . . . . .       | 1  | 1 | S04 |
| . . . . .aagugucuuagacuguuauugaag . . . . .       | 1  | 1 | S04 |
| . . . . .Gagugucuuagacugauuauugaag . . . . .      | 2  | 1 | S04 |
| . . . . .aagugucuuagacugauuauugaag . . . . .      | 79 | 0 | S04 |
| . . . . .aagugucuuagGcugauuauugaag . . . . .      | 1  | 1 | S04 |
| . . . . .aCgugucuuagacugauuauugaag . . . . .      | 5  | 1 | S04 |
| . . . . .aagugucuuGgacugauuauugaag . . . . .      | 1  | 1 | S04 |
| . . . . .aagugucuuagacugauuauugaCg . . . . .      | 1  | 1 | S04 |
| . . . . .Cagugucuuagacugauuauugaag . . . . .      | 1  | 1 | S04 |
| . . . . .aagugucuuagacugaAuauugaag . . . . .      | 5  | 1 | S04 |
| . . . . .aagugucuuagacugauuauugaag . . . . .      | 1  | 1 | S04 |
| . . . . .aUgugucuuagacugauuauugaag . . . . .      | 1  | 1 | S04 |
| . . . . .aagugucuuagacugauuauugGag . . . . .      | 2  | 1 | S04 |
| . . . . .aagGgucuuagacugauuauugaag . . . . .      | 1  | 1 | S04 |
| . . . . .aagugucuuagacugauuauugaagA . . . . .     | 2  | 1 | S04 |
| . . . . .aagugucuuagacugauuauugaagC . . . . .     | 3  | 1 | S04 |
| . . . . .aagugucuuagUcugauuauugaagu . . . . .     | 1  | 1 | S04 |
| . . . . .aagugucuuagacugauuauugaagu . . . . .     | 15 | 0 | S04 |
| . . . . .aagugucuuagacCgauuauugaagu . . . . .     | 1  | 1 | S04 |
| . . . . .aagugucuuagacugaAuauugaaguca . . . . .   | 1  | 1 | S04 |
| . . . . .aagugucuuagacugauuauugaaguca . . . . .   | 2  | 0 | S04 |
| . . . . .aagugucuuagacugauuauugaagucaaa . . . . . | 3  | 0 | S04 |
| . . . . .aagugucuuagacugauuauugaagucaaa . . . . . | 1  | 0 | S04 |
| . . . . .agugucuuagacugauuauugaCga . . . . .      | 1  | 1 | S04 |
| . . . . .agugucuuagacugauuauuga . . . . .         | 10 | 0 | S04 |

Star

Mature

gaguuuuaaacgaaagcaacguuuugcaguugaauaacacuuauauuaaccuuauuaagugucuuagacugauuuugaagucaaaaauuuguccuuaccuuauuaaaa

|                                        |     |   |     |
|----------------------------------------|-----|---|-----|
| .....agugucuuagGcugauuuuga.....        | 1   | 1 | S04 |
| .....agugucuuagacugauuuuga.....        | 4   | 0 | S04 |
| .....agugucuuagacugauuuugaag.....      | 4   | 0 | S04 |
| .....agugucuuagacugauuuugaag.....      | 1   | 1 | S04 |
| .....agGcuguuagacugauuuugaagu.....     | 4   | 1 | S04 |
| .....agugucuuagacugauuuugaCu.....      | 1   | 1 | S04 |
| .....agugucuuagacugauuuAgaagu.....     | 1   | 1 | S04 |
| .....agugucuuGgacugauuuugaagu.....     | 1   | 1 | S04 |
| .....agugucuuagUcugauuuugaagu.....     | 1   | 1 | S04 |
| .....agugucuuagacugauuuugaagu.....     | 5   | 1 | S04 |
| .....Ugugucuuagacugauuuugaagu.....     | 1   | 1 | S04 |
| .....agugucuuagaAugauuuugaagu.....     | 1   | 1 | S04 |
| .....agugucuuagacugauuuCgaagu.....     | 3   | 1 | S04 |
| .....agugAcuuagacugauuuugaagu.....     | 1   | 1 | S04 |
| .....aguUucuuagacugauuuugaagu.....     | 1   | 1 | S04 |
| .....agugucuuagacugauuuugaagu.....     | 257 | 0 | S04 |
| .....agugucuuagGcugauuuugaagu.....     | 1   | 1 | S04 |
| .....agugucuuagacugCuuuugaagu.....     | 2   | 1 | S04 |
| .....agugucuuagacugauuuugaagG.....     | 8   | 1 | S04 |
| .....agAgucuuagacugauuuugaagu.....     | 1   | 1 | S04 |
| .....agugucuuagacugauuuugaagA.....     | 6   | 1 | S04 |
| .....agugucuuagacugauuuCaagu.....      | 1   | 1 | S04 |
| .....Ggugucuuagacugauuuugaagu.....     | 3   | 1 | S04 |
| .....agugucuuagacugGuuuugaagu.....     | 6   | 1 | S04 |
| .....aCugucuuagacugauuuugaagu.....     | 1   | 1 | S04 |
| .....agugucuuagacugauuuugUagu.....     | 1   | 1 | S04 |
| .....agugucuuagacugauuuugaagC.....     | 26  | 1 | S04 |
| .....agugucuuagacugGuuuugaaguc.....    | 1   | 1 | S04 |
| .....agugucuuagacugauuuugaagG.....     | 1   | 1 | S04 |
| .....agugucuuagacugauuuugaaguc.....    | 1   | 0 | S04 |
| .....agugucuuagacugauuuugaagucG.....   | 2   | 1 | S04 |
| .....agugucuuagacugauuuugaaguca.....   | 4   | 0 | S04 |
| .....agugucuuagacugauuuugaagucU.....   | 1   | 1 | S04 |
| .....agugucuuagacugauuuugaagucaaa..... | 1   | 0 | S04 |
| .....gugucuuagacugauuuuga.....         | 2   | 0 | S04 |
| .....gugucuuagacugauuuuga.....         | 1   | 0 | S04 |
| .....gugucuuagacugauuuugaGg.....       | 1   | 1 | S04 |
| .....gugucuuagacugauuuugaag.....       | 2   | 0 | S04 |
| .....gugucuuagacugauuuugaag.....       | 1   | 1 | S04 |
| .....gugucuuagacugauuuugaagC.....      | 2   | 1 | S04 |
| .....gugucuuagacugauuuugaagu.....      | 1   | 1 | S04 |
| .....gugucuuagacugauuuugaagu.....      | 23  | 0 | S04 |
| .....gugucuuagacugauuuugaagu.....      | 1   | 1 | S04 |
| .....gugucuuagacugauuuugaagA.....      | 2   | 1 | S04 |
| .....gugucuuagacCgauuuugaagu.....      | 1   | 1 | S04 |
| .....Ugucucuuagacugauuuugaagu.....     | 1   | 1 | S04 |
| .....gugucAuagacugauuuugaaguc.....     | 1   | 1 | S04 |
| .....gugucuuagaAugauuuugaaguc.....     | 1   | 1 | S04 |
| .....gugucuuGgacugauuuugaaguc.....     | 1   | 1 | S04 |
| .....gugucuuagacugauuuugaagucG.....    | 2   | 1 | S04 |
| .....gugucuuagacugauuuugaaguc.....     | 4   | 1 | S04 |
| .....gugucuuagacugauuuugaagGc.....     | 1   | 1 | S04 |
| .....gGgucuuagacugauuuugaaguc.....     | 2   | 1 | S04 |
| .....guUucuuagacugauuuugaaguc.....     | 1   | 1 | S04 |
| .....gugucuuagacugGuuuugaaguc.....     | 1   | 1 | S04 |
| .....gugucuuagacugauuuugaaguc.....     | 185 | 0 | S04 |
| .....gugucuuUgacugauuuugaaguc.....     | 1   | 1 | S04 |
| .....gCgucuuagacugauuuugaaguc.....     | 1   | 1 | S04 |
| .....gugucuuagacuCaauuugaaguc.....     | 1   | 1 | S04 |
| .....gugucuuagacugauuuugaUguc.....     | 1   | 1 | S04 |
| .....gugucuuagGcugauuuugaaguc.....     | 1   | 1 | S04 |
| .....gugucuuagacugauuuugaGguc.....     | 2   | 1 | S04 |
| .....Ugucucuuagacugauuuugaaguc.....    | 4   | 1 | S04 |
| .....gugucuuagacugauuuugaagCc.....     | 1   | 1 | S04 |
| .....gugucCuCagacugauuuugaaguca.....   | 1   | 1 | S04 |
| .....gugucuuagacugauuuugaagucC.....    | 2   | 1 | S04 |
| .....gugucuuagacugauuuugaagucG.....    | 1   | 1 | S04 |
| .....gugucuuagacugauuuugaaguca.....    | 5   | 0 | S04 |
| .....gugucuuagacugauuuugaagucaaa.....  | 2   | 0 | S04 |
| .....ugucuuagacugauuuuga.....          | 1   | 0 | S04 |

Star

Mature

gaguuuuuuaaccgaaagcaacguuuugcaguuugaauaacacuuauauuaaccuuauuaagugucuuagacugauuuugaagucaaaaauuuguuccuuaccuuauaauaaa

|                                    |    |   |     |
|------------------------------------|----|---|-----|
| .....ugucuuagacugauuuugaagG.....   | 2  | 1 | S04 |
| .....ugucuuagacugauuuugaagu.....   | 7  | 0 | S04 |
| .....ugucuuagacugauuuugaaguc.....  | 3  | 0 | S04 |
| .....ugucuuagacugauuuugaagucU..... | 1  | 1 | S04 |
| .....ugucuuagacugauuuugaauAua..... | 1  | 1 | S04 |
| .....uUucuuagacugauuuugaaguca..... | 2  | 1 | S04 |
| .....ugucuuagacugauuuugaagCca..... | 1  | 1 | S04 |
| .....ugucuuagacugauuuugaaguca..... | 26 | 0 | S04 |
| .....ugucuuagGcugauuuugaaguca..... | 1  | 1 | S04 |
| .....ugucuuagacugauuuugaagucG..... | 2  | 1 | S04 |
| .....gucuuagacugauuuugaagu.....    | 2  | 0 | S04 |
| .....gucuuagacugauuuugaaguc.....   | 3  | 0 | S04 |
| .....gucuuagacugauuuugaaguca.....  | 3  | 0 | S04 |
| .....gucuuagacugauuuugaagucaU..... | 1  | 1 | S04 |
| .....ucuuagacugauuuugaagC.....     | 1  | 1 | S04 |
| .....ucuuagacugauuuugaagu.....     | 1  | 0 | S04 |
| .....ucuuagacugauuuugaaguc.....    | 1  | 0 | S04 |
| .....ucuuagacugauuuugaagucG.....   | 1  | 1 | S04 |
| .....ucuuagacugaAuugaaguca.....    | 1  | 1 | S04 |
| .....ucuuagacugauuuugaaguca.....   | 18 | 0 | S04 |
| .....ucuuagacugauuuugaagAca.....   | 1  | 1 | S04 |
| .....ucuuagacugGuugaaguca.....     | 1  | 1 | S04 |
| .....ucuuagacugauuuugaagucua.....  | 1  | 0 | S04 |
| .....cuuagacugauuuugaag.....       | 2  | 0 | S04 |
| .....cuuagacugauuuugaaguc.....     | 1  | 0 | S04 |
| .....cuuagacugauuuugaaguca.....    | 7  | 0 | S04 |
| .....cuuagacugaAuugaaguca.....     | 1  | 1 | S04 |
| .....agacugGuugaaguca.....         | 1  | 1 | S04 |
| .....auuugaagucuaaaCauuuguucc..... | 2  | 1 | S04 |
| .....uugaagucuaaaCauuuguuccuu..... | 1  | 1 | S04 |
| .....augaagucuaaaaauuuguuccua..... | 2  | 0 | S04 |
| .....gaagucuaaaaauuuguuccu.....    | 1  | 0 | S04 |
| .....aagucuaaaaauuuguuccuacc.....  | 1  | 0 | S04 |
| .....aagucuaaaaauuuguuccuacc.....  | 1  | 0 | S04 |
| .....agucuaaaaauuuguuccuaccu.....  | 3  | 0 | S04 |
| .....gucuaaaaauuuguuccuaccC.....   | 1  | 1 | S04 |
| .....gucuaaaaauuuguuccuaccCG.....  | 1  | 1 | S04 |
| .....gucuaaaaauuuguuccuaccua.....  | 1  | 1 | S04 |
| .....ucaaaaauuuguuccuaccua.....    | 1  | 0 | S04 |
| .....ucaaaaauuuguuccuaccua.....    | 2  | 0 | S04 |
| .....ucCaaaauuuguuccuaccua.....    | 1  | 1 | S04 |
| .....ucaaaaauuuguuccuaccuGu.....   | 1  | 1 | S04 |
| .....caaaaauuuguuccuaccu.....      | 1  | 0 | S04 |
| .....caGaaaauuuguuccuaccua.....    | 1  | 1 | S04 |
| .....caaaaauuuguuccuaccua.....     | 1  | 1 | S04 |
| .....aaaaauuuguuccuaccua.....      | 1  | 0 | S04 |
| .....aaaaauuuguuccuaccua.....      | 1  | 0 | S04 |
| .....aaaaauuuguuccuaccC.....       | 1  | 1 | S04 |
| .....aaaaauuuguuccuaccua.....      | 2  | 0 | S04 |
| .....aaaaauuuguuccuaccuaCu.....    | 1  | 1 | S04 |
| .....aaaaauuuguuccuaccua.....      | 1  | 0 | S04 |
| .....aaaaauuuguuccuaccua.....      | 1  | 1 | S04 |
| .....aaaaauuuguuccuaccuaCa.....    | 1  | 1 | S04 |
| .....aaaaauuuguuccuaccua.....      | 1  | 0 | S04 |
| .....aaaaauuuguuccuaccua.....      | 3  | 0 | S04 |
| .....Cauuuguuccuaccuuaaauaa.....   | 1  | 1 | S04 |
| .....auuuguuccuaccuuaaauaaa.....   | 1  | 0 | S04 |
| .....uuguuccuaccuuaaauaa.....      | 1  | 0 | S04 |













Provisional ID : chrCnn\_random\_3300747  
Score total : 116.1  
Score for star read(s) : 3.9  
Score for read counts : 114.8  
Score for mfe : -2.5  
Score for randfold : 0  
Score for cons. seed :  
Total read count : 237  
Mature read count : 228  
Loop read count : 2  
Star read count : 7

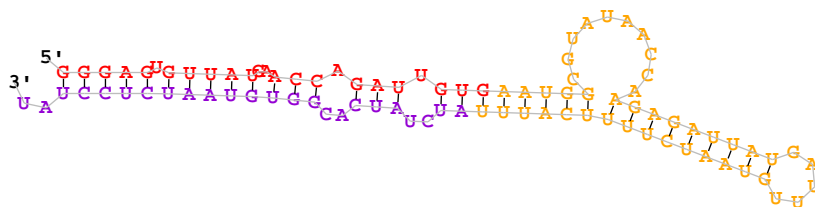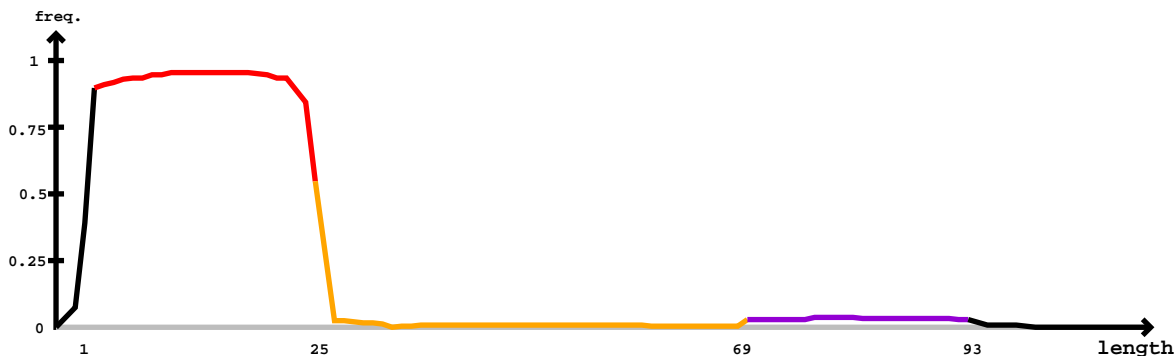

**Mature**

**Star**

```

5' - gggggaguguuaugaaccagauugugaauuggcguauaaccaagagauuauugauuuguaaucuuuuucauuuaucuaucacgguguaaucuccuaauuaaagaaucucuauguu -3'   obs
gggggaguguuaugaaccagauugugaauuggcguauaaccaagagauuauugauuuguaaucuuuuucauuuaucuaucacgguguaaucuccuaauuaaagaaucucuauguu   exp
..(((.(((..(((..(((.....(((.....)))))))))))))).....reads      mm      sample
gggggGguguuauugaaccaga.....1      1      S03
gggggaguguuauugaaccagauG.....1      1      S03
gggggaguguuauugaaccagau.....2      0      S03
gggggaguguuauugaaccagauA.....1      1      S03
gggggaguguuauugaaccagaCug.....1      1      S03
gggggaguguuauugaaccagauug.....2      0      S03
.ggggaguguuauugaaccagauu.....3      0      S03
.ggggaguguuauugaaccagauuG.....1      1      S03
.ggggaguguuauugaGccagauugu.....1      1      S03
.ggggaguguuauugaaccagauugu.....19     0      S03
.ggggaguguuauugaaccagauugu.....1      1      S03
.ggggaguguuauugaaccaga.....1      0      S03
.ggggaguguuauugaaccagauugu.....1      0      S03
.ggggaguguuauugaaccagauugug.....27     0      S03
.ggggaguguuauugaaccagauugU.....4      1      S03
.ggggaguguuauugaaccagauuGg.....1      1      S03
.Ngggaguguuauugaaccagauugug.....1      1      S03
.ggggaguguuauugaaccagauugu.....1      0      S03
.ggggaguguuauugaaccagauugug.....2      0      S03
.ggggaguguuauugaaccagauugug.....1      0      S03
.ggggaguguuauugaaccagauugugaau.....1      0      S03
.ggggaguguuauugaaccagauugGauggcg.....1      1      S03
.ggggaguguuauugaaccagauugGauggcg.....1      1      S03
.ggggaguguuauugaaccagauuugua.....1      0      S03
.ggggaguguuauugaaccagauuuguaucuaucacgguguaaucuccuaC.....1      1      S03
.ggggaguguuauugaaccagauuuguaucuaucacgguguaaucuccua.....1      1      S03
.ggggaguguuauugaaccagauuuguaacgguguaaucuccuaaaaa.....1      0      S03
.ggggaguguuauugaaccagauuuguaacgguguaaucuccuaauaaag.....1      0      S03

gggggaguguuauugaacca.....1      0      S04
gggggaguguuauugaaccag.....1      0      S04
  
```

# Mature

# Star

|                                                                                                          |    |   |     |
|----------------------------------------------------------------------------------------------------------|----|---|-----|
| gggggaguguuugaaccagauuggaauggcguaaaccagagauuugauuuguaauuuucauuuaucauacacggguguaucuccuauaauaagaauucuauguu |    |   |     |
| gggggaguguuugaaccagauu.....                                                                              | 2  | 0 | S04 |
| gggggaguguuugaaccagauug.....                                                                             | 4  | 0 | S04 |
| gggggaguguuugaaccagauug.....                                                                             | 2  | 1 | S04 |
| .gggggaguguuugaaccagauug.....                                                                            | 2  | 0 | S04 |
| .gggggaguguuugaaccagauug.....                                                                            | 30 | 0 | S04 |
| .gUgggaguguuugaaccagauug.....                                                                            | 1  | 1 | S04 |
| .gggggaguguuugUaccagauug.....                                                                            | 1  | 1 | S04 |
| .gggggaguguuugaaccagauugC.....                                                                           | 7  | 1 | S04 |
| .gggggaguguuugaaccGgauug.....                                                                            | 2  | 1 | S04 |
| .gggggaguguuugaaccagauugG.....                                                                           | 2  | 1 | S04 |
| .gggggaguguuugaaccagauugug.....                                                                          | 3  | 0 | S04 |
| .gggggaguguuugaaccagauugug.....                                                                          | 1  | 1 | S04 |
| .gggggaguguuugaaccagU.....                                                                               | 1  | 1 | S04 |
| .gggggaguguuugaaccagauu.....                                                                             | 1  | 0 | S04 |
| .gggggaguuugaaccagauug.....                                                                              | 1  | 1 | S04 |
| .gggggaguguuugaaccagauug.....                                                                            | 3  | 0 | S04 |
| .gggggaguuuCGaaccagauugug.....                                                                           | 1  | 1 | S04 |
| .gggggaguguuugaGccagauugug.....                                                                          | 1  | 1 | S04 |
| .gggggaguguuugaaccGgauugug.....                                                                          | 1  | 1 | S04 |
| .gggggaguguuugaaccagauugug.....                                                                          | 75 | 0 | S04 |
| .gggggaguguuugaaccagauuUug.....                                                                          | 1  | 1 | S04 |
| .gggggaguguuugGaccagauugug.....                                                                          | 1  | 1 | S04 |
| .gggggaguguuugaaccagauugGg.....                                                                          | 2  | 1 | S04 |
| ...gaguguuugaaccagauu.....                                                                               | 1  | 0 | S04 |
| ...gaguguuugaaccagauuguga.....                                                                           | 1  | 0 | S04 |
| ...aguguuugaaccagauug.....                                                                               | 1  | 0 | S04 |
| ...guguuugaaccagauuggaaUA.....                                                                           | 1  | 1 | S04 |
| ...guuugaaccagauugug.....                                                                                | 1  | 0 | S04 |
| ...guuugaaccagauuggaauggc.....                                                                           | 1  | 0 | S04 |
| ...uugaaccagauugGauggcg.....                                                                             | 1  | 1 | S04 |
| .....aaccagagauuugauuuguaau.....                                                                         | 1  | 0 | S04 |
| .....aucuuucauuuaucauacacggG.....                                                                        | 1  | 1 | S04 |
| .....aucuacacggguguaucuccu.....                                                                          | 1  | 0 | S04 |
| .....aucuacacggguguaucuccuau.....                                                                        | 3  | 0 | S04 |

Provisional ID : chrCnn\_random\_3301528  
 Score total : 1.2  
 Score for star read(s) : -1.3  
 Score for read counts : 0  
 Score for mfe : 2.5  
 Score for randfold : 0  
 Score for cons. seed :  
 Total read count : 63  
 Mature read count : 57  
 Loop read count : 0  
 Star read count : 6

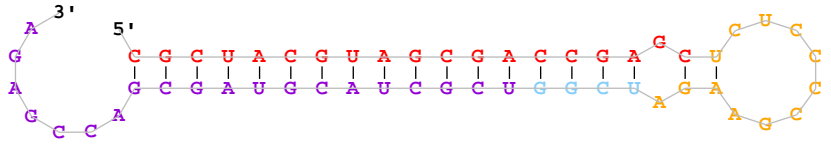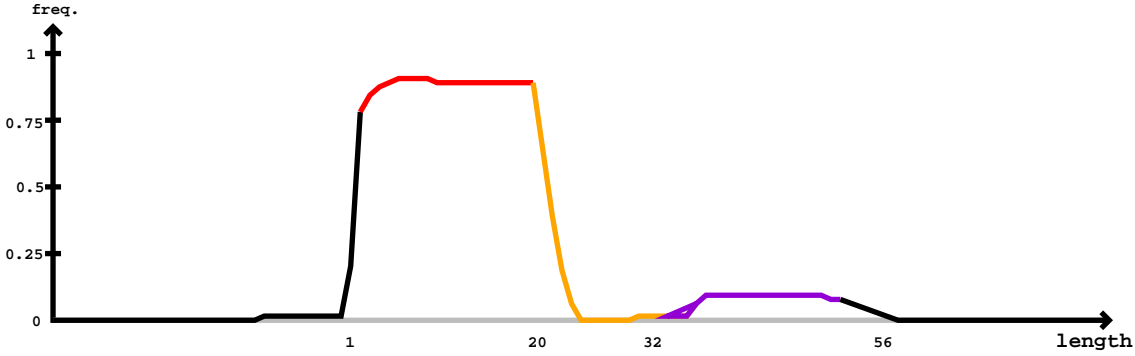

Mature Star

| 5'                                                                                                   | reads | mm | sample |
|------------------------------------------------------------------------------------------------------|-------|----|--------|
| aaugcgaccaagcacgguacacggauagcgcgcuacguagcgaccgagcucucccgaagaucggucgcuac                              | 1     | 0  | S03    |
| aaugcgaccaagcacgguacacggauagcgcgcuacguagcgaccgagcucucccgaagaucggucgcuacgacgagaucucccgaagcucggucgcuac | 3     | 0  | S03    |
| ..((((((.....)))..(((.....))))))))....                                                               | 2     | 0  | S03    |
| .....acggauagcguacgu.....                                                                            | 1     | 0  | S03    |
| .....ucgcuacguagcgaccgagc.....                                                                       | 3     | 0  | S03    |
| .....ucgcuacguagcgaccgagc.....                                                                       | 2     | 0  | S03    |
| .....ucgcuacguagcgaccgagc.....                                                                       | 2     | 0  | S03    |
| .....ucgcuacguagcgaccgagc.....                                                                       | 1     | 0  | S03    |
| .....cgcuacguagcgaccgagc.....                                                                        | 17    | 0  | S03    |
| .....cgcuacguagcgaccgagc.....                                                                        | 1     | 1  | S03    |
| .....cgcuacguagcgaccgagc.....                                                                        | 2     | 0  | S03    |
| .....cgcuacguagcgaccgagc.....                                                                        | 7     | 0  | S03    |
| .....Ggcuacguagcgaccgagc.....                                                                        | 1     | 1  | S03    |
| .....cgcuacguagcgaccgagc.....                                                                        | 1     | 1  | S03    |
| .....cgcuacgAagcgaccgagc.....                                                                        | 1     | 1  | S03    |
| .....cgcuacgUagcgaccgagc.....                                                                        | 1     | 1  | S03    |
| .....cgcuacgCagcgaccgagc.....                                                                        | 2     | 0  | S03    |
| .....gcuacguagcgaccgagc.....                                                                         | 1     | 0  | S03    |
| .....gcuacguagcgaccgagc.....                                                                         | 1     | 0  | S03    |
| .....gcuacguagcgaccgagc.....                                                                         | 1     | 0  | S03    |
| .....cuacguagcgaccgagc.....                                                                          | 2     | 0  | S03    |
| .....gcuacguagcgaccgagc.....                                                                         | 1     | 1  | S03    |
| .....ucgcuacguagcgaccgagc.....                                                                       | 1     | 0  | S03    |
| .....Cgcuacguagcgaccgagc.....                                                                        | 2     | 1  | S03    |
| .....cgcuacguagcgaccgagc.....                                                                        | 2     | 0  | S03    |
| .....ucgcuacguagcgaccgagc.....                                                                       | 1     | 0  | S04    |
| .....ucgcuacguagcgaccgagc.....                                                                       | 1     | 0  | S04    |
| .....ucgcuacguagcgaccgagc.....                                                                       | 1     | 0  | S04    |
| .....Ccgcuacguagcgaccgagc.....                                                                       | 1     | 1  | S04    |
| .....cgcuacguagcgaccgagc.....                                                                        | 1     | 0  | S04    |
| .....cgcuacguagcgaccgagc.....                                                                        | 1     | 0  | S04    |
| .....cgcuacguagcgaccgagc.....                                                                        | 1     | 0  | S04    |
| .....cgcuacguagcgaccgagc.....                                                                        | 1     | 0  | S04    |
| .....cgcuacguagcgaccgagc.....                                                                        | 1     | 0  | S04    |
| .....cgcuacguagcgaccgagc.....                                                                        | 1     | 1  | S04    |
| .....gcuacguagcgaccgagc.....                                                                         | 1     | 0  | S04    |
| .....uacguagcgaccgagc.....                                                                           | 1     | 0  | S04    |



**Mature**

**Star**

aauagcgaccaagcacgacacggaucggcuacguagcgaccgagcuccccgaagaucggucgcuacguagcgaccgagaucccccgaagcucggucgcuac  
.....acguGgagaccgagcu.....

1

1

S04

Provisional ID : chrCnn\_random\_3307531  
 Score total : 0.4  
 Score for star read(s) : -1.3  
 Score for read counts : 0  
 Score for mfe : 1.7  
 Score for randfold : 0  
 Score for cons. seed :  
 Total read count : 203  
 Mature read count : 201  
 Loop read count : 0  
 Star read count : 2

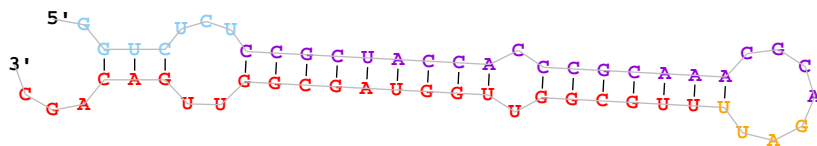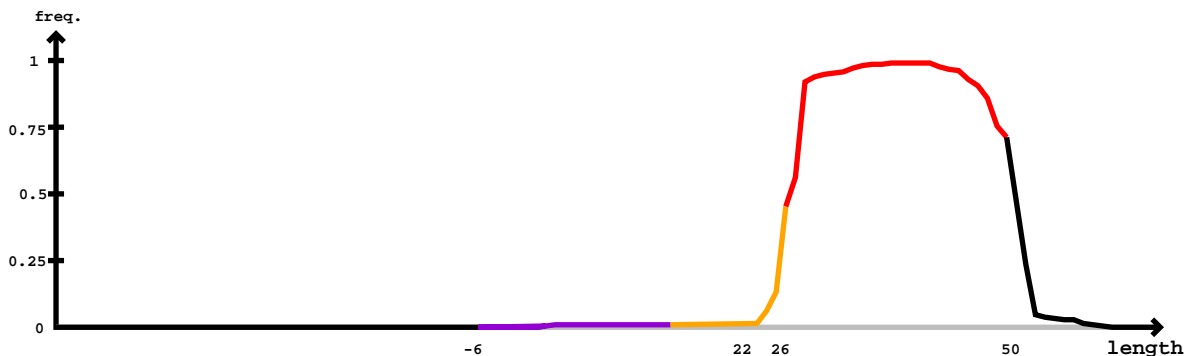

**Star** **Mature**

| 5' -                                                                                                             | Star                                                                                                             | Mature                                                                                                           | -3'   | obs | mm | sample |
|------------------------------------------------------------------------------------------------------------------|------------------------------------------------------------------------------------------------------------------|------------------------------------------------------------------------------------------------------------------|-------|-----|----|--------|
| caagagucucuaaaaugaucuaauucucuuuugggucugacuggucucuccgcuaccaccgcaaacgcagauuuugcgguugguagcgguugacagcguuucgaaacaauca | caagagucucuaaaaugaucuaauucucuuuugggucugacuggucucuccgcuaccaccgcaaacgcagauuuugcgguugguagcgguugacagcguuucgaaacaauca | caagagucucuaaaaugaucuaauucucuuuugggucugacuggucucuccgcuaccaccgcaaacgcagauuuugcgguugguagcgguugacagcguuucgaaacaauca |       |     |    |        |
| .....(((.....((.....))).....)).....(((.....((((((((.....)))))).....)))).....)).....                              | .....(((.....(((.....(((.....)))).....)))).....)).....                                                           | .....(((.....((((((((.....)))))).....)))).....)).....                                                            |       |     |    |        |
| .....ccgcuaccaccgcaaacgca.....                                                                                   | .....ccgcuaccaccgcaaacgca.....                                                                                   | .....ccgcuaccaccgcaaacgca.....                                                                                   | reads | exp |    |        |
| .....gauuuugcgguugguagcgguugC.....                                                                               | .....gauuuugcgguugguagcgguugC.....                                                                               | .....gauuuugcgguugguagcgguugC.....                                                                               | 1     | 0   | 0  | S03    |
| .....uuuugcgguugguagcggg.....                                                                                    | .....uuuugcgguugguagcggg.....                                                                                    | .....uuuugcgguugguagcggg.....                                                                                    | 1     | 1   | 1  | S03    |
| .....uuuugcgguugguagcggg.....                                                                                    | .....uuuugcgguugguagcggg.....                                                                                    | .....uuuugcgguugguagcggg.....                                                                                    | 2     | 0   | 0  | S03    |
| .....uuuugcgguugguagcggg.....                                                                                    | .....uuuugcgguugguagcggg.....                                                                                    | .....uuuugcgguugguagcggg.....                                                                                    | 1     | 0   | 0  | S03    |
| .....uuuugcgguugguagcggg.....                                                                                    | .....uuuugcgguugguagcggg.....                                                                                    | .....uuuugcgguugguagcggg.....                                                                                    | 1     | 0   | 0  | S03    |
| .....uuuugcgguugguagcggg.....                                                                                    | .....uuuugcgguugguagcggg.....                                                                                    | .....uuuugcgguugguagcggg.....                                                                                    | 1     | 0   | 0  | S03    |
| .....uuuugcgguugguagcggg.....                                                                                    | .....uuuugcgguugguagcggg.....                                                                                    | .....uuuugcgguugguagcggg.....                                                                                    | 1     | 0   | 0  | S03    |
| .....uuuugcgguugguagcggg.....                                                                                    | .....uuuugcgguugguagcggg.....                                                                                    | .....uuuugcgguugguagcggg.....                                                                                    | 1     | 1   | 1  | S03    |
| .....uuuugcgguugguagcggg.....                                                                                    | .....uuuugcgguugguagcggg.....                                                                                    | .....uuuugcgguugguagcggg.....                                                                                    | 1     | 0   | 0  | S03    |
| .....uuuugcgguugguagcggg.....                                                                                    | .....uuuugcgguugguagcggg.....                                                                                    | .....uuuugcgguugguagcggg.....                                                                                    | 1     | 0   | 0  | S03    |
| .....uuuugcgguugguagcggg.....                                                                                    | .....uuuugcgguugguagcggg.....                                                                                    | .....uuuugcgguugguagcggg.....                                                                                    | 2     | 0   | 0  | S03    |
| .....uuuugcgguugguagcggg.....                                                                                    | .....uuuugcgguugguagcggg.....                                                                                    | .....uuuugcgguugguagcggg.....                                                                                    | 3     | 0   | 0  | S03    |
| .....uuuugcgguugguagcggg.....                                                                                    | .....uuuugcgguugguagcggg.....                                                                                    | .....uuuugcgguugguagcggg.....                                                                                    | 4     | 0   | 0  | S03    |
| .....uuuugcgguugguagcggg.....                                                                                    | .....uuuugcgguugguagcggg.....                                                                                    | .....uuuugcgguugguagcggg.....                                                                                    | 1     | 1   | 1  | S03    |
| .....uuuugcgguugguagcggg.....                                                                                    | .....uuuugcgguugguagcggg.....                                                                                    | .....uuuugcgguugguagcggg.....                                                                                    | 1     | 0   | 0  | S03    |
| .....uuuugcgguugguagcggg.....                                                                                    | .....uuuugcgguugguagcggg.....                                                                                    | .....uuuugcgguugguagcggg.....                                                                                    | 1     | 1   | 1  | S03    |
| .....uuuugcgguugguagcggg.....                                                                                    | .....uuuugcgguugguagcggg.....                                                                                    | .....uuuugcgguugguagcggg.....                                                                                    | 42    | 0   | 0  | S03    |
| .....uuuugcgguugguagcggg.....                                                                                    | .....uuuugcgguugguagcggg.....                                                                                    | .....uuuugcgguugguagcggg.....                                                                                    | 3     | 1   | 1  | S03    |
| .....uuuugcgguugguagcggg.....                                                                                    | .....uuuugcgguugguagcggg.....                                                                                    | .....uuuugcgguugguagcggg.....                                                                                    | 1     | 1   | 1  | S03    |
| .....uuuugcgguugguagcggg.....                                                                                    | .....uuuugcgguugguagcggg.....                                                                                    | .....uuuugcgguugguagcggg.....                                                                                    | 1     | 0   | 0  | S03    |
| .....uuuugcgguugguagcggg.....                                                                                    | .....uuuugcgguugguagcggg.....                                                                                    | .....uuuugcgguugguagcggg.....                                                                                    | 2     | 0   | 0  | S03    |
| .....uuuugcgguugguagcggg.....                                                                                    | .....uuuugcgguugguagcggg.....                                                                                    | .....uuuugcgguugguagcggg.....                                                                                    | 3     | 0   | 0  | S03    |
| .....uuuugcgguugguagcggg.....                                                                                    | .....uuuugcgguugguagcggg.....                                                                                    | .....uuuugcgguugguagcggg.....                                                                                    | 4     | 0   | 0  | S03    |
| .....uuuugcgguugguagcggg.....                                                                                    | .....uuuugcgguugguagcggg.....                                                                                    | .....uuuugcgguugguagcggg.....                                                                                    | 8     | 0   | 0  | S03    |
| .....uuuugcgguugguagcggg.....                                                                                    | .....uuuugcgguugguagcggg.....                                                                                    | .....uuuugcgguugguagcggg.....                                                                                    | 2     | 0   | 0  | S03    |
| .....uuuugcgguugguagcggg.....                                                                                    | .....uuuugcgguugguagcggg.....                                                                                    | .....uuuugcgguugguagcggg.....                                                                                    | 4     | 0   | 0  | S03    |
| .....uuuugcgguugguagcggg.....                                                                                    | .....uuuugcgguugguagcggg.....                                                                                    | .....uuuugcgguugguagcggg.....                                                                                    | 1     | 1   | 1  | S03    |
| .....uuuugcgguugguagcggg.....                                                                                    | .....uuuugcgguugguagcggg.....                                                                                    | .....uuuugcgguugguagcggg.....                                                                                    | 5     | 0   | 0  | S03    |
| .....uuuugcgguugguagcggg.....                                                                                    | .....uuuugcgguugguagcggg.....                                                                                    | .....uuuugcgguugguagcggg.....                                                                                    | 1     | 1   | 1  | S03    |
| .....uuuugcgguugguagcggg.....                                                                                    | .....uuuugcgguugguagcggg.....                                                                                    | .....uuuugcgguugguagcggg.....                                                                                    | 2     | 0   | 0  | S03    |
| .....uuuugcgguugguagcggg.....                                                                                    | .....uuuugcgguugguagcggg.....                                                                                    | .....uuuugcgguugguagcggg.....                                                                                    | 2     | 1   | 1  | S03    |
| .....uuuugcgguugguagcggg.....                                                                                    | .....uuuugcgguugguagcggg.....                                                                                    | .....uuuugcgguugguagcggg.....                                                                                    | 1     | 1   | 1  | S03    |
| .....uuuugcgguugguagcggg.....                                                                                    | .....uuuugcgguugguagcggg.....                                                                                    | .....uuuugcgguugguagcggg.....                                                                                    | 26    | 0   | 0  | S03    |

Star

Mature

|                                                 |                     |              |       |       |           |       |    |   |     |
|-------------------------------------------------|---------------------|--------------|-------|-------|-----------|-------|----|---|-----|
| caagagucuaaaugaucuaauucucuuuuggggucugacuggucucu | cgcuaccaccgcaaacgca | gauuuugcgguu | ggua  | gagc  | gguuucgaa | cauca |    |   |     |
| .....                                           | .....               | .....        | ..... | ..... | .....     | ..... | 1  | 0 | S03 |
| .....                                           | .....               | .....        | ..... | ..... | .....     | ..... | 1  | 0 | S03 |
| .....                                           | .....               | .....        | ..... | ..... | .....     | ..... | 2  | 0 | S03 |
| .....                                           | .....               | .....        | ..... | ..... | .....     | ..... | 1  | 0 | S03 |
| .....                                           | .....               | .....        | ..... | ..... | .....     | ..... | 1  | 0 | S03 |
| .....                                           | .....               | .....        | ..... | ..... | .....     | ..... | 1  | 1 | S03 |
| .....                                           | .....               | .....        | ..... | ..... | .....     | ..... | 1  | 0 | S03 |
| .....                                           | .....               | .....        | ..... | ..... | .....     | ..... | 1  | 0 | S04 |
| .....                                           | .....               | .....        | ..... | ..... | .....     | ..... | 2  | 0 | S04 |
| .....                                           | .....               | .....        | ..... | ..... | .....     | ..... | 1  | 0 | S04 |
| .....                                           | .....               | .....        | ..... | ..... | .....     | ..... | 1  | 0 | S04 |
| .....                                           | .....               | .....        | ..... | ..... | .....     | ..... | 1  | 0 | S04 |
| .....                                           | .....               | .....        | ..... | ..... | .....     | ..... | 1  | 0 | S04 |
| .....                                           | .....               | .....        | ..... | ..... | .....     | ..... | 1  | 0 | S04 |
| .....                                           | .....               | .....        | ..... | ..... | .....     | ..... | 3  | 0 | S04 |
| .....                                           | .....               | .....        | ..... | ..... | .....     | ..... | 17 | 0 | S04 |
| .....                                           | .....               | .....        | ..... | ..... | .....     | ..... | 1  | 1 | S04 |
| .....                                           | .....               | .....        | ..... | ..... | .....     | ..... | 1  | 1 | S04 |
| .....                                           | .....               | .....        | ..... | ..... | .....     | ..... | 1  | 0 | S04 |
| .....                                           | .....               | .....        | ..... | ..... | .....     | ..... | 2  | 0 | S04 |
| .....                                           | .....               | .....        | ..... | ..... | .....     | ..... | 2  | 0 | S04 |
| .....                                           | .....               | .....        | ..... | ..... | .....     | ..... | 2  | 0 | S04 |
| .....                                           | .....               | .....        | ..... | ..... | .....     | ..... | 3  | 0 | S04 |
| .....                                           | .....               | .....        | ..... | ..... | .....     | ..... | 7  | 0 | S04 |
| .....                                           | .....               | .....        | ..... | ..... | .....     | ..... | 1  | 0 | S04 |
| .....                                           | .....               | .....        | ..... | ..... | .....     | ..... | 6  | 0 | S04 |
| .....                                           | .....               | .....        | ..... | ..... | .....     | ..... | 1  | 1 | S04 |
| .....                                           | .....               | .....        | ..... | ..... | .....     | ..... | 1  | 0 | S04 |
| .....                                           | .....               | .....        | ..... | ..... | .....     | ..... | 1  | 1 | S04 |
| .....                                           | .....               | .....        | ..... | ..... | .....     | ..... | 1  | 0 | S04 |
| .....                                           | .....               | .....        | ..... | ..... | .....     | ..... | 1  | 1 | S04 |
| .....                                           | .....               | .....        | ..... | ..... | .....     | ..... | 1  | 0 | S04 |
| .....                                           | .....               | .....        | ..... | ..... | .....     | ..... | 1  | 0 | S04 |
| .....                                           | .....               | .....        | ..... | ..... | .....     | ..... | 1  | 0 | S04 |
| .....                                           | .....               | .....        | ..... | ..... | .....     | ..... | 1  | 0 | S04 |
| .....                                           | .....               | .....        | ..... | ..... | .....     | ..... | 1  | 1 | S04 |
| .....                                           | .....               | .....        | ..... | ..... | .....     | ..... | 1  | 0 | S04 |
| .....                                           | .....               | .....        | ..... | ..... | .....     | ..... | 1  | 0 | S04 |
| .....                                           | .....               | .....        | ..... | ..... | .....     | ..... | 1  | 1 | S04 |
| .....                                           | .....               | .....        | ..... | ..... | .....     | ..... | 1  | 0 | S04 |



Star

Mature

|                                                                                                            |    |   |     |
|------------------------------------------------------------------------------------------------------------|----|---|-----|
| ggaaUUUUCcGgAaUgUCCgAggAAaUCCaAcGgAuaUUuaAgUGucAgUcGgAaUUUcCUGgAaUUUUuaUUuaaCCggGcaAaccAgCCGccAAaUUUUCgGaa |    |   |     |
| .....aagugUCgucGgaaUUUcCUGg.....                                                                           | 1  | 1 | S04 |
| .....aagUGcagucGgaaUUUcCUGgA.....                                                                          | 1  | 1 | S04 |
| .....agUGcagucGgaaUUUcCUGg.....                                                                            | 1  | 1 | S04 |
| .....NucGgaaUUUcCUGgAaUU.....                                                                              | 1  | 1 | S04 |
| .....ucGgaaUUUcCUGgAaU.....                                                                                | 11 | 0 | S04 |
| .....ucGgaaUUUcCUGgAaUA.....                                                                               | 7  | 0 | S04 |
| .....ucGgaaUUUcCUGgAaUaU.....                                                                              | 4  | 0 | S04 |
| .....ucGgaaUUUcCUGgAaUaUU.....                                                                             | 32 | 0 | S04 |
| .....NcGgaaUUUcCUGgAaUaUU.....                                                                             | 1  | 1 | S04 |
| .....ucGgaaUCuccUGgAaUaUU.....                                                                             | 1  | 1 | S04 |
| .....ucGgaaUUUcCUGgAaUaUC.....                                                                             | 1  | 1 | S04 |
| .....ucGgaaCUuccUGgAaUaUU.....                                                                             | 1  | 1 | S04 |
| .....ucGgaaUUUcCUGgAaUaUUU.....                                                                            | 3  | 0 | S04 |
| .....ucGgaaUUUcCUGgAaUaUUgU.....                                                                           | 1  | 1 | S04 |
| .....ucGgaaUUUcCUGgAaUaUUUU.....                                                                           | 2  | 0 | S04 |
| .....cgGaaUUUcCUGgAaUA.....                                                                                | 2  | 0 | S04 |
| .....cgGaaUUUcCUGgAaUaU.....                                                                               | 2  | 0 | S04 |
| .....cgGaaUUUcCUGgAaUaUU.....                                                                              | 6  | 0 | S04 |
| .....cgGaaUUUcCUGgAaUaUUU.....                                                                             | 3  | 0 | S04 |
| .....cgGaaUUuccUGgAaUaUUU.....                                                                             | 1  | 1 | S04 |
| .....aUUUUaUUuaaCCggGcaAaccA.....                                                                          | 1  | 0 | S04 |
| .....aUUuaaCCggGcaAaccAgC.....                                                                             | 1  | 0 | S04 |





**Star**

**Mature**

uaaca**caacgucagauuggggua**cgggugagaagcuuagggcuuugguc**ugacgggacgugu**uagcaggcagacuggccuaguuacgaauguacuuuucgugaccuuggcc  
.....cagacuggccuaguuacgaaug.....

1

0

S04





# Mature

# Star

aaaccuaggguccgacggauacuaccgucggaauccgucggaauccgucggaauuuuacaaauuuuocgcgaaauuuugcccgguaaaaugaaaauauuccgaggaaauuccg

|                                    |     |   |     |
|------------------------------------|-----|---|-----|
| .....auccgucggaauucuaauuC.....     | 1   | 1 | S03 |
| .....auccgucggaauucuaauu.....      | 6   | 0 | S03 |
| .....auccgucAgaauucuaauu.....      | 1   | 1 | S03 |
| .....auccgucggaauucuaauuU.....     | 11  | 1 | S03 |
| .....auccgucggaauCcuauuuc.....     | 1   | 1 | S03 |
| .....auccgucggaauucuaauu.....      | 204 | 0 | S03 |
| .....auccgCcggaauucuaauu.....      | 1   | 1 | S03 |
| .....auccgucggaGuucuaauu.....      | 1   | 1 | S03 |
| .....auccgucggaauucUauuuc.....     | 1   | 1 | S03 |
| .....Nuccgucggaauucuaauu.....      | 2   | 1 | S03 |
| .....Uuuccgucggaauucuaauu.....     | 2   | 1 | S03 |
| .....auccgGcggaaauucuaauu.....     | 2   | 1 | S03 |
| .....auAccgucggaauucuaauu.....     | 1   | 1 | S03 |
| .....auccgucggGuucuaauu.....       | 1   | 1 | S03 |
| .....auccguUggaauucuaauu.....      | 1   | 1 | S03 |
| .....auccgucggaauuAuaauu.....      | 2   | 1 | S03 |
| .....auccgucggaauucuaauuA.....     | 2   | 1 | S03 |
| .....auccgucggaauucuaauuU.....     | 10  | 1 | S03 |
| .....auccgucggaauucuaaCuca.....    | 1   | 1 | S03 |
| .....auccgucCgaaauucuaauu.....     | 1   | 1 | S03 |
| .....auccgucggaauucuaauuU.....     | 1   | 1 | S03 |
| .....auccgucggaauucuaauuca.....    | 27  | 0 | S03 |
| .....auccgucggaauucuaauuCG.....    | 7   | 1 | S03 |
| .....auccgucggaauucuaauuU.....     | 2   | 1 | S03 |
| .....auccgucAgaauucuaauuca.....    | 2   | 1 | S03 |
| .....auccgucggaauucuaauucaG.....   | 1   | 1 | S03 |
| .....auccgCcggaauucuaauuca.....    | 1   | 1 | S03 |
| .....auccgucggaauucuaauuca.....    | 4   | 0 | S03 |
| .....auccgucggaauucuaauucauu.....  | 1   | 0 | S03 |
| .....Uuuccgucggaauucuaauucauu..... | 1   | 1 | S03 |
| .....uuccgucggaauucuaUuu.....      | 1   | 1 | S03 |
| .....uuccgucggaauucuaauu.....      | 2   | 0 | S03 |
| .....uuccgucggaauucuaauuC.....     | 2   | 1 | S03 |
| .....uuccgucggaauucuaauuu.....     | 2   | 0 | S03 |
| .....uuccgucggaauucuaUuuu.....     | 1   | 1 | S03 |
| .....uucAgucggaauucuaauu.....      | 1   | 1 | S03 |
| .....Cuuccgucggaauucuaauu.....     | 1   | 1 | S03 |
| .....uuccgucggCauucuaauu.....      | 1   | 1 | S03 |
| .....uuccgucggaauucuaauuU.....     | 2   | 1 | S03 |
| .....uuccgucAgaauucuaauu.....      | 2   | 1 | S03 |
| .....uuccgucggaauucuaauu.....      | 59  | 0 | S03 |
| .....Guuccgucggaauucuaauu.....     | 2   | 1 | S03 |
| .....uuccgucggaauucGauuca.....     | 1   | 1 | S03 |
| .....uuccgucggaauucuaauuU.....     | 3   | 1 | S03 |
| .....Cuuccgucggaauucuaauuca.....   | 1   | 1 | S03 |
| .....uuccgucggaauucuaauuCG.....    | 4   | 1 | S03 |
| .....uuccgucggaauucuaauuca.....    | 40  | 0 | S03 |
| .....uuccgCcggaauucuaauuca.....    | 1   | 1 | S03 |
| .....uuccgucggaauucuaauucGa.....   | 1   | 1 | S03 |
| .....uuccgucggaauucuaauucaU.....   | 2   | 1 | S03 |
| .....uuccgucggaauucuaauuca.....    | 3   | 0 | S03 |
| .....uuccgGcggaaauucuaauucaau..... | 1   | 1 | S03 |
| .....uuccgucggaGuucuaauucaau.....  | 1   | 1 | S03 |
| .....uuccgucggaauucuaauCucaau..... | 1   | 1 | S03 |
| .....uAccgucggaauucuaauucaau.....  | 1   | 1 | S03 |
| .....uuccgucAgaauucuaauucaau.....  | 4   | 1 | S03 |
| .....uuccgucggaauucuaauucaau.....  | 100 | 0 | S03 |
| .....uuccgucggaauucuaauucaAG.....  | 1   | 1 | S03 |
| .....uuccgucggaauuAuaauucaau.....  | 1   | 1 | S03 |
| .....uuccgucggaauucuaauucaAC.....  | 11  | 1 | S03 |
| .....uuccgucggGuucuaauucaau.....   | 2   | 1 | S03 |
| .....uuccgucgAaauucuaauucaau.....  | 2   | 1 | S03 |
| .....uCCgucggaauucuaauucaau.....   | 1   | 1 | S03 |
| .....uuccgucggaauucuaauucaA.....   | 1   | 1 | S03 |
| .....uuccgucggaauucuaauucaG.....   | 1   | 1 | S03 |
| .....uuccgucggaauucuaauucaauA..... | 1   | 1 | S03 |
| .....uuccgucggaauucuaauucaCu.....  | 1   | 1 | S03 |
| .....uuccgucggaauucuaauucaauG..... | 1   | 1 | S03 |
| .....uuccgucggaauucuaauucaau.....  | 7   | 0 | S03 |
| .....uuccgucAgaauucuaauucaau.....  | 1   | 1 | S03 |





Mature

Star

|                                                                                                                       |    |   |     |
|-----------------------------------------------------------------------------------------------------------------------|----|---|-----|
| aaaccuagggucgacggaucuauccgucgga <u>auccgucggaauccgucggaauuucuaauuuuocgcgaaauuuugcccgguaaaaugaaaauauuccgaggaauuccg</u> |    |   |     |
| ..... auccgucggaauucuaauuucauuu.....                                                                                  | 2  | 0 | S04 |
| ..... uccgucggaauucuaauuu.....                                                                                        | 6  | 0 | S04 |
| ..... uccgucggaauucuaauuu.....                                                                                        | 3  | 0 | S04 |
| ..... uccgucAgaauucuaauuu.....                                                                                        | 3  | 1 | S04 |
| ..... uAccgucggaauucuaauuu.....                                                                                       | 1  | 1 | S04 |
| ..... Nucgucggaauucuaauuu.....                                                                                        | 1  | 1 | S04 |
| ..... uccgucggaauucuaauuuG.....                                                                                       | 1  | 1 | S04 |
| ..... uccgucggaauucuaauuuU.....                                                                                       | 3  | 1 | S04 |
| ..... uccgucggaauucuaauuu.....                                                                                        | 70 | 0 | S04 |
| ..... uccgucggaauucGauuu.....                                                                                         | 1  | 1 | S04 |
| ..... uccgucUgaauucuaauuu.....                                                                                        | 1  | 1 | S04 |
| ..... uccgucCgaauucuaauuu.....                                                                                        | 1  | 1 | S04 |
| ..... uccgucggaauucuaauuuca.....                                                                                      | 59 | 0 | S04 |
| ..... uccAucggaauucuaauuuca.....                                                                                      | 1  | 1 | S04 |
| ..... uccgucggaauucuaauuuG.....                                                                                       | 5  | 1 | S04 |
| ..... uccgucggaauucuaauuCu.....                                                                                       | 1  | 1 | S04 |
| ..... uccgucggaauucuaUuuuca.....                                                                                      | 1  | 1 | S04 |
| ..... uccgucggaauucuaauuuU.....                                                                                       | 6  | 1 | S04 |
| ..... uccgAcggaauucuaauuuca.....                                                                                      | 1  | 1 | S04 |
| ..... uccgucAgaauucuaauuuca.....                                                                                      | 1  | 1 | S04 |
| ..... Nucgucggaauucuaauuuca.....                                                                                      | 1  | 1 | S04 |
| ..... uccgucggaauucuaauuuC.....                                                                                       | 2  | 1 | S04 |
| ..... uccgucggGauucuaauuuca.....                                                                                      | 1  | 1 | S04 |
| ..... uuGcgucggaauucuaauuuca.....                                                                                     | 1  | 1 | S04 |
| ..... uucUgucggaauucuaauuuca.....                                                                                     | 1  | 1 | S04 |
| ..... uccgucggaGuucuaauuuca.....                                                                                      | 1  | 1 | S04 |
| ..... uccgucggaauucuaauuuGca.....                                                                                     | 1  | 1 | S04 |
| ..... uccgucUggaauucuaauuuca.....                                                                                     | 1  | 1 | S04 |
| ..... uccgucggaauucuaauuCa.....                                                                                       | 1  | 1 | S04 |
| ..... uccgucggaauucuaauuucaaa.....                                                                                    | 2  | 0 | S04 |
| ..... uccgucCgaauucuaauuucaau.....                                                                                    | 3  | 1 | S04 |
| ..... uccgCcggaauucuaauuucaau.....                                                                                    | 1  | 1 | S04 |
| ..... uccgucggaauucuaauuucaCu.....                                                                                    | 1  | 1 | S04 |
| ..... Guccgucggaauucuaauuucaau.....                                                                                   | 1  | 1 | S04 |
| ..... uccgucggaauucuaauuuAaa.....                                                                                     | 1  | 1 | S04 |
| ..... uccgucggaauucuaauuucaAG.....                                                                                    | 3  | 1 | S04 |
| ..... uccgucggaauucuaauuucaAC.....                                                                                    | 7  | 1 | S04 |
| ..... uccgucggaauuAuaauuucaau.....                                                                                    | 1  | 1 | S04 |
| ..... uccgucggaauucuaauuucaAA.....                                                                                    | 5  | 1 | S04 |
| ..... Nucgucggaauucuaauuucaau.....                                                                                    | 1  | 1 | S04 |
| ..... uccgucAgaauucuaauuucaau.....                                                                                    | 2  | 1 | S04 |
| ..... uccgucggaauucuaauuucaau.....                                                                                    | 71 | 0 | S04 |
| ..... uccgucggaauucuaauuucaauC.....                                                                                   | 5  | 1 | S04 |
| ..... uccgucggaauucuaauuucaauu.....                                                                                   | 13 | 0 | S04 |
| ..... uccgucggaauucuaauuucaauuu.....                                                                                  | 2  | 0 | S04 |
| ..... uccgucggaauucuaauuucaauuC.....                                                                                  | 1  | 1 | S04 |
| ..... uccgucUggaauucuaauuucaauuuu.....                                                                                | 1  | 1 | S04 |
| ..... uccgucggaauucuaauuucaauuuu.....                                                                                 | 1  | 0 | S04 |
| ..... uccgucggaauucuaauuu.....                                                                                        | 1  | 0 | S04 |
| ..... uccgucggaauucuaauuu.....                                                                                        | 1  | 0 | S04 |
| ..... uccgAcggaauucuaauuu.....                                                                                        | 1  | 1 | S04 |
| ..... uccgucggaauucuaauuu.....                                                                                        | 5  | 0 | S04 |
| ..... uccgucggaauucuaauuuU.....                                                                                       | 1  | 1 | S04 |
| ..... uccgucggaauuAuaauuuca.....                                                                                      | 1  | 1 | S04 |
| ..... uccgucggaauucuaauuuC.....                                                                                       | 5  | 1 | S04 |
| ..... ucUgucggaauucuaauuuca.....                                                                                      | 1  | 1 | S04 |
| ..... uccAucggaauucuaauuuca.....                                                                                      | 1  | 1 | S04 |
| ..... uccgucAgaauucuaauuuca.....                                                                                      | 1  | 1 | S04 |
| ..... Cccgucggaauucuaauuuca.....                                                                                      | 1  | 1 | S04 |
| ..... uccgAcggaauucuaauuuca.....                                                                                      | 9  | 1 | S04 |
| ..... uccgucggaauucuaauuuca.....                                                                                      | 35 | 0 | S04 |
| ..... uccgucggaauucuaauuucaaa.....                                                                                    | 1  | 0 | S04 |
| ..... uccgucggaauucuaauuuGau.....                                                                                     | 1  | 1 | S04 |
| ..... uccgucggaauucuaauuucaau.....                                                                                    | 2  | 0 | S04 |
| ..... uccgAcggaauucuaauuucaauu.....                                                                                   | 6  | 1 | S04 |
| ..... uccgucgAaaucuaauuucaauu.....                                                                                    | 1  | 1 | S04 |
| ..... uccgucggaauucuaauuuGauu.....                                                                                    | 2  | 1 | S04 |
| ..... uccgucAgaauucuaauuucaauu.....                                                                                   | 1  | 1 | S04 |
| ..... uccgucggaauucuaauuucaauA.....                                                                                   | 1  | 1 | S04 |
| ..... uccgucggaauuAuaauuucaauu.....                                                                                   | 1  | 1 | S04 |

Mature

Star

|                                   |                                                   |                    |    |   |     |
|-----------------------------------|---------------------------------------------------|--------------------|----|---|-----|
| aaaccuaggguccgacggauacuauccgucgga | auuccgucggaauucuaauuuucgcaaaauuuugcccgguaaaaugaaa | auauuccgaggaauuccg |    |   |     |
| .....                             | .uccgucCgaaauucuaauucaauu.....                    | .....              | 1  | 1 | S04 |
| .....                             | .uccgucggaauucuaaCuucaauu.....                    | .....              | 1  | 1 | S04 |
| .....                             | .uccAucggaauucuaauucaauu.....                     | .....              | 1  | 1 | S04 |
| .....                             | .uccgucggaauucuaauucaauG.....                     | .....              | 2  | 1 | S04 |
| .....                             | .uccgucggaauucuaauucaauC.....                     | .....              | 3  | 1 | S04 |
| .....                             | .uccgucggaauucuaauucaauu.....                     | .....              | 46 | 0 | S04 |
| .....                             | .uccgucggaauucuaauucaauuuu.....                   | .....              | 1  | 0 | S04 |
| .....                             | .uccgucggaauucuaaCuucaauuuu.....                  | .....              | 1  | 1 | S04 |
| .....                             | .ccgucggaauucuaauuuU.....                         | .....              | 1  | 1 | S04 |
| .....                             | .ccgucggaauucuaauuuuc.....                        | .....              | 7  | 0 | S04 |
| .....                             | .ccgucggaauucuaauuuca.....                        | .....              | 23 | 0 | S04 |
| .....                             | .ccgucggaauucuaauuuucG.....                       | .....              | 1  | 1 | S04 |
| .....                             | .ccgucggaauucuaauuuca.....                        | .....              | 2  | 0 | S04 |
| .....                             | .ccgucggaauucuaauuucaU.....                       | .....              | 1  | 1 | S04 |
| .....                             | .ccgucggaauucuaauuucaau.....                      | .....              | 4  | 0 | S04 |
| .....                             | .ccgucggaauucuaauuucaauu.....                     | .....              | 10 | 0 | S04 |
| .....                             | .ccgucAgaaauucuaauucaauu.....                     | .....              | 1  | 1 | S04 |
| .....                             | .ccgucCgaaauucuaauucaauu.....                     | .....              | 1  | 1 | S04 |
| .....                             | .ccgucggaauucuaauucaauuu.....                     | .....              | 2  | 0 | S04 |
| .....                             | .ccgucAgaaucuaauucaauuu.....                      | .....              | 1  | 1 | S04 |
| .....                             | .ccgucggaauucuaauucaauuC.....                     | .....              | 2  | 1 | S04 |
| .....                             | .cgAcggaauucuaauucaauu.....                       | .....              | 1  | 1 | S04 |
| .....                             | .cgucCgaaucuaauucaauuu.....                       | .....              | 1  | 1 | S04 |
| .....                             | .cgucCgaaucuaauucaauuuu.....                      | .....              | 3  | 1 | S04 |
| .....                             | .gucggaauucuaauucaauu.....                        | .....              | 1  | 0 | S04 |
| .....                             | .aaucuaauucaauuuucgcg.....                        | .....              | 1  | 0 | S04 |
| .....                             | .aaucuaauucaauuuucgcUa.....                       | .....              | 1  | 1 | S04 |
| .....                             | .cuaauucaauuuucgcaaaC.....                        | .....              | 1  | 1 | S04 |
| .....                             | .aauuucgcaaaauuuugcccg.....                       | .....              | 2  | 0 | S04 |
| .....                             | .uuuucgcaaaauuuugcccg.....                        | .....              | 1  | 0 | S04 |
| .....                             | .uuuucgcaaaauuuugcccgA.....                       | .....              | 1  | 1 | S04 |
| .....                             | .uuucgcaaaauuuugcccggu.....                       | .....              | 2  | 0 | S04 |
| .....                             | .ucgcaaaauuuugcccggua.....                        | .....              | 2  | 0 | S04 |
| .....                             | .cgcaaaauuuugccUgu.....                           | .....              | 1  | 1 | S04 |
| .....                             | .cgcaaaauuuugcccggua.....                         | .....              | 2  | 0 | S04 |
| .....                             | .Acgaaauuuugcccggu.....                           | .....              | 1  | 1 | S04 |
| .....                             | .cgaaauuuugcccguaaaau.....                        | .....              | 1  | 0 | S04 |
| .....                             | .gaaauuuugcccguaaaaugaa.....                      | .....              | 1  | 0 | S04 |
| .....                             | .Nauuugcccguaaaaugaaa.....                        | .....              | 1  | 1 | S04 |
| .....                             | .uaauugcccguaaaaugaaaau.....                      | .....              | 1  | 0 | S04 |
| .....                             | .uugcccguaaaaugaaaau.....                         | .....              | 1  | 0 | S04 |
| .....                             | .uugcccguaaaaugaaaauuuc.....                      | .....              | 2  | 0 | S04 |
| .....                             | .ugcccguaaaaugaaaauuuc.....                       | .....              | 1  | 0 | S04 |
| .....                             | .auggaaaauuuccgaggaCu.....                        | .....              | 1  | 1 | S04 |
| .....                             | .augaaaauuuccgaggaauuuc.....                      | .....              | 1  | 0 | S04 |
| .....                             | .ugaaaauuuccgaggaauuuccg.....                     | .....              | 1  | 0 | S04 |
| .....                             | .aaauuuccgaggaauuuc.....                          | .....              | 1  | 0 | S04 |
| .....                             | .auauuccgaggaauuuccg.....                         | .....              | 2  | 0 | S04 |



Mature

Star

|                                                                                                            |    |   |     |
|------------------------------------------------------------------------------------------------------------|----|---|-----|
| ucgguaauuaucaagaauauuccgacggaugauauuuccggaauuccgucgguaauuuccgaggaaucaauuuuggguuucccggaaauucccggaaauucccggg | 53 | 0 | S03 |
| .ucggaaauuccgucgguaauuuc                                                                                   | 1  | 0 | S03 |
| .ucggaaauuccgucgguaauuucc                                                                                  | 1  | 0 | S03 |
| .cggaauuccgucgguaaua                                                                                       | 4  | 0 | S03 |
| .cggaauuccgucgguaauu                                                                                       | 9  | 0 | S03 |
| .cggaauuccguGgguaauuuc                                                                                     | 1  | 1 | S03 |
| .cggaauuccgucgguaauuuc                                                                                     | 15 | 0 | S03 |
| .cggaauuccgucgguaauuucc                                                                                    | 2  | 0 | S03 |
| .ggaauuccgucgguaauu                                                                                        | 16 | 0 | S03 |
| .ggaauuccgucgguaauuuc                                                                                      | 4  | 0 | S03 |
| .ggaauuccgucgguaauuuccga                                                                                   | 3  | 0 | S03 |
| .ggaauuccgucgguaauuuccgag                                                                                  | 4  | 0 | S03 |
| .gaaauuccgucgguaauu                                                                                        | 6  | 0 | S03 |
| .gaaauuccgucgguaauuuc                                                                                      | 2  | 0 | S03 |
| .gaaauuccgucgguaauuucc                                                                                     | 10 | 0 | S03 |
| .gaaauuccgucgguaauuuccg                                                                                    | 61 | 0 | S03 |
| .gaaauuccgucgguaauuuccga                                                                                   | 13 | 0 | S03 |
| .gaaauuccgucgguaauuuccgag                                                                                  | 6  | 0 | S03 |
| .aaauuccgucgguaauuuc                                                                                       | 10 | 0 | S03 |
| .aaauuccgucgguaauuucc                                                                                      | 20 | 0 | S03 |
| .aaauuccgucgguaauuuccC                                                                                     | 2  | 1 | S03 |
| .aaauuccgucgguaauuuccg                                                                                     | 30 | 0 | S03 |
| .aaauuccgucgguaauuuccga                                                                                    | 3  | 0 | S03 |
| .aaauuccgucgguaauuuccgag                                                                                   | 9  | 0 | S03 |
| .aaauuccgucgguaauuuccgagg                                                                                  | 1  | 0 | S03 |
| .aaauuccgucgguaauuuccgaggG                                                                                 | 2  | 1 | S03 |
| .aaauuccgucgguaauuuccgagga                                                                                 | 5  | 0 | S03 |
| .auuccgucgguaauuucc                                                                                        | 8  | 0 | S03 |
| .auuccgucgguaauuuccg                                                                                       | 9  | 0 | S03 |
| .auuccgucgguaauuuccga                                                                                      | 1  | 0 | S03 |
| .auuccgucgguaauuuccgag                                                                                     | 1  | 0 | S03 |
| .auuccgucgguaauuuccgagg                                                                                    | 5  | 0 | S03 |
| .uuccgucgguaauuuccg                                                                                        | 1  | 0 | S03 |
| .uuccgucgguaauuuccgag                                                                                      | 1  | 0 | S03 |
| .uccgucgguaauuuccga                                                                                        | 1  | 0 | S03 |
| .uuuuggguuucccggaa                                                                                         | 1  | 0 | S03 |
| .ccucggaauucccggaa                                                                                         | 1  | 0 | S03 |
| .cucggaauucccggaaa                                                                                         | 1  | 0 | S03 |
| .cggaauucccggaaa                                                                                           | 1  | 0 | S03 |
| .ccucggaauucccggg                                                                                          | 1  | 0 | S03 |
| .gguaauuaucaagaauauucUgacgga                                                                               | 1  | 1 | S04 |
| .auaagaauauuccgacgg                                                                                        | 1  | 0 | S04 |
| .aaauuccgacggaugauauuuc                                                                                    | 1  | 0 | S04 |
| .auauuccgacggaugaAuuuucc                                                                                   | 1  | 1 | S04 |
| .auauuccgacggaugaauuucc                                                                                    | 1  | 0 | S04 |
| .ugauuuucccggaauccgu                                                                                       | 1  | 0 | S04 |
| .gauuuucccggaauccg                                                                                         | 1  | 0 | S04 |
| .auuuucccggaauccgu                                                                                         | 1  | 0 | S04 |
| .auuuucccggaauccgucg                                                                                       | 1  | 0 | S04 |
| .auuuucccggaauccgucgg                                                                                      | 1  | 0 | S04 |
| .auuuucccggaaucUgucggua                                                                                    | 1  | 1 | S04 |
| .auuucccggaauccgucgg                                                                                       | 1  | 0 | S04 |
| .uuucccggaauccguc                                                                                          | 1  | 0 | S04 |
| .uuucccggaauccgucgg                                                                                        | 4  | 0 | S04 |
| .uuucccggaauccgucggua                                                                                      | 2  | 0 | S04 |
| .uucccggaauccgucggua                                                                                       | 1  | 0 | S04 |
| .uucccggaauccgucgguaG                                                                                      | 4  | 1 | S04 |
| .uucccggaauccgucggua                                                                                       | 1  | 0 | S04 |
| .uucccggaauccgucgguaau                                                                                     | 1  | 0 | S04 |
| .ucccggaauccgucgg                                                                                          | 1  | 0 | S04 |
| .ucccggaauccgucggua                                                                                        | 1  | 0 | S04 |
| .ucccggaauccgucgguaauu                                                                                     | 4  | 0 | S04 |
| .ucAuccggaauuccgucgguaauu                                                                                  | 1  | 1 | S04 |
| .ccucggaauuccgucgguaauu                                                                                    | 3  | 0 | S04 |
| .ccucggaauuccgucgguaauuuc                                                                                  | 19 | 0 | S04 |
| .cucggaauuccgucggua                                                                                        | 6  | 0 | S04 |
| .cucggaauuccgucggua                                                                                        | 1  | 0 | S04 |
| .cucggaauuccgucgguaau                                                                                      | 3  | 0 | S04 |
| .cucggaauuccgucgguaauu                                                                                     | 60 | 0 | S04 |



Mature

Star

|                                                                                                           |    |   |     |
|-----------------------------------------------------------------------------------------------------------|----|---|-----|
| ucgguuuuaucaagaauuuccgacggaugauuuuccucggaauuccgucgguaauuuuccgaggaaucaauuuuggguuuccucggaauuuccggaauucccggg |    |   |     |
| .....cucggGauuccgucgguaauuu.....                                                                          | 1  | 1 | S04 |
| .....cucggaauuccgucgguaauuu.....                                                                          | 23 | 0 | S04 |
| .....cucggaauuccgucgguaauuuG.....                                                                         | 1  | 1 | S04 |
| .....Nucggaauuccgucgguaauuucc.....                                                                        | 1  | 1 | S04 |
| .....cucggaauuccgucgguaauuucc.....                                                                        | 29 | 0 | S04 |
| .....ucggaauuccgucgguaau.....                                                                             | 2  | 0 | S04 |
| .....ucggaauuccgucgguaau.....                                                                             | 4  | 0 | S04 |
| .....ucggaauuccgucgguaG.....                                                                              | 1  | 1 | S04 |
| .....ucggaauuccgucgguaau.....                                                                             | 2  | 0 | S04 |
| .....ucggaauuccgucgguaauuu.....                                                                           | 30 | 0 | S04 |
| .....Ncggaauuccgucgguaauuu.....                                                                           | 1  | 1 | S04 |
| .....ucggaauuccgucgguaauuu.....                                                                           | 85 | 0 | S04 |
| .....ucggaauuccgGcgguaauuu.....                                                                           | 1  | 1 | S04 |
| .....cggaauuccgucgguaau.....                                                                              | 1  | 0 | S04 |
| .....cggaauuccgucgguaau.....                                                                              | 1  | 0 | S04 |
| .....cggaauuccgucgguaauuu.....                                                                            | 8  | 0 | S04 |
| .....cggaauuccgucgguaauuuG.....                                                                           | 1  | 1 | S04 |
| .....cggaauuccgucgguaauuu.....                                                                            | 23 | 0 | S04 |
| .....cggaauuccgucgguaauuucc.....                                                                          | 3  | 0 | S04 |
| .....cggaauuccgucgguaauuuuccg.....                                                                        | 1  | 0 | S04 |
| .....cggaauuccgucgguaauuuuccC.....                                                                        | 1  | 1 | S04 |
| .....ggaauuccgucgguaau.....                                                                               | 1  | 0 | S04 |
| .....ggaauuccgucgguaauuu.....                                                                             | 13 | 0 | S04 |
| .....ggaauuccgucgguaauuu.....                                                                             | 5  | 0 | S04 |
| .....ggaauuccgucgguaauuuuccg.....                                                                         | 1  | 0 | S04 |
| .....ggaauuccgucgguaauuuuccga.....                                                                        | 2  | 0 | S04 |
| .....ggaauuccgucgguaauuuuccgag.....                                                                       | 9  | 0 | S04 |
| .....gaaauuccgucgguaauuu.....                                                                             | 1  | 0 | S04 |
| .....gaaauuccgucgguaauuu.....                                                                             | 9  | 0 | S04 |
| .....gaaauuccgucgguaauuuucc.....                                                                          | 13 | 0 | S04 |
| .....gUauuccgucgguaauuuuccg.....                                                                          | 1  | 1 | S04 |
| .....gaaauuccgucgguaauuuuccg.....                                                                         | 74 | 0 | S04 |
| .....gaaauuccgucgguaauuuuccga.....                                                                        | 10 | 0 | S04 |
| .....gaaauuccgucgguaauuuuccgag.....                                                                       | 4  | 0 | S04 |
| .....gaaauuccgucgguaauuuuccgagg.....                                                                      | 1  | 0 | S04 |
| .....aaauuccgucgguaauuu.....                                                                              | 2  | 0 | S04 |
| .....aaauuccgucgguaauuu.....                                                                              | 16 | 0 | S04 |
| .....Nauuccgucgguaauuuuccg.....                                                                           | 1  | 1 | S04 |
| .....aaauuccgGcgguaauuuuccg.....                                                                          | 1  | 1 | S04 |
| .....aaauuccgucgguaauuuuccg.....                                                                          | 21 | 0 | S04 |
| .....aaauuccgucgguaauuuuccC.....                                                                          | 1  | 1 | S04 |
| .....aaauuccgucgguaauuuuccga.....                                                                         | 8  | 0 | S04 |
| .....aaauuccgucgguaauuuuccgag.....                                                                        | 3  | 0 | S04 |
| .....aaauuccgucgguaauuuuccgagg.....                                                                       | 2  | 0 | S04 |
| .....aaauuccgucgguaauuuuccgagga.....                                                                      | 8  | 0 | S04 |
| .....auucGgucgguaauuuucc.....                                                                             | 1  | 1 | S04 |
| .....auuccgucgguaauuuucc.....                                                                             | 9  | 0 | S04 |
| .....auuccgucgguaauuuuccg.....                                                                            | 12 | 0 | S04 |
| .....auuccgucgguaauuuuccgC.....                                                                           | 1  | 1 | S04 |
| .....auuccgucgguaauuuuccgag.....                                                                          | 3  | 0 | S04 |
| .....auuccgucgguaauuuuccgagg.....                                                                         | 11 | 0 | S04 |
| .....uuccgucgguaauuuuccg.....                                                                             | 2  | 0 | S04 |
| .....uuccgucgguaauuuuccgag.....                                                                           | 1  | 0 | S04 |
| .....uccgucgguaauuuuccga.....                                                                             | 1  | 0 | S04 |
| .....ucaauuuuggguuucccggaa.....                                                                           | 1  | 0 | S04 |
| .....uuuggguuucccggaa.....                                                                                | 1  | 0 | S04 |
| .....uuggguuucccggaaucuccg.....                                                                           | 1  | 1 | S04 |
| .....guuucccggaaauucccggG.....                                                                            | 1  | 1 | S04 |
| .....ccucggaauauucccggaa.....                                                                             | 1  | 0 | S04 |
| .....ucggaauauucccggaa.....                                                                               | 1  | 0 | S04 |
| .....ucggaauauucccggaaauuc.....                                                                           | 1  | 0 | S04 |
| .....ucggaauauucccggaaauuGcuc.....                                                                        | 1  | 1 | S04 |
| .....aaauucccggaaauucccC.....                                                                             | 1  | 1 | S04 |
| .....ucccggaaauucccggg.....                                                                               | 1  | 0 | S04 |

Provisional ID : chrCnn\_random\_3335482  
 Score total : 0.9  
 Score for star read(s) : -1.3  
 Score for read counts : 0  
 Score for mfe : 2.2  
 Score for randfold : 0  
 Score for cons. seed :  
 Total read count : 998  
 Mature read count : 704  
 Loop read count : 288  
 Star read count : 6

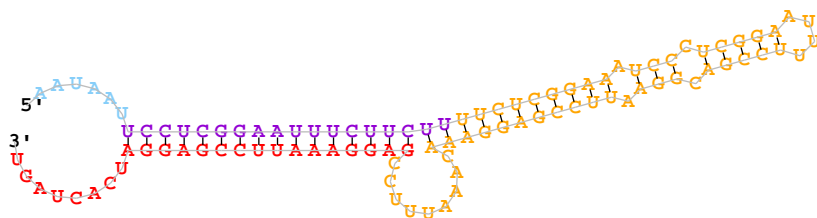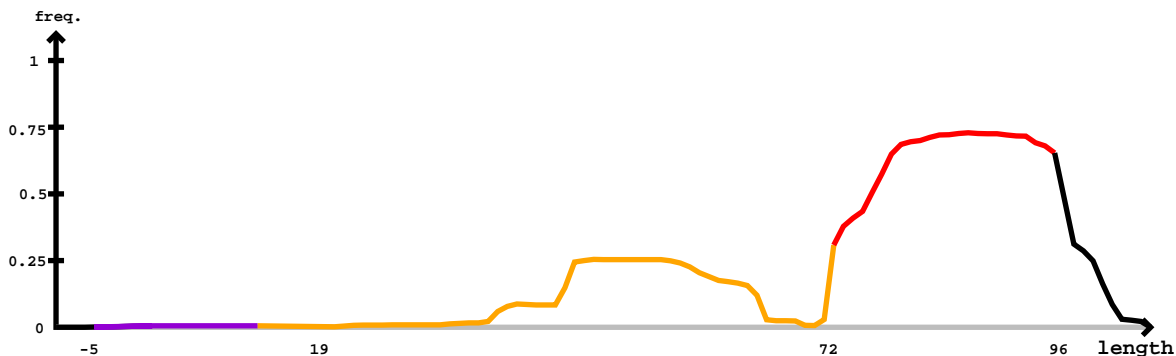

**Star**

**Mature**

| 5' -                                                                                                          | 3'  | obs   | mm | sample |
|---------------------------------------------------------------------------------------------------------------|-----|-------|----|--------|
| gaaaauuuccuggaauuucuuuuuucucggaaaucuccuggaauuuucgcggaauuccgaggaacaaaauuccgaggaauuccgaggaucacuguuugucggaa      | -3' | reads | mm | sample |
| gaaaauuuccuggaauuucuuuuuucucggaaaucuccuggaauuuucgcggaauuccgaggaacaaaauuccgaggaauuccgaggaucacuguuugucggaa      | exp |       |    |        |
| .....(((((((((((((((((((((((((((((((((((((((((((((((((((((((((((((((((((((((((((((((((((((((((((((((((((((((( |     |       |    |        |
| ..aauaaAuccuggaauuucuuuuuucucggaaaucuccuggaauuuucgcggaauuccgaggaacaaaauuccgaggaauuccgaggaucacuguuugucggaa     |     | 1     | 1  | S03    |
| .....uccuggaauuucuuuuuucucggaaaucuccuggaauuuucgcggaauuccgaggaacaaaauuccgaggaauuccgaggaucacuguuugucggaa        |     | 1     | 0  | S03    |
| .....cuucuuuucgcggaauuccuc                                                                                    |     | 1     | 0  | S03    |
| .....cucggaaaucuccuggaau                                                                                      |     | 1     | 0  | S03    |
| .....cucggaaaucuccuggaUuu                                                                                     |     | 1     | 1  | S03    |
| .....ucggaaaucuccuggaauuuu                                                                                    |     | 1     | 0  | S03    |
| .....cggaauuccuggaauuu                                                                                        |     | 1     | 0  | S03    |
| .....cucggaaaauuuccgcggaauucA                                                                                 |     | 1     | 1  | S03    |
| .....cucggaaaauuuccgcggaauucc                                                                                 |     | 1     | 0  | S03    |
| .....cucggaaaauuuccgcggaauucG                                                                                 |     | 1     | 1  | S03    |
| .....ucggaaaauuuccgcggaauuc                                                                                   |     | 1     | 0  | S03    |
| .....gaaaauuccgcggaauuccgagC                                                                                  |     | 1     | 1  | S03    |
| .....aauuuccgcggaauucc                                                                                        |     | 2     | 0  | S03    |
| .....aauuuccgcggaauuccg                                                                                       |     | 1     | 0  | S03    |
| .....aauuuccgcggaauuccga                                                                                      |     | 1     | 0  | S03    |
| .....aauuuccgcggaauucc                                                                                        |     | 1     | 0  | S03    |
| .....auGuuccgcggaauuccg                                                                                       |     | 1     | 1  | S03    |
| .....aauuuccgcggaauuccg                                                                                       |     | 1     | 0  | S03    |
| .....aauuuccgcggaauuccga                                                                                      |     | 3     | 0  | S03    |
| .....aauuuccgcggaauuccgag                                                                                     |     | 1     | 0  | S03    |
| .....aauuuccgcggaauuccgagC                                                                                    |     | 2     | 1  | S03    |
| .....aauuuccgcggaauuccgagg                                                                                    |     | 3     | 0  | S03    |
| .....uuuuccgcggaauuccCa                                                                                       |     | 1     | 1  | S03    |
| .....uuuuccgcggaauuccgag                                                                                      |     | 1     | 0  | S03    |
| .....uuuuccgcggaauuccga                                                                                       |     | 1     | 0  | S03    |
| .....cgcggaauuccgagga                                                                                         |     | 1     | 0  | S03    |
| .....cgacggaauuccgagga                                                                                        |     | 3     | 0  | S03    |
| .....cgacggaauuccgagga                                                                                        |     | 1     | 0  | S03    |
| .....cgacggaauuccgaggaaac                                                                                     |     | 8     | 0  | S03    |
| .....ucggaauuccgaggaaac                                                                                       |     | 13    | 0  | S03    |
| .....cgacggaauuccgaggaacaaa                                                                                   |     | 1     | 0  | S03    |
| .....gacggaauuccgagga                                                                                         |     | 2     | 0  | S03    |
| .....gacggaauuccgaggaaac                                                                                      |     | 7     | 0  | S03    |

Star

Mature

| Sequence                                                                                                       | Star | Mature | Category |
|----------------------------------------------------------------------------------------------------------------|------|--------|----------|
| gaaauuuucccggaauuucuuuuuuucucgggaaauccucggaauuuucgacgggaaauccgaggaacaaauuuuccgaggaauuuccgaggaucacuaguuugucggaa |      |        |          |
| .....gacggaauuccgaggaaca.....                                                                                  | 14   | 0      | S03      |
| .....gacggaauuccgaggaacaa.....                                                                                 | 1    | 0      | S03      |
| .....gacggaauuccgaggaacaaau.....                                                                               | 6    | 0      | S03      |
| .....acggaauuccgaggaac.....                                                                                    | 1    | 0      | S03      |
| .....cggaauuccgaggaaca.....                                                                                    | 1    | 0      | S03      |
| .....cggaauuccgGggaaca.....                                                                                    | 1    | 1      | S03      |
| .....cggaauuccgaggaacaa.....                                                                                   | 1    | 0      | S03      |
| .....cggaauuccgaggaacaaauC.....                                                                                | 1    | 1      | S03      |
| .....aauuuccgaggaauuccgagg.....                                                                                | 1    | 0      | S03      |
| .....auuccgaggaauuccgagg.....                                                                                  | 1    | 0      | S03      |
| .....Guuccgaggaauuccgagg.....                                                                                  | 1    | 1      | S03      |
| .....uuccgaggaauuccgag.....                                                                                    | 1    | 0      | S03      |
| .....cgaggaauuccgaggaucacu.....                                                                                | 1    | 0      | S03      |
| .....cgaggaauuccgaggaucacua.....                                                                               | 2    | 0      | S03      |
| .....cgaggaauuccgaggaucacuag.....                                                                              | 5    | 0      | S03      |
| .....gaggaauuccgaggauc.....                                                                                    | 1    | 0      | S03      |
| .....gaggaauuccUgaggauca.....                                                                                  | 1    | 1      | S03      |
| .....gaggaauuccUgaggaucac.....                                                                                 | 1    | 1      | S03      |
| .....gaggaauuccgaggaucacu.....                                                                                 | 8    | 0      | S03      |
| .....gaggaauuccgaggaucacC.....                                                                                 | 1    | 1      | S03      |
| .....gaggaauuccgaggaucacG.....                                                                                 | 1    | 1      | S03      |
| .....gaggaauuccgaggaucacua.....                                                                                | 1    | 0      | S03      |
| .....gaggaauuccUgaggaucacua.....                                                                               | 1    | 1      | S03      |
| .....gaggaauuccgaggaucacuag.....                                                                               | 5    | 0      | S03      |
| .....gaggaauuccgaggaucacuagA.....                                                                              | 2    | 1      | S03      |
| .....gaggaauuccgaggaucacuagu.....                                                                              | 106  | 0      | S03      |
| .....gaggaauuccgaggaucacuagG.....                                                                              | 1    | 1      | S03      |
| .....gaggaauuccgaggaucacuagC.....                                                                              | 11   | 1      | S03      |
| .....Aaggaauuccgaggaucacuagu.....                                                                              | 3    | 1      | S03      |
| .....gaggaauuccgaggaucGcuagu.....                                                                              | 1    | 1      | S03      |
| .....gaggaauuccCaggaucacuagu.....                                                                              | 1    | 1      | S03      |
| .....aggaauuccgaggaucacA.....                                                                                  | 1    | 1      | S03      |
| .....aggaauuccgaggaucacua.....                                                                                 | 1    | 0      | S03      |
| .....aggaauuccgaggaucacuag.....                                                                                | 1    | 0      | S03      |
| .....aggaauuccgaggaucacuagu.....                                                                               | 5    | 0      | S03      |
| .....aggaauuccgaggaucacuagC.....                                                                               | 1    | 1      | S03      |
| .....aggaauuccUgaggaucacuaguu.....                                                                             | 1    | 1      | S03      |
| .....aggaauuccgaggaucacuaguC.....                                                                              | 1    | 1      | S03      |
| .....aggaauuccgaggaucacuaguu.....                                                                              | 27   | 0      | S03      |
| .....aggaauuccgaggaucacuaguuA.....                                                                             | 1    | 1      | S03      |
| .....aggaauuccgaggaucacuaguuu.....                                                                             | 1    | 0      | S03      |
| .....ggaauuccgaggaucacuagu.....                                                                                | 1    | 0      | S03      |
| .....ggaauuccgaggaucacuagC.....                                                                                | 1    | 1      | S03      |
| .....ggaauuccgaggaucacuaguu.....                                                                               | 5    | 0      | S03      |
| .....ggaauuccgaggaucacuaguC.....                                                                               | 1    | 1      | S03      |
| .....Ugaaauuccgaggaucacuaguuu.....                                                                             | 1    | 1      | S03      |
| .....ggaauuccgaggaucacuaguuu.....                                                                              | 6    | 0      | S03      |
| .....gaaauuccgaggaucacuagu.....                                                                                | 1    | 0      | S03      |
| .....gaaauuccgaggaucacuaguu.....                                                                               | 2    | 0      | S03      |
| .....gaaauuccgaggaucacuaguC.....                                                                               | 1    | 1      | S03      |
| .....gaaauuccgaggaucacuaguuC.....                                                                              | 1    | 1      | S03      |
| .....gaaauuccgaggaucacuaguuu.....                                                                              | 3    | 0      | S03      |
| .....gaaauuccgaggaucacuaguuug.....                                                                             | 5    | 0      | S03      |
| .....aaauuccgaggaucacuaguu.....                                                                                | 2    | 0      | S03      |
| .....aaauuccgaggaucacuaguuu.....                                                                               | 3    | 0      | S03      |
| .....aaauuccgaggaucacuaguuug.....                                                                              | 1    | 0      | S03      |
| .....aaauuccgaggaucacuaguuugu.....                                                                             | 22   | 0      | S03      |
| .....aaauuccgaggaucacuaguuugA.....                                                                             | 3    | 1      | S03      |
| .....aaauuccgaggaucacuaguuugG.....                                                                             | 4    | 1      | S03      |
| .....aaauuccgaggaucacuagGuuguc.....                                                                            | 1    | 1      | S03      |
| .....aaauuccgaggaucacuagC.....                                                                                 | 2    | 1      | S03      |
| .....aaauuccgaggaucacuagu.....                                                                                 | 2    | 0      | S03      |
| .....aaauuccgaggaucacuaguuug.....                                                                              | 8    | 0      | S03      |
| .....aaauuccgaggaucacuaguuugu.....                                                                             | 2    | 0      | S03      |
| .....aaauuccgaggaucacuaguuuguc.....                                                                            | 14   | 0      | S03      |
| .....aaauuccgaggaucacuaguuugA.....                                                                             | 2    | 1      | S03      |
| .....aaauuccgaggaucacuaguuugucg.....                                                                           | 1    | 0      | S03      |
| .....auuccgaggaucacuagu.....                                                                                   | 1    | 0      | S03      |
| .....auuccgaggaucacuaguuug.....                                                                                | 1    | 0      | S03      |
| .....auuccgaggaucacuaguuugu.....                                                                               | 10   | 0      | S03      |



Star

Mature

| Sequence                                                                                                      | Star | Mature | Category |
|---------------------------------------------------------------------------------------------------------------|------|--------|----------|
| gaaaauuucccggaauuucuucuuuuucucggaaauccucggaauuuucgacggaauuccgaggaacaaaauuuccgaggaauuuccgaggaucacuaguuugucggaa |      |        |          |
| .....cgacggaauuccgaggaacaa.....                                                                               | 2    | 0      | S04      |
| .....gacggaauuccgaggaaa.....                                                                                  | 5    | 0      | S04      |
| .....gacggaauuccgaggaaac.....                                                                                 | 14   | 0      | S04      |
| .....gacggaauuccgaggaacaa.....                                                                                | 40   | 0      | S04      |
| .....gacggaauuccgaggaacaa.....                                                                                | 4    | 0      | S04      |
| .....gacggaauuccgaggaacaaa.....                                                                               | 1    | 0      | S04      |
| .....gacggaauuccgaggaacaaa.....                                                                               | 10   | 0      | S04      |
| .....Uacggaauuccgaggaacaaa.....                                                                               | 1    | 1      | S04      |
| .....gacggaauuccgaggaacaaa.....                                                                               | 1    | 1      | S04      |
| .....acggaauuccgaggaacaa.....                                                                                 | 5    | 0      | S04      |
| .....cggaauuccgaggaacaa.....                                                                                  | 1    | 0      | S04      |
| .....aaauuccgaggaauuccgagga.....                                                                              | 1    | 0      | S04      |
| .....aaauuccgaggaauuccgagga.....                                                                              | 2    | 0      | S04      |
| .....cgaggaauuuccgaggaucacu.....                                                                              | 4    | 0      | S04      |
| .....cgaggaauuuccgaggaucacC.....                                                                              | 1    | 1      | S04      |
| .....cgaggaauuuccgaggaucacuG.....                                                                             | 3    | 1      | S04      |
| .....cgaggaauuuccgaggaucacua.....                                                                             | 1    | 0      | S04      |
| .....cgaggaauuuccgaggaucacuag.....                                                                            | 7    | 0      | S04      |
| .....cgaggaauuuccgaggaucacuaA.....                                                                            | 1    | 1      | S04      |
| .....gaggaauuuccgaggaug.....                                                                                  | 2    | 1      | S04      |
| .....gaggaauuuccgaggauc.....                                                                                  | 2    | 0      | S04      |
| .....gaggaauuuccgaggauca.....                                                                                 | 1    | 0      | S04      |
| .....gaggaauuucUgaggauca.....                                                                                 | 2    | 1      | S04      |
| .....gaggaauuuccgaggaucacC.....                                                                               | 2    | 1      | S04      |
| .....gaggaauuuccgaggaucacu.....                                                                               | 5    | 0      | S04      |
| .....gaggaauuuccgaggaucacCa.....                                                                              | 1    | 1      | S04      |
| .....gaggaauuuccgaggaucacua.....                                                                              | 2    | 0      | S04      |
| .....gaggaauuuccgaggaucacuag.....                                                                             | 4    | 0      | S04      |
| .....gaggaauuuccgaggaucacuagu.....                                                                            | 2    | 1      | S04      |
| .....gaggaauuuccgaggaucacuagu.....                                                                            | 1    | 1      | S04      |
| .....gaggaauuuccgaggaucacuagu.....                                                                            | 1    | 1      | S04      |
| .....gaggaauuuccgaggaucacuagG.....                                                                            | 3    | 1      | S04      |
| .....gaggaauuuccgaggaucacuagu.....                                                                            | 117  | 0      | S04      |
| .....Uaggaauuuccgaggaucacuagu.....                                                                            | 2    | 1      | S04      |
| .....gaggaauuuccgaggaucacuagC.....                                                                            | 9    | 1      | S04      |
| .....gaggaauuuccgaggaucacuaguu.....                                                                           | 1    | 0      | S04      |
| .....gaggaauuuccgaggaucacuagUA.....                                                                           | 1    | 1      | S04      |
| .....Caggaauuuccgaggaucacuaguu.....                                                                           | 1    | 1      | S04      |
| .....aggaauuuccgaggaucacC.....                                                                                | 1    | 1      | S04      |
| .....aggaauuuccgaggaucacu.....                                                                                | 1    | 0      | S04      |
| .....aggaauuuccgaggaucacuag.....                                                                              | 1    | 1      | S04      |
| .....aggaauuuccgaggaucacuag.....                                                                              | 4    | 0      | S04      |
| .....aggaauuuccgaggaucacuaguu.....                                                                            | 3    | 0      | S04      |
| .....aggaauuuccgaggaucacuaguu.....                                                                            | 1    | 1      | S04      |
| .....aggaauuuccgaggaucacuaguu.....                                                                            | 23   | 0      | S04      |
| .....aggaauuuccgaggaucacuGguu.....                                                                            | 1    | 1      | S04      |
| .....aggaauuuccgaggaucacCaguu.....                                                                            | 1    | 1      | S04      |
| .....aggaauuuccgaggaucacuaguuA.....                                                                           | 1    | 1      | S04      |
| .....ggaauuuccgaggaucacua.....                                                                                | 1    | 0      | S04      |
| .....ggaauuuccgaggaucacuag.....                                                                               | 1    | 0      | S04      |
| .....ggaauuuccgaggaucacuagC.....                                                                              | 1    | 1      | S04      |
| .....ggaauuuccgaggaucacuaguu.....                                                                             | 1    | 1      | S04      |
| .....ggaauuuccgaggaucacuaguu.....                                                                             | 5    | 0      | S04      |
| .....ggaauuuccgaggaucacuaguu.....                                                                             | 4    | 0      | S04      |
| .....ggaauuuccgaggaucacuaguu.....                                                                             | 4    | 0      | S04      |
| .....ggaauuuccgaggaucacuaguu.....                                                                             | 1    | 1      | S04      |
| .....ggaauuuccgaggaucacuaguuC.....                                                                            | 1    | 1      | S04      |
| .....gaaauuccgaggaucacu.....                                                                                  | 1    | 0      | S04      |
| .....gaaauuccgaggaucacuaguu.....                                                                              | 4    | 0      | S04      |
| .....gaaauuccgaggaucacuaguu.....                                                                              | 2    | 0      | S04      |
| .....gaaauuccgaggaucacuaguu.....                                                                              | 1    | 0      | S04      |
| .....gaaauuccgaggaucacuaguuug.....                                                                            | 7    | 0      | S04      |
| .....aaauuccgaggaucacuagG.....                                                                                | 1    | 1      | S04      |
| .....aaauuccgaggaucacuagC.....                                                                                | 1    | 1      | S04      |
| .....aaauuccgaggaucacuaguu.....                                                                               | 3    | 0      | S04      |
| .....aaauuccgaggaucacuaguu.....                                                                               | 2    | 0      | S04      |
| .....aaauuccgaggaucacuaguu.....                                                                               | 1    | 0      | S04      |
| .....aaauuccgaggaucacuaguuug.....                                                                             | 1    | 0      | S04      |



Provisional ID : chrCnn\_random\_3336049  
 Score total : 0.8  
 Score for star read(s) : -1.3  
 Score for read counts : 0  
 Score for mfe : 2.1  
 Score for randfold : 0  
 Score for cons. seed :  
 Total read count : 273  
 Mature read count : 273  
 Loop read count : 0  
 Star read count : 0

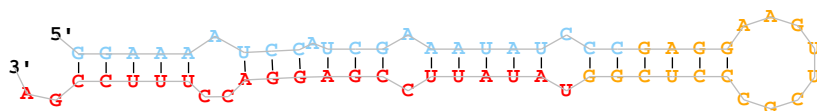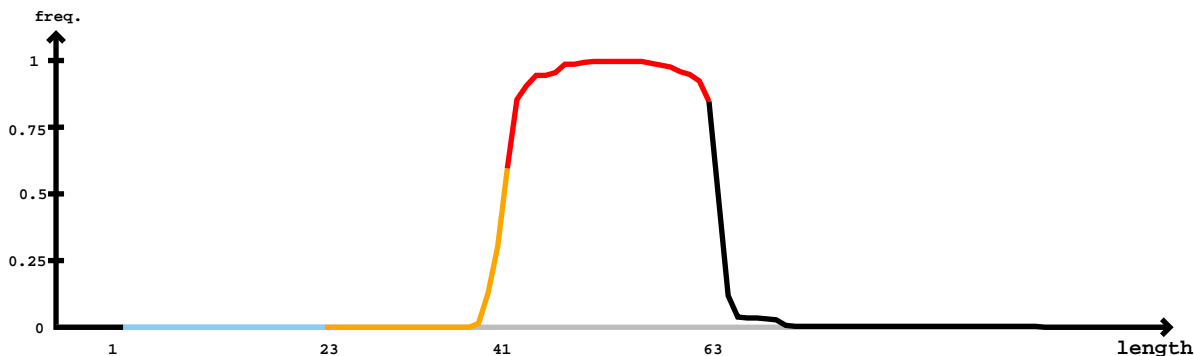

Star

Mature

| 5'                                                                                                          | 3' | exp | reads | mm | sample |
|-------------------------------------------------------------------------------------------------------------|----|-----|-------|----|--------|
| ccaucggaauuuccaucgaaauuuccgaggaaguucgcccucgguauauuuccgaggaccuuuccgaacugguagucccgagauuucccgaaauuuccgaggauuuc |    |     |       |    |        |
| .....                                                                                                       |    |     |       |    |        |
| .....cgguaauuuccgaggaccuuuc.....                                                                            |    |     | 1     | 0  | S03    |
| .....gguauuuccgaggaccu.....                                                                                 |    |     | 1     | 0  | S03    |
| .....gguauuuccgaggaccuuu.....                                                                               |    |     | 1     | 0  | S03    |
| .....gguauuuccgaggaccuuucc.....                                                                             |    |     | 1     | 0  | S03    |
| .....gguauuuccgaggaccuuuccg.....                                                                            |    |     | 2     | 0  | S03    |
| .....gguauuuccgaggaccuuuccA.....                                                                            |    |     | 1     | 1  | S03    |
| .....gguauuuccgaggaccuuuccGU.....                                                                           |    |     | 1     | 1  | S03    |
| .....gguauuuccgaggaccuuuccga.....                                                                           |    |     | 8     | 0  | S03    |
| .....gguauuuccgaggaccuuuccgG.....                                                                           |    |     | 1     | 1  | S03    |
| .....guauuuccgaggaccuuuccg.....                                                                             |    |     | 1     | 0  | S03    |
| .....guauuuccgGggaccuuuccga.....                                                                            |    |     | 1     | 1  | S03    |
| .....guauuuccgaggaccuuuccga.....                                                                            |    |     | 4     | 0  | S03    |
| .....guauuuccgaggaccuuuccgac.....                                                                           |    |     | 13    | 0  | S03    |
| .....guauuuccgaggaccCuuccgac.....                                                                           |    |     | 1     | 1  | S03    |
| .....guauuuccgaggaccuuuccgaA.....                                                                           |    |     | 1     | 1  | S03    |
| .....uauuuccgaggaccuuu.....                                                                                 |    |     | 1     | 0  | S03    |
| .....uauuuccgaggaccuuuc.....                                                                                |    |     | 1     | 0  | S03    |
| .....uauuuccgaggaccuuucc.....                                                                               |    |     | 1     | 0  | S03    |
| .....uauuuccgaggaccuuuccA.....                                                                              |    |     | 1     | 1  | S03    |
| .....uauuuccgaggaccuuuccg.....                                                                              |    |     | 2     | 0  | S03    |
| .....uauuuccgaggaccuuuccga.....                                                                             |    |     | 26    | 0  | S03    |
| .....uauGuuccgaggaccuuuccga.....                                                                            |    |     | 1     | 1  | S03    |
| .....uauaCuuccgaggaccuuuccga.....                                                                           |    |     | 1     | 1  | S03    |
| .....uauuuccgaggaccuuuccGU.....                                                                             |    |     | 5     | 1  | S03    |
| .....uauuuccgaggaccuuuccgac.....                                                                            |    |     | 5     | 0  | S03    |
| .....uauuuccgaggaccuuuccgacU.....                                                                           |    |     | 1     | 1  | S03    |
| .....auuuccgaggaccuuucc.....                                                                                |    |     | 1     | 0  | S03    |
| .....auuuccgaggaccuuuccA.....                                                                               |    |     | 1     | 1  | S03    |
| .....auuuccgaggaccuuuccg.....                                                                               |    |     | 3     | 0  | S03    |
| .....auuuccgaggaccuuuccGU.....                                                                              |    |     | 1     | 1  | S03    |
| .....auuuccgaggaccuuuccga.....                                                                              |    |     | 21    | 0  | S03    |
| .....auuuccgaggaccuuuccgac.....                                                                             |    |     | 5     | 0  | S03    |
| .....auuuccgaggaccuuuccgacg.....                                                                            |    |     | 2     | 0  | S03    |
| .....auuuccgaggaccuuuccgacU.....                                                                            |    |     | 1     | 1  | S03    |

Star

Mature

ccaucggaaaauccaucgaaauuccggaggaaguucgcccucgguaauuccgaggaccuuuccgacgaacugguagucccgaguuuccucggaaaauuccgagggaauuc

|                             |    |   |     |
|-----------------------------|----|---|-----|
| .Nuauuccgaggaccuuuccgacg    | 1  | 1 | S03 |
| .uauuccgaggaccuuuccg        | 1  | 0 | S03 |
| .uauuccgaggaccuuuccgac      | 2  | 0 | S03 |
| .uauuccgaggaccuuuccgacg     | 2  | 0 | S03 |
| .auuccgaggaccuuuccC         | 1  | 1 | S03 |
| .auuccgaggaccuuuccga        | 1  | 0 | S03 |
| .auuccgaggaccuuuccgac       | 3  | 0 | S03 |
| .auuccgaggaccuuuccgacC      | 1  | 1 | S03 |
| .uccgaggaccuuuccgac         | 2  | 0 | S03 |
| .ccgaggaccuuuccgacU         | 2  | 1 | S03 |
| .ccgaggaccuuuccgacgaacC     | 1  | 1 | S03 |
| .ccgaggaccuuuccgacAaacug    | 5  | 1 | S03 |
| .gaggaccuuuccgacgaacuggua   | 1  | 0 | S03 |
| .aggaccuuuccgacgaacugg      | 1  | 0 | S03 |
| .cgguauauuccgaggacc         | 2  | 0 | S04 |
| .cgguauauuccgaggaccuuuc     | 1  | 0 | S04 |
| .gguaauauuccgaggaccu        | 1  | 0 | S04 |
| .gguaauauuccgaggaccuuuA     | 1  | 1 | S04 |
| .gguaauauuccgaggaccuuucc    | 1  | 0 | S04 |
| .gguaauauuccgaggaccuuuccg   | 1  | 0 | S04 |
| .gguaauauuccgaggaccuuuccga  | 10 | 0 | S04 |
| .gguaauauuccgaggaccuuuccgG  | 1  | 1 | S04 |
| .gguaauauuccgagUaccuuuccgac | 1  | 1 | S04 |
| .gguaauauuccgaggaccuuuccgac | 1  | 0 | S04 |
| .guaauauuccgaggaccuA        | 2  | 1 | S04 |
| .guaauauuccgaggaccuuu       | 1  | 0 | S04 |
| .guaauauuccgaggaccuuuA      | 1  | 1 | S04 |
| .guaauauuccgaggaccuuuccg    | 1  | 0 | S04 |
| .guaauauuccgaggaccuuuccA    | 1  | 1 | S04 |
| .guaauauuccgaggaccuuuccga   | 2  | 0 | S04 |
| .guaauauuccgaggaccuuuccgaG  | 2  | 1 | S04 |
| .guaauauuccgaggaccuuuccgac  | 16 | 0 | S04 |
| .guaauauuccgaggaccuuuccgaA  | 3  | 1 | S04 |
| .uauauuccgaggaccuuu         | 2  | 0 | S04 |
| .uauauuccgaggaccuuucc       | 1  | 0 | S04 |
| .uauauuccgaggaccuuuccg      | 4  | 0 | S04 |
| .uauauuccgaggaccuuuccU      | 1  | 1 | S04 |
| .uauauuccgGggaccuuuccga     | 1  | 1 | S04 |
| .uauauuccgaggaccuuuccgG     | 2  | 1 | S04 |
| .uauauuccgaggaccuuuccgU     | 1  | 1 | S04 |
| .uauauuccgaggGccuuuccga     | 1  | 1 | S04 |
| .uauauuccgaggaccuuuccga     | 22 | 0 | S04 |
| .uauauuccgaggaccuuuccgac    | 4  | 0 | S04 |
| .auauuccgaggaccuuuccC       | 1  | 1 | S04 |
| .auauuccgaggaccuuuccgC      | 1  | 1 | S04 |
| .auauuccgaggaccuuuccgG      | 1  | 1 | S04 |
| .auauuccgUggaccuuuccga      | 1  | 1 | S04 |
| .auauuccgaggaccuuuccga      | 17 | 0 | S04 |
| .auauuccgaggaccuuuccgac     | 11 | 0 | S04 |
| .auauuccgaggaccuuuccgacg    | 5  | 0 | S04 |
| .auauuccgaggaccuuuccgacga   | 1  | 0 | S04 |
| .uauuccgaggaccuuuccga       | 2  | 0 | S04 |
| .uauuccgaggaccuuuccgac      | 4  | 0 | S04 |
| .uauuccgaggaccuuuccgacg     | 4  | 0 | S04 |
| .auuccgaggaccuuuccgac       | 1  | 0 | S04 |
| .auuccgaggaccuuuccgacg      | 3  | 0 | S04 |
| .auuccgaggaccuuuccgacCaac   | 1  | 1 | S04 |
| .uccgaggaccuuuccgac         | 1  | 0 | S04 |
| .ccgaggaccuuuccgacg         | 1  | 0 | S04 |
| .gaggaccuuuccgacgaacug      | 1  | 0 | S04 |
| .guccucggaguuccucggaaauC    | 1  | 1 | S04 |





Star

Mature

|                                         |               |                       |                                    |    |   |
|-----------------------------------------|---------------|-----------------------|------------------------------------|----|---|
| aaucuuacgaugacgaauugcuuggaugcugcugcuuuu | aaagaaagcuuuu | caugaugacgaauaugagagc | cgaaggagucgaaguuggaguuuucaacaaguuc |    |   |
| .....augacgaauaugagagc.....             |               |                       |                                    | 1  | 0 |
| .....acgaauaugagagcGgaaggagu.....       |               |                       |                                    | 1  | 1 |
| .....acgaauaugagagcAgaaggagu.....       |               |                       |                                    | 1  | 1 |
| .....acgaauaugagagccgaaggagu.....       |               |                       |                                    | 1  | 0 |
| .....augaagagccgaaggagucgaagu.....      |               |                       |                                    | 2  | 0 |
| .....ggagucgaaguugUgaguuucaa.....       |               |                       |                                    | 1  | 1 |
| .....gAuggacguugcaugcugcuuuua.....      |               |                       |                                    | 1  | 1 |
| .....aagaagcuuuucaugauga.....           |               |                       |                                    | 1  | 0 |
| .....aaagcuuuucaugaugaUgaauu.....       |               |                       |                                    | 1  | 1 |
| .....uucaugaugacgaauaugagGgc.....       |               |                       |                                    | 1  | 1 |
| .....uucaugaugacgaauaugagagc.....       |               |                       |                                    | 6  | 0 |
| .....uucaugaugacgaauaugagagA.....       |               |                       |                                    | 1  | 1 |
| .....uucaugaugacgaauuUaagagc.....       |               |                       |                                    | 1  | 1 |
| .....uucaugaugacgGauaugagagc.....       |               |                       |                                    | 1  | 1 |
| .....ucaugaugacgaauaugaga.....          |               |                       |                                    | 1  | 0 |
| .....ucaugaugacgaauaugagag.....         |               |                       |                                    | 1  | 0 |
| .....ucaugaugacgaauaugagagc.....        |               |                       |                                    | 2  | 0 |
| .....ucaugaugacgaauaugagagcc.....       |               |                       |                                    | 3  | 0 |
| .....ucaugaugacgaauaugagagcG.....       |               |                       |                                    | 1  | 1 |
| .....ucaugaugacgaauaugagagcA.....       |               |                       |                                    | 3  | 1 |
| .....caugaugacgaauaugag.....            |               |                       |                                    | 4  | 0 |
| .....caugaugacgaauaugaga.....           |               |                       |                                    | 1  | 0 |
| .....caugaugacgaauaugagA.....           |               |                       |                                    | 1  | 1 |
| .....caugaugacgaauaugagagG.....         |               |                       |                                    | 1  | 1 |
| .....caugaugacgaauaugagagA.....         |               |                       |                                    | 4  | 1 |
| .....caugaugacgaauaugagagc.....         |               |                       |                                    | 29 | 0 |
| .....caugaugacgaauaugagGgc.....         |               |                       |                                    | 2  | 1 |
| .....caugaugacgUauaugagagc.....         |               |                       |                                    | 2  | 1 |
| .....caugaugacgaauaugagagcA.....        |               |                       |                                    | 2  | 1 |
| .....Gaugaugacgaauaugagagcc.....        |               |                       |                                    | 1  | 1 |
| .....caugaugacgaauaugagagcG.....        |               |                       |                                    | 2  | 1 |
| .....caugaugacgaauaugagagccg.....       |               |                       |                                    | 1  | 0 |
| .....augaugacgaauaugag.....             |               |                       |                                    | 1  | 0 |
| .....augaugacgaauaugaga.....            |               |                       |                                    | 1  | 0 |
| .....augaugacgaauaugagagG.....          |               |                       |                                    | 1  | 1 |
| .....augaugacgaauaugagagc.....          |               |                       |                                    | 13 | 0 |
| .....augaugacgGauaugagagc.....          |               |                       |                                    | 1  | 1 |
| .....augaugacgaauaugagagcc.....         |               |                       |                                    | 1  | 0 |
| .....Nugaugacgaauaugagagcc.....         |               |                       |                                    | 1  | 1 |
| .....augaugacgaauaugagagcA.....         |               |                       |                                    | 2  | 1 |
| .....augaugacgaauaugagagcG.....         |               |                       |                                    | 1  | 1 |
| .....augaugacgaauaugagagccg.....        |               |                       |                                    | 1  | 0 |
| .....augaugacgaauaugagagcAga.....       |               |                       |                                    | 1  | 1 |
| .....ugaugacgaauaugagagA.....           |               |                       |                                    | 1  | 1 |
| .....ugaugacgaauaugagagc.....           |               |                       |                                    | 1  | 0 |
| .....ugaugacgaauaugagagcc.....          |               |                       |                                    | 1  | 0 |
| .....ugaugacgaauaugagagccga.....        |               |                       |                                    | 1  | 0 |
| .....gaugacgaauaugagagc.....            |               |                       |                                    | 9  | 0 |
| .....gaugacgaauaugagagA.....            |               |                       |                                    | 1  | 1 |
| .....gaugacgaauaugagagcG.....           |               |                       |                                    | 3  | 1 |
| .....gaugacgaauaugagagcc.....           |               |                       |                                    | 4  | 0 |
| .....augacgaauaugagagcc.....            |               |                       |                                    | 1  | 0 |
| .....augacgaauaugagagccga.....          |               |                       |                                    | 1  | 0 |
| .....ugacgaauaugagagcc.....             |               |                       |                                    | 1  | 0 |
| .....gacgaauaugagagccgaagga.....        |               |                       |                                    | 1  | 0 |
| .....acgaauaugagagccgaaggagu.....       |               |                       |                                    | 1  | 0 |
| .....acgaauaugagagccgaaggagc.....       |               |                       |                                    | 1  | 1 |
| .....augaagagccgaaggagucgaagu.....      |               |                       |                                    | 3  | 0 |
| .....cgaaggagucgaaguugUgaguuu.....      |               |                       |                                    | 1  | 1 |
| .....ggagucgaaguugUgaguuucaa.....       |               |                       |                                    | 2  | 1 |
| .....gagucgaaguugUgaguuucaa.....        |               |                       |                                    | 1  | 1 |

Provisional ID : chrCnn\_random\_3343994  
 Score total : 1.7  
 Score for star read(s) : 3.9  
 Score for read counts : -4.4  
 Score for mfe : 2.3  
 Score for randfold : 0  
 Score for cons. seed :  
 Total read count : 3  
 Mature read count : 2  
 Loop read count : 0  
 Star read count : 1

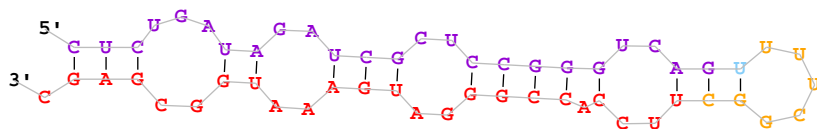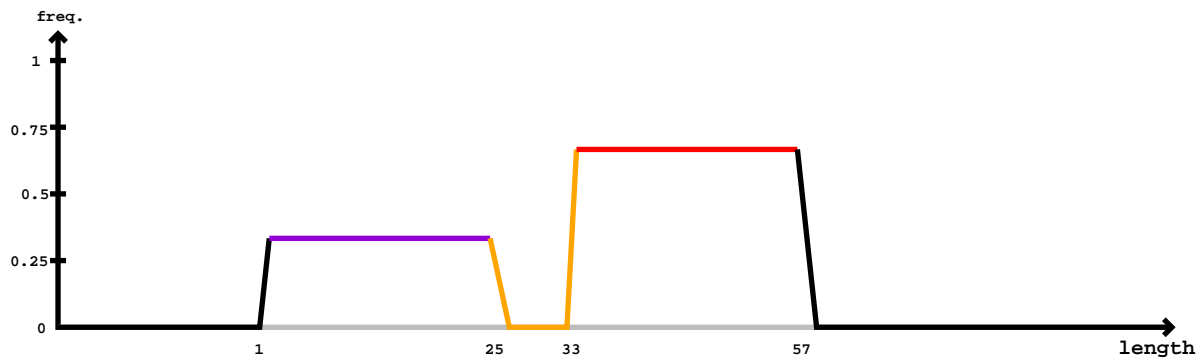

**Star** **Mature**

| 5' -                  |                                                                                               | -3' | obs | exp | reads | mm | sample |
|-----------------------|-----------------------------------------------------------------------------------------------|-----|-----|-----|-------|----|--------|
| ggagcgaccuggaguggucg  | cucugauagaucgucuccgggucaguuuucggcuuccaccgggaugaaauggcgagcaacuucucggggucguccagcgaggucgucugagag |     |     |     | 1     | 0  | S03    |
| ggagcgaccuggaguggucgc | ucugauagaucgucuccgggucaguuuucggcuuccaccgggaugaaauggcgagcaacuucucggggucguccagcgaggucgucugagag  |     |     |     | 1     | 0  | S04    |
|                       | .....cucugauagaucgucuccgggucag.....                                                           |     |     |     | 1     | 1  | S04    |
|                       | .....uuccaccgggaugaaauggcgagc.....                                                            |     |     |     |       |    |        |
|                       | .....uuccaccgggaugaaauggcgagA.....                                                            |     |     |     |       |    |        |



Provisional ID : chrCnn\_random\_3351407  
 Score total : 134.9  
 Score for star read(s) : 3.9  
 Score for read counts : 141.9  
 Score for mfe : -10.7  
 Score for randfold : 0  
 Score for cons. seed :  
 Total read count : 290  
 Mature read count : 289  
 Loop read count : 0  
 Star read count : 1

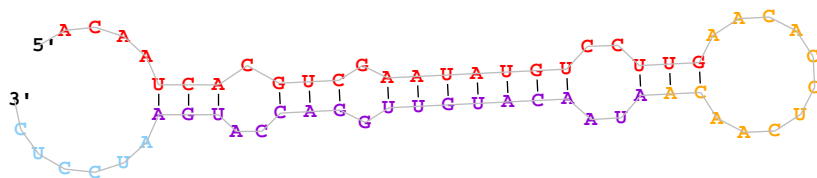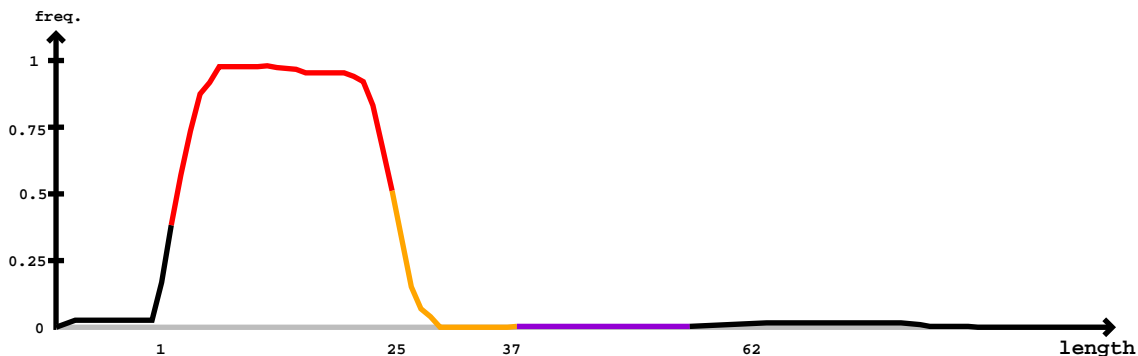

**Mature**

**Star**

| 5'                                                                                                                                                                                                  | obs | reads | mm | sample |
|-----------------------------------------------------------------------------------------------------------------------------------------------------------------------------------------------------|-----|-------|----|--------|
| ccaacuugaa <b>acaau</b> cacgucgaa <b>auguccu</b> ga <b>aacaccu</b> ca <b>aca</b> au <b>aac</b> augu <b>uggacc</b> augaa <b>uccu</b> cauaucauau <b>acucuc</b> ucaau <b>aug</b> aucuuc <b>cca</b> uca | -3' |       |    |        |
| ccaacuugaa <b>acaau</b> cacgucgaa <b>auguccu</b> ga <b>aacaccu</b> ca <b>aca</b> au <b>aac</b> augu <b>uggacc</b> augaa <b>uccu</b> cauaucauau <b>acucuc</b> ucaau <b>aug</b> aucuuc <b>cca</b> uca | exp |       |    |        |
| .....(((.....(((.....(((.....(((.....(((.....)))))))))))))))))).....((((((((.....)))))))))).....                                                                                                    |     |       |    |        |
| ccaacuug <b>G</b> aacaau <b>c</b> acguc.....                                                                                                                                                        | 1   | 1     | 1  | S03    |
| ccaacuug <b>G</b> aacaau <b>c</b> acgucg.....                                                                                                                                                       | 1   | 1     | 1  | S03    |
| ccaacuug <b>G</b> aacaau <b>c</b> acgucgaa.....                                                                                                                                                     | 3   | 1     | 1  | S03    |
| ..... <b>a</b> acaau <b>c</b> acgucgaa <b>au</b> g.....                                                                                                                                             | 1   | 0     | 0  | S03    |
| ..... <b>a</b> acaau <b>c</b> acgucgaa <b>au</b> guc.....                                                                                                                                           | 3   | 0     | 0  | S03    |
| ..... <b>a</b> acaau <b>c</b> acgucgaa <b>au</b> guc.....                                                                                                                                           | 1   | 1     | 1  | S03    |
| ..... <b>a</b> acaau <b>U</b> acgucgaa <b>au</b> guc.....                                                                                                                                           | 1   | 1     | 1  | S03    |
| ..... <b>a</b> acaau <b>c</b> acgucgaa <b>au</b> guc <b>U</b> .....                                                                                                                                 | 1   | 1     | 1  | S03    |
| ..... <b>a</b> acaau <b>c</b> acgucgaa <b>au</b> guc <b>A</b> .....                                                                                                                                 | 2   | 1     | 1  | S03    |
| ..... <b>a</b> acaau <b>c</b> acgucgaa <b>au</b> guc <b>U</b> .....                                                                                                                                 | 4   | 1     | 1  | S03    |
| ..... <b>a</b> acaau <b>c</b> acgucgaa <b>au</b> guc <b>C</b> .....                                                                                                                                 | 6   | 0     | 0  | S03    |
| ..... <b>a</b> acaau <b>c</b> acgucgaa <b>au</b> guc <b>G</b> .....                                                                                                                                 | 1   | 1     | 1  | S03    |
| ..... <b>a</b> acaau <b>c</b> acgucgaa <b>au</b> guc <b>CU</b> .....                                                                                                                                | 6   | 0     | 0  | S03    |
| ..... <b>a</b> acaau <b>c</b> acgucgaa <b>au</b> guc <b>CA</b> .....                                                                                                                                | 1   | 1     | 1  | S03    |
| ..... <b>a</b> acaau <b>c</b> acgucgaa <b>au</b> guc <b>CUU</b> .....                                                                                                                               | 3   | 0     | 0  | S03    |
| ..... <b>a</b> acaau <b>c</b> acgucgaa <b>au</b> guc <b>CC</b> .....                                                                                                                                | 1   | 1     | 1  | S03    |
| ..... <b>a</b> acaau <b>c</b> acgucgaa <b>au</b> guc <b>CUU</b> .....                                                                                                                               | 1   | 1     | 1  | S03    |
| ..... <b>a</b> acaau <b>c</b> acgucgaa <b>au</b> guc <b>CCU</b> .....                                                                                                                               | 2   | 0     | 0  | S03    |
| ..... <b>a</b> acaau <b>c</b> acgucgaa <b>au</b> guc <b>CU</b> .....                                                                                                                                | 13  | 0     | 0  | S03    |
| ..... <b>a</b> acaau <b>c</b> acg <b>G</b> cgaa <b>au</b> guc <b>CU</b> .....                                                                                                                       | 1   | 1     | 1  | S03    |
| ..... <b>a</b> acaau <b>c</b> acgucgaa <b>au</b> guc <b>CG</b> .....                                                                                                                                | 1   | 1     | 1  | S03    |
| ..... <b>a</b> acaau <b>c</b> acgucgaa <b>au</b> guc <b>CC</b> .....                                                                                                                                | 2   | 1     | 1  | S03    |
| ..... <b>a</b> acaau <b>c</b> acgucgaa <b>au</b> guc <b>CUU</b> .....                                                                                                                               | 8   | 0     | 0  | S03    |
| ..... <b>a</b> acaau <b>c</b> acgucgaa <b>A</b> auguc <b>CUU</b> .....                                                                                                                              | 1   | 1     | 1  | S03    |
| ..... <b>a</b> acaau <b>c</b> acgucgaa <b>au</b> guc <b>CUUG</b> .....                                                                                                                              | 14  | 0     | 0  | S03    |
| ..... <b>c</b> aaucacgucgaa <b>au</b> guc <b>U</b> .....                                                                                                                                            | 1   | 1     | 1  | S03    |
| ..... <b>c</b> aaucacgucgaa <b>au</b> guc <b>CG</b> .....                                                                                                                                           | 1   | 1     | 1  | S03    |
| ..... <b>c</b> aaucacgucgaa <b>au</b> guc <b>CA</b> .....                                                                                                                                           | 1   | 1     | 1  | S03    |
| ..... <b>c</b> aaucacgucgaa <b>au</b> guc <b>CUU</b> .....                                                                                                                                          | 3   | 0     | 0  | S03    |
| ..... <b>c</b> aauc <b>C</b> cgucgaa <b>au</b> guc <b>CUU</b> .....                                                                                                                                 | 1   | 1     | 1  | S03    |
| ..... <b>c</b> aaucacgucgaa <b>au</b> guc <b>CG</b> .....                                                                                                                                           | 1   | 1     | 1  | S03    |
| ..... <b>c</b> aaucacgucgaa <b>au</b> guc <b>CUU</b> .....                                                                                                                                          | 9   | 0     | 0  | S03    |

Mature

Star

|                                                                                                         |    |   |     |
|---------------------------------------------------------------------------------------------------------|----|---|-----|
| ccaacuugaaacaaucaugcugaaauauguccuugaacaccucaacaauaacauguggaccaugaauccucauaucauauacucucucaauaugaucuccuca |    |   |     |
| .....cauacgucgaaauauguccuC.....                                                                         | 2  | 1 | S03 |
| .....cauacgucgaaauauguccuA.....                                                                         | 1  | 1 | S03 |
| .....cauacgucgaaauauguccuU.....                                                                         | 3  | 1 | S03 |
| .....cauacgucgaaauauguccuU.....                                                                         | 2  | 1 | S03 |
| .....cauacgucgaaauauguccuU.....                                                                         | 1  | 1 | S03 |
| .....cauacgucgaaauauguccuug.....                                                                        | 6  | 0 | S03 |
| .....cauacgucgaaauauguccuuga.....                                                                       | 5  | 0 | S03 |
| .....aaucacgucgaaauauguccu.....                                                                         | 1  | 0 | S03 |
| .....aaucacgucgaaauauguccuG.....                                                                        | 1  | 1 | S03 |
| .....aaucacgucgaaauauguccuu.....                                                                        | 5  | 0 | S03 |
| .....aaucacgucgUauauguccuug.....                                                                        | 1  | 1 | S03 |
| .....aaucacgucgaaauauguccuuA.....                                                                       | 4  | 1 | S03 |
| .....aaucacgucgaaauauguccuug.....                                                                       | 8  | 0 | S03 |
| .....aaucacgucgaaUGuguccuug.....                                                                        | 1  | 1 | S03 |
| .....aaucacgucgaaauauguccuuU.....                                                                       | 1  | 1 | S03 |
| .....aaucacgucgaaauauguccuuga.....                                                                      | 5  | 0 | S03 |
| .....Uaucacgucgaaauauguccuugaa.....                                                                     | 1  | 1 | S03 |
| .....aaucacgucgaaauauguccuAga.....                                                                      | 1  | 1 | S03 |
| .....aaucacgucgaaauauguccuugaG.....                                                                     | 2  | 1 | S03 |
| .....aaucacgucgaaauauguccuugaa.....                                                                     | 8  | 0 | S03 |
| .....aucacgucgaaauauguccG.....                                                                          | 1  | 1 | S03 |
| .....aucacgucgaaauauguccu.....                                                                          | 1  | 0 | S03 |
| .....aucacgucgaaauauguccuu.....                                                                         | 1  | 0 | S03 |
| .....aucacgucAaaauauguccuu.....                                                                         | 1  | 1 | S03 |
| .....aucacgucgaaauaugCccuug.....                                                                        | 1  | 1 | S03 |
| .....aucacgCcgaaauauguccuug.....                                                                        | 1  | 1 | S03 |
| .....aucacgucgaaauauguccuuA.....                                                                        | 1  | 1 | S03 |
| .....aucacgucgaaauauguccuug.....                                                                        | 5  | 0 | S03 |
| .....aucacgucgaaauauguccuuga.....                                                                       | 12 | 0 | S03 |
| .....aucacgucgaaauauguccuugU.....                                                                       | 3  | 1 | S03 |
| .....aucacgucgaaauauguccuugaaU.....                                                                     | 3  | 1 | S03 |
| .....aucacgucgaaauauguccuugaac.....                                                                     | 3  | 0 | S03 |
| .....aucacgucgaaauauguccuugaacG.....                                                                    | 1  | 1 | S03 |
| .....ucacgucgaaauauguccG.....                                                                           | 1  | 1 | S03 |
| .....ucacgucgaaauauguccu.....                                                                           | 1  | 0 | S03 |
| .....Ccacgucgaaauauguccuug.....                                                                         | 1  | 1 | S03 |
| .....ucacgucgaaauauguccuug.....                                                                         | 1  | 0 | S03 |
| .....ucacgucgaaauauguccuuga.....                                                                        | 1  | 0 | S03 |
| .....ucacgucgaaauauguccuugaa.....                                                                       | 2  | 0 | S03 |
| .....ucacgucgaaauauguccuugaaca.....                                                                     | 1  | 0 | S03 |
| .....cacgucgaaauauguccuu.....                                                                           | 1  | 0 | S03 |
| .....cacgucgaaauauguccAu.....                                                                           | 1  | 1 | S03 |
| .....cacgucgaaauauguccuuga.....                                                                         | 1  | 0 | S03 |
| .....cacgucgaaauauguccuugaaca.....                                                                      | 3  | 0 | S03 |
| .....cgaaauauguccuugaaca.....                                                                           | 1  | 0 | S03 |
| .....auaGcauguggaccauga.....                                                                            | 1  | 1 | S03 |
| .....uccucauaucauauacucucuc.....                                                                        | 1  | 0 | S03 |
| .....uccucauaucauauacucucuca.....                                                                       | 1  | 0 | S03 |
| .....uaucauauacucucucaauaug.....                                                                        | 1  | 0 | S03 |
| ccaacuugGaaacaaucauguc.....                                                                             | 1  | 1 | S04 |
| ccaacuugGaaacaaucaugucg.....                                                                            | 1  | 1 | S04 |
| ccaacuugGaaacaaucaugucgaa.....                                                                          | 1  | 1 | S04 |
| .....aacaaucaugcugaaauaugu.....                                                                         | 1  | 0 | S04 |
| .....aacaaucaugcugaaauaugu.....                                                                         | 1  | 1 | S04 |
| .....aacaaucaugcugaaauauguA.....                                                                        | 2  | 1 | S04 |
| .....aacaaucaugcugaaauaugucc.....                                                                       | 6  | 0 | S04 |
| .....aacaaucaugcugaaauauguU.....                                                                        | 1  | 1 | S04 |
| .....acaaucaugcugaaauauguccA.....                                                                       | 1  | 1 | S04 |
| .....acaaucaugcugaaauauguccu.....                                                                       | 1  | 1 | S04 |
| .....acaaucaugcugaaauauguccu.....                                                                       | 7  | 0 | S04 |
| .....acaaucaugcugaaauauguccuA.....                                                                      | 1  | 1 | S04 |
| .....acaaucaugcugaaauauguccuu.....                                                                      | 2  | 0 | S04 |
| .....acaaucaugcugaaauauguccuug.....                                                                     | 6  | 0 | S04 |
| .....acaaucaugcugaaauauguccuuA.....                                                                     | 1  | 1 | S04 |
| .....acaaucaugcugaaauauguccuuU.....                                                                     | 1  | 1 | S04 |
| .....acaaucaugcugaaauauguccuuga.....                                                                    | 1  | 0 | S04 |
| .....caaucaugcugaaauaugu.....                                                                           | 1  | 0 | S04 |
| .....caaucaugcugaaauauguU.....                                                                          | 1  | 1 | S04 |
| .....caaucaugcugaaauauguccA.....                                                                        | 2  | 1 | S04 |

Mature

Star

|            |              |               |            |                |       |                       |                     |   |   |     |
|------------|--------------|---------------|------------|----------------|-------|-----------------------|---------------------|---|---|-----|
| ccaacuugaa | caucacgucgaa | auguccuuga    | accuccaaca | aaacauguggacca | gaa   | uccucauaucauauacucucu | caauaugaucucuccauca |   |   |     |
| .....      | caucacgucgaa | auguccC       | .....      | .....          | ..... | .....                 | .....               | 1 | 1 | S04 |
| .....      | caucacgucgaa | auguccG       | .....      | .....          | ..... | .....                 | .....               | 1 | 1 | S04 |
| .....      | caucacgucgaa | auguccuA      | .....      | .....          | ..... | .....                 | .....               | 2 | 1 | S04 |
| .....      | caucacgucgaa | auguccuu      | .....      | .....          | ..... | .....                 | .....               | 3 | 0 | S04 |
| .....      | caucacgucgaa | auguccuuU     | .....      | .....          | ..... | .....                 | .....               | 2 | 1 | S04 |
| .....      | caucacgucgaa | auguccuuA     | .....      | .....          | ..... | .....                 | .....               | 1 | 1 | S04 |
| .....      | caucacgucgaa | auguccuugC    | .....      | .....          | ..... | .....                 | .....               | 2 | 1 | S04 |
| .....      | caucacgucgaa | auguccuuga    | .....      | .....          | ..... | .....                 | .....               | 3 | 0 | S04 |
| .....      | caucacgucgaa | auguccCuga    | .....      | .....          | ..... | .....                 | .....               | 1 | 1 | S04 |
| .....      | aaucacgucgaa | auguccuu      | .....      | .....          | ..... | .....                 | .....               | 1 | 0 | S04 |
| .....      | aaucacgucgaa | auguccuug     | .....      | .....          | ..... | .....                 | .....               | 5 | 0 | S04 |
| .....      | aaucacgucgaa | auguccuuA     | .....      | .....          | ..... | .....                 | .....               | 1 | 1 | S04 |
| .....      | aaucacgucgaa | auguccuugaa   | .....      | .....          | ..... | .....                 | .....               | 4 | 0 | S04 |
| .....      | aucacgucgaa  | auguccuug     | .....      | .....          | ..... | .....                 | .....               | 1 | 0 | S04 |
| .....      | aucacgucgaa  | auguccuuga    | .....      | .....          | ..... | .....                 | .....               | 2 | 0 | S04 |
| .....      | aucacgucgaa  | auguccuugaa   | .....      | .....          | ..... | .....                 | .....               | 3 | 0 | S04 |
| .....      | aucacgucgaa  | auguccuugaac  | .....      | .....          | ..... | .....                 | .....               | 1 | 0 | S04 |
| .....      | aucacgucgaa  | auguccuugaaA  | .....      | .....          | ..... | .....                 | .....               | 1 | 1 | S04 |
| .....      | ucacgucgaa   | auguccuu      | .....      | .....          | ..... | .....                 | .....               | 1 | 0 | S04 |
| .....      | ucacgucgaa   | augucAuug     | .....      | .....          | ..... | .....                 | .....               | 1 | 1 | S04 |
| .....      | ucacgucgaa   | auguccuuga    | .....      | .....          | ..... | .....                 | .....               | 2 | 0 | S04 |
| .....      | ucacgucgaa   | auguccuugaacC | .....      | .....          | ..... | .....                 | .....               | 1 | 1 | S04 |
| .....      | cacgucgaa    | auguccuu      | .....      | .....          | ..... | .....                 | .....               | 1 | 0 | S04 |
| .....      | cacgucgaa    | auguccuug     | .....      | .....          | ..... | .....                 | .....               | 1 | 0 | S04 |
| .....      | cacgucgaa    | auguccuCga    | .....      | .....          | ..... | .....                 | .....               | 1 | 1 | S04 |
| .....      | cacgucgaa    | auguccuuga    | .....      | .....          | ..... | .....                 | .....               | 1 | 0 | S04 |
| .....      | cacgucgaa    | auguccuuga    | .....      | .....          | ..... | .....                 | .....               | 2 | 0 | S04 |
| .....      | cacgucgaa    | auguccuugaac  | .....      | .....          | ..... | .....                 | .....               | 1 | 0 | S04 |
| .....      | cacgucgaa    | auguccuugaaca | .....      | .....          | ..... | .....                 | .....               | 2 | 0 | S04 |
| .....      | cacgucgaa    | auguccuugaacC | .....      | .....          | ..... | .....                 | .....               | 1 | 1 | S04 |
| .....      | cacgucgaa    | auguccuugaacG | .....      | .....          | ..... | .....                 | .....               | 2 | 1 | S04 |
| .....      | .....        | .....         | .....      | .....          | ..... | uccucauaucauauacucucu | .....               | 1 | 0 | S04 |
| .....      | .....        | .....         | .....      | .....          | ..... | uccucauaucauauacucucu | .....               | 1 | 0 | S04 |







Star

Mature

| Sequence                             | Star | Mature | Category |
|--------------------------------------|------|--------|----------|
| .....ccucauuuggauccgaacacc.....      | 1    | 0      | S04      |
| .....ccucauuuggauccgaacaccauu.....   | 1    | 0      | S04      |
| .....cucauuuggaCccgaaca.....         | 1    | 1      | S04      |
| .....cucauuuggauccgaacC.....         | 1    | 1      | S04      |
| .....cucauuuggauccgaUca.....         | 1    | 1      | S04      |
| .....cucauuuggauccgaaca.....         | 4    | 0      | S04      |
| .....cucauuuggauccgaacac.....        | 2    | 0      | S04      |
| .....ucauuuggauccgaacacGaa.....      | 2    | 1      | S04      |
| .....uggauccgaacaccauuugcuU.....     | 1    | 1      | S04      |
| .....auucaagggauuggagaaaucaug.....   | 2    | 0      | S04      |
| .....uucaagggauuggagaaauca.....      | 1    | 0      | S04      |
| .....uucaagggauuggagaaaucaC.....     | 1    | 1      | S04      |
| .....uucaagggauuggagaaaucauU.....    | 1    | 1      | S04      |
| .....uucagggauuggagaaaucauga.....    | 2    | 0      | S04      |
| .....ucaagggauuggagaaaucauA.....     | 1    | 1      | S04      |
| .....ucaagggauuggagaaaucaugag.....   | 1    | 0      | S04      |
| .....caagggauuggagaaaucauA.....      | 1    | 1      | S04      |
| .....caagggauuggagaaaucauga.....     | 1    | 0      | S04      |
| .....caagggauuggGgaaaucaugagg.....   | 1    | 1      | S04      |
| .....caagggauuggagaaaucaugagg.....   | 2    | 0      | S04      |
| .....aagggauuggagaaaucaug.....       | 1    | 0      | S04      |
| .....aagggauuggagaaaucauga.....      | 2    | 0      | S04      |
| .....aagggauuggagaaaucaugagg.....    | 1    | 0      | S04      |
| .....aagggauuggagaaaucaugaggc.....   | 25   | 0      | S04      |
| .....aagggauuggagaaaucaugaggcC.....  | 1    | 1      | S04      |
| .....aagggauuggagaaaucaugaggcuu..... | 1    | 0      | S04      |
| .....agggauuggagaaaucauga.....       | 1    | 0      | S04      |
| .....agggauuggagaaaucaugaggc.....    | 5    | 0      | S04      |
| .....agggauuggagaaaucaugaggcA.....   | 3    | 1      | S04      |
| .....agggauuggagGaaaucaugaggcu.....  | 1    | 1      | S04      |
| .....Ggggauuggagaaaucaugaggcu.....   | 1    | 1      | S04      |
| .....Ngggauuggagaaaucaugaggcu.....   | 1    | 1      | S04      |
| .....agggauuggagaaaucaugaggcG.....   | 3    | 1      | S04      |
| .....agggauuggaUaaaucaugaggcu.....   | 1    | 1      | S04      |
| .....agggauuggagaaauucUugaggcu.....  | 1    | 1      | S04      |
| .....agggauuggagaaaucaugaggcu.....   | 29   | 0      | S04      |
| .....agggauuggagaaaucaAgaggcu.....   | 1    | 1      | S04      |
| .....agggauuggagaaaucaugaggcC.....   | 3    | 1      | S04      |
| .....gggauuggagaaaucaugag.....       | 1    | 0      | S04      |
| .....gggauuggagaaaucaugaggcu.....    | 1    | 0      | S04      |
| .....auuggagaaaucaugagAcuu.....      | 1    | 1      | S04      |
| .....auuggagaaaucaugaggcuug.....     | 1    | 0      | S04      |
| .....auuggagaaaucaugaggcuuguu.....   | 3    | 0      | S04      |
| .....auuggagaaaucaugaggcuuguC.....   | 1    | 1      | S04      |
| .....gagaaaucaugaggcuugucaaU.....    | 1    | 1      | S04      |

Provisional ID : chrCnn\_random\_3383305  
 Score total : 0.8  
 Score for star read(s) : 3.9  
 Score for read counts : -4.4  
 Score for mfe : 1.4  
 Score for randfold : 0  
 Score for cons. seed :  
 Total read count : 3  
 Mature read count : 2  
 Loop read count : 0  
 Star read count : 1

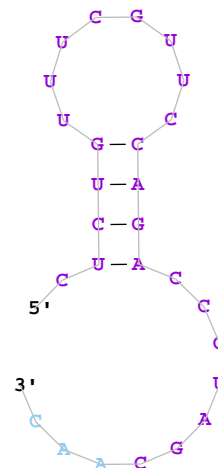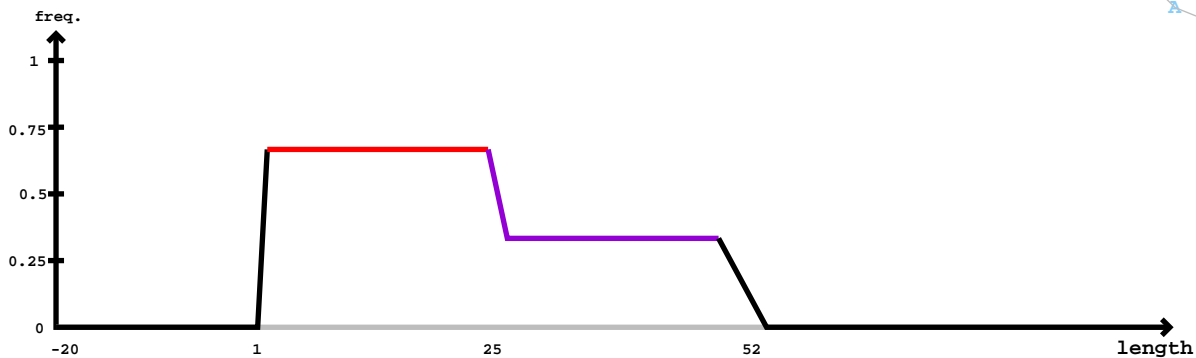

**Mature**                      **Star**

| 5'                    |                                         | -3'                     | obs                                             | exp | reads | mm  | sample |
|-----------------------|-----------------------------------------|-------------------------|-------------------------------------------------|-----|-------|-----|--------|
| uuauccucaaaaccuccgaag | <b>agcagaacgugaau</b> <b>gaaacagagc</b> | cucuguuucguuccagaccuagc | aaaccacuucgaggaaccucgggugagagguagugugguuaaaaauu |     | 1     | 0   | S03    |
| uuauccucaaaaccuccgaag | <b>agcagaacgugaau</b> <b>gaaacagagc</b> | cucuguuucguuccagaccuagc | aaaccacuucgaggaaccucgggugagagguagugugguuaaaaauu |     | 1     | 0   | S04    |
|                       | .....agcagaacgugaau                     | gaaacagagc.....         |                                                 |     | 1     | 0   | S04    |
|                       | .....cucuguuucguuccagaccuagc.....       |                         |                                                 | 1   | 0     | S04 |        |



Star

Mature

|                                 |                                  |                                            |         |    |   |
|---------------------------------|----------------------------------|--------------------------------------------|---------|----|---|
| uaucuccggaauucaucgguuuuuuccgaga | aaaucauuuuuuuccucgguauuccauaagaa | uuucugacggauugauaauuccggaauuccgucgguauauuc | ugaggaa |    |   |
|                                 |                                  | ccucggaauuccgucgguauauuc                   |         | 12 | 0 |
|                                 |                                  | cucggaauuccgucgguauauuc                    |         | 7  | 0 |
|                                 |                                  | cucggaauuccgucgguauauuc                    |         | 1  | 0 |
|                                 |                                  | cucggaauuccgucgguauG                       |         | 1  | 1 |
|                                 |                                  | cucggaauuccgucgguaua                       |         | 1  | 0 |
|                                 |                                  | cucggaauuccgucgguauau                      |         | 2  | 0 |
|                                 |                                  | cucggaauuccgucgguauGuu                     |         | 1  | 1 |
|                                 |                                  | cucggaauuccgucgguauuu                      |         | 50 | 0 |
|                                 |                                  | cucggUauuccgucgguauuu                      |         | 2  | 1 |
|                                 |                                  | cucggaauuccgucgguauauuc                    |         | 20 | 0 |
|                                 |                                  | cucggaauuccgucgguauuuuc                    |         | 7  | 0 |
|                                 |                                  | ucggaauuccgucgguauu                        |         | 1  | 0 |
|                                 |                                  | ucggaauuccgucgguauG                        |         | 1  | 1 |
|                                 |                                  | ucggaauuccgucgguaua                        |         | 7  | 0 |
|                                 |                                  | ucggaauuccgucgguauuu                       |         | 2  | 0 |
|                                 |                                  | ucggaauuccgucgguauuuu                      |         | 20 | 0 |
|                                 |                                  | ucggaauuccgucgguauuuuc                     |         | 53 | 0 |
|                                 |                                  | cggauuccgucgguaua                          |         | 1  | 0 |
|                                 |                                  | cggauuccgucgguauau                         |         | 4  | 0 |
|                                 |                                  | cggauuccgucgguauuu                         |         | 9  | 0 |
|                                 |                                  | cggauuccgucgguauuuuc                       |         | 1  | 1 |
|                                 |                                  | cggauuccgucgguauuuuc                       |         | 15 | 0 |
|                                 |                                  | ggauuccgucgguauuuu                         |         | 16 | 0 |
|                                 |                                  | ggauuccgucgguauuuuc                        |         | 4  | 0 |
|                                 |                                  | ggauuccgucgguauuuuc                        |         | 1  | 1 |
|                                 |                                  | ggauuccgucgguauuuucugag                    |         | 1  | 0 |
|                                 |                                  | gaauccgucgguauuuu                          |         | 6  | 0 |
|                                 |                                  | gaauccgucgguauuuuc                         |         | 2  | 0 |
|                                 |                                  | gaauccgucgguauuuuc                         |         | 1  | 0 |
|                                 |                                  | gaauccgucgguauuuucA                        |         | 1  | 1 |
|                                 |                                  | gaauccgucgguauuuucug                       |         | 1  | 0 |
|                                 |                                  | gGauuccgucgguauuuucug                      |         | 1  | 1 |
|                                 |                                  | aauccgucgguauuuuc                          |         | 10 | 0 |
|                                 |                                  | aauccgucgguauuuuc                          |         | 1  | 0 |
|                                 |                                  | auuccgucgguauuuuc                          |         | 3  | 0 |
|                                 |                                  | auuccgucgguauuuuc                          |         | 1  | 1 |
|                                 |                                  | auuccgucgguauuuucug                        |         | 1  | 0 |
| auccucggaauucaucgguuuuu         |                                  |                                            |         | 1  | 0 |
| auccucggaauucaucgguuuuu         |                                  |                                            |         | 1  | 0 |
| uuccucggaauucaucgguuu           |                                  |                                            |         | 1  | 0 |
| uuccucggaauucaucgguuu           |                                  |                                            |         | 2  | 0 |
| uuccucggaauucaucgguuA           |                                  |                                            |         | 1  | 1 |
| ccucggUauucaucgguuu             |                                  |                                            |         | 1  | 1 |
| ccucggauucaucgguuu              |                                  |                                            |         | 1  | 0 |
| ccucggauucaucgguuu              |                                  |                                            |         | 1  | 0 |
| ccucggauucaucgguuuCu            |                                  |                                            |         | 2  | 1 |
| ccucggauucaucgguuuuuuA          |                                  |                                            |         | 1  | 1 |
| cucggaauucaucgguuuuu            |                                  |                                            |         | 1  | 0 |
| cucggaauucaucgguuuuuuccg        |                                  |                                            |         | 1  | 0 |
| aaaucaucgguuuuuucUgaga          |                                  |                                            |         | 1  | 1 |
| aucauuuuuccgguauuccau           |                                  |                                            |         | 1  | 0 |
| acauuuuuuccgguauuccaCa          |                                  |                                            |         | 1  | 1 |
| auuuuuuccgguauuccauaaga         |                                  |                                            |         | 1  | 0 |
| uuuuuccgguauuccauaaga           |                                  |                                            |         | 2  | 0 |
| uuuuuccgguauCccauaagaau         |                                  |                                            |         | 1  | 1 |
| uucccggauuccauaagaau            |                                  |                                            |         | 1  | 0 |
| ggauuuUcauaagaauuucugacgga      |                                  |                                            |         | 1  | 1 |
| auaagaauuucugacgg               |                                  |                                            |         | 1  | 0 |
| auaagaauuucugacggauu            |                                  |                                            |         | 1  | 0 |
| aagaauuucugacggauugaC           |                                  |                                            |         | 1  | 1 |
| aagaauuucugacggaCugau           |                                  |                                            |         | 1  | 1 |
| gaaauuucugacggauugaua           |                                  |                                            |         | 1  | 0 |
| auauucugacggauuAuaauuc          |                                  |                                            |         | 1  | 1 |
| auucugacggauugauaauuccuc        |                                  |                                            |         | 1  | 0 |
| uuccucggaauuccgucgguuu          |                                  |                                            |         | 1  | 0 |
| uuccucggaauuccgucgguuu          |                                  |                                            |         | 1  | 0 |
| uuccucggaauuccgucgguuG          |                                  |                                            |         | 4  | 1 |
| uuccucggaauuccgucgguuu          |                                  |                                            |         | 1  | 0 |
| uuccucggaauuccgucgguuu          |                                  |                                            |         | 1  | 0 |



Provisional ID : chrCnn\_random\_3402539  
 Score total : 0.8  
 Score for star read(s) : -1.3  
 Score for read counts : 0  
 Score for mfe : 2.1  
 Score for randfold : 0  
 Score for cons. seed :  
 Total read count : 138  
 Mature read count : 138  
 Loop read count : 0  
 Star read count : 0

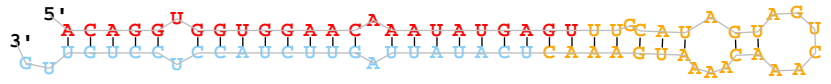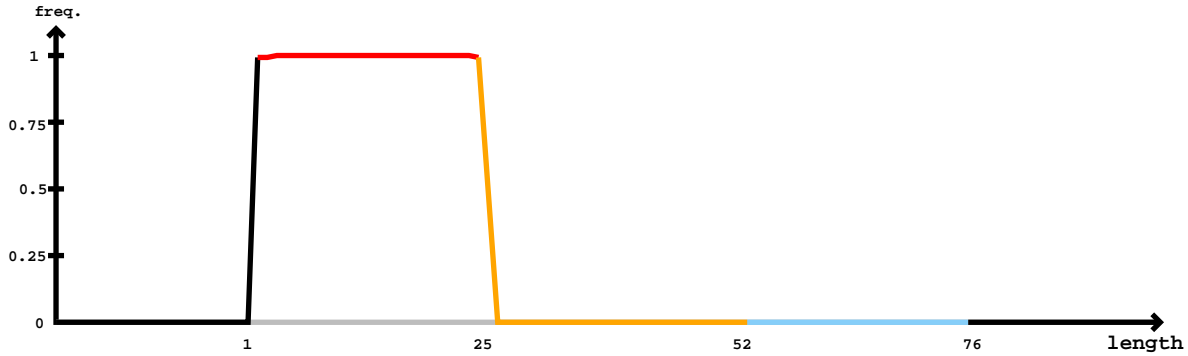

**Mature**

**Star**

| 5'                                            | reads | exp | sample |
|-----------------------------------------------|-------|-----|--------|
| gaagauuaaguguguaauuaacaggugguggaacaaaauaugagu | 4     | 0   | S03    |
| acaggugguggaacaaaauaugagu                     | 1     | 0   | S04    |
| acagguggCggaacaaaauaugagu                     | 1     | 1   | S04    |
| aUaggugguggaacaaaauaugagu                     | 1     | 1   | S04    |
| acaggugguggaacaaaauaugagA                     | 3     | 1   | S04    |
| Ucaggugguggaacaaaauaugagu                     | 1     | 1   | S04    |
| acaggugguggaacaaaauaugagu                     | 116   | 0   | S04    |
| acaggugguggaacaaaauaugagC                     | 6     | 1   | S04    |
| acaggugguggaacaaaauaugagG                     | 3     | 1   | S04    |
| acaggugguggaaAaaaauaugagu                     | 1     | 1   | S04    |
| aggugguggaacaaaauGgagu                        | 1     | 1   | S04    |

Provisional ID : chrCnn\_random\_3412638  
 Score total : 0.8  
 Score for star read(s) : 3.9  
 Score for read counts : -4.4  
 Score for mfe : 1.4  
 Score for randfold : 0  
 Score for cons. seed :  
 Total read count : 3  
 Mature read count : 2  
 Loop read count : 0  
 Star read count : 1

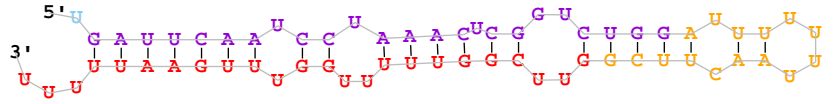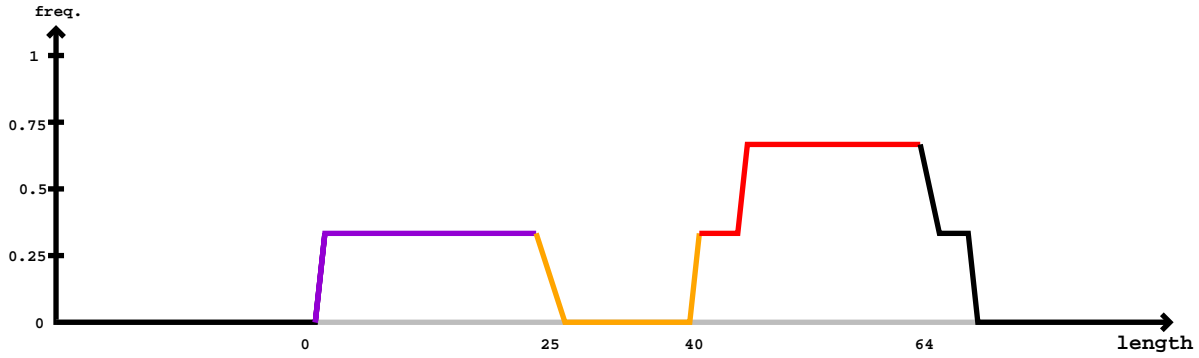

**Star**

**Mature**

| 5' -                      | Star                    | Mature                                 | -3'                       | obs | exp | reads | mm | sample |
|---------------------------|-------------------------|----------------------------------------|---------------------------|-----|-----|-------|----|--------|
| aucgaucggguacggauaucgggac | gauucaauccuaaacucggucug | gauuuuuuuuacucggucgguuuuugguuuugauuuuu | cgguucggguucgggcuggguuucg | 1   | 0   | 1     | 0  | S03    |
| aucgaucggguacggauaucgggac | gauucaauccuaaacucggucug | gauuuuuuuuacucggucgguuuuugguuuugauuuuu | cgguucggguucgggcuggguuucg | 1   | 1   | 1     | 1  | S04    |
| .....                     | .....                   | .....                                  | .....                     | 1   | 0   | 1     | 0  | S04    |



Provisional ID : chrCnn\_random\_3424638  
 Score total : 0.1  
 Score for star read(s) : -1.3  
 Score for read counts : 0  
 Score for mfe : 1.4  
 Score for randfold : 0  
 Score for cons. seed :  
 Total read count : 117  
 Mature read count : 117  
 Loop read count : 0  
 Star read count : 0



**Mature** **Star**

| 5' -                                                                                                                 | reads | mm | sample |
|----------------------------------------------------------------------------------------------------------------------|-------|----|--------|
| gcgguuuccgguuaccucgagcugcgguuugauggugaugacgagcucugacgagcucgucggcgugcgguggucuccgagaggacucuuuggugagcuuucucucucucucucuu | 1     | 0  | S03    |
| .....ugcgguuugauggugaugacgag.....                                                                                    | 1     | 0  | S03    |
| .....ugauggugaugacgagcuugacCa.....                                                                                   | 1     | 1  | S03    |
| .....augacgagcucugacgagcu.....                                                                                       | 1     | 0  | S03    |
| .....ugacgagcucugacgagcucuggc.....                                                                                   | 4     | 0  | S03    |
| .....acgagcucugacgagcCccugg.....                                                                                     | 1     | 1  | S03    |
| .....acgagcucugacgagcucugg.....                                                                                      | 13    | 0  | S03    |
| .....acgagcucugacgagcucuggC.....                                                                                     | 1     | 1  | S03    |
| .....acgagcucugacgagcucuggc.....                                                                                     | 4     | 0  | S03    |
| .....cgagcucugacgagcucugg.....                                                                                       | 1     | 0  | S03    |
| .....cgagcucugacgagcCccuggc.....                                                                                     | 1     | 1  | S03    |
| .....cgagcucugacgagcucuggc.....                                                                                      | 12    | 0  | S03    |
| .....cgagcucugacgagcucuggA.....                                                                                      | 1     | 1  | S03    |
| .....cgagcucugacgagcucuggG.....                                                                                      | 2     | 1  | S03    |
| .....cgagcuuAacgagcucuggcg.....                                                                                      | 1     | 1  | S03    |
| .....cgagcucugacgagcucuggcgug.....                                                                                   | 6     | 0  | S03    |
| .....cgaUcugacgagcucuggcgug.....                                                                                     | 1     | 1  | S03    |
| .....gagcucugacgagcucuggc.....                                                                                       | 1     | 0  | S03    |
| .....agcucugacgagcucuggcgug.....                                                                                     | 1     | 0  | S03    |
| .....cuugacgagcucuggcgug.....                                                                                        | 1     | 0  | S03    |
| .....cuugacgagcucuggcgugc.....                                                                                       | 10    | 0  | S03    |
| .....cuugacgagcucuggcgugA.....                                                                                       | 2     | 1  | S03    |
| .....cuugacgagcucuggcgugG.....                                                                                       | 1     | 1  | S03    |
| .....uugacgagcucuggcgug.....                                                                                         | 1     | 0  | S03    |
| .....cuccggcgaggacucuuuggugagc.....                                                                                  | 1     | 0  | S03    |
| gcgguuuccgguuaccucgagc.....                                                                                          | 1     | 0  | S04    |
| .....uugauggugaugacgagcucuu.....                                                                                     | 1     | 0  | S04    |
| .....ugauggugaugacgagcucugacA.....                                                                                   | 1     | 1  | S04    |
| .....gugaugacgagcucugacAacgu.....                                                                                    | 1     | 1  | S04    |
| .....gaugacgagcucugacgaUgucucug.....                                                                                 | 1     | 1  | S04    |
| .....ugacgagcucugacgagcu.....                                                                                        | 1     | 0  | S04    |
| .....ugacgagcucugacgagcucugg.....                                                                                    | 1     | 0  | S04    |
| .....ugacgagcucugacgagcucuggc.....                                                                                   | 1     | 0  | S04    |
| .....gacgagcucugacgagcucug.....                                                                                      | 1     | 0  | S04    |

Mature

Star

|                                          |                                                             |                 |   |   |
|------------------------------------------|-------------------------------------------------------------|-----------------|---|---|
| gcgguuuccgguuaccucgagcugcgguuugauggugaug | acgagcugacgacgucuccuggcggugcgguggcucggcgaggacucuggugagcuuuc | cucucucucucucuu |   |   |
| .....                                    | acgagcuugacgacgucucg.....                                   |                 | 1 | 0 |
| .....                                    | acgagcuugGcgacgucugg.....                                   |                 | 1 | 1 |
| .....                                    | acgagcugacgacgucuccgg.....                                  |                 | 9 | 0 |
| .....                                    | acgagcugacgacgucuccggA.....                                 |                 | 1 | 1 |
| .....                                    | acgagcuugacgacgucuccggc.....                                |                 | 1 | 0 |
| .....                                    | cgagcugacgacgucuccggA.....                                  |                 | 1 | 1 |
| .....                                    | cgagcugacgacgucuccggc.....                                  |                 | 7 | 0 |
| .....                                    | cgagcuugacCacgucuccggc.....                                 |                 | 1 | 1 |
| .....                                    | cgagcugacgCcgucuccggc.....                                  |                 | 1 | 1 |
| .....                                    | cgagcuugacgacguAcuccggc.....                                |                 | 1 | 1 |
| .....                                    | cgagcuugacgacgucuccggcguA.....                              |                 | 1 | 1 |
| .....                                    | cgagcugacgacgucuccggcgug.....                               |                 | 3 | 0 |
| .....                                    | gagcugacgacgucuccggcg.....                                  |                 | 1 | 0 |
| .....                                    | gagcuugacgacgucuccggcgug.....                               |                 | 1 | 0 |
| .....                                    | gagcuugacAacgucuccggcgugc.....                              |                 | 1 | 1 |
| .....                                    | agcuugacgacgucuccggcgug.....                                |                 | 2 | 0 |
| .....                                    | gcuugacgacgucuccggcguA.....                                 |                 | 1 | 1 |
| .....                                    | cuugacgacgucuccggcgug.....                                  |                 | 1 | 0 |
| .....                                    | cuugacgacgucuccggcgugc.....                                 |                 | 8 | 0 |
| .....                                    | cuugacgacgucuccggcgugG.....                                 |                 | 3 | 1 |
| .....                                    | cuugacgacgucuccggcgugA.....                                 |                 | 1 | 1 |
| .....                                    | cuugacAacgucuccggcgugc.....                                 |                 | 1 | 1 |
| .....                                    | uggcgugcgguggcuccggcA.....                                  |                 | 1 | 1 |
| .....                                    | gcuccggcgagAacucugguga.....                                 |                 | 1 | 1 |
| .....                                    | uccggcgagAacucuggugagcu.....                                |                 | 1 | 1 |



Provisional ID : chrCnn\_random\_3435259  
 Score total : 0.3  
 Score for star read(s) : -1.3  
 Score for read counts : 0  
 Score for mfe : 1.6  
 Score for randfold : 0  
 Score for cons. seed :  
 Total read count : 59  
 Mature read count : 59  
 Loop read count : 0  
 Star read count : 0

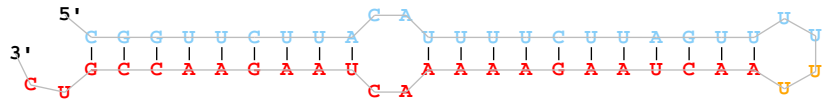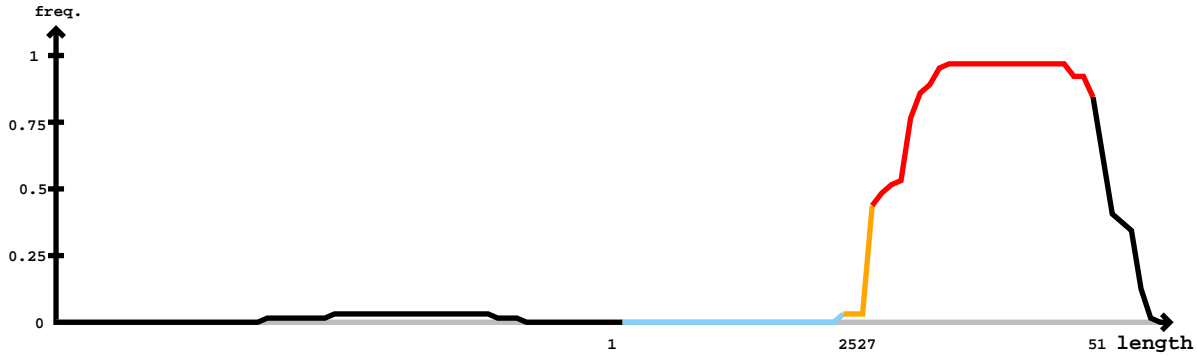

Star Mature

| 5'  | Star                                                             | Mature                  | -3'      | exp   | reads  | mm     | sample   |  |
|-----|------------------------------------------------------------------|-------------------------|----------|-------|--------|--------|----------|--|
| 5'- | uaauagaccauauaacuauucucuuaacuggaguucuuagcuucagauaagaaa           | cgguucuuacuuuuucuaguuuu | uaacuaga | aaaaa | cuaaga | accguc | cucuuaaa |  |
|     | .....(((((((.....)))))))(.....(((((((.....)))))))(.....))))..... | .....uuuuaacuaga        |          |       |        |        |          |  |
|     | .....aacuaag                                                     |                         |          |       | 1      | 1      | S03      |  |
|     | .....aacuaag                                                     |                         |          |       | 1      | 0      | S03      |  |
|     | .....aacuaag                                                     |                         |          |       | 2      | 0      | S03      |  |
|     | .....acuaga                                                      |                         |          |       | 1      | 0      | S03      |  |
|     | .....cuaaga                                                      |                         |          |       | 1      | 0      | S03      |  |
|     | .....uaag                                                        |                         |          |       | 1      | 0      | S03      |  |
|     | .....aag                                                         |                         |          |       | 1      | 1      | S03      |  |
|     | .....aag                                                         |                         |          |       | 2      | 0      | S03      |  |
|     | .....aag                                                         |                         |          |       | 1      | 1      | S03      |  |
|     | .....g                                                           |                         |          |       | 1      | 1      | S03      |  |
|     | .....aaa                                                         |                         |          |       | 1      | 1      | S03      |  |
|     | .....auucucuuaacuggaguucuuagc                                    |                         |          |       | 1      | 0      | S04      |  |
|     | .....uaacuggaguucuuagcuuc                                        |                         |          |       | 1      | 0      | S04      |  |
|     | .....uuuuaacuaga                                                 |                         |          |       | 1      | 0      | S04      |  |
|     | .....aacuaag                                                     |                         |          |       | 4      | 0      | S04      |  |
|     | .....Gacuaga                                                     |                         |          |       | 1      | 1      | S04      |  |
|     | .....aacuaag                                                     |                         |          |       | 1      | 1      | S04      |  |
|     | .....aacuaag                                                     |                         |          |       | 17     | 0      | S04      |  |
|     | .....acuaga                                                      |                         |          |       | 1      | 0      | S04      |  |
|     | .....acuaga                                                      |                         |          |       | 1      | 1      | S04      |  |
|     | .....cuaaga                                                      |                         |          |       | 1      | 0      | S04      |  |
|     | .....aag                                                         |                         |          |       | 1      | 1      | S04      |  |
|     | .....aag                                                         |                         |          |       | 1      | 0      | S04      |  |
|     | .....aag                                                         |                         |          |       | 1      | 1      | S04      |  |
|     | .....aag                                                         |                         |          |       | 1      | 0      | S04      |  |
|     | .....aag                                                         |                         |          |       | 1      | 1      | S04      |  |
|     | .....aag                                                         |                         |          |       | 1      | 1      | S04      |  |
|     | .....aag                                                         |                         |          |       | 3      | 0      | S04      |  |
|     | .....aag                                                         |                         |          |       | 1      | 1      | S04      |  |
|     | .....ag                                                          |                         |          |       | 1      | 1      | S04      |  |
|     | .....ag                                                          |                         |          |       | 1      | 0      | S04      |  |
|     | .....ag                                                          |                         |          |       | 1      | 0      | S04      |  |

Star

Mature

|                                                                                                                                                                                                       |   |   |     |
|-------------------------------------------------------------------------------------------------------------------------------------------------------------------------------------------------------|---|---|-----|
| uauuagacc <u>cau</u> uuaac <u>ucau</u> ucucuuaacuggag <u>uucuu</u> agcuucagauaagaaa <u>cggu</u> u <u>ucau</u> uuu <u>cuu</u> aguuuu <u>uu</u> aa <u>cu</u> agaaaa <u>cu</u> agaaccguc <u>ucu</u> uaaa |   |   |     |
| .....agaaaa <u>cu</u> agaaccguc <u>ucu</u> Ca..                                                                                                                                                       | 1 | 1 | S04 |
| .....agaaaa <u>cu</u> agaaccguc <u>ucu</u> G..                                                                                                                                                        | 2 | 1 | S04 |
| .....gaaaa <u>cu</u> agaaccguc <u>ucu</u> Ca..                                                                                                                                                        | 1 | 1 | S04 |
| .....aaaa <u>cu</u> agaaccguc <u>u</u> .....                                                                                                                                                          | 1 | 0 | S04 |
| .....aaaa <u>cu</u> agaaccguc <u>ucu</u> ..                                                                                                                                                           | 2 | 0 | S04 |
| .....aaaa <u>cu</u> agaaccguc <u>ucu</u> aa.                                                                                                                                                          | 1 | 0 | S04 |

Provisional ID : chrCnn\_random\_3435782  
 Score total : 11.6  
 Score for star read(s) : 3.9  
 Score for read counts : 5.7  
 Score for mfe : 1.9  
 Score for randfold : 0  
 Score for cons. seed :  
 Total read count : 23  
 Mature read count : 16  
 Loop read count : 1  
 Star read count : 6

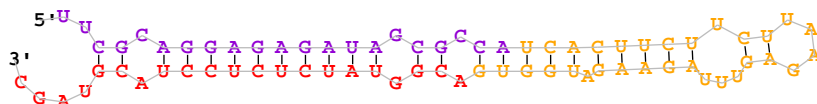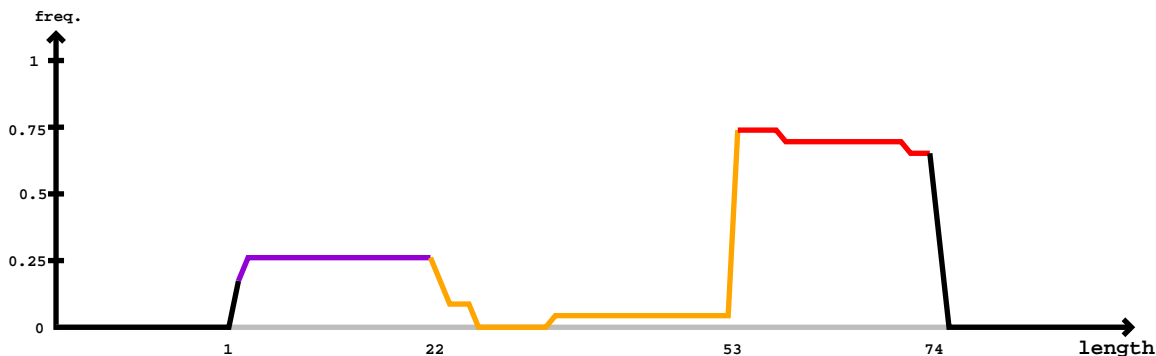

**Star**

**Mature**

| 5' -             | Star                               | Mature                             | -3'                             | obs                 | exp | reads | mm  | sample |
|------------------|------------------------------------|------------------------------------|---------------------------------|---------------------|-----|-------|-----|--------|
| ugcaaaaaggguucgc | uucgcaggagagauagcgcca              | ucacuuucuuuagaguuuagaagauggug      | acgguaucucuccuacguagc           | aaucuuauuaauggcgucu |     | 1     | 0   | S03    |
| ugcaaaaaggguucgc | uucgcaggagagauagcgcca              | ucacuuucuuuagaguuuagaagauggug      | acgguaucucuccuacguagc           | aaucuuauuaauggcgucu |     | 1     | 0   | S03    |
|                  | .....uucgcaggagagauagcgcca.....    |                                    | .....acgguaucucuccuacgu.....    |                     | 1   | 0     | S03 |        |
|                  | .....ucgcaggagagauagcgccaacac..... |                                    | .....Gcgguaucucuccuacguagc..... |                     | 1   | 1     | S03 |        |
|                  |                                    |                                    | .....acgguaucucuccuacguagU..... |                     | 1   | 1     | S03 |        |
|                  |                                    |                                    | .....acgguaucucuccuacguagc..... |                     | 5   | 0     | S03 |        |
|                  | .....uucgcaggagagauagcgccG.....    |                                    |                                 |                     | 1   | 1     | S04 |        |
|                  | .....uucgcaggagagauagcgccU.....    |                                    |                                 |                     | 1   | 1     | S04 |        |
|                  | .....uucgcaggagagauagcgcca.....    |                                    |                                 |                     | 1   | 0     | S04 |        |
|                  | .....ucgcaggagagauagcgccaucA.....  |                                    |                                 |                     | 1   | 1     | S04 |        |
|                  |                                    | .....aagaguuuagaagauggugacggA..... |                                 |                     | 1   | 1     | S04 |        |
|                  |                                    |                                    | .....acgguaucucuccuacguagA..... |                     | 1   | 1     | S04 |        |
|                  |                                    |                                    | .....acgguaucucuccuacguagU..... |                     | 1   | 1     | S04 |        |
|                  |                                    |                                    | .....acgguaucucuccuacguagc..... |                     | 6   | 0     | S04 |        |

Provisional ID : chrCnn\_random\_3439035  
 Score total : 0.4  
 Score for star read(s) : -1.3  
 Score for read counts : 0  
 Score for mfe : 1.7  
 Score for randfold : 0  
 Score for cons. seed :  
 Total read count : 98  
 Mature read count : 96  
 Loop read count : 2  
 Star read count : 0

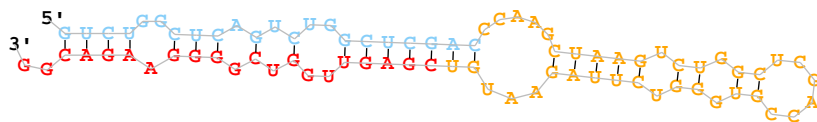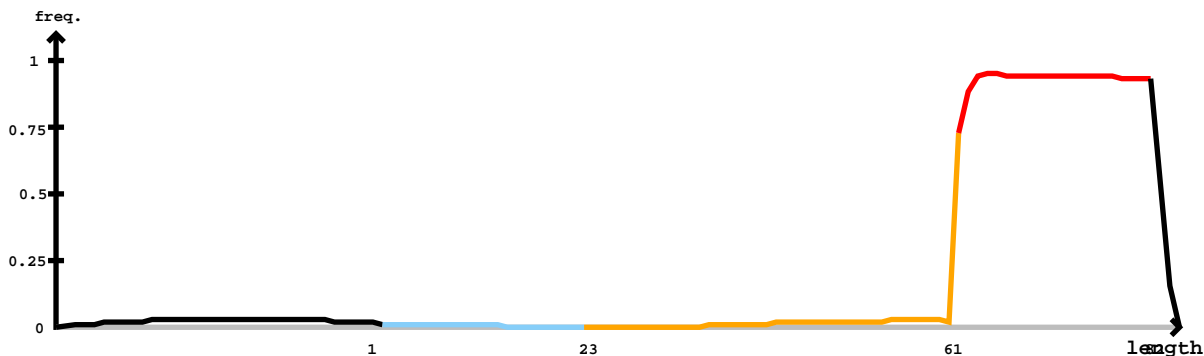

**Star**

**Mature**

| 5'                                                                                                                     | 3' | exp | reads | mm | sample |
|------------------------------------------------------------------------------------------------------------------------|----|-----|-------|----|--------|
| guaaagauaaggacgcuugcaggacugucugggucuggcucagucuggcucgacccaagcuaaagucuggcucgaccgugggucuuagaauugucgagauuggucggggaagacgggc |    |     |       |    |        |
| .....((((((..(.....).)))))..(((..(((..(((.....(((.....(((.....).).)))))..)))))..).))..))....                           |    |     |       |    |        |
| ...aagauaaggacgcuugcaggacug.....                                                                                       |    |     | 1     | 0  | S03    |
| .....aggacugucugggucuggcucaguc.....                                                                                    |    |     | 1     | 0  | S03    |
| .....cgauuggucgggAaagacggg..                                                                                           |    |     | 11    | 1  | S03    |
| .....cgauuggucgggAaagacggg..                                                                                           |    |     | 12    | 1  | S03    |
| .....cgauuggucgggAaagacgggc                                                                                            |    |     | 1     | 1  | S03    |
| .....gaguuggucgggAaagacggg..                                                                                           |    |     | 2     | 1  | S03    |
| .....gaguuggucgggAaagacggg..                                                                                           |    |     | 2     | 1  | S03    |
| .....gaguuggucgggAaagacgggc                                                                                            |    |     | 2     | 1  | S03    |
| .....guuggucgggAaagacggg..                                                                                             |    |     | 1     | 1  | S03    |
| Auaaagauaaggacgcuugc.....                                                                                              |    |     | 1     | 1  | S04    |
| .....aaggacgcuugcGggacugucugg.....                                                                                     |    |     | 1     | 1  | S04    |
| .....uggcucgaccgugggucuuagaauug.....                                                                                   |    |     | 1     | 0  | S04    |
| .....accgugggucuuAaaugucgagu.....                                                                                      |    |     | 1     | 1  | S04    |
| .....agaauugcagauuggucggggaag.....                                                                                     |    |     | 1     | 0  | S04    |
| .....cgauuggucgggAaagacggg..                                                                                           |    |     | 31    | 1  | S04    |
| .....cgauuggucgggAaagacggg..                                                                                           |    |     | 17    | 1  | S04    |
| .....cgauuggucgggAaagacgggc                                                                                            |    |     | 1     | 1  | S04    |
| .....gaguuggucgggAaagacggg..                                                                                           |    |     | 2     | 1  | S04    |
| .....gaguuggucgggAaagacgggc                                                                                            |    |     | 8     | 1  | S04    |
| .....aguuggucgggAaagacggg..                                                                                            |    |     | 2     | 1  | S04    |
| .....aguuggucgggAaagacgggc                                                                                             |    |     | 4     | 1  | S04    |





Star

Mature

agaugguacauucagcguuuaucaucugguacaagauugaugggcauuaaaacagauuaauuuuggcugaagacuguguggauacgauugcugauuuuguaaaagauuuucu

|                                         |    |   |     |
|-----------------------------------------|----|---|-----|
| .....aaacagauuaauuuuggcuga.....         | 1  | 0 | S03 |
| .....aacagauuaauuuuggcugaag.....        | 1  | 0 | S03 |
| .....aacagauuaauuuuggcugaaga.....       | 2  | 0 | S03 |
| .....aacagauuaauuuuggcugaagacugugu..... | 1  | 0 | S03 |
| .....acagauuaauuuuggcugaaga.....        | 2  | 0 | S03 |
| .....acagauuaauuuuggcugaagac.....       | 2  | 0 | S03 |
| .....acagauuaauuuuggcugaagacu.....      | 1  | 0 | S03 |
| .....cagauuaauuuuggcugaagacu.....       | 4  | 0 | S03 |
| .....agauuaauuuuggcugaaga.....          | 2  | 0 | S03 |
| .....agauuaauuuuggcugaagacu.....        | 11 | 0 | S03 |
| .....agauuaauuuuggcugaagacC.....        | 1  | 1 | S03 |
| .....agauuaauuuuggcugaagacA.....        | 2  | 1 | S03 |
| .....agauuaauuuuggcugaaAacug.....       | 1  | 1 | S03 |
| .....agauuaauuuuggcugaagacuU.....       | 1  | 1 | S03 |
| .....agauuaGuuuuggcugaagacug.....       | 2  | 1 | S03 |
| .....agauuaauuuuggcugaagacug.....       | 46 | 0 | S03 |
| .....Ugauuaauuuuggcugaagacug.....       | 1  | 1 | S03 |
| .....agauuaaaCuuggcugaagacug.....       | 1  | 1 | S03 |
| .....agaCuuaauuuuggcugaagacug.....      | 1  | 1 | S03 |
| .....agauuaauuuuggcugaagacugU.....      | 1  | 0 | S03 |
| .....gauuaauuuuggcugaagac.....          | 1  | 0 | S03 |
| .....gauuaauuuuggcugaagacA.....         | 1  | 1 | S03 |
| .....gauuaauuuuggcugaagacu.....         | 6  | 0 | S03 |
| .....gCuuaauuuuggcugaagacug.....        | 1  | 1 | S03 |
| .....gauuaGuuuuggcugaagacug.....        | 1  | 1 | S03 |
| .....gauuaauuuuggcugaagacuU.....        | 1  | 1 | S03 |
| .....gauuaauuuuggcugaagacug.....        | 15 | 0 | S03 |
| .....gauuaauuuCgcugaagacugU.....        | 1  | 1 | S03 |
| .....gauuaauuuuggcugaagacugU.....       | 33 | 0 | S03 |
| .....gauuaaaCuuggcugaagacugU.....       | 1  | 1 | S03 |
| .....gauuaauuuuggcugaagacugC.....       | 4  | 1 | S03 |
| .....gauuaauuuuggcugaagacugA.....       | 2  | 1 | S03 |
| .....gauuaauCuuggcugaagacugU.....       | 2  | 1 | S03 |
| .....auuaauuuuggcugaagacu.....          | 5  | 0 | S03 |
| .....auuaauuuuggcugaagacuC.....         | 1  | 1 | S03 |
| .....auuaauuuuggcugUagacug.....         | 1  | 1 | S03 |
| .....auuGuauuuuggcugaagacug.....        | 1  | 1 | S03 |
| .....auuaauuuuggcugaagacuU.....         | 1  | 1 | S03 |
| .....auuaauuuuggcugaagacug.....         | 31 | 0 | S03 |
| .....auuaauuuuggcugaagacugA.....        | 1  | 1 | S03 |
| .....auuaauuuuggcugaagacugU.....        | 4  | 0 | S03 |
| .....auuaauuuuggcugaagacugug.....       | 24 | 0 | S03 |
| .....auuaauCuuggcugaagacugug.....       | 1  | 1 | S03 |
| .....CuuaauuuuggcugaagacugugU.....      | 1  | 1 | S03 |
| .....uuuaauuuuggcugaagacu.....          | 2  | 0 | S03 |
| .....uuuaauuuuggcugaagacug.....         | 30 | 0 | S03 |
| .....Cuuaauuuuggcugaagacug.....         | 1  | 1 | S03 |
| .....uuuaaaCuuggcugaagacugU.....        | 1  | 1 | S03 |
| .....uuuaauuuuggcugaagacugA.....        | 2  | 1 | S03 |
| .....uuuaauuuuggcugaagacugG.....        | 1  | 1 | S03 |
| .....uuuaauuuuggcugaagacugU.....        | 57 | 0 | S03 |
| .....uuuaGuuuuggcugaagacugU.....        | 1  | 1 | S03 |
| .....uuuaauuuuggcugaGgacugug.....       | 1  | 1 | S03 |
| .....uuuaauuuuggcugaagacugug.....       | 19 | 0 | S03 |
| .....uuuaauuuuggcugaagacugugG.....      | 9  | 1 | S03 |
| .....uGauuaauuuuggcugaagacugugU.....    | 2  | 1 | S03 |
| .....uuuCaauuuuggcugaagacugugU.....     | 1  | 1 | S03 |
| .....uuuaauuuuggcugaagacugugA.....      | 13 | 1 | S03 |
| .....uCauuaauuuuggcugaagacugugU.....    | 3  | 1 | S03 |
| .....uuauGauuuuggcugaagacugugU.....     | 1  | 1 | S03 |
| .....uuuaauuuuggcugCagacugugU.....      | 1  | 1 | S03 |
| .....uuuaauuuuggcugaGgacugugU.....      | 1  | 1 | S03 |
| .....uuuaauuuuggcugaagCugugU.....       | 1  | 1 | S03 |
| .....CuuaauuuuggcugaagacugugU.....      | 4  | 1 | S03 |
| .....uuuaauuuuggcugaagacugugC.....      | 27 | 1 | S03 |
| .....GuuaauuuuggcugaagacugugU.....      | 1  | 1 | S03 |
| .....uuuaauuuuggcugaagacugugU.....      | 82 | 0 | S03 |
| .....uuuaauuuuggcugaagacAgugU.....      | 1  | 1 | S03 |
| .....uuuaauuuuggGugaagacugugU.....      | 2  | 1 | S03 |
| .....uuuaaaCuuggcugaagacugugU.....      | 2  | 1 | S03 |

Star

Mature

agauggucauucagcuuuaucaucugguacaagauugaugggcauuaaaacagauuuaauuuggcugaagacuguguggauacgauugcugauuuuguaaaagauauucu

|                                     |     |   |     |
|-------------------------------------|-----|---|-----|
| .....uuuaauuuggcugaagacugugug.....  | 1   | 0 | S03 |
| .....uauuuuuggcugaagacug.....       | 5   | 0 | S03 |
| .....uauuuuuggcugaagacug.....       | 6   | 0 | S03 |
| .....uauuuuuggcugaagacugug.....     | 1   | 1 | S03 |
| .....uauuuuuggcugaagacugug.....     | 19  | 0 | S03 |
| .....uauuuuuggcugaagacugugC.....    | 4   | 1 | S03 |
| .....uauuuuuggcugaagacugug.....     | 19  | 0 | S03 |
| .....uauuuuuggcugaagacugugug.....   | 1   | 1 | S03 |
| .....uauuuuuggcugaagacugugug.....   | 1   | 1 | S03 |
| .....uauuuuuggcugaagacugugug.....   | 45  | 0 | S03 |
| .....uauuuuuggcugaagacugAgug.....   | 2   | 1 | S03 |
| .....auuuuuggcugaagacA.....         | 1   | 1 | S03 |
| .....auuuuuggcugaagacu.....         | 2   | 0 | S03 |
| .....auuuuuggcugaagacug.....        | 6   | 0 | S03 |
| .....auuuuuggcugaagacug.....        | 7   | 0 | S03 |
| .....auuuuuggcugaagacugG.....       | 1   | 1 | S03 |
| .....auuuuuggcugaagacugug.....      | 1   | 1 | S03 |
| .....auuuuuggcugaagacugug.....      | 1   | 1 | S03 |
| .....auuuuuggcugaagacugug.....      | 41  | 0 | S03 |
| .....auuuuuggcugaagacugugC.....     | 8   | 1 | S03 |
| .....auuuuuggcugaagacugugA.....     | 2   | 1 | S03 |
| .....auuuuuggcugaagacugug.....      | 1   | 1 | S03 |
| .....auuuuuggcugaagacugug.....      | 1   | 1 | S03 |
| .....auuuuuggcugaagacugug.....      | 125 | 0 | S03 |
| .....auuuuuggcugaagacugugG.....     | 6   | 1 | S03 |
| .....auuuuuggcugaagacugug.....      | 3   | 1 | S03 |
| .....auuuuuggcugaagacugugug.....    | 19  | 0 | S03 |
| .....auuuuuggcugaagacugugugC.....   | 1   | 1 | S03 |
| .....auuuuuggcugaagacugugug.....    | 1   | 1 | S03 |
| .....auuuuuggcugaagacugugug.....    | 33  | 0 | S03 |
| .....auuuuuggcugaagacugugGgg.....   | 1   | 1 | S03 |
| .....auuuuuggcugaagacugugug.....    | 1   | 1 | S03 |
| .....auuuuuggcugaagacugugugga.....  | 2   | 0 | S03 |
| .....uuuuuuggcugaagacugug.....      | 2   | 0 | S03 |
| .....uGauuuuggcugaagacugug.....     | 1   | 1 | S03 |
| .....uuuuuuggcugaagacugugC.....     | 2   | 1 | S03 |
| .....uuuuuuggcugaagacugugG.....     | 1   | 1 | S03 |
| .....uuuuuuggcugaagacugug.....      | 4   | 0 | S03 |
| .....uuuuuuggcugaagacugugug.....    | 10  | 0 | S03 |
| .....uuuuuuggcugaagacugugugga.....  | 4   | 0 | S03 |
| .....auuuuuggcugaagacugugC.....     | 1   | 1 | S03 |
| .....auuuuuggcugaagacugug.....      | 4   | 0 | S03 |
| .....auuuuuggcugaagacugugG.....     | 3   | 1 | S03 |
| .....auuuuuggcugaagacugug.....      | 1   | 1 | S03 |
| .....auuuuuggcugaagacugugug.....    | 16  | 0 | S03 |
| .....auuuuuggcugaagacugugug.....    | 1   | 1 | S03 |
| .....Gauuuuggcugaagacugugug.....    | 1   | 1 | S03 |
| .....auuuuuggcugaagacugugug.....    | 1   | 0 | S03 |
| .....auuuuuggcugaagacugugug.....    | 1   | 1 | S03 |
| .....auuuuuggcugaagacugugugC.....   | 1   | 1 | S03 |
| .....auuuuuggcugaagacugugugga.....  | 1   | 0 | S03 |
| .....auuuuuggcugaagacugugugga.....  | 18  | 0 | S03 |
| .....auuuuuggcAgaagacugugugau.....  | 1   | 1 | S03 |
| .....auuuuuggcugaagacugugugau.....  | 1   | 0 | S03 |
| .....auuuuuggcugaagacugug.....      | 1   | 0 | S03 |
| .....auuuuuggcugaagacugug.....      | 4   | 0 | S03 |
| .....auuuuuggcugaagacugugug.....    | 1   | 0 | S03 |
| .....auuuuuggcugaagacugugug.....    | 3   | 0 | S03 |
| .....auuuuuggcugaagacugugugga.....  | 1   | 1 | S03 |
| .....auuuuuggcugaagacugugugga.....  | 2   | 0 | S03 |
| .....auuuuuggcugaagacuguguggaC..... | 1   | 1 | S03 |
| .....Nuuuuggcugaagacugugugga.....   | 1   | 1 | S03 |
| .....auuuuuggcugaagacugugugga.....  | 7   | 0 | S03 |
| .....auuuuuggAcugaagacugugugga..... | 1   | 1 | S03 |
| .....auuuuuggcugaagacugugugga.....  | 2   | 0 | S03 |
| .....uuuuuuggcugaagacugAg.....      | 1   | 1 | S03 |
| .....uuuuuuggcugaagacugug.....      | 2   | 0 | S03 |
| .....uuuuuuggcugaagacugugG.....     | 1   | 1 | S03 |
| .....uuuuuuggcugaagacugugC.....     | 2   | 1 | S03 |
| .....uuuuuuggcugaagacugugugga.....  | 2   | 0 | S03 |
| .....uuuuuuggcugaagacugugugU.....   | 1   | 1 | S03 |

Star

Mature

|                            |                           |    |   |     |
|----------------------------|---------------------------|----|---|-----|
| agauggucauucagcuuuaucaucug | uuuggcugaagacuguguggau    | 8  | 0 | S03 |
| uuuggcugaGgacuguguggau     | uuuggcugaGgacuguguggau    | 1  | 1 | S03 |
| uuuggcugaagacuguguggaC     | uuuggcugaagacuguguggaC    | 1  | 1 | S03 |
| uuuggcugaagacuguguggaUC    | uuuggcugaagacuguguggaUC   | 2  | 1 | S03 |
| uuuggcugaagCguguguggaua    | uuuggcugaagCguguguggaua   | 1  | 1 | S03 |
| uuuggcugaagacCguguguggaua  | uuuggcugaagacCguguguggaua | 1  | 1 | S03 |
| uAuggcugaagacuguguggaua    | uAuggcugaagacuguguggaua   | 1  | 1 | S03 |
| uuuggcugaagacuguguggaua    | uuuggcugaagacuguguggaua   | 17 | 0 | S03 |
| uuuggcugaagacugugugAuaa    | uuuggcugaagacugugugAuaa   | 1  | 1 | S03 |
| uuuggcugaagacuguguggauac   | uuuggcugaagacuguguggauac  | 2  | 0 | S03 |
| uuggcugaagacugugug         | uuggcugaagacugugug        | 1  | 0 | S03 |
| uuggcugaagacuguguggau      | uuggcugaagacuguguggau     | 2  | 0 | S03 |
| uuggcugaagacuguguggaua     | uuggcugaagacuguguggaua    | 2  | 0 | S03 |
| Cggcugaagacugugugg         | Cggcugaagacugugugg        | 1  | 1 | S03 |
| uggcugaagacuguguggau       | uggcugaagacuguguggau      | 1  | 0 | S03 |
| uggcugaagacuguguggaUC      | uggcugaagacuguguggaUC     | 1  | 1 | S03 |
| ggcugaagacugugugga         | ggcugaagacugugugga        | 1  | 0 | S03 |
| ggcugaagacuguguggU         | ggcugaagacuguguggU        | 1  | 1 | S03 |
| ggcugaagacuguguggaUC       | ggcugaagacuguguggaUC      | 1  | 1 | S03 |
| gAcugaagacuguguggaua       | gAcugaagacuguguggaua      | 1  | 1 | S03 |
| gcugaagacuguguggau         | gcugaagacuguguggau        | 1  | 0 | S03 |
| gcugaagacuguguggU          | gcugaagacuguguggU         | 1  | 1 | S03 |
| gcugaagacuguguggauacA      | gcugaagacuguguggauacA     | 1  | 1 | S03 |
| ugaagacuguguggauacgauugU   | ugaagacuguguggauacgauugU  | 1  | 1 | S03 |
| ugaagacuguguggaUCgauugc    | ugaagacuguguggaUCgauugc   | 2  | 1 | S03 |
| gaagacuguguggauacgauugcu   | gaagacuguguggauacgauugcu  | 2  | 0 | S03 |
| agacuguguggauacgauugc      | agacuguguggauacgauugc     | 1  | 0 | S03 |
| agacuguguggaUCgauugcu      | agacuguguggaUCgauugcu     | 2  | 0 | S03 |
| agacuguguggaUCgauugcu      | agacuguguggaUCgauugcu     | 1  | 1 | S03 |
| agacuguguggaAcgauugcug     | agacuguguggaAcgauugcug    | 1  | 1 | S03 |
| gacuguguggaUCgauugcuga     | gacuguguggaUCgauugcuga    | 1  | 0 | S03 |
| auggucauucagcuuuaucaucug   | auggucauucagcuuuaucaucug  | 1  | 0 | S04 |
| uggucauuGagcuuuaucaucug    | uggucauuGagcuuuaucaucug   | 1  | 1 | S04 |
| uggucauucagcuuuaucaucugU   | uggucauucagcuuuaucaucugU  | 1  | 1 | S04 |
| uacaagauugaugggcauu        | uacaagauugaugggcauu       | 1  | 0 | S04 |
| uacaagauugaugggcauuaaaac   | uacaagauugaugggcauuaaaac  | 6  | 0 | S04 |
| acaagauugaugggcauuaaaac    | acaagauugaugggcauuaaaac   | 6  | 0 | S04 |
| acaagauugaugggGUuaaaaac    | acaagauugaugggGUuaaaaac   | 1  | 1 | S04 |
| acaagauugaugggcauuaaGaca   | acaagauugaugggcauuaaGaca  | 1  | 1 | S04 |
| acaagauugaugggcauuaaaacU   | acaagauugaugggcauuaaaacU  | 1  | 1 | S04 |
| acaagauugaugggcauuaaaaca   | acaagauugaugggcauuaaaaca  | 7  | 0 | S04 |
| caagauugaugggcauuaaaac     | caagauugaugggcauuaaaac    | 4  | 0 | S04 |
| caagauugaugggcauuaaaaca    | caagauugaugggcauuaaaaca   | 4  | 0 | S04 |
| caagauugaugggcauuaaGaca    | caagauugaugggcauuaaGaca   | 1  | 1 | S04 |
| caagauugaugggcauuaaaacaC   | caagauugaugggcauuaaaacaC  | 1  | 1 | S04 |
| caagauugaugggcauuaaaacag   | caagauugaugggcauuaaaacag  | 3  | 0 | S04 |
| aagauugaugggcauuaaaac      | aagauugaugggcauuaaaac     | 1  | 0 | S04 |
| aagauugaugggcauuaaaaca     | aagauugaugggcauuaaaaca    | 3  | 0 | S04 |
| aagauugaugggcauuaaaacaga   | aagauugaugggcauuaaaacaga  | 14 | 0 | S04 |
| aagauugaugggcauuaaaacagU   | aagauugaugggcauuaaaacagU  | 1  | 1 | S04 |
| Nagauugaugggcauuaaaacaga   | Nagauugaugggcauuaaaacaga  | 1  | 1 | S04 |
| agauugaugggcauuaaaaca      | agauugaugggcauuaaaaca     | 2  | 0 | S04 |
| gauugaugggcauuaaaac        | gauugaugggcauuaaaac       | 1  | 0 | S04 |
| gauugaugggcauuaaaaca       | gauugaugggcauuaaaaca      | 3  | 0 | S04 |
| gauugaugggcauuaaaacaga     | gauugaugggcauuaaaacaga    | 2  | 0 | S04 |
| gauugaugggcauuaaaacagau    | gauugaugggcauuaaaacagau   | 1  | 0 | S04 |
| gauugaugggcauuaaaacagauC   | gauugaugggcauuaaaacagauC  | 1  | 1 | S04 |
| gauugaugggcauuaaaacagauu   | gauugaugggcauuaaaacagauu  | 4  | 0 | S04 |
| gauugaugggcauuaaaacagGuu   | gauugaugggcauuaaaacagGuu  | 1  | 1 | S04 |
| auugaugggcauuaaaac         | auugaugggcauuaaaac        | 1  | 0 | S04 |
| auugaugggcauuaaaacagauG    | auugaugggcauuaaaacagauG   | 1  | 1 | S04 |
| auugaugggcauuaaaacagauu    | auugaugggcauuaaaacagauu   | 4  | 0 | S04 |
| auugaugggGUuaaaaacagauu    | auugaugggGUuaaaaacagauu   | 1  | 1 | S04 |
| uugaugggcauuaaaacagau      | uugaugggcauuaaaacagau     | 1  | 0 | S04 |
| uugaugggcauuaaaacagauu     | uugaugggcauuaaaacagauu    | 7  | 0 | S04 |
| uugaugggcauuaaaacagauuau   | uugaugggcauuaaaacagauuau  | 1  | 0 | S04 |
| ugaugggcauuaaaacag         | ugaugggcauuaaaacag        | 1  | 0 | S04 |
| ugaugggcauuaaaacagauC      | ugaugggcauuaaaacagauC     | 1  | 1 | S04 |
| ugaugggcauuaaaacagauu      | ugaugggcauuaaaacagauu     | 3  | 0 | S04 |



Star

Mature

agauggucauucagcuuuaucaucugguacaagauugaugggcauuaaaacagaauuaauuuggcugaagacugugggauacgauugcugauuuuguaaaagauauucu

|                                       |     |   |     |
|---------------------------------------|-----|---|-----|
| .....auuaauuuggcugaagacugu.....       | 14  | 0 | S04 |
| .....auuaauuuggcugaagacugA.....       | 1   | 1 | S04 |
| .....auuaaGuuuggcugaagacugug.....     | 1   | 1 | S04 |
| .....auuaauuuggcugaagacAgug.....      | 2   | 1 | S04 |
| .....auuaauuuggcugaagacugug.....      | 1   | 1 | S04 |
| .....auuaauuuggcugaagacugug.....      | 1   | 1 | S04 |
| .....auuaauuuggcugaagacugug.....      | 1   | 1 | S04 |
| .....aCuuaauuuggcugaagacugug.....     | 1   | 1 | S04 |
| .....auuaauuuggcugaagacugug.....      | 1   | 1 | S04 |
| .....auuaauuuggcugGagacugug.....      | 1   | 1 | S04 |
| .....auuaaCuuggcugaagacugug.....      | 1   | 1 | S04 |
| .....auuaauuuggcugaagacugug.....      | 141 | 0 | S04 |
| .....auuaauuuggcugaagacugugu.....     | 6   | 0 | S04 |
| .....auuaauuuggcugaagacugugC.....     | 2   | 1 | S04 |
| .....uuuaauuuggcugaagacA.....         | 2   | 1 | S04 |
| .....uuuaauuuggcugaagacu.....         | 9   | 0 | S04 |
| .....Nuuaauuuggcugaagacu.....         | 1   | 1 | S04 |
| .....uuuaauuuggcugaagacug.....        | 46  | 0 | S04 |
| .....Cuuaauuuggcugaagacug.....        | 1   | 1 | S04 |
| .....Nuuaauuuggcugaagacug.....        | 1   | 1 | S04 |
| .....Nuuaauuuggcugaagacugu.....       | 2   | 1 | S04 |
| .....uuuaauuuggcugaagacugG.....       | 7   | 1 | S04 |
| .....uuuaauuuggcugaagacugu.....       | 53  | 0 | S04 |
| .....uuuaauuuggcugaagacugA.....       | 2   | 1 | S04 |
| .....uuuaauuuggcugaGgacugu.....       | 1   | 1 | S04 |
| .....uuGuaauuuggcugaagacugu.....      | 1   | 1 | S04 |
| .....uuuaauuuggcugaagacugAg.....      | 1   | 1 | S04 |
| .....uuuaauuuggcugaagacugug.....      | 30  | 0 | S04 |
| .....Nuuaauuuggcugaagacugug.....      | 1   | 1 | S04 |
| .....uuuaauuuggcugaagacugugA.....     | 17  | 1 | S04 |
| .....Nuuaauuuggcugaagacugugu.....     | 1   | 1 | S04 |
| .....uuuaauuuggcugaagacugugC.....     | 59  | 1 | S04 |
| .....Cuuaauuuggcugaagacugugu.....     | 2   | 1 | S04 |
| .....uuuaauuuggcugaagacugugu.....     | 1   | 1 | S04 |
| .....uuuaaAuuggcugaagacugugu.....     | 1   | 1 | S04 |
| .....uuuaauuuggcugaagacugugu.....     | 449 | 0 | S04 |
| .....uuauGauuuggcugaagacugugu.....    | 2   | 1 | S04 |
| .....Guuaauuuggcugaagacugugu.....     | 5   | 1 | S04 |
| .....uuuaauuuggcugaagacugugu.....     | 2   | 1 | S04 |
| .....uuuaauuuggcugaGgacugugu.....     | 1   | 1 | S04 |
| .....uuuaaGuuuggcugaagacugugu.....    | 1   | 1 | S04 |
| .....uuuaaCuuggcugaagacugugu.....     | 1   | 1 | S04 |
| .....uuuaauuuggcugaagacAgugu.....     | 1   | 1 | S04 |
| .....uuGuaauuuggcugaagacugugu.....    | 2   | 1 | S04 |
| .....uuuaauuuggcugUgacugugu.....      | 1   | 1 | S04 |
| .....uuUuaauuuggcugaagacugugu.....    | 1   | 1 | S04 |
| .....uuuaauuuggcugaagacugugG.....     | 40  | 1 | S04 |
| .....uuuaauuuggcugGagacugugu.....     | 4   | 1 | S04 |
| .....uuuaauuuggcugaagacugugu.....     | 1   | 1 | S04 |
| .....uuuaauuuggcugaagacugugu.....     | 2   | 1 | S04 |
| .....uuuaauuuggcugaagacugugug.....    | 1   | 0 | S04 |
| .....uuuaauuuggAcugaagacugugguaa..... | 1   | 1 | S04 |
| .....uuuaauuuggcugaagacA.....         | 1   | 1 | S04 |
| .....uuuaauuuggcugaagacu.....         | 2   | 0 | S04 |
| .....uuuaauuuggcugaagacug.....        | 8   | 0 | S04 |
| .....uCuuaauuuggcugaagacug.....       | 1   | 1 | S04 |
| .....uuuaauuuggcugaagacugG.....       | 1   | 1 | S04 |
| .....uuuaGuuuggcugaagacugu.....       | 1   | 1 | S04 |
| .....uuuaauuuggcugaagacugu.....       | 4   | 0 | S04 |
| .....uuuaauuuggcugGagacugu.....       | 1   | 1 | S04 |
| .....uuuaauuuggcugaagacugug.....      | 1   | 1 | S04 |
| .....uuuaauuuggcugaagacugug.....      | 28  | 0 | S04 |
| .....uuuaauuuggcugaagacugugC.....     | 2   | 1 | S04 |
| .....uuuaauuuggcugaagacugugG.....     | 3   | 1 | S04 |
| .....uuuaauuuggcugaagacugugu.....     | 38  | 0 | S04 |
| .....uuuaauuuggcugGagacugugu.....     | 1   | 1 | S04 |
| .....uuuaauuuggcAgaagacugugu.....     | 1   | 1 | S04 |
| .....uuuaauuuggcugaagacugugC.....     | 2   | 1 | S04 |
| .....uuuaauuuggcugaagacugugCg.....    | 1   | 1 | S04 |
| .....uuuaauuuggcugaagacugugug.....    | 2   | 1 | S04 |

Star

Mature

agauggucauucagcuuuaucaucugguacaagauugaugggcauuaaaacagaauuaauuugggcugaagacuguguggauacgauugcugauuuuguaaaagauauucu

|                                       |     |   |     |
|---------------------------------------|-----|---|-----|
| .....uauuuuugggcugaagacugugug.....    | 83  | 0 | S04 |
| .....uauuuuugggcugaGgacugugug.....    | 1   | 1 | S04 |
| .....Nauuuuugggcugaagacugugug.....    | 1   | 1 | S04 |
| .....uauuuuugggcugaagacugugAG.....    | 1   | 1 | S04 |
| .....uGuuuuugggcugaagacugugug.....    | 1   | 1 | S04 |
| .....Guuuuugggcugaagacu.....          | 1   | 1 | S04 |
| .....auuuuugggcugaagacu.....          | 8   | 0 | S04 |
| .....auuuuugggcugaagacA.....          | 1   | 1 | S04 |
| .....auuuuugggcugaagacug.....         | 16  | 0 | S04 |
| .....auuuuugggcugaagacuC.....         | 1   | 1 | S04 |
| .....auuuuugggcugaagacugG.....        | 1   | 1 | S04 |
| .....Guuuuugggcugaagacugug.....       | 1   | 1 | S04 |
| .....auuuuugggcugaagacugug.....       | 18  | 0 | S04 |
| .....auuuuCGgcugaagacugug.....        | 1   | 1 | S04 |
| .....auuuuugggcugaagacugGg.....       | 1   | 1 | S04 |
| .....auuuuugggcugaagacugug.....       | 48  | 0 | S04 |
| .....auuuuugggcugaagacugugug.....     | 222 | 0 | S04 |
| .....auuuuugggcugaGgacugugug.....     | 1   | 1 | S04 |
| .....auuuuAGgcugaagacugugug.....      | 1   | 1 | S04 |
| .....auuuuugggcugaagacugugC.....      | 22  | 1 | S04 |
| .....Guuuuugggcugaagacugugug.....     | 4   | 1 | S04 |
| .....auuuuuCGcugaagacugugug.....      | 2   | 1 | S04 |
| .....auuuuugggcugGagacugugug.....     | 1   | 1 | S04 |
| .....auuuuugggcugaagacugugA.....      | 11  | 1 | S04 |
| .....Nuuuuugggcugaagacugugug.....     | 2   | 1 | S04 |
| .....aCaauuugggcugaagacugugug.....    | 1   | 1 | S04 |
| .....auuuuugggcugaagacugugG.....      | 11  | 1 | S04 |
| .....auGuuuugggcugaagacugugug.....    | 2   | 1 | S04 |
| .....auuuuuCGcugaagacugugug.....      | 1   | 1 | S04 |
| .....Guuuuugggcugaagacugugug.....     | 1   | 1 | S04 |
| .....auuuuugggcugaagacugugug.....     | 48  | 0 | S04 |
| .....auuuuCGgcugaagacugugugg.....     | 1   | 1 | S04 |
| .....Uuuuuugggcugaagacugugugg.....    | 1   | 1 | S04 |
| .....auuuuGggcugaagacugugugg.....     | 2   | 1 | S04 |
| .....auuuuAGgcugaagacugugugg.....     | 1   | 1 | S04 |
| .....auuuuugggcugaagacugugugg.....    | 88  | 0 | S04 |
| .....auuuuugggcugGagacugugugg.....    | 2   | 1 | S04 |
| .....auaGuuuugggcugaagacugugugg.....  | 1   | 1 | S04 |
| .....auuuuugggcugCagacugugugg.....    | 1   | 1 | S04 |
| .....auuuuugggcugaagacugugugga.....   | 2   | 0 | S04 |
| .....auaGuuuugggcugaagacugugugga..... | 1   | 1 | S04 |
| .....auuuuugggcugaagacuguguggaC.....  | 1   | 1 | S04 |
| .....uuuuuugggcugaagacug.....         | 1   | 0 | S04 |
| .....uuuuuugggcugaagacugug.....       | 6   | 0 | S04 |
| .....uuuuuugggcugaagacugugug.....     | 17  | 0 | S04 |
| .....uuuuuugggcugaagacugugA.....      | 1   | 1 | S04 |
| .....uuuuuCGgcugaagacugugug.....      | 1   | 1 | S04 |
| .....uuuuuugggcugaagacugugug.....     | 13  | 0 | S04 |
| .....uuuuuugggcugaagacugugugg.....    | 1   | 0 | S04 |
| .....uuuuuugggcugaagacugugugC.....    | 1   | 1 | S04 |
| .....uuuuuugggcugaagacugugugga.....   | 5   | 0 | S04 |
| .....uuuuuugggcugaagacugugCgga.....   | 1   | 1 | S04 |
| .....auuuugggcugaagacugug.....        | 3   | 0 | S04 |
| .....auuuugggcugaagacugug.....        | 1   | 0 | S04 |
| .....auuuugggcugaagacugugG.....       | 1   | 1 | S04 |
| .....auuuugggcugaagacugugA.....       | 1   | 1 | S04 |
| .....auuuugggcugaagacugugC.....       | 3   | 1 | S04 |
| .....Guuuugggcugaagacugugug.....      | 1   | 1 | S04 |
| .....auuuugggcugaagacugugug.....      | 13  | 0 | S04 |
| .....auuuugggcugaagacugugugC.....     | 1   | 1 | S04 |
| .....auuuugggcugaagacugugug.....      | 20  | 0 | S04 |
| .....auuuugggcugaagacugugugg.....     | 8   | 0 | S04 |
| .....auuuugggcugaagacugugugga.....    | 5   | 0 | S04 |
| .....auuuugggcugaagacuguguggau.....   | 34  | 0 | S04 |
| .....auuuugggcugaagacuguguggaC.....   | 3   | 1 | S04 |
| .....auuuugggcugaagacuguguggau.....   | 1   | 1 | S04 |
| .....auuuuCGcugaagacuguguggau.....    | 1   | 1 | S04 |
| .....auuuuugggcugaagacuguguggaG.....  | 1   | 1 | S04 |
| .....auuuuugggcugaagacugugCgga.....   | 2   | 1 | S04 |
| .....auuuuugggcugaagacuguguggau.....  | 1   | 0 | S04 |

Star

Mature

agauggucauucagcguuuaucaucugguacaagauugaugggcauuaaaacagauuauaaauuggcugaagacuguguggauacgauugcugauuuuguaaaagauauucu

|                                         |    |   |     |
|-----------------------------------------|----|---|-----|
| ..... auuggcugaagacugug.....            | 2  | 0 | S04 |
| ..... auuggcugaagacugugG.....           | 1  | 1 | S04 |
| ..... auuggcugaagacugugC.....           | 1  | 1 | S04 |
| ..... auuggcugaagacugugugu.....         | 15 | 0 | S04 |
| ..... aCuuggcugaagacugugugu.....        | 1  | 1 | S04 |
| ..... auCuuggcugaagacugugug.....        | 1  | 1 | S04 |
| ..... auuuggcugaagacugugug.....         | 6  | 0 | S04 |
| ..... auuuggcugaagacugugugC.....        | 1  | 1 | S04 |
| ..... auuuggcugaagacugugugg.....        | 12 | 0 | S04 |
| ..... auuuggcugaagacugugugga.....       | 6  | 0 | S04 |
| ..... auuuggcugaagacuguguggau.....      | 8  | 0 | S04 |
| ..... auuuggcugaagacuguguggaC.....      | 3  | 1 | S04 |
| ..... auuuggcugaagacugGuggaua.....      | 1  | 1 | S04 |
| ..... auuuggcugaagacuguguggaua.....     | 13 | 0 | S04 |
| ..... auuuggcugaagacuguguggaCa.....     | 2  | 1 | S04 |
| ..... auuCggcugaagacuguguggaua.....     | 2  | 1 | S04 |
| ..... auuuAgcugaagacuguguggaua.....     | 3  | 1 | S04 |
| ..... auuuggcugaagCuguguggaua.....      | 1  | 1 | S04 |
| ..... uuuggcugaagacugugugu.....         | 4  | 0 | S04 |
| ..... uuuggcugaagacugugugG.....         | 2  | 1 | S04 |
| ..... uuuggcugaagacugugug.....          | 5  | 0 | S04 |
| ..... uuuggcugaagacugugugC.....         | 1  | 1 | S04 |
| ..... uuuggcugaagacugugugg.....         | 2  | 0 | S04 |
| ..... uuuggcugaagacugugugga.....        | 1  | 0 | S04 |
| ..... uuuggcugGagacugugugga.....        | 1  | 1 | S04 |
| ..... uuugCcugaagacugugugga.....        | 1  | 1 | S04 |
| ..... uuuggcugaGgacuguguggau.....       | 1  | 1 | S04 |
| ..... uuuggcugaagacuguguggaC.....       | 1  | 1 | S04 |
| ..... uuuggcugaagacuguguggau.....       | 15 | 0 | S04 |
| ..... uuuggcugaagacuguguggua.....       | 2  | 1 | S04 |
| ..... uuugAcugaagacuguguggaua.....      | 1  | 1 | S04 |
| ..... uuuggcugaagacuguguggauC.....      | 2  | 1 | S04 |
| ..... uuuggcugaagacugugugCgaua.....     | 1  | 1 | S04 |
| ..... uuuggcugaagacuguguggaua.....      | 35 | 0 | S04 |
| ..... uuuggcugaaAacuguguggaua.....      | 1  | 1 | S04 |
| ..... uuuggcugaagacuguguggauaG.....     | 1  | 1 | S04 |
| ..... uuuggcugaagacuguguggauaU.....     | 1  | 1 | S04 |
| ..... uuuggcugaagacuguguggauac.....     | 4  | 0 | S04 |
| ..... uuggcugaagacugugugG.....          | 1  | 1 | S04 |
| ..... uuggcugaagacugugugg.....          | 1  | 0 | S04 |
| ..... uuggcugaagacuguguggau.....        | 3  | 0 | S04 |
| ..... uuggcugaagacuguguggauC.....       | 1  | 1 | S04 |
| ..... uuggcugaagacuguguggaua.....       | 12 | 0 | S04 |
| ..... uggcugaagacugugugg.....           | 3  | 0 | S04 |
| ..... uggcugaagacugugugga.....          | 3  | 0 | S04 |
| ..... uggcugaagacuguguggC.....          | 1  | 1 | S04 |
| ..... uggcugaagacuguguggau.....         | 5  | 0 | S04 |
| ..... uggcugaagacuguguggaua.....        | 2  | 0 | S04 |
| ..... ggcugaagacugugugga.....           | 2  | 0 | S04 |
| ..... ggcugaagacuguguggau.....          | 2  | 0 | S04 |
| ..... ggcugaagacuguguggCu.....          | 1  | 1 | S04 |
| ..... ggcugaagacuguguggaG.....          | 1  | 1 | S04 |
| ..... ggcugaagacuguguggaua.....         | 1  | 0 | S04 |
| ..... ggcugaagacuguguggauC.....         | 1  | 1 | S04 |
| ..... ggcugaagacuguguggauac.....        | 1  | 0 | S04 |
| ..... ggcugaagacuguguggauacgauugcu..... | 1  | 0 | S04 |
| ..... Ucuagaagacuguguggau.....          | 1  | 1 | S04 |
| ..... gcugaagacuguguggauC.....          | 3  | 1 | S04 |
| ..... gcugaagacuguguggaua.....          | 1  | 0 | S04 |
| ..... ugaagacuguguggauac.....           | 1  | 0 | S04 |
| ..... ugaagacuguguggauacgauugcuU.....   | 1  | 1 | S04 |
| ..... gaagacuguguggauacgauugA.....      | 1  | 1 | S04 |
| ..... gaagacuguguggauacgauugcu.....     | 2  | 0 | S04 |
| ..... aagacuguguggauacgauugU.....       | 1  | 1 | S04 |
| ..... agacuguguggauacgauugC.....        | 1  | 0 | S04 |
| ..... agacuguguggauacgauugCA.....       | 2  | 1 | S04 |
| ..... agacuguguggauacgauugcu.....       | 2  | 0 | S04 |
| ..... agacuguguggauacgauugCG.....       | 2  | 1 | S04 |
| ..... agacuguguggaAacgauugcug.....      | 1  | 1 | S04 |
| ..... agacuguguggaAacgauugcuga.....     | 1  | 1 | S04 |

## Star

## Mature

|                                                                                                                               |   |   |     |
|-------------------------------------------------------------------------------------------------------------------------------|---|---|-----|
| agauggcauucagcuuuaucaucug <u>guaca</u> agauugaugggcauuaaaa <u>caga</u> uuauuuuggcugaagacuguguggauacgauugcugauuuuguaaaagauuucu |   |   |     |
| .....agacugugggauacgauugcuga.....                                                                                             | 1 | 0 | S04 |
| .....gacugugggauacgauugcA.....                                                                                                | 1 | 1 | S04 |
| .....ugggauacgauugcugauuuu.....                                                                                               | 1 | 0 | S04 |
| .....cgauugcugauuuuguaaa.....                                                                                                 | 1 | 0 | S04 |
| .....cgauugcugauuuuguaaaaga.....                                                                                              | 1 | 0 | S04 |



Provisional ID : chrCnn\_random\_3450287  
 Score total : 20.6  
 Score for star read(s) : 3.9  
 Score for read counts : 14.9  
 Score for mfe : 1.8  
 Score for randfold : 0  
 Score for cons. seed :  
 Total read count : 41  
 Mature read count : 39  
 Loop read count : 0  
 Star read count : 2

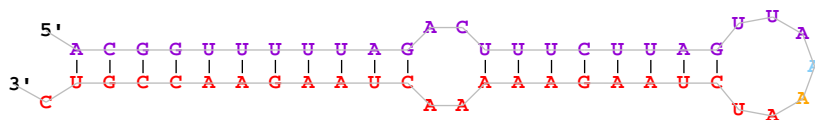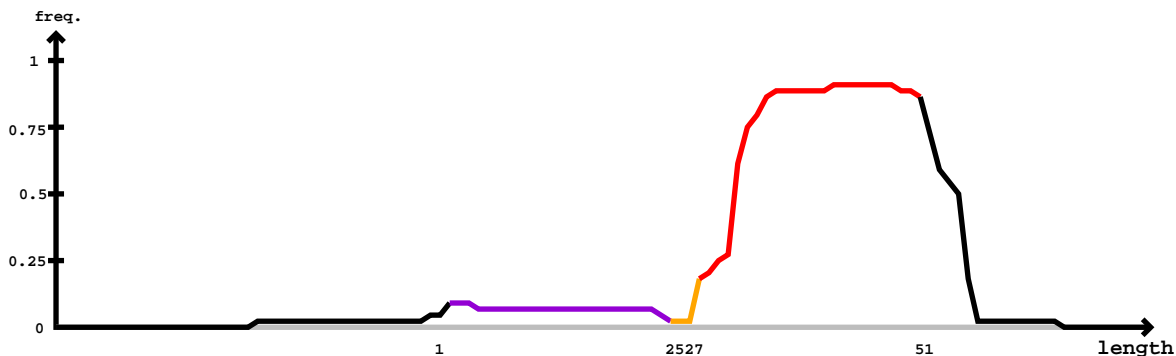

Star
Mature

| 5' -                                                                |                          | -3'                       | obs                     | mm | sample |
|---------------------------------------------------------------------|--------------------------|---------------------------|-------------------------|----|--------|
|                                                                     |                          |                           | exp                     |    |        |
| ugacauuuuuuaacauuuuucggccucguguuuaagagac                            | cgguuuuuuagacuuucuuaguua | aaucuaagaaaaacuaagaaccguc | ucuuauucgaagcuaaaaacccc |    |        |
| ugacauuuuuuaacauuuuucggccucguguuuaagagac                            | cgguuuuuuagacuuucuuaguua | aaucuaagaaaaacuaagaaccguc | ucuuauucgaagcuaaaaacccc |    |        |
| .....(((((((.....((((((((((((((((((((.....))))))))))))))))))))..... |                          |                           |                         |    |        |
| .....aAacgguuuuuagacuuucuuagu.....                                  |                          |                           | reads                   | mm | sample |
| .....aaucuaagaaaaacuaagaaccUu.....                                  |                          |                           | 1                       | 1  | S03    |
| .....aucuaagaaaaacuaagaaccguc.....                                  |                          |                           | 1                       | 1  | S03    |
| .....ucuaagaaaaacuaagaaccgucC.....                                  |                          |                           | 3                       | 0  | S03    |
| .....cuaagaaaaacuaagaaccgucuc.....                                  |                          |                           | 1                       | 1  | S03    |
| .....uaagaaaaacuaagaaccguc.....                                     |                          |                           | 1                       | 0  | S03    |
| .....aagGaaaaacuaagaaccgucucu.....                                  |                          |                           | 1                       | 0  | S03    |
| .....aagaaaaacuaagaaccgucucu.....                                   |                          |                           | 1                       | 1  | S03    |
| .....aagaaaaacuaagaaccgucucuC.....                                  |                          |                           | 2                       | 0  | S03    |
| .....gaaaaacuaagaaccgucucuU.....                                    |                          |                           | 1                       | 1  | S03    |
| .....aaaaacuaagaaccgucucuC.....                                     |                          |                           | 1                       | 1  | S03    |
| .....aagaaccguUucuuauucgaagcu.....                                  |                          |                           | 1                       | 1  | S03    |
| .....uucggccucguguuuaagagacA.....                                   |                          |                           |                         |    |        |
| .....acgguuuuuagacuuucuuagCu.....                                   |                          |                           | 1                       | 1  | S04    |
| .....acgguuuuuagacuuucuuaguua.....                                  |                          |                           | 1                       | 0  | S04    |
| .....aucuaagaaaaacuaagaacc.....                                     |                          |                           | 1                       | 0  | S04    |
| .....aucuaagaaaaacuaagaaccguc.....                                  |                          |                           | 1                       | 0  | S04    |
| .....cuaagaaaaacuaagaaccgucuc.....                                  |                          |                           | 3                       | 0  | S04    |
| .....aagaaaaacuaagaaccgucG.....                                     |                          |                           | 1                       | 1  | S04    |
| .....aagaaaaacuaagaaccgucuc.....                                    |                          |                           | 1                       | 0  | S04    |
| .....aagaaaaacuaagaaccgucC.....                                     |                          |                           | 1                       | 1  | S04    |
| .....aagaaaaacuaagaaccgucucu.....                                   |                          |                           | 1                       | 0  | S04    |
| .....aagaaaaacuaagaaccgucucA.....                                   |                          |                           | 1                       | 1  | S04    |
| .....aagaaaaacuaagaaccguGucu.....                                   |                          |                           | 1                       | 1  | S04    |
| .....aagaaaaacuaagaaccgucucu.....                                   |                          |                           | 1                       | 0  | S04    |
| .....aagGaaaaacuaagaaccgucucu.....                                  |                          |                           | 3                       | 0  | S04    |
| .....aagaaaaacuaagaaccgucucu.....                                   |                          |                           | 1                       | 1  | S04    |
| .....aagaaaaacuaagaaccgucucuU.....                                  |                          |                           | 1                       | 1  | S04    |
| .....agaaaaacuaagaaccgucucu.....                                    |                          |                           | 1                       | 0  | S04    |
| .....agaaaaacuaagaaccgucucuA.....                                   |                          |                           | 1                       | 1  | S04    |
| .....agaaaaacuaagaaccgucucu.....                                    |                          |                           | 1                       | 1  | S04    |
| .....agaaaaacuaagaaccgucucu.....                                    |                          |                           | 1                       | 0  | S04    |
| .....agaaaaacuaagaaccgucucuCa.....                                  |                          |                           | 1                       | 1  | S04    |
| .....agaaaaacuaagaaccgucucuUG.....                                  |                          |                           | 1                       | 1  | S04    |
| .....agaaaaacuaagaaccgucucuUG.....                                  |                          |                           | 2                       | 1  | S04    |

Star

Mature

ugacauuuuuuaacauuuuuucggccucguguuuaagagacgguuuuuagacuuucuuaguuuaaauucuaagaaaaacuaagaaccgucucuuaucgaagcuaaaacccc  
.....gaaaaacuaagaaccgucucuCa..... 1 1 S04  
.....aaaaacuaagaaccgucu..... 1 0 S04  
.....aaaaacuaagaaccgucucu..... 2 0 S04

Provisional ID : chrCnn\_random\_3453549  
 Score total : 0.1  
 Score for star read(s) : -1.3  
 Score for read counts : 0  
 Score for mfe : 1.4  
 Score for randfold : 0  
 Score for cons. seed :  
 Total read count : 30  
 Mature read count : 30  
 Loop read count : 0  
 Star read count : 0

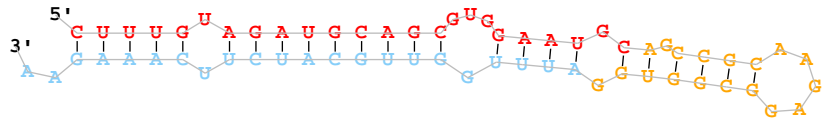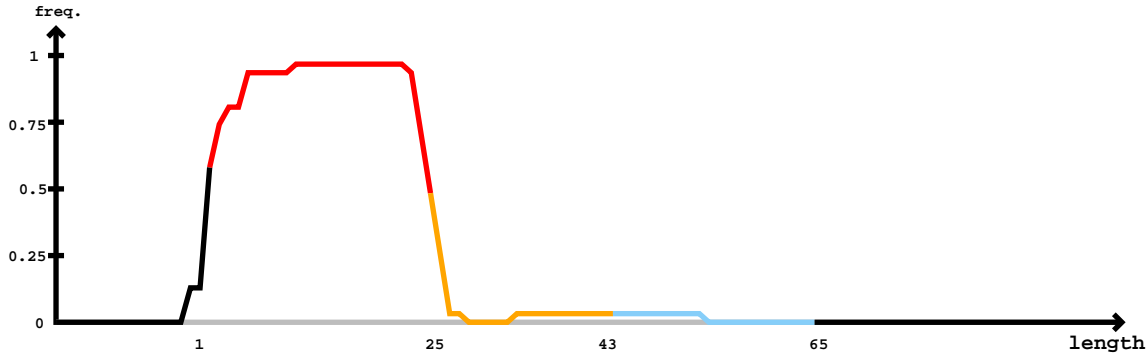

**Mature**

**Star**

| 5' -                                                                                                         | reads | mm | sample |
|--------------------------------------------------------------------------------------------------------------|-------|----|--------|
| agaggaagucauugcuuuuguagaugcagcguggaaugcagccgcaagaggcgguggauuugguugcaucucaaagaaauaacaacaaagcuuugucaaacgucucaa | 1     | 1  | S03    |
| .....gagggcgguggauuugguGgc.....                                                                              | 1     | 1  | S03    |
| .....ugcuuuAuagaugcagcguggaa.....                                                                            | 4     | 1  | S04    |
| .....cuuuAuagaugcagcguggaa.....                                                                              | 1     | 1  | S04    |
| .....cuuuAuagaugcagcguggaa.....                                                                              | 1     | 1  | S04    |
| .....cuuuAuagaugcagcguggaaug.....                                                                            | 2     | 1  | S04    |
| .....cuuuAuagaugcagcguggaaugc.....                                                                           | 10    | 1  | S04    |
| .....uuuAuagaugcagcguggaa.....                                                                               | 1     | 1  | S04    |
| .....uuuAuagaugcagcguggaaug.....                                                                             | 3     | 1  | S04    |
| .....uuuAuagaugcagcguggaaugc.....                                                                            | 1     | 1  | S04    |
| .....uuAuagaugcagcguggaaug.....                                                                              | 2     | 1  | S04    |
| .....Auagaugcagcguggaa.....                                                                                  | 1     | 1  | S04    |
| .....Auagaugcagcguggaaugc.....                                                                               | 2     | 1  | S04    |
| .....Auagaugcagcguggaaugca.....                                                                              | 1     | 1  | S04    |
| .....ugcagcguggaaugcUgc.....                                                                                 | 1     | 1  | S04    |

Provisional ID : chrCnn\_random\_3457252  
 Score total : 0.1  
 Score for star read(s) : -1.3  
 Score for read counts : 0  
 Score for mfe : 1.4  
 Score for randfold : 0  
 Score for cons. seed :  
 Total read count : 470  
 Mature read count : 469  
 Loop read count : 1  
 Star read count : 0

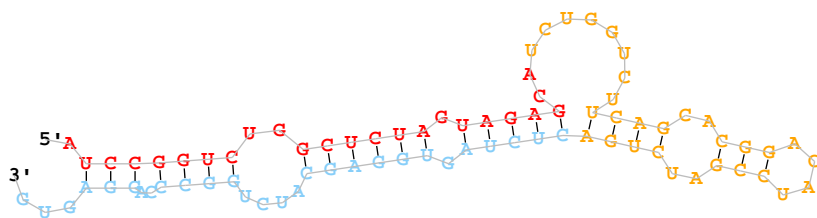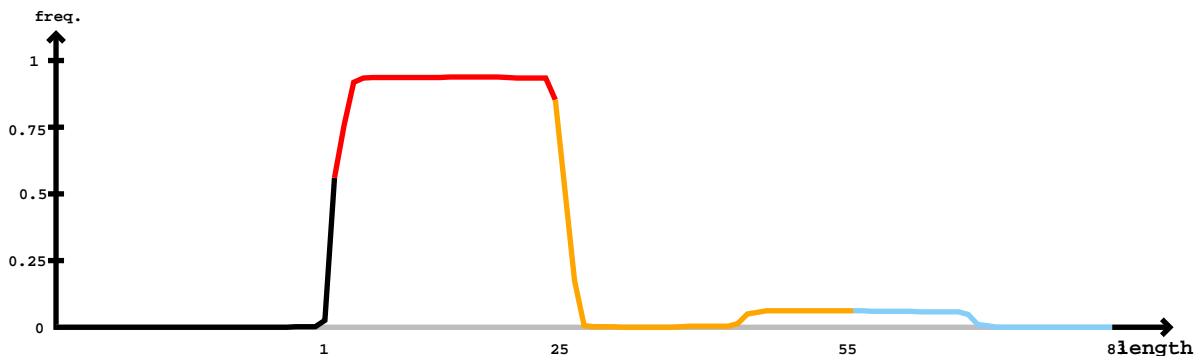

**Mature**

**Star**

| 5' -                                                                                                                                  | reads | mm | sample |
|---------------------------------------------------------------------------------------------------------------------------------------|-------|----|--------|
| guugagcaucuggccuccagcacaac <u>auccggucuggcucucuaguagagca</u> aucuggucucagcacggacaucggaucuga <u>cucuaguggagcaucuggcccaggagug</u> caucu | 1     | 1  | S03    |
| .....cauccggucuggcucuaguagagc.....                                                                                                    | 1     | 0  | S03    |
| .....cauccggucuggcucucuaguagagc.....                                                                                                  | 1     | 1  | S03    |
| .....auccggucuggcucucuaguagagU.....                                                                                                   | 4     | 0  | S03    |
| .....auccggucuggcucucuaguagagG.....                                                                                                   | 1     | 1  | S03    |
| .....auccggucuggcucucuaguagaC.....                                                                                                    | 1     | 1  | S03    |
| .....auccggucuggcA <u>cu</u> aguagagca.....                                                                                           | 1     | 1  | S03    |
| .....auccggucuc <u>Cg</u> cucuaguagagca.....                                                                                          | 1     | 1  | S03    |
| .....auccggucuggcucucuaguagagcG.....                                                                                                  | 7     | 1  | S03    |
| .....auccggucuggcucucuagGagagca.....                                                                                                  | 1     | 1  | S03    |
| .....auccggucuggcucucuaguagagca.....                                                                                                  | 55    | 0  | S03    |
| .....Guccggucuggcucucuaguagagca.....                                                                                                  | 1     | 1  | S03    |
| .....uccggucuggcucucuaguagagca.....                                                                                                   | 4     | 0  | S03    |
| .....uccggucuggcucucuaguagagcU.....                                                                                                   | 1     | 1  | S03    |
| .....uccggucuggcucucuaguagagcaG.....                                                                                                  | 3     | 1  | S03    |
| .....uccggucuggcucucuaguagagcau.....                                                                                                  | 21    | 0  | S03    |
| .....uccggucuggcucucuaguUgagcau.....                                                                                                  | 1     | 1  | S03    |
| .....uccggucuggcucucuaguagagcaC.....                                                                                                  | 2     | 1  | S03    |
| .....ccggucuggcucucuaguagagca.....                                                                                                    | 2     | 0  | S03    |
| .....ccggucuggcucucuaguagagcauc.....                                                                                                  | 21    | 0  | S03    |
| .....ccggC <u>c</u> uggcucucuaguagagcauc.....                                                                                         | 1     | 1  | S03    |
| .....ccggucuggcucucuaguagagcGuc.....                                                                                                  | 1     | 1  | S03    |
| .....ccggucuggcucA <u>g</u> uagagcauc.....                                                                                            | 2     | 1  | S03    |
| .....ccggucuggcucucuaguagagcauA.....                                                                                                  | 2     | 1  | S03    |
| .....ccggucuggcuA <u>u</u> aguagagcauc.....                                                                                           | 1     | 1  | S03    |
| .....cggucuggcucucuaguagagca.....                                                                                                     | 1     | 0  | S03    |
| .....cggucuggcucucuaguagagcauc.....                                                                                                   | 1     | 0  | S03    |
| .....auccgaucugacucuaguggagca.....                                                                                                    | 3     | 0  | S03    |
| .....auccgaucugacucuaguggagcU.....                                                                                                    | 1     | 1  | S03    |
| .....uccgaucugacucuaguggagca.....                                                                                                     | 1     | 0  | S03    |
| .....aGacauccggucuggcucucuagu.....                                                                                                    | 1     | 1  | S04    |
| .....cauccggucuggcucucuaguagagU.....                                                                                                  | 2     | 1  | S04    |
| .....cauccggucugA <u>c</u> ucuaguagagc.....                                                                                           | 1     | 1  | S04    |

Mature

Star

| Sequence                                                                                                                             | Count | Count | Category |
|--------------------------------------------------------------------------------------------------------------------------------------|-------|-------|----------|
| guugagcaucuggccuccagcacaaac <u>auccggucuggcucuaguagagca</u> ucuggucuucagcacggaca <u>uccgaucuga</u> cucuaguggagcaucuggcccaggagugcaucu |       |       |          |
| .....cauccggucuggcucuaguagagc.....                                                                                                   | 5     | 0     | S04      |
| .....cauccggucuggcucuaguagagcau.....                                                                                                 | 2     | 0     | S04      |
| .....auccggucuggcucuaguC.....                                                                                                        | 1     | 1     | S04      |
| .....auccggucuggcucuaguagagc.....                                                                                                    | 13    | 0     | S04      |
| .....Guccggucuggcucuaguagagc.....                                                                                                    | 1     | 1     | S04      |
| .....auccggucuggcucuaguagagU.....                                                                                                    | 4     | 1     | S04      |
| .....auccggucuggcucuaguagGgc.....                                                                                                    | 1     | 1     | S04      |
| .....aAccggucuggcucuaguagagc.....                                                                                                    | 1     | 1     | S04      |
| .....auccggucuggcucuaguagagG.....                                                                                                    | 1     | 1     | S04      |
| .....aCccggucuggcucuaguagagc.....                                                                                                    | 1     | 1     | S04      |
| .....auccggucucCgcucuaguagagca.....                                                                                                  | 2     | 1     | S04      |
| .....auccggucAggcucuaguagagca.....                                                                                                   | 1     | 1     | S04      |
| .....auccggucugUcucuaguagagca.....                                                                                                   | 1     | 1     | S04      |
| .....auccggucuggcucuagCagagca.....                                                                                                   | 2     | 1     | S04      |
| .....auccggucuggcCcuaguagagca.....                                                                                                   | 1     | 1     | S04      |
| .....auccggucuggcucuaguagagcG.....                                                                                                   | 12    | 1     | S04      |
| .....auccAgucuggcucuaguagagca.....                                                                                                   | 1     | 1     | S04      |
| .....auccggucuggcucCaguagagca.....                                                                                                   | 1     | 1     | S04      |
| .....auccggucuggcucuaguagagAa.....                                                                                                   | 1     | 1     | S04      |
| .....auccggucuggcucuaguagagca.....                                                                                                   | 144   | 0     | S04      |
| .....auccggucuggcucuaguagaAca.....                                                                                                   | 2     | 1     | S04      |
| .....aCccggucuggcucuaguagagca.....                                                                                                   | 2     | 1     | S04      |
| .....auccggucuggcucuaguagagcau.....                                                                                                  | 1     | 0     | S04      |
| .....auccggucuggcucuaguagagcUu.....                                                                                                  | 1     | 1     | S04      |
| .....uccggucuggcucuaguagagU.....                                                                                                     | 1     | 1     | S04      |
| .....uccggucuggcucuaguagagc.....                                                                                                     | 2     | 0     | S04      |
| .....uccggucuggcucuaguagagca.....                                                                                                    | 5     | 0     | S04      |
| .....uccggucuggAucucuaguagagca.....                                                                                                  | 1     | 1     | S04      |
| .....uccggucuggcucuaguagagcaG.....                                                                                                   | 2     | 1     | S04      |
| .....uccggucuggcucGaguagagcau.....                                                                                                   | 1     | 1     | S04      |
| .....uccggucuggcucuaguagagcaA.....                                                                                                   | 1     | 1     | S04      |
| .....Nccggucuggcucuaguagagcau.....                                                                                                   | 1     | 1     | S04      |
| .....uccggucuggcucuagGagagcau.....                                                                                                   | 1     | 1     | S04      |
| .....ucUggucuggcucuaguagagcau.....                                                                                                   | 1     | 1     | S04      |
| .....uccggucuggcucuaguagagcaC.....                                                                                                   | 3     | 1     | S04      |
| .....uccggucuggcucuUguagagcau.....                                                                                                   | 1     | 1     | S04      |
| .....uccggucuggcAcucuaguagagcau.....                                                                                                 | 1     | 1     | S04      |
| .....uccggucuggcucuaguagagcau.....                                                                                                   | 39    | 0     | S04      |
| .....uccggucuggcCcuaguagagcau.....                                                                                                   | 2     | 1     | S04      |
| .....uccggucuggcucuaguagagcauc.....                                                                                                  | 5     | 0     | S04      |
| .....ccggucuggcucuaguagagca.....                                                                                                     | 1     | 0     | S04      |
| .....ccggucuggcucuaguagagcau.....                                                                                                    | 1     | 0     | S04      |
| .....ccggucuggcAcucuaguagagcauc.....                                                                                                 | 1     | 1     | S04      |
| .....ccggucuggcucuaAaagagcauc.....                                                                                                   | 1     | 1     | S04      |
| .....ccggucuggcucuaguagagcauA.....                                                                                                   | 2     | 1     | S04      |
| .....ccAgucuggcucuaguagagcauc.....                                                                                                   | 1     | 1     | S04      |
| .....ccggucuggcucuaguagagcauc.....                                                                                                   | 44    | 0     | S04      |
| .....cggucuggcucuaguagagA.....                                                                                                       | 1     | 1     | S04      |
| .....cggucuggcucuaguagagca.....                                                                                                      | 1     | 0     | S04      |
| .....cggucuggcucuaguagagcauc.....                                                                                                    | 2     | 0     | S04      |
| .....cggucuggcucuaguagagcaucu.....                                                                                                   | 2     | 0     | S04      |
| .....ggucuggcucuaguagagca.....                                                                                                       | 1     | 0     | S04      |
| .....ucuaguagagcaucugUu.....                                                                                                         | 1     | 1     | S04      |
| .....cacggacauccgaucugacu.....                                                                                                       | 1     | 0     | S04      |
| .....acggacauccgaucugacucuagu.....                                                                                                   | 1     | 0     | S04      |
| .....cauccgaucugacucuaguggagU.....                                                                                                   | 1     | 1     | S04      |
| .....cauccgaucugacucuaguggagc.....                                                                                                   | 4     | 0     | S04      |
| .....auccgGucugacucuaguggagca.....                                                                                                   | 1     | 1     | S04      |
| .....auccgaucugacucuaguggagcG.....                                                                                                   | 1     | 1     | S04      |
| .....auccgaucugacucuaguggagca.....                                                                                                   | 12    | 0     | S04      |
| .....uccgaucugacucuaguggagcau.....                                                                                                   | 2     | 0     | S04      |
| .....ccgaucugacucuaguggagcauc.....                                                                                                   | 3     | 0     | S04      |

Provisional ID : chrCnn\_random\_3472734  
 Score total : 0.4  
 Score for star read(s) : 3.9  
 Score for read counts : -4.9  
 Score for mfe : 1.5  
 Score for randfold : 0  
 Score for cons. seed :  
 Total read count : 2  
 Mature read count : 1  
 Loop read count : 0  
 Star read count : 1

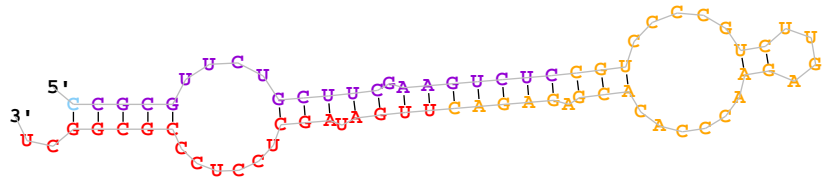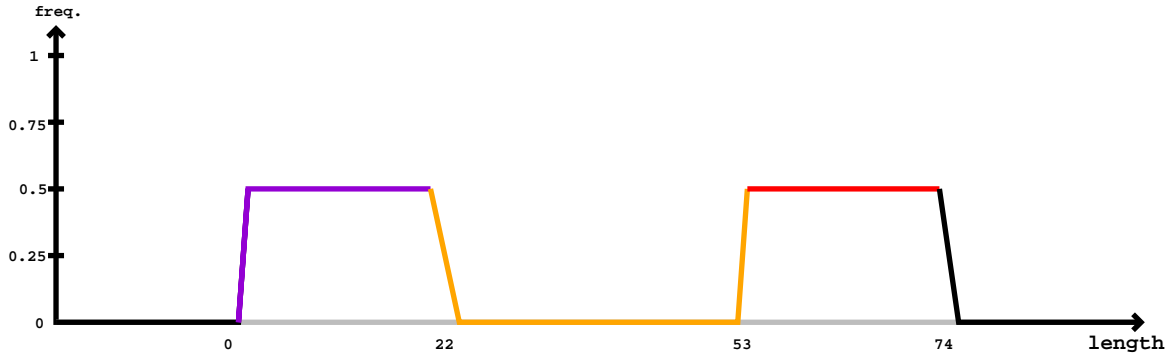

**Star**

**Mature**

|                                                                                                                                                                                                                                                                                                                                                                                                       |                                                                                          |
|-------------------------------------------------------------------------------------------------------------------------------------------------------------------------------------------------------------------------------------------------------------------------------------------------------------------------------------------------------------------------------------------------------|------------------------------------------------------------------------------------------|
| 5' - gcugagcaacgcgcaacgcccgcgguucugcuucgaagucucgucucccgucuuugagaaaccacacgagagacuugauagcucccccgcggucaucacagcuuuguucugguc<br>gcugagcaacgcgcaacgcccgcgguucugcuucgaagucucucccgucucccgucuuugagaaaccacacgagagacuugauagcucccccgcggucaucacagcuuuguucugguc<br>((((((((((.....((((((((((((((((((((((((((((((((((((.....((.....)))))))))))))))))))))))))))))))))))))))))))).<br>.....cgcgguucugcuucgaagucuc..... | -3' obs<br>exp<br>reads mm sample<br>1 0 S03<br>.....uugauagcucccccgcggu.....<br>1 0 S04 |
|-------------------------------------------------------------------------------------------------------------------------------------------------------------------------------------------------------------------------------------------------------------------------------------------------------------------------------------------------------------------------------------------------------|------------------------------------------------------------------------------------------|







Provisional ID : chrCnn\_random\_3481183  
 Score total : 0.6  
 Score for star read(s) : -1.3  
 Score for read counts : 0  
 Score for mfe : 1.9  
 Score for randfold : 0  
 Score for cons. seed :  
 Total read count : 149  
 Mature read count : 148  
 Loop read count : 0  
 Star read count : 1

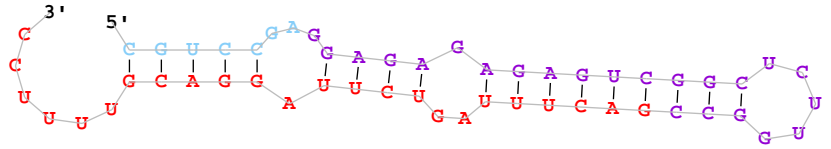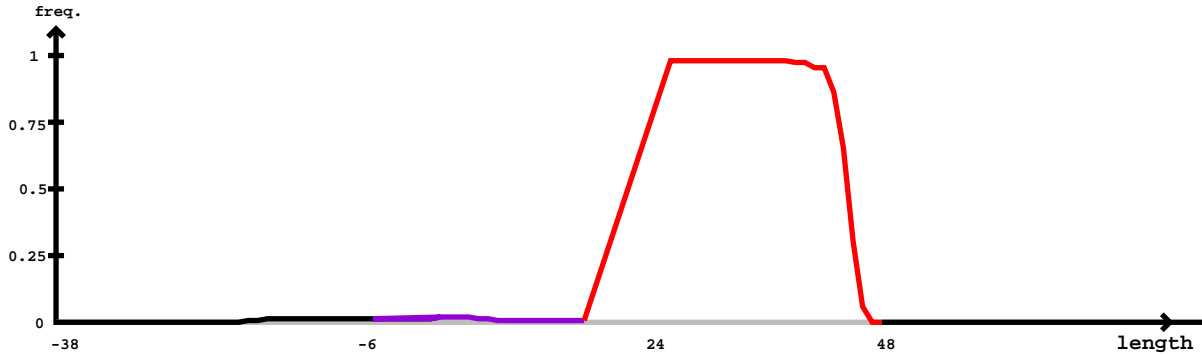

**Star**                      **Mature**

| 5' -                                                                                                                         | -3' | obs   |    |        |
|------------------------------------------------------------------------------------------------------------------------------|-----|-------|----|--------|
| ccguggccaaaagaggagagaaagagacggucguccgagagagagagucggcucuuuggccgacuuuagucuuaggacguuuuccaauuuucucuuuuuagaucuuuuccuau            |     |       |    |        |
| ccguggccaaaagaggagagaaagagacggucguccgagagagagagucggcucuuuggccgacuuuagucuuaggacguuuuccaauuuucucuuuuuagaucuuuuccuau            |     | reads | mm | sample |
| .....((.(.((((((((((((((.(.((.(.(((((((((((((((((((((((((((((((((((((((((((((((((((((((((((((((((((((((((((((((((((((((((((( |     |       |    |        |
| .....)aaagagagacggucguccgagagag.....                                                                                         |     | 1     | 0  | S03    |
| .....uggccgacuuuagucuuaggacg.....                                                                                            |     | 1     | 0  | S03    |
| .....uggccgacuuuagucuuaggacA.....                                                                                            |     | 1     | 0  | S03    |
| .....Cggccgacuuuagucuuaggacg.....                                                                                            |     | 3     | 1  | S03    |
| .....Cggccgacuuuagucuuaggacg.....                                                                                            |     | 1     | 1  | S03    |
| .....Cggccgacuuuagucuuaggacgu.....                                                                                           |     | 2     | 1  | S03    |
| .....uggccgacuuuagucuuaggacgu.....                                                                                           |     | 2     | 0  | S03    |
| .....uggccgacuuuagucuuaggacgu.....                                                                                           |     | 3     | 1  | S03    |
| .....uggccgacuuuagucuuaggacG.....                                                                                            |     | 1     | 1  | S03    |
| .....ggccgacuuuagucuuaggacgu.....                                                                                            |     | 1     | 0  | S03    |
| .....ggccgacuuuagucuuaggacgu.....                                                                                            |     | 1     | 1  | S03    |
| .....ggccgacuuuagucuuaggacgu.....                                                                                            |     | 1     | 1  | S03    |
| .....ggccgacuuuagucuuaggacgu.....                                                                                            |     | 20    | 0  | S03    |
| .....ggccgacuuuagucuuaggacgu.....                                                                                            |     | 4     | 0  | S03    |
| .....ggccgacuuuagucuuaggacgu.....                                                                                            |     | 1     | 1  | S03    |
| .....ggccgacuuuagucuuaggacgu.....                                                                                            |     | 1     | 1  | S03    |
| .....ggccgacuuuagucuuaggacgu.....                                                                                            |     | 1     | 1  | S03    |
| .....ggccgacuuuagucuuaggacgu.....                                                                                            |     | 1     | 1  | S03    |
| .....ggccgacuuuagucuuaggacgu.....                                                                                            |     | 1     | 1  | S03    |
| .....ggccgacuuuagucuuaggacgu.....                                                                                            |     | 1     | 1  | S03    |
| .....ggccgacuuuagucuuaggacgu.....                                                                                            |     | 1     | 1  | S03    |
| .....ggccgacuuuagucuuaggacgu.....                                                                                            |     | 1     | 1  | S03    |
| .....ggccgacuuuagucuuaggacgu.....                                                                                            |     | 2     | 0  | S03    |
| .....ggccgacuuuagucuuaggacgu.....                                                                                            |     | 1     | 1  | S03    |
| .....ggccgacuuuagucuuaggacgu.....                                                                                            |     | 1     | 1  | S03    |
| .....ggccgacuuuagucuuaggacgu.....                                                                                            |     | 2     | 0  | S03    |
| .....ggccgacuuuagucuuaggacgu.....                                                                                            |     | 1     | 1  | S03    |
| .....ggccgacuuuagucuuaggacgu.....                                                                                            |     | 2     | 0  | S03    |
| .....aaagagagacggucguccgagagag.....                                                                                          |     | 1     | 0  | S04    |
| .....ggagagagagucggcucuuuggcc.....                                                                                           |     | 1     | 0  | S04    |
| .....cuuggccgacuuuagucuuaggac.....                                                                                           |     | 1     | 0  | S04    |
| .....cuuggccgacuuuagucuuaggac.....                                                                                           |     | 1     | 1  | S04    |

Star

Mature

|                                                                                                                   |    |   |     |
|-------------------------------------------------------------------------------------------------------------------|----|---|-----|
| ccguggccaaaagaggagagaaagagacggucguccgaggagagagagucggcucuggccgacuuuagucuuaggacguuuuccauuuuucucuuuuuaagaucuuuuccuau |    |   |     |
| .....uuggccgacuuuagucuuaggacg.....                                                                                | 3  | 0 | S04 |
| .....uuggccgacuuuagucuuCgacg.....                                                                                 | 1  | 1 | S04 |
| .....uuggccgacuuuagucuuaggacA.....                                                                                | 3  | 1 | S04 |
| .....uggccgacuuuagucuuagga.....                                                                                   | 1  | 0 | S04 |
| .....uggccgacuuuagucuuaggacA.....                                                                                 | 2  | 1 | S04 |
| .....Cggccgacuuuagucuuaggacgu.....                                                                                | 3  | 1 | S04 |
| .....uggccgacuuuagucuuaggacgG.....                                                                                | 1  | 1 | S04 |
| .....uggccgacuuuagucuuaggacgu.....                                                                                | 10 | 0 | S04 |
| .....ggccgacuuuagucuuaggacA.....                                                                                  | 1  | 1 | S04 |
| .....ggccgacuuuagucuuaggacgC.....                                                                                 | 1  | 1 | S04 |
| .....ggccgacuuuagucuuaggacguA.....                                                                                | 1  | 1 | S04 |
| .....ggccgacuuuagucuuaggacguC.....                                                                                | 2  | 1 | S04 |
| .....ggccgacuuuagucuuaggacguG.....                                                                                | 1  | 1 | S04 |
| .....ggccgacuuuagucuuaggacguu.....                                                                                | 21 | 0 | S04 |
| .....ggccgacuuuagucuuaggacguuG.....                                                                               | 1  | 1 | S04 |
| .....ggccgacuuuagucuuaggacgA.....                                                                                 | 1  | 1 | S04 |
| .....ggccgacuuuagucuuaggacguA.....                                                                                | 2  | 1 | S04 |
| .....ggccgacuuuagucuuaggacguu.....                                                                                | 1  | 1 | S04 |
| .....ggccgacuuuagucuuaggacguuu.....                                                                               | 8  | 0 | S04 |
| .....ccgacuuuagucuuCgacgu.....                                                                                    | 1  | 1 | S04 |
| .....ccgacuuuagucuuaggacgu.....                                                                                   | 2  | 0 | S04 |
| .....ccgacuuuagucuuaggacgAuu.....                                                                                 | 1  | 1 | S04 |
| .....ccgacuuuagucuuaggacguuu.....                                                                                 | 9  | 0 | S04 |
| .....ccgacuuuagucuuaggacguuC.....                                                                                 | 3  | 1 | S04 |
| .....ccgacuuuagucuuCgacguuuu.....                                                                                 | 1  | 1 | S04 |
| .....ccgacuuuagucuuaggacguuuu.....                                                                                | 4  | 0 | S04 |
| .....cgacuuuagucuuaggacA.....                                                                                     | 1  | 1 | S04 |
| .....cgacuuuagucuuaggacguu.....                                                                                   | 1  | 0 | S04 |
| .....cgacuuuagucuuaggacguuu.....                                                                                  | 1  | 0 | S04 |





Provisional ID : chrCnn\_random\_3498258  
 Score total : 8.3  
 Score for star read(s) : 3.9  
 Score for read counts : 2.7  
 Score for mfe : 1.7  
 Score for randfold : 0  
 Score for cons. seed :  
 Total read count : 17  
 Mature read count : 13  
 Loop read count : 0  
 Star read count : 4

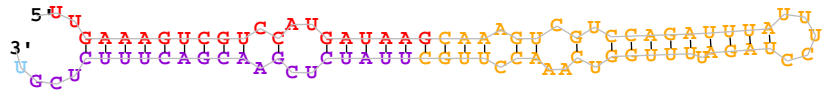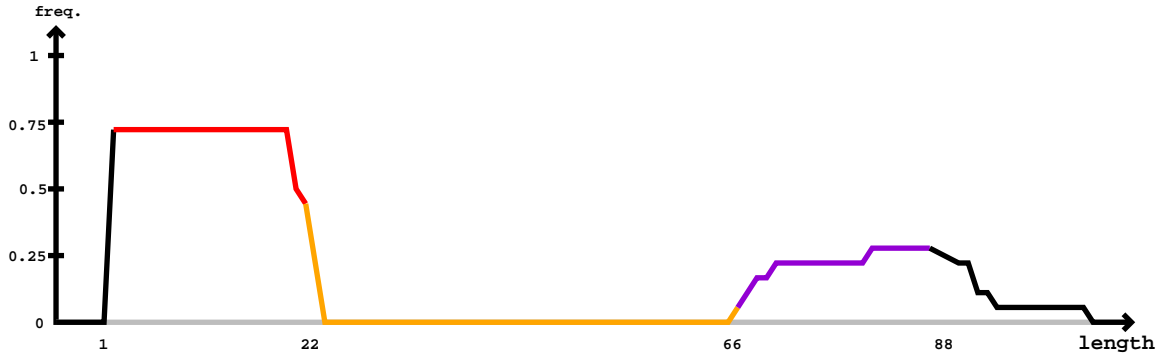

**Mature**

**Star**

| 5' -                                                                                                                                                |  | -3' | obs | exp | reads | mm | sample |
|-----------------------------------------------------------------------------------------------------------------------------------------------------|--|-----|-----|-----|-------|----|--------|
| uua <u>cuugaaagucguccaugauaag</u> caaagucguccagauuuuuuuccuagauuuuggucaaa <u>ccuugc</u> uu <u>aucucgaacgacu</u> uu <u>ucucg</u> uaagucgucuaccuggacga |  |     |     |     | 1     | 0  | S03    |
| uua <u>cuugaaagucguccaugauaag</u> caaagucguccagauuuuuuuccuagauuuuggucaaa <u>ccuugc</u> uu <u>aucucgaacgacu</u> uu <u>ucucg</u> uaagucgucuaccuggacga |  |     |     |     | 1     | 1  | S03    |
| .....uugaaagucguccaugaua.....                                                                                                                       |  |     |     |     | 1     | 1  | S03    |
| .....uugaaagucguccaugaua.....                                                                                                                       |  |     |     |     | 3     | 0  | S04    |
| .....uugaaagucguccaugaua.....                                                                                                                       |  |     |     |     | 1     | 0  | S04    |
| .....uugaaagucguUcaugauaag.....                                                                                                                     |  |     |     |     | 1     | 1  | S04    |
| .....uugaaagucguccaugauaag.....                                                                                                                     |  |     |     |     | 7     | 0  | S04    |
| .....uu <u>aucucgaacgacu</u> uu <u>ucucU</u> .....                                                                                                  |  |     |     |     | 1     | 1  | S04    |
| ..... <u>cucgGacgacu</u> uu <u>ucucg</u> uaaguc.....                                                                                                |  |     |     |     | 1     | 1  | S04    |
| .....uu <u>ucucg</u> uaagucgucuaccugg.....                                                                                                          |  |     |     |     | 1     | 0  | S04    |



Mature

Star

|                                   |                               |                               |    |   |
|-----------------------------------|-------------------------------|-------------------------------|----|---|
| aaauuuuggcggcugguuugcccgguaaaaaaa | aaauuuccgaggaauuccgacugacacuu | aaauuuccgaggaauuccgaggaauuccg |    |   |
| .....                             | .....                         | .....                         | 2  | 0 |
| .....                             | .....                         | .....                         | 1  | 1 |
| .....                             | .....                         | .....                         | 1  | 0 |
| .....                             | .....                         | .....                         | 1  | 1 |
| .....                             | .....                         | .....                         | 1  | 1 |
| .....                             | .....                         | .....                         | 1  | 0 |
| .....                             | .....                         | .....                         | 2  | 1 |
| .....                             | .....                         | .....                         | 1  | 1 |
| .....                             | .....                         | .....                         | 1  | 0 |
| .....                             | .....                         | .....                         | 1  | 1 |
| .....                             | .....                         | .....                         | 1  | 1 |
| .....                             | .....                         | .....                         | 7  | 0 |
| .....                             | .....                         | .....                         | 1  | 1 |
| .....                             | .....                         | .....                         | 3  | 0 |
| .....                             | .....                         | .....                         | 3  | 0 |
| .....                             | .....                         | .....                         | 1  | 0 |
| .....                             | .....                         | .....                         | 1  | 1 |
| .....                             | .....                         | .....                         | 1  | 1 |
| .....                             | .....                         | .....                         | 7  | 0 |
| .....                             | .....                         | .....                         | 24 | 0 |
| .....                             | .....                         | .....                         | 7  | 1 |
| .....                             | .....                         | .....                         | 1  | 1 |
| .....                             | .....                         | .....                         | 1  | 0 |
| .....                             | .....                         | .....                         | 3  | 1 |
| .....                             | .....                         | .....                         | 2  | 0 |
| .....                             | .....                         | .....                         | 5  | 0 |
| .....                             | .....                         | .....                         | 5  | 0 |
| .....                             | .....                         | .....                         | 7  | 1 |
| .....                             | .....                         | .....                         | 2  | 0 |
| .....                             | .....                         | .....                         | 1  | 1 |
| .....                             | .....                         | .....                         | 1  | 1 |
| .....                             | .....                         | .....                         | 1  | 0 |
| .....                             | .....                         | .....                         | 1  | 0 |
| .....                             | .....                         | .....                         | 1  | 1 |
| .....                             | .....                         | .....                         | 3  | 0 |
| .....                             | .....                         | .....                         | 1  | 0 |
| .....                             | .....                         | .....                         | 1  | 1 |
| .....                             | .....                         | .....                         | 1  | 1 |
| .....                             | .....                         | .....                         | 1  | 1 |
| .....                             | .....                         | .....                         | 3  | 1 |
| .....                             | .....                         | .....                         | 1  | 1 |
| .....                             | .....                         | .....                         | 1  | 1 |





Mature

Star

aaucugagccuccauucagucugguuugauguggaacgacgaagaagccugucccagccugucaagauaagaccagcucccuuagccaguuccggguucugcuauuca

|                                      |    |   |     |
|--------------------------------------|----|---|-----|
| .....cugguuugaCuggaacgacg.....       | 1  | 1 | S03 |
| .....Ncugguuugauguggaacgacg.....     | 1  | 1 | S03 |
| .....cAugguuugauguggaacgacg.....     | 1  | 1 | S03 |
| .....cugguuugauguggaacgacgU.....     | 5  | 1 | S03 |
| .....ccuggGuugauguggaacgacga.....    | 1  | 1 | S03 |
| .....cugguuugauguggaacgacgG.....     | 1  | 1 | S03 |
| .....ccuggCuugauguggaacgacga.....    | 1  | 1 | S03 |
| .....ccugguuugaauUgaacgacga.....     | 1  | 1 | S03 |
| .....cugguuugGuuggaacgacga.....      | 1  | 1 | S03 |
| .....cugguuugauguggaacgacga.....     | 30 | 0 | S03 |
| .....ccugguuugauguggaacgacgaa.....   | 1  | 0 | S03 |
| .....cugguuuCauuggaacgacgaag.....    | 1  | 1 | S03 |
| .....ccugguuUauuggaacgacgaag.....    | 2  | 1 | S03 |
| .....Ucugguuugauguggaacgacgaag.....  | 2  | 1 | S03 |
| .....cugguGugauguggaacgacgaag.....   | 1  | 1 | S03 |
| .....ccugguuugaAuggaacgacgaag.....   | 1  | 1 | S03 |
| .....Acugguuugauguggaacgacgaag.....  | 1  | 1 | S03 |
| .....Gcugguuugauguggaacgacgaag.....  | 1  | 1 | S03 |
| .....cAugguuugauguggaacgacgaag.....  | 4  | 1 | S03 |
| .....ccGgguuugauguggaacgacgaag.....  | 1  | 1 | S03 |
| .....cugguuugauguggaacgacgaag.....   | 51 | 0 | S03 |
| .....ccuggCuugauguggaacgacgaag.....  | 1  | 1 | S03 |
| .....ccugguuugauguggaacgacgaagU..... | 1  | 1 | S03 |
| .....cugguuugauguggaacgacgaaga.....  | 1  | 0 | S03 |
| .....cugguuugauguggaacga.....        | 1  | 0 | S03 |
| .....cuggGuugauguggaacgac.....       | 1  | 1 | S03 |
| .....cugguuugauguggaacgac.....       | 1  | 0 | S03 |
| .....cugguuugauguggaacgacU.....      | 1  | 1 | S03 |
| .....cugguuugauguggaacgacg.....      | 10 | 0 | S03 |
| .....cugAuuugauguggaacgacg.....      | 1  | 1 | S03 |
| .....cugguGugauguggaacgacg.....      | 1  | 1 | S03 |
| .....cugguuugaAuggaacgacga.....      | 1  | 1 | S03 |
| .....cugguuugauguggaacgacgU.....     | 5  | 1 | S03 |
| .....cugguuugauguggaacgacga.....     | 20 | 0 | S03 |
| .....Gugguuugauguggaacgacga.....     | 1  | 1 | S03 |
| .....cugguuugauguggaacgacgG.....     | 2  | 1 | S03 |
| .....cugguuugauguggaacgacgaa.....    | 1  | 0 | S03 |
| .....cugguuugauguggaacgacgaG.....    | 1  | 1 | S03 |
| .....cugguuugaauUgaacgacgaag.....    | 2  | 1 | S03 |
| .....cuggCuugauguggaacgacgaag.....   | 2  | 1 | S03 |
| .....cugAuuugauguggaacgacgaag.....   | 2  | 1 | S03 |
| .....cugguuugauguggaacgacgaag.....   | 21 | 0 | S03 |
| .....Augguuugauguggaacgacgaag.....   | 2  | 1 | S03 |
| .....cugguuugauguggaacgacgaau.....   | 1  | 1 | S03 |
| .....cugguuugaCuggaacgacgaag.....    | 1  | 1 | S03 |
| .....cugguuugauguggaacgacUaaga.....  | 1  | 1 | S03 |
| .....cGgguuugauguggaacgacgaaga.....  | 1  | 1 | S03 |
| .....cugguuugauguggaacgacgaagG.....  | 1  | 1 | S03 |
| .....cugguuugauguggaCcgaacgaaga..... | 1  | 1 | S03 |
| .....cugguuugaauUgaacgacgaaga.....   | 1  | 1 | S03 |
| .....cugguuugauguggaacgacgaagU.....  | 3  | 1 | S03 |
| .....cuggGuugauguggaacgacgaaga.....  | 1  | 1 | S03 |
| .....cugguuugauguggaacgacgaaCa.....  | 1  | 1 | S03 |
| .....cugguuugGuuggaacgacgaaga.....   | 1  | 1 | S03 |
| .....cugguuugauguggaacgacgaaga.....  | 47 | 0 | S03 |
| .....cugguuugauguggaGcgacgaaga.....  | 1  | 1 | S03 |
| .....cugguuugauguggaacgUcgaaga.....  | 1  | 1 | S03 |
| .....Augguuugauguggaacgacgaaga.....  | 3  | 1 | S03 |
| .....cugguuugauguggaaAgcgaaga.....   | 1  | 1 | S03 |
| .....cugguuugauguggaacgacgaagaG..... | 1  | 1 | S03 |
| .....ugguuugauguggaacgaA.....        | 1  | 1 | S03 |
| .....ugguuugauguggaacgacg.....       | 1  | 0 | S03 |
| .....ugguuugauguggaacgacga.....      | 8  | 0 | S03 |
| .....ugguuugauguggaacgacgaa.....     | 1  | 0 | S03 |
| .....ugguuugauguggaacgacgaag.....    | 26 | 0 | S03 |
| .....ugguuugauguggaacgacgaau.....    | 1  | 1 | S03 |
| .....ugguuugauguggaGcgacgaag.....    | 1  | 1 | S03 |
| .....ugguuugauguggaacgUcgaag.....    | 1  | 1 | S03 |
| .....ugguuugauguggaacgacgaCg.....    | 1  | 1 | S03 |
| .....uggGuugauguggaacgacgaag.....    | 1  | 1 | S03 |

Mature

Star

|                                                                                                                        |    |   |     |
|------------------------------------------------------------------------------------------------------------------------|----|---|-----|
| aaucugagccuccauucaguc <u>ccugguuugaauuggaacgacgaagaagc</u> ugucccagccugucaagauaagaccagcucccuuagccaguuccggguucugcuauuca |    |   |     |
| .....ugguuu <u>U</u> auuggaacgacgaaga.....                                                                             | 1  | 1 | S03 |
| .....ugguuu <u>U</u> auuggaacgacgaaga.....                                                                             | 3  | 0 | S03 |
| .....ugguuu <u>U</u> auuggaacgacgaaga.....                                                                             | 2  | 0 | S03 |
| .....gguuu <u>U</u> auuggaacgacCa.....                                                                                 | 1  | 1 | S03 |
| .....gguuu <u>U</u> auuggaacgacgaaga.....                                                                              | 3  | 0 | S03 |
| .....gguuu <u>U</u> auuggaacgacgaagaag.....                                                                            | 3  | 0 | S03 |
| .....gguuu <u>U</u> auuggaacgacgaagaag.....                                                                            | 1  | 1 | S03 |
| .....gguuu <u>U</u> auuggaacgacGaag.....                                                                               | 1  | 1 | S03 |
| .....gguuu <u>U</u> auuggaacgacgaagaA.....                                                                             | 1  | 1 | S03 |
| .....gguuu <u>U</u> auuggaacgacgaagaagc.....                                                                           | 1  | 0 | S03 |
| .....g <u>U</u> uuga <u>U</u> auuggaacgacgaag.....                                                                     | 1  | 1 | S03 |
| .....g <u>U</u> uuga <u>U</u> auuggaacgacUaagc.....                                                                    | 1  | 1 | S03 |
| .....g <u>U</u> uuga <u>U</u> auuggaacgacgaagaagc.....                                                                 | 1  | 1 | S03 |
| .....g <u>U</u> uuga <u>U</u> auuggaacgacGagaagc.....                                                                  | 1  | 1 | S03 |
| .....g <u>U</u> uuga <u>U</u> auuggaacgacgaagaagc.....                                                                 | 6  | 0 | S03 |
| ..... <u>U</u> uuu <u>U</u> auuggaacgacgaagaagcc.....                                                                  | 1  | 1 | S03 |
| .....uuu <u>U</u> auuggaacgacgaA <u>U</u> .....                                                                        | 1  | 1 | S03 |
| .....uuu <u>U</u> auuggaacgacgaaga.....                                                                                | 1  | 1 | S03 |
| .....uuu <u>U</u> auuggaacgacgaag <u>U</u> .....                                                                       | 1  | 1 | S03 |
| .....uuu <u>U</u> auuggaacgacgaaga.....                                                                                | 1  | 1 | S03 |
| .....uuu <u>U</u> auuggaacgacgaaga.....                                                                                | 6  | 0 | S03 |
| .....uuu <u>U</u> auuggaacgacgaaga.....                                                                                | 9  | 0 | S03 |
| .....uuu <u>U</u> auuggaacgacgaagaA.....                                                                               | 4  | 1 | S03 |
| .....uuu <u>U</u> auuggaacgacgaagaag.....                                                                              | 1  | 1 | S03 |
| ..... <u>C</u> uuu <u>U</u> auuggaacgacgaagaag.....                                                                    | 1  | 1 | S03 |
| .....uuu <u>U</u> auuggaacgacG <u>U</u> agaag.....                                                                     | 1  | 1 | S03 |
| .....uuu <u>U</u> auuggaacgacgaagaag.....                                                                              | 1  | 1 | S03 |
| .....uuu <u>U</u> auuggaacgacgaagaag.....                                                                              | 17 | 0 | S03 |
| ..... <u>G</u> uuu <u>U</u> auuggaacgacgaagaag.....                                                                    | 1  | 1 | S03 |
| ..... <u>A</u> uuu <u>U</u> auuggaacgacgaagaag.....                                                                    | 1  | 1 | S03 |
| .....uuu <u>U</u> auuggaaA <u>g</u> acgaagaag.....                                                                     | 1  | 1 | S03 |
| .....uuu <u>U</u> auuggaacga <u>U</u> gaagaagcc.....                                                                   | 1  | 1 | S03 |
| .....uuu <u>U</u> auuggaacgGcgaagaagcc.....                                                                            | 1  | 1 | S03 |
| .....u <u>U</u> auuggaacgacgaagaA.....                                                                                 | 2  | 1 | S03 |
| .....u <u>U</u> auuggaacgacgaagaag.....                                                                                | 4  | 0 | S03 |
| .....u <u>U</u> auuggaacgacgaagaagc.....                                                                               | 10 | 0 | S03 |
| .....u <u>U</u> auuggaacgacgaagaGgc.....                                                                               | 1  | 1 | S03 |
| .....u <u>U</u> g <u>U</u> uuga <u>U</u> auuggaacgacgaagaagc.....                                                      | 1  | 1 | S03 |
| .....u <u>U</u> g <u>U</u> uuga <u>U</u> auuggaacga <u>U</u> gaagaagc.....                                             | 1  | 1 | S03 |
| .....u <u>U</u> g <u>U</u> uuga <u>U</u> auuggaacgacgaagaagcc.....                                                     | 1  | 0 | S03 |
| .....u <u>U</u> g <u>U</u> uuga <u>U</u> auuggaacgacgaaga.....                                                         | 1  | 0 | S03 |
| .....u <u>U</u> g <u>U</u> uuga <u>U</u> auuggaacgacgaagaag.....                                                       | 1  | 0 | S03 |
| .....u <u>U</u> g <u>U</u> uuga <u>U</u> auuggaacgacgaagaagc.....                                                      | 1  | 0 | S03 |
| .....u <u>U</u> g <u>U</u> uuga <u>U</u> auuggaacgacgaagaagcA.....                                                     | 2  | 1 | S03 |
| .....g <u>U</u> uuga <u>U</u> auuggaacgacgaagGagc.....                                                                 | 1  | 1 | S03 |
| .....g <u>U</u> uuga <u>U</u> auuggaacgacgaagaagcA.....                                                                | 1  | 1 | S03 |
| ..... <u>U</u> auuggaacgacgaagaagcc.....                                                                               | 1  | 1 | S03 |
| .....auuggaacgacgaagaA <u>U</u> .....                                                                                  | 1  | 1 | S03 |
| .....ugucccagccugucaagauaagacc <u>U</u> .....                                                                          | 1  | 1 | S03 |
| .....a <u>A</u> uccgguuuga <u>U</u> auuggaacgacg.....                                                                  | 3  | 1 | S04 |
| .....gGccgguuuga <u>U</u> auuggaacga.....                                                                              | 1  | 1 | S04 |
| .....guccgguuuga <u>U</u> auuggaacgacg.....                                                                            | 1  | 0 | S04 |
| .....guccgguuuga <u>U</u> auuggaacgacA.....                                                                            | 4  | 1 | S04 |
| .....guccgguuuga <u>U</u> auuggaaGgacga.....                                                                           | 1  | 1 | S04 |
| .....guccgguuuga <u>U</u> auuggaacgacga.....                                                                           | 1  | 0 | S04 |
| .....uccgguuuga <u>U</u> auuggaacg.....                                                                                | 1  | 0 | S04 |
| .....uccgguuuga <u>U</u> auuggaacgac.....                                                                              | 13 | 0 | S04 |
| .....uccgguuuga <u>U</u> auuggaacgaG.....                                                                              | 1  | 1 | S04 |
| .....Cccgguuuga <u>U</u> auuggaacgacg.....                                                                             | 1  | 1 | S04 |
| .....u <u>U</u> ccgguuuga <u>U</u> auuggaacgacg.....                                                                   | 1  | 1 | S04 |
| .....uccgguuuga <u>U</u> auuggaacgacg.....                                                                             | 27 | 0 | S04 |
| .....uccgguuuga <u>U</u> auuggaacgacg.....                                                                             | 1  | 1 | S04 |
| .....uccgguuuga <u>U</u> auuggaacgacgG.....                                                                            | 3  | 1 | S04 |
| .....uccgguuuga <u>U</u> auuggaacgacga.....                                                                            | 1  | 1 | S04 |
| .....uccgguuuga <u>U</u> auuggaacgacgU.....                                                                            | 1  | 1 | S04 |
| .....uccgguuuga <u>U</u> auuggaacgacga.....                                                                            | 18 | 0 | S04 |
| .....uc <u>A</u> uggguuuga <u>U</u> auuggaacgacga.....                                                                 | 1  | 1 | S04 |
| .....uccgguuuga <u>U</u> auuggaacgacga.....                                                                            | 1  | 1 | S04 |
| .....uccgguuuga <u>U</u> auuggaacgacgUa.....                                                                           | 1  | 1 | S04 |

Mature

Star

aaucugagccuccauucagucugguuugauuggaacgacgaagaagccuguccagccugucaagaagaccagcucccuuagccaguuccggguucugcuauuca

|                                         |    |   |     |
|-----------------------------------------|----|---|-----|
| .....uccugguCugauuggaacgacgaa.....      | 1  | 1 | S04 |
| .....uccugguuuugauuggaacgacgaa.....     | 8  | 0 | S04 |
| .....uccugguuuugauuggaacgacgaag.....    | 1  | 0 | S04 |
| .....ccugguuugauuggaacga.....           | 1  | 0 | S04 |
| .....Ucugguuuugauuggaacgac.....         | 1  | 1 | S04 |
| .....ccugguuugauuggaacgac.....          | 1  | 0 | S04 |
| .....ccugguuugauuggaacgUcg.....         | 1  | 1 | S04 |
| .....ccugguuuugauuggaGcgacg.....        | 1  | 1 | S04 |
| .....ccugguuuugauuggaacgacg.....        | 17 | 0 | S04 |
| .....ccugguuugauuggaacgacU.....         | 2  | 1 | S04 |
| .....Ncugguuuugauuggaacgacga.....       | 1  | 1 | S04 |
| .....ccugguuugauCggaacgacga.....        | 1  | 1 | S04 |
| .....ccuAguuuugauuggaacgacga.....       | 2  | 1 | S04 |
| .....ccugguuuugauuggaacgacgG.....       | 3  | 1 | S04 |
| .....Ucugguuuugauuggaacgacga.....       | 1  | 1 | S04 |
| .....ccugguCugauuggaacgacga.....        | 1  | 1 | S04 |
| .....ccugguuuugauuggaacgacgU.....       | 1  | 1 | S04 |
| .....ccugguuugauuggaacgacga.....        | 24 | 0 | S04 |
| .....ccugguuugaCuggaacgacga.....        | 1  | 1 | S04 |
| .....ccugguuAgauggaacgacga.....         | 1  | 1 | S04 |
| .....ccugguuuugauuggaacgacgaa.....      | 1  | 0 | S04 |
| .....ccugguuugauuggaacgacgGa.....       | 1  | 1 | S04 |
| .....ccuggCuugauuggaacgacgaag.....      | 2  | 1 | S04 |
| .....ccugguuugauuggaacgacgaaU.....      | 1  | 1 | S04 |
| .....ccugguuugauuggaacgaAgaag.....      | 4  | 1 | S04 |
| .....ccuggGuugauuggaacgacgaag.....      | 2  | 1 | S04 |
| .....ccugguCugauuggaacgacgaag.....      | 1  | 1 | S04 |
| .....cAugguuugauuggaacgacgaag.....      | 2  | 1 | S04 |
| .....ccugguuuugauuggaaAgacgaag.....     | 2  | 1 | S04 |
| .....ccugguuugauuggaacgacgaag.....      | 84 | 0 | S04 |
| .....ccugguuugauuggaacgacgGag.....      | 1  | 1 | S04 |
| .....Gcugguuuugauuggaacgacgaag.....     | 1  | 1 | S04 |
| .....ccugguuugauAuggaacgacgaag.....     | 1  | 1 | S04 |
| .....ccuAguuuugauuggaacgacgaag.....     | 2  | 1 | S04 |
| .....ccugguuuugGuuggaacgacgaag.....     | 1  | 1 | S04 |
| .....ccugguuugauuggaacgacgaagG.....     | 1  | 1 | S04 |
| .....ccugguuugauuggaacgaAgaagaagcc..... | 1  | 1 | S04 |
| .....cugguuuugauuggaacgac.....          | 2  | 0 | S04 |
| .....Gugguuuugauuggaacgacg.....         | 1  | 1 | S04 |
| .....cugguuugaCuggaacgacg.....          | 2  | 1 | S04 |
| .....cugguuuugauuggaacgacg.....         | 10 | 0 | S04 |
| .....cugguuugauuggaacgacgU.....         | 2  | 1 | S04 |
| .....cugguuugauuggaacgacgG.....         | 1  | 1 | S04 |
| .....cugguuuugauuggaacgacga.....        | 18 | 0 | S04 |
| .....cugguuugauUgaacgacga.....          | 1  | 1 | S04 |
| .....cugguuugauuggaacgacgaCga.....      | 1  | 1 | S04 |
| .....cugguuuCauuggaacgacgaaga.....      | 1  | 1 | S04 |
| .....cuCguuugauuggaacgacgaaga.....      | 1  | 1 | S04 |
| .....cuAguuugauuggaacgacgaaga.....      | 1  | 1 | S04 |
| .....Gugguuuugauuggaacgacgaaga.....     | 3  | 1 | S04 |
| .....cugguuuugauAuggaacgacgaaga.....    | 1  | 1 | S04 |
| .....cugguuuugGuuggaacgacgaaga.....     | 1  | 1 | S04 |
| .....Augguuuugauuggaacgacgaaga.....     | 3  | 1 | S04 |
| .....cuggGuugauuggaacgacgaaga.....      | 4  | 1 | S04 |
| .....cugguuugauuggaaAgacgaaga.....      | 1  | 1 | S04 |
| .....cugguuuugauuggaacgacgaagU.....     | 2  | 1 | S04 |
| .....cugguuugauuggaacgacgaGga.....      | 1  | 1 | S04 |
| .....cugguuuugauuggaacgacgaagG.....     | 3  | 1 | S04 |
| .....ugguuuugauuggaacgacg.....          | 1  | 0 | S04 |

Mature

Star

aaucugagccuccauucagucugguuugauuggaacgcgaagaagcugucccagccugucaagaagaccagcuccccuagccaguuccggguucugcauucaa

|                                    |    |   |     |
|------------------------------------|----|---|-----|
| .....ugguuugauuggaGcgacg.....      | 1  | 1 | S04 |
| .....ugguuugauuggaacgcgU.....      | 1  | 1 | S04 |
| .....ugguuugGuuggaacgcgga.....     | 1  | 1 | S04 |
| .....uggCuugauuggaacgcgga.....     | 1  | 1 | S04 |
| .....ugguuugauuggaacgcgga.....     | 4  | 0 | S04 |
| .....ugguuugauGggaacgcggaag.....   | 1  | 1 | S04 |
| .....ugguuugauugUaacgcggaag.....   | 2  | 1 | S04 |
| .....ugguuugauuggaacgcggaag.....   | 14 | 0 | S04 |
| .....uAguugauuggaacgcggaag.....    | 1  | 1 | S04 |
| .....uggGuugauuggaacgcggaag.....   | 1  | 1 | S04 |
| .....ugguuugauuggaacgcggaaga.....  | 7  | 0 | S04 |
| .....ugguuugauuggaacgcggaagC.....  | 1  | 1 | S04 |
| .....ugguuugauuggaacgcggaagaa..... | 3  | 0 | S04 |
| .....gguugauuggaacgcgga.....       | 1  | 0 | S04 |
| .....gAuugauuggaacgcggaaga.....    | 1  | 1 | S04 |
| .....gguugauuggaacgcggaagaag.....  | 6  | 0 | S04 |
| .....Aguugauuggaacgcggaagaag.....  | 3  | 1 | S04 |
| .....gguugauuggaacgcggaCgaagc..... | 1  | 1 | S04 |
| .....gguugauuggaacgcggaagaaCc..... | 1  | 1 | S04 |
| .....gguugauuggaacgcggaagaagc..... | 1  | 0 | S04 |
| .....guugauuggaacgcgGgaagc.....    | 1  | 1 | S04 |
| .....guugauuggaacgaUgaagaagc.....  | 1  | 1 | S04 |
| .....guugauuggaacgcggaagaagc.....  | 20 | 0 | S04 |
| .....guugauuggaacgcggaagaagc.....  | 1  | 1 | S04 |
| .....guuuUauuggaacgcggaagaagc..... | 1  | 1 | S04 |
| .....guAugauuggaacgcggaagaagc..... | 1  | 1 | S04 |
| .....uuugauuggaacgcggaaga.....     | 5  | 0 | S04 |
| .....uuugauuggaacgcggaCga.....     | 1  | 1 | S04 |
| .....uuugauuggaGcgacgaaga.....     | 1  | 1 | S04 |
| .....uuugaAuggaacgcggaagaa.....    | 1  | 1 | S04 |
| .....uuugauuggaacgcggaagaa.....    | 5  | 0 | S04 |
| .....uuugauuggaacgcggaagaaU.....   | 1  | 1 | S04 |
| .....Guugauuggaacgcggaagaag.....   | 2  | 1 | S04 |
| .....uuugauuggaacgcggaagGag.....   | 1  | 1 | S04 |
| .....uuuCauggaacgcggaagaag.....    | 1  | 1 | S04 |
| .....uuugauuggaacgcggaagaag.....   | 17 | 0 | S04 |
| .....uuugauuggaacgcggaAaag.....    | 1  | 1 | S04 |
| .....uuugauuggaacgcggaCgaag.....   | 1  | 1 | S04 |
| .....uuugauuggaacgcggaagaagcA..... | 3  | 1 | S04 |
| .....uuugauuggaacgcggaagaagcc..... | 2  | 0 | S04 |
| .....uuugauuggaGgacgaagaagcc.....  | 1  | 1 | S04 |
| .....uuugauuggaacAacgaagaagcc..... | 1  | 1 | S04 |
| .....uugGuuggaacgcggaaga.....      | 1  | 1 | S04 |
| .....uugauuggaacgcggaagaagc.....   | 4  | 0 | S04 |
| .....Cugauuggaacgcggaagaagc.....   | 1  | 1 | S04 |
| .....uugauuggaacgcggaGgaagc.....   | 1  | 1 | S04 |
| .....uugauuAgaacgcggaagaagcc.....  | 1  | 1 | S04 |
| .....ugauuggaacgcggaaga.....       | 1  | 0 | S04 |
| .....ugauuggaacgcggaagaa.....      | 1  | 0 | S04 |
| .....ugauuggaacgcggaagaag.....     | 1  | 0 | S04 |
| .....ugauuggaacgcggaagaagc.....    | 2  | 0 | S04 |
| .....uUauuggaacgcggaagaagcc.....   | 1  | 1 | S04 |
| .....ugauuggaacgcggaagaagcc.....   | 1  | 0 | S04 |
| .....gauuggaacgcggaagaagc.....     | 1  | 0 | S04 |
| .....gaAuggaacgcggaagaagcc.....    | 1  | 1 | S04 |
| .....gauuggaacgcggaagaagcA.....    | 1  | 1 | S04 |
| .....gauuggaacgcggaagaagcc.....    | 1  | 0 | S04 |
| .....auuggaacgcggaagaagc.....      | 1  | 0 | S04 |
| .....auuggaacgcggaagaagcc.....     | 2  | 0 | S04 |
| .....uuggaacgcggaagaagccA.....     | 1  | 1 | S04 |
| .....aagauaagaccagcuccccuagc.....  | 1  | 0 | S04 |







Provisional ID : chrCnn\_random\_3529359  
 Score total : 0.2  
 Score for star read(s) : -1.3  
 Score for read counts : -0.3  
 Score for mfe : 1.8  
 Score for randfold : 0  
 Score for cons. seed :  
 Total read count : 11  
 Mature read count : 1  
 Loop read count : 10  
 Star read count : 0

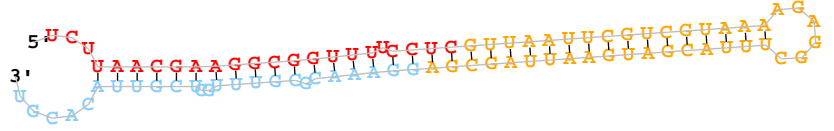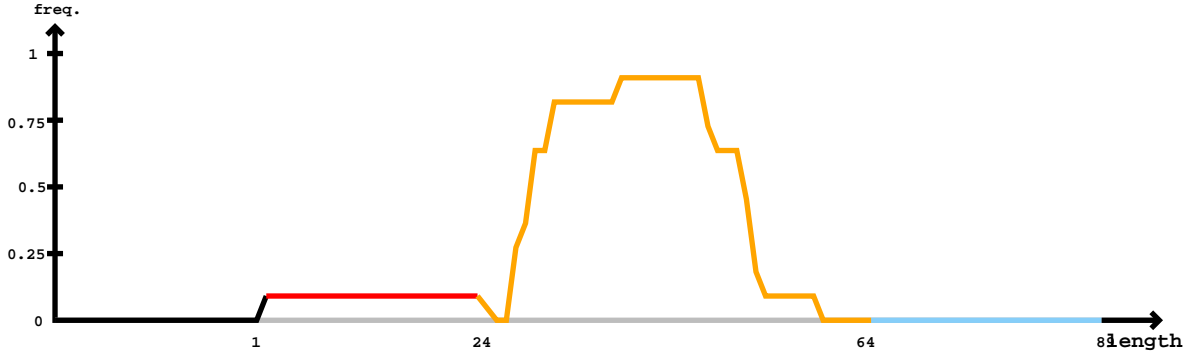

**Mature**

**Star**

| 5' -                                                                                                                                                                                  |                                                      | -3' | exp | reads | mm | sample |
|---------------------------------------------------------------------------------------------------------------------------------------------------------------------------------------|------------------------------------------------------|-----|-----|-------|----|--------|
| uccacucaagaacacaca <u>u</u> cuu <u>aa</u> cgaaagggcgguuu <u>ucc</u> uguu <u>aa</u> uucgucgu <u>aaa</u> aagaggcuuuacgaa <u>uu</u> agcgaggaacgcg <u>uu</u> ugcucgu <u>ua</u> cacgucgcuc | .....(((((((((((((((.....))))))))))))))))))))))..... |     |     | 1     | 0  | S03    |
| .....cgucgu <u>aaa</u> aagaggcuuuacg.....                                                                                                                                             |                                                      |     |     | 1     | 0  | S04    |
| .....cuu <u>aa</u> cgaaagggcgguuu <u>ucc</u> .....                                                                                                                                    |                                                      |     |     | 1     | 0  | S04    |
| ..... <u>aa</u> uucgucgu <u>aaa</u> aagaggcu.....                                                                                                                                     |                                                      |     |     | 1     | 0  | S04    |
| ..... <u>aa</u> uucgucgu <u>aaa</u> aagaggcuu.....                                                                                                                                    |                                                      |     |     | 1     | 0  | S04    |
| ..... <u>aa</u> uucgucgu <u>aaa</u> aagaggcuuu <u>u</u> A.....                                                                                                                        |                                                      |     |     | 1     | 1  | S04    |
| ..... <u>aa</u> uucgucgu <u>aaa</u> aagaggcuuu <u>u</u> A.....                                                                                                                        |                                                      |     |     | 1     | 1  | S04    |
| ..... <u>aa</u> uucgucgu <u>aaa</u> aagaggcu.....                                                                                                                                     |                                                      |     |     | 1     | 0  | S04    |
| .....uucgucgu <u>aaa</u> aagaggcuuuac.....                                                                                                                                            |                                                      |     |     | 1     | 0  | S04    |
| .....uucgucgu <u>aaa</u> aagaggcuuu <u>ac</u> ga.....                                                                                                                                 |                                                      |     |     | 1     | 0  | S04    |
| .....cgucgu <u>aaa</u> aagaggcuuuacg.....                                                                                                                                             |                                                      |     |     | 1     | 0  | S04    |
| .....aaagaggcuuuacgaa <u>uu</u> .....                                                                                                                                                 |                                                      |     |     | 1     | 0  | S04    |







Provisional ID : chrUnn\_random\_3545545  
 Score total : 0.6  
 Score for star read(s) : -1.3  
 Score for read counts : 0  
 Score for mfe : 1.9  
 Score for randfold : 0  
 Score for cons. seed :  
 Total read count : 25  
 Mature read count : 12  
 Loop read count : 11  
 Star read count : 2

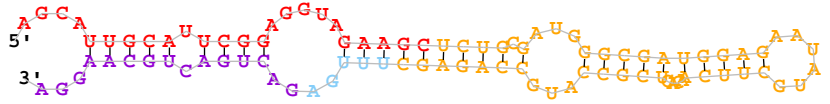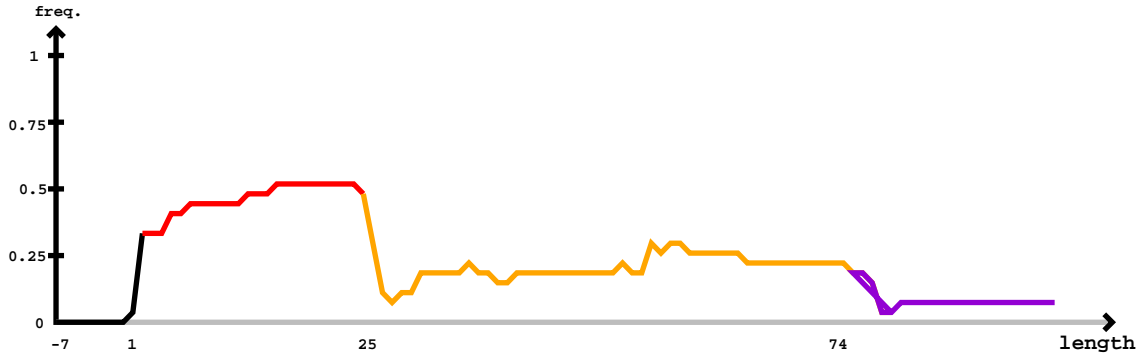

### Mature

### Star

|                                                                                                                                                                                                                             | reads | mm | sample |
|-----------------------------------------------------------------------------------------------------------------------------------------------------------------------------------------------------------------------------|-------|----|--------|
| 5' - <b>g</b> ugaau <b>cag</b> cau <b>gcauucgg</b> aggu <b>agaagc</b> uc <b>ugcga</b> ugggg <b>cgau</b> ggaga <b>auaug</b> cu <b>ucaaca</b> cucg <b>ccaugc</b> cagag <b>cuuug</b> agacug <b>caagga</b> acugau <b>ug</b> -3' | obs   |    |        |
| gugaau <b>cag</b> cau <b>gcauucgg</b> aggu <b>agaagc</b> uc <b>ugcga</b> ugggg <b>cgau</b> ggaga <b>auaug</b> cu <b>ucaaca</b> cucg <b>ccaugc</b> cagag <b>cuuug</b> agacug <b>caagga</b> acugau <b>ug</b>                  | exp   |    |        |
| (((.....(((.....(((.....(((.....(((.....)))))).....)))))).....)))))).....))))). .                                                                                                                                           |       |    |        |
| ..... <b>agcau</b> ugcau <b>ucgg</b> aggu <b>agaagc</b> .....                                                                                                                                                               | 2     | 0  | S03    |
| ..... <b>auugcau</b> uc <b>gg</b> aggu <b>agaagc</b> .....                                                                                                                                                                  | 1     | 0  | S03    |
| ..... <b>gaugggcga</b> ugggaga <b>auaug</b> cuuc.....                                                                                                                                                                       | 1     | 0  | S03    |
| ..... <b>gcgaugg</b> agaga <b>auaug</b> cu <b>ucaaca</b> .....                                                                                                                                                              | 1     | 0  | S03    |
| ..... <b>aacacucgccaugc</b> cagag <b>cuuug</b> .....                                                                                                                                                                        | 1     | 0  | S03    |
| ..... <b>cacucgccaugc</b> cagag <b>cuuuu</b> .....                                                                                                                                                                          | 1     | 0  | S03    |
|                                                                                                                                                                                                                             |       |    |        |
| ..... <b>cagcau</b> ugcau <b>ucgg</b> aggu <b>agaag</b> .....                                                                                                                                                               | 1     | 0  | S04    |
| ..... <b>agcau</b> ugcau <b>ucgg</b> aggu <b>agaagc</b> .....                                                                                                                                                               | 4     | 0  | S04    |
| ..... <b>agcau</b> ugcau <b>ucgg</b> aggu <b>agaagA</b> .....                                                                                                                                                               | 1     | 1  | S04    |
| ..... <b>agcau</b> ugcau <b>ucgg</b> aggu <b>agaagU</b> .....                                                                                                                                                               | 1     | 1  | S04    |
| ..... <b>auugcau</b> uc <b>gg</b> aggu <b>agaagcuc</b> .....                                                                                                                                                                | 1     | 0  | S04    |
| ..... <b>ugcau</b> uc <b>gg</b> aggu <b>agaagc</b> .....                                                                                                                                                                    | 1     | 0  | S04    |
| ..... <b>Aggag</b> gu <b>agaagcuc</b> ug <b>cgau</b> ggg.....                                                                                                                                                               | 1     | 1  | S04    |
| ..... <b>aAgu</b> aga <b>agcuc</b> ug <b>cgau</b> ggg <b>cg</b> .....                                                                                                                                                       | 1     | 1  | S04    |
| ..... <b>gcgaugg</b> gcgauggaga <b>auaugc</b> C.....                                                                                                                                                                        | 1     | 1  | S04    |
| ..... <b>gaugggcga</b> ugggaga <b>auaug</b> cu <b>ca</b> .....                                                                                                                                                              | 1     | 0  | S04    |
| ..... <b>ggaga</b> au <b>aug</b> cu <b>ucaaca</b> cucgC.....                                                                                                                                                                | 1     | 1  | S04    |
| ..... <b>uucaaca</b> cucg <b>ccaugc</b> cagag <b>cu</b> .....                                                                                                                                                               | 1     | 0  | S04    |
| ..... <b>aacacucgccaugc</b> cagag <b>cuuug</b> .....                                                                                                                                                                        | 2     | 0  | S04    |
| ..... <b>aacacucgccG</b> uccagag <b>cuuuga</b> .....                                                                                                                                                                        | 1     | 1  | S04    |
| ..... <b>gacug</b> acug <b>caagga</b> acugau <b>ug</b> .....                                                                                                                                                                | 1     | 0  | S04    |
| ..... <b>acug</b> acug <b>caagga</b> Auga.....                                                                                                                                                                              | 1     | 1  | S04    |

Provisional ID : chrUnn\_random\_3556895  
 Score total : 16.1  
 Score for star read(s) : 3.9  
 Score for read counts : 10.3  
 Score for mfe : 1.8  
 Score for randfold : 0  
 Score for cons. seed :  
 Total read count : 32  
 Mature read count : 23  
 Loop read count : 7  
 Star read count : 2

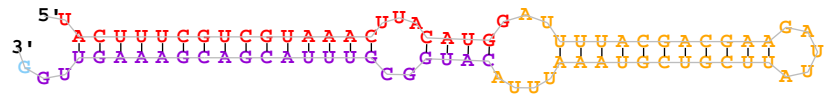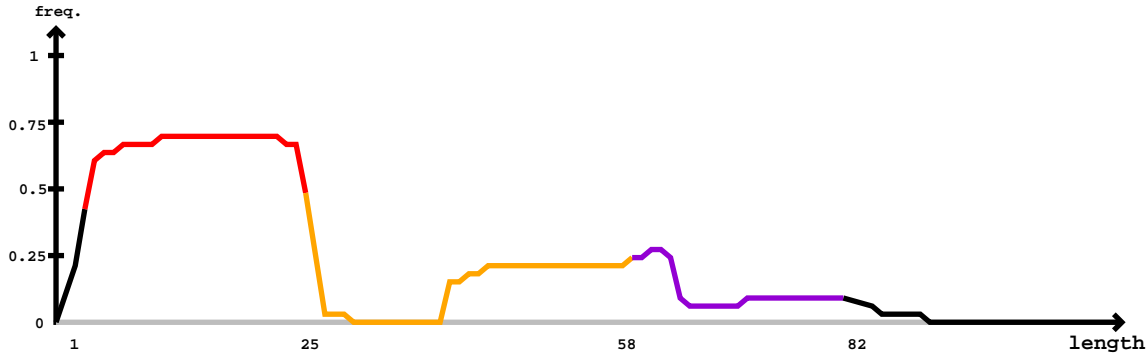

**Mature**

**Star**

|      |                                                                                                                |     |       |    |
|------|----------------------------------------------------------------------------------------------------------------|-----|-------|----|
| 5' - | guacuuucgucguaaacuuacauggauuuuacgacgaagauuuuucgucguaaaauuucauggcguuuacgacgaaaguuggauuucucauaaacugcguuguaaacacc | -3' | obs   |    |
|      | guacuuucgucguaaacuuacauggauuuuacgacgaagauuuuucgucguaaaauuucauggcguuuacgacgaaaguuggauuucucauaaacugcguuguaaacacc |     | exp   |    |
|      | ..(((((((((((((((.....((((((((((((((((.....)))))))))))))).....))))))..)))))))))).....((((.....)))))).....      |     | reads | mm |
|      | guacuuucgucguaaacuuacaug.....                                                                                  |     | 2     | 0  |
|      | guacuuucgucguaaacuuacaugg.....                                                                                 |     | 1     | 0  |
|      | guacuuucgucguaaacuuacaugga.....                                                                                |     | 1     | 0  |
|      | .uacuuucgucguaaacuuacaugg.....                                                                                 |     | 2     | 0  |
|      | ..acuuucgucguaaacuuacaugga.....                                                                                |     | 2     | 0  |
|      | ...cuuucgucguaaacuuacauA.....                                                                                  |     | 1     | 1  |
|      | .....ucguaaaGuuacauggauuu.....                                                                                 |     | 1     | 1  |
|      | .....auuuuucgucguaaaauuacaugg.....                                                                             |     | 1     | 0  |
|      | .....uauucgucguaaaauuacaug.....                                                                                |     | 1     | 0  |
|      | .....gacgaaaguuggauuucuc.....                                                                                  |     | 1     | 0  |
|      | guacuuucgucguaaacuuaca.....                                                                                    |     | 1     | 0  |
|      | guacuuucgucguaaacuuacauA.....                                                                                  |     | 1     | 1  |
|      | guacuuucgucguaaacuuacGug.....                                                                                  |     | 1     | 1  |
|      | .uacuuucgucguaaacuuacaug.....                                                                                  |     | 1     | 0  |
|      | .uacuuucgucguaaacuuacaugA.....                                                                                 |     | 1     | 1  |
|      | .uacuuucgucguaaacuuacaugg.....                                                                                 |     | 3     | 0  |
|      | ..acuuucgucguaaacuuacaugg.....                                                                                 |     | 1     | 0  |
|      | ..acuuucgucguaaacuuacaugA.....                                                                                 |     | 1     | 1  |
|      | ..acuuucgucguaaacuuacaugga.....                                                                                |     | 2     | 0  |
|      | ...uucgucguaaacuuacaugg.....                                                                                   |     | 1     | 0  |
|      | .....auuuuucgucguaaaauuacaugg.....                                                                             |     | 3     | 0  |
|      | .....aGuuuucgucguaaaauuacaugg.....                                                                             |     | 1     | 1  |
|      | .....uucgucguaaGuuacauggc.....                                                                                 |     | 1     | 1  |
|      | .....cauggcguuuacgacgaaaguuC.....                                                                              |     | 1     | 1  |
|      | .....uggcguuuacgCgaaaguuggau.....                                                                              |     | 1     | 1  |

Provisional ID : chrUnn\_random\_3570806  
 Score total : 8  
 Score for star read(s) : 3.9  
 Score for read counts : 7.8  
 Score for mfe : -3.5  
 Score for randfold : 0  
 Score for cons. seed :  
 Total read count : 27  
 Mature read count : 22  
 Loop read count : 4  
 Star read count : 1

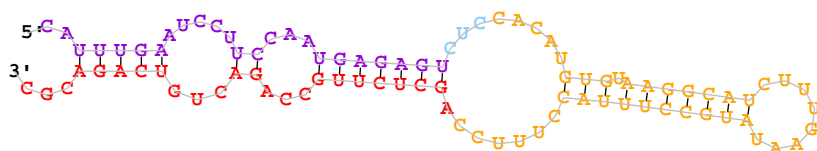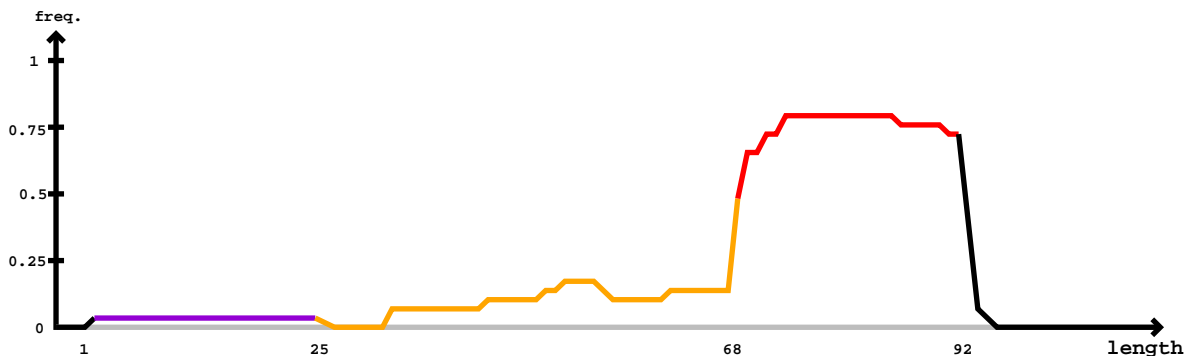

**Star**

**Mature**

| 5' -                                                                                                                 | reads | mm | sample |
|----------------------------------------------------------------------------------------------------------------------|-------|----|--------|
| cgcauuugaauccuuccaagagagagucuccacauguguaaggcaucuuugaauaugccuuuacccuuuccagcucuuGCCAGACUGUCAGACGCGguuccuccuuauccucucaa | 1     | 0  | S03    |
| cgcauuugaauccuuccaagagagagucuccacauguguaaggcaucuuugaauaugccuuuacccuuuccagcucuuGCCAGACUGUCAGACGCGguuccuccuuauccucucaa | 1     | 1  | S03    |
| .....uguguaggcaucuuugaauau.....                                                                                      | 1     | 0  | S03    |
| .....gaGuaugccuuuacccuuuccagcu.....                                                                                  | 1     | 1  | S03    |
| .....auaugccuuuacccuuuccagcucuu.....                                                                                 | 1     | 0  | S03    |
| .....ccuuuccagcucuuGCCAGACUGUCAGACGCG.....                                                                           | 1     | 0  | S03    |
| .....agcucuuGCCAGACUGUCAGACGCGU.....                                                                                 | 1     | 1  | S03    |
| .....agcucuuGCCAGACUGUCAGACGCG.....                                                                                  | 5     | 0  | S03    |
| .....gcucuuGCCAGACUGUCAGACGCG.....                                                                                   | 1     | 0  | S03    |
| .....cauuugaauccuuccaagagagagu.....                                                                                  | 1     | 0  | S04    |
| .....uguguGaggcaucuuugaauaug.....                                                                                    | 1     | 1  | S04    |
| .....aucCuugaauaugccuuuacccuu.....                                                                                   | 1     | 1  | S04    |
| .....ccagcucuuGCCAGACUGUCAGACGCG.....                                                                                | 1     | 0  | S04    |
| .....agcucuuGCCAGACUGUCAGACGCGU.....                                                                                 | 1     | 1  | S04    |
| .....agcucuuGCCAGACUGUCAGACGCG.....                                                                                  | 1     | 0  | S04    |
| .....agcucuuGCCAGACUGUCAGACGCG.....                                                                                  | 1     | 1  | S04    |
| .....agcucuuGCCAGACUGUCAGACGCG.....                                                                                  | 1     | 0  | S04    |
| .....gcucuuGCCAGACUGUCAGACGCG.....                                                                                   | 1     | 0  | S04    |
| .....gcucuuGCCAGACUGUCAGACGCG.....                                                                                   | 2     | 0  | S04    |
| .....gcucuuGCCAGACUGUCAGACGCGU.....                                                                                  | 1     | 1  | S04    |
| .....ucuuGCCAGACUGUCAGACGCGU.....                                                                                    | 1     | 0  | S04    |
| .....ucuuGCCAGACUGUCAGACGCGUA.....                                                                                   | 1     | 1  | S04    |
| .....cuuUccagacugucagacgCG.....                                                                                      | 1     | 1  | S04    |
| .....uGCCAGACUGUCAGACGCGA.....                                                                                       | 2     | 1  | S04    |
| .....GCCAGACUGUCAGACGCG.....                                                                                         | 1     | 0  | S04    |

Provisional ID : chrUnn\_random\_3576358  
 Score total : 0.2  
 Score for star read(s) : -1.3  
 Score for read counts : 0  
 Score for mfe : 1.5  
 Score for randfold : 0  
 Score for cons. seed :  
 Total read count : 100  
 Mature read count : 97  
 Loop read count : 2  
 Star read count : 1

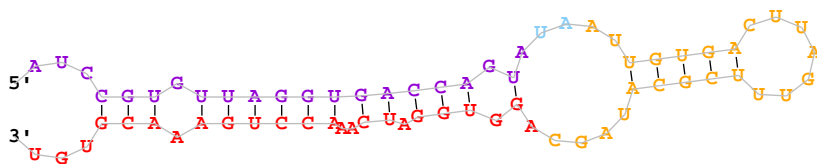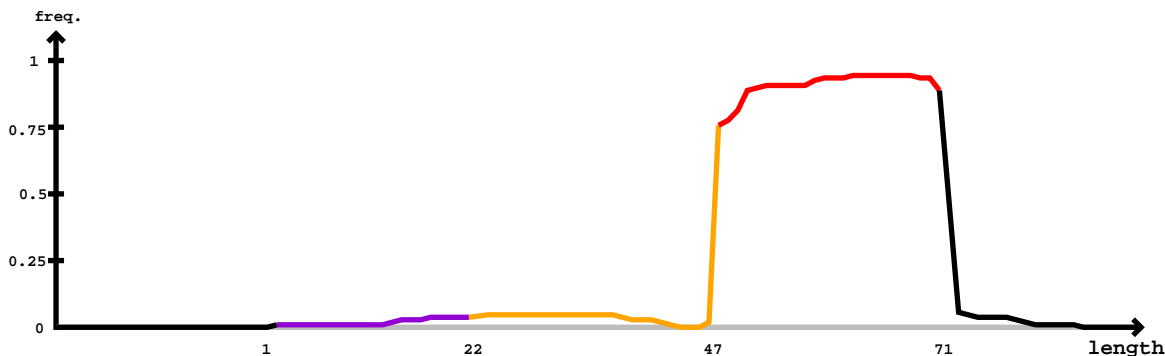

**Star**

**Mature**

| 5'                                                                                                                                                              | 3' | obs | reads | mm | sample |
|-----------------------------------------------------------------------------------------------------------------------------------------------------------------|----|-----|-------|----|--------|
| ugugauugggaaagugagccga <u>aucguguuaggugaccagua</u> ua <u>aa</u> uugugacuu <u>aguuu</u> ucgcauagc <u>agguggaucaaa</u> accugaa <u>acgugu</u> uggcgucugagucccgucuc |    | exp |       |    |        |
| ugugauugggaaagugagccgau <u>ucguguuaggugaccagua</u> ua <u>aa</u> uugugacuu <u>aguuu</u> ucgcauagc <u>agguggaucaaa</u> accugaa <u>acgugu</u> uggcgucugagucccgucuc |    |     | 1     | 1  | S03    |
| .....aucguguuaggugaccaguaG.....                                                                                                                                 |    |     | 1     | 0  | S03    |
| .....ugaccaguaaa <u>uu</u> ugacuuagu.....                                                                                                                       |    |     | 1     | 0  | S03    |
| .....gaccaguaaa <u>uu</u> ugacuuagu.....                                                                                                                        |    |     | 1     | 0  | S03    |
| .....caguaaa <u>uu</u> ugacuu <u>aguuu</u> cg.....                                                                                                              |    |     | 1     | 0  | S03    |
| .....ua <u>uu</u> ugacuu <u>aguuu</u> cgC.....                                                                                                                  |    |     | 1     | 0  | S03    |
| .....caggug <u>U</u> aucaaa <u>accugaa</u> acgug.....                                                                                                           |    |     | 1     | 1  | S03    |
| .....cagguggaucaaa <u>accugaa</u> ac <u>Aug</u> .....                                                                                                           |    |     | 1     | 1  | S03    |
| .....agguggaucaaa <u>accugaa</u> acgug.....                                                                                                                     |    |     | 1     | 0  | S03    |
| .....agguggaucaaa <u>accugaa</u> acgugA.....                                                                                                                    |    |     | 2     | 1  | S03    |
| .....aggugA <u>au</u> caaa <u>accugaa</u> acgugu.....                                                                                                           |    |     | 1     | 1  | S03    |
| .....agguggaucaaa <u>accugaa</u> acgugu.....                                                                                                                    |    |     | 29    | 0  | S03    |
| .....agguggaucaaa <u>accug</u> G <u>a</u> acgugu.....                                                                                                           |    |     | 1     | 1  | S03    |
| .....agguggaucaaa <u>accugaa</u> acgugG.....                                                                                                                    |    |     | 1     | 1  | S03    |
| .....agguggaucaaa <u>accugaa</u> acgugC.....                                                                                                                    |    |     | 2     | 1  | S03    |
| .....aaccugaa <u>acgugu</u> uggcguc.....                                                                                                                        |    |     | 1     | 0  | S03    |
| .....accugaa <u>acgugu</u> uggcgucu.....                                                                                                                        |    |     | 1     | 0  | S03    |
| .....ugaa <u>acgugu</u> uggcgucugagucc.....                                                                                                                     |    |     | 1     | 0  | S03    |
| .....ua <u>uu</u> ugacuu <u>aguuu</u> cg <u>U</u> a.....                                                                                                        |    |     | 1     | 1  | S04    |
| .....agguggaucaaa <u>accugaa</u> acgugC.....                                                                                                                    |    |     | 1     | 1  | S04    |
| .....agguggaucaaa <u>accugaa</u> acgugu.....                                                                                                                    |    |     | 36    | 0  | S04    |
| .....agA <u>ug</u> gaucaaa <u>accugaa</u> acgugu.....                                                                                                           |    |     | 1     | 1  | S04    |
| .....agguggau <u>U</u> aa <u>accugaa</u> acgugu.....                                                                                                            |    |     | 1     | 1  | S04    |
| .....agguggaucaaa <u>accugaa</u> acgugA <u>u</u> .....                                                                                                          |    |     | 1     | 1  | S04    |
| .....agguggaucaaa <u>accugaa</u> acgugA.....                                                                                                                    |    |     | 1     | 1  | S04    |
| .....gguggaucaaa <u>accugaa</u> acgugA.....                                                                                                                     |    |     | 1     | 1  | S04    |
| .....gguggaucaaa <u>accugaa</u> acgugu.....                                                                                                                     |    |     | 1     | 0  | S04    |
| .....guggaucaaa <u>accugaa</u> acgug.....                                                                                                                       |    |     | 2     | 0  | S04    |
| .....guggaucaaa <u>accugaa</u> acgugu.....                                                                                                                      |    |     | 1     | 0  | S04    |
| .....guggaucaaa <u>accugaa</u> acguguu.....                                                                                                                     |    |     | 1     | 0  | S04    |
| .....uggaucaaa <u>accugaa</u> acgugG.....                                                                                                                       |    |     | 1     | 1  | S04    |
| .....uggaucaaa <u>accugaa</u> acgugu.....                                                                                                                       |    |     | 4     | 0  | S04    |

Star

Mature

|                                                                                                                                                             |   |   |     |
|-------------------------------------------------------------------------------------------------------------------------------------------------------------|---|---|-----|
| ugugauugggaaagugagccga <u>uccguguuaggugaccagua</u> ua <u>auugugacuu</u> aguu <u>ucgcauagc</u> agguggau <u>caaac</u> cuga <u>aac</u> guguuggcgucugaguccgucuc |   |   |     |
| .....ugga <u>A</u> caaac <u>c</u> uga <u>a</u> ac <u>g</u> ugu.....                                                                                         | 1 | 1 | S04 |
| .....uggaucaaac <u>c</u> uga <u>a</u> ac <u>g</u> uguug.....                                                                                                | 1 | 0 | S04 |
| .....uggaucaaac <u>c</u> uga <u>a</u> ac <u>g</u> uguug.....                                                                                                | 1 | 1 | S04 |
| .....g <u>U</u> caaac <u>c</u> uga <u>a</u> ac <u>g</u> ugu.....                                                                                            | 1 | 1 | S04 |
| .....gaucaaac <u>c</u> uga <u>a</u> ac <u>g</u> ugu.....                                                                                                    | 1 | 0 | S04 |
| .....aac <u>c</u> uga <u>a</u> ac <u>g</u> uguuggcgucug.....                                                                                                | 1 | 0 | S04 |
