# Supplementary material for: Small RNA and degradome profiling involved in seed development and oil synthesis of Brassica napus
Source: PubMed Central journal article supplement (PMC6192625; doi:10.1371/journal.pone.0204998), 2018-10-17
Supplement: pone.0204998.s003.pdf [file pone.0204998.s003.pdf]

GLYCOLYSIS / GLUCONEOGENESIS

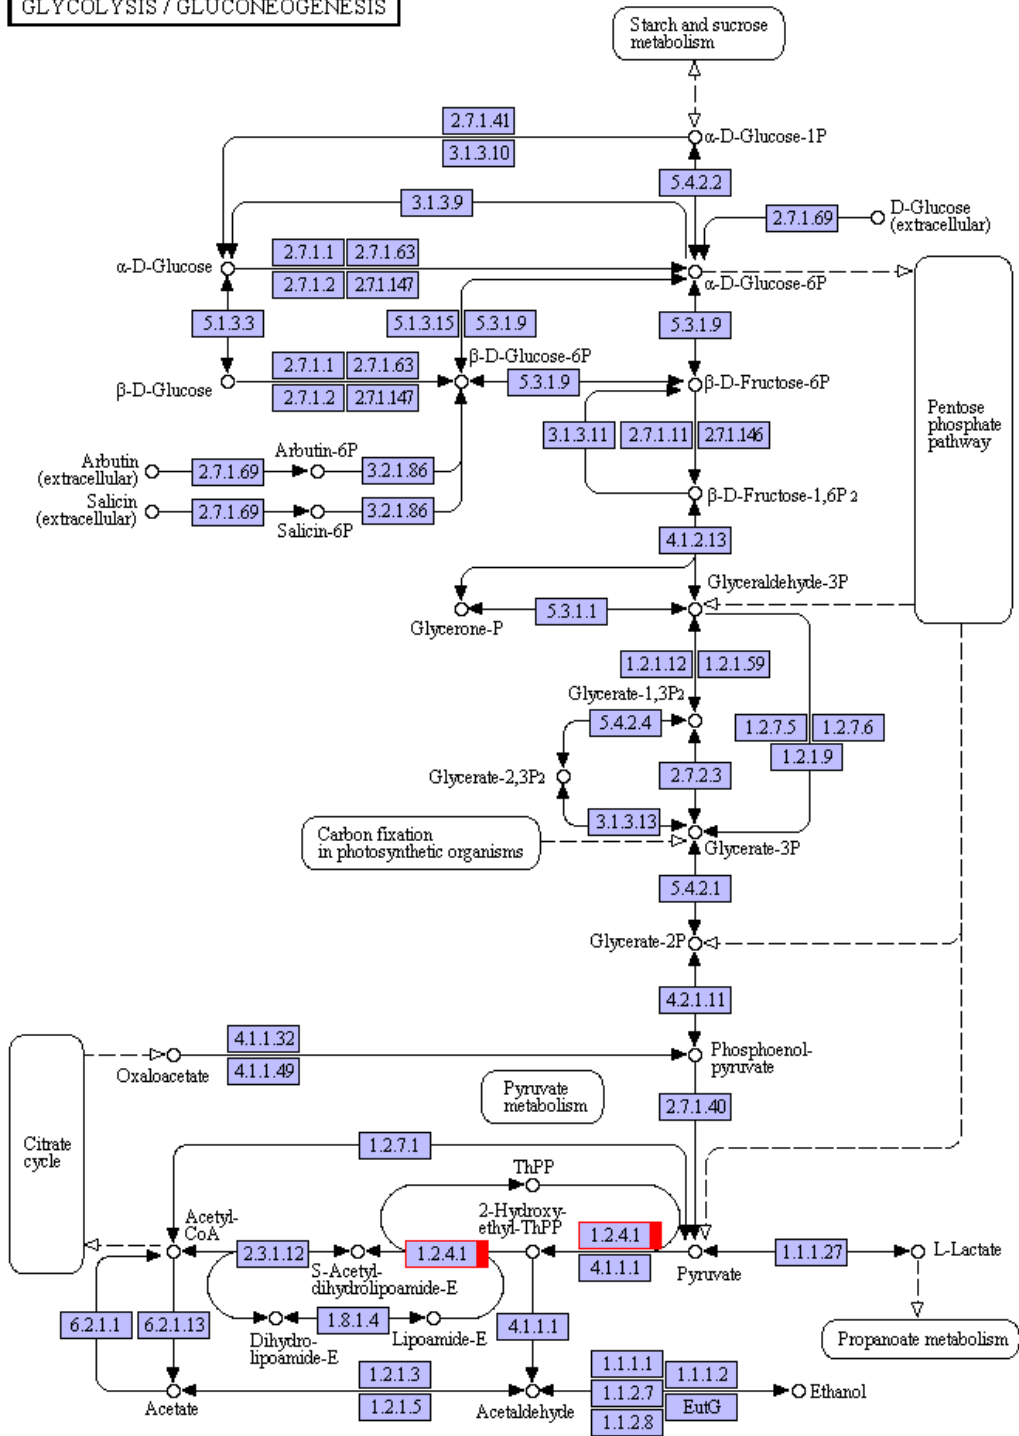

00010 2/4/11  
(c) Kanehisa Laboratories

Ko00010

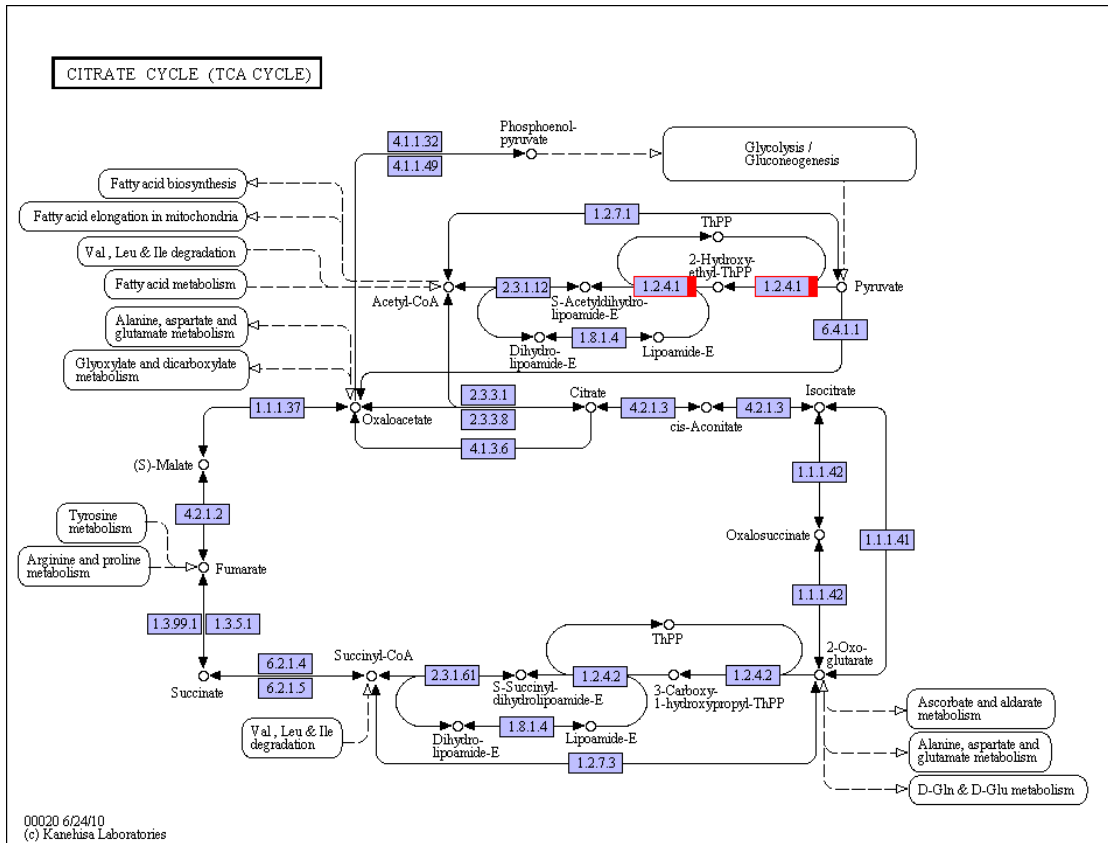

Ko00020

VALINE, LEUCINE AND ISOLEUCINE BIOSYNTHESIS

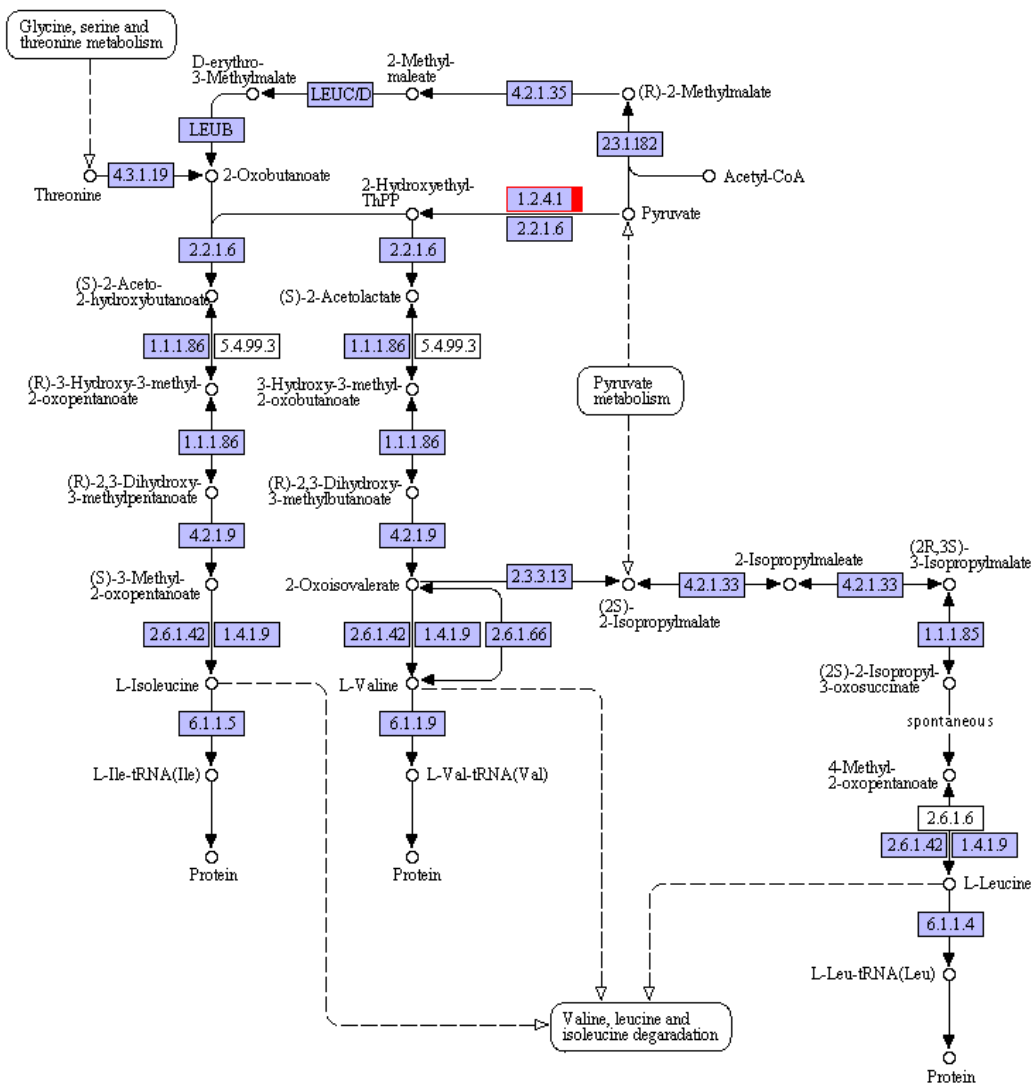

00290 11/16/10  
 (c) Kanehisa Laboratories

Ko00290

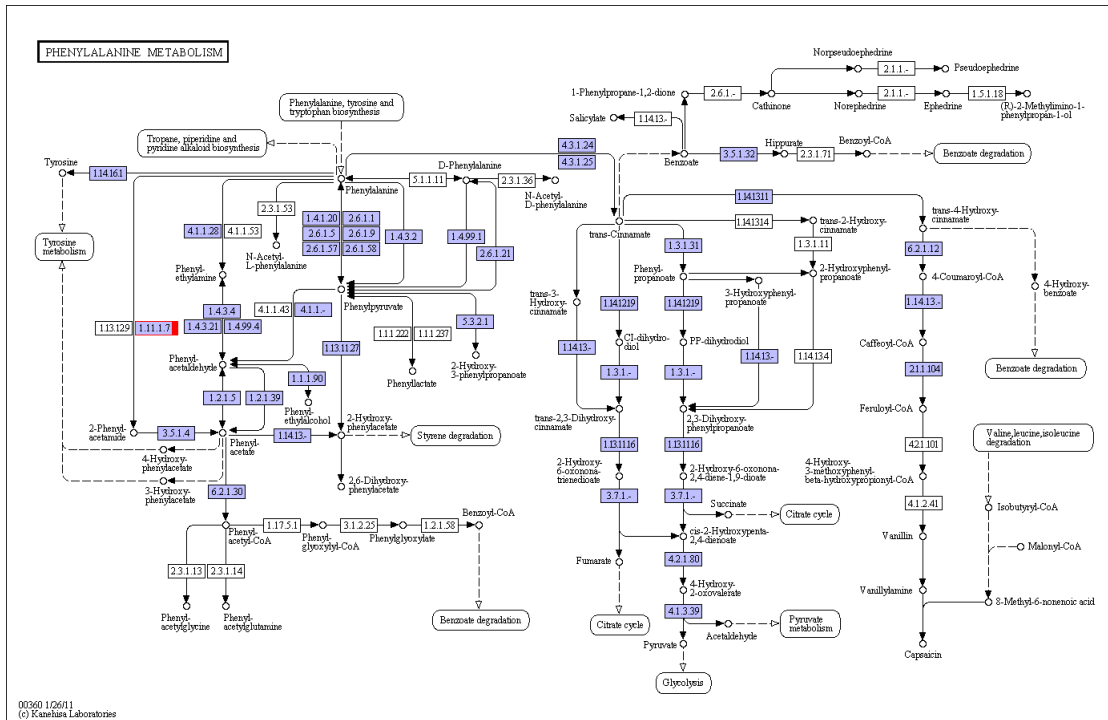

Ko000360

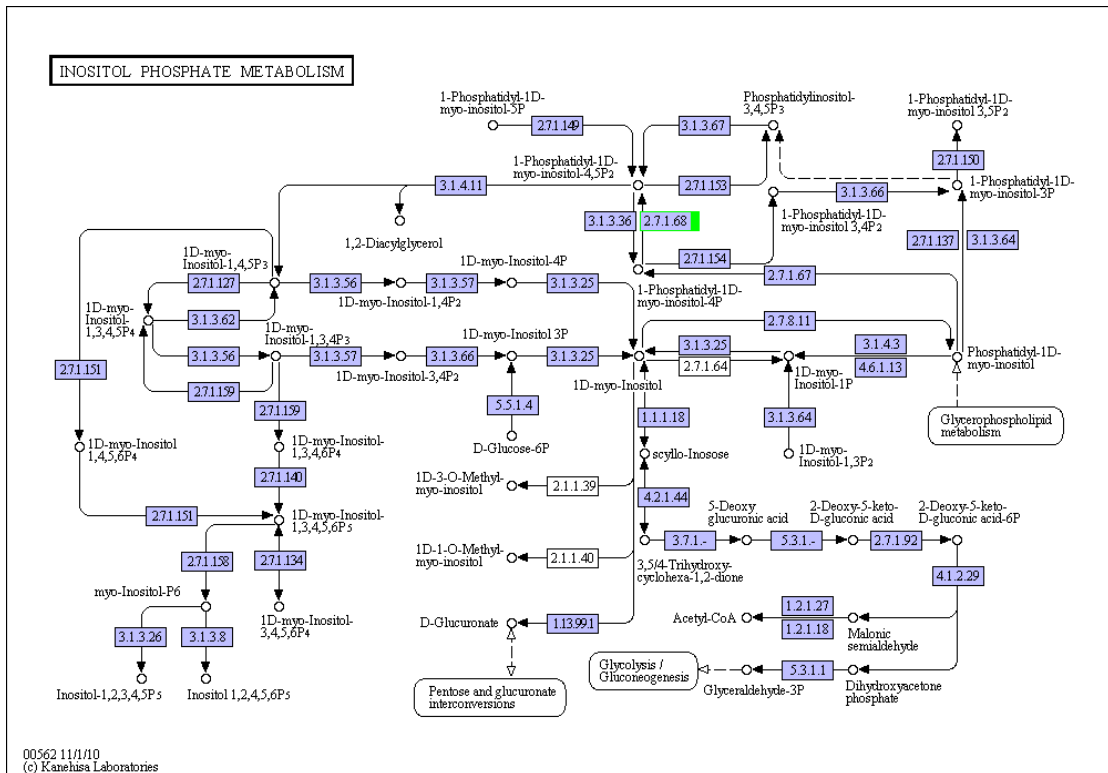

Ko00562

# α-LINOLENIC ACID METABOLISM

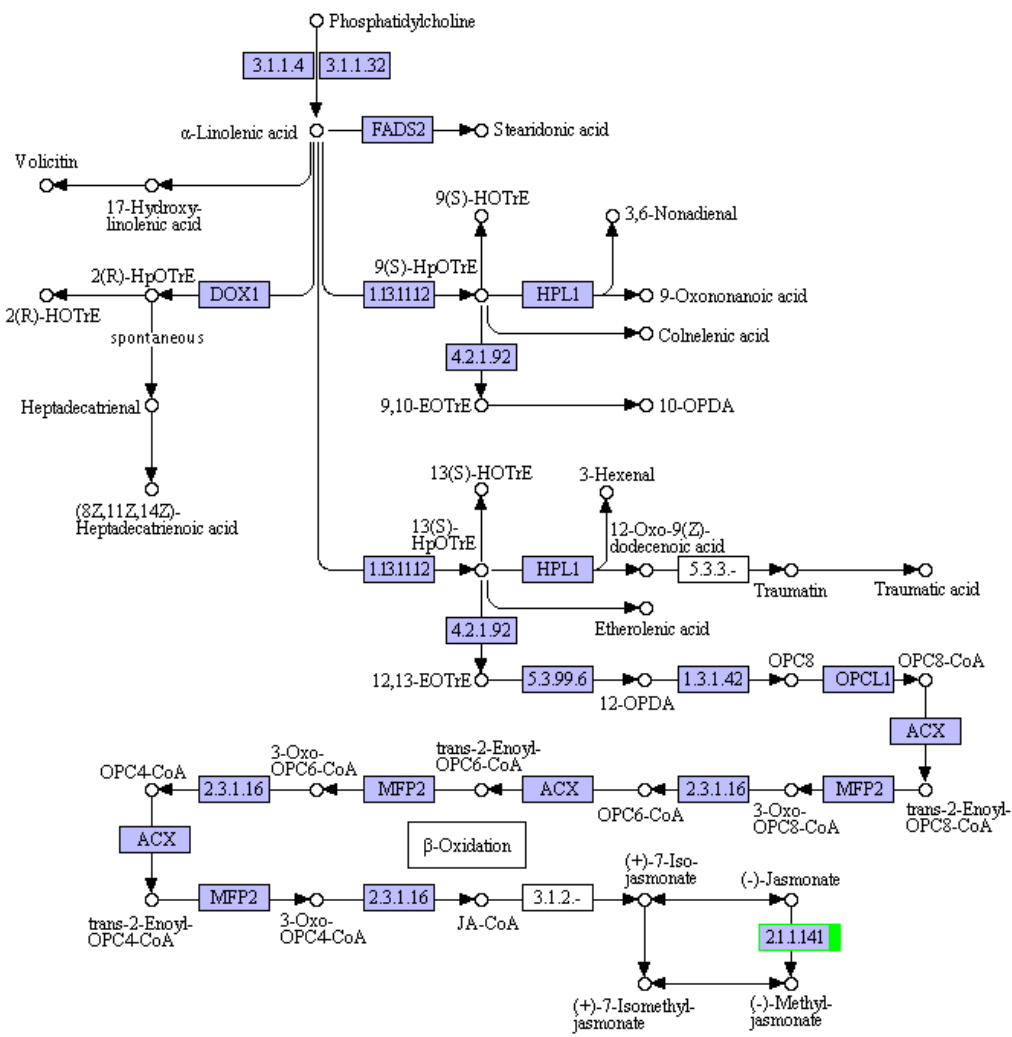

00592 3/22/11  
(c) Kanehisa Laboratories

Ko00592

PYRUVATE METABOLISM

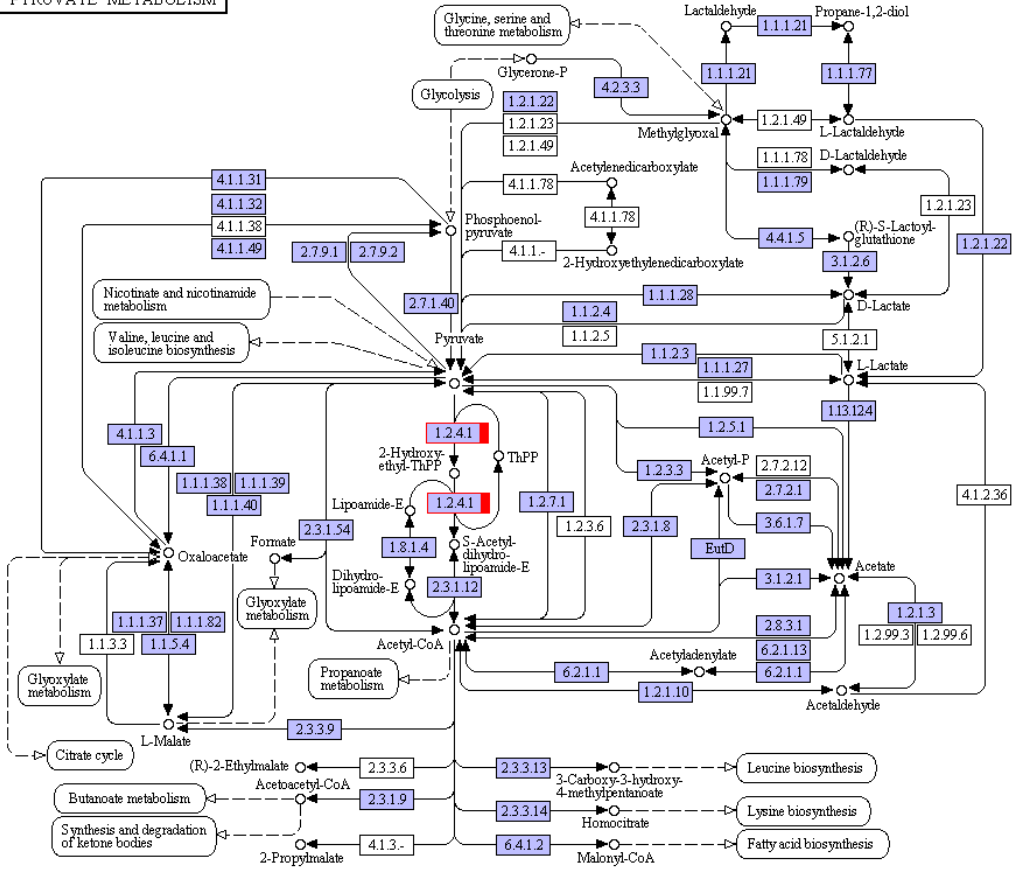

00620 1/25/11  
 (c) Kanehisa Laboratories

Ko00620

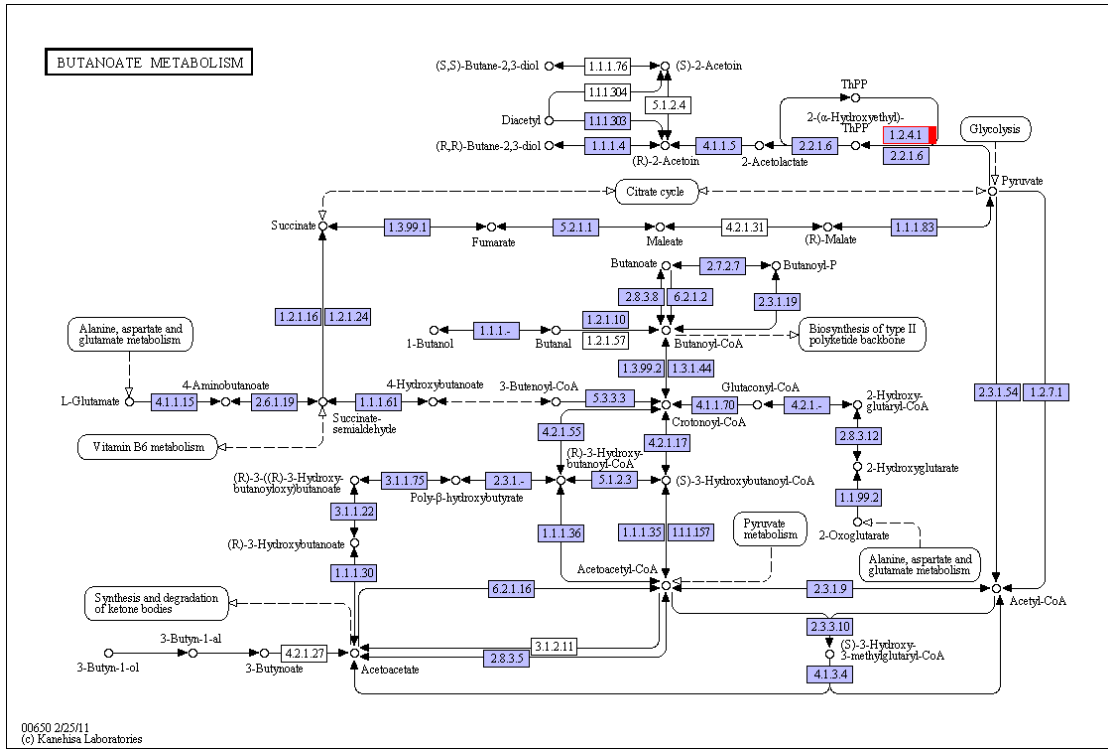

Ko00650

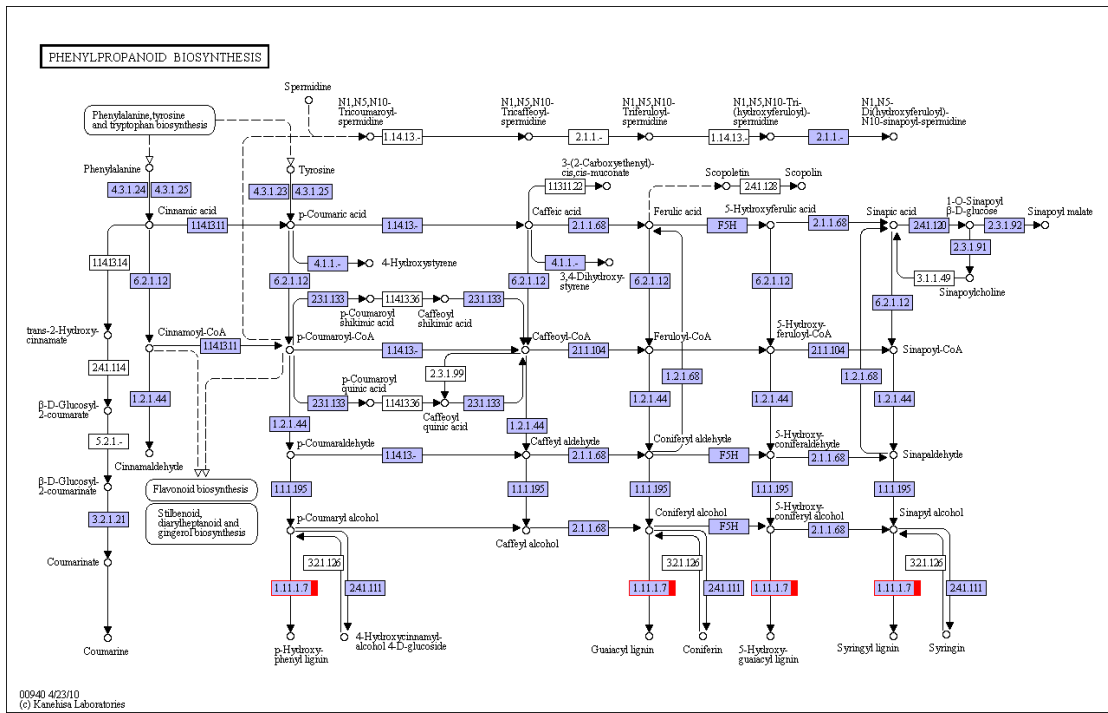

Ko00940

AMINOACYL-tRNA BIOSYNTHESIS

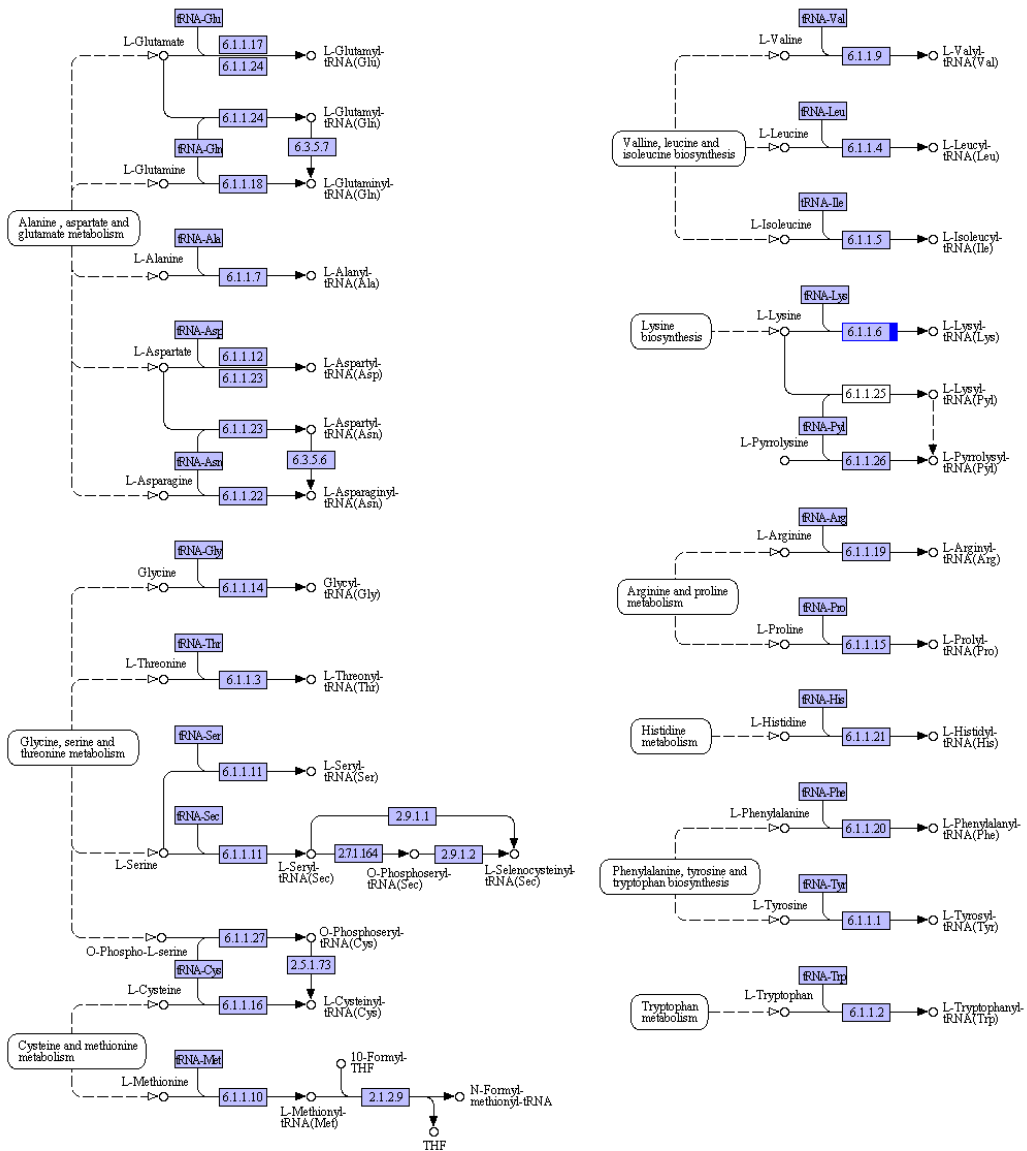

00970 12/2/10  
 (c) Kanehisa Laboratories

Ko00970



**RIBOSOME**

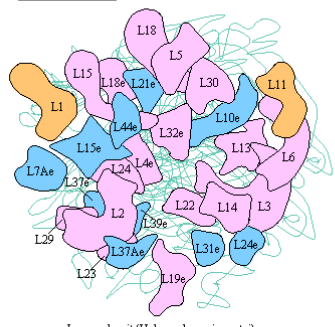

Large subunit (*Haloarcula marismortui*)

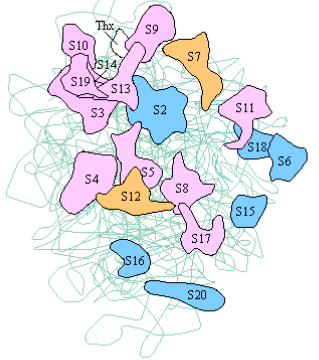

Small subunit (*Thermus aquaticus*)

**Ribosomal RNAs**

|                    |     |    |      |     |
|--------------------|-----|----|------|-----|
| Bacteria / Archaea | 23S | 5S | 16S  |     |
| Eukaryotes         | 25S | 5S | 5.8S | 18S |

**Ribosomal proteins**

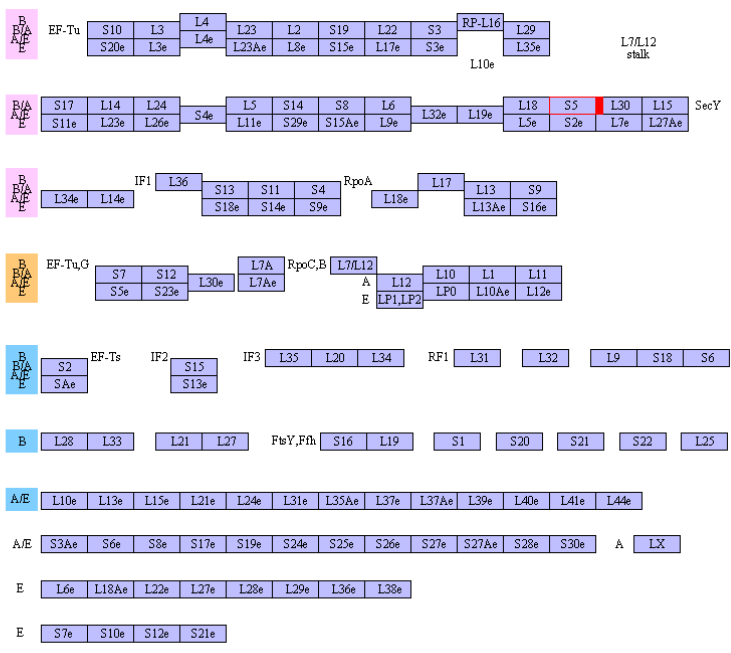

03010 11/29/10  
© Kanehisa Laboratories

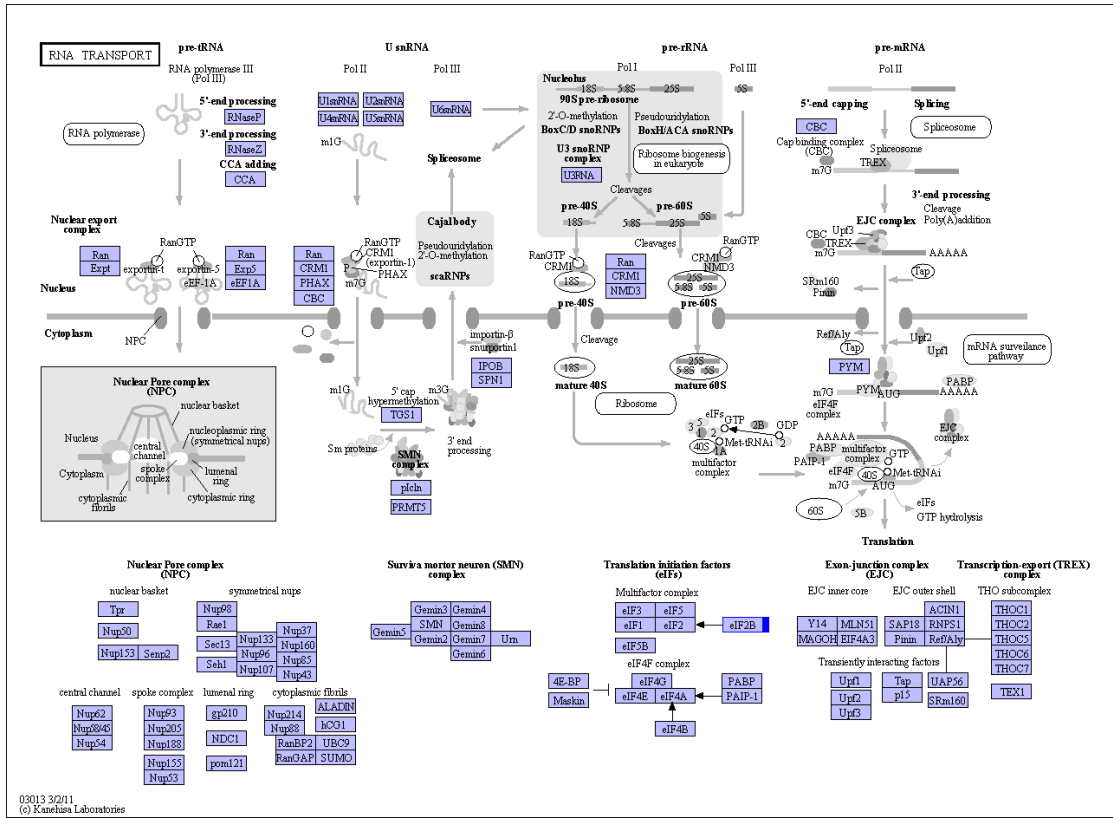

Ko03013

PHOSPHATIDYLINOSITOL SIGNALING SYSTEM

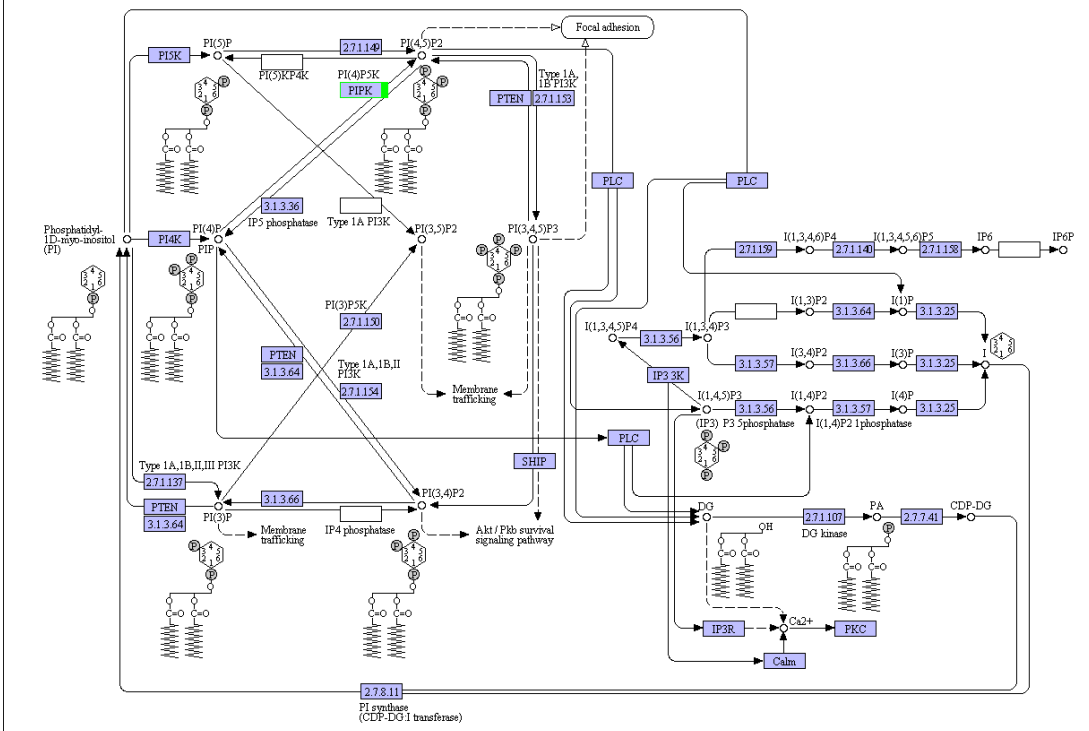

04070 11/11/10  
© Kanehisa Laboratories

Ko04070

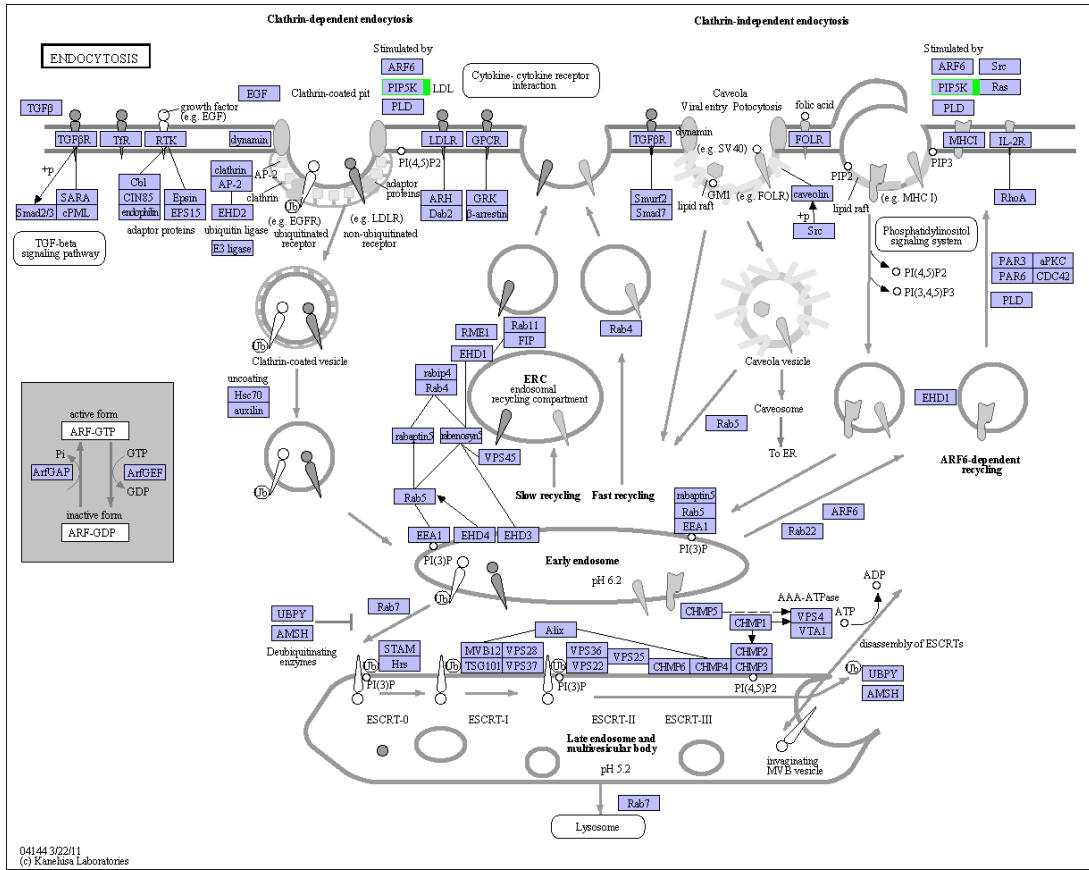

Ko04144
